# Supplementary material for: Comprehensive Identification and Modified-Site Mapping of S-Nitrosylated Targets in Prostate Epithelial Cells
Source: PubMed Central journal article supplement (PMC2816712; doi:10.1371/journal.pone.0009075), 2010-02-05

# (MS/MS spectra for biotinylated peptides in Table S1A)

## PDLIM1 (elfin) (K)GHFFVEDQIYcEK(H)

XCorr: 4.46  $\Delta$ Cn: 0.62

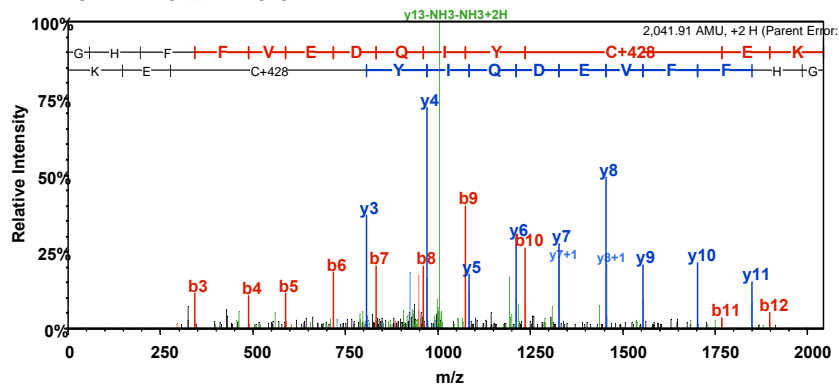

## TUBA1C protein (R)TIQFVDWcPTGFK(V)

XCorr: 3.2  $\Delta$ Cn: 0.48

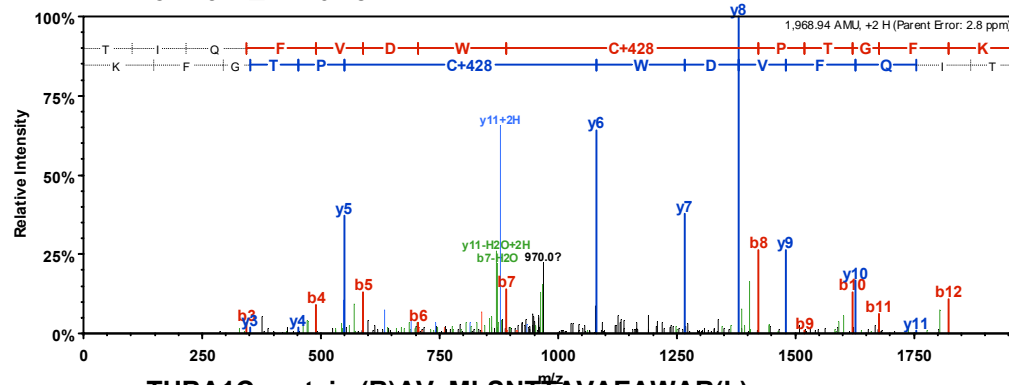

## TUBB2C(R)EIVHLQAGQcGNQIGAK(F)

XCorr: 3.8483  $\Delta$ Cn: 0.479

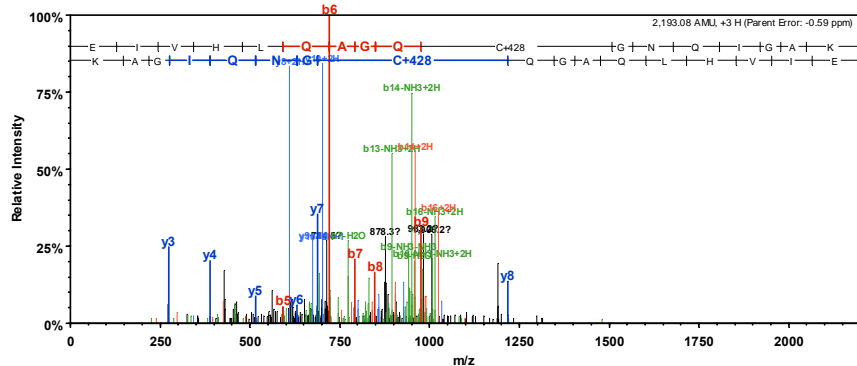

## TUBA1C protein (R)AVcMLSNTTAVAEAWAR(L)

XCorr: 2.59  $\Delta$ Cn: 0.30

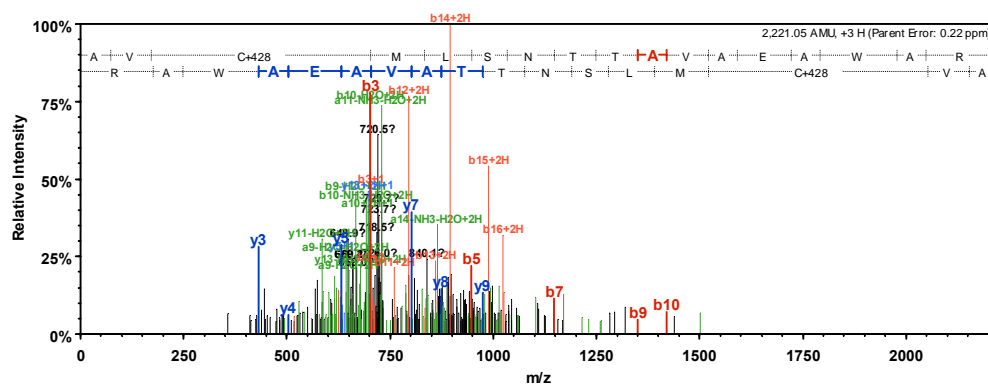

## TUBB2C(K)LTTPTYGDLNHLVSATmSGVTTcLR(F)

XCorr: 5.01  $\Delta$ Cn: 0.581

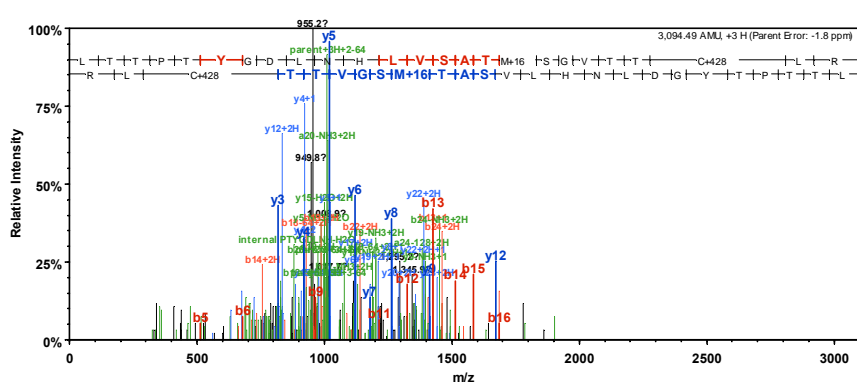

## TUBA1C protein (K)AYHEQLTVAEITNAcFEPANQmVK(C)

XCorr: 2.74  $\Delta$ Cn: 0.15

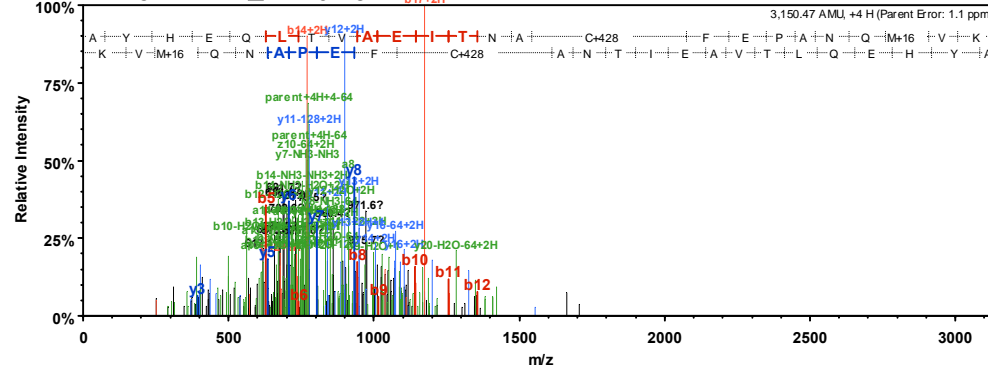

**Putative annexin A2-like protein (K)GLGTDEDSLIEIIcSR(T)**  
**XCorr: 4.16  $\Delta$ Cn: 0.46**

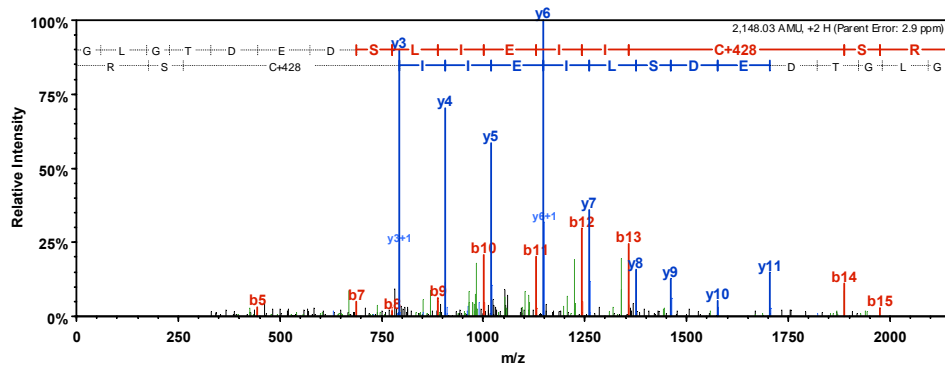

**RTN4 reticulon 4 (K)YSNSALGHVNcTIK(E)**  
**XCorr: 3.29  $\Delta$ Cn: 0.51**

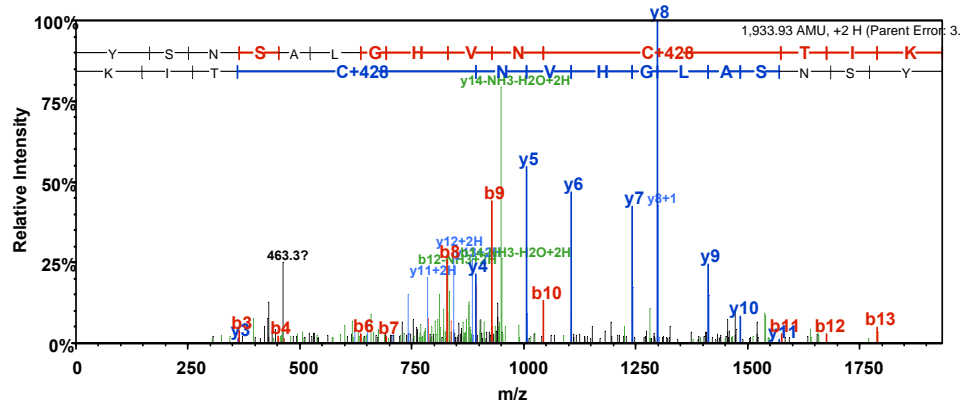

**PLEC1, Plectin 1 (R)VPLDVAcAR(G)**  
**XCorr: 2.67  $\Delta$ Cn: 0.63**

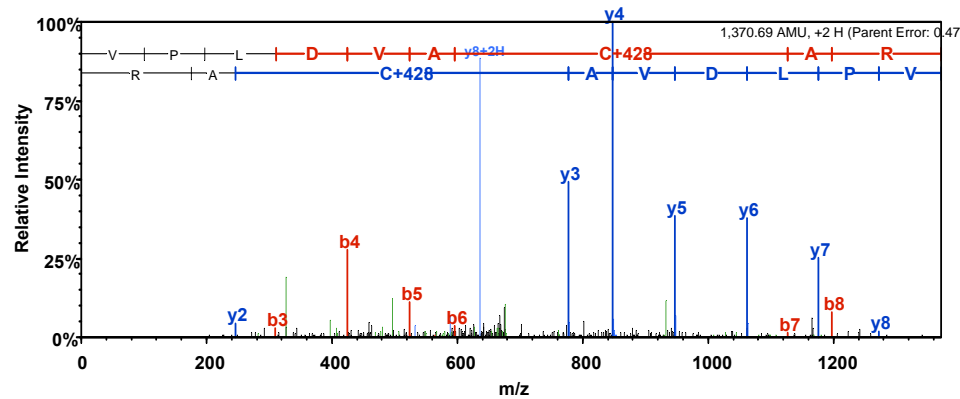

**Isoform 1 of Plectin-1 (R)VPLDVAcAR(G)**  
**XCorr: 2.3  $\Delta$ Cn: 0.36**

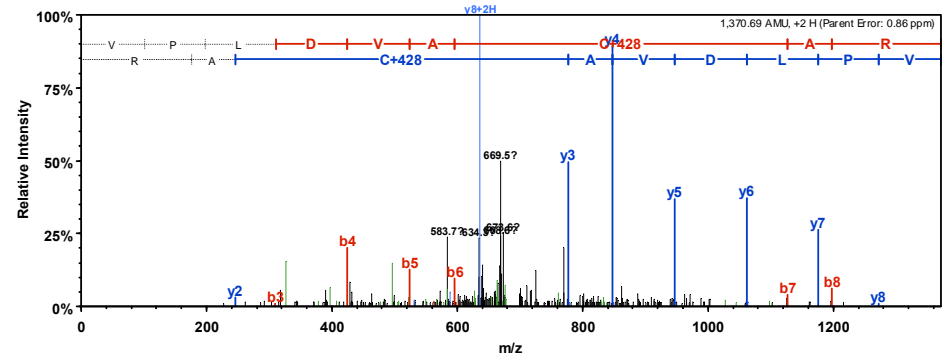

**Isoform 1 of Plectin-1 (R)GcLDEETSR(A)**  
**XCorr: 2.59  $\Delta$ Cn: 0.43**

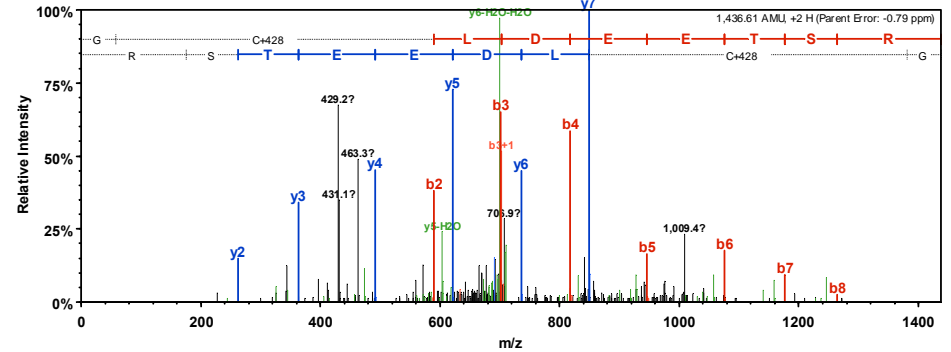

**Isoform 1 of Plectin-1 (R)cRPDQLTGLSLLPLSEK(A)**  
**XCorr: 3.64  $\Delta$ Cn: 0.39**

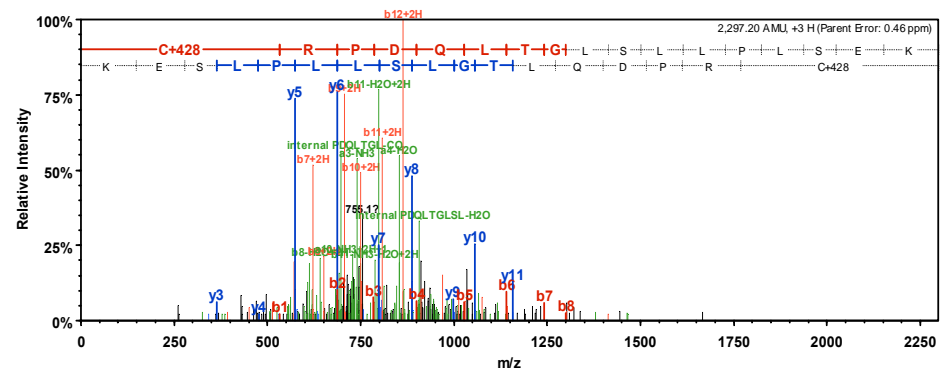

**PLEC1 Plectin 1 (R)LQLEAcETR(T)**  
**XCorr: 2.68 ΔCn: 0.48**

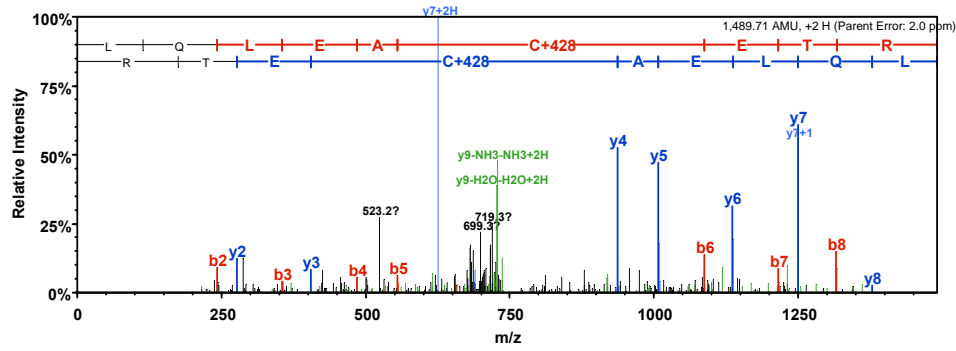

**ACTN1 alpha actinin 1 (K)IcDQWDNLGALTQK(R)**  
**XCorr: 4.83 ΔCn: 0.54**

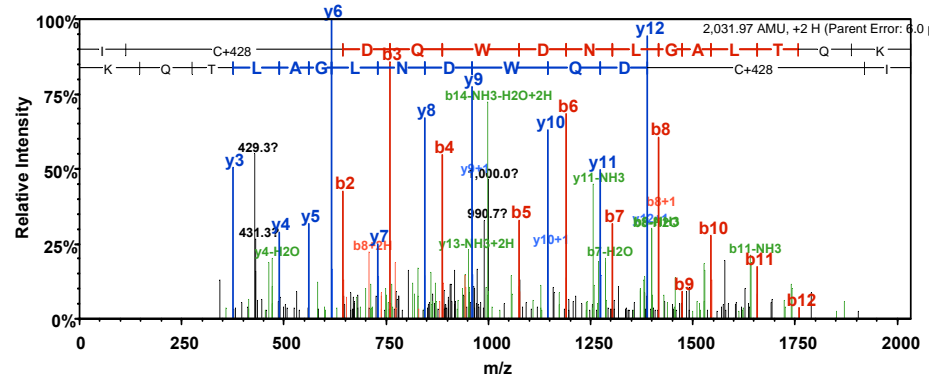

**Isoform 1 of Plectin-1 (R)EYGScSHHYQQLLSLEQGAQEESR(C)**  
**XCorr: 4.00 ΔCn: 0.48**

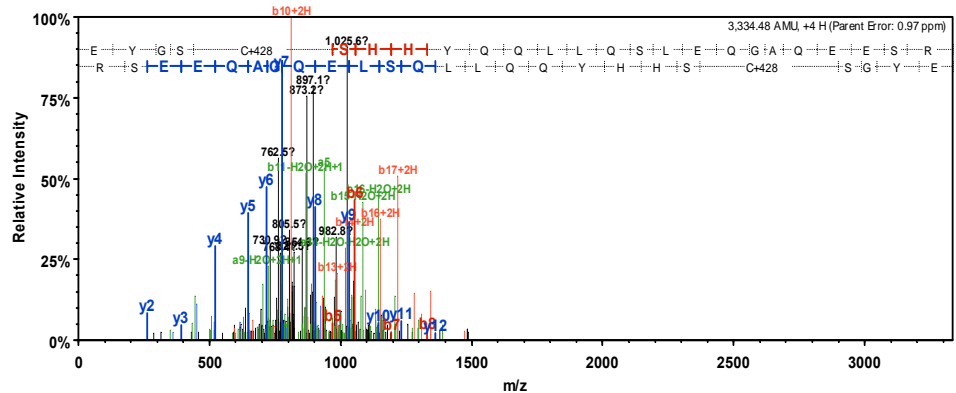

**ACTN1 alpha actinin 1 (K)cQLEINFNTLQTK(L)**  
**XCorr: 3.09 ΔCn: 0.57**

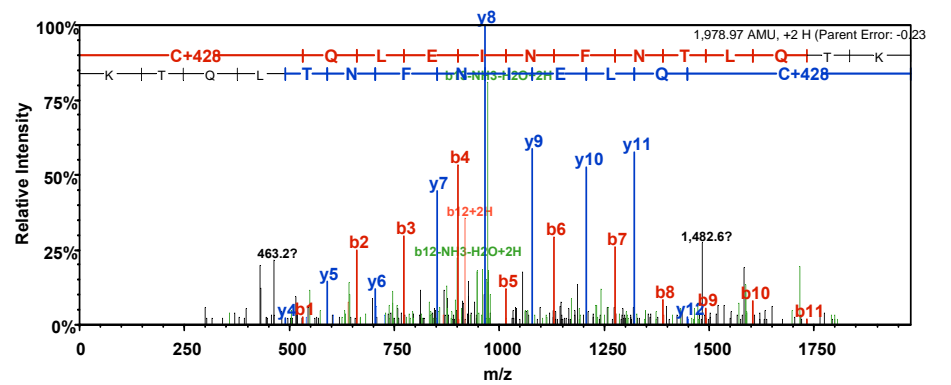

**Isoform 1 of Plectin-1 (R)LPLLAvcDYK(Q)**  
**XCorr: 2.4 ΔCn: 0.39**

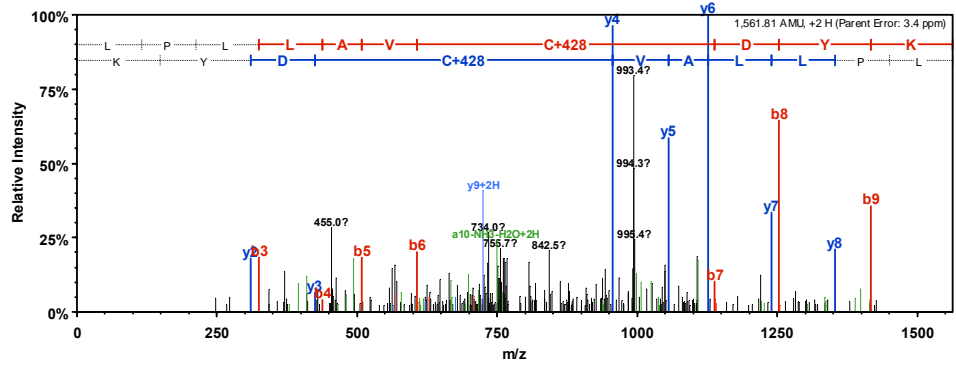

**Citrate synthase, mitochondrial (K)LPcVAAK(I)**  
**XCorr: 2.62 ΔCn: 0.35**

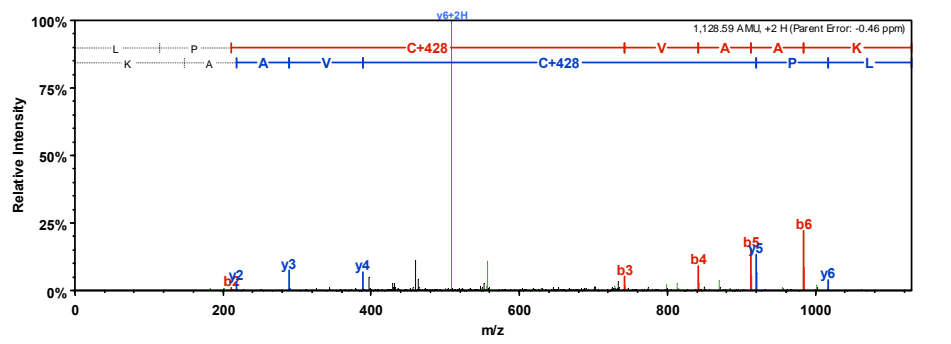

**VCP valisin-containing protein (K)GVLFYGGPPGcGK(T)**  
**XCorr: 3.39  $\Delta$ Cn: 0.59**

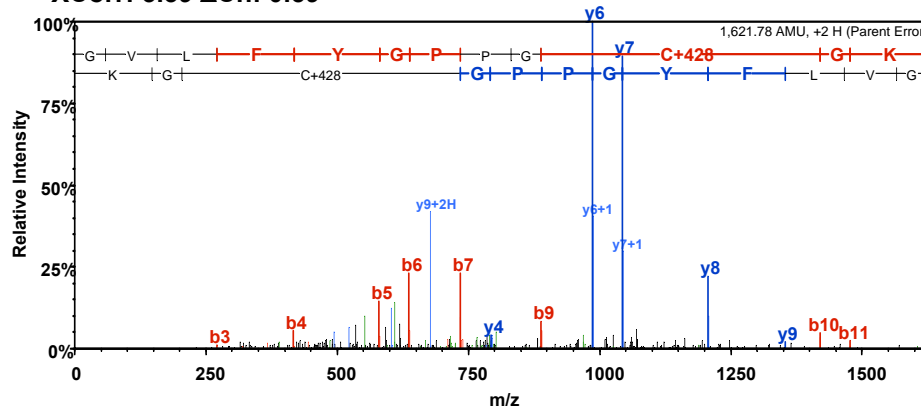

**PGK1 phosphoglycerate kinase 1(K)DcVGPEVEK(A)**  
**XCorr: 2.14  $\Delta$ Cn: 0.39**

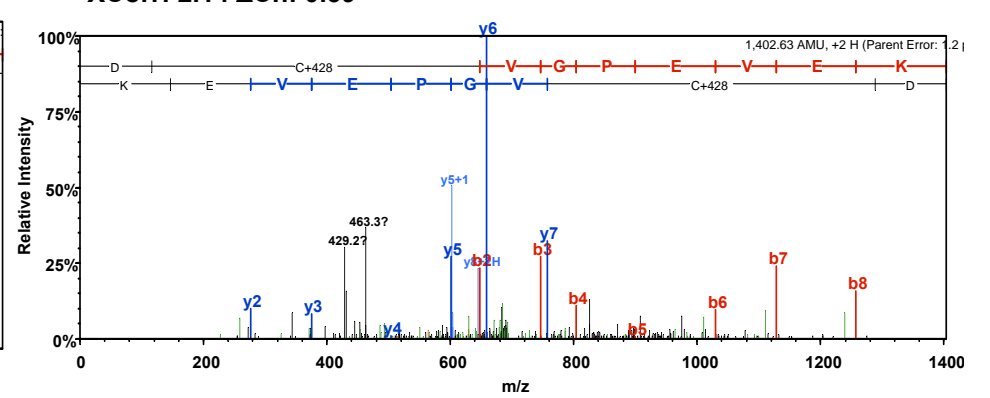

**VCP valisin-containing protein (R)LGDVISIQPcPDVK(Y)**  
**XCorr: 3.75  $\Delta$ Cn: 0.6**

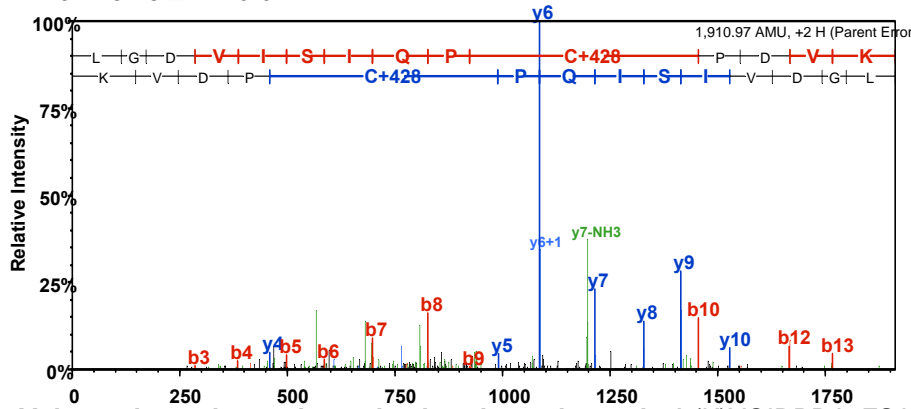

**PGK1 phosphoglycerate kinase 1 (K)AcANPAAGSVILLENLR(F)**  
**XCorr: 5.16  $\Delta$ Cn: 0.57**

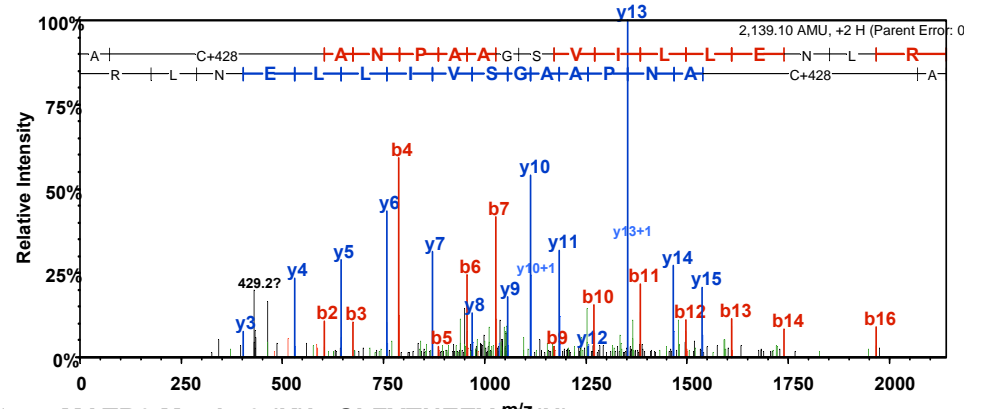

**Voltage-dependent anion-selective channel protein 1 (K)YQIDPDAcFSAK**  
**XCorr: 3.23  $\Delta$ Cn: 0.53**

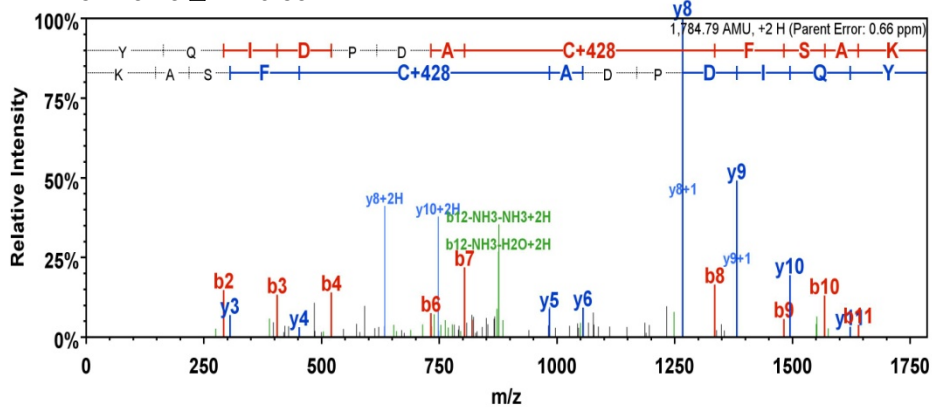

**MATR3 Matrin 3 (K)LcSLFYTNEEVAK(N)**  
**XCorr: 3.43  $\Delta$ Cn: 0.59**

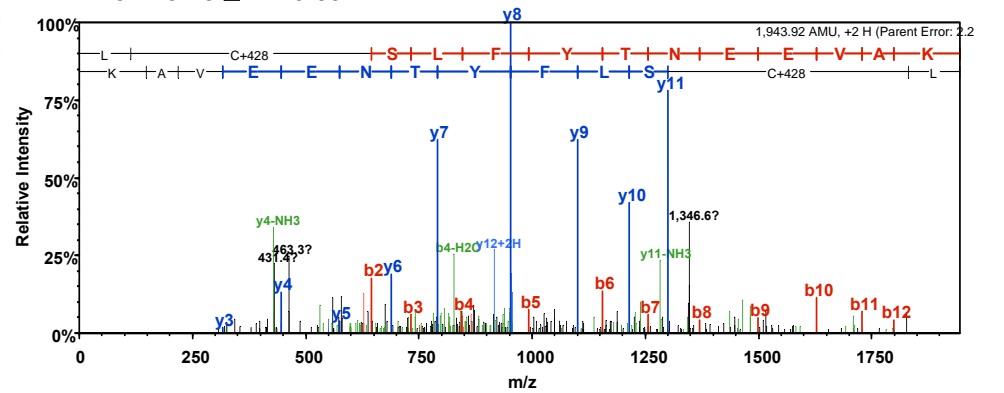

**Heterogeneous nuclear ribonucleoprotein R (R)GFcFLEYEDHK(S)**  
**XCorr: 3.53 ΔCn: 0.31**

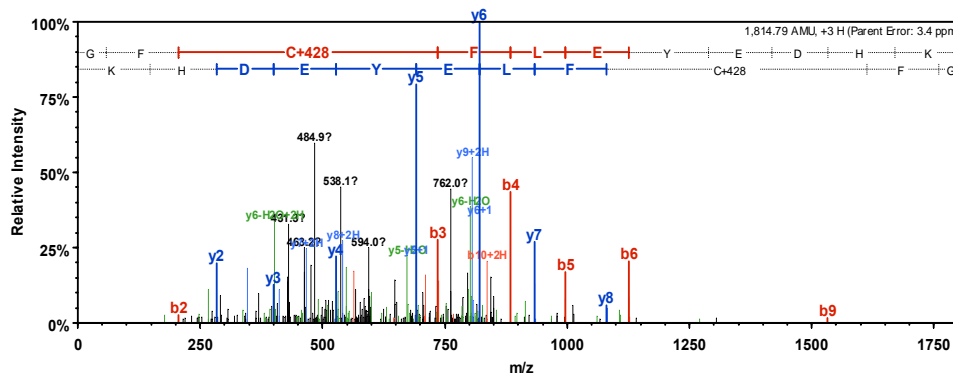

**KH-type splicing regulatory protein (K)IQQDSGcK(V)**  
**XCorr: 2.59 ΔCn: 0.33**

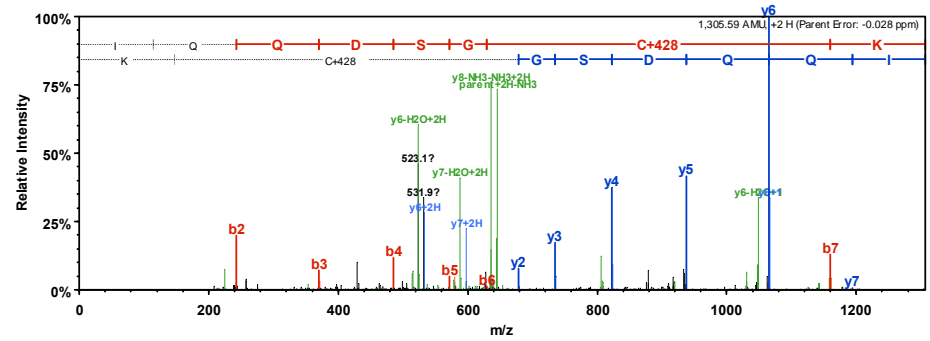

**HNRPDL (R)GFcFITYTDEEPVKK(L)**  
**XCorr: 3.62 ΔCn: 0.55**

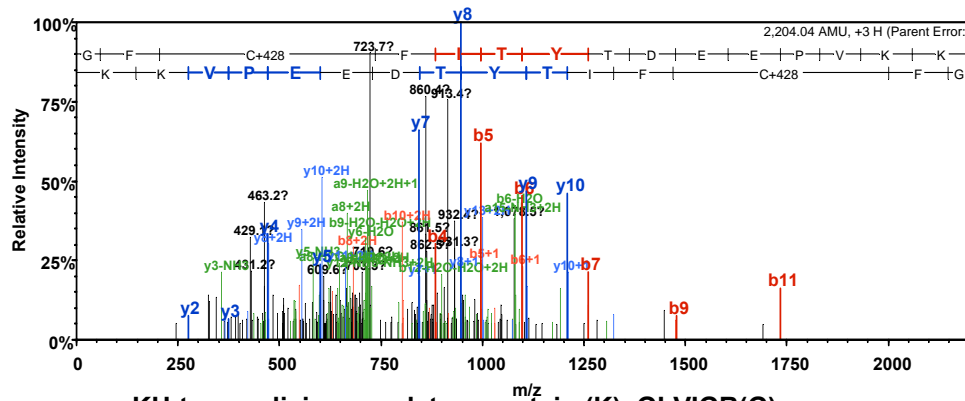

**Isoform 1 of Heterogeneous nuclear ribonucleoprotein M (K)DKFNEcGHVLYADIK(M)**  
**XCorr: 2.79 ΔCn: 0.36**

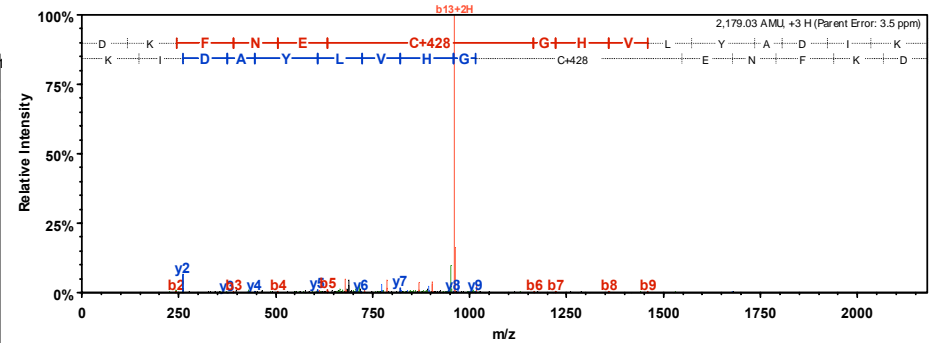

**KH-type splicing regulatory protein (K)cGLVIGR(G)**  
**XCorr: 2.02 ΔCn: 0.18**

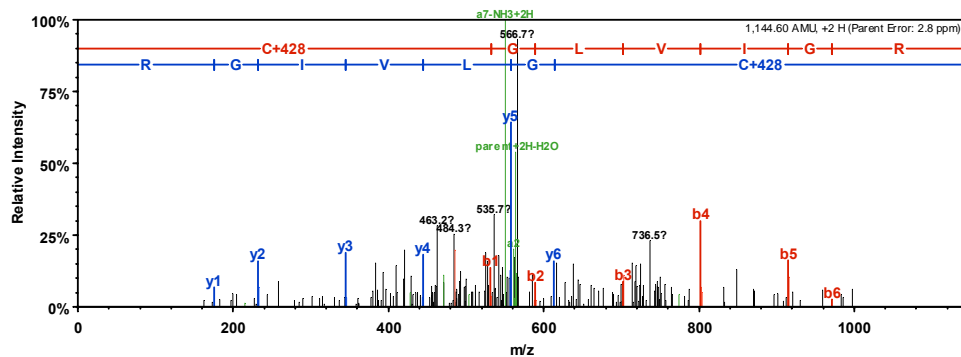

**P4HB(K)KEEcPAVR(L)**  
**XCorr: 2.5896 ΔCn: 0.3136**

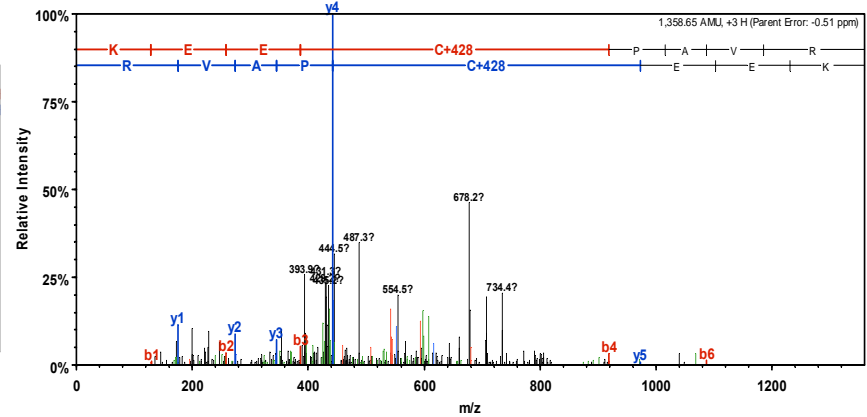

**Protein disulfide-isomerase A3 (K)KFIQENIFGICPhMTEDNKDLIQGK(D)**  
**XCorr: 4.81 ΔCn: 0.53**

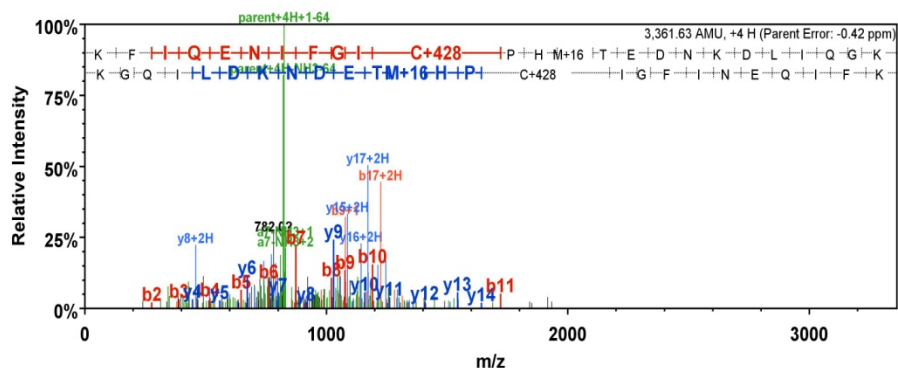

**HSPA8 Heat shock 70 kDa protein 8 (K)VcNPIITK(L)**  
**XCorr: 2.56 ΔCn: 0.35**

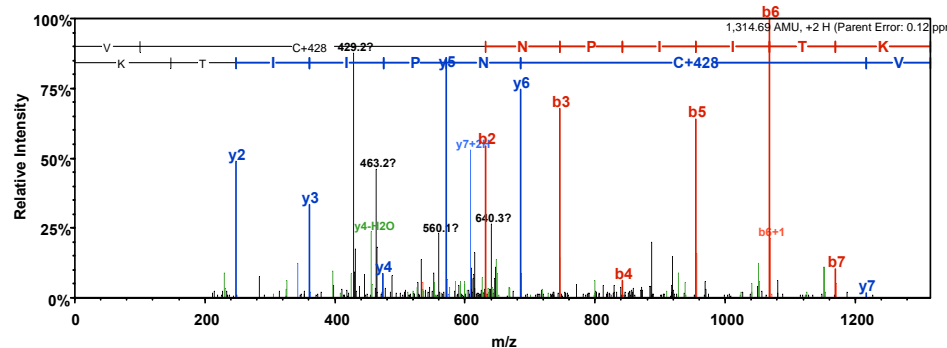

**60 kDa heat shock protein, mitochondrial (K)cEFQDAYVLLSEK(K)**  
**XCorr: 4.14 ΔCn: 0.52**

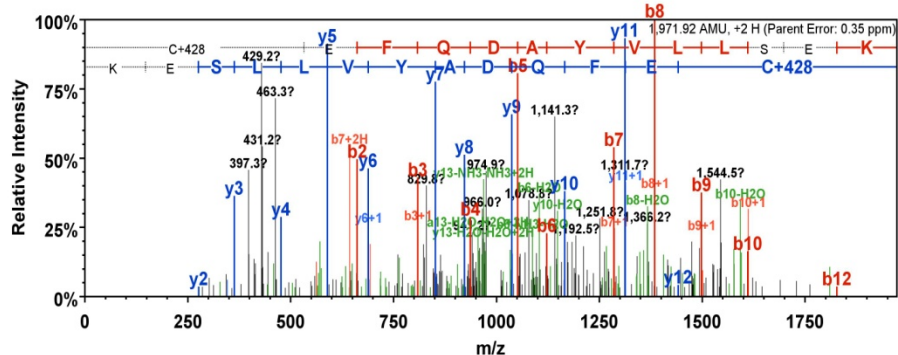

**Isoform 1 of Heat shock cognate 71 kDa protein (K)cNEIINWLDK(N)**  
**XCorr: 3.17 ΔCn: 0.31**

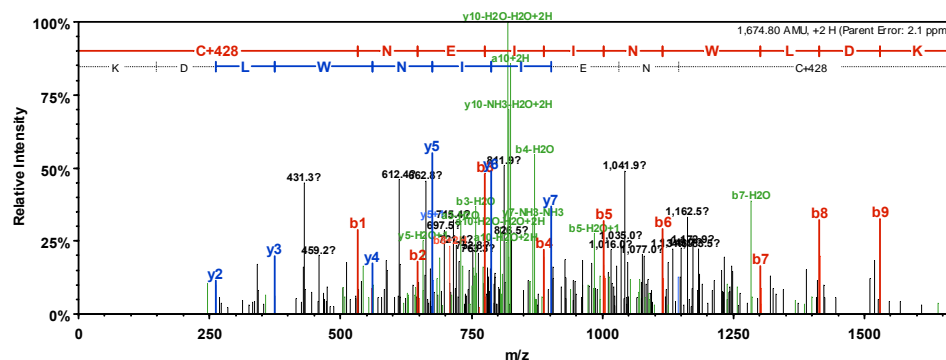

**60 kDa heat shock protein, mitochondrial (K)cEFQDAYVLLSEK(K)**  
**XCorr: 2.97 ΔCn: 0.51**

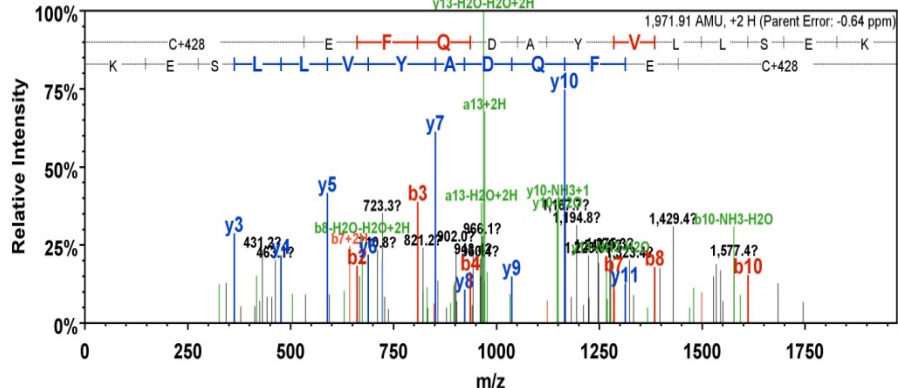

**Isoform 1 of Heat shock cognate 71 kDa protein (K)cNEIINWLDKNQTAEKEEFHQK(E)**  
**XCorr: 3.21 ΔCn: 0.20**

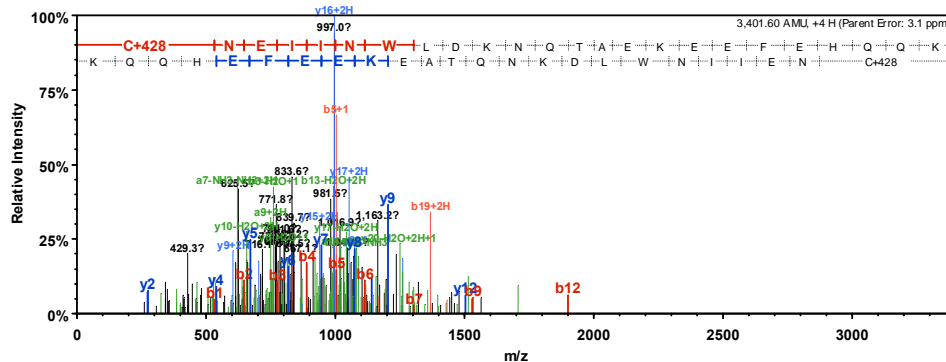

**HSPA9 Heat shock 70 kDa protein 9 Mortalin (K)MEEFKDQLPADEcNK(L)**

**XCorr: 3.04 ΔCn: 0.33**

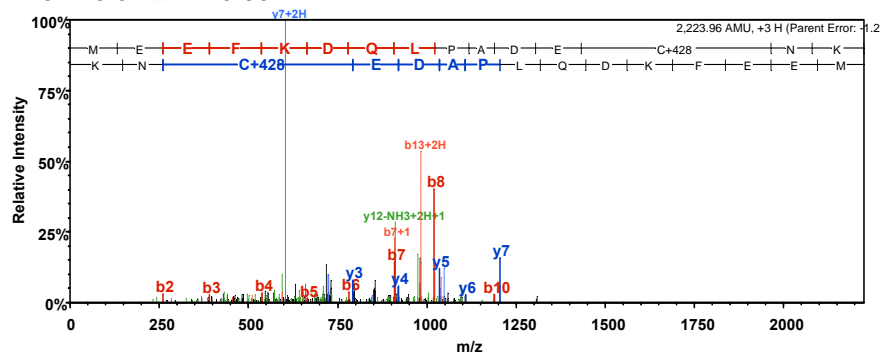

**Annexin A1 (K)mYGISLcQAILDETKGDYEk(I)**

**XCorr: 3.2 ΔCn: 0.58**

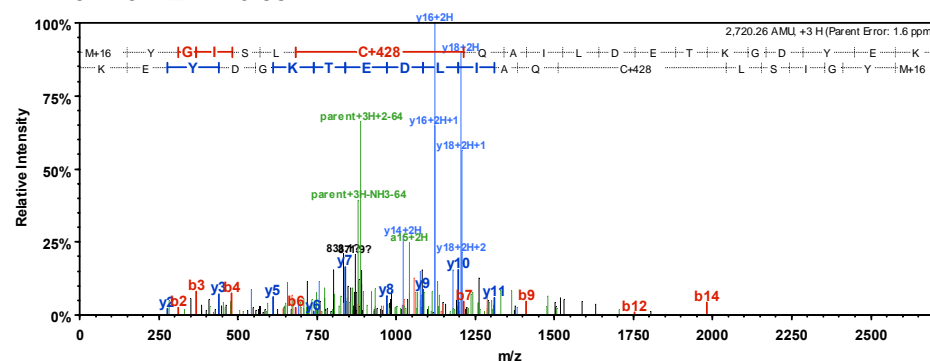

**ANXA1 Annexin A1 (K)mYGISLcQAILDETKGDYEk(I)**

**XCorr: 3.24 ΔCn: 0.58**

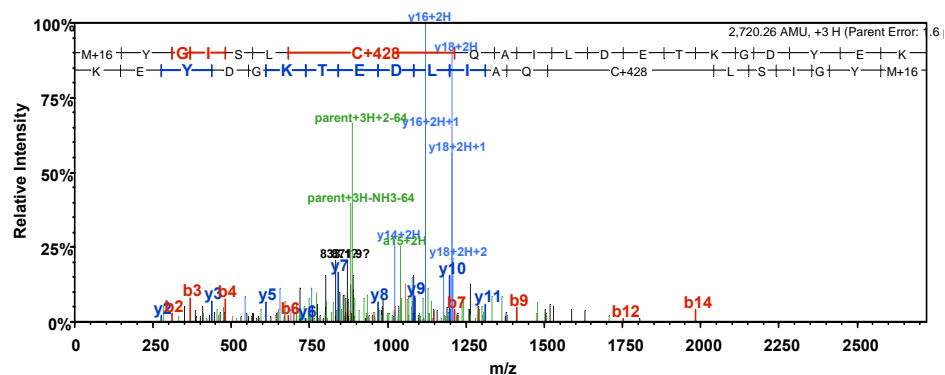

**FLNA (K)ATcAPQHGAPGPGPADASK(V)**

**XCorr: 3.6437 ΔCn: 0.5176**

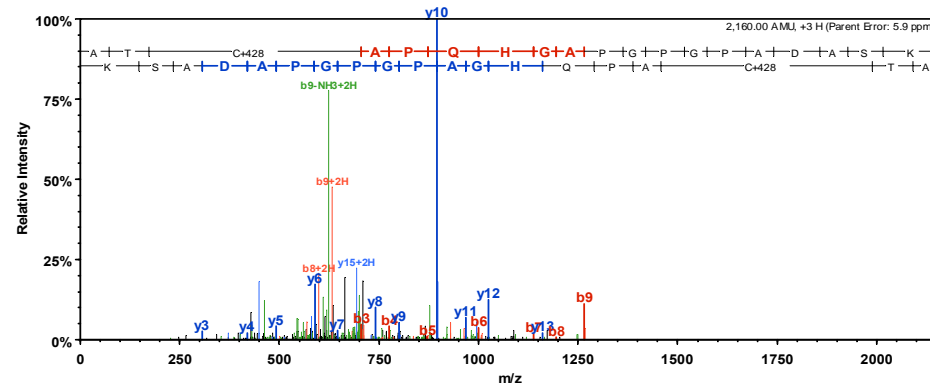

**Annexin A1 (K)ILVALcGGN(-)**

**XCorr: 2.19 ΔCn: 0.48**

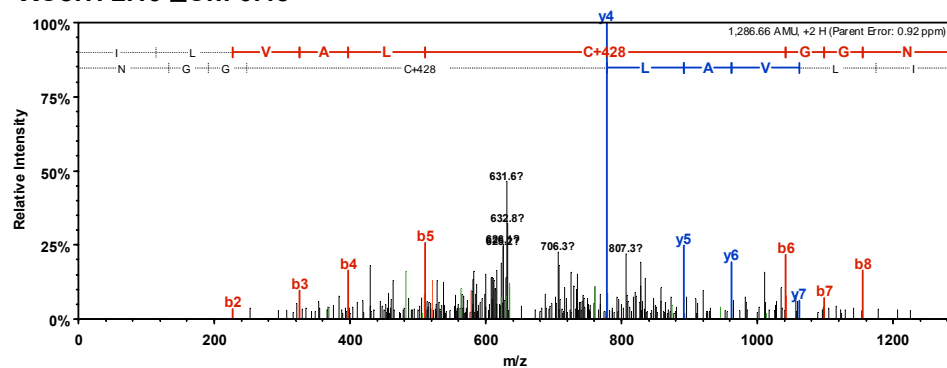

**FLNA (K)cAPGVVGPAEADIDFDIIR(N)**

**XCorr: 3.603 ΔCn: 0.3647**

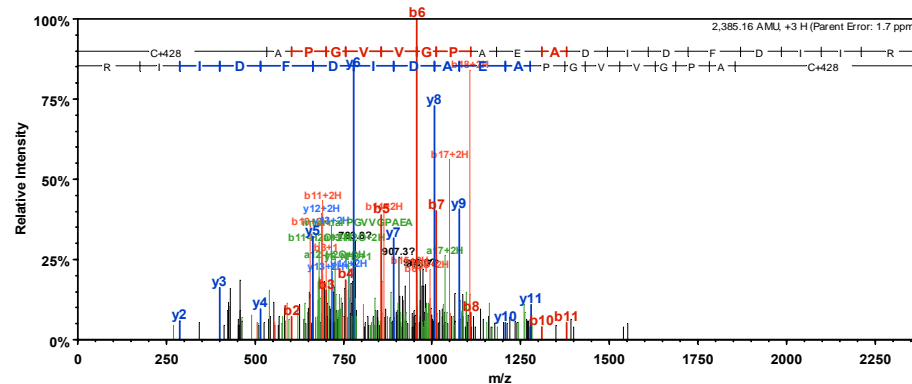

**FLNA(K)LQVEPAVDTSGVQcYGP GIEGQGVFR(E)**  
XCorr: 3.9361  $\Delta$ Cn: 0.5732

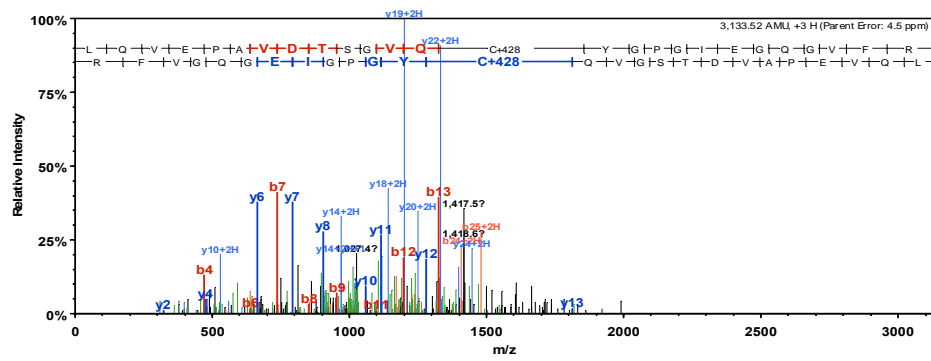

**FLNB(K)VAVTEGcQPSR(V)**  
XCorr: 2.456  $\Delta$ Cn: 0.4749

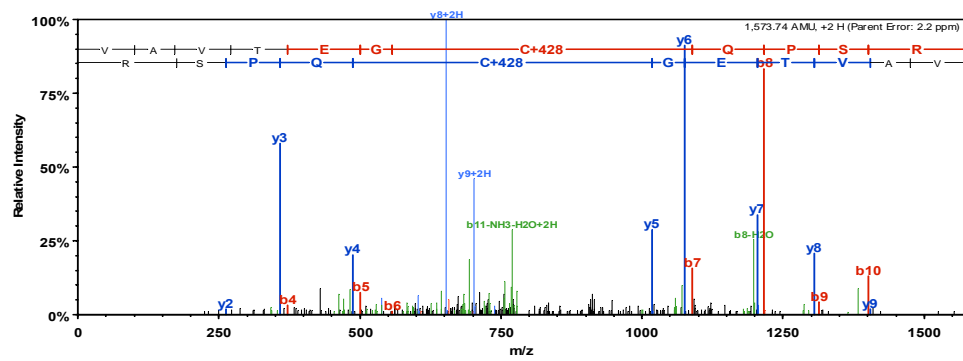



# Supporting Information: (MS/MS spectra for biotinylated peptides in Table S1B)

**Isoform 2 of Voltage-dependent anion-selective channel protein 2**  
**(K)ScSGVEFSTSGSSNTDTGK(V)**  
**XCorr: 4.56 ΔCn: 0.67**

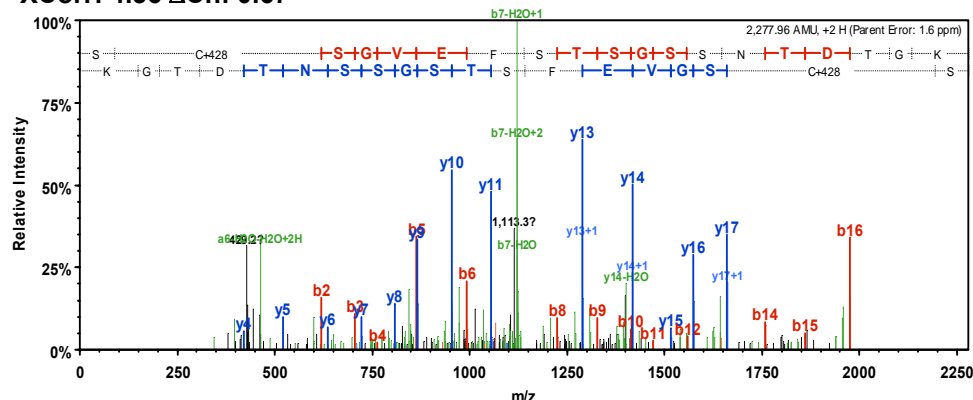

**Isoform SERCA2A of Sarcoplasmic/endoplasmic reticulum calcium ATPase 2**  
**(R)cLALATHDNPLR(R)**  
**XCorr: 4.23 ΔCn: 0.51**

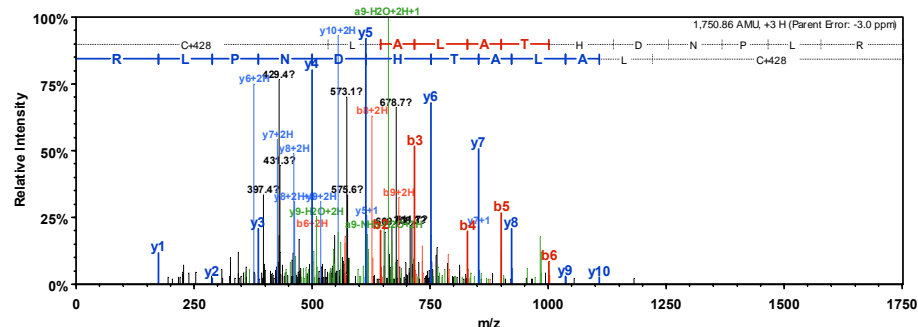

**Isoform 1 of Voltage-dependent anion-selective channel protein 3**  
**(K)VcNYGLTFTQK(W)**  
**XCorr: 2.44 ΔCn: 0.21**

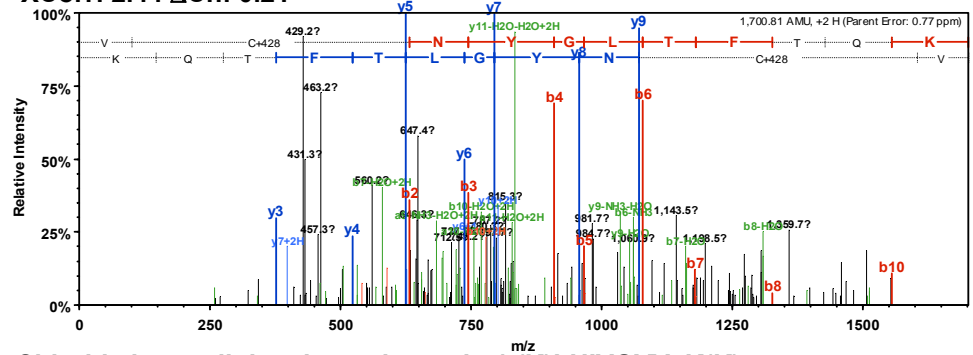

**Isoform Mitochondrial of Peroxiredoxin-5, mitochondrial**  
**(K)GVLFVPGAFTPGcSK(T)**  
**XCorr: 2.78 ΔCn: 0.30**

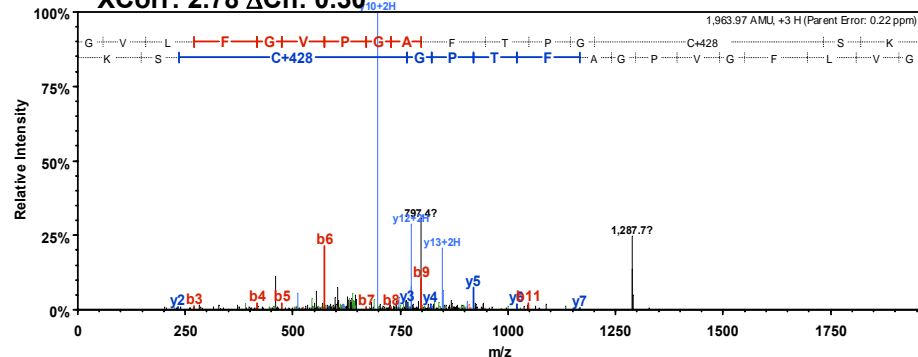

**Chloride intracellular channel protein 1 (K)LHIVQVVcK(K)**  
**XCorr: 2.51 ΔCn: 0.46**

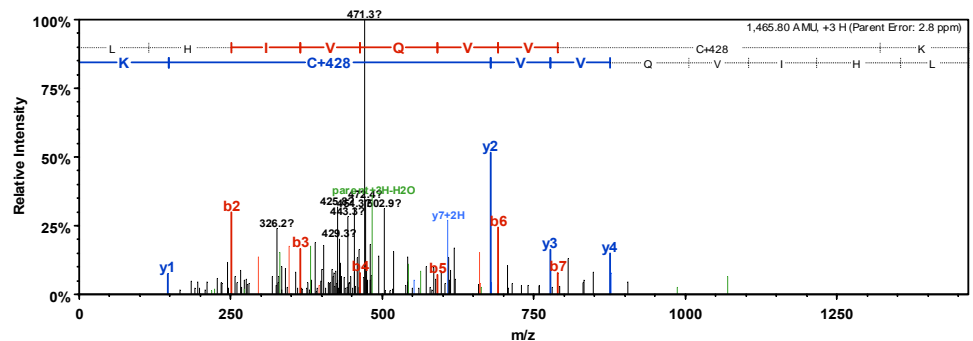

**PRDX1(K)HGEVcPAGWKPGSDTIKPDVQK(S)**  
**XCorr: 3.4631 ΔCn: 0.4084**

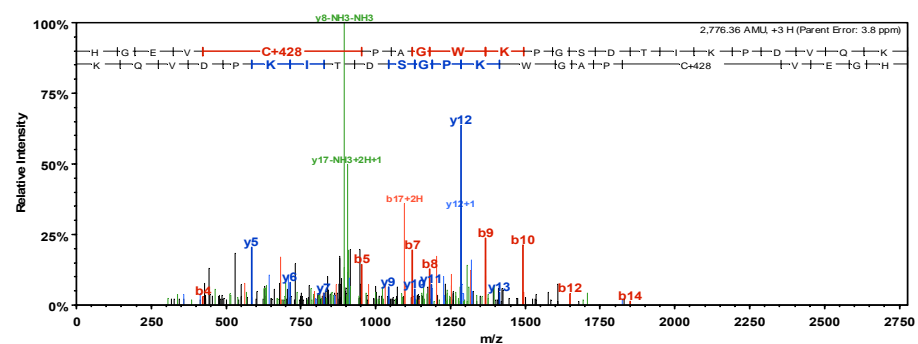

**Peroxiredoxin-1 (K)HGEVcPAGWK(P)**

**XCorr: 3.24 ΔCn: 0.49**

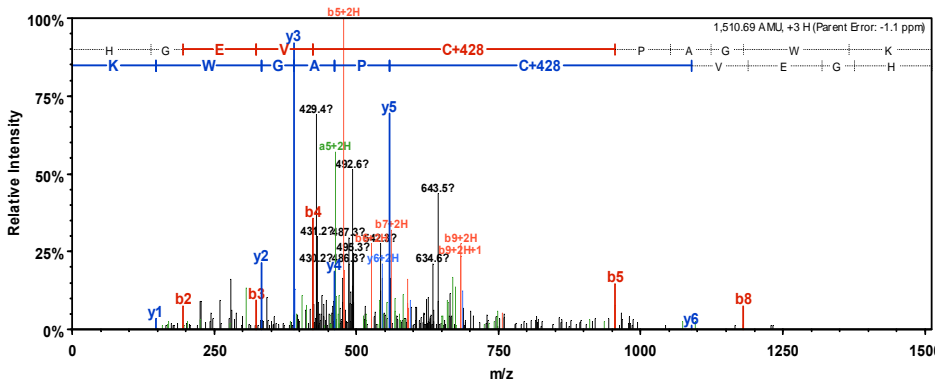

**Neuroblast differentiation-associated protein AHNAK**

**(K)GPFVEAEVDPVDLEcPDAK(L)**

**XCorr: 2.90 ΔCn: 0.33**

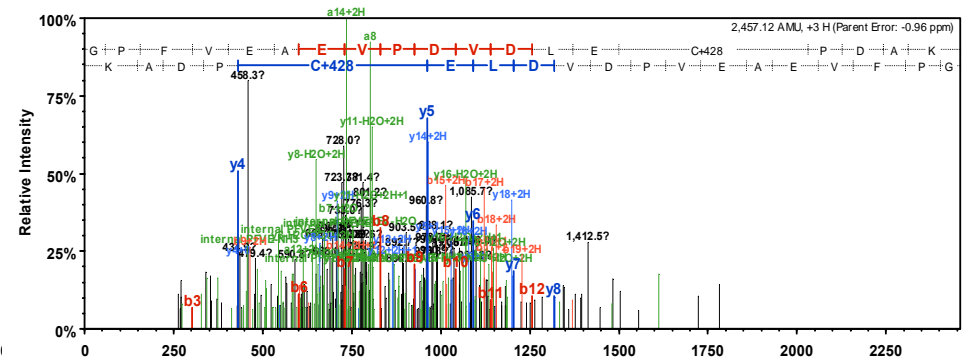

**RNH1 ribonuclease/angiogenin inhibitor (K)LGDVGMAELcPGLLHPSSR(L)**

**XCorr: 3.25 ΔCn: 0.56**

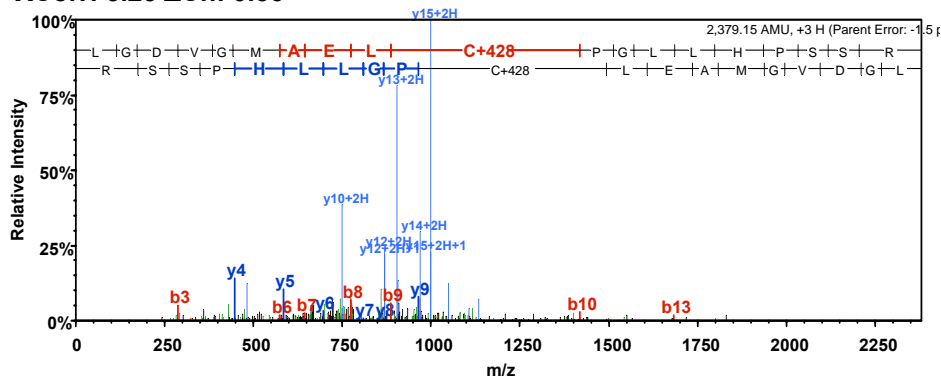

**Neuroblast differentiation-associated protein AHNAK**

**(K)VDVEcPDVNIPEGEGK(W)**

**XCorr: 3.76 ΔCn: 0.56**

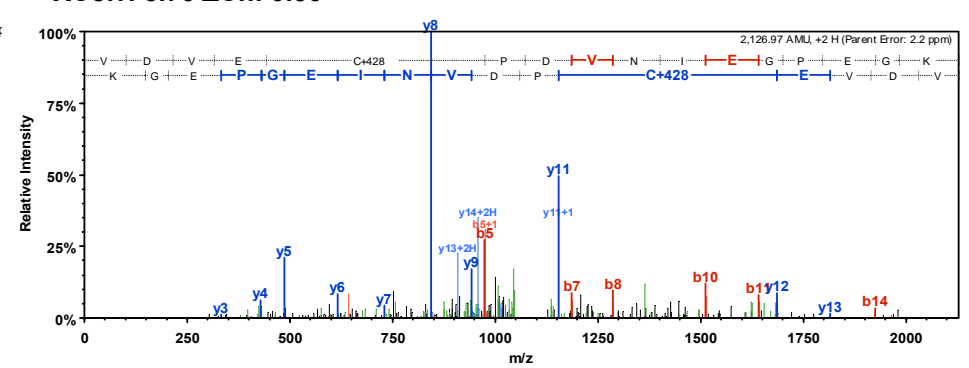

**RNH1 ribonuclease/angiogenin inhibitor (R)LDDcGLTEAR(C)**

**XCorr: 2.88 ΔCn: 0.41**

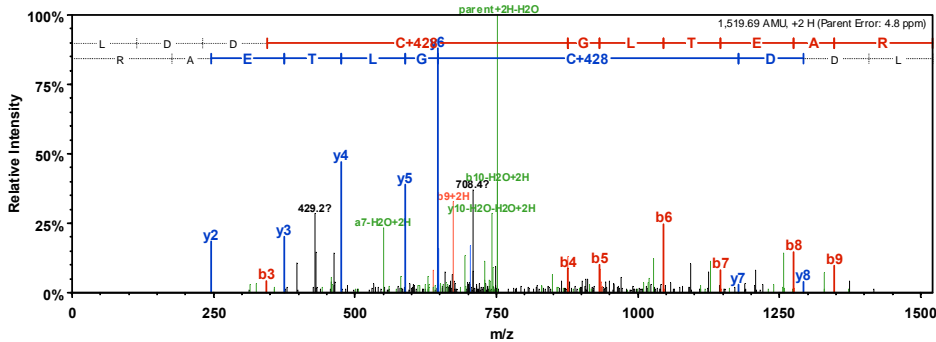

**Neuroblast differentiation-associated protein AHNAK**

**(K)LEGDLTGPSVGVDPDVELEcPDAK(L)**

**XCorr: 4.49 ΔCn: 0.48**

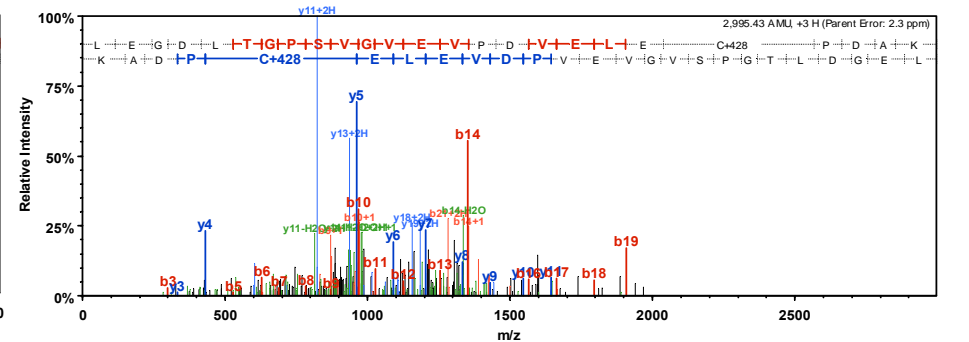

**RPLP0 ribosomal protein, large, P0 (K)cFIVGADNVGSK(Q)**  
XCorr: 2.97  $\Delta$ Cn: 0.53

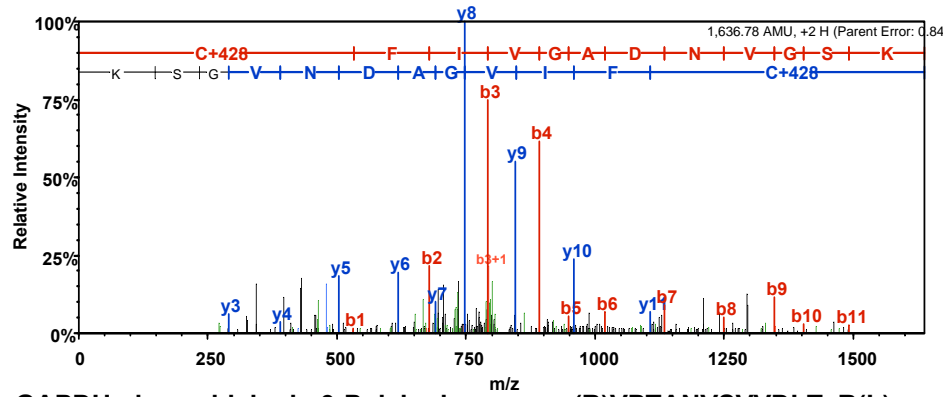

**Isoform 1 of Cytoskeleton-associated protein 4 (K)SSSSSSASAAAAAASSSAScSR(R)**  
XCorr: 3.88  $\Delta$ Cn: 0.60

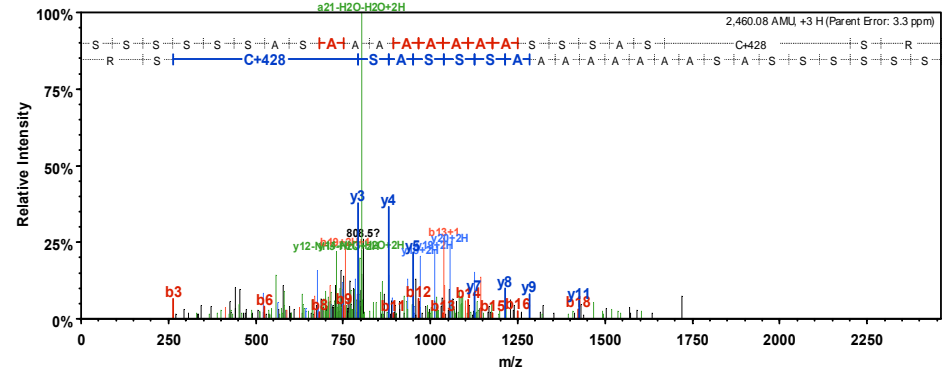

**GAPDH glyceraldehyde-3-P dehydrogenase (R)VPTANVSVVDLTcR(L)**  
XCorr: 4.11  $\Delta$ Cn: 0.65

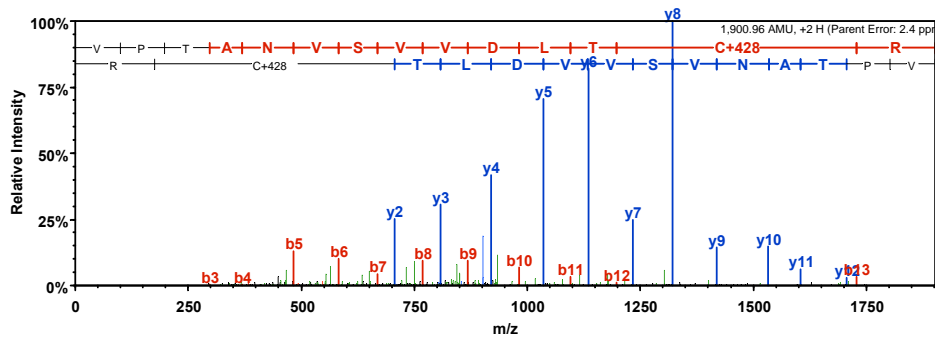

**Isoform Alpha-6X1X2B of Integrin alpha-6 (K)ScFEYTANPAGYNPSISIVGTLEAEK(E)**  
XCorr: 3.53  $\Delta$ Cn: 0.34

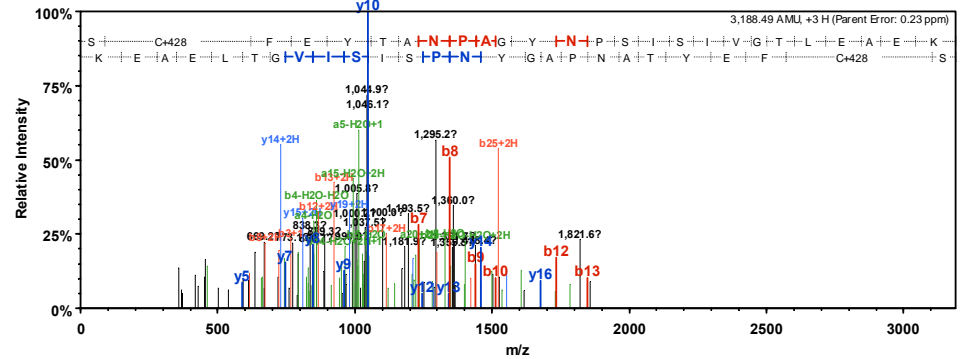

**GAPDH glyceraldehyde-3-P dehydrogenase (K)IISNAScTTNcLAPLAK(V)**  
XCorr: 2.67  $\Delta$ Cn: 0.3

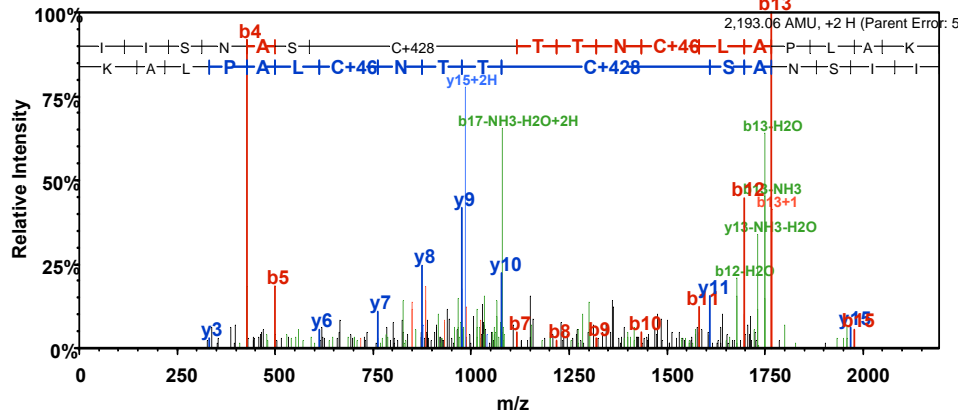

**Heme oxygenase 2 (K)GALEGSScPFR(T)**  
XCorr: 2.33  $\Delta$ Cn: 0.32

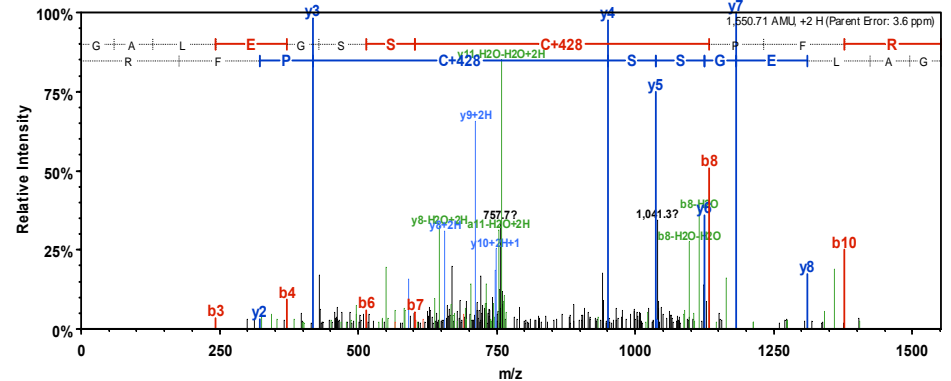

**Galectin-1 (R)FNAHGDANTIVcNSK(D)**

**XCorr: 3.67  $\Delta$ Cn: 0.66**

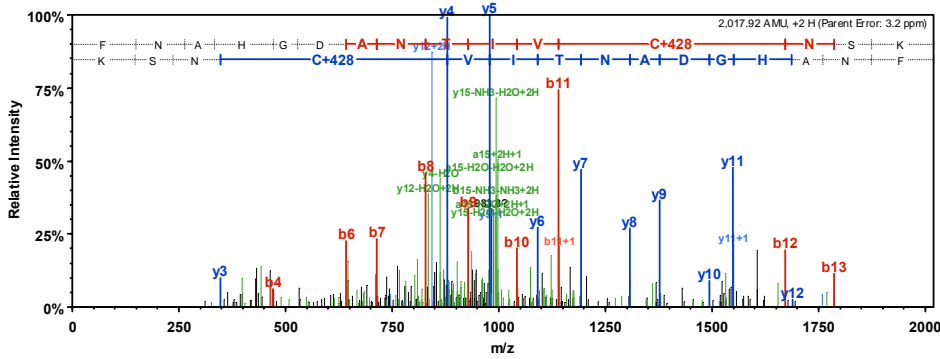

**Alpha-actinin-4 (K)AcLISLGYDVENDR(Q)**

**XCorr: 3.22  $\Delta$ Cn: 0.66**

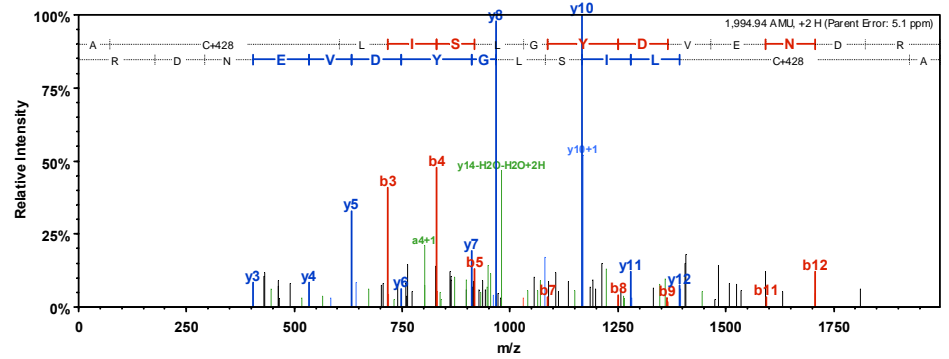

**Galectin-1 (K)DSNNLcLHFNPR(F)**

**XCorr: 3.00  $\Delta$ Cn: 0.40**

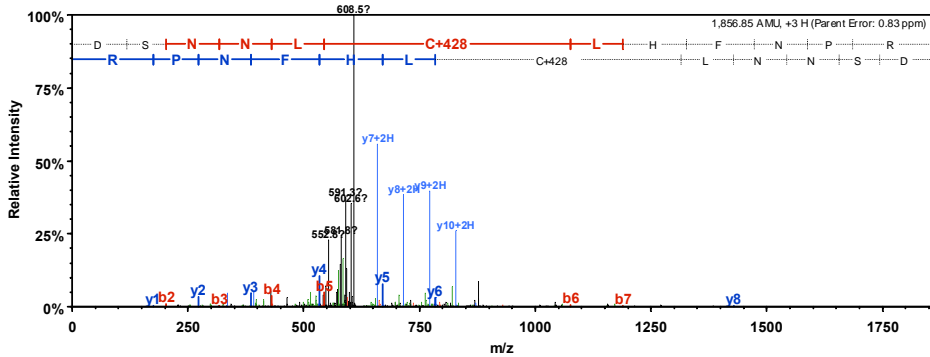

**Isoform 1 of Filamin-C (K)GAGTGGGLGLTVEGPcEAK(I)**

**XCorr: 2.54  $\Delta$ Cn: 0.41**

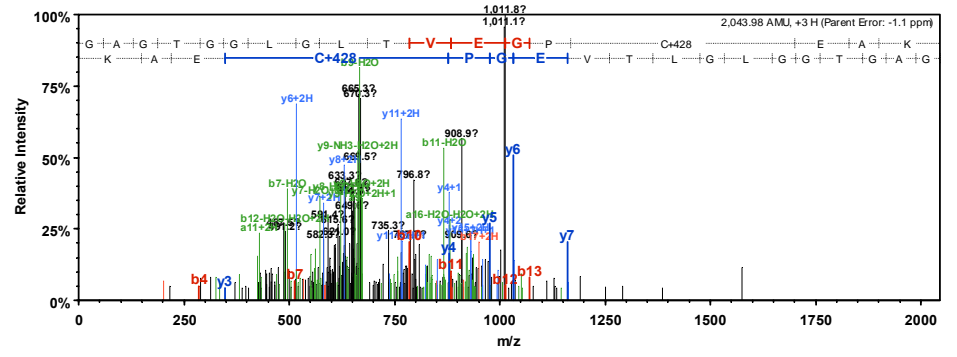

**Alpha-actinin-4 (K)IcDQWDALGSLTHSR(R)**

**XCorr: 5.37  $\Delta$ Cn: 0.64**

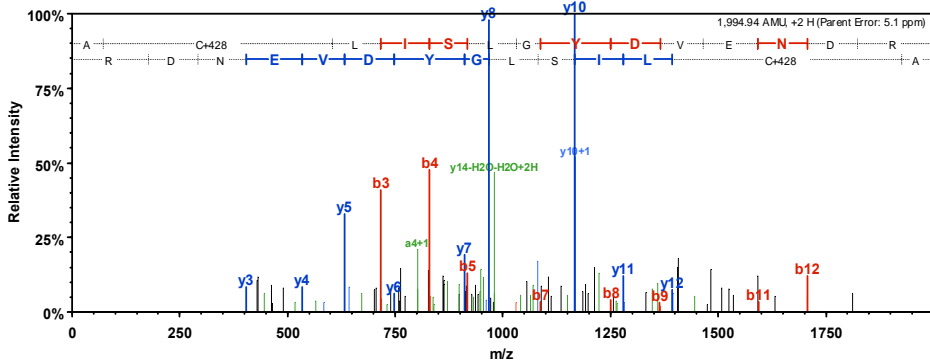

**XRCC5(K)ETVYcLNDDETEVLKEDIQGR(Y)**

**XCorr: 4.81  $\Delta$ Cn: 0.65**

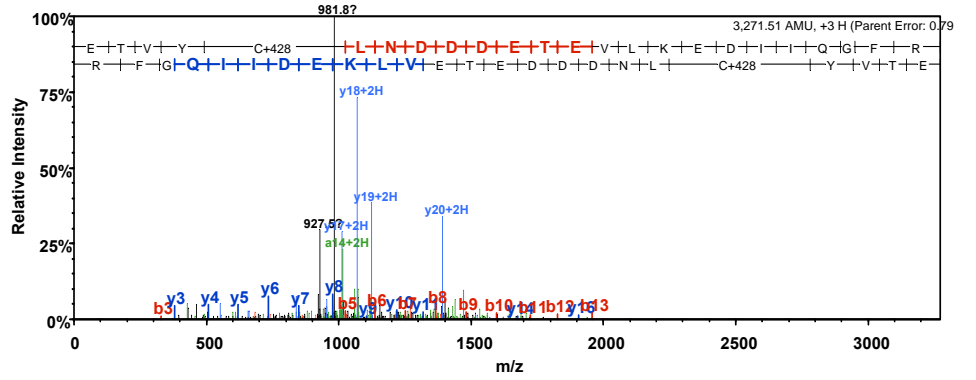

**ATP-dependent DNA helicase 2 subunit 2 (R)LFQcLLHR(A)**

**XCorr: 2.3  $\Delta$ Cn: 0.35**

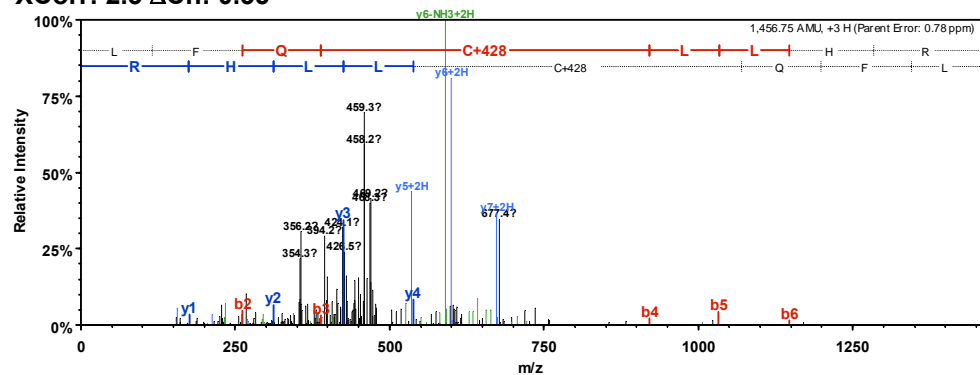

**ALDOA aldolase A (R)ALANSLAcQGK(Y)**

**XCorr: 3.08  $\Delta$ Cn: 0.57**

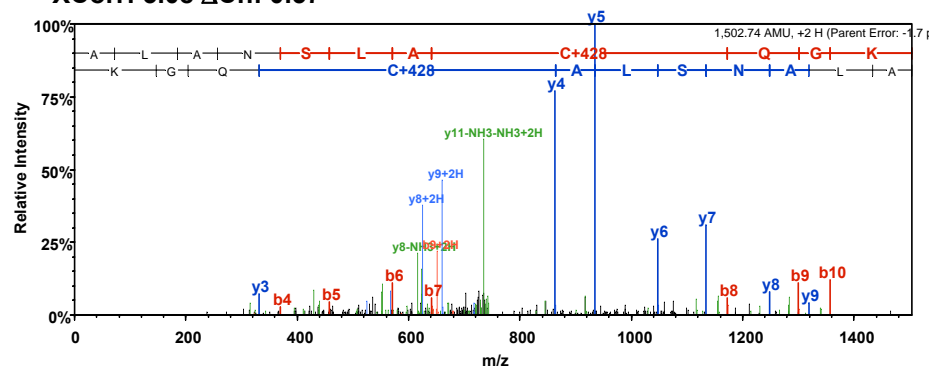

**PCNA (K)cAGNEDIITLR(A)**

**XCorr: 3.68  $\Delta$ Cn: 0.57**

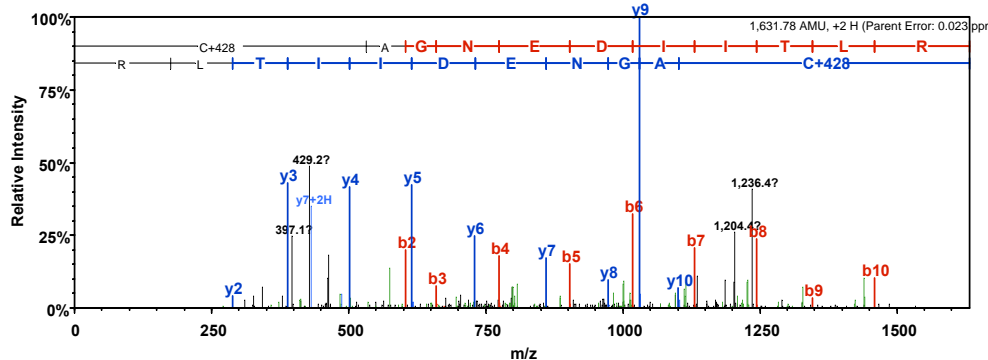

**ALDOA aldolase A (R)VNPcIGGVILFHETLYQK(A)**

**XCorr: 3.59  $\Delta$ Cn: 0.46**

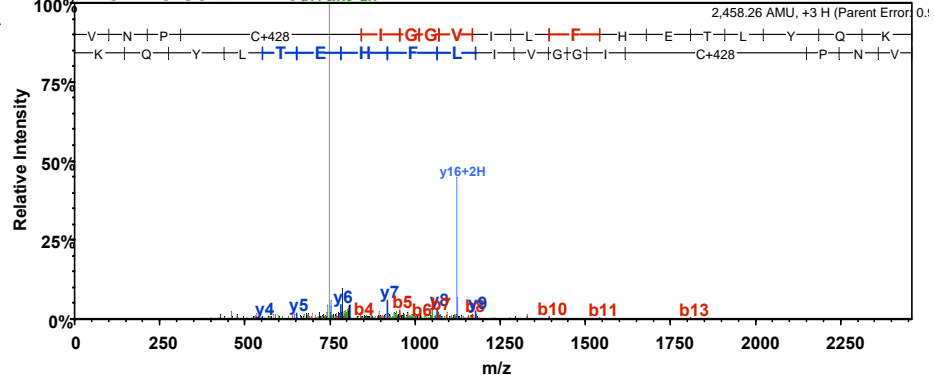

**PCNA (R)DLSHIGDAVVIScAK(D)**

**XCorr: 3.63  $\Delta$ Cn: 0.57**

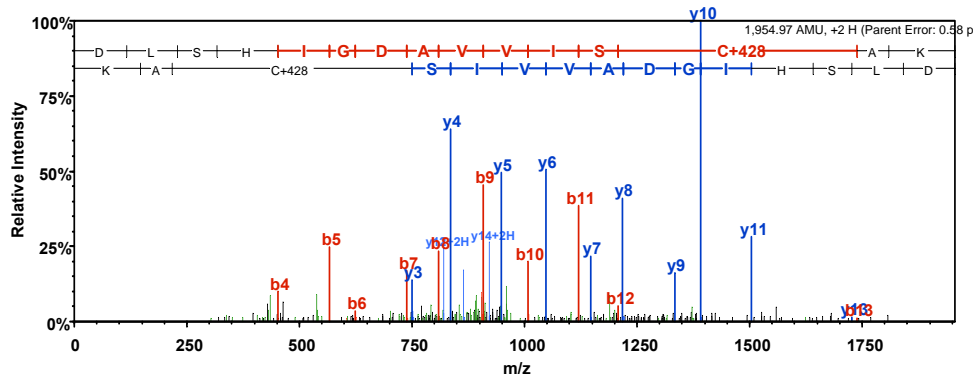

**Fructose-bisphosphate aldolase A (R)ALANSLAcQGK(Y)**

**XCorr: 2.67  $\Delta$ Cn: 0.43**

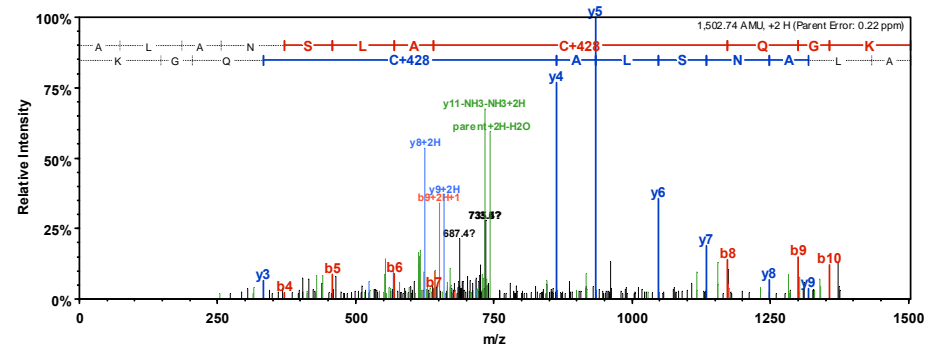

**Isoform M1 of Pyruvate kinase isozymes M1/M2 (R)NTGIICIGPASR(S)**  
**XCorr: 3.09  $\Delta$ Cn: 0.35**

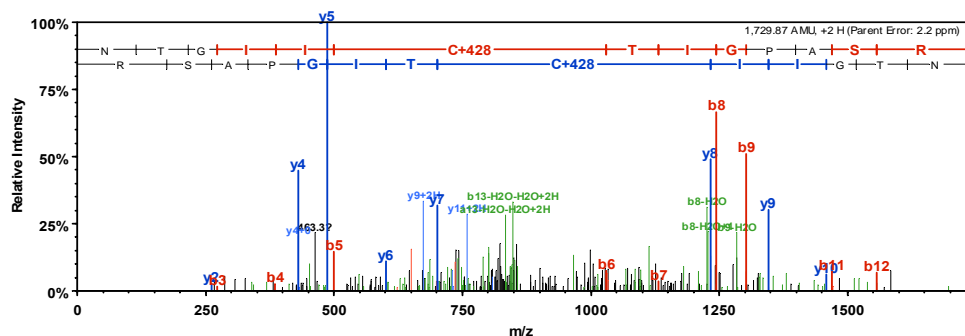

**Isoform M1 of Pyruvate kinase isozymes M1/M2 (R)AEGSDVANAVLDGADcIMLSGETAK(G)**  
**XCorr: 3.77  $\Delta$ Cn: 0.57**

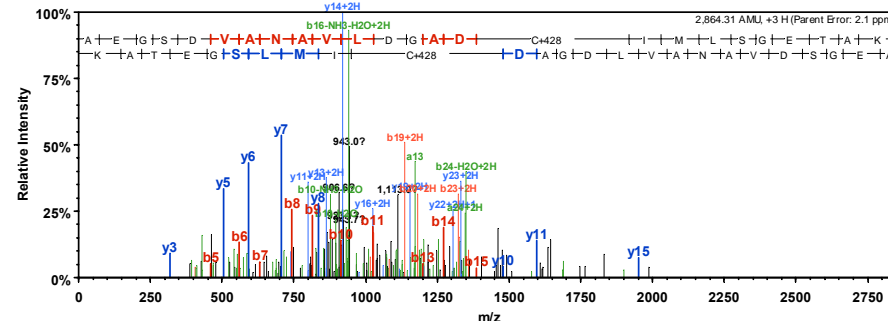

**Isoform M1 of Pyruvate kinase isozymes M1/M2 (R)AGKPVICATQmLESmIK(K)**  
**XCorr: 4.08  $\Delta$ Cn: 0.57**

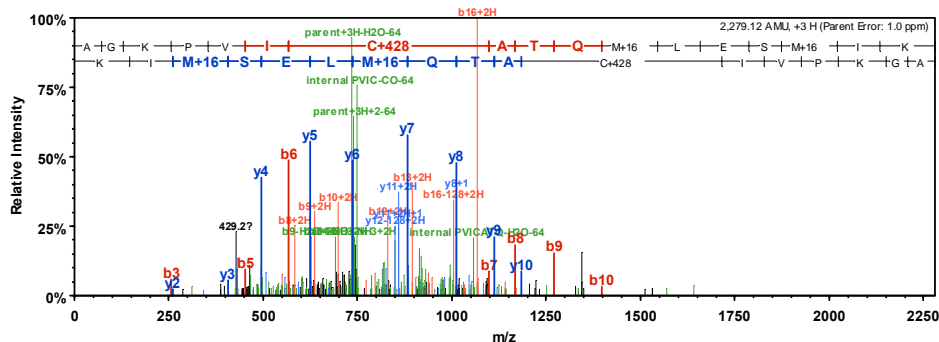

**Isoform M1 of Pyruvate kinase isozymes M1/M2 (K)cDENILWLDYK(N)**  
**XCorr: 2.22  $\Delta$ Cn: 0.44**

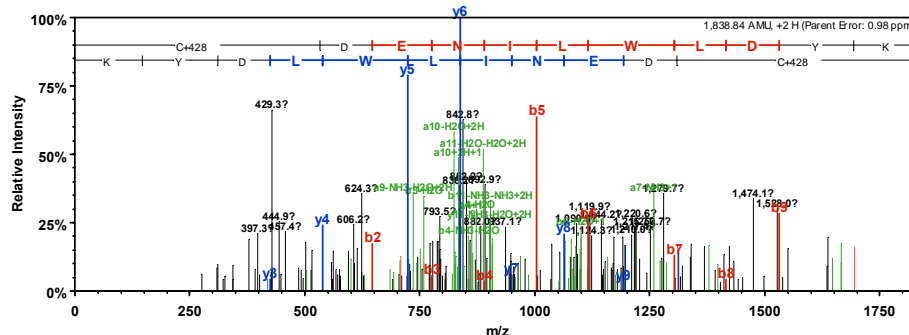

**Isoform M1 of Pyruvate kinase isozymes M1/M2 (K)PVICATQMLESMIK(K)**  
**XCorr: 3.51  $\Delta$ Cn: 0.60**

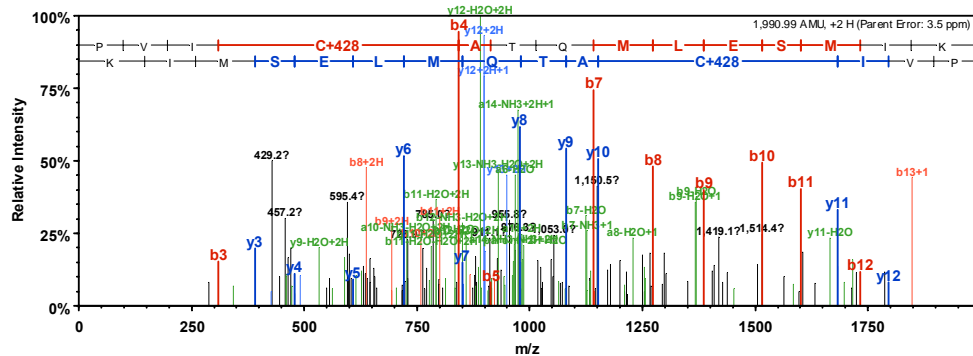

**Isoform M1 of Pyruvate kinase isozymes M1/M2 (R)AGKPVICATQMLESmIK(K)**  
**XCorr: 4.46  $\Delta$ Cn: 0.57**

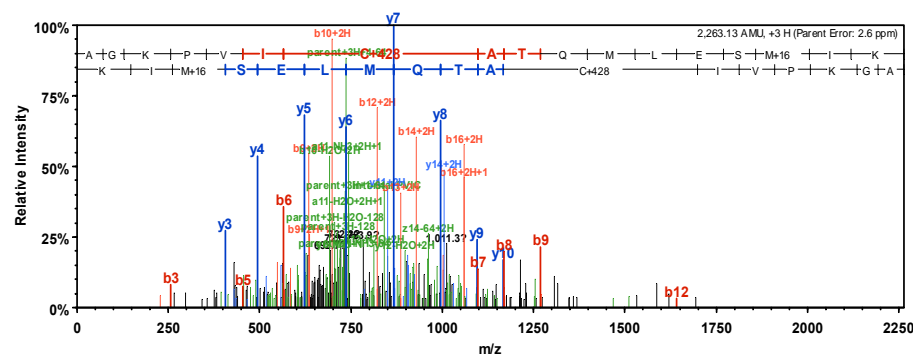

**Inosine-5'-monophosphate dehydrogenase 2**  
(R)DIDFLKEEEHDcFLEEImTK(R)

XCorr: 3.59 ΔCn: 0.36

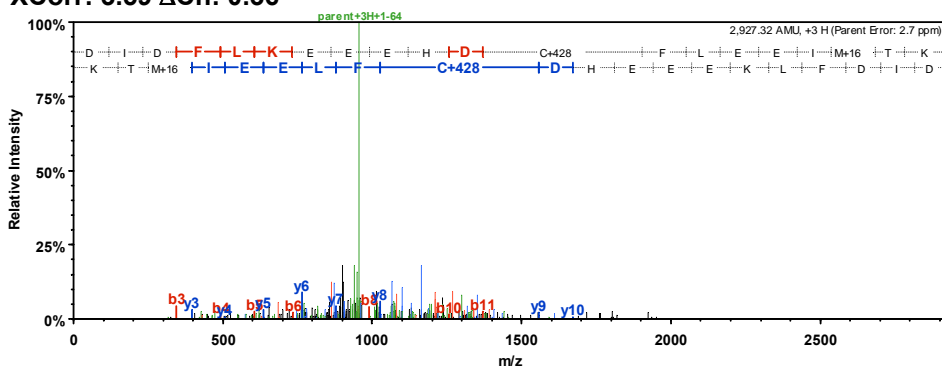

**Aconitate hydratase, mitochondrial (K)cTTDHISAAGPWLK(F)**

XCorr: 3.86 ΔCn: 0.46

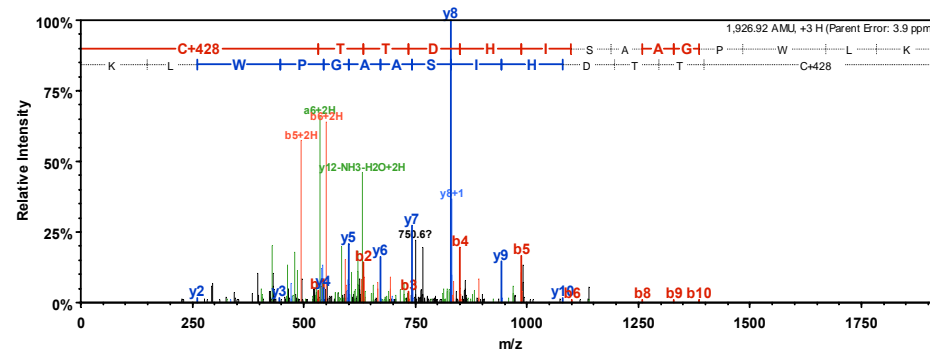

**Glucose-6-phosphate isomerase (K)MIPcDFLIPVQTQHPIR(K)**

XCorr: 2.84 ΔCn: 0.38

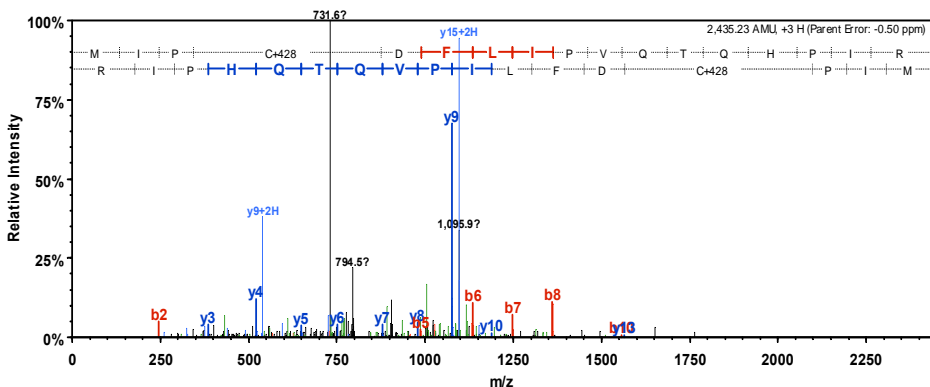

**Tubulin alpha-4A chain (R)AVcMLSNTTAIAEAWAR(L)**

XCorr: 4.61 ΔCn: 0.55

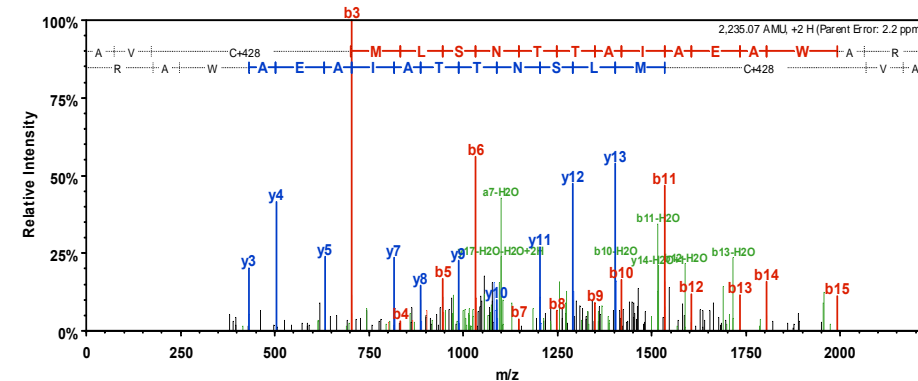

**Glucose-6-phosphate isomerase (K)MIPcDFLIPVQTQHPIR(K)**

XCorr: 3.14 ΔCn: 0.37

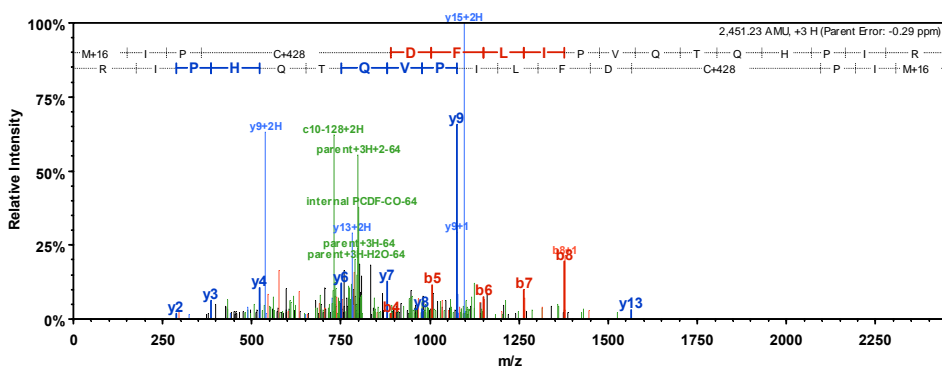

**Malate dehydrogenase, mitochondrial (K)GYLGPEQLPDcLK(G)**

XCorr: 2.46 ΔCn: 0.50

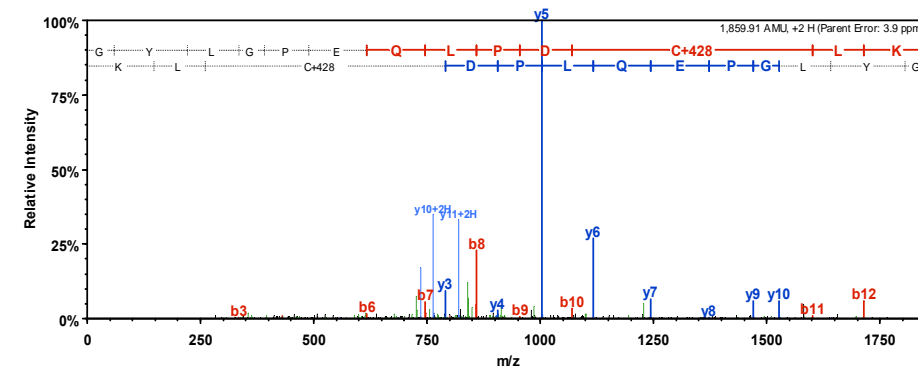

**Malate dehydrogenase, mitochondrial (K)SQETEcTYFSTPLLLGK(K)**

**XCorr: 2.59 ΔCn: 0.49**

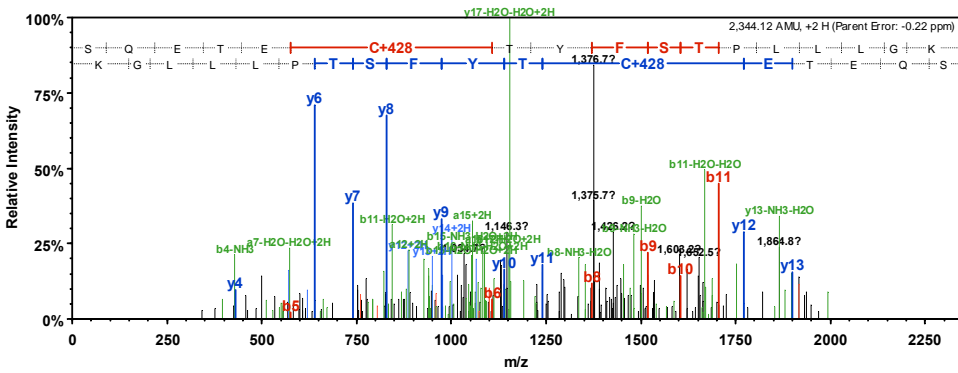

**CAST(R)TSMcSIQSAPPEPATLK(G)**

**XCorr: 2.4946 ΔCn: 0.4552**

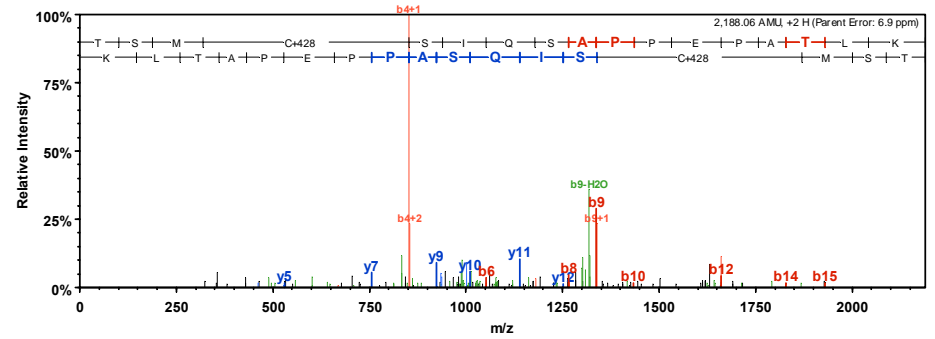

**Malate dehydrogenase, mitochondrial (K)VAVLGASGGIGQPLSLLLK(N)**

**XCorr: 5.27 ΔCn: 0.80**

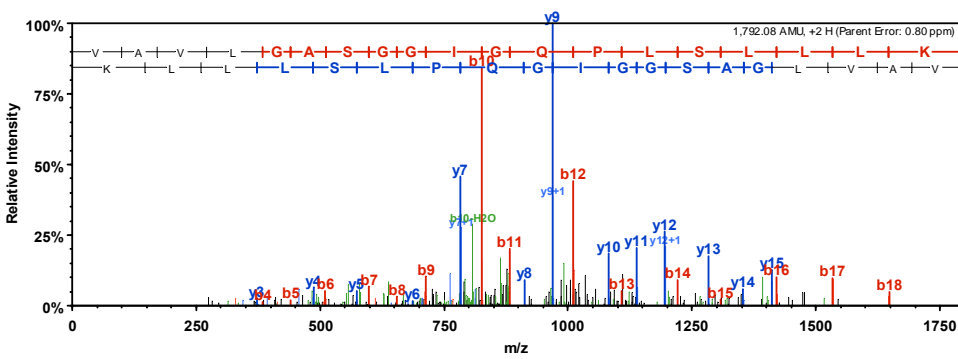

**RBM39(K)cPSIAAAIAAVNALHGR(W)**

**XCorr: 3.845 ΔCn: 0.6294**

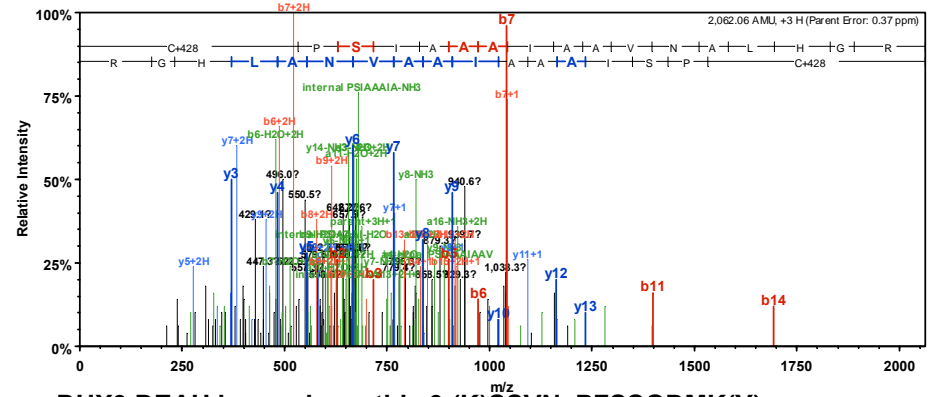

**CAST Calpastatin (K)AAPAVSEAVcR(T)**

**XCorr: 2.83 ΔCn: 0.59**

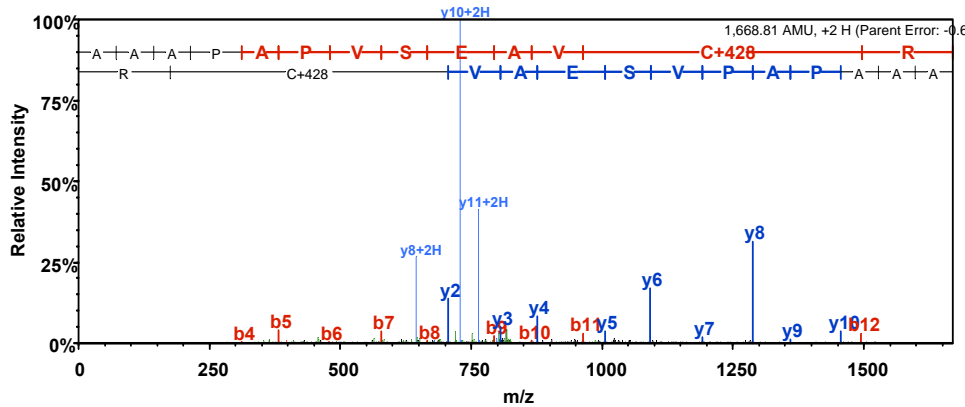

**DHX9 DEAH box polypeptide 9 (K)SSVncPFSSQDMK(Y)**

**XCorr: 3.02 ΔCn: 0.34**

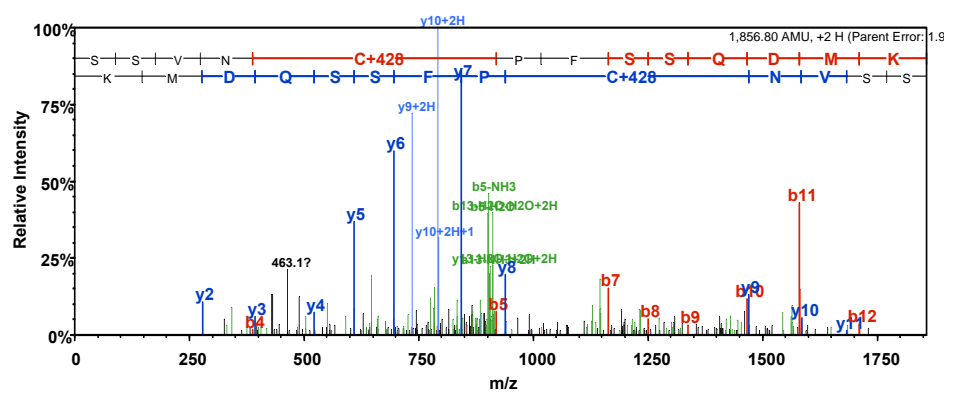



**HNRNPA1 (R)SHFEQWGLTLDcVVmR(D)**

**XCorr: 3.49 ΔCn: 0.51**

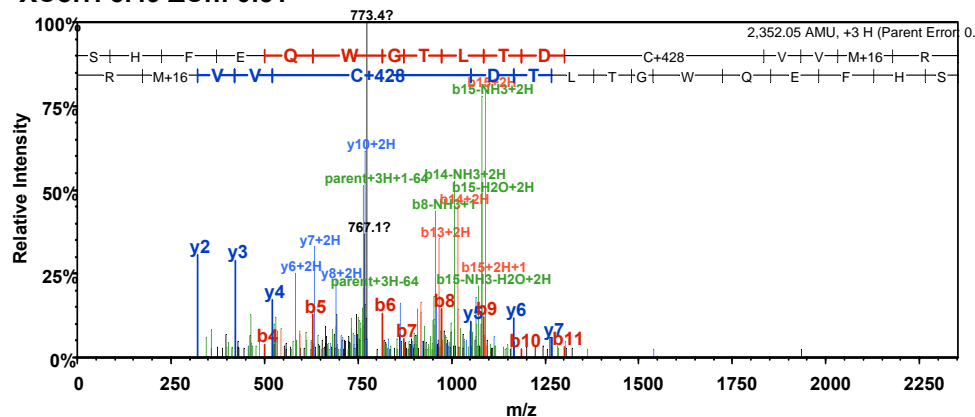

**Calponin-2 (K)AGQcVIGLQMGTKN(C)**

**XCorr: 2.98 ΔCn: 0.40**

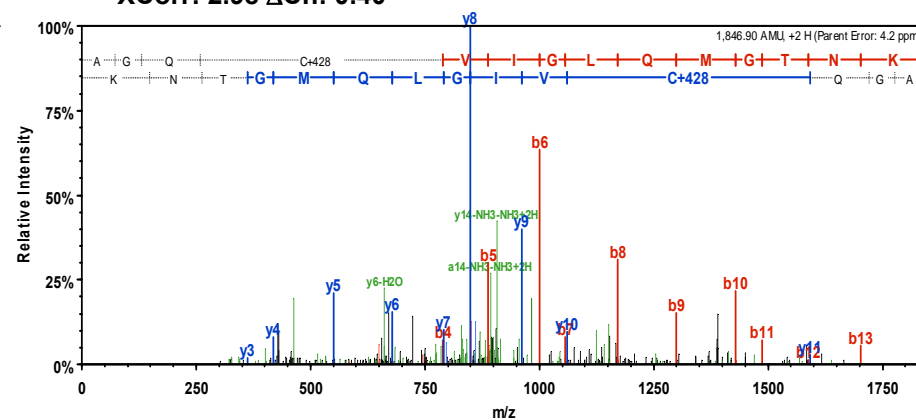

**Tubulin alpha-4A chain (K)TIGGGDSFTTFFcETGAGK(H)**

**XCorr: 2.76 ΔCn: 0.50**

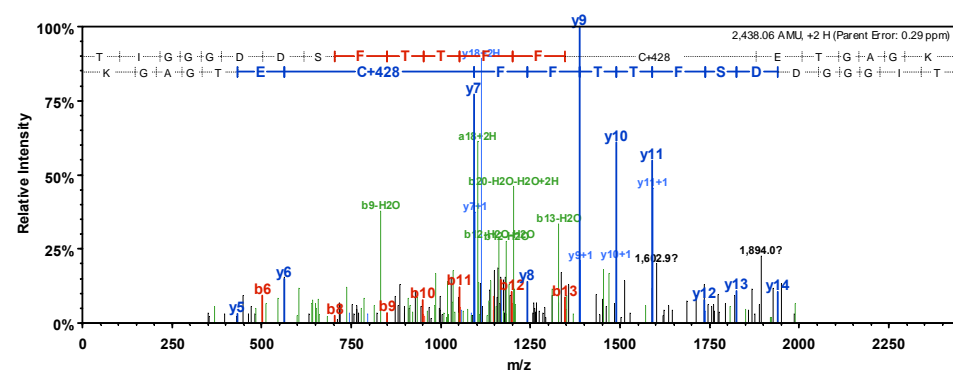

**TPM4 (K)cGDLEELK(N)**

**XCorr: 3.04 ΔCn: 0.33**

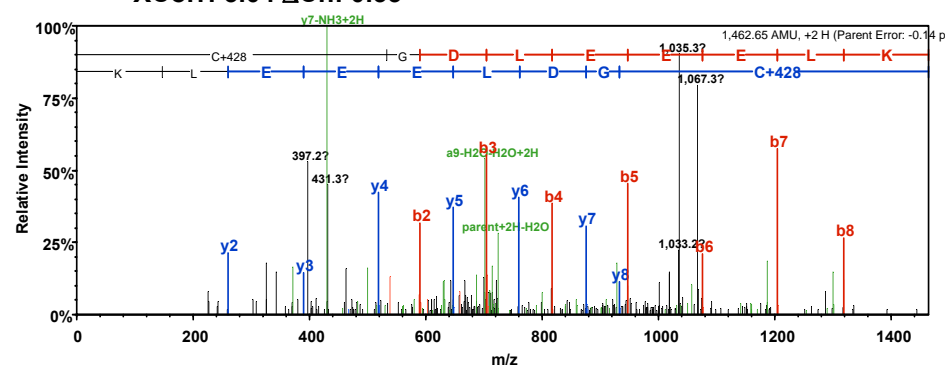

**SMARCC2 SWI/SNF complex C2 (R)PNIFLcPEIEPK(L)**

**XCorr: 2.77 ΔCn: 0.44**

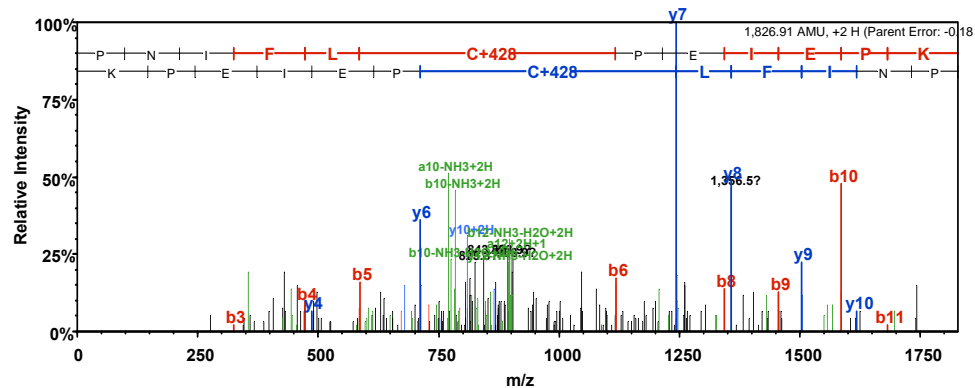

**DFNA5(R)NEVLcVLTQK(I)**

**XCorr: 3.0641 ΔCn: 0.2742**

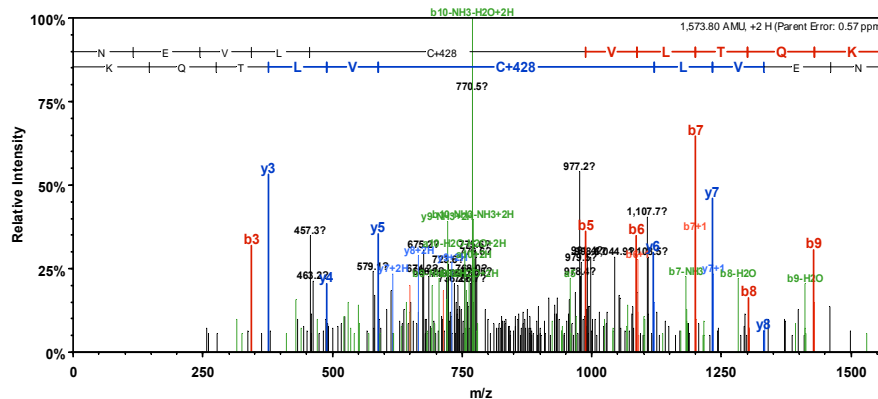

**EIF2S3(K)YNIIEVVcEYIVK(K)**  
**XCorr: 2.8318 ΔCn: 0.4642**

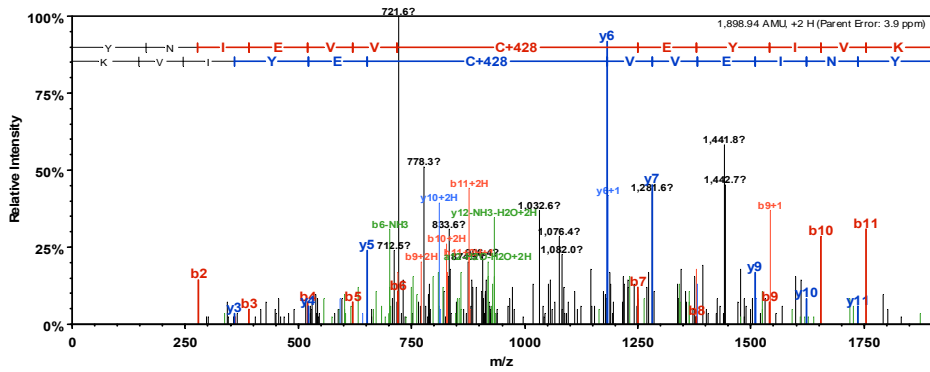

**EEF2(K)IWcFGPDGTGNILTDITK(G)**  
**XCorr: 3.0311 ΔCn: 0.3826**

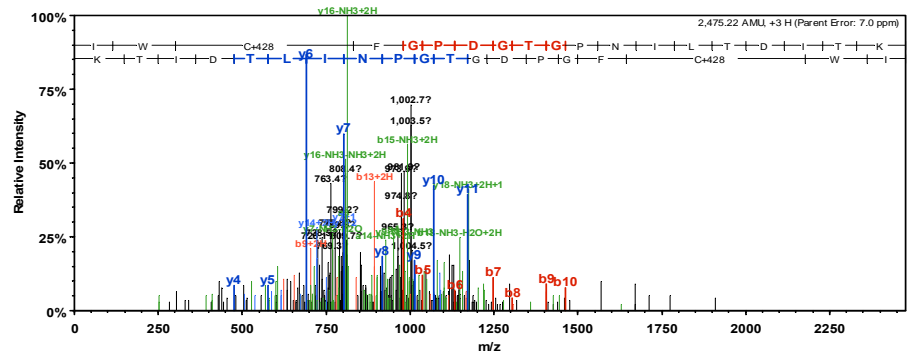

**EEF2(R)cELLYEGPPDDEAAMGIK(S)**  
**XCorr: 3.0635 ΔCn: 0.4106**

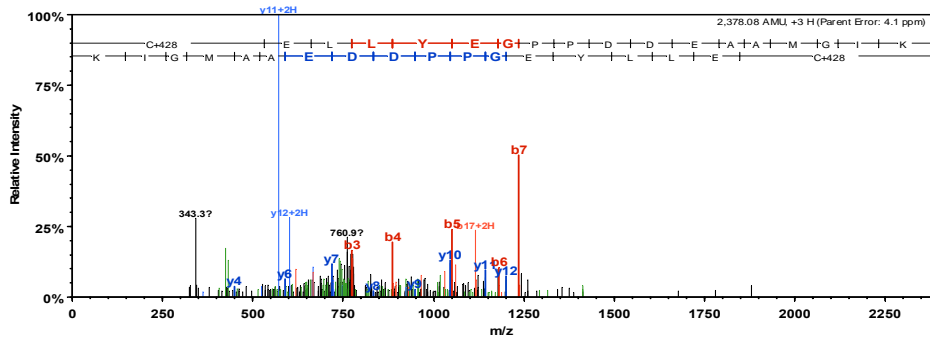

**RPL5(R)IEGDmIVcAAYAHELPK(Y)**  
**XCorr: 3.631 ΔCn: 0.5513**

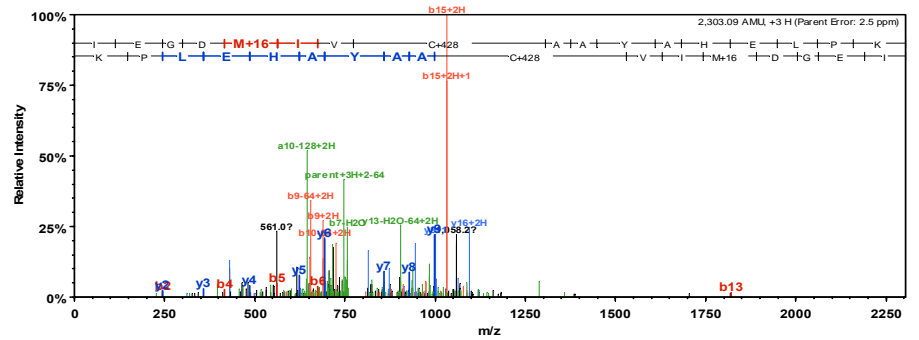

**EEF2(K)STLTDSLVcK(A)**  
**XCorr: 2.7941 ΔCn: 0.1928**

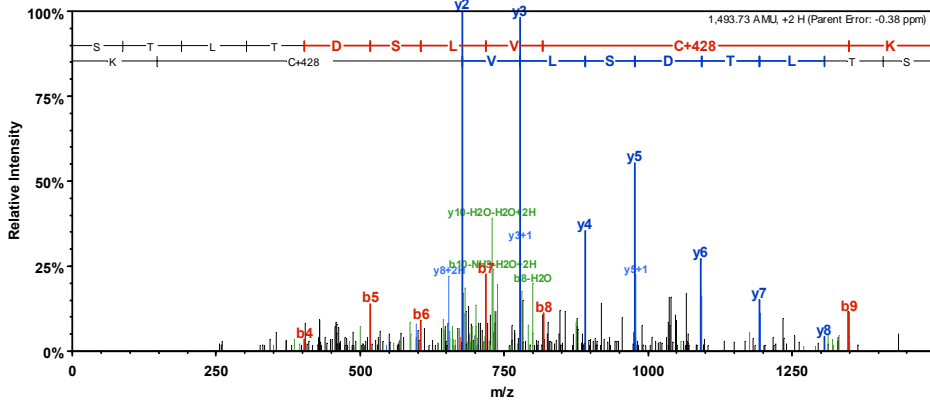

**RPL5(K)VGLTNYAAAYcTGLLLAR(R)**  
**XCorr: 2.6861 ΔCn: 0.3463**

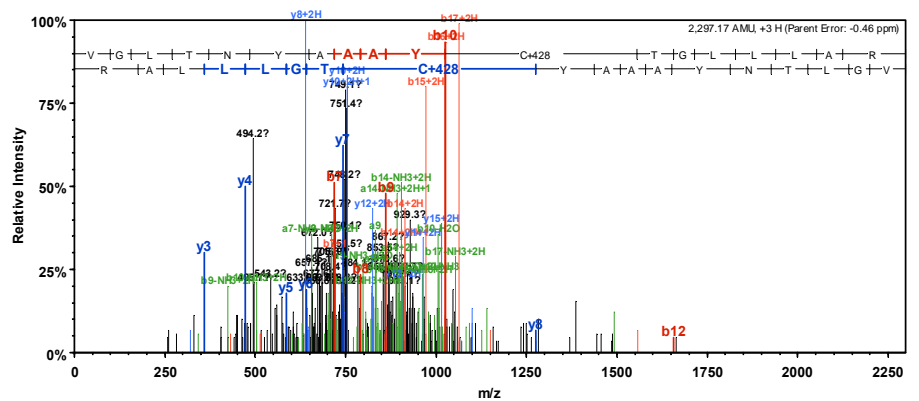

**Tu translation elongation factor, mitochondrial precursor**

**(K)KGDEcELLGHSK(N)**

**XCorr: 3.05 ΔCn: 0.40**

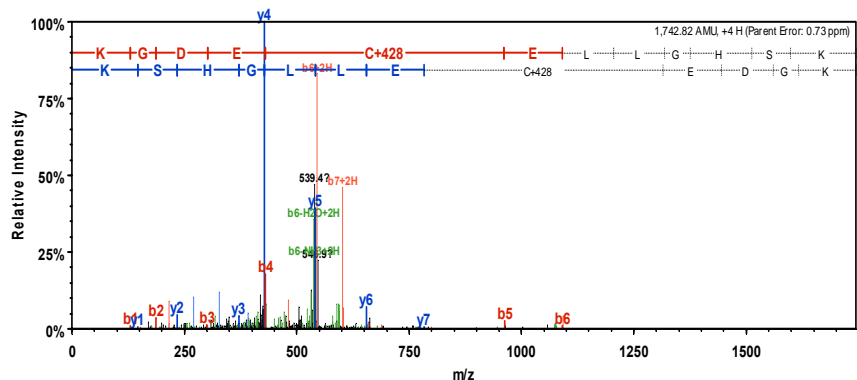

**EEF1A1 eukaryotic translation elongation factor 1 alpha 1**

**(K)SGDAAIVdMVPgKpmcVESFSDYPLGR(F)**

**XCorr: 3.61 ΔCn: 0.54**

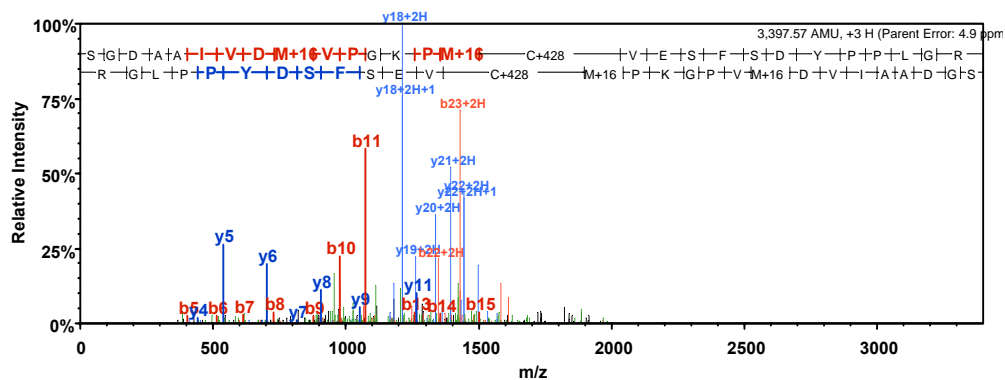

**RPL5(K)VGLTNYAAAYcTGLLLAR(R)**

**XCorr: 2.6861 ΔCn: 0.3463**

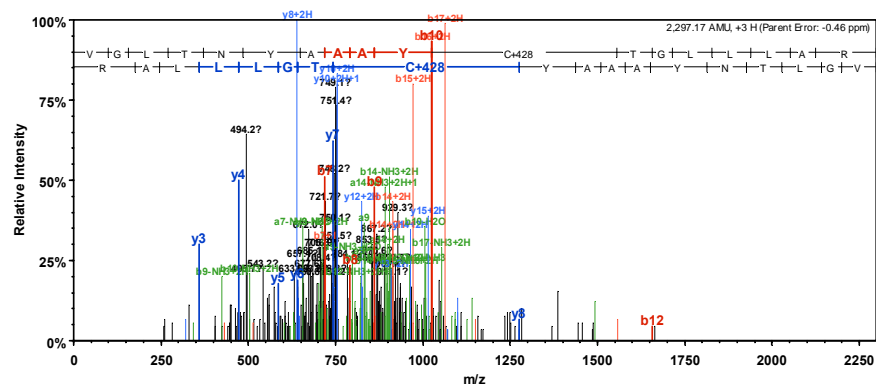

**HSPA4(R)KFDEVLVNHFcEEFGK(K)**

**XCorr: 3.1132 ΔCn: 0.1968**

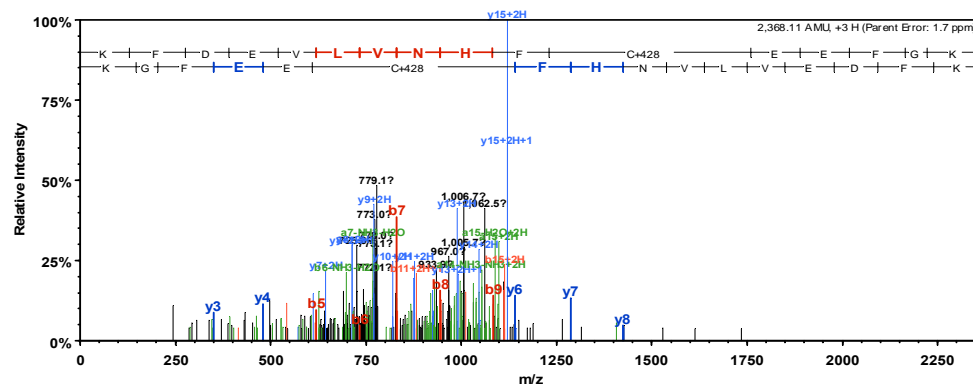

**RPN1(K)VAcITEQVLTlVnK(R)**

**XCorr: 3.9946 ΔCn: 0.4457**

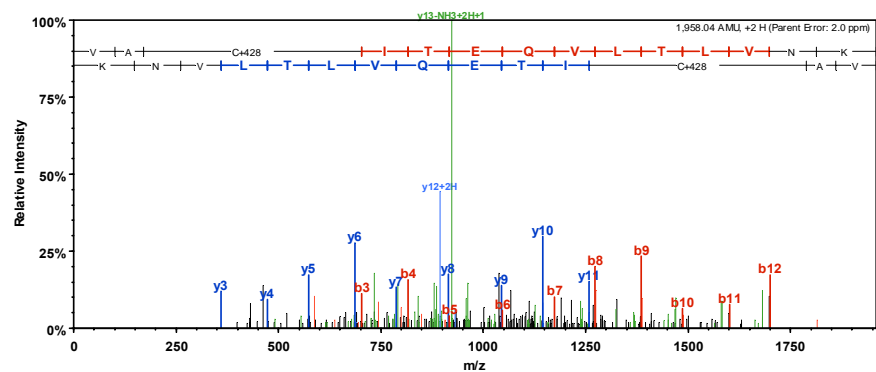

**Heat shock protein HSP 90-beta (K)cLELFSELAEDKENYK(K)**

**XCorr: 3.55 ΔCn: 0.44**

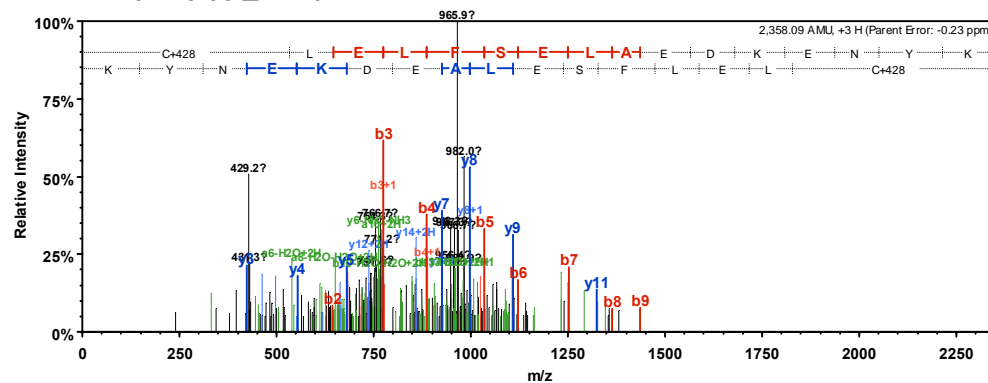

**CCT4 (R)SIHDALcVIR(C)**  
**XCorr: 2.98 ΔCn: 0.4**

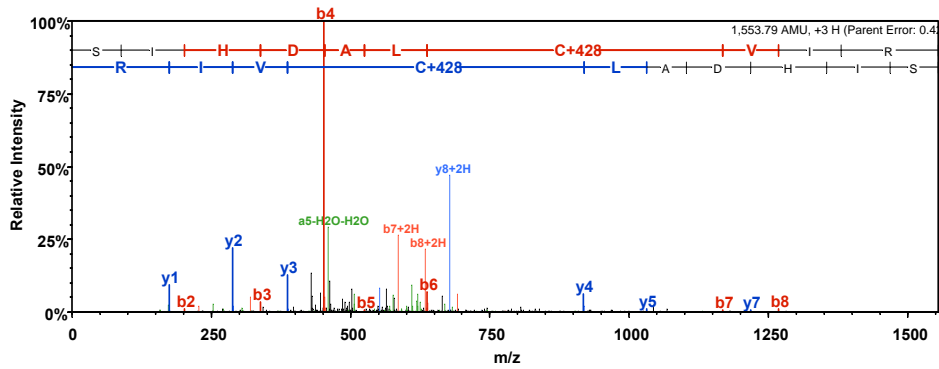

**T-complex protein 1 subunit alpha (R)lcDDELILIK(N)**  
**XCorr: 2.31 ΔCn: 0.12**

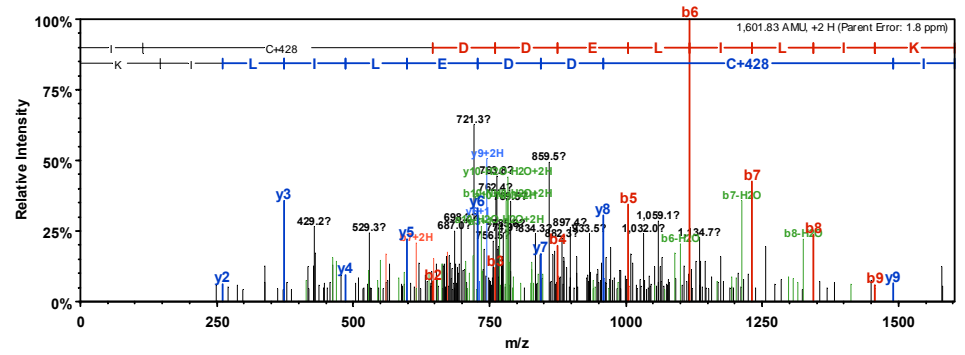

**T-complex protein 1 subunit delta (K)TGcNVLLIQK(S)**  
**XCorr: 2.46 ΔCn: 0.11**

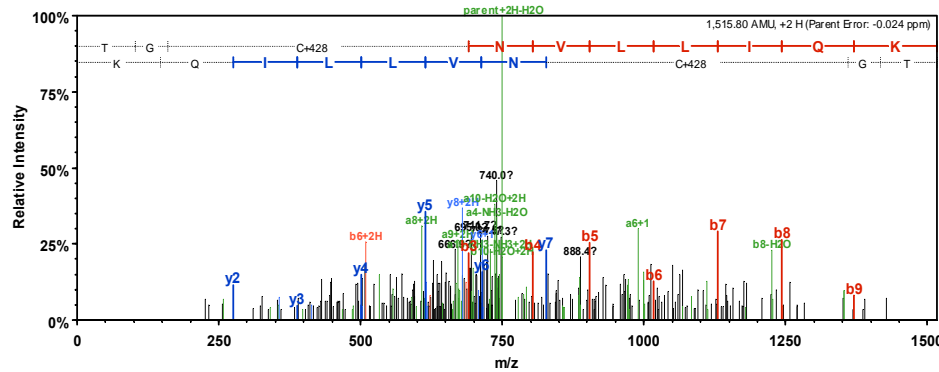

**Chaperonin containing TCP1, subunit 3 isoform b (K)IPGGIIEDScVLR(G)**  
**XCorr: 3.25 ΔCn: 0.48**

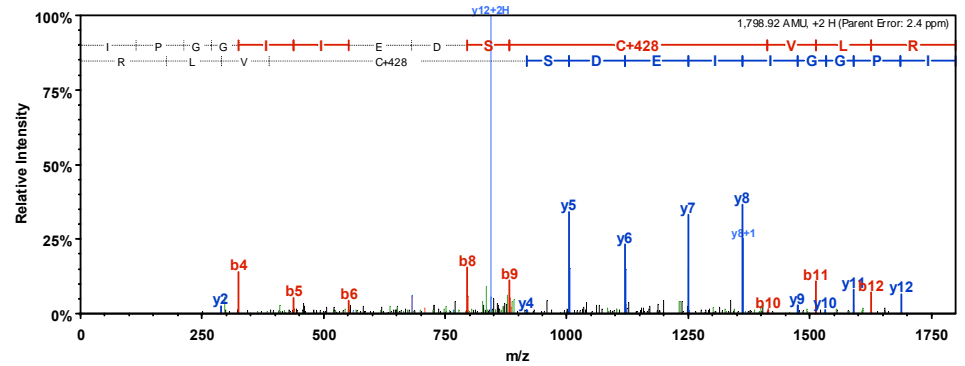

**TCP1(K)VLcELADLQDK(E)**  
**XCorr: 3.2281 ΔCn: 0.3898**

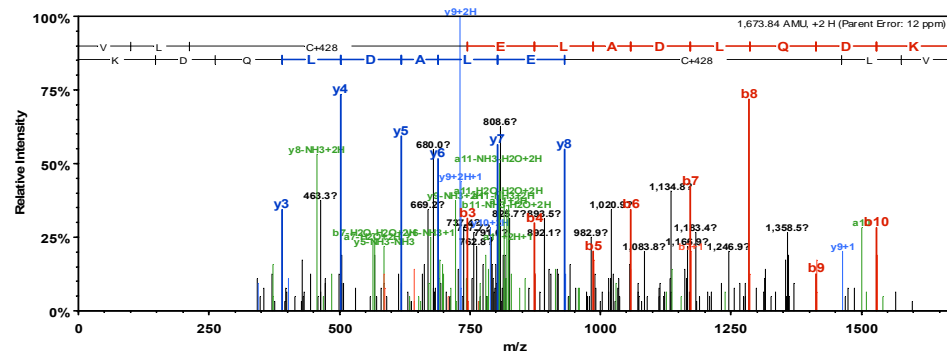

**Chaperonin containing TCP1, subunit 3 isoform b (R)WSSLAcNIALDAVK(M)**  
**XCorr: 2.15 ΔCn: 0.38**

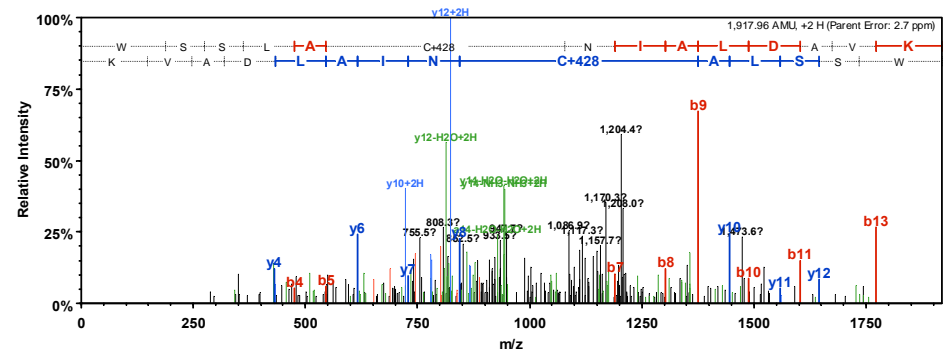

**T-complex protein 1 subunit eta (R)Y<sub>N</sub>FFFTGcPK(A)**

**XCorr: 2.20 ΔCn: 0.22**

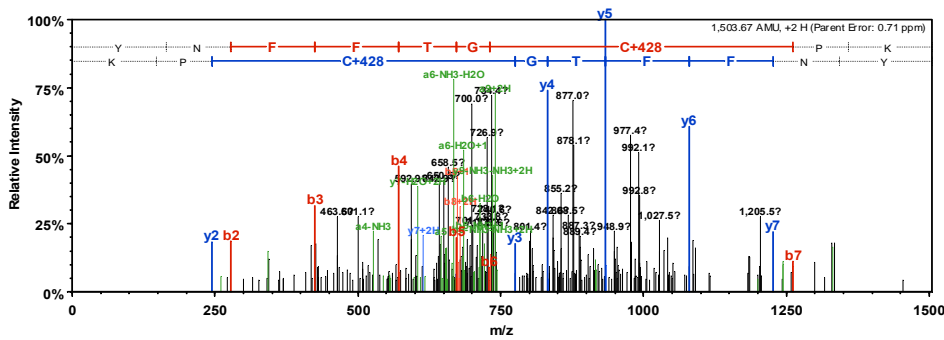

**Protein phosphatase 1G (K)cSGDVGAPR(L)**

**XCorr: 2.37 ΔCn: 0.27**

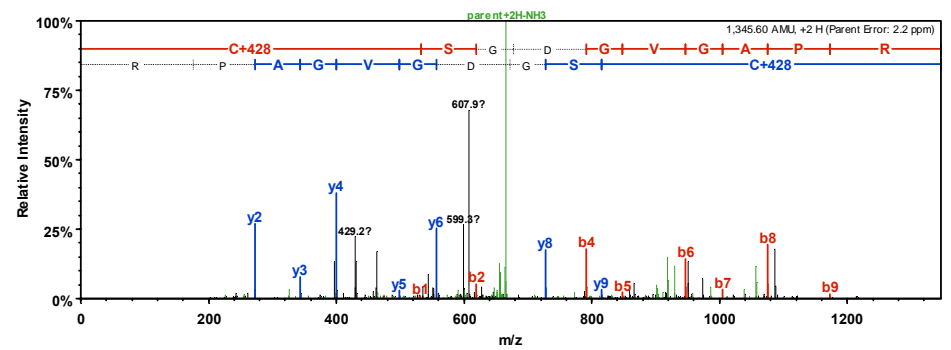

**T-complex protein 1 subunit eta (R)QLcDNAGFDATNILNK(L)**

**XCorr: 3.95 ΔCn: 0.32**

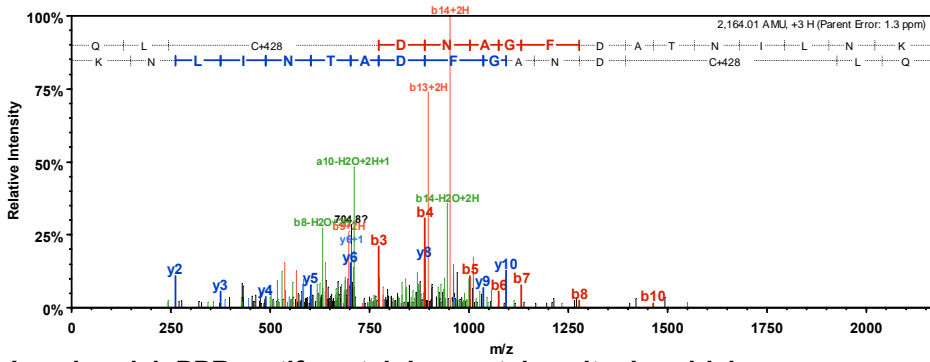

**Isoform 1 of Epidermal growth factor receptor (K)NLcYANTINWK(K)**

**XCorr: 3.47 ΔCn: 0.41**

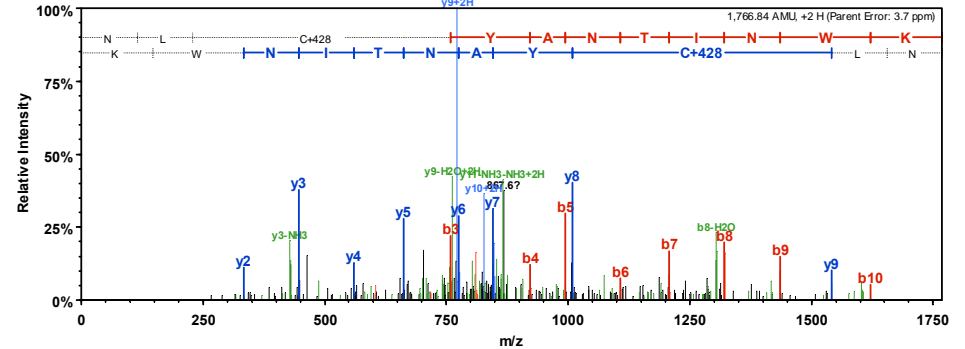

**Leucine-rich PPR motif-containing protein, mitochondrial (R)cVANNQVETLEK(L)**

**XCorr: 4.03 ΔCn: 0.52**

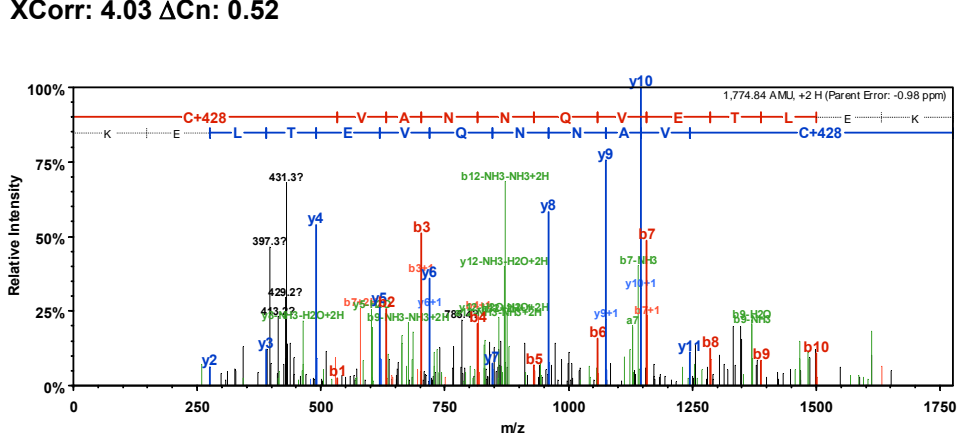

**Isoform 1 of Epidermal growth factor receptor (K)YSFGATcVK(K)**

**XCorr: 2.39 ΔCn: 0.46**

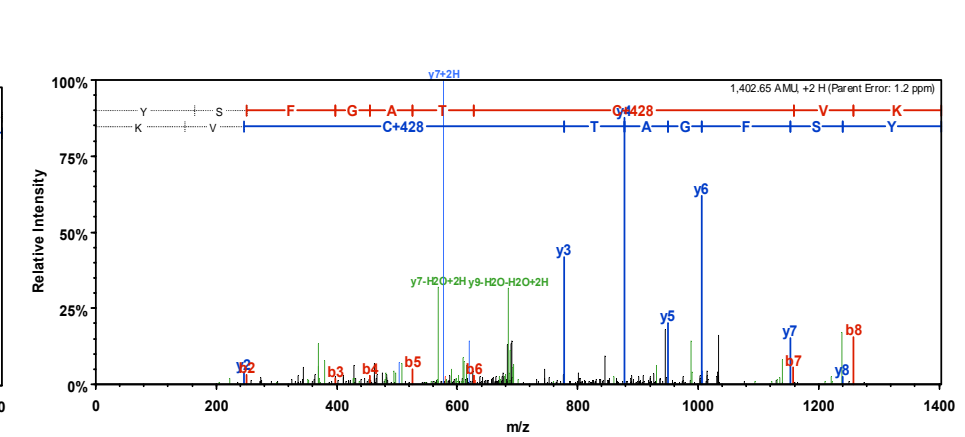

**Isoform 3 of Ribosome-binding protein 1 (R)ELcHTQSSHASLR(A)**  
**XCorr: 2.59  $\Delta$ Cn: 0.44**

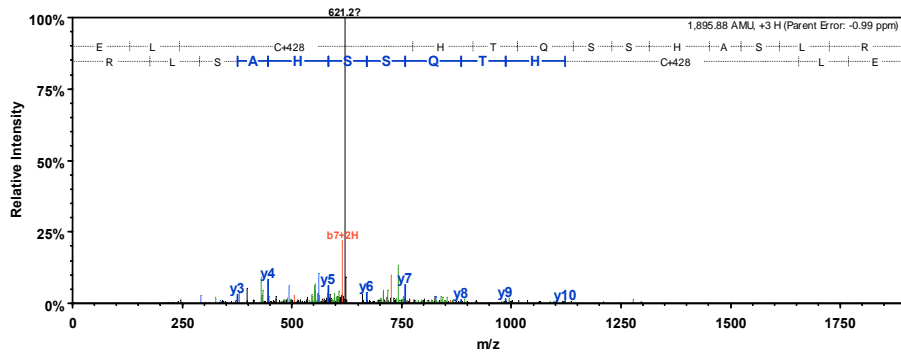

**Heterogeneous nuclear ribonucleoprotein L (K)LcFSTAQHAS(-)**  
**XCorr: 2.25  $\Delta$ Cn: 0.49**

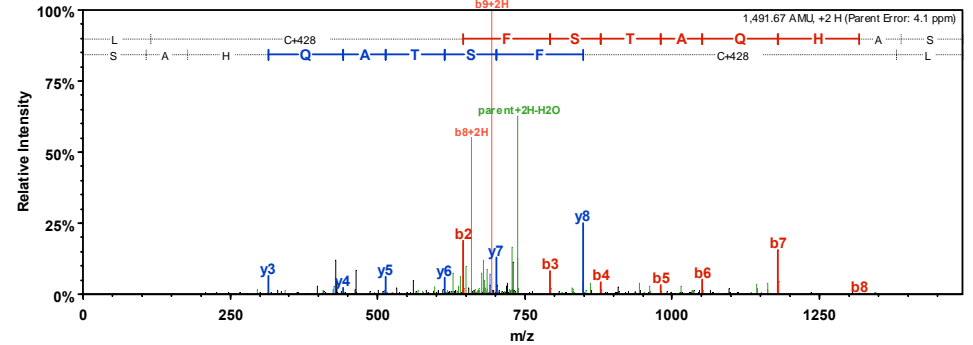

**Isoform 3 of Ribosome-binding protein 1 (K)LTAEFEEAQTSAcR(L)**  
**XCorr: 3.07  $\Delta$ Cn: 0.41**

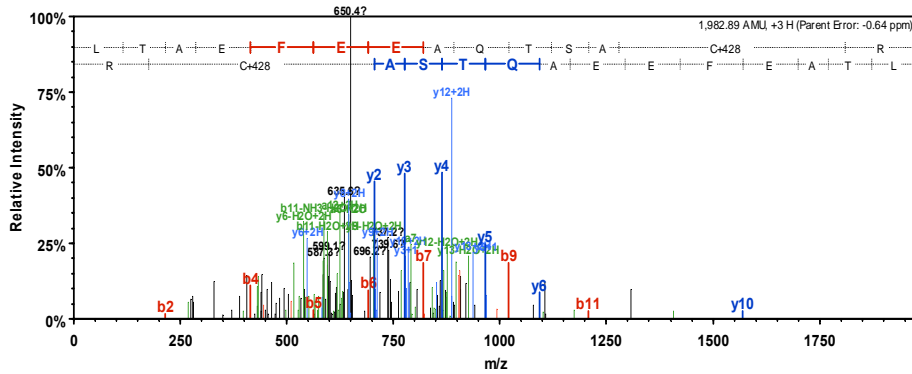

**14-3-3 protein theta (R)YLAEVAcGDDR(K)**  
**XCorr: 2.76  $\Delta$ Cn: 0.51**

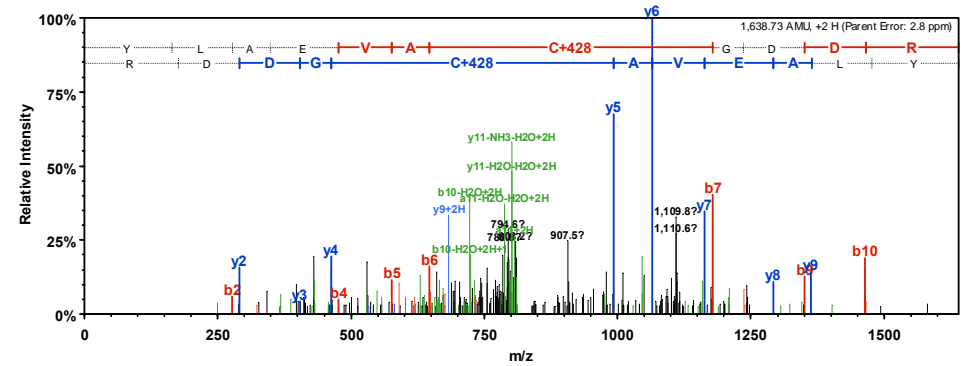

**Heterogeneous nuclear ribonucleoprotein H (R)DLNYcFSGMSDHR(Y)**  
**XCorr: 32.63  $\Delta$ Cn: 0.51**

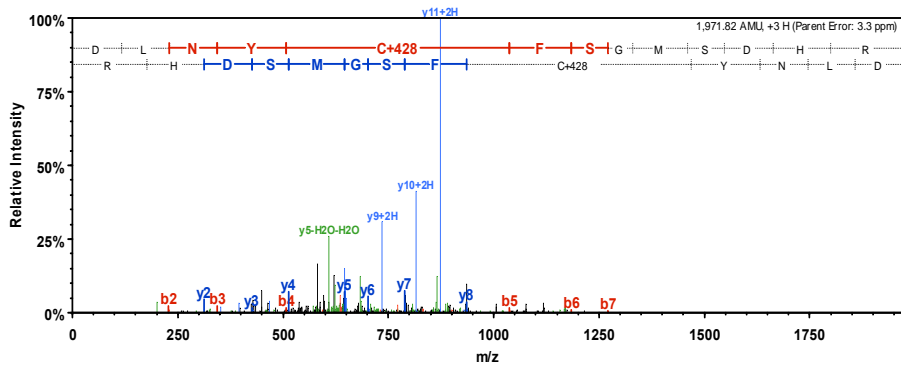

**Tubulin alpha-4A chain (R)SIQFVDWcPTGFK(V)**  
**XCorr: 4.07  $\Delta$ Cn: 0.54**

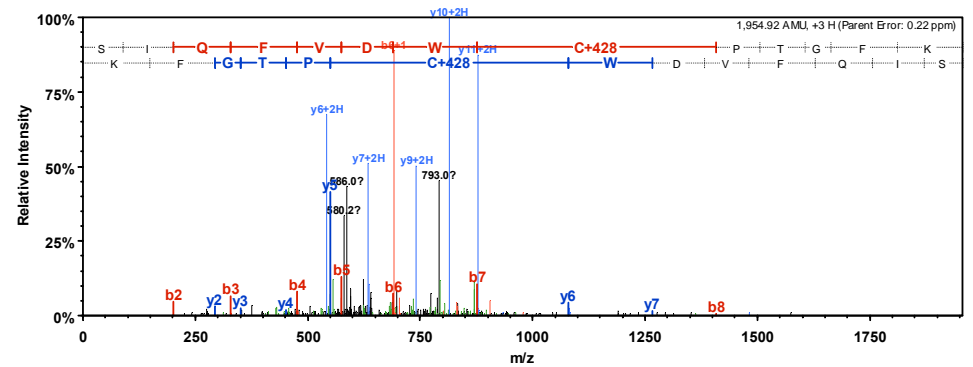

**Tubulin alpha-4A chain (R)AVcmLSNTTAIAEAWAR(L)**  
**XCorr: 3.15  $\Delta$ Cn: 0.38**

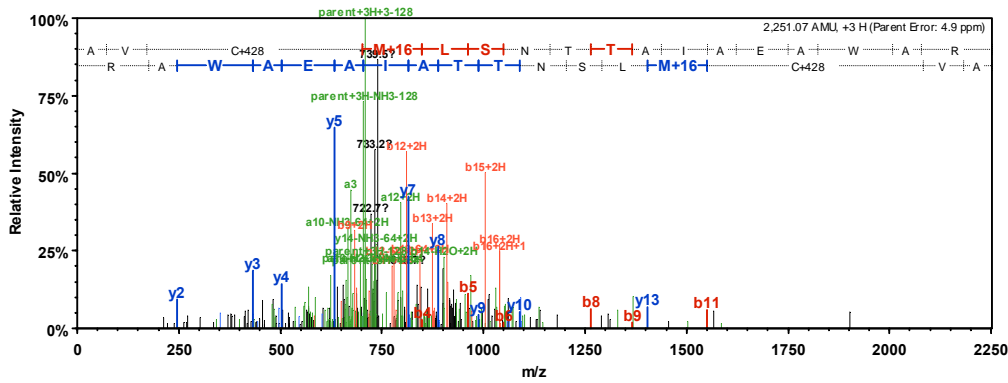

**Tubulin alpha-4A chain (K)AYHEQLSVAEITNAcFEPANQmVK(C)**  
**XCorr: 3.66  $\Delta$ Cn: 0.48**

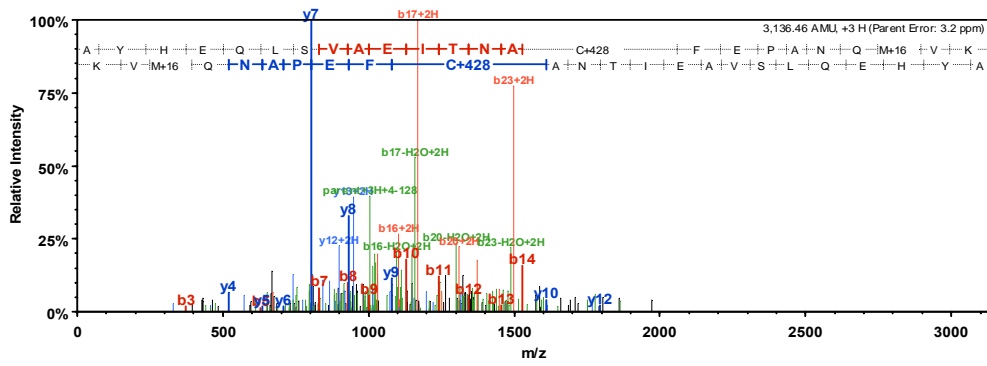

**Isoform 1 of Epidermal growth factor receptor (R)AcGADSYEmEEDGVR(K)**  
**XCorr: 4.44  $\Delta$ Cn: 0.72**

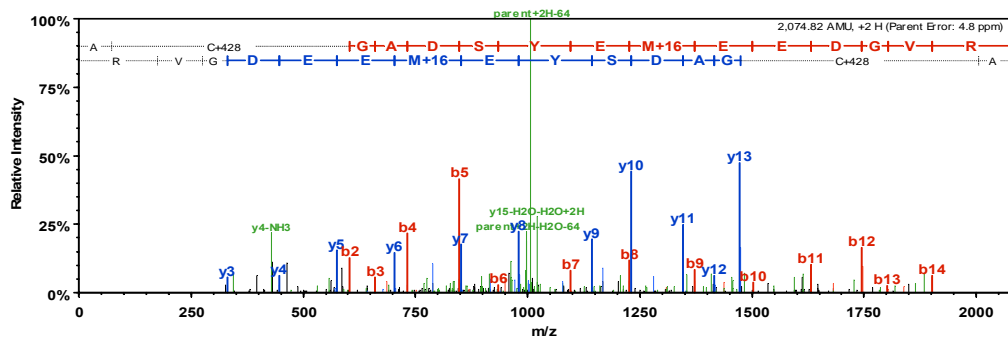

Supplement: pone.0009075.s005.pdf [file pone.0009075.s005.pdf]
