# Supplementary material for: Comprehensive Identification and Modified-Site Mapping of S-Nitrosylated Targets in Prostate Epithelial Cells
Source: PubMed Central journal article supplement (PMC2816712; doi:10.1371/journal.pone.0009075), 2010-02-05
Supplement: pone.0009075.s001.pdf [file pone.0009075.s001.pdf]

|                                                                                                    |                                                         |                                                                                                                                                                                                                                                                                                                         |                                                                                        |                                                                                        |                                                                                                                                                       |                                                                 |                                                   |                                   |                                                          |                                      |                                      |              |
|----------------------------------------------------------------------------------------------------|---------------------------------------------------------|-------------------------------------------------------------------------------------------------------------------------------------------------------------------------------------------------------------------------------------------------------------------------------------------------------------------------|----------------------------------------------------------------------------------------|----------------------------------------------------------------------------------------|-------------------------------------------------------------------------------------------------------------------------------------------------------|-----------------------------------------------------------------|---------------------------------------------------|-----------------------------------|----------------------------------------------------------|--------------------------------------|--------------------------------------|--------------|
| IPI00017297.1<br>IPI00658109.1                                                                     | MATR3<br>CKMT1A                                         | matrin 3<br>creatine kinase, mitochondrial 1A                                                                                                                                                                                                                                                                           | 3.1E-04 (1)<br>5.0E-07 (2)                                                             | 3.0E-04 (2)<br>6.9E-10 (1)                                                             | K.LC#SLFYTNEEVAK.N                                                                                                                                    | 1944.93                                                         | 2.46                                              | 2                                 | 2.12E-06                                                 | 3.43                                 | 0.39                                 | [19]         |
| <b>mRNA splicing / processing / transcription regulation</b>                                       |                                                         |                                                                                                                                                                                                                                                                                                                         |                                                                                        |                                                                                        |                                                                                                                                                       |                                                                 |                                                   |                                   |                                                          |                                      |                                      |              |
| IPI00012074.3<br>IPI00011274.3<br>IPI00031556.7<br>IPI00479786.5                                   | HNRNPR<br>HNRPDL<br>U2AF2<br>KHSRP                      | heterogeneous nuclear ribonucleoprotein R<br>heterogeneous nuclear ribonucleoprotein D-like<br>U2 small nuclear RNA auxiliary factor 2<br>KH-type splicing regulatory protein (FUSE binding protein 2)                                                                                                                  | 1.5E-05 (1)<br>1.9E-04 (1)<br>5.5E-07 (1)<br>2.5E-07 (3)                               | 3.3E-04 (1)<br>4.1E-05 (1)<br>1.5E-05 (1)<br>8.1E-09 (5)                               | R.GFC#FLEYEDHK.S<br>R.FGEVDC#TIK.T<br><br>K.IQDDSGC#K.V<br>K.C#GLVIGR.G                                                                               | 1815.79<br>1538.74<br><br>1306.60<br>1145.60                    | 3.82<br>4.42<br><br>0.60<br>3.51                  | 3<br>2<br><br>2<br>2              | 1.24E-04<br>7.86E-04<br><br>1.00E+00<br>1.00E+00         | 3.53<br>2.39<br><br>2.59<br>2.02     | 0.31<br>0.40<br><br>0.33<br>0.18     |              |
| IPI00021187.4<br>IPI00025815.2<br>IPI00216049.1<br>IPI00171903.2                                   | RUVBL1<br>TARDBP<br>HNRNPK<br>HNRNPM                    | RuvB-like 1<br>TAR DNA binding protein<br>heterogeneous nuclear ribonucleoprotein K<br>heterogeneous nuclear ribonucleoprotein M                                                                                                                                                                                        | 3.7E-08 (4)<br>2.6E-10 (1)<br>2.6E-07 (6)<br>1.0E+00 (1)                               | 1.1E-06 (1)<br>6.4E-08 (1)<br>1.4E-08 (3)<br>4.5E-06 (2)                               | <br><br><br>K.DKFNEC#GHVLYADIK.M                                                                                                                      | <br><br><br>2180.03                                             | <br><br><br>3.88                                  | <br><br><br>3                     | <br><br><br>5.31E-09                                     | <br><br><br>2.79                     | <br><br><br>0.36                     |              |
| <b>Protein disulfide-isomerase reaction</b>                                                        |                                                         |                                                                                                                                                                                                                                                                                                                         |                                                                                        |                                                                                        |                                                                                                                                                       |                                                                 |                                                   |                                   |                                                          |                                      |                                      |              |
| IPI00010796.1<br>IPI00025252.1                                                                     | P4HB<br>PDIA3                                           | proline 4-hydroxylase, beta polypeptide<br>protein disulfide isomerase family A, member 3                                                                                                                                                                                                                               | 4.8E-07 (4)<br>1.8E-08 (1)                                                             | 1.6E-09 (3)<br>1.4E-07 (4)                                                             | K.KEEC#PAVR.L<br>K.KFIQENIFGIC#PHMTEDNKDLIQGK.D<br>K.FIQENIFGIC#PHM*TEDNKDLIQGK.D<br>K.KFIQENIFGIC#PHM*TEDNKDLIQGK.D<br>K.FIQENIFGIC#PHMTEDNKDLIQGK.D | 1359.66<br>3346.65<br>3234.55<br>3362.64<br>3218.55             | 1.60<br>1.88<br>-0.41<br>-0.11<br>2.25            | 2<br>4<br>4<br>4<br>4             | 1.00E+00<br>1.35E-05<br>5.62E-03<br>5.37E-07<br>4.29E-06 | 2.64<br>4.43<br>2.56<br>4.82<br>2.58 | 0.11<br>0.32<br>0.25<br>0.53<br>0.20 | [9]          |
| IPI00299571.5                                                                                      | PDIA6                                                   | protein disulfide isomerase family A, member 6                                                                                                                                                                                                                                                                          | 1.7E-05 (2)                                                                            | 2.4E-05 (1)                                                                            |                                                                                                                                                       |                                                                 |                                                   |                                   |                                                          |                                      |                                      | [9]          |
| <b>Protein folding / stress response / Protein assembly</b>                                        |                                                         |                                                                                                                                                                                                                                                                                                                         |                                                                                        |                                                                                        |                                                                                                                                                       |                                                                 |                                                   |                                   |                                                          |                                      |                                      |              |
| IPI00020984.2<br>IPI00010720.1<br>IPI00013122.1<br>IPI00784154.1                                   | CANX<br>CCT5<br>CDC37<br>HSPD1                          | calnexin<br>chaperonin containing TCP1, subunit 5 (epsilon)<br>cell division cycle 37 homolog (S. cerevisiae)<br>heat shock 60kDa protein 1 (chaperonin)                                                                                                                                                                | 8.1E-06 (3)<br>2.6E-04 (2)<br>6.2E-04 (1)<br>8.7E-10 (2)                               | 2.9E-08 (2)<br>2.6E-08 (1)<br>2.7E-09 (1)<br>5.9E-08 (3)                               | <br><br><br>K.C#EFQDAYVLLSEK.K<br>K.C#EFQDAYVLLSEK.K<br>R.AAVEEGIVLGGG#ALLR.C [1]<br>K.C#LELFTELAEDKENYK.F                                            | <br><br><br>1972.92<br>1972.92<br>2056.08<br>2501.21            | <br><br><br>0.27<br>0.68<br>3.21<br>0.62          | <br><br><br>3<br>2<br>3<br>4      | 2.35E-05<br>3.93E-06<br>1.24E-05<br>7.19E-04             | 2.66<br>4.15<br>2.75<br>3.34         | 0.17<br>0.52<br>0.44<br>0.29         | [1]<br>[10]  |
| IPI00382470.3<br>IPI00030275.5<br>IPI00027230.3<br>IPI00013894.1<br>IPI00003362.2<br>IPI00003865.1 | HSP90AA1<br>TRAP1<br>HSP90B1<br>STIP1<br>HSPA5<br>HSPA8 | heat shock protein 90kDa alpha (cytosolic), class A member 1<br>TNF receptor-associated protein 1<br>heat shock protein 90kDa beta (Grp94), member 1<br>stress-induced-phosphoprotein 1 (Hsp70/Hsp90-organizing protein)<br>heat shock 70kDa protein 5 (glucose-regulated protein, 78kDa)<br>heat shock 70kDa protein 8 | 6.8E-11 (4)<br>1.1E-08 (1)<br>1.2E-08 (4)<br>3.8E-04 (6)<br>3.1E-09 (2)<br>1.0E+00 (3) | 9.5E-06 (3)<br>3.2E-05 (4)<br>2.1E-05 (6)<br>3.1E-05 (1)<br>1.2E-11 (6)<br>9.3E-06 (1) | <br><br><br>K.C#NEIINWLDKNQTAKEEFHQQK.E<br>K.C#NEIINWLDK.N<br>K.VC#NPIITK.L<br>K.MEEFKDQLPADEC#NK.L<br>K.VC#QGER.E                                    | <br><br><br>3402.59<br>1675.80<br>1315.69<br>2224.97<br>1119.51 | <br><br><br>3.35<br>2.56<br>4.22<br>2.41<br>-0.95 | <br><br><br>4<br>2<br>2<br>3<br>2 | 2.33E-03<br>1.51E-05<br>3.79E-04<br>1.11E-08<br>9.99E-01 | 3.21<br>3.18<br>2.79<br>2.73<br>2.34 | 0.21<br>0.32<br>0.31<br>0.24<br>0.11 | [10]<br>[20] |
| IPI00007765.5                                                                                      | HSPA9                                                   | heat shock 70kDa protein 9 (mortalin)                                                                                                                                                                                                                                                                                   | 3.8E-12 (13)                                                                           | 1.9E-10 (15)                                                                           |                                                                                                                                                       |                                                                 |                                                   |                                   |                                                          |                                      |                                      |              |
| IPI00025512.2                                                                                      | HSPB1                                                   | heat shock 27kDa protein 1                                                                                                                                                                                                                                                                                              | 4.9E-07 (4)                                                                            | 1.2E-08 (1)                                                                            |                                                                                                                                                       |                                                                 |                                                   |                                   |                                                          |                                      |                                      |              |
| <b>Proteolysis</b>                                                                                 |                                                         |                                                                                                                                                                                                                                                                                                                         |                                                                                        |                                                                                        |                                                                                                                                                       |                                                                 |                                                   |                                   |                                                          |                                      |                                      |              |
| IPI00479722.2<br>IPI00032140.4<br>IPI00644196.1                                                    | PSME1<br>SERPINH1<br>SERPINB5                           | proteasome (prosome, macropain) activator subunit 1 (PA28 alpha)<br>serpin peptidase inhibitor, clade H (heat shock protein 47), member 1<br>serpin peptidase inhibitor, clade B (ovalbumin), member 5                                                                                                                  | 6.0E-05 (2)<br>6.2E-12 (7)<br>2.9E-08 (3)                                              | 7.5E-07 (1)<br>6.1E-08 (7)<br>9.1E-10 (1)                                              |                                                                                                                                                       |                                                                 |                                                   |                                   |                                                          |                                      |                                      |              |
| <b>Transport</b>                                                                                   |                                                         |                                                                                                                                                                                                                                                                                                                         |                                                                                        |                                                                                        |                                                                                                                                                       |                                                                 |                                                   |                                   |                                                          |                                      |                                      |              |
| IPI00001639.2<br>IPI00022774.3                                                                     | KPNB1<br>VCP                                            | karyopherin (importin) beta 1<br>valosin-containing protein                                                                                                                                                                                                                                                             | 9.3E-05 (1)<br>8.3E-05 (5)                                                             | 5.6E-04 (1)<br>6.7E-05 (4)                                                             | K.GVLFGYPPGC#GK.T<br>R.LGDVISIQPC#PDVK.Y                                                                                                              | 1622.79<br>1911.97                                              | 1.25<br>-0.20                                     | 2<br>2                            | 1.30E-07<br>6.61E-06                                     | 2.45<br>3.75                         | 0.41<br>0.56                         |              |

a) # of pep: number of peptides identified for each protein according to the criteria of XCorr values of 2.0 (2+) and 2.5 (3+),  $\Delta Cn \geq 0.1$  and  $\Delta$  mass precursor < 10 ppm (including the same peptide with different charge states).

b) C#: Cysteine modified by biotin-HPDP (+428.191567 amu); C@: Cysteine modified by MMTS (+45.98772 amu).

c) For each protein, only the biotinylated peptides with the highest score from the multiple peptide pull-downs are shown.

d) Underlined are the sequences have been reported in the literature.

Table S1B

| IPI No                                                                                                                               | Gene ID                                                         | Protein name                                                                                                                                                                                                                                                                           | Protein Pull-down                                                                            |                                                              | Peptide Pull-down                                                                                                                                                                                                                                                                                                                                                                                                                                                                                                                                                                                                                                                                  |                                                                                                                                                                                                                                                                                 |                                                                                                                                                                                                         |                                                                                                                      |                                                                                                                                                                                                                                                                                                          |                                                                                                                                                                                                      |                                                                                                                                                                                              |     |                                                                          |                         |
|--------------------------------------------------------------------------------------------------------------------------------------|-----------------------------------------------------------------|----------------------------------------------------------------------------------------------------------------------------------------------------------------------------------------------------------------------------------------------------------------------------------------|----------------------------------------------------------------------------------------------|--------------------------------------------------------------|------------------------------------------------------------------------------------------------------------------------------------------------------------------------------------------------------------------------------------------------------------------------------------------------------------------------------------------------------------------------------------------------------------------------------------------------------------------------------------------------------------------------------------------------------------------------------------------------------------------------------------------------------------------------------------|---------------------------------------------------------------------------------------------------------------------------------------------------------------------------------------------------------------------------------------------------------------------------------|---------------------------------------------------------------------------------------------------------------------------------------------------------------------------------------------------------|----------------------------------------------------------------------------------------------------------------------|----------------------------------------------------------------------------------------------------------------------------------------------------------------------------------------------------------------------------------------------------------------------------------------------------------|------------------------------------------------------------------------------------------------------------------------------------------------------------------------------------------------------|----------------------------------------------------------------------------------------------------------------------------------------------------------------------------------------------|-----|--------------------------------------------------------------------------|-------------------------|
|                                                                                                                                      |                                                                 |                                                                                                                                                                                                                                                                                        | Run I<br>(< 1%FP)                                                                            | Run II<br>(< 1%FP)                                           | Biotinylated peptide                                                                                                                                                                                                                                                                                                                                                                                                                                                                                                                                                                                                                                                               | MH+                                                                                                                                                                                                                                                                             | $\Delta M$                                                                                                                                                                                              | z                                                                                                                    | Prob (pep)                                                                                                                                                                                                                                                                                               | XC                                                                                                                                                                                                   | $\Delta Cn$                                                                                                                                                                                  | Ref |                                                                          |                         |
|                                                                                                                                      |                                                                 |                                                                                                                                                                                                                                                                                        | Prob/<br>(pro)                                                                               | # of<br>pep                                                  |                                                                                                                                                                                                                                                                                                                                                                                                                                                                                                                                                                                                                                                                                    |                                                                                                                                                                                                                                                                                 |                                                                                                                                                                                                         |                                                                                                                      |                                                                                                                                                                                                                                                                                                          |                                                                                                                                                                                                      |                                                                                                                                                                                              |     | Prob<br>(pro)                                                            | # of<br>pep             |
|                                                                                                                                      |                                                                 | <b>Actin binding protein</b>                                                                                                                                                                                                                                                           |                                                                                              |                                                              |                                                                                                                                                                                                                                                                                                                                                                                                                                                                                                                                                                                                                                                                                    |                                                                                                                                                                                                                                                                                 |                                                                                                                                                                                                         |                                                                                                                      |                                                                                                                                                                                                                                                                                                          |                                                                                                                                                                                                      |                                                                                                                                                                                              |     |                                                                          |                         |
| IPI00015262.10                                                                                                                       | CNN2                                                            | calponin 2                                                                                                                                                                                                                                                                             |                                                                                              | 9.27E-11(1)                                                  | K.AGQC#VIGLOMGTKN.C<br>K.DGTILC#TLMNK.L                                                                                                                                                                                                                                                                                                                                                                                                                                                                                                                                                                                                                                            | 1847.90<br>1636.79                                                                                                                                                                                                                                                              | 4.68<br>-2.18                                                                                                                                                                                           | 2<br>2                                                                                                               | 1.24E-06<br>4.93E-02                                                                                                                                                                                                                                                                                     | 2.98<br>2.43                                                                                                                                                                                         | 0.40<br>0.25                                                                                                                                                                                 |     |                                                                          |                         |
|                                                                                                                                      |                                                                 | <b>Antioxidant / free radical removal</b>                                                                                                                                                                                                                                              |                                                                                              |                                                              |                                                                                                                                                                                                                                                                                                                                                                                                                                                                                                                                                                                                                                                                                    |                                                                                                                                                                                                                                                                                 |                                                                                                                                                                                                         |                                                                                                                      |                                                                                                                                                                                                                                                                                                          |                                                                                                                                                                                                      |                                                                                                                                                                                              |     |                                                                          |                         |
| IPI00024915.2<br>IPI00000874.1                                                                                                       | PRDX5<br>PRDX1                                                  | Peroxiredoxin 5<br>peroxiredoxin 1                                                                                                                                                                                                                                                     | 2.88E-04 (2)                                                                                 | 1.09E-04 (1)                                                 | K.GVLFVGPVGAFTPGC#SK.T<br>K.HGEVC#PAGWK.P<br>K.HGEVC#PAGWKPGSDTIKPDVOK.S.[11]                                                                                                                                                                                                                                                                                                                                                                                                                                                                                                                                                                                                      | 1964.98<br>1511.70<br>2777.36                                                                                                                                                                                                                                                   | 0.65<br>-0.63<br>4.19                                                                                                                                                                                   | 3<br>3<br>3                                                                                                          | 7.78E-04<br>2.70E-02<br>1.85E-04                                                                                                                                                                                                                                                                         | 2.79<br>3.24<br>3.46                                                                                                                                                                                 | 0.31<br>0.49<br>0.41                                                                                                                                                                         |     |                                                                          | [11]                    |
|                                                                                                                                      |                                                                 | <b>Adhesion</b>                                                                                                                                                                                                                                                                        |                                                                                              |                                                              |                                                                                                                                                                                                                                                                                                                                                                                                                                                                                                                                                                                                                                                                                    |                                                                                                                                                                                                                                                                                 |                                                                                                                                                                                                         |                                                                                                                      |                                                                                                                                                                                                                                                                                                          |                                                                                                                                                                                                      |                                                                                                                                                                                              |     |                                                                          |                         |
| IPI00010697.2<br>IPI00219219.3                                                                                                       | ITGA6<br>LGALS1                                                 | integrin, alpha 6<br>lectin, galactoside-binding, soluble, 1 (galectin 1)                                                                                                                                                                                                              |                                                                                              | 6.58E-07 (3)<br>2.83E-05 (1)                                 | K.VVTC#AHR.Y<br>R.TGGLYSC#DITAR.G<br>K.SC#FEYTANPAGYNPSISIVGTLEAEK.E<br>R.FNAHGADANTIVC#NSK.D<br>K.DSNLNC#LHFNPR.F                                                                                                                                                                                                                                                                                                                                                                                                                                                                                                                                                                 | 1213.60<br>1684.79<br>3189.49<br>2018.92<br>1857.86                                                                                                                                                                                                                             | -0.48<br>2.85<br>0.42<br>3.51<br>1.16                                                                                                                                                                   | 2<br>2<br>3<br>3<br>3                                                                                                | 2.39E-04<br>6.89E-09<br>9.22E-02<br>2.24E-11<br>1.91E-05                                                                                                                                                                                                                                                 | 2.12<br>2.77<br>3.53<br>3.67<br>3.00                                                                                                                                                                 | 0.20<br>0.53<br>0.35<br>0.66<br>0.40                                                                                                                                                         |     |                                                                          |                         |
|                                                                                                                                      |                                                                 | <b>DNA Repair / DNA replication</b>                                                                                                                                                                                                                                                    |                                                                                              |                                                              |                                                                                                                                                                                                                                                                                                                                                                                                                                                                                                                                                                                                                                                                                    |                                                                                                                                                                                                                                                                                 |                                                                                                                                                                                                         |                                                                                                                      |                                                                                                                                                                                                                                                                                                          |                                                                                                                                                                                                      |                                                                                                                                                                                              |     |                                                                          |                         |
| IPI00220834.8<br>IPI00021700.3                                                                                                       | XRCC5<br>PCNA                                                   | X-ray repair complementing defective repair<br>in Chinese hamster cells 5 (double-strand-break rejoining<br>proliferating cell nuclear antigen                                                                                                                                         | 3.88E-05 (1)<br>2.14E-07 (2)                                                                 |                                                              | R.HSIHWPC#R.L<br>R.LFQC#LLHR.A<br>K.C#AGNEDIITLR.A<br>R.DLSHIGDAVVISC#AK.D.[2]                                                                                                                                                                                                                                                                                                                                                                                                                                                                                                                                                                                                     | 1463.69<br>1457.76<br>1632.79<br>1955.98                                                                                                                                                                                                                                        | 3.61<br>3.89<br>2.07<br>0.07                                                                                                                                                                            | 3<br>2<br>2<br>3                                                                                                     | 3.03E-05<br>1.16E-03<br>6.51E-05<br>1.37E-02                                                                                                                                                                                                                                                             | 2.82<br>2.27<br>3.11<br>2.96                                                                                                                                                                         | 0.42<br>0.35<br>0.52<br>0.21                                                                                                                                                                 |     |                                                                          | [2]                     |
|                                                                                                                                      |                                                                 | <b>Ion Transport</b>                                                                                                                                                                                                                                                                   |                                                                                              |                                                              |                                                                                                                                                                                                                                                                                                                                                                                                                                                                                                                                                                                                                                                                                    |                                                                                                                                                                                                                                                                                 |                                                                                                                                                                                                         |                                                                                                                      |                                                                                                                                                                                                                                                                                                          |                                                                                                                                                                                                      |                                                                                                                                                                                              |     |                                                                          |                         |
| IPI00024145.2<br>IPI00031804.1<br>IPI00010896.3<br>IPI00177817.4                                                                     | VDAC2<br>VDAC3<br>CLIC1<br>ATP2A2                               | voltage-dependent anion channel 2<br>voltage-dependent anion channel 3<br>chloride intracellular channel 1<br>ATPase, Ca++ transporting, cardiac muscle, slow twitch 2                                                                                                                 |                                                                                              | 8.89E-09 (3)<br>4.77E-06 (1)<br>2.74E-08 (3)<br>7.80E-10 (3) | K.SC#SGVEFSTSGSSNTDTGK.V<br>K.VC#NYGLTFTQK.W<br>K.LHIVQVVC#K.K<br>R.C#LALATHDNPLR.R                                                                                                                                                                                                                                                                                                                                                                                                                                                                                                                                                                                                | 2278.96<br>1701.82<br>1466.80<br>1751.88                                                                                                                                                                                                                                        | 1.82<br>1.14<br>3.25<br>-2.55                                                                                                                                                                           | 2<br>2<br>3<br>3                                                                                                     | 2.99E-07<br>1.89E-02<br>3.09E-04<br>7.63E-05                                                                                                                                                                                                                                                             | 4.56<br>2.44<br>2.51<br>4.23                                                                                                                                                                         | 0.67<br>0.22<br>0.46<br>0.51                                                                                                                                                                 |     |                                                                          | [13]<br>[13]<br><br>[1] |
|                                                                                                                                      |                                                                 | <b>Metabolism</b>                                                                                                                                                                                                                                                                      |                                                                                              |                                                              |                                                                                                                                                                                                                                                                                                                                                                                                                                                                                                                                                                                                                                                                                    |                                                                                                                                                                                                                                                                                 |                                                                                                                                                                                                         |                                                                                                                      |                                                                                                                                                                                                                                                                                                          |                                                                                                                                                                                                      |                                                                                                                                                                                              |     |                                                                          |                         |
| IPI00465439.5<br>IPI00847989.2<br>IPI00383071.1<br>IPI00026824.2<br>IPI00291510.3<br>IPI00027497.5<br>IPI00017855.1<br>IPI00291006.2 | ALDOA<br>PKM2<br>TPI1<br>HMOX2<br>IMPDH2<br>GPI<br>ACO2<br>MDH2 | aldolase A, fructose-bisphosphate<br>pyruvate kinase, muscle<br>triosephosphate isomerase 1<br>heme oxygenase (decycling) 2<br>IMP (inosine monophosphate) dehydrogenase 2<br>glucose phosphate isomerase<br>aconitase 2, mitochondrial<br>malate dehydrogenase 2, NAD (mitochondrial) | 1.75E-10 (6)<br>1.95E-10 (3)<br>5.69E-05 (1)<br>1.31E-05 (4)<br>1.00E+00 (1)<br>1.00E+00 (1) |                                                              | R.ALANSLAC#OGK.Y<br>R.VNVC#IGGVILFHETLYQK.A<br>K.ALSDHHIYLEGTLTKPNM#VTPGHAC#TQK.F<br>K.ALSDHHIYLEGTLTKPNMVTPGHAC#TQK.F<br>R.NTGIC#TIGPASR.S.[11]<br>R.AGKPVIC#ATOM#LESMIK.K<br>K.PVIC#ATOM#LESMIK.K<br>R.AGKPVIC#ATOM#LESMIK.K<br>R.AFGSDVANAVLDGADC#HMLSGETAK.G.[1]<br>K.C#DENILWLDYK.N<br>R.AGKPVIC#ATOM#LESMIK.K<br>R.AGKPVIC#ATOM#LESMIK.K<br>K.DC#GATWVVLGHSE.R<br>K.VPADTEVVC#APPTAYIDFAR.Q<br>K.VAHALAEGLGVIAC#IGEKL<br>K.GALEGSSC#PFR.T<br>R.DIDFLKEEEHC#FLEEIM#TK.R<br>K.M#IPC#DFLIPVQTOHPH.R<br>R.FNHFSLLTNTNHGHILVDYSK.N<br>K.MPC#DFLIPVQTOHPH.R<br>K.C#TTDHISAAGPWLK.F<br>K.GC#DVVVPAGVPR.K<br>K.GYLQPEQLPDC#LK.G<br>K.SQETEC#TYFSTPLLLGK.K<br>K.VAVLGAASGGIGQPLSLLK.N | 1503.75<br>2459.26<br>3518.74<br>3502.75<br>1730.88<br>2280.13<br>1991.99<br>2248.14<br>2865.31<br>1839.85<br>2264.13<br>2264.13<br>1957.91<br>2563.24<br>2179.14<br>1551.71<br>2928.32<br>2452.24<br>2457.23<br>2436.24<br>1927.92<br>1709.89<br>1860.91<br>2345.12<br>1793.09 | 0.62<br>1.28<br>-0.58<br>-5.80<br>2.70<br>1.44<br>3.86<br>1.72<br>2.41<br>1.41<br>2.95<br>2.95<br>2.16<br>4.85<br>1.88<br>3.99<br>3.10<br>0.10<br>1.25<br>-0.09<br>4.31<br>2.14<br>4.35<br>0.12<br>1.32 | 2<br>3<br>5<br>5<br>2<br>2<br>2<br>3<br>2<br>3<br>3<br>3<br>3<br>2<br>3<br>2<br>3<br>3<br>4<br>3<br>3<br>2<br>2<br>2 | 6.67E-07<br>2.76E-10<br>7.57E-04<br>1.16E-06<br>1.15E-05<br>2.52E-04<br>1.75E-06<br>1.29E-08<br>2.80E-07<br>1.24E-01<br>4.65E-08<br>9.50E-04<br>2.15E-06<br>9.72E-06<br>3.68E-03<br>6.49E-05<br>2.57E-06<br>7.28E-06<br>1.15E-04<br>9.72E-04<br>4.40E-05<br>1.27E-02<br>2.68E-08<br>5.35E-03<br>2.02E-09 | 2.67<br>3.59<br>2.77<br>3.53<br>3.09<br>4.08<br>3.51<br>4.30<br>3.77<br>2.22<br>4.46<br>2.85<br>3.43<br>3.57<br>3.35<br>2.33<br>3.59<br>3.14<br>3.87<br>2.84<br>3.86<br>2.70<br>2.47<br>2.59<br>5.27 | 0.43<br>0.46<br>0.14<br>0.28<br>0.35<br>0.57<br>0.60<br>0.59<br>0.56<br>0.36<br>0.36<br>0.55<br>0.52<br>0.53<br>0.42<br>0.32<br>0.37<br>0.52<br>0.38<br>0.46<br>0.45<br>0.51<br>0.50<br>0.80 |     | [10]<br><br>[1, 10, 11]<br><br>[1,10]<br><br>[10]<br><br>[1, 10, 11, 12] |                         |
|                                                                                                                                      |                                                                 | <b>mRNA splicing / processing / transcription</b>                                                                                                                                                                                                                                      |                                                                                              |                                                              |                                                                                                                                                                                                                                                                                                                                                                                                                                                                                                                                                                                                                                                                                    |                                                                                                                                                                                                                                                                                 |                                                                                                                                                                                                         |                                                                                                                      |                                                                                                                                                                                                                                                                                                          |                                                                                                                                                                                                      |                                                                                                                                                                                              |     |                                                                          |                         |
| IPI00163505.2<br>IPI00844578.1<br>IPI00215965.2<br>IPI00054042.1<br>IPI00150057.6<br>IPI00013881.6                                   | RBM39<br>DHX9<br>HNRNPA1<br>GTF2I<br>SMARCC2<br>HNRNPH1         | RNA binding motif protein 39<br>DEAH (Asp-Glu-Ala-His) box polypeptide 9<br>heterogeneous nuclear ribonucleoprotein A1<br>general transcription factor II, I<br>SWI/SNF regulator of chromatin, subfamily c, member 2<br>heterogeneous nuclear ribonucleoprotein H1 (H)                | 8.99E-08 (2)<br>1.00E+00 (1)<br>1.50E-08 (1)<br>1.00E+00 (1)<br>1.00E+00 (1)<br>5.62E-05 (1) |                                                              | K.C#PSIAAAIAVNALHGR.W<br>K.SSVNC#PFSSQDMK.Y<br>K.NFLYAWC#GK.R<br>R.SHFEQWGLTDC#VVMR.D<br>R.SHFEQWGLTDC#VVMR.D<br>K.MVDQLFC#K.K<br>R.PNIFLC#PEIEPK.L<br>R.DLNYC#FSGMSDHR.Y                                                                                                                                                                                                                                                                                                                                                                                                                                                                                                          | 2063.07<br>1857.80<br>1529.71<br>2353.06<br>2337.06<br>1411.66<br>1827.92<br>1972.82                                                                                                                                                                                            | 0.71<br>2.18<br>1.80<br>1.25<br>0.05<br>4.15<br>0.27<br>3.65                                                                                                                                            | 3<br>2<br>2<br>3<br>3<br>2<br>2<br>3                                                                                 | 2.65E-07<br>1.44E-03<br>1.08E-04<br>5.10E-06<br>4.61E-02<br>1.45E-04<br>2.88E-04<br>2.76E-04                                                                                                                                                                                                             | 3.85<br>3.02<br>2.34<br>3.49<br>3.32<br>2.68<br>2.77<br>2.63                                                                                                                                         | 0.63<br>0.34<br>0.11<br>0.51<br>0.38<br>0.45<br>0.33<br>0.51                                                                                                                                 |     |                                                                          |                         |

|               |          |                                                                                           |              |                                                                                                                               |                                                                                                                                                                                                                                                  |                                                                                      |                                                              |                                      |                                                                                              |                                                              |                                                              |                          |                      |
|---------------|----------|-------------------------------------------------------------------------------------------|--------------|-------------------------------------------------------------------------------------------------------------------------------|--------------------------------------------------------------------------------------------------------------------------------------------------------------------------------------------------------------------------------------------------|--------------------------------------------------------------------------------------|--------------------------------------------------------------|--------------------------------------|----------------------------------------------------------------------------------------------|--------------------------------------------------------------|--------------------------------------------------------------|--------------------------|----------------------|
| IPI00027834.3 | HNRNPL   | heterogeneous nuclear ribonucleoprotein L                                                 | 7.68E-06 (1) |                                                                                                                               | K.LC#FSTAQHAS                                                                                                                                                                                                                                    | 1492.67                                                                              | 4.47                                                         | 2                                    | 4.79E-07                                                                                     | 2.25                                                         | 0.49                                                         | [2]                      |                      |
|               |          | <b>Proteolysis</b>                                                                        |              |                                                                                                                               |                                                                                                                                                                                                                                                  |                                                                                      |                                                              |                                      |                                                                                              |                                                              |                                                              |                          |                      |
| IPI00220857.3 | CAST     | calpastatin (proteolysis)                                                                 | 1.98E-04 (1) |                                                                                                                               | K.AAAPADPVEAVC#R.T<br>K.KPADDODPIDALSGDLSDSC#PSTTETSQNTAK.D                                                                                                                                                                                      | 1669.82<br>3648.63                                                                   | -0.25<br>2.91                                                | 2<br>3                               | 2.02E-09<br>5.34E-08                                                                         | 2.83<br>6.15                                                 | 0.59<br>0.66                                                 |                          |                      |
|               |          | <b>Protein biosynthesis/ translational regulation</b>                                     |              |                                                                                                                               |                                                                                                                                                                                                                                                  |                                                                                      |                                                              |                                      |                                                                                              |                                                              |                                                              |                          |                      |
| IPI00297982.7 | EIF2S3   | eukaryotic translation initiation factor 2, subunit 3 gamma, 52kDa                        | 6.18E-08 (1) | 5.06E-06 (2)                                                                                                                  | K.YNIEVVC#EYIVK.K                                                                                                                                                                                                                                | 1899.94                                                                              | 4.18                                                         | 2                                    | 2.67E-04                                                                                     | 2.83                                                         | 0.46                                                         | [8]                      |                      |
| IPI00186290.6 | EEF2     | eukaryotic translation elongation factor 2                                                | 2.03E-10 (3) |                                                                                                                               | K.STLTDLSLVC#K.A                                                                                                                                                                                                                                 | 1494.74                                                                              | 0.60                                                         | 2                                    | 1.60E-05                                                                                     | 2.41                                                         | 0.38                                                         |                          |                      |
|               |          |                                                                                           |              |                                                                                                                               | K.IWC#FGPDGTGPNILTDITK.G                                                                                                                                                                                                                         | 2476.21                                                                              | 7.35                                                         | 3                                    | 6.70E-01                                                                                     | 3.03                                                         | 0.38                                                         |                          |                      |
|               |          |                                                                                           |              |                                                                                                                               | R.C#ELLYEGPPDDEAAMGK.S                                                                                                                                                                                                                           | 2379.07                                                                              | 4.48                                                         | 3                                    | 4.89E-04                                                                                     | 3.06                                                         | 0.38                                                         |                          |                      |
| IPI00000494.6 | RPL5     | ribosomal protein L5                                                                      | 1.00E+00 (1) |                                                                                                                               | R.IEGDM*IVC#AAYAHELK.Y                                                                                                                                                                                                                           | 2304.09                                                                              | 2.87                                                         | 3                                    | 6.43E-02                                                                                     | 3.63                                                         | 0.31                                                         |                          |                      |
|               |          |                                                                                           |              |                                                                                                                               | K.VGLTNYAAAYC#TGLLAR.R                                                                                                                                                                                                                           | 2298.18                                                                              | -0.08                                                        | 3                                    | 2.27E-04                                                                                     | 2.69                                                         | 0.35                                                         |                          |                      |
|               |          |                                                                                           |              |                                                                                                                               | R.IEGDMIVC#AAYAHELK.Y                                                                                                                                                                                                                            | 2288.09                                                                              | 1.33                                                         | 3                                    | 3.69E-07                                                                                     | 3.02                                                         | 0.27                                                         |                          |                      |
| IPI00027107.5 | TUFM     | Tu translation elongation factor, mitochondrial                                           | 1.00E+00 (1) |                                                                                                                               | K.KGDEC#ELLGHSK.N                                                                                                                                                                                                                                | 1743.82                                                                              | 1.20                                                         | 4                                    | 6.09E-06                                                                                     | 3.05                                                         | 0.40                                                         |                          |                      |
| IPI00011253.3 | RPS3     | ribosomal protein S3                                                                      | 1.00E+00 (1) |                                                                                                                               | R.GLC#AIAOAFSLR.Y [1, 11]                                                                                                                                                                                                                        | 1659.84                                                                              | 2.45                                                         | 2                                    | 1.83E-06                                                                                     | 3.29                                                         | 0.47                                                         |                          |                      |
| IPI00025874.2 | RPN1     | ribophorin I                                                                              | 2.34E-05 (2) |                                                                                                                               | K.VAC#ITEQVTLVVK.R                                                                                                                                                                                                                               | 1959.05                                                                              | 2.36                                                         | 2                                    | 9.15E-05                                                                                     | 3.99                                                         | 0.45                                                         |                          |                      |
| IPI00025447.8 | EEF1A1   | eukaryotic translation elongation factor 1 alpha 1                                        | 9.96E-01 (1) | K.SGDAAIWDM*VPGKPMC#VEFESDYPPILGR.F [2]<br>K.SGDAAIWDM*VPGKPMC#VEFESDYPPILGR.F [2]<br>K.SGDAAIWDM*VPGKPMC#VEFESDYPPILGR.F [2] | 3382.56<br>3382.56<br>3398.56                                                                                                                                                                                                                    | -1.31<br>-3.18<br>5.18                                                               | 3<br>4<br>3                                                  | 6.16E-07<br>1.31E-02<br>1.29E-09     | 3.01<br>2.95<br>3.61                                                                         | 0.36<br>0.41<br>0.53                                         | [2, 8,<br>10, 11]                                            |                          |                      |
|               |          | <b>Protein folding / stress reponse / complex assembly</b>                                |              |                                                                                                                               |                                                                                                                                                                                                                                                  |                                                                                      |                                                              |                                      |                                                                                              |                                                              |                                                              |                          |                      |
| IPI00002966.2 | HSPA4    | heat shock 70kDa protein 4                                                                | 1.17E-09 (2) |                                                                                                                               | R.KFDEVLVNHF#EEFGK.K<br>R.KFDEVLVNHF#EEFGK.K                                                                                                                                                                                                     | 2369.11<br>2369.11                                                                   | -0.41<br>2.00                                                | 4<br>3                               | 2.35E-08<br>1.35E-04                                                                         | 3.58<br>3.11                                                 | 0.40<br>0.20                                                 | [10]                     |                      |
| IPI00414676.6 | HSP90AB1 | heat shock protein 90kDa alpha (cytosolic), class B member 1                              | 6.26E-13 (5) |                                                                                                                               | K.C#LELFSELAEDKENYK.K<br>K.C#LELFSELAEDKENYK.F                                                                                                                                                                                                   | 2359.10<br>2487.20                                                                   | 0.10<br>-0.95                                                | 3<br>3                               | 2.35E-05<br>4.89E-05                                                                         | 3.56<br>4.29                                                 | 0.44<br>0.43                                                 | [10]                     |                      |
| IPI00302927.6 | CCT4     | chaperonin containing TCP1, subunit 4 (delta)                                             | 1.93E-04 (1) |                                                                                                                               | K.TGC#NVLIIQK.S                                                                                                                                                                                                                                  | 1516.80                                                                              | 0.51                                                         | 2                                    | 1.07E-04                                                                                     | 2.46                                                         | 0.11                                                         | [11]                     |                      |
| IPI00290566.1 | TCP1     | t-complex 1                                                                               | 1.50E-08 (4) |                                                                                                                               | K.ITGC#ASPGK.T<br>K.VLC#ELADLQD.K<br>R.IC#DDELIIJK.N [11]                                                                                                                                                                                        | 1261.61<br>1674.83<br>1602.83                                                        | 2.63<br>2.56<br>2.37                                         | 2<br>2<br>2                          | 8.33E-01<br>1.36E-06<br>3.79E-03                                                             | 2.40<br>3.49<br>2.31                                         | 0.17<br>0.31<br>0.24                                         | [2, 11]                  |                      |
| IPI00290770.3 | CCT3     | chaperonin containing TCP1, subunit 3 (gamma)                                             | 2.65E-05 (2) |                                                                                                                               | R.WSSLAC#NIALDAVK.M<br>K.IPGGIIFDSC#VLR.G [2]                                                                                                                                                                                                    | 1918.96<br>1799.92                                                                   | 3.01<br>2.81                                                 | 2<br>2                               | 3.79E-05<br>2.64E-07                                                                         | 2.15<br>3.25                                                 | 0.38<br>0.48                                                 | [2]                      |                      |
| IPI00018465.1 | CCT7     | chaperonin containing TCP1, subunit 7 (eta)                                               | 1.24E-05 (1) |                                                                                                                               | R.YNFFTGK#PK.A<br>R.QLC#DNAGDFATNLLK.L                                                                                                                                                                                                           | 1504.68<br>2165.02                                                                   | 1.12<br>1.66                                                 | 2<br>3                               | 3.58E-03<br>2.09E-05                                                                         | 2.20<br>3.95                                                 | 0.22<br>0.32                                                 | [11]                     |                      |
|               |          | <b>Protein phosphorylation</b>                                                            |              |                                                                                                                               |                                                                                                                                                                                                                                                  |                                                                                      |                                                              |                                      |                                                                                              |                                                              |                                                              |                          |                      |
| IPI00783271.1 | LRPPRC   | leucine-rich PPR-motif containing                                                         | 2.54E-04 (1) | 2.01E-06 (4)<br>1.17E-07 (5)                                                                                                  | R.C#VANNOVETLEK.L                                                                                                                                                                                                                                | 1775.85                                                                              | -0.65                                                        | 2                                    | 8.73E-04                                                                                     | 4.04                                                         | 0.52                                                         | [22]                     |                      |
| IPI00006167.1 | PPM1G    | protein phosphatase 1G (formerly 2C),                                                     |              |                                                                                                                               |                                                                                                                                                                                                                                                  | K.C#SGDGVGAPR.L                                                                      | 1346.60                                                      | 2.82                                 | 2                                                                                            | 1.00E+00                                                     | 2.37                                                         |                          | 0.27                 |
| IPI00018274.1 | EGFR     | epidermal growth factor receptor                                                          |              |                                                                                                                               |                                                                                                                                                                                                                                                  | R.AC#GADSYEM*EEDGVR.K<br>K.YSFGATC#VK.K<br>K.NLC#YANTINWK.K                          | 2075.82<br>1403.65<br>1767.84                                | 5.17<br>1.59<br>4.03                 | 2<br>2<br>2                                                                                  | 3.64E-08<br>8.67E-07<br>9.26E-06                             | 4.44<br>2.39<br>3.47                                         |                          | 0.72<br>0.46<br>0.41 |
|               |          | <b>Structure and motility</b>                                                             |              |                                                                                                                               |                                                                                                                                                                                                                                                  |                                                                                      |                                                              |                                      |                                                                                              |                                                              |                                                              |                          |                      |
| IPI00215743.3 | RRBP1    | ribosome binding protein 1 homolog 180kDa                                                 |              | 3.76E-06 (4)                                                                                                                  | R.ELC#HTOSSHASLR.A<br>K.LTAEFEAEQTSAC#R.L                                                                                                                                                                                                        | 1896.89<br>1983.90                                                                   | -0.69<br>-0.31                                               | 3<br>3                               | 7.59E-04<br>1.38E-04                                                                         | 2.59<br>3.07                                                 | 0.44<br>0.41                                                 | [13]                     |                      |
| IPI00010779.4 | TPM4     | tropomyosin 4                                                                             | 1.23E-07 (2) | 3.06E-04 (1)                                                                                                                  | K.C#GDLLEELK.N                                                                                                                                                                                                                                   | 1463.66                                                                              | 2.26                                                         | 2                                    | 8.08E-04                                                                                     | 2.79                                                         | 0.35                                                         | [14, 23]                 |                      |
| IPI00013808.1 | ACTN4    | actinin, alpha 4                                                                          |              |                                                                                                                               | K.IC#DQWDALGSLTHSR.R                                                                                                                                                                                                                             | 2129.99                                                                              | 1.69                                                         | 3                                    | 1.71E-08                                                                                     | 5.37                                                         | 0.65                                                         | [10, 11]                 |                      |
|               |          |                                                                                           |              |                                                                                                                               | K.AC#LISLGYDVENDR.Q                                                                                                                                                                                                                              | 1995.93                                                                              | 5.44                                                         | 2                                    | 2.80E-06                                                                                     | 3.22                                                         | 0.67                                                         |                          |                      |
| IPI00178352.5 | FLNC     | filamin C, gamma (actin binding protein 280)                                              | 1.00E+00 (1) |                                                                                                                               | K.GAGTGGLGLTVEGPC#EAK.I<br>K.GAGTGGLGLTVEGPC#EAK.I                                                                                                                                                                                               | 2044.99<br>2044.99                                                                   | -0.59<br>2.85                                                | 3<br>2                               | 4.69E-02<br>9.40E-04                                                                         | 2.54<br>3.60                                                 | 0.41<br>0.53                                                 | [2]                      |                      |
| IPI00007750.1 | TUBA4A   | tubulin, alpha 4a                                                                         | 3.20E-08 (7) |                                                                                                                               | R.SIQEVDWC#PTGFK.V [1]<br>R.SIQEVDWC#PTGFK.V [1]<br>R.AVC#M*LSNTTAAIAFAWAR.L [1]<br>K.AYHEQISVAFITNAC#FFPANOM*VK.C [1]<br>K.TIGGGDDSFITFFC#ETGAGK.H<br>R.AVC#MLSNTTAAIAFAWAR.L [1]<br>R.AVC#MLSNTTAAIAFAWAR.L [1]<br>R.AVC#MLSNTTAAIAFAWAR.L [1] | 1955.92<br>1955.92<br>2252.07<br>3137.46<br>2439.07<br>2236.07<br>2236.07<br>2252.07 | 0.64<br>1.27<br>5.12<br>3.34<br>0.68<br>1.60<br>2.40<br>3.01 | 3<br>3<br>3<br>3<br>3<br>3<br>2<br>2 | 3.01E-07<br>1.07E-07<br>4.66E-09<br>2.67E-05<br>6.50E-04<br>4.60E-05<br>6.00E-10<br>1.56E-06 | 4.07<br>3.25<br>3.15<br>3.66<br>2.76<br>3.92<br>4.61<br>3.63 | 0.54<br>0.62<br>0.38<br>0.48<br>0.50<br>0.35<br>0.55<br>0.50 | [1, 8, 10]               |                      |
|               |          | <b>Signal transduction</b>                                                                |              |                                                                                                                               |                                                                                                                                                                                                                                                  |                                                                                      |                                                              |                                      |                                                                                              |                                                              |                                                              |                          |                      |
| IPI00018146.1 | YWHAQ    | tyrosine 3-monooxygenase/tryptophan 5-monooxygenase activation protein, theta polypeptide | 4.20E-08 (2) |                                                                                                                               |                                                                                                                                                                                                                                                  | R.YLAEVAC#GDDR.K                                                                     | 1639.73                                                      | 3.22                                 | 2                                                                                            | 3.20E-06                                                     | 2.76                                                         | 0.51                     | [3]                  |
|               |          | <b>Unclassified</b>                                                                       |              |                                                                                                                               |                                                                                                                                                                                                                                                  |                                                                                      |                                                              |                                      |                                                                                              |                                                              |                                                              |                          |                      |
| IPI00550069.3 | RNH1     | ribonuclease/angiogenin inhibitor 1                                                       | 2.93E-05 (1) |                                                                                                                               | 6.40E-05 (4)                                                                                                                                                                                                                                     | R.LDDC#GLTEAR.C                                                                      | 1520.69                                                      | 5.32                                 | 2                                                                                            | 6.06E-05                                                     | 2.88                                                         | 0.41                     | [2]                  |
|               |          |                                                                                           |              |                                                                                                                               |                                                                                                                                                                                                                                                  | K.LGDVGMALC#PGLHPSSR.L                                                               | 2380.16                                                      | -1.02                                | 3                                                                                            | 3.68E-08                                                     | 3.25                                                         | 0.44                     |                      |
| IPI00021812.2 | AHNAK    | AHNAK nucleoprotein (desmoyokin)                                                          |              | K.VDVEC#PDVNIEGPEGK.W<br>K.LEGDLTGPSVGVVDPDVELEC#PDAK.L                                                                       |                                                                                                                                                                                                                                                  | 2127.98<br>2996.43                                                                   | 2.62<br>2.64                                                 | 2<br>3                               | 4.83E-07<br>3.72E-09                                                                         | 3.76<br>4.49                                                 | 0.56<br>0.49                                                 |                          |                      |
|               |          |                                                                                           |              | K.GPFVAEVDPDVELEC#PDAK.L                                                                                                      |                                                                                                                                                                                                                                                  | 2458.13                                                                              | -0.56                                                        | 3                                    | 2.40E-01                                                                                     | 2.90                                                         | 0.34                                                         |                          |                      |
| IPI00008530.1 | RPLP0    | ribosomal protein, large, P0                                                              | 8.44E-06 (6) | K.C#FIVGADNVGSK.Q                                                                                                             |                                                                                                                                                                                                                                                  | 1637.78                                                                              | 2.48                                                         | 2                                    | 2.23E-06                                                                                     | 3.95                                                         | 0.43                                                         | [2, 11]                  |                      |
| IPI00219018.7 | GAPDH    | glyceraldehyde-3-phosphate dehydrogenase                                                  | 4.62E-08 (1) | R.VPTANVSWDLIC#R.L [2]<br>R.VPTANVSWDLIC#R.L [2]                                                                              |                                                                                                                                                                                                                                                  | 1901.96<br>1901.96                                                                   | -0.06<br>2.74                                                | 3<br>2                               | 4.86E-03<br>5.57E-13                                                                         | 2.62<br>4.11                                                 | 0.44<br>0.58                                                 | [1, 2, 8,<br>11, 13, 15] |                      |

|               |       |                                             |              |              |                                                                                              |                               |                      |             |                                  |                      |                      |            |
|---------------|-------|---------------------------------------------|--------------|--------------|----------------------------------------------------------------------------------------------|-------------------------------|----------------------|-------------|----------------------------------|----------------------|----------------------|------------|
| IPI00141318.2 | CKAP4 | cytoskeleton-associated protein 4           |              | 1.04E-09 (1) | K.IISNASC#TTNC#LAPLAK.V [1,2,11]<br>K.SSSSSASAAAAAASSSASC#SR.R<br>K.SSSSSASAAAAAASSSASC#SR.R | 2194.06<br>2461.08<br>2461.08 | 5.95<br>4.29<br>3.34 | 2<br>2<br>3 | 2.38E-07<br>7.89E-11<br>1.02E-12 | 2.67<br>3.79<br>3.89 | 0.50<br>0.65<br>0.60 | [2]<br>[1] |
| IPI00645078.1 | UBA1  | ubiquitin-like modifier activating enzyme 1 | 1.48E-09 (4) |              | K.DNPGVVC#LDEAR.H                                                                            | 1816.84                       | 2.23                 | 2           | 1.69E-06                         | 3.52                 | 0.62                 |            |
| IPI00029656.1 | DFNA5 | deafness, autosomal dominant 5              | 3.82E-05 (3) |              | R.NEVLG#VLTKQ.I                                                                              | 1574.81                       | 3.61                 | 2           | 3.85E-05                         | 2.80                 | 0.44                 |            |

a) # of pep: number of peptides identified for each protein according to the criteria of XCorr values of 2.0 (2+) and 2.5 (3+),  $\Delta Cn \geq 0.1$  and  $\Delta$  mass precursor < 10 ppm (including the same peptide with different charge states).

b) C#: Cysteine modified by biotin-HPDP (+428.191567 amu); C@: Cysteine modified by MMTS (+45.98772 amu).

c) For each protein, only the biotinylated peptides with the highest score from the multiple peptide pull-downs are shown.

d) Underlined are the sequences have been reported in the literature.

### Reference List

- Hao,G., Derakhshan,B., Shi,L., Campagne,F., and Gross,S.S. (2006) SNOSID, a proteomic method for identification of cysteine S-nitrosylation sites in complex protein mixtures. *Proc.Natl.Acad.Sci.U.S.A*, **103**, 1012-1017.
- Forrester,M.T., Thompson,J.W., Foster,M.W., Nogueira,L., Moseley,M.A., and Stamler,J.S. (2009) Proteomic analysis of S-nitrosylation and denitrosylation by resin-assisted capture. *Nat.Biotechnol.*, **27**, 557-559.
- Chen,S.C., Huang,B., Liu,Y.C., Shyu,K.G., Lin,P.Y., and Wang,D.L. (2008) Acute hypoxia enhances proteins' S-nitrosylation in endothelial cells. *Biochem.Biophys.Res.Commun.*, **377**, 1274-1278.
- Liu,L., Enright,E., Sun,P., Tsai,S.Y., Mehta,P., Beckman,D.L., and Terrian,D.M. (2002) Inactivation of annexin II tetramer by S-nitrosoglutathione. *Eur.J.Biochem.*, **269**, 4277-4286.
- Contestabile,A. (2008) Regulation of transcription factors by nitric oxide in neurons and in neural-derived tumor cells. *Prog.Neurobiol.*, **84**, 317-328.
- Shi,Q., Feng,J., Qu,H., and Cheng,Y.Y. (2008) A proteomic study of S-nitrosylation in the rat cardiac proteins in vitro. *Biol.Pharm.Bull.*, **31**, 1536-1540.
- Moon,K.H., Kim,B.J., and Song,B.J. (2005) Inhibition of mitochondrial aldehyde dehydrogenase by nitric oxide-mediated S-nitrosylation. *FEBS Lett.*, **579**, 6115-6120.
- Gao,C., Guo,H., Wei,J., Mi,Z., Wai,P.Y., and Kuo,P.C. (2005) Identification of S-nitrosylated proteins in endotoxin-stimulated RAW264.7 murine macrophages. *Nitric.Oxide.*, **12**, 121-126.

9. Uehara,T., Nakamura,T., Yao,D., Shi,Z.Q., Gu,Z., Ma,Y., Masliah,E., Nomura,Y., and Lipton,S.A. (2006) S-nitrosylated protein-disulphide isomerase links protein misfolding to neurodegeneration. *Nature*, **441**, 513-517.
10. Camerini,S., Polci,M.L., Restuccia,U., Usuelli,V., Malgaroli,A., and Bachi,A. (2007) A novel approach to identify proteins modified by nitric oxide: the HIS-TAG switch method. *J.Proteome.Res.*, **6**, 3224-3231.
11. Han,P. and Chen,C. (2008) Detergent-free biotin switch combined with liquid chromatography/tandem mass spectrometry in the analysis of S-nitrosylated proteins. *Rapid Commun.Mass Spectrom.*, **22**, 1137-1145.
12. Sun,J., Morgan,M., Shen,R.F., Steenbergen,C., and Murphy,E. (2007) Preconditioning results in S-nitrosylation of proteins involved in regulation of mitochondrial energetics and calcium transport. *Circ.Res.*, **101**, 1155-1163.
13. Lefievre,L., Chen,Y., Conner,S.J., Scott,J.L., Publicover,S.J., Ford,W.C., and Barratt,C.L. (2007) Human spermatozoa contain multiple targets for protein S-nitrosylation: an alternative mechanism of the modulation of sperm function by nitric oxide? *Proteomics.*, **7**, 3066-3084.
14. Kunczewicz,T., Sheta,E.A., Goldknopf,I.L., and Kone,B.C. (2003) Proteomic analysis of S-nitrosylated proteins in mesangial cells. *Mol.Cell Proteomics.*, **2**, 156-163.
15. Hara,M.R., Agrawal,N., Kim,S.F., Cascio,M.B., Fujimuro,M., Ozeki,Y., Takahashi,M., Cheah,J.H., Tankou,S.K., Hester,L.D., Ferris,C.D., Hayward,S.D., Snyder,S.H., and Sawa,A. (2005) S-nitrosylated GAPDH initiates apoptotic cell death by nuclear translocation following Siah1 binding. *Nat.Cell Biol.*, **7**, 665-674.
16. Huang, B., Chen, S. C. & Wang, D. L. Shear flow increases S-nitrosylation of proteins in endothelial cells. *Cardiovasc. Res.* (2009).
17. Thom, S. R., Bhopale, V. M., Mancini, D. J. & Milovanova, T. N. Actin S-Nitrosylation Inhibits Neutrophil  $\beta$ 2 Integrin Function. *J. Biol. Chem.* **283**, 10822 (2008).
18. Fratelli, M. *et al.* Identification by redox proteomics of glutathionylated proteins in oxidatively stressed human T lymphocytes. *Proceedings of the National Academy of Sciences* **99**, 3505 (2002).
19. Jaffrey, S. R., Erdjument-Bromage, H., Ferris, C. D., Tempst, P. & Snyder, S. H. Protein S-nitrosylation: a physiological signal for neuronal nitric oxide. *Nat. Cell Biol.* **3**, 193-197 (2001).
20. Lopez-Sanchez, L. M. *et al.* Alteration of S-nitrosothiol homeostasis and targets for protein S-nitrosation in human hepatocytes. *Proteomics* **8** (2008).
21. Greco, T. M. *et al.* Identification of S-nitrosylation motifs by site-specific mapping of the S-nitrosocysteine proteome in human vascular smooth muscle cells. *Proceedings of the National Academy of Sciences* **103**, 7420 (2006).

22. Murillo-Carretero, M., Torroglosa, A., Castro, C., Villalobo, A. & Estrada, C. S-Nitrosylation of the epidermal growth factor receptor: A regulatory mechanism of receptor tyrosine kinase activity. *Free Radical Biology and Medicine* **46**, 471-479 (2009).
23. Martínez-Ruiz, A. & Lamas, S. Detection and proteomic identification of S-nitrosylated proteins in endothelial cells. *Arch. Biochem. Biophys.* **423**, 192-199 (2004).
