# Supplementary material for: Comprehensive Identification and Modified-Site Mapping of S-Nitrosylated Targets in Prostate Epithelial Cells
Source: PubMed Central journal article supplement (PMC2816712; doi:10.1371/journal.pone.0009075), 2010-02-05
Supplement: pone.0009075.s002.pdf [file pone.0009075.s002.pdf]

| Entrez  | Name                                                                          | PDB    | Cys residue(s) |
|---------|-------------------------------------------------------------------------------|--------|----------------|
| PDLIM1  | PDZ and LIM domain 1 (elfin)                                                  | 2pkt   | 74             |
| TUBB2C  | tubulin, beta 2C                                                              | 1tub B | 241            |
| TUBA1C  | tubulin, alpha 1c                                                             | 3du7 A | 375            |
| TUBA1C  | tubulin, alpha 1c                                                             | 3du7 A | 346            |
| ACTN1   | actinin, alpha 1                                                              | 1sjj A | 456            |
| ACTN1   | actinin, alpha 1                                                              | 1sjj A | 308            |
| CS      | citrate synthase                                                              | 1cts   | 184            |
| PDIA3   | protein disulfide isomerase family A, member 3                                | 3f8u A | 220            |
| VCP     | valosin-containing protein                                                    | 3cf1 A | 85             |
| PRDX5   | peroxiredoxin 5                                                               | 2vl2 A | 48             |
| LGALS1  | lectin, galactoside-binding, soluble, 1 (galectin 1)                          | 1gzw   | 60             |
| LGALS1  | lectin, galactoside-binding, soluble, 1 (galectin 1)                          | 1gzw A | 42             |
| PCNA    | proliferating cell nuclear antigen                                            | 1vyj   | 81             |
| PCNA    | proliferating cell nuclear antigen                                            | 1vyj   | 162            |
| CLIC1   | chloride intracellular channel 1                                              | 1rk4 A | 170            |
| ALDOA   | aldolase A, fructose-bisphosphate                                             | 2ald   | 338            |
| ALDOA   | aldolase A, fructose-bisphosphate                                             | 2ald   | 72             |
| ALDOA   | aldolase A, fructose-bisphosphate                                             | 2ald   | 239            |
| PKM2    | pyruvate kinase, muscle                                                       | 3gr4 A | 37             |
| PKM2    | pyruvate kinase, muscle                                                       | 3gr4 A | 314            |
| PKM2    | pyruvate kinase, muscle                                                       | 3gr4 A | 346            |
| PKM2    | pyruvate kinase, muscle                                                       | 3gr4 A | 140            |
| TPI1    | triosephosphate isomerase 1                                                   | 1wyi A | 86             |
| TPI1    | triosephosphate isomerase 1                                                   | 1wyi A | 41             |
| TPI1    | triosephosphate isomerase 1                                                   | 1wyi A | 126            |
| GPI     | glucose phosphate isomerase                                                   | 1iri A | 404            |
| MDH2    | malate dehydrogenase 2, NAD (mitochondrial)                                   | 2dfd A | 66             |
| MDH2    | malate dehydrogenase 2, NAD (mitochondrial)                                   | 2dfd A | 262            |
| HNRNPA1 | heterogeneous nuclear ribonucleoprotein A1                                    | 1l3k   | 43             |
| RPL5    | ribosomal protein L5                                                          | 2zkr N | 61             |
| RPL5    | ribosomal protein L5                                                          | 2zkr   | 75             |
| RPS3    | ribosomal protein S3                                                          | 2zkq C | 96             |
| EGFR    | epidermal growth factor receptor                                              | 1yy9 A | 286            |
| EGFR    | epidermal growth factor receptor                                              | 1yy9   | 266            |
| EGFR    | epidermal growth factor receptor                                              | 1yy9   | 445            |
| TUBA4A  | tubulin, alpha 4a                                                             | 1z2b A | 346            |
| TUBA4A  | tubulin, alpha 4a                                                             | 1z2b   | 375            |
| TUBA4A  | tubulin, alpha 4a                                                             | 1z2b   | 294            |
| YWHAQ   | tyrosine 3-monooxygenase/tryptophan 5-monooxygenase activation protein, theta | 2btp A | 156            |
| RNH1    | ribonuclease/angiogenin inhibitor 1                                           | 1z7x W | 37             |
| RNH1    | ribonuclease/angiogenin inhibitor 1                                           | 1z7x W | 247            |
| GAPDH   | glyceraldehyde-3-phosphate dehydrogenase                                      | 1znq   | 248            |
| GAPDH   | glyceraldehyde-3-phosphate dehydrogenase                                      | 1znq   | 152            |
