# Supplementary material for: Comprehensive Identification and Modified-Site Mapping of S-Nitrosylated Targets in Prostate Epithelial Cells
Source: PubMed Central journal article supplement (PMC2816712; doi:10.1371/journal.pone.0009075), 2010-02-05
Supplement: pone.0009075.s003.pdf [file pone.0009075.s003.pdf]

PDB structures with SNO sites:

>2pkt A  
SMTTQQIDLQGGPWFGRFLVGGKDFEQPLAISRVTPGSKAALANLCIGDVITAIDGENTS  
NMTHLEAQNRIKGC<sup>+</sup>TDNLT<sup>+</sup>LT<sup>+</sup>VARSEHESDL  
CEEEEEEECCCCCEEEEEHHHCEEEEEEECCCCHHHCCCCCEEEEECEEECC  
CCCHHHHHHHHCCCCCEEEEEEECCCCC  
663776170526480215130046575601045238813028270466020300575616  
7032530354077168601020028385699

>1tub B  
MREIVHIQAGQCGNQIGAKFWEVISDEHGIDPTGSYHGSDLQLERINVYNEAAGNKYV  
PRAILVDLEPGTMDSVRSRGPFGQIFRPDNFVFGQSGAGNNWAKGHYTEGAELVDSVLDVV  
RKESESCDCLQGFQLTHSLGGTGSMTLLISKIREEYPDRIMNTFSVVPSPKVS<sup>+</sup>DTVV  
EPYNATLSVHQLVENTDETYCIDNEALYD<sup>+</sup>ICFR<sup>+</sup>TL<sup>+</sup>KL<sup>+</sup>TP<sup>+</sup>TY<sup>+</sup>GDLNHLVSA<sup>+</sup>TMSGV<sup>+</sup>TT<sup>+</sup>CL  
RFPGQLNADLRKLA<sup>+</sup>NMV<sup>+</sup>FP<sup>+</sup>RL<sup>+</sup>H<sup>+</sup>FM<sup>+</sup>PG<sup>+</sup>FAP<sup>+</sup>LS<sup>+</sup>RG<sup>+</sup>SQ<sup>+</sup>YR<sup>+</sup>ALT<sup>+</sup>VP<sup>+</sup>EL<sup>+</sup>TQ<sup>+</sup>MF<sup>+</sup>DA<sup>+</sup>K<sup>+</sup>N<sup>+</sup>MM  
AACDPRHG<sup>+</sup>RYL<sup>+</sup>TV<sup>+</sup>AA<sup>+</sup>V<sup>+</sup>FR<sup>+</sup>GR<sup>+</sup>MS<sup>+</sup>MKE<sup>+</sup>V<sup>+</sup>DE<sup>+</sup>Q<sup>+</sup>ML<sup>+</sup>N<sup>+</sup>V<sup>+</sup>Q<sup>+</sup>N<sup>+</sup>KS<sup>+</sup>SY<sup>+</sup>F<sup>+</sup>VE<sup>+</sup>WI<sup>+</sup>P<sup>+</sup>NN<sup>+</sup>V<sup>+</sup>KT<sup>+</sup>AV<sup>+</sup>CD<sup>+</sup>I<sup>+</sup>PP<sup>+</sup>RG  
LKMSAT<sup>+</sup>FI<sup>+</sup>GN<sup>+</sup>ST<sup>+</sup>AI<sup>+</sup>QEL<sup>+</sup>FK<sup>+</sup>RI<sup>+</sup>SE<sup>+</sup>Q<sup>+</sup>T<sup>+</sup>AM<sup>+</sup>FR<sup>+</sup>KA<sup>+</sup>FL<sup>+</sup>H<sup>+</sup>W<sup>+</sup>Y<sup>+</sup>T<sup>+</sup>GEG<sup>+</sup>MD<sup>+</sup>EM<sup>+</sup>EF<sup>+</sup>TEA<sup>+</sup>ES<sup>+</sup>N<sup>+</sup>M<sup>+</sup>ND<sup>+</sup>L<sup>+</sup>VS  
EY<sup>+</sup>Q<sup>+</sup>Y<sup>+</sup>Q<sup>+</sup>D  
CEEEEEEECHHHHHHHHHHHHHCCCCCCCCCCCCCCCCCCCCCCCCCCCCCCCCCCCC  
CCCECCCCCHHHHHHHCCCCCCCCCCCCCCCCCCCCCCCCCHHHHCHHHHHHHHHHH  
HHHHCCCCCEEEEEEECCCCCCCCCHHHHHHHHHHHCCCCCEEECCCCCCCCCCCC  
CHHHHHHHHHHHCCCCCEEECCCCCHHHHHHHCCCCCCCCCHHHHHHHHHHHHHHHHC<sup>+</sup>BC  
CECCCCCHHHHHHHCCCCCCCCCEEECCCCCHHHCCCCCHHHHHHHHHCHHHCC  
CCCCCCCCCEEEEEEECCCCCCCCCHHHHHHHHHCCCCCHHHECCCCCCCCCEEECCCC  
CCCCCEEEEEEEHHHHHHHHCHHHHHHHCHHHHHCHHHHHCCCCCCCCCHHHHHHHHH  
HHHCCCC  
210000000052003001301330230000023101696544801286755141010410  
100000003330075135933241083011317727115000101222027005201500  
55017073300000000101000000001001204751582100000001145854700  
1000000000032001000000220023005622727724532007000000000000  
002022000010000000015400000001010519746876822032005100336000  
00050362200000000082000101120250268164200700200000000331179  
17100000000001200220264034104694406604826067420350142034004  
2035128





>1cts  
ASSTNLKDI LADLIPKEQARIKTFRQHGNTVVGQITVDMYGGMRGMKGLVYETS VLDP  
DEGIRFRGYSIPECKMLPKAKGGEEPLPEGLFWLLVTGQIPTEEQVSWLSKEWAKRAAL  
PSHVVTMLDNFPTNLHPMSQLSAAITALNSESNFARAYAEGIHRTKYWELIYEDCMDLIA  
KLPVAAKIYRNLYREGSSIGAI DSKLDWSHNFTNMLGYTDAQFTTELMRLYLT IHSDEH  
GNVSAHTSHLVGSALSDPYLSFAAAMNGLAGPLHGLANQEVLVWLTQLQKEVGDVSDK  
LRDYIWNLTLSNGRVVPGYGHAVLRKTDPRYTQREFALKHLPHDPMFKLVAQLYKIVPNV  
LLEQGKAKNPWPVNDAHSGVLLQYYGMTEMNYTVTFLFGVSRALGVLAQLIWSRALGFPLE  
RPKSMSTDGLIKLVDSK  
CCCCCHHHHHHHHHHHHHHHHHHHHHHHHCCCCCHHHHHHHHHHHHHHHHHHHHHHHHH  
CCEEECCCEHHHHHHHHHCCCECCCCCECHHHHHHHHHHHHHHHHHHHHHHHHHHHHH  
CHHHHHHHHHHHHHHHHHHHHHHHHHHHHHHHHHHHHHHHHHHHHHHHHHHHHHHHHH  
HHHHHHHHHHHHHHHHHHHHHHHHHHHHHHHHHHHHHHHHHHHHHHHHHHHHHHHHHH  
CCHHHHHHHHHHHHHHHHHHHHHHHHHHHHHHHHHHHHHHHHHHHHHHHHHHHHHHH  
HHHHHHHHHHHHHHHHHHHHHHHHHHHHHHHHHHHHHHHHHHHHHHHHHHHHHHHH  
HHHHHHHHHHHHHHHHHHHHHHHHHHHHHHHHHHHHHHHHHHHHHHHHHHHHHHHH  
CCCCCHHHHHHHHHHHHHHHHHHHHHHHHHHHHHHHHHHHHHHHHHHHHHHHHHHH  
954440261037105734381755787449676696538245295892882614005122  
53002072100430275014099340000000000004520563103101520181152  
184025305814692300400020042036302037047871577400320020001000  
00000000002112396381873368210020004004094530000000000000240  
624002200330142200020002006103259103200500510340276036915574  
036103601649650220329406400000300250044203814005001102700050  
0462934900202020000004414061240000000000000000000000162762  
75774547306735979

>3f8u A  
SDVLELTDDNFESRISDTGSAGLMLVEFFAPWCGHAKRLAPEYEAATR LKGI VPLAKVD  
CTANTNTCNKYGVSGYPTLKI FRDGE EAGAYDGPRTADGIVSHLKKQAGPASVPLRTEEE  
FKKFISDKDASIVGFFDDSFSEAHSEFLKAASNL RDNRYRFAHTNVESLVNEYDDN GEGII  
LFRP SHLTNKFEDKTVAYTEQKMTSGKIKKF IQENIFGI PHMTEDNKDLIQGKDLLIAY  
YDV DYEKNAKGSNYWRNRVMVAKKFLDAGHKLNF AVASRKTFSHELSDFGLESTAGEI P  
VVAIRTAKGEKFMVQEEFSRDGKALERFLQDYFDGNLKR YLKSEPI PESNDGPVKVVAE  
NFDEIVNNENKDLIEFYAPWCGHCKNLEPKYKELGELSKDPNIVIAKMDATANDVPSP  
YEV RGFPTIYFSPANKKLNPKKYEGGRELSDFI SYLQREATNPPVIQEE  
CCEEECCCHHHHHHHHHHHHHHHHHHHHHHHHHHHHHHHHHHHHHHHHHHHHHHHHH  
CCCCCHHHHHHHHHHHHHHHHHHHHHHHHHHHHHHHHHHHHHHHHHHHHHHHHHHH  
HHHHHHHHHHHHHHHHHHHHHHHHHHHHHHHHHHHHHHHHHHHHHHHHHHHHHHHH  
ECCCHHHCECECECECECCCCCHHHHHHHHHHHHHHHHHHHHHHHHHHHHHHHHH  
ECCCCCHHHHHHHHHHHHHHHHHHHHHHHHHHHHHHHHHHHHHHHHHHHHHHHHH  
EEEEEECCCCCEEECCCCCHHHHHHHHHHHHHHHHHHHHHHHHHHHHHHHHHHHHH  
CHHHHHHHHHHHHHHHHHHHHHHHHHHHHHHHHHHHHHHHHHHHHHHHHHHHHHHH  
CCCCCHHHHHHHHHHHHHHHHHHHHHHHHHHHHHHHHHHHHHHHHHHHHHHHHH  
93036033910573056159200000010410110670353023005507840200203  
045045002617070002010048284354093533071006205221350032074363  
06712646420000064880601410450066028412001061650066229703000  
001153141911843140849403233035104720232001034711820274300000  
030417933810320022003003502765380400000084055007405175684320  
200031495321008470266060035004312697295232237529728531330006  
007710234720000002030004024055305400410660520100201122042294  
071641000000065087132075444164014006631448231479

>3cf1 A
NRPNRLIVDEAINEDNSVVSLSQPKMDELQIFRGDVTLLKGGKRREAVCIVLSDDTCSDE
KIRMNRVVRNNLVRVRLGDVISIQPCPDVKYKGR IHVLP IDDTV EGITGNLFEVYLKPYFL
EAYRPIRKGDI FLVRGGMRAVEFKVVE TDPSYCVIAPDTV IHCEGEP I KREDEEESLNE
VGYYDDIGGCRKQLAQIKEMVELPLRHPALFKAIGVKPPRGILLYGPPGTGKTLIARAVAN
ETGAFFFLINGPEIMSKLAGESESNLKAFEEAEKNAPAI I F IDELDAIAPKREKTHGEV
ERRIVS QLLTLMDGLKQRAHVI VMAATNRPNSIDPALRRFGRFDREV D I GIPDATGRLEI
LQIHTKNMKLADDVDLEQVANETHGHV GADLAALCSEAAALQAIRKKMDLIDLEXETIDAE
VMNSLAVTMDDFRWALSQSNPSALRET VVEVPQVTWED IGGLEDVKRELQELVQYPVEHP
DKFLKFGMTPSKGVLFYGGPPGCKTLLAKAIANECQANFISIKGPELLTMWFGESEANVR
EIFDKARQAAPCVLFFDELDSIAKARXXXG DGGGAADRVINQILTEMDGMSTKKNVFI I
GATNRPDI IDPAILRPGRLDQLIYIPLDEKSRVAIILKANLRKSPVAKVDVLEFLAKMTN
GFSGADLTEICQACKLAIREI ESEI XXXXXXXXXXXXXXXXXXXXXXXVPEIRRDHFEEAM
RFARRSVSDNDIRKYEMFAQTLQ

CCCCCCEBCCCCCCCCCECHHHHHHCCCCCECECCCCCECCECCCECCCCCCC
CEECCHHHHCCCCCCCCCECECECCCCCEEEEECHHHCCCCCHHHCHHHHCC
CCCCEECCCCCEEEECCEEEEEECECCCCCEECCECCCCCCCCCCCCCCCCCC
CHHHHCCCCCHHHHHHHHHCCCCCCCCCCCCCCCCCCCEEECCCCCHHHHHHHHH
HHCEEEEEECHHHHCCCCCHHHHHHHHHHHCCCCCEEEEEECHHHCCCCCCCCCCCH
HHHHHHHHHHHHHHHHHHHHCCCCCEEECCCCCHHHCCCCCEEECCCCCHHHHHHH
HHHHCCCCCCCCCHHHHHHHHHCCCCCCCCCCCCCHHHHHHHHHHHHHCCCCCHH
HHHHCCCCCHHHHHHHHHCCCCCCCCCCCCCCCCCCCCCCCHHHHHHHHHCHHHHCH
HHHHHHCCCCCCEEECCCCCHHHHHHHHHCCCCCEEECCCCCHHHHHHHHHCCCCCHHH
HHHHCCCCCCEEECCCCCHHHHHHHCHXXXXCCCCCCCCCHHHHHHHHHCCCCCEEE
EEECCHHHCHHHCCCCCEEECCCCCHHHHHHHHHCCCCCECCCCCHHHHCCCC
CCCHHHHHHHHHHHCHHHHHHHHHCHXXXXXXXXXXXXXXXXXXXXCCECHHHHHHH
CCCCCCCCCHHHHHHHHHHHHHHCH

874410002225382210000055007519076811000316591300010230950542
201010000100102123201034075075053020100430183155414400045006
634200141100003102210001044062522010149141335763282494122073
200421222463133023002000123200501905101000000153130241030002
015131240404402747544006205400440375220000024022102144717423
421010110110450667210000000443630161032320020201041022600230
061503206229515264005406010232024005300420343506875579951204
122613033700420184487242753322307131741212560042011011214623
600550516401000000043130260030002438020030604302702666416405
310320141430000033000024439999955235001000110300430374231000
000221431151034560011211021054810131061404935429414044106516
000230024005303721573456769999999999999999999999750335004502
86384603472264047218525

>2v12 A
SAPIKVGDAIPAVEVFEGEPGNKVNLAE LFKGKGVLFVPGAFTPGCSKTHLPGFVEQA
EAL KAKGVQVVA CLSVNDAFVTGEWGRAHKAEGKVRLADPTGAFGKETDLLDDSLVSI
FGRNRLKRFSMVVQDGI V KALNV EPDGTGLTXSLAPNI ISQL
CCCCCCCCCEEECCCCCEEEHHHHHHCCCCCEEEEEECCCCCHHHHCHHHHHHHCH
HHHHCCCCCEEEEEECCCHHHHHHHHHCCCCCCCCCEEECCCCCHHHHHHCCCECHHHHH
HCCCECECEEEEEECEEEEEECCCCCCCCCCCCCHHHHHHCC
954055645015040222547471102710773200000000051520173002300730
53057440600000014062005016528099303000037020065040003720263
274410200000046120512020400124590205302733

>lgzw A  
ACGLVASNLNLKPGEXLVRGEVAPDAKSFVLNLGKDSNNLCLHFNPRFNAHGDANTIVC  
NSKDGGAWGTEQREAVFPFQPGSVAEVCITFDQANLTVKLPDGYEFKFPNRLNLEAINYM  
AADGDFKIKCVAFD  
CCCCCCCCCCCCCCCCCCCCCCCCCCCCCCCCCCCCCCCCCCCCCCCCCCCCCCCCCCCC  
EEEECEEECCCECCCCCCCCCCCCCCCCCCCCCCCCCCCCCCCCCCCCCCCCCCCCCCCC  
ECCCEEEEEEEEC  
57100034150547190404040268061000100535520000000061791651000  
002674544742417212043545020102045630004055545050204170810310  
00273050210207

>lw60 A  
MFEARLVQGSILKVVLEALKDLINACWDISSSGVNLQSMDSHVSLVQLTLRSEGFDY  
RCDRNLAMGVNLTSMKILKAGNEDIITLRAEDNADTLALVFEAPNQEKVSDYEMKLM  
LDVEQLGIPQEYSCVVKMPSGEFARICRDLSHIGDAVVISCAKDGVKFSASGELGNGNI  
KLSQTSNVDKEEEAVTIEMNEPVQLTFALRYLNFFTKATPLSSTVTLMSADVPLVVEYK  
IADMGHLYLAPKI  
CEEEEECHHHHHHHCCCCCCCCCCCCCCCCCCCCCCCCCCCCCCCCCCCCCCCCCCCC  
EECCCCCCCCCCCCCCCCCCCCCCCCCCCCCCCCCCCCCCCCCCCCCCCCCCCCCCCC  
CCCCCCCCCCCCCCCCCCCCCCCCCCCCCCCCCCCCCCCCCCCCCCCCCCCCCCCC  
EECCCCCCCCCCCCCCCCCCCCCCCCCCCCCCCCCCCCCCCCCCCCCCCCCCCCCCCC  
CCCCCCCCCCCCCCCC  
202020460110230030033005400030276002021209553000101041720642  
51578150102033006107403670100030529272000010576855163708149  
294653936949100204010640260063037209202010277003010759837252  
516689596775440416275607030107102201402511820201014913000106  
079001020103349

>lrk4 A  
GNCFFSQRFLMVLWLKGVTFNVTVDTKRRETIVQKLCFPGQLPFLLYGTEVHTDTNKIE  
EFLEAVLCPFRYPKLAALNPESNTAGLDIFAKFSAYIKNSNPALNDNLEKGLLKALKVLD  
NYLTSPLPEEVDETSAEDEGVSQRKFLDGNELTLADCNLLPKLHIVQVVCCKYRGFTIPE  
AFRGVHRYLSNAYAREEFASCPDDEEIELAYE  
CCCCCHHHHHHHHHCCCCCHHHHHHHHHHHCCCCCCCCCCCCCCCCCCCCCHHH  
HHHHHCCCCCCCCCCCCCHHHCCCCCHHHHHHHHHCCCCCHHHHHHHHHHHHHHH  
HHHHCCCCCHHHCCCCCCCCCCCCCCCCCCCCCHHHHHHHHHHHHHHHHHHHCCCC  
CCHHHHHHHHHHHCCCCCHHHCCCCCHHHHHHHCC  
920201010000001070200547404650362047007823214217994636270500  
300130034751460318165046103200130030141947641673362027003500  
410254066079482796963040400114700100010001010020007633806026  
614001300620372620430215564016419

>2ald A  
PYQYPALTPPEQKELSDIAHRIVAPGKGIILAADESTGSIKRLQSIGTENTENRRFYRQ  
LLLTADDRVNPCHGGVILFHETLYQKADGRPFQVIKSKGGVVGIVKVDKGVVPLAGTNG  
ETTTQGLDGLSERCAQYKKGADFAKWRVCLKIGEHTPSALAIMENANVLARYASICQQN  
GIVPIVEPEILPDGDHDLKRCQYVTEKVLAAVYKALSDHHIYLEGTLKPNMVTPGHACT  
QKFSHEEIAMATVTLRRTVPPAVTGITFLSGGQSEEEASINLNAINKCPLLKPWALTFS  
YGRALQASALKAWGGKENLKAQEEYVKRALANSLACQKGYTPSGQAGAAASESLFVSN  
HAY  
CCCCCCCCHHHHHHHHHHHHHHCCCCCEEEEECCCHHHHHHHHHHHCCCCCHHHHHHHHH  
HHHCCCHHHCCCCCEEECHHHHCCECCCCCHHHHHHHHHCCCCCEEECCCCCECCCC  
CEEECCCCCHHHHHHHHHHHCCCCCEEEEEEECCCCCCCCCHHHHHHHHHHHHHHHHH  
CCEEEEEEECCCCCHHHHHHHHHHHHHHHHHHHHHHHCCCCCHHHCECCCCCCCCCCCC  
CCCCHHHHHHHHHHHHCCCCCCCCCEEECCCCCHHHHHHHHHHHHHCCCCCCCCCEEE  
ECHHHHHHHHHHHCCCCCHHHHHHHHHHHHHHHHHHHHHHHCCCCCCCCCCCCCCCCCCC  
CCC  
978873046734640140055002802000000033730152067191733652111000  
00030474025000000241003050766330050046161000010153437189277  
011050285046202402731010000200020387012740163003000400210052  
100000000001248040640060016003200600652701230000000001105519  
692434400300010057102630100000032110130020000026072724020000  
023000110062032466328401420010040014014260547866640195602353  
967

>3gr4 A  
IQTQQLHAAMADTFLEHMCRLDIDSPPITARNTGIICTIGPASRSVETLKEMIKSGMNVA  
RLNFSHGTHEYHAETIKNVRTATESFASDPILYRPAVALDTRKGPERTGLIKSGTAEV  
ELKKGATLKITLDNAYMEKCENILWLDDYKNIKVVVEVGSKIYVDDGLISLQVKQKADF  
LVEVEVGGSLGSKKGVNLPGAAVDLPAVSEKDIQDLKFGVEQDVMVFASFIRKASDVH  
EVRKVLGEGKGNIKIKISKIENHEGVRRFDEILEASDGMVARGDLGIEIPAEKVFLAQKM  
MIGRCNRAGKPVICATQMLESMIKKPRPTRAEGSDVANAVLDGADCMLSGETAKGDYPL  
EAVRMQHLIAREAEAAIYHLQLFEELRRLAPITSDPTEATAVGAVEASFKCCSGAIVLTL  
KSGRSAHQVARYRPRAPIAVTRNPQTARQAHLRYGIFPVLCCKDPVQEAWAEDVDLRVNF  
AMNVGKARGFFKKGDVVI VLTGWRP GSGFTNTMRVVPV  
CCCCCHHHHHCCCCCHHHHHHHHHHHCCCCCCCCCCCCCEEECECCCCCHHHHHHHHHHHCCCE  
EECCCCCHHHHHHHHHHHHHHHHHHHHHHHCCCCCCCCCCCCCEEECCCCCECECECCCCCE  
EECCCCCEEECHHHCCCCCECCCCCECCCCCHHHHHCCCCCEEECCCCCEEECEEECCCCCE  
EEEEEEECCEEECCCCCEEECCCCCCCCCCCCCHHHHHHHHHHHHHCCCCCEEECCCCCHHHHH  
HHHHHHCCCCCCCCCEEECHHHHHHHHHHHHHCCCCCEEECHHHHHHHHHHHCCCCCHHHHHHHHH  
HHHHHHHHCCCCCEEECCCCCHHHHHCCCCCHHHHHHHHHHHHHCCCCCEEECHHHHHCCCCCHH  
HHHHHHHHHHHHHHCCCCCHHHHHHHHHHHHHCCCCCHHHHHHHHHHHHHHHHHHHHHCCCCCEEE  
CCCCCHHHHHHHCCCCCCCCCEEECHHHHHHHHHHHCCCCCEEECCCCCCCCCHHHHHHHHHHH  
HHHHHHHHCCCCCCCCCEEECHHHHHHHHHHHCCCCCEEECCCCCCCCCHHHHHHHHHHH  
634201401606140100020405041250110000000072014282043005110100  
002015563830240061034004422932240300000000101101001065469260  
403793601001466436202261000305401320654220203311000403232843  
030203224500063200029273534312730450060026250000000101315004  
403730365065020000001330063064007002000000030112042110000000  
0002002322000020002201424400100100000003100000021001707311  
30041023002000000104220210133155263302000000000200502000000  
240200120020001000000024410020000100020000646639336600321040  
004003416104564100000264465721000001506

>lwyi A  
APSRKFFVGGNWKMNKRKQSLGELIGTLNAAKVPADTEVVCAPPTAYIDFARQKLDPKIA  
VAAQNCYKVTNGAFTGEISPGMIKDCGATWVVLGHSERRHVFGESEDELIGQKVAHALAEG  
LGVIAICIGEKLDEREAGITEKVVFEQTKVIADNVKDWSKVVLAYEPVVAIGTGKTATPQQ  
AQEVHEKLRGWLKSNVSDAVAQSTRIIYGGSVTGATCKELASQPDVDGFLVGGASLKPEF  
VDIINAKQ  
CCCCCEEEEECECCCHHHHHHHHHHHHHCCCCCEEEEECECHHHHHHHHHHHCCCCCE  
EECCCCCCCCCECCCCCHHHHHHHCCCCCEEEECCHHHHHCCCCCHHHHHHHHHHHHHCC  
CCEEEEECCCHHHHHHHCHHHHHHHHHHHHHCCCCCEEEEECCCHHHHHCCCCCHHH  
HHHHHHHHHHHHHHCHHHHHHHCEEECCCCCHHHHHHHCCCCCEEEECCHHHHHCHH  
HHHHCCCC  
9591400000001021228403700430371820850200000000010166037401  
000000033432410100000004304050000000000342715371003003101725  
000000000336217673145002400520162095075000000010249394823162  
004005401510585337510350100011803263055007151000000270035620  
15002046

>liri A  
MAALTRDPQFQKLQQWYREHRSELNLRRLFDANKDRFNHFSLTNTNHHGILVDYSKNLV  
TEDVMRMLVDLAKSRGVEAARERMFNGEKINYTEGRAVLHVALRNRSNTPILVDGKDVMP  
EVNKVLDKMKSFQQRVRSQDQWKGVTGKTTDVINIGIGSDLGPLMVTEALKPYSGGPR  
VWYVSNIDGTHIAKTLAQLNPESLFI IASKFTTQETITNAETAKEWFLQAAKDPASAVA  
KHFVALSTNTTKVKEFGIDPQNMFEFWDWVGGRYSLWSAIGLSIALHVGFDFNFQQLLSGA  
HWMQDQHFRTTPEKNAPVLLALLGIWYINCFGCETHAMLPYDQYLHRFAAYFQQGDMSN  
GKYITKSGTRVDHQGTPIVWGEPTNGQHAFYQLIHQGTKMI PCDFLIPVQTQHPIRKGL  
HKILLANFLAQTEALMRGKSTEEARKELQAAGKSPEDLERLLPHKVFEGNRPNTNSIVFT  
KLTPFMLGALVAMYEHKIFVQGI IWDINSFDQWVGLGKQLAKKIEPELDGSAQVTSHDA  
STNGLINFIKQQRREARV  
CCHHHHCHHHHHHHHHHHHHHHCHHHHHHHCCCCCHHHHCEEEEECCCCCEEEECCECCCC  
CHHHHHHHHHHHHHCHHHHHHHHHCCCCCECCCCCECCCHHHHCCCCCCCCCEECCECHH  
HHHHHHHHHHHHHHHHCCCCCECCCCCEEEECCHHHCHHHHHHHHHHHCHHHHHCCCCCE  
EEEECCCCCHHHHHHHCCCCCHHHHEEEECCECCCCCHHHHHHHHHHHHHHHCHHHHHH  
HCEEEECCHHHHHHHCCCCCHHHHEEECCCCCHHHCCCCCHHHHHHHHHHHCHHHHHHHHH  
HHHHHHHHHCCCHHHCHHHHHHHHHHHHHHHCCCCCEEEECCHHHCHHHHHHHHHHHHH  
CCCCCCCCCECCCCCEEEECCHHHHCHHHHHHHCCCCCEEEEEEECCCCCHHHHH  
HHHHHHHHHHHHHHHCECHHHHHHHHHCCCCCHHHHHHHHHHHHCECCCCCEEEEEE  
ECCHHHHHHHHHHHHHHHHHHHHHCCCCCCCCCHHHHHHHHHHHHHHHHHHHHHCCCCCH  
HHHHHHHHHHHHCCCCC  
70201705205403511752595020272087374016401051507411000000000  
155005000300541304400330050441021252000000000364650518972005  
402600740450064036061402454503000000001001002000200322198306  
11100000000130076141200000000140512001000400242027315567002  
50000003335405706025700030150022000000000000000007202400200  
1200300371404500000000000001115010000000010021000000000000  
000005733404130000011000100100000000102000000002122623922  
002000000000000003003452026306869437750671020100402100000000  
2000000000000000000010020000021012004210560052066957086112  
00110010006037295



>2dfd A  
NAKVAVLGGASGGIGQPLSLLKNSPLVSRLLTYDIAHTPGVAADLSHIEKAAVKGYLGP  
EQLPDC LKGCDDVVVI PAGVPRKPGMTRDDL FNTNATI VATLTAACAQHCPEAMICVIANP  
VNSTIPITAEVFKKHGVNPNKIFGVTTLDIVRANTFVAELKGLDPAVNVVPIGGHAGK  
TIIPLISQCTPKVDFPDQDLTALTGRIQEAGTEVVKAKAGAGSATLSMAYAGARFVFSLV  
DAMNGKEGVVECSFVKSQETECTYFSTPLLLGKKGIEKNLIGIGKVVSSFEKMSDAIPEL  
KASIKKGEDFVKTL  
CEEEEECCCCCHHHHHHHHHCCCCCEEEEEEECCCHHHHHHHHHCCCCCEEEEEEECC  
CCHHHHHCCCCCEEECCCCCCCCCHHHHHHHHHHHHHHHHHHHHHHHCCCCCEEEEECCC  
HHHHHHHHHHHHCCCCCCCCCEECCHHHHHHHHHHHHHHHHHHHHHCCCCCHHCECEEECCCCH  
HEEECHHHCECCCCCHHHHHHHHHHHHHHHHHHHHHHHCCCCCHHHHHHHHHHHHHHH  
HHHCCCCCEEEEEEECCCCCEEEEEEECCCEEEEECCCCCHHHHHHHHHHHHHHH  
HHHHHHHHHHHHCC  
703000010146102000000021720320000173504000200200013041531316  
74025005603000001414043603020003000420060010063037000000020  
000000000200463832333100000000000000000544933047040100000126  
000000530545181458315500350030025005306252201000010000001000  
202546970400000207427040000102008500562411772392055106601530  
35005402410676

>113k A  
KEPEQLRKLFIGGLSFETDESLSRSHFEQWGLTLD CVVMRDPNTPKRSRGGFVYATVEE  
VDAAMNARPHKVDGRVVEPKRAVSSXXXXXXXXXXXTVKKIFVGGIKEDTEEHLDRDYFEQ  
YKIEVIEIMTDRGSGKKRGFVFTFDDHSDVKIIVIQKYHTVNGHNCVEVRKAL  
CCCHHHHEEEEECCCCCHHHHHHHHHHHHHCCCCCEEEEECCCCCEEEEEEECCCHHH  
HHHHHHCCCCCEEECEEECEEECCCCXXXXXXXXXXXXXCCCEEEEECCCCCHHHHHHHHHCC  
CCCEEEEEEECCCCCEEEEEEECCCHHHHHHHHHHHCCCCCEEECEEECEEECEEECC  
945543030102502670346203610462260560104337867705130100023281  
033006227060486505021289999999999996153000040657034520352058  
12605414225499666261101020320000102359606039170515409

>2zkr n  
AYFKRYQVKFRRRREGKTDYARLRLVIQDKNKYNTPKYRMIVRVTNRDIIQCIAYARIE  
GDMIVCARYAHELPHYGVKVLGTNYAAAYCTGLLLARLLNRFGMDKIYEQVEVTGDEY  
NVESIDGQPGAFTCYLDAGLARTTGNKVFGALKGAVDGLSIPHSTKRFPGYDSESEKFE  
XAEVHRKHIMGQNVADYMRYLMEDEDAYKQFSQYIKNSVTPDMMEEMYKKAHAAI  
CCCCCCCCCHHHHHHHHHCCCCCCCCCCCCCCCCCEEEEEEECEEEEEEECCCC  
CCCEEEEEEHHHHHHCCCCCCCCCHHHHHHHHHHHHHHHCCCCCCCCCCCCCCCC  
CCCCCCCCCCCCCEEECCCCCCCCCHHHHHHHHHHHCCCCCECHHHCCCCCCCCCCCC  
XCCCCCCCCCHHHHHHHHHCCCCCCCCCCCCCCCCCEEECEEECEEECCCCCHHHHHHHHH  
99481553576544451538224830211003323731000034577102020011378  
33251020407004514251133020000000000420257878768597947233638  
86455036250610110248486452201100200251503065468522528144495  
922000530005401431874975772029851318398310340100003602631

>2zsq c  
AVQISKRRKFVADGIFKAELNEFLTRELAEDGYSGVEVRVTPTRTEI IILATRQNVLGE  
KGRRIRELTAVVQKRFVPEGSVELYAEKVATRGLCAIAQAESLRYKLLGLAVRRACYG  
VLRFIMESGAKGKRVVSGKLRGQRAKSMKFDGLMIHSGDPVNYVDTAVRHVLLRQGV  
LGIKVKIMLPWD  
CECCCCCHHHHHHHHHHHHHHHCCCCCEEEEECEEECEEECEEECECHHHHHCH  
HHHHHHHHHHHHHHCCCCCCCCCEEECECHHHHHHHHHHHHHHHHHHHHHHHHHHH  
HHHHHHHHCCCCCEEECCCCCHHHCCCCCEEECECHHHHHCCCCCEEEEEEECCCCCCCC  
CEEEEEEECCCC  
320001593063003022102220375026002321501135760401010053550217  
928326601240475518682506151462646230021001402430488450380023  
00650174714000003240947956515133641660783750523504160629536  
020401003559

>1yy9 A  
EEKKVCQGTSNKLTQLGTFEDHFLSLQRMFNCEVVLGNLEITYVQRNYDLSFLKTIQEV  
AGYVLI ALNTVERI PLENLQI IRGNMYIENSYALAVLSNYDANKTGLKELPMRNLQEI LH  
GAVRFSNPALCNVESIQWRDIVSSDFLSNMSMDFQNLHLSGQKCDPSCPNGSCWAGAGE  
NCQKLTKI ICAQQCSGRCRGKSPSDCCHNQCAAGCTGPRESDCLVCRKFRDEATCKDTC  
PLMLYNPTTYQMDVNPPEKYSFGATCVKCKPRNYVVTDHGSCVRA CGADSYEMEEDGVRK  
CKKCEGPRCKVCGIGIEGFKDSLSINATNI KHFKNCTSI SGDLHILPVAFRGDSFTHTP  
PLDPQELDLKTVKEITGFLLIQAWPENRTDLHAFENLEI IRGRTKQHGQFSLAVVSLNI  
TSLGLRSLKEISDGDV IISGNKNLCYANTINWKKLFGTSGQTKI ISNRGENKCKATGQV  
CHALCSPEGCWGPEPRDCVSCRNVSRGRECVDKCKLLEGEPEFVENSEC IQCHPECLPQ  
AMNITCTGRGPDNCCIQAHYIDGPHCVKTCPAGVMGENNTLVWYADAGHVCHLCHPNCT  
YGCTGPGLRGCPT  
CCCCCECCCCCCCCCHHHHHHHHHHHCCCCCEEECEEECEEECCCCCCCCCHHHHHCCCE  
CCCEEECCCCCCCCCCCCCCCCCCCCCEEEEECEEECEEECCCCCEEECCCCCEEECC  
CEEEEECCCCCHHHHHHHHHCCCCCHHHCEEECCCCCCCCCCCCCCCCCHHHCECCCCCH  
HECCCCCCCCCCCCCCCCCECHHHHECCCCCEEECCCCCCCCCEEECEEECCCCCEEECC  
CEEEEECCCCCEEECEEECEEECEEECEEECCCCCEEECEEECEEECCCCCEEECEEE  
EECCCCCCCCCEEECECHHHHECCCCCCCCCHHHHHCCCCCEEECEEECHHHHHCEHHHCEC

CCCHHHHHHHHCCCECCCEEECCCCCCCCCHHHCCCECCCECCCEEEEEECCCC  
CCCCCCCCCECCCEEEEEECCCCCCCCCHHHCECCCCCEEECECCHHHHHHCCCC  
CCCCCCCCCECCCHHHECCCECCCECCCECCCCCCCCCEEEEEECEEEEEECCCCCECC  
CCCCCECCCCCECCCEEECEEECCCCCEEECCCHHHCCEEEEEECCCEEECCCCCCC  
CCCCCCHHHCCC  
841731302734363465345003204830560210220000020239270400430310  
100000020003300013020000753047210000020428881003200011001014  
000300501000106301080002881395233425364493692387029500002426  
010410343235417400526368120350000007068153140034240753036401  
324103583334371841112161102761339200178031366268825627597112  
038196427440300445507926001150065065000040102010102622885814  
506363031032041010000001017935100002304103074213830000001030  
20000120640230200000032000430506501849606220000305550765834  
238201930000341301132251125940055034536430003486401712700463  
686300616225315522432034103761153230596541201238752046038607  
8118133690289

>1z2b A

RECISIHVGQAGVQIGNACWELYCLEHGIQPDGQMPXXXXXXXXXDSFNTFFSETGAGKH  
VPRAVFVBLEPTVIDEVRTGTYRQLFHPEQLITGKEDAANNYARGHYTIGKEIIDLVLDR  
IRKLADQCTGLQGFLVFSHFGGGTSGGFTSLLMERLSVDYGKKSLEFSIYPAPQVSTAV  
VEPYNSILTTHTTLEHSDCAFMDNEAIYDICRRNLDIERTYTNLNRLIGQIVSSITAS  
LRPFDGALNVDLTFEQTNLVVPYPRIFHPLATYAPVISA EKAYHEQLSVAEITNA CFEPANQ  
MVKCDPRHGKYMACCLLYRGDVPKDVNAAIATIKTKRSIQFVDW CPTGFKVGINYQPPT  
VVPGGDLAKVQRAV CMLSNNTTAIAEAWARLDHKFDLMYAKRAFWHWYVGEEMEEGEFSEA  
REDMAALEKDYEEVGI

CEEEEEEEHHHHHHHHHHHHHHHHHHHHHHCCCCCCCCXXXXXXXXXXCCCCCECCCCCCCC  
CECEEEEECCCCHHHHHHCCCCCCCCCHHHHEEECCCCCCCCCHHHHHCCCCHHHHHHHHHH  
HHHHCCCCCEEEEEEECCCCHHHHHHHHHHHHHHCCCCCEEEEEEECCCCCCCCC  
CHHHHHHHHHHHHHCCCCCEEEEECCCCHHHHHHHHHHHHCCCCCCCCCHHHHHHHHHHHHHCH  
HHCCCCCCCCCHHHHHHHCCCCCCCCCECCCCCCCCCCCCCCCCCHHHHHHHHCCCCHHHC  
CCCCCCCCCEEEEEEECCCCCHHHHHHHHHHHHHCCCCCECCCCCCCCCEEEEEEECCCCC  
CCCCCECCCCCEEEEEEHHHHHHHHHHHHHHHHHHHHHHCCCCCCCCHHHHCCCCCHHHHHHH  
HHHHHHHHHHHHCCCC

500000000320030021001000030150535025999999999999682300013199641  
000000000025104303747154004740002261000100000001102720640062  
055017518601000000100110000000000220134077210000000103314100  
0000000000110060030000000100110055108262053500020000000000  
101400003305102610044820000000000030273396833403600620235110  
004130361400100000006051730241016107425511052131211000042503  
10892300714200000001001200240062042005230001103310054400560  
1720330363087054

>2btp A

MHHHHHSSGVDLGTENLYFQSMKTELIQKAKLAEQAERYDDMATCMKAVTEQGAELSN  
EERNLLSVAYKNVVGGRRSAWVIVSSIEQKTXKXKXKLQLIKDYREKVESELRSICTTVL  
ELLDKYLIA NATNPESKVFY LKMKG DYFRYLA EVA CGDDR KQTIDNSQ GAYQEAFDISKK  
EMQPTHPIRLGLALNFSVFFYEILNNPELACTLAKTAFDEATAELD'TLNEDSYKDSTLIM  
QLLRDNLTLWTS

CCCCCECCCCCECCCCHHHHCCCCHHHHHHHHHHHHHHCCCCHHHHHHHHHHHHCCCCCCH  
HHHHHHHHHHHHHHHHHHHHHHHHHHHHHHHHHHHCCCCCHHHHHHHHHHHHHHHHHHHHH  
HHHHHHCCCCCCCCCHHHHHHHHHHHHHHHHHHHHHHCCCCCHHHHHHHHHHHHHHHHHHH  
HCCCCCHHHHHHHHHHHHHHHHHHHHHHHHHHHHHHHHHHHHHHHHHHHHHHHHHHHHH  
HHHHHHHHHHCCC

036152443353620437307716364003003003506124000000100024343045  
510400120033103510301520262258899996243201611440060033005200  
600542025408432010000002000100101006896322017402500350152054  
607102211000000000012302643750161034115505610972694242502500  
500550165079

>1z7x W  
SLDIQSLLDIQCEELSDARWAEELPLLQCCQVVRLLDDCGLTEARCKDISSALRVNPALAE  
NLRSNELGQDVGVHCVLQGLQTPSCKIQKLSLQNCCLTGAGCGVLSSTLRTLPQLQELHLS  
DNLGDAQLQLLCEGLLDQPQRLEKQLLEYCSLSAASCEPLASVLRAPDFKELTVSNND  
INEAGVRVLCQGLKDSPCQLEALKLES CGVTS DNCRDL CGIVASKASLRELALGSKNLGD  
VGM AELCPGLLHPSSRLRTLWIWECGITAKGCGDLRCVLRAKE SLKELSLAGNELGDEGA  
RLLCETLLEPGCQLES LWKSCSFTAACCSHFSSVLAQNRFLLELQISNNRLEDAGVREL  
CQGLGQPGSVLRVWLADCDVSDSSCSLAATLLANHSLRELDLSNNCLGDAGILQLVES  
VRQPGCLLEQLVLYDIYWSEEMEDRLQALEKDKPSLRVIS  
CEEEEEEEECCECHHHHHHHHHHHHCCCEEEEEECCECHHHHHHHHHHHHCCCCCEE  
ECCCCCHHHHHHHHHHHHCCCCCCCCCEEECCCCCEHHHHHHHHHHHCCCCCCCCCEEECC  
CECHHHHHHHHHHHHCCCCCCCCCEEECCCCCEHHHHHHHHHHHHHCCCCCEEECCCCCE  
CHHHHHHHHHHHHHHCCCCCCCCCEEECCCCCECHHHHHHHHHHHHCCCCCEEECCCCCECH  
HHHHHHHHHHHCCCCCCCCCEEECCCCCHHHHHHHHHHHHCCCCCEEECCCCCHHHHH  
HHHHHHHCCCCCCCCCEEECCCCCEHHHHHHHHHHHHHCCCCCEEECCCCCECHHHHHHH  
HHHHHHHCCCCCCCCCEEECCCCCHHHHHHHHHHHHHHCCCCCEEECCCCCHHHHHHHHH  
HCCCCCCCCCEEECCCCCHHHHHHHHHHHHHHCCCCCEEE

533202010111805851056024004404103001030445105400600450540110  
102208022500310040052931504400013040337004200500450220210100  
206022600430050041740200301025060234005100200540120100000206  
043300410050055050202002012040225006301100150310420000309021  
500320040044740105000003070426002100600540200110000307023400  
320040033830003000003050425004301300160420010000207032500520  
050025861104001003030326005100510350320120000103003500330040  
0646300031000020001270154053037603204102

>1zng O  
KVKVGVNGFGRIGRLVTRAAFNSGKVDI VAINDPFIDLNYMVYMFQYDSTHGKFGHTVKA  
ENGKLVINGNPI TIFQERDPSKI KWGDAGAEYVVESTGVFTTMEKAG AHLQGGAKRVIIS  
APSADAPMFVMGVNHEKYDNSLKIISNASCTTNCLAPLAKVIHDNFGIVEGLMTTVHAIT  
ATQKTVDGPGSKLWRDGRGALQNIIPASTGA AKAVGKVIPELNGKLTGMAFRVPTANVSV  
VDLTCRLKPKAKYDDIKRVVKQASEGPLKGI LGYTEHQVVSDFNSDTHSSTFDAGAGIA  
LNDHFVKLISWYDNEFGYSNRVVDLMAHMASKE  
CEEEEEECCECHHHHHHHHHHHHCCCEEEEEECCECHHHHHHHHHHCCCCCCCCCEEE  
ECCCEEEECCEEEECCECHHHHCHHHHCCCEEEECCECHHHHCHHHHCCCCCEEEEC  
CCCCCCECCCCCHHHCCCCCEEECCCHHHHHHHHHHHHHHCEEEEEEEEEECC  
CCCCCCCCCCCCCHHHHCCCCCEEEECCHHHHHHHHCHHHCCCCCEEEEEEECCCCCE  
EEEEEEECCECHHHHHHHHHHHHCCCCCEEEECCECHHHHCCCCCEEEECCEEE  
CCCCEEEEEEECCHHHHHHHHHHHHHHCCC

805000000312000001001843404010001260416001000100010450944053  
597401047450211447402605048140300001375132485011038230500001  
2418503100121016604472510000120000000030015401020000000002  
660400022289420100001200001726007100600560574010000100010000  
000002076606164026104711648074000115430001204323200000060123  
22320000000000100010001002102746
