# Supplementary material for: Comprehensive Identification and Modified-Site Mapping of S-Nitrosylated Targets in Prostate Epithelial Cells
Source: PubMed Central journal article supplement (PMC2816712; doi:10.1371/journal.pone.0009075), 2010-02-05
Supplement: pone.0009075.s004.pdf [file pone.0009075.s004.pdf]

| chain1 | res1/atm1                  | distance | res2/atm2                   | chain2 | H-bonding                                                                                                               | Charge interaction |
|--------|----------------------------|----------|-----------------------------|--------|-------------------------------------------------------------------------------------------------------------------------|--------------------|
| 2PKTA  | <a href="#">CYS73</a> (C)  | 4.36     | <a href="#">TRP14</a> (CZ2) | 2PKTA  |                                                                                                                         | C[ ] ... C[ ]      |
| 2PKTA  | <a href="#">CYS73</a> (O)  | 4.29     | <a href="#">TRP14</a> (NE1) | 2PKTA  | [D-A-AA]:147.7° [A-D-DD]:167.1° d_planarity:-62.1°<br>a_planarity:-28.4°, maximum distance exceeded,<br>bad d_planarity | O[ ] ... N[ ]      |
| 2PKTA  | <a href="#">CYS73</a> (O)  | 4.21     | <a href="#">TRP14</a> (CE2) | 2PKTA  |                                                                                                                         | O[ ] ... C[ ]      |
| 2PKTA  | <a href="#">CYS73</a> (O)  | 3.42     | <a href="#">TRP14</a> (CZ2) | 2PKTA  |                                                                                                                         | O[ ] ... C[ ]      |
| 2PKTA  | <a href="#">CYS73</a> (O)  | 4.36     | <a href="#">TRP14</a> (CH2) | 2PKTA  |                                                                                                                         | O[ ] ... C[ ]      |
| 2PKTA  | <a href="#">CYS73</a> (CB) | 4.46     | <a href="#">TRP14</a> (CZ2) | 2PKTA  |                                                                                                                         | C[ ] ... C[ ]      |
| 2PKTA  | <a href="#">CYS73</a> (SG) | 4.41     | <a href="#">ASP54</a> (CG)  | 2PKTA  |                                                                                                                         | S[ ] ... C[ ]      |
| 2PKTA  | <a href="#">CYS73</a> (SG) | 4.65     | <a href="#">ASP54</a> (OD1) | 2PKTA  | negative                                                                                                                |                    |
| 2PKTA  | <a href="#">CYS73</a> (SG) | 3.55     | <a href="#">ASP54</a> (OD2) | 2PKTA  |                                                                                                                         | S[ ] ... O[-]      |
| 2PKTA  | <a href="#">CYS73</a> (N)  | 4.72     | <a href="#">ARG69</a> (C)   | 2PKTA  |                                                                                                                         |                    |
| 2PKTA  | <a href="#">CYS73</a> (N)  | 3.69     | <a href="#">ARG69</a> (O)   | 2PKTA  | [D-A-AA]:141.5° [A-D-DD]:120.2° d_planarity:-53.4°<br>a_planarity:55.9°, maximum distance exceeded                      | N[ ] ... O[ ]      |
| 2PKTA  | <a href="#">CYS73</a> (CA) | 4.60     | <a href="#">ARG69</a> (O)   | 2PKTA  |                                                                                                                         |                    |
| 2PKTA  | <a href="#">CYS73</a> (CB) | 4.35     | <a href="#">ARG69</a> (O)   | 2PKTA  |                                                                                                                         | C[ ] ... O[ ]      |
| 2PKTA  | <a href="#">CYS73</a> (SG) | 4.33     | <a href="#">ARG69</a> (C)   | 2PKTA  |                                                                                                                         | S[ ] ... C[ ]      |
| 2PKTA  | <a href="#">CYS73</a> (SG) | 3.27     | <a href="#">ARG69</a> (O)   | 2PKTA  | Positive                                                                                                                | S[ ] ... O[ ]      |
| 2PKTA  | <a href="#">CYS73</a> (N)  | 4.74     | <a href="#">ILE70</a> (CA)  | 2PKTA  |                                                                                                                         |                    |
| 2PKTA  | <a href="#">CYS73</a> (N)  | 3.82     | <a href="#">ILE70</a> (C)   | 2PKTA  |                                                                                                                         | N[ ] ... C[ ]      |
| 2PKTA  | <a href="#">CYS73</a> (N)  | 3.13     | <a href="#">ILE70</a> (O)   | 2PKTA  | <b>H-bond</b> [D-A-AA]:115.7° [A-D-DD]:103.3° d_planarity:-12.0°<br>a_planarity:78.1°                                   | N[ ] ... O[ ]      |
| 2PKTA  | <a href="#">CYS73</a> (CA) | 4.68     | <a href="#">ILE70</a> (C)   | 2PKTA  |                                                                                                                         |                    |
| 2PKTA  | <a href="#">CYS73</a> (CA) | 3.74     | <a href="#">ILE70</a> (O)   | 2PKTA  |                                                                                                                         | C[ ] ... O[ ]      |
| 2PKTA  | <a href="#">CYS73</a> (C)  | 4.22     | <a href="#">ILE70</a> (O)   | 2PKTA  |                                                                                                                         | C[ ] ... O[ ]      |
| 2PKTA  | <a href="#">CYS73</a> (O)  | 3.82     | <a href="#">ILE70</a> (O)   | 2PKTA  |                                                                                                                         | O[ ] ... O[ ]      |
| 2PKTA  | <a href="#">CYS73</a> (CB) | 4.80     | <a href="#">ILE70</a> (CA)  | 2PKTA  |                                                                                                                         |                    |
| 2PKTA  | <a href="#">CYS73</a> (CB) | 4.37     | <a href="#">ILE70</a> (C)   | 2PKTA  |                                                                                                                         | C[ ] ... C[ ]      |
| 2PKTA  | <a href="#">CYS73</a> (CB) | 3.42     | <a href="#">ILE70</a> (O)   | 2PKTA  |                                                                                                                         | C[ ] ... O[ ]      |
| 2PKTA  | <a href="#">CYS73</a> (SG) | 4.79     | <a href="#">ILE70</a> (N)   | 2PKTA  | [D-A-AA]:108.7° [A-D-DD]:61.8° d_planarity:17.7°, maximum<br>distance exceeded, bad d_angle(sp2)                        |                    |
| 2PKTA  | <a href="#">CYS73</a> (SG) | 4.30     | <a href="#">ILE70</a> (CA)  | 2PKTA  |                                                                                                                         | S[ ] ... C[ ]      |
| 2PKTA  | <a href="#">CYS73</a> (SG) | 4.38     | <a href="#">ILE70</a> (C)   | 2PKTA  |                                                                                                                         | S[ ] ... C[ ]      |
| 2PKTA  | <a href="#">CYS73</a> (SG) | 3.85     | <a href="#">ILE70</a> (O)   | 2PKTA  |                                                                                                                         | S[ ] ... O[ ]      |
| 2PKTA  | <a href="#">CYS73</a> (N)  | 4.33     | <a href="#">LYS71</a> (N)   | 2PKTA  |                                                                                                                         | N[ ] ... N[ ]      |
| 2PKTA  | <a href="#">CYS73</a> (N)  | 4.25     | <a href="#">LYS71</a> (CA)  | 2PKTA  |                                                                                                                         | N[ ] ... C[ ]      |
| 2PKTA  | <a href="#">CYS73</a> (N)  | 3.20     | <a href="#">LYS71</a> (C)   | 2PKTA  |                                                                                                                         | N[ ] ... C[ ]      |
| 2PKTA  | <a href="#">CYS73</a> (N)  | 3.43     | <a href="#">LYS71</a> (O)   | 2PKTA  | [D-A-AA]:69.0° [A-D-DD]:131.4° d_planarity:-88.3°<br>a_planarity:50.3°, bad a_angle(sp2), bad d_planarity               | N[ ] ... O[ ]      |
| 2PKTA  | <a href="#">CYS73</a> (CA) | 4.49     | <a href="#">LYS71</a> (C)   | 2PKTA  |                                                                                                                         | C[ ] ... C[ ]      |
| 2PKTA  | <a href="#">CYS73</a> (CA) | 4.53     | <a href="#">LYS71</a> (O)   | 2PKTA  |                                                                                                                         |                    |
| 2PKTA  | <a href="#">CYS73</a> (C)  | 4.74     | <a href="#">LYS71</a> (C)   | 2PKTA  |                                                                                                                         |                    |
| 2PKTA  | <a href="#">CYS73</a> (C)  | 4.43     | <a href="#">LYS71</a> (O)   | 2PKTA  |                                                                                                                         | C[ ] ... O[ ]      |
| 2PKTA  | <a href="#">CYS73</a> (O)  | 4.68     | <a href="#">LYS71</a> (C)   | 2PKTA  |                                                                                                                         |                    |
| 2PKTA  | <a href="#">CYS73</a> (O)  | 4.34     | <a href="#">LYS71</a> (O)   | 2PKTA  |                                                                                                                         | O[ ] ... O[ ]      |
| 2PKTA  | <a href="#">CYS73</a> (N)  | 2.74     | <a href="#">GLY72</a> (N)   | 2PKTA  |                                                                                                                         | N[ ] ... N[ ]      |
| 2PKTA  | <a href="#">CYS73</a> (N)  | 2.43     | <a href="#">GLY72</a> (CA)  | 2PKTA  |                                                                                                                         | N[ ] ... C[ ]      |
| 2PKTA  | <a href="#">CYS73</a> (N)  | 2.24     | <a href="#">GLY72</a> (O)   | 2PKTA  | [D-A-AA]:30.0° [A-D-DD]:94.3° d_planarity:0.4°<br>a_planarity:0.6°, bad a_angle(sp2)                                    | N[ ] ... O[ ]      |

|       |                            |      |                             |       |                                                                                                                 |               |
|-------|----------------------------|------|-----------------------------|-------|-----------------------------------------------------------------------------------------------------------------|---------------|
| 2PKTA | <a href="#">CYS73</a> (CA) | 4.19 | <a href="#">GLY72</a> (N)   | 2PKTA |                                                                                                                 | C[ ] ... N[ ] |
| 2PKTA | <a href="#">CYS73</a> (CA) | 3.81 | <a href="#">GLY72</a> (CA)  | 2PKTA |                                                                                                                 | C[ ] ... C[ ] |
| 2PKTA | <a href="#">CYS73</a> (CA) | 2.44 | <a href="#">GLY72</a> (C)   | 2PKTA |                                                                                                                 | C[ ] ... C[ ] |
| 2PKTA | <a href="#">CYS73</a> (CA) | 2.77 | <a href="#">GLY72</a> (O)   | 2PKTA |                                                                                                                 | C[ ] ... O[ ] |
| 2PKTA | <a href="#">CYS73</a> (C)  | 4.84 | <a href="#">GLY72</a> (N)   | 2PKTA |                                                                                                                 |               |
| 2PKTA | <a href="#">CYS73</a> (C)  | 4.52 | <a href="#">GLY72</a> (CA)  | 2PKTA |                                                                                                                 |               |
| 2PKTA | <a href="#">CYS73</a> (C)  | 3.20 | <a href="#">GLY72</a> (C)   | 2PKTA |                                                                                                                 | C[ ] ... C[ ] |
| 2PKTA | <a href="#">CYS73</a> (C)  | 3.33 | <a href="#">GLY72</a> (O)   | 2PKTA |                                                                                                                 | C[ ] ... O[ ] |
| 2PKTA | <a href="#">CYS73</a> (O)  | 3.97 | <a href="#">GLY72</a> (C)   | 2PKTA |                                                                                                                 | O[ ] ... C[ ] |
| 2PKTA | <a href="#">CYS73</a> (O)  | 4.33 | <a href="#">GLY72</a> (O)   | 2PKTA |                                                                                                                 | O[ ] ... O[ ] |
| 2PKTA | <a href="#">CYS73</a> (CB) | 4.88 | <a href="#">GLY72</a> (N)   | 2PKTA |                                                                                                                 |               |
| 2PKTA | <a href="#">CYS73</a> (CB) | 4.83 | <a href="#">GLY72</a> (CA)  | 2PKTA |                                                                                                                 |               |
| 2PKTA | <a href="#">CYS73</a> (CB) | 3.67 | <a href="#">GLY72</a> (C)   | 2PKTA |                                                                                                                 | C[ ] ... C[ ] |
| 2PKTA | <a href="#">CYS73</a> (CB) | 4.18 | <a href="#">GLY72</a> (O)   | 2PKTA |                                                                                                                 | C[ ] ... O[ ] |
| 2PKTA | <a href="#">CYS73</a> (SG) | 4.99 | <a href="#">GLY72</a> (CA)  | 2PKTA |                                                                                                                 |               |
| 2PKTA | <a href="#">CYS73</a> (SG) | 4.12 | <a href="#">GLY72</a> (C)   | 2PKTA |                                                                                                                 | S[ ] ... C[ ] |
| 2PKTA | <a href="#">CYS73</a> (SG) | 4.71 | <a href="#">GLY72</a> (O)   | 2PKTA |                                                                                                                 |               |
| 2PKTA | <a href="#">CYS73</a> (N)  | 3.30 | <a href="#">THR74</a> (N)   | 2PKTA |                                                                                                                 | N[ ] ... N[ ] |
| 2PKTA | <a href="#">CYS73</a> (N)  | 4.59 | <a href="#">THR74</a> (CA)  | 2PKTA |                                                                                                                 |               |
| 2PKTA | <a href="#">CYS73</a> (N)  | 4.91 | <a href="#">THR74</a> (OG1) | 2PKTA | [D-A-AA]:100.6° [A-D-DD]:75.8° d_planarity:46.2°, maximum distance exceeded, bad d_angle(sp2)                   |               |
| 2PKTA | <a href="#">CYS73</a> (CA) | 2.43 | <a href="#">THR74</a> (N)   | 2PKTA |                                                                                                                 | C[ ] ... N[ ] |
| 2PKTA | <a href="#">CYS73</a> (CA) | 3.81 | <a href="#">THR74</a> (CA)  | 2PKTA |                                                                                                                 | C[ ] ... C[ ] |
| 2PKTA | <a href="#">CYS73</a> (CA) | 4.59 | <a href="#">THR74</a> (C)   | 2PKTA |                                                                                                                 |               |
| 2PKTA | <a href="#">CYS73</a> (CA) | 4.82 | <a href="#">THR74</a> (CB)  | 2PKTA |                                                                                                                 |               |
| 2PKTA | <a href="#">CYS73</a> (CA) | 4.76 | <a href="#">THR74</a> (OG1) | 2PKTA |                                                                                                                 |               |
| 2PKTA | <a href="#">CYS73</a> (C)  | 2.44 | <a href="#">THR74</a> (CA)  | 2PKTA |                                                                                                                 | C[ ] ... C[ ] |
| 2PKTA | <a href="#">CYS73</a> (C)  | 3.29 | <a href="#">THR74</a> (C)   | 2PKTA |                                                                                                                 | C[ ] ... C[ ] |
| 2PKTA | <a href="#">CYS73</a> (C)  | 3.98 | <a href="#">THR74</a> (O)   | 2PKTA |                                                                                                                 | C[ ] ... O[ ] |
| 2PKTA | <a href="#">CYS73</a> (C)  | 3.66 | <a href="#">THR74</a> (CB)  | 2PKTA |                                                                                                                 | C[ ] ... C[ ] |
| 2PKTA | <a href="#">CYS73</a> (C)  | 3.81 | <a href="#">THR74</a> (OG1) | 2PKTA |                                                                                                                 | C[ ] ... O[ ] |
| 2PKTA | <a href="#">CYS73</a> (C)  | 4.89 | <a href="#">THR74</a> (CG2) | 2PKTA |                                                                                                                 |               |
| 2PKTA | <a href="#">CYS73</a> (O)  | 2.25 | <a href="#">THR74</a> (N)   | 2PKTA | [D-A-AA]:29.6° [A-D-DD]:95.1° d_planarity:0.1° a_planarity:0.4°, bad a_angle(sp2)                               | O[ ] ... N[ ] |
| 2PKTA | <a href="#">CYS73</a> (O)  | 2.79 | <a href="#">THR74</a> (CA)  | 2PKTA |                                                                                                                 | O[ ] ... C[ ] |
| 2PKTA | <a href="#">CYS73</a> (O)  | 3.50 | <a href="#">THR74</a> (C)   | 2PKTA |                                                                                                                 | O[ ] ... C[ ] |
| 2PKTA | <a href="#">CYS73</a> (O)  | 3.82 | <a href="#">THR74</a> (O)   | 2PKTA |                                                                                                                 | O[ ] ... O[ ] |
| 2PKTA | <a href="#">CYS73</a> (O)  | 4.16 | <a href="#">THR74</a> (CB)  | 2PKTA |                                                                                                                 | O[ ] ... C[ ] |
| 2PKTA | <a href="#">CYS73</a> (O)  | 4.34 | <a href="#">THR74</a> (OG1) | 2PKTA | [D-A-AA]:57.0° [A-D-DD]:73.2° a_planarity:36.9°, maximum distance exceeded, bad a_angle(sp2)                    | O[ ] ... O[ ] |
| 2PKTA | <a href="#">CYS73</a> (CB) | 3.59 | <a href="#">THR74</a> (N)   | 2PKTA |                                                                                                                 | C[ ] ... N[ ] |
| 2PKTA | <a href="#">CYS73</a> (CB) | 4.83 | <a href="#">THR74</a> (CA)  | 2PKTA |                                                                                                                 |               |
| 2PKTA | <a href="#">CYS73</a> (CA) | 4.83 | <a href="#">ASP75</a> (N)   | 2PKTA |                                                                                                                 |               |
| 2PKTA | <a href="#">CYS73</a> (C)  | 3.84 | <a href="#">ASP75</a> (N)   | 2PKTA |                                                                                                                 | C[ ] ... N[ ] |
| 2PKTA | <a href="#">CYS73</a> (O)  | 4.35 | <a href="#">ASP75</a> (N)   | 2PKTA | [D-A-AA]:58.0° [A-D-DD]:139.0° d_planarity:54.5° a_planarity:35.3°, maximum distance exceeded, bad a_angle(sp2) | O[ ] ... N[ ] |
| 2PKTA | <a href="#">CYS73</a> (CA) | 4.16 | <a href="#">ASN76</a> (O)   | 2PKTA |                                                                                                                 | C[ ] ... O[ ] |
| 2PKTA | <a href="#">CYS73</a> (C)  | 4.74 | <a href="#">ASN76</a> (N)   | 2PKTA |                                                                                                                 |               |
| 2PKTA | <a href="#">CYS73</a> (C)  | 4.44 | <a href="#">ASN76</a> (O)   | 2PKTA |                                                                                                                 | C[ ] ... O[ ] |

|       |                           |      |                            |       |        |               |
|-------|---------------------------|------|----------------------------|-------|--------|---------------|
| 2PKTA | <a href="#">CYS73(O)</a>  | 4.86 | <a href="#">ASN76(O)</a>   | 2PKTA |        |               |
| 2PKTA | <a href="#">CYS73(CB)</a> | 4.19 | <a href="#">ASN76(C)</a>   | 2PKTA |        | C[ ] ... C[ ] |
| 2PKTA | <a href="#">CYS73(CB)</a> | 3.39 | <a href="#">ASN76(O)</a>   | 2PKTA |        | C[ ] ... O[ ] |
| 2PKTA | <a href="#">CYS73(SG)</a> | 4.99 | <a href="#">ASN76(C)</a>   | 2PKTA |        |               |
| 2PKTA | <a href="#">CYS73(SG)</a> | 4.04 | <a href="#">ASN76(O)</a>   | 2PKTA |        | S[ ] ... O[ ] |
| 2PKTA | <a href="#">CYS73(CB)</a> | 4.62 | <a href="#">LEU77(N)</a>   | 2PKTA |        |               |
| 2PKTA | <a href="#">CYS73(CB)</a> | 4.31 | <a href="#">LEU77(CA)</a>  | 2PKTA |        | C[ ] ... C[ ] |
| 2PKTA | <a href="#">CYS73(CB)</a> | 4.16 | <a href="#">LEU77(CB)</a>  | 2PKTA |        | C[ ] ... C[ ] |
| 2PKTA | <a href="#">CYS73(CB)</a> | 4.69 | <a href="#">LEU77(CG)</a>  | 2PKTA |        |               |
| 2PKTA | <a href="#">CYS73(CB)</a> | 4.06 | <a href="#">LEU77(CD1)</a> | 2PKTA |        | C[ ] ... C[ ] |
| 2PKTA | <a href="#">CYS73(SG)</a> | 4.54 | <a href="#">LEU77(CA)</a>  | 2PKTA |        |               |
| 2PKTA | <a href="#">CYS73(SG)</a> | 4.57 | <a href="#">LEU77(CB)</a>  | 2PKTA |        |               |
| 2PKTA | <a href="#">CYS73(SG)</a> | 4.66 | <a href="#">LEU77(CG)</a>  | 2PKTA |        |               |
| 2PKTA | <a href="#">CYS73(SG)</a> | 3.53 | <a href="#">LEU77(CD1)</a> | 2PKTA |        | S[ ] ... C[ ] |
| 2PKTA | <a href="#">CYS73(CA)</a> | 4.91 | <a href="#">CA201(CA)</a>  | 2PKTA |        |               |
| 2PKTA | <a href="#">CYS73(CB)</a> | 4.52 | <a href="#">CA201(CA)</a>  | 2PKTA |        |               |
| 2PKTA | <a href="#">CYS73(SG)</a> | 4.55 | <a href="#">CA201(CA)</a>  | 2PKTA | ligand |               |

Site: weak positive, negative, ligand

| chain1 | res1/atm1                  | distance | res2/atm2                  | chain2 | H-bonding                                                                                     | Charge interaction |
|--------|----------------------------|----------|----------------------------|--------|-----------------------------------------------------------------------------------------------|--------------------|
| 1TUBB  | <a href="#">CYS241(N)</a>  | 4.83     | <a href="#">SER236(CA)</a> | 1TUBB  |                                                                                               |                    |
| 1TUBB  | <a href="#">CYS241(N)</a>  | 3.69     | <a href="#">SER236(C)</a>  | 1TUBB  |                                                                                               | N[ ] ... C[ ]      |
| 1TUBB  | <a href="#">CYS241(N)</a>  | 2.50     | <a href="#">SER236(O)</a>  | 1TUBB  | <b>H-bond</b> [D-A-AA]:164.4° [A-D-DD]:124.8° d_planarity:-29.1° a_planarity:20.8°            | N[ ] ... O[ ]      |
| 1TUBB  | <a href="#">CYS241(CA)</a> | 4.61     | <a href="#">SER236(C)</a>  | 1TUBB  |                                                                                               |                    |
| 1TUBB  | <a href="#">CYS241(CA)</a> | 3.53     | <a href="#">SER236(O)</a>  | 1TUBB  |                                                                                               | C[ ] ... O[ ]      |
| 1TUBB  | <a href="#">CYS241(C)</a>  | 4.69     | <a href="#">SER236(O)</a>  | 1TUBB  |                                                                                               |                    |
| 1TUBB  | <a href="#">CYS241(O)</a>  | 4.80     | <a href="#">SER236(O)</a>  | 1TUBB  |                                                                                               |                    |
| 1TUBB  | <a href="#">CYS241(CB)</a> | 4.27     | <a href="#">SER236(C)</a>  | 1TUBB  |                                                                                               | C[ ] ... C[ ]      |
| 1TUBB  | <a href="#">CYS241(CB)</a> | 3.48     | <a href="#">SER236(O)</a>  | 1TUBB  |                                                                                               | C[ ] ... O[ ]      |
| 1TUBB  | <a href="#">CYS241(SG)</a> | 4.81     | <a href="#">SER236(CA)</a> | 1TUBB  |                                                                                               |                    |
| 1TUBB  | <a href="#">CYS241(SG)</a> | 3.44     | <a href="#">SER236(C)</a>  | 1TUBB  |                                                                                               | S[ ] ... C[ ]      |
| 1TUBB  | <a href="#">CYS241(SG)</a> | 2.92     | <a href="#">SER236(O)</a>  | 1TUBB  |                                                                                               | S[ ] ... O[ ]      |
| 1TUBB  | <a href="#">CYS241(SG)</a> | 4.88     | <a href="#">SER236(OG)</a> | 1TUBB  | [D-A-AA]:139.9° [A-D-DD]:87.8°, <b>maximum distance exceeded</b>                              |                    |
| 1TUBB  | <a href="#">CYS241(N)</a>  | 4.35     | <a href="#">GLY237(N)</a>  | 1TUBB  |                                                                                               | N[ ] ... N[ ]      |
| 1TUBB  | <a href="#">CYS241(N)</a>  | 4.07     | <a href="#">GLY237(CA)</a> | 1TUBB  |                                                                                               | N[ ] ... C[ ]      |
| 1TUBB  | <a href="#">CYS241(N)</a>  | 3.68     | <a href="#">GLY237(C)</a>  | 1TUBB  |                                                                                               | N[ ] ... C[ ]      |
| 1TUBB  | <a href="#">CYS241(N)</a>  | 3.12     | <a href="#">GLY237(O)</a>  | 1TUBB  | [D-A-AA]:107.8° [A-D-DD]:73.8° d_planarity:-22.9° a_planarity:-71.4°, <b>bad d_angle(sp2)</b> | N[ ] ... O[ ]      |
| 1TUBB  | <a href="#">CYS241(CA)</a> | 4.97     | <a href="#">GLY237(N)</a>  | 1TUBB  |                                                                                               |                    |
| 1TUBB  | <a href="#">CYS241(CA)</a> | 4.29     | <a href="#">GLY237(CA)</a> | 1TUBB  |                                                                                               | C[ ] ... C[ ]      |
| 1TUBB  | <a href="#">CYS241(CA)</a> | 3.92     | <a href="#">GLY237(C)</a>  | 1TUBB  |                                                                                               | C[ ] ... C[ ]      |
| 1TUBB  | <a href="#">CYS241(CA)</a> | 3.05     | <a href="#">GLY237(O)</a>  | 1TUBB  |                                                                                               | C[ ] ... O[ ]      |
| 1TUBB  | <a href="#">CYS241(C)</a>  | 4.48     | <a href="#">GLY237(C)</a>  | 1TUBB  |                                                                                               | C[ ] ... C[ ]      |
| 1TUBB  | <a href="#">CYS241(C)</a>  | 3.38     | <a href="#">GLY237(O)</a>  | 1TUBB  |                                                                                               | C[ ] ... O[ ]      |
| 1TUBB  | <a href="#">CYS241(O)</a>  | 4.10     | <a href="#">GLY237(C)</a>  | 1TUBB  |                                                                                               | O[ ] ... C[ ]      |
| 1TUBB  | <a href="#">CYS241(O)</a>  | 2.97     | <a href="#">GLY237(O)</a>  | 1TUBB  |                                                                                               | O[ ] ... O[ ]      |

|       |                             |      |                              |       |                                                                                                                                         |               |
|-------|-----------------------------|------|------------------------------|-------|-----------------------------------------------------------------------------------------------------------------------------------------|---------------|
| 1TUBB | <a href="#">CYS241</a> (CB) | 4.24 | <a href="#">GLY237</a> (N)   | 1TUBB |                                                                                                                                         | C[ ] ... N[ ] |
| 1TUBB | <a href="#">CYS241</a> (CB) | 3.25 | <a href="#">GLY237</a> (CA)  | 1TUBB |                                                                                                                                         | C[ ] ... C[ ] |
| 1TUBB | <a href="#">CYS241</a> (CB) | 3.07 | <a href="#">GLY237</a> (C)   | 1TUBB |                                                                                                                                         | C[ ] ... C[ ] |
| 1TUBB | <a href="#">CYS241</a> (CB) | 2.26 | <a href="#">GLY237</a> (O)   | 1TUBB |                                                                                                                                         | C[ ] ... O[ ] |
| 1TUBB | <a href="#">CYS241</a> (SG) | 3.37 | <a href="#">GLY237</a> (N)   | 1TUBB | [D-A-AA]:106.9° [A-D-DD]:50.2° d_planarity:44.1°,<br>bad d_angle(sp2)                                                                   | S[ ] ... N[ ] |
| 1TUBB | <a href="#">CYS241</a> (SG) | 2.68 | <a href="#">GLY237</a> (CA)  | 1TUBB |                                                                                                                                         | S[ ] ... C[ ] |
| 1TUBB | <a href="#">CYS241</a> (SG) | 3.31 | <a href="#">GLY237</a> (C)   | 1TUBB |                                                                                                                                         | S[ ] ... C[ ] |
| 1TUBB | <a href="#">CYS241</a> (SG) | 3.14 | <a href="#">GLY237</a> (O)   | 1TUBB |                                                                                                                                         | S[ ] ... O[ ] |
| 1TUBB | <a href="#">CYS241</a> (N)  | 4.40 | <a href="#">VAL238</a> (N)   | 1TUBB |                                                                                                                                         | N[ ] ... N[ ] |
| 1TUBB | <a href="#">CYS241</a> (N)  | 4.81 | <a href="#">VAL238</a> (CA)  | 1TUBB |                                                                                                                                         |               |
| 1TUBB | <a href="#">CYS241</a> (N)  | 4.08 | <a href="#">VAL238</a> (C)   | 1TUBB |                                                                                                                                         | N[ ] ... C[ ] |
| 1TUBB | <a href="#">CYS241</a> (N)  | 4.28 | <a href="#">VAL238</a> (O)   | 1TUBB | [D-A-AA]:72.2° [A-D-DD]:101.9° d_planarity:-67.1°<br>a_planarity:65.9°, maximum distance exceeded,<br>bad a_angle(sp2), bad d_planarity | N[ ] ... O[ ] |
| 1TUBB | <a href="#">CYS241</a> (CA) | 4.91 | <a href="#">VAL238</a> (N)   | 1TUBB |                                                                                                                                         |               |
| 1TUBB | <a href="#">CYS241</a> (CA) | 4.77 | <a href="#">VAL238</a> (C)   | 1TUBB |                                                                                                                                         |               |
| 1TUBB | <a href="#">CYS241</a> (CA) | 4.79 | <a href="#">VAL238</a> (O)   | 1TUBB |                                                                                                                                         |               |
| 1TUBB | <a href="#">CYS241</a> (C)  | 4.70 | <a href="#">VAL238</a> (C)   | 1TUBB |                                                                                                                                         |               |
| 1TUBB | <a href="#">CYS241</a> (C)  | 4.34 | <a href="#">VAL238</a> (O)   | 1TUBB |                                                                                                                                         | C[ ] ... O[ ] |
| 1TUBB | <a href="#">CYS241</a> (O)  | 4.75 | <a href="#">VAL238</a> (N)   | 1TUBB | [D-A-AA]:113.1° [A-D-DD]:70.3° d_planarity:24.4°<br>a_planarity:-12.0°, maximum distance exceeded,<br>bad d_angle(sp2)                  |               |
| 1TUBB | <a href="#">CYS241</a> (O)  | 4.47 | <a href="#">VAL238</a> (CA)  | 1TUBB |                                                                                                                                         | O[ ] ... C[ ] |
| 1TUBB | <a href="#">CYS241</a> (O)  | 3.82 | <a href="#">VAL238</a> (C)   | 1TUBB |                                                                                                                                         | O[ ] ... C[ ] |
| 1TUBB | <a href="#">CYS241</a> (O)  | 3.29 | <a href="#">VAL238</a> (O)   | 1TUBB |                                                                                                                                         | O[ ] ... O[ ] |
| 1TUBB | <a href="#">CYS241</a> (CB) | 4.27 | <a href="#">VAL238</a> (N)   | 1TUBB |                                                                                                                                         | C[ ] ... N[ ] |
| 1TUBB | <a href="#">CYS241</a> (CB) | 4.87 | <a href="#">VAL238</a> (CA)  | 1TUBB |                                                                                                                                         |               |
| 1TUBB | <a href="#">CYS241</a> (CB) | 4.80 | <a href="#">VAL238</a> (C)   | 1TUBB |                                                                                                                                         |               |
| 1TUBB | <a href="#">CYS241</a> (SG) | 4.50 | <a href="#">VAL238</a> (N)   | 1TUBB | [D-A-AA]:71.3° [A-D-DD]:129.1° d_planarity:19.6°,<br>maximum distance exceeded                                                          | S[ ] ... N[ ] |
| 1TUBB | <a href="#">CYS241</a> (N)  | 4.22 | <a href="#">THR239</a> (N)   | 1TUBB |                                                                                                                                         | N[ ] ... N[ ] |
| 1TUBB | <a href="#">CYS241</a> (N)  | 4.40 | <a href="#">THR239</a> (CA)  | 1TUBB |                                                                                                                                         | N[ ] ... C[ ] |
| 1TUBB | <a href="#">CYS241</a> (N)  | 3.34 | <a href="#">THR239</a> (C)   | 1TUBB |                                                                                                                                         | N[ ] ... C[ ] |
| 1TUBB | <a href="#">CYS241</a> (N)  | 3.85 | <a href="#">THR239</a> (O)   | 1TUBB | [D-A-AA]:57.1° [A-D-DD]:135.4° d_planarity:60.1°<br>a_planarity:36.2°, maximum distance exceeded,<br>bad a_angle(sp2), bad d_planarity  | N[ ] ... O[ ] |
| 1TUBB | <a href="#">CYS241</a> (CA) | 4.62 | <a href="#">THR239</a> (C)   | 1TUBB |                                                                                                                                         |               |
| 1TUBB | <a href="#">CYS241</a> (CA) | 4.98 | <a href="#">THR239</a> (O)   | 1TUBB |                                                                                                                                         |               |
| 1TUBB | <a href="#">CYS241</a> (C)  | 4.82 | <a href="#">THR239</a> (C)   | 1TUBB |                                                                                                                                         |               |
| 1TUBB | <a href="#">CYS241</a> (C)  | 4.93 | <a href="#">THR239</a> (O)   | 1TUBB |                                                                                                                                         |               |
| 1TUBB | <a href="#">CYS241</a> (O)  | 4.78 | <a href="#">THR239</a> (N)   | 1TUBB | [D-A-AA]:119.9° [A-D-DD]:94.7° d_planarity:34.6°<br>a_planarity:-25.8°, maximum distance exceeded                                       |               |
| 1TUBB | <a href="#">CYS241</a> (O)  | 4.46 | <a href="#">THR239</a> (C)   | 1TUBB |                                                                                                                                         | O[ ] ... C[ ] |
| 1TUBB | <a href="#">CYS241</a> (O)  | 4.59 | <a href="#">THR239</a> (O)   | 1TUBB |                                                                                                                                         |               |
| 1TUBB | <a href="#">CYS241</a> (N)  | 2.86 | <a href="#">THR240</a> (N)   | 1TUBB |                                                                                                                                         | N[ ] ... N[ ] |
| 1TUBB | <a href="#">CYS241</a> (N)  | 2.43 | <a href="#">THR240</a> (CA)  | 1TUBB |                                                                                                                                         | N[ ] ... C[ ] |
| 1TUBB | <a href="#">CYS241</a> (N)  | 2.21 | <a href="#">THR240</a> (O)   | 1TUBB | [D-A-AA]:31.2° [A-D-DD]:88.9° d_planarity:1.4°<br>a_planarity:11.5°, bad a_angle(sp2), bad d_angle(sp2)                                 | N[ ] ... O[ ] |
| 1TUBB | <a href="#">CYS241</a> (N)  | 3.06 | <a href="#">THR240</a> (CB)  | 1TUBB |                                                                                                                                         | N[ ] ... C[ ] |
| 1TUBB | <a href="#">CYS241</a> (N)  | 4.37 | <a href="#">THR240</a> (OG1) | 1TUBB | [D-A-AA]:18.5° [A-D-DD]:147.2° d_planarity:63.1°,<br>maximum distance exceeded, bad a_angle(sp3),                                       | N[ ] ... O[ ] |

|       |                            |      |                             |       | bad d_planarity                                                                                                                         |               |
|-------|----------------------------|------|-----------------------------|-------|-----------------------------------------------------------------------------------------------------------------------------------------|---------------|
| 1TUBB | <a href="#">CYS241(N)</a>  | 3.58 | <a href="#">THR240(CG2)</a> | 1TUBB |                                                                                                                                         | N[ ] ... C[ ] |
| 1TUBB | <a href="#">CYS241(CA)</a> | 4.29 | <a href="#">THR240(N)</a>   | 1TUBB |                                                                                                                                         | C[ ] ... N[ ] |
| 1TUBB | <a href="#">CYS241(CA)</a> | 3.75 | <a href="#">THR240(CA)</a>  | 1TUBB |                                                                                                                                         | C[ ] ... C[ ] |
| 1TUBB | <a href="#">CYS241(CA)</a> | 2.37 | <a href="#">THR240(C)</a>   | 1TUBB |                                                                                                                                         | C[ ] ... C[ ] |
| 1TUBB | <a href="#">CYS241(CA)</a> | 2.62 | <a href="#">THR240(O)</a>   | 1TUBB |                                                                                                                                         | C[ ] ... O[ ] |
| 1TUBB | <a href="#">CYS241(CA)</a> | 4.26 | <a href="#">THR240(CB)</a>  | 1TUBB |                                                                                                                                         | C[ ] ... C[ ] |
| 1TUBB | <a href="#">CYS241(CA)</a> | 4.39 | <a href="#">THR240(CG2)</a> | 1TUBB |                                                                                                                                         | C[ ] ... C[ ] |
| 1TUBB | <a href="#">CYS241(C)</a>  | 4.88 | <a href="#">THR240(N)</a>   | 1TUBB |                                                                                                                                         |               |
| 1TUBB | <a href="#">CYS241(C)</a>  | 4.48 | <a href="#">THR240(CA)</a>  | 1TUBB |                                                                                                                                         | C[ ] ... C[ ] |
| 1TUBB | <a href="#">CYS241(C)</a>  | 3.03 | <a href="#">THR240(C)</a>   | 1TUBB |                                                                                                                                         | C[ ] ... C[ ] |
| 1TUBB | <a href="#">CYS241(C)</a>  | 2.94 | <a href="#">THR240(O)</a>   | 1TUBB |                                                                                                                                         | C[ ] ... O[ ] |
| 1TUBB | <a href="#">CYS241(O)</a>  | 4.80 | <a href="#">THR240(N)</a>   | 1TUBB | [D-A-AA]:86.7° [A-D-DD]:78.8° d_planarity:53.4°<br>a_planarity:-43.3°, maximum distance exceeded,<br>bad a_angle(sp2), bad d_angle(sp2) |               |
| 1TUBB | <a href="#">CYS241(O)</a>  | 4.74 | <a href="#">THR240(CA)</a>  | 1TUBB |                                                                                                                                         |               |
| 1TUBB | <a href="#">CYS241(O)</a>  | 3.47 | <a href="#">THR240(C)</a>   | 1TUBB |                                                                                                                                         | O[ ] ... C[ ] |
| 1TUBB | <a href="#">CYS241(O)</a>  | 3.61 | <a href="#">THR240(O)</a>   | 1TUBB |                                                                                                                                         | O[ ] ... O[ ] |
| 1TUBB | <a href="#">CYS241(CB)</a> | 4.79 | <a href="#">THR240(CA)</a>  | 1TUBB |                                                                                                                                         |               |
| 1TUBB | <a href="#">CYS241(CB)</a> | 3.62 | <a href="#">THR240(C)</a>   | 1TUBB |                                                                                                                                         | C[ ] ... C[ ] |
| 1TUBB | <a href="#">CYS241(CB)</a> | 4.08 | <a href="#">THR240(O)</a>   | 1TUBB |                                                                                                                                         | C[ ] ... O[ ] |
| 1TUBB | <a href="#">CYS241(SG)</a> | 4.93 | <a href="#">THR240(CA)</a>  | 1TUBB |                                                                                                                                         |               |
| 1TUBB | <a href="#">CYS241(SG)</a> | 4.14 | <a href="#">THR240(C)</a>   | 1TUBB |                                                                                                                                         | S[ ] ... C[ ] |
| 1TUBB | <a href="#">CYS241(SG)</a> | 4.78 | <a href="#">THR240(O)</a>   | 1TUBB |                                                                                                                                         |               |
| 1TUBB | <a href="#">CYS241(SG)</a> | 4.71 | <a href="#">THR240(CB)</a>  | 1TUBB |                                                                                                                                         |               |
| 1TUBB | <a href="#">CYS241(SG)</a> | 4.96 | <a href="#">THR240(CG2)</a> | 1TUBB |                                                                                                                                         |               |
| 1TUBB | <a href="#">CYS241(N)</a>  | 3.43 | <a href="#">LEU242(N)</a>   | 1TUBB |                                                                                                                                         | N[ ] ... N[ ] |
| 1TUBB | <a href="#">CYS241(N)</a>  | 4.61 | <a href="#">LEU242(CA)</a>  | 1TUBB |                                                                                                                                         |               |
| 1TUBB | <a href="#">CYS241(N)</a>  | 4.98 | <a href="#">LEU242(C)</a>   | 1TUBB |                                                                                                                                         |               |
| 1TUBB | <a href="#">CYS241(N)</a>  | 4.92 | <a href="#">LEU242(CB)</a>  | 1TUBB |                                                                                                                                         |               |
| 1TUBB | <a href="#">CYS241(CA)</a> | 2.37 | <a href="#">LEU242(N)</a>   | 1TUBB |                                                                                                                                         | C[ ] ... N[ ] |
| 1TUBB | <a href="#">CYS241(CA)</a> | 3.70 | <a href="#">LEU242(CA)</a>  | 1TUBB |                                                                                                                                         | C[ ] ... C[ ] |
| 1TUBB | <a href="#">CYS241(CA)</a> | 4.41 | <a href="#">LEU242(C)</a>   | 1TUBB |                                                                                                                                         | C[ ] ... C[ ] |
| 1TUBB | <a href="#">CYS241(CA)</a> | 4.10 | <a href="#">LEU242(CB)</a>  | 1TUBB |                                                                                                                                         | C[ ] ... C[ ] |
| 1TUBB | <a href="#">CYS241(CA)</a> | 4.19 | <a href="#">LEU242(CG)</a>  | 1TUBB |                                                                                                                                         | C[ ] ... C[ ] |
| 1TUBB | <a href="#">CYS241(C)</a>  | 2.34 | <a href="#">LEU242(CA)</a>  | 1TUBB |                                                                                                                                         | C[ ] ... C[ ] |
| 1TUBB | <a href="#">CYS241(C)</a>  | 3.16 | <a href="#">LEU242(C)</a>   | 1TUBB |                                                                                                                                         | C[ ] ... C[ ] |
| 1TUBB | <a href="#">CYS241(C)</a>  | 4.25 | <a href="#">LEU242(O)</a>   | 1TUBB |                                                                                                                                         | C[ ] ... O[ ] |
| 1TUBB | <a href="#">CYS241(C)</a>  | 2.62 | <a href="#">LEU242(CB)</a>  | 1TUBB |                                                                                                                                         | C[ ] ... C[ ] |
| 1TUBB | <a href="#">CYS241(C)</a>  | 2.96 | <a href="#">LEU242(CG)</a>  | 1TUBB |                                                                                                                                         | C[ ] ... C[ ] |
| 1TUBB | <a href="#">CYS241(C)</a>  | 4.09 | <a href="#">LEU242(CD1)</a> | 1TUBB |                                                                                                                                         | C[ ] ... C[ ] |
| 1TUBB | <a href="#">CYS241(C)</a>  | 4.00 | <a href="#">LEU242(CD2)</a> | 1TUBB |                                                                                                                                         | C[ ] ... C[ ] |
| 1TUBB | <a href="#">CYS241(O)</a>  | 2.21 | <a href="#">LEU242(N)</a>   | 1TUBB | [D-A-AA]:29.1° [A-D-DD]:91.1° d_planarity:0.6°<br>a_planarity:3.0°, bad a_angle(sp2)                                                    | O[ ] ... N[ ] |
| 1TUBB | <a href="#">CYS241(O)</a>  | 2.66 | <a href="#">LEU242(CA)</a>  | 1TUBB |                                                                                                                                         | O[ ] ... C[ ] |
| 1TUBB | <a href="#">CYS241(O)</a>  | 3.37 | <a href="#">LEU242(C)</a>   | 1TUBB |                                                                                                                                         | O[ ] ... C[ ] |
| 1TUBB | <a href="#">CYS241(O)</a>  | 4.25 | <a href="#">LEU242(O)</a>   | 1TUBB |                                                                                                                                         | O[ ] ... O[ ] |
| 1TUBB | <a href="#">CYS241(O)</a>  | 2.27 | <a href="#">LEU242(CB)</a>  | 1TUBB |                                                                                                                                         | O[ ] ... C[ ] |
| 1TUBB | <a href="#">CYS241(O)</a>  | 2.64 | <a href="#">LEU242(CG)</a>  | 1TUBB |                                                                                                                                         | O[ ] ... C[ ] |
| 1TUBB | <a href="#">CYS241(O)</a>  | 3.41 | <a href="#">LEU242(CD1)</a> | 1TUBB |                                                                                                                                         | O[ ] ... C[ ] |

|       |                            |      |                             |       |                                                                                                  |               |
|-------|----------------------------|------|-----------------------------|-------|--------------------------------------------------------------------------------------------------|---------------|
| 1TUBB | <a href="#">CYS241(O)</a>  | 4.00 | <a href="#">LEU242(CD2)</a> | 1TUBB |                                                                                                  | O[ ] ... C[ ] |
| 1TUBB | <a href="#">CYS241(CB)</a> | 3.33 | <a href="#">LEU242(N)</a>   | 1TUBB |                                                                                                  | C[ ] ... N[ ] |
| 1TUBB | <a href="#">CYS241(CB)</a> | 4.53 | <a href="#">LEU242(CA)</a>  | 1TUBB |                                                                                                  |               |
| 1TUBB | <a href="#">CYS241(CB)</a> | 4.60 | <a href="#">LEU242(CB)</a>  | 1TUBB |                                                                                                  |               |
| 1TUBB | <a href="#">CYS241(CB)</a> | 4.20 | <a href="#">LEU242(CG)</a>  | 1TUBB |                                                                                                  | C[ ] ... C[ ] |
| 1TUBB | <a href="#">CYS241(CB)</a> | 4.97 | <a href="#">LEU242(CD1)</a> | 1TUBB |                                                                                                  |               |
| 1TUBB | <a href="#">CYS241(SG)</a> | 4.85 | <a href="#">LEU242(N)</a>   | 1TUBB | [D-A-AA]:24.8° [A-D-DD]:153.8° d_planarity:38.7°,<br>maximum distance exceeded, bad a_angle(sp3) |               |
| 1TUBB | <a href="#">CYS241(N)</a>  | 4.20 | <a href="#">ARG243(N)</a>   | 1TUBB |                                                                                                  | N[ ] ... N[ ] |
| 1TUBB | <a href="#">CYS241(N)</a>  | 4.96 | <a href="#">ARG243(CA)</a>  | 1TUBB |                                                                                                  |               |
| 1TUBB | <a href="#">CYS241(N)</a>  | 4.61 | <a href="#">ARG243(CB)</a>  | 1TUBB |                                                                                                  |               |
| 1TUBB | <a href="#">CYS241(N)</a>  | 4.76 | <a href="#">ARG243(CG)</a>  | 1TUBB |                                                                                                  |               |
| 1TUBB | <a href="#">CYS241(CA)</a> | 3.94 | <a href="#">ARG243(N)</a>   | 1TUBB |                                                                                                  | C[ ] ... N[ ] |
| 1TUBB | <a href="#">CYS241(C)</a>  | 2.93 | <a href="#">ARG243(N)</a>   | 1TUBB |                                                                                                  | C[ ] ... N[ ] |
| 1TUBB | <a href="#">CYS241(C)</a>  | 4.23 | <a href="#">ARG243(CA)</a>  | 1TUBB |                                                                                                  | C[ ] ... C[ ] |
| 1TUBB | <a href="#">CYS241(C)</a>  | 4.89 | <a href="#">ARG243(C)</a>   | 1TUBB |                                                                                                  |               |
| 1TUBB | <a href="#">CYS241(C)</a>  | 4.55 | <a href="#">ARG243(CB)</a>  | 1TUBB |                                                                                                  |               |
| 1TUBB | <a href="#">CYS241(C)</a>  | 4.60 | <a href="#">ARG243(CG)</a>  | 1TUBB |                                                                                                  |               |
| 1TUBB | <a href="#">CYS241(O)</a>  | 3.18 | <a href="#">ARG243(N)</a>   | 1TUBB | [D-A-AA]:67.1° [A-D-DD]:145.3° d_planarity:-30.7°<br>a_planarity:51.0°, bad a_angle(sp2)         | O[ ] ... N[ ] |
| 1TUBB | <a href="#">CYS241(O)</a>  | 4.45 | <a href="#">ARG243(CA)</a>  | 1TUBB |                                                                                                  | O[ ] ... C[ ] |
| 1TUBB | <a href="#">CYS241(O)</a>  | 4.59 | <a href="#">ARG243(CB)</a>  | 1TUBB |                                                                                                  |               |
| 1TUBB | <a href="#">CYS241(O)</a>  | 4.24 | <a href="#">ARG243(CG)</a>  | 1TUBB |                                                                                                  | O[ ] ... C[ ] |
| 1TUBB | <a href="#">CYS241(N)</a>  | 4.64 | <a href="#">PHE244(N)</a>   | 1TUBB |                                                                                                  |               |
| 1TUBB | <a href="#">CYS241(CA)</a> | 4.57 | <a href="#">PHE244(N)</a>   | 1TUBB |                                                                                                  |               |
| 1TUBB | <a href="#">CYS241(C)</a>  | 4.31 | <a href="#">PHE244(N)</a>   | 1TUBB |                                                                                                  | C[ ] ... N[ ] |
| 1TUBB | <a href="#">CYS241(C)</a>  | 4.64 | <a href="#">PHE244(O)</a>   | 1TUBB |                                                                                                  |               |
| 1TUBB | <a href="#">CYS241(O)</a>  | 4.36 | <a href="#">ALA250(O)</a>   | 1TUBB |                                                                                                  | O[ ] ... O[ ] |
| 1TUBB | <a href="#">CYS241(CB)</a> | 4.13 | <a href="#">VAL318(CG1)</a> | 1TUBB |                                                                                                  | C[ ] ... C[ ] |
| 1TUBB | <a href="#">CYS241(SG)</a> | 4.84 | <a href="#">VAL318(CG1)</a> | 1TUBB |                                                                                                  |               |
| 1TUBB | <a href="#">CYS241(N)</a>  | 4.98 | <a href="#">ARG320(CZ)</a>  | 1TUBB |                                                                                                  |               |
| 1TUBB | <a href="#">CYS241(N)</a>  | 3.75 | <a href="#">ARG320(NH1)</a> | 1TUBB |                                                                                                  | N[ ] ... N[+] |
| 1TUBB | <a href="#">CYS241(CA)</a> | 4.76 | <a href="#">ARG320(CD)</a>  | 1TUBB |                                                                                                  |               |
| 1TUBB | <a href="#">CYS241(CA)</a> | 3.96 | <a href="#">ARG320(NH1)</a> | 1TUBB |                                                                                                  | C[ ] ... N[+] |
| 1TUBB | <a href="#">CYS241(CB)</a> | 4.08 | <a href="#">ARG320(CD)</a>  | 1TUBB |                                                                                                  | C[ ] ... C[ ] |
| 1TUBB | <a href="#">CYS241(CB)</a> | 4.72 | <a href="#">ARG320(NE)</a>  | 1TUBB |                                                                                                  |               |
| 1TUBB | <a href="#">CYS241(CB)</a> | 4.59 | <a href="#">ARG320(CZ)</a>  | 1TUBB |                                                                                                  |               |
| 1TUBB | <a href="#">CYS241(CB)</a> | 3.71 | <a href="#">ARG320(NH1)</a> | 1TUBB |                                                                                                  | C[ ] ... N[+] |
| 1TUBB | <a href="#">CYS241(SG)</a> | 4.58 | <a href="#">ARG320(CB)</a>  | 1TUBB |                                                                                                  |               |
| 1TUBB | <a href="#">CYS241(SG)</a> | 4.08 | <a href="#">ARG320(CG)</a>  | 1TUBB |                                                                                                  | S[ ] ... C[ ] |
| 1TUBB | <a href="#">CYS241(SG)</a> | 2.84 | <a href="#">ARG320(CD)</a>  | 1TUBB | Positive                                                                                         | S[ ] ... C[ ] |
| 1TUBB | <a href="#">CYS241(SG)</a> | 3.10 | <a href="#">ARG320(NE)</a>  | 1TUBB | [D-A-AA]:150.2° [A-D-DD]:68.3° d_planarity:34.9°,<br>bad d_angle(sp2)                            | S[ ] ... N[ ] |
| 1TUBB | <a href="#">CYS241(SG)</a> | 2.89 | <a href="#">ARG320(CZ)</a>  | 1TUBB |                                                                                                  | S[ ] ... C[ ] |
| 1TUBB | <a href="#">CYS241(SG)</a> | 2.20 | <a href="#">ARG320(NH1)</a> | 1TUBB | <b>H-bond</b> [D-A-AA]:138.1° [A-D-DD]:109.3° d_planarity:-<br>52.5°                             | S[ ] ... N[+] |
| 1TUBB | <a href="#">CYS241(SG)</a> | 3.94 | <a href="#">ARG320(NH2)</a> | 1TUBB | [D-A-AA]:164.6° [A-D-DD]:30.3° d_planarity:56.2°,<br>bad d_angle(sp2)                            | S[ ] ... N[+] |
| 1TUBB | <a href="#">CYS241(N)</a>  | 4.97 | <a href="#">CYS356(SG)</a>  | 1TUBB | [D-A-AA]:103.7° [A-D-DD]:13.5° d_planarity:15.3°,<br>maximum distance exceeded, bad d_angle(sp2) |               |
| 1TUBB | <a href="#">CYS241(CA)</a> | 4.32 | <a href="#">CYS356(CB)</a>  | 1TUBB |                                                                                                  | C[ ] ... C[ ] |

|       |                             |      |                              |       |                                                                   |               |
|-------|-----------------------------|------|------------------------------|-------|-------------------------------------------------------------------|---------------|
| 1TUBB | <a href="#">CYS241</a> (CA) | 3.58 | <a href="#">CYS356</a> (SG)  | 1TUBB |                                                                   | C[ ] ... S[ ] |
| 1TUBB | <a href="#">CYS241</a> (C)  | 4.37 | <a href="#">CYS356</a> (CB)  | 1TUBB |                                                                   | C[ ] ... C[ ] |
| 1TUBB | <a href="#">CYS241</a> (C)  | 3.10 | <a href="#">CYS356</a> (SG)  | 1TUBB |                                                                   | C[ ] ... S[ ] |
| 1TUBB | <a href="#">CYS241</a> (O)  | 4.00 | <a href="#">CYS356</a> (SG)  | 1TUBB |                                                                   | O[ ] ... S[ ] |
| 1TUBB | <a href="#">CYS241</a> (CB) | 4.49 | <a href="#">CYS356</a> (CB)  | 1TUBB |                                                                   | C[ ] ... C[ ] |
| 1TUBB | <a href="#">CYS241</a> (CB) | 3.86 | <a href="#">CYS356</a> (SG)  | 1TUBB | Possible disulphide                                               | C[ ] ... S[ ] |
| 1TUBB | <a href="#">CYS241</a> (SG) | 4.86 | <a href="#">THR376</a> (OG1) | 1TUBB | [D-A-AA]:109.1° [A-D-DD]:121.8°, <b>maximum distance exceeded</b> |               |

| chain1 | res1/atm1                   | distance | res2/atm2                    | chain2 | H-bonding                                                                                                            | Charge interaction |
|--------|-----------------------------|----------|------------------------------|--------|----------------------------------------------------------------------------------------------------------------------|--------------------|
| 3DU7A  | <a href="#">CYS347</a> (CB) | 4.82     | <a href="#">TYR312</a> (O)   | 3DU7A  |                                                                                                                      |                    |
| 3DU7A  | <a href="#">CYS347</a> (SG) | 5.00     | <a href="#">TYR312</a> (O)   | 3DU7A  |                                                                                                                      |                    |
| 3DU7A  | <a href="#">CYS347</a> (CB) | 4.16     | <a href="#">MET313</a> (CA)  | 3DU7A  |                                                                                                                      | C[ ] ... C[ ]      |
| 3DU7A  | <a href="#">CYS347</a> (CB) | 4.20     | <a href="#">MET313</a> (C)   | 3DU7A  |                                                                                                                      | C[ ] ... C[ ]      |
| 3DU7A  | <a href="#">CYS347</a> (CB) | 4.01     | <a href="#">MET313</a> (O)   | 3DU7A  |                                                                                                                      | C[ ] ... O[ ]      |
| 3DU7A  | <a href="#">CYS347</a> (CB) | 4.66     | <a href="#">MET313</a> (CB)  | 3DU7A  |                                                                                                                      |                    |
| 3DU7A  | <a href="#">CYS347</a> (SG) | 4.88     | <a href="#">MET313</a> (N)   | 3DU7A  | [D-A-AA]:93.0° [A-D-DD]:35.0° d_planarity:68.0°, <b>maximum distance exceeded, bad d_angle(sp2), bad d_planarity</b> |                    |
| 3DU7A  | <a href="#">CYS347</a> (SG) | 3.77     | <a href="#">MET313</a> (CA)  | 3DU7A  |                                                                                                                      | S[ ] ... C[ ]      |
| 3DU7A  | <a href="#">CYS347</a> (SG) | 3.21     | <a href="#">MET313</a> (C)   | 3DU7A  |                                                                                                                      | S[ ] ... C[ ]      |
| 3DU7A  | <a href="#">CYS347</a> (SG) | 3.04     | <a href="#">MET313</a> (O)   | 3DU7A  |                                                                                                                      | S[ ] ... O[ ]      |
| 3DU7A  | <a href="#">CYS347</a> (SG) | 4.64     | <a href="#">MET313</a> (CB)  | 3DU7A  |                                                                                                                      |                    |
| 3DU7A  | <a href="#">CYS347</a> (SG) | 3.70     | <a href="#">ALA314</a> (N)   | 3DU7A  | [D-A-AA]:126.4° [A-D-DD]:86.0° d_planarity:46.8°, <b>bad d_angle(sp2)</b>                                            | S[ ] ... N[ ]      |
| 3DU7A  | <a href="#">CYS347</a> (SG) | 3.89     | <a href="#">ALA314</a> (CA)  | 3DU7A  |                                                                                                                      | S[ ] ... C[ ]      |
| 3DU7A  | <a href="#">CYS347</a> (SG) | 4.32     | <a href="#">ALA314</a> (CB)  | 3DU7A  |                                                                                                                      | S[ ] ... C[ ]      |
| 3DU7A  | <a href="#">CYS347</a> (C)  | 4.90     | <a href="#">PHE343</a> (CD2) | 3DU7A  |                                                                                                                      |                    |
| 3DU7A  | <a href="#">CYS347</a> (O)  | 4.25     | <a href="#">PHE343</a> (CB)  | 3DU7A  |                                                                                                                      | O[ ] ... C[ ]      |
| 3DU7A  | <a href="#">CYS347</a> (O)  | 3.92     | <a href="#">PHE343</a> (CG)  | 3DU7A  |                                                                                                                      | O[ ] ... C[ ]      |
| 3DU7A  | <a href="#">CYS347</a> (O)  | 4.47     | <a href="#">PHE343</a> (CD1) | 3DU7A  |                                                                                                                      | O[ ] ... C[ ]      |
| 3DU7A  | <a href="#">CYS347</a> (O)  | 3.79     | <a href="#">PHE343</a> (CD2) | 3DU7A  |                                                                                                                      | O[ ] ... C[ ]      |
| 3DU7A  | <a href="#">CYS347</a> (O)  | 4.86     | <a href="#">PHE343</a> (CE1) | 3DU7A  |                                                                                                                      |                    |
| 3DU7A  | <a href="#">CYS347</a> (O)  | 4.24     | <a href="#">PHE343</a> (CE2) | 3DU7A  |                                                                                                                      | O[ ] ... C[ ]      |
| 3DU7A  | <a href="#">CYS347</a> (O)  | 4.75     | <a href="#">PHE343</a> (CZ)  | 3DU7A  |                                                                                                                      |                    |
| 3DU7A  | <a href="#">CYS347</a> (CB) | 4.72     | <a href="#">PHE343</a> (CD2) | 3DU7A  |                                                                                                                      |                    |
| 3DU7A  | <a href="#">CYS347</a> (CB) | 4.90     | <a href="#">PHE343</a> (CE2) | 3DU7A  |                                                                                                                      |                    |
| 3DU7A  | <a href="#">CYS347</a> (SG) | 4.47     | <a href="#">PHE343</a> (CD2) | 3DU7A  |                                                                                                                      | S[ ] ... C[ ]      |
| 3DU7A  | <a href="#">CYS347</a> (SG) | 4.12     | <a href="#">PHE343</a> (CE2) | 3DU7A  |                                                                                                                      | S[ ] ... C[ ]      |
| 3DU7A  | <a href="#">CYS347</a> (SG) | 4.88     | <a href="#">PHE343</a> (CZ)  | 3DU7A  |                                                                                                                      |                    |
| 3DU7A  | <a href="#">CYS347</a> (N)  | 4.29     | <a href="#">VAL344</a> (C)   | 3DU7A  |                                                                                                                      | N[ ] ... C[ ]      |
| 3DU7A  | <a href="#">CYS347</a> (N)  | 3.27     | <a href="#">VAL344</a> (O)   | 3DU7A  | <b>H-bond</b> [D-A-AA]:141.1° [A-D-DD]:134.5° d_planarity:-21.8° a_planarity:84.1°                                   | N[ ] ... O[ ]      |
| 3DU7A  | <a href="#">CYS347</a> (N)  | 4.78     | <a href="#">VAL344</a> (CG1) | 3DU7A  |                                                                                                                      |                    |
| 3DU7A  | <a href="#">CYS347</a> (CA) | 4.42     | <a href="#">VAL344</a> (O)   | 3DU7A  |                                                                                                                      | C[ ] ... O[ ]      |
| 3DU7A  | <a href="#">CYS347</a> (CB) | 4.43     | <a href="#">VAL344</a> (O)   | 3DU7A  |                                                                                                                      | C[ ] ... O[ ]      |
| 3DU7A  | <a href="#">CYS347</a> (CB) | 4.49     | <a href="#">VAL344</a> (CG1) | 3DU7A  |                                                                                                                      | C[ ] ... C[ ]      |
| 3DU7A  | <a href="#">CYS347</a> (N)  | 3.98     | <a href="#">ASP345</a> (C)   | 3DU7A  |                                                                                                                      | N[ ] ... C[ ]      |

|       |                            |      |                             |       |                                                                                                                                         |               |
|-------|----------------------------|------|-----------------------------|-------|-----------------------------------------------------------------------------------------------------------------------------------------|---------------|
| 3DU7A | <a href="#">CYS347(N)</a>  | 4.48 | <a href="#">ASP345(O)</a>   | 3DU7A | [D-A-AA]:59.0° [A-D-DD]:153.7° d_planarity:88.8°<br>a_planarity:27.6°, maximum distance exceeded,<br>bad a_angle(sp2), bad d_planarity  | N[ ] ... O[ ] |
| 3DU7A | <a href="#">CYS347(N)</a>  | 2.89 | <a href="#">TRP346(N)</a>   | 3DU7A |                                                                                                                                         | N[ ] ... N[ ] |
| 3DU7A | <a href="#">CYS347(N)</a>  | 2.48 | <a href="#">TRP346(CA)</a>  | 3DU7A |                                                                                                                                         | N[ ] ... C[ ] |
| 3DU7A | <a href="#">CYS347(N)</a>  | 2.24 | <a href="#">TRP346(O)</a>   | 3DU7A | [D-A-AA]:30.4° [A-D-DD]:92.8° d_planarity:1.3°<br>a_planarity:1.3°, bad a_angle(sp2)                                                    | N[ ] ... O[ ] |
| 3DU7A | <a href="#">CYS347(N)</a>  | 3.54 | <a href="#">TRP346(CB)</a>  | 3DU7A |                                                                                                                                         | N[ ] ... C[ ] |
| 3DU7A | <a href="#">CYS347(N)</a>  | 3.83 | <a href="#">TRP346(CG)</a>  | 3DU7A |                                                                                                                                         | N[ ] ... C[ ] |
| 3DU7A | <a href="#">CYS347(N)</a>  | 4.94 | <a href="#">TRP346(CD1)</a> | 3DU7A |                                                                                                                                         |               |
| 3DU7A | <a href="#">CYS347(N)</a>  | 3.62 | <a href="#">TRP346(CD2)</a> | 3DU7A |                                                                                                                                         | N[ ] ... C[ ] |
| 3DU7A | <a href="#">CYS347(N)</a>  | 4.75 | <a href="#">TRP346(CE2)</a> | 3DU7A |                                                                                                                                         |               |
| 3DU7A | <a href="#">CYS347(N)</a>  | 3.16 | <a href="#">TRP346(CE3)</a> | 3DU7A |                                                                                                                                         | N[ ] ... C[ ] |
| 3DU7A | <a href="#">CYS347(N)</a>  | 4.04 | <a href="#">TRP346(CZ3)</a> | 3DU7A |                                                                                                                                         | N[ ] ... C[ ] |
| 3DU7A | <a href="#">CYS347(CA)</a> | 4.36 | <a href="#">TRP346(N)</a>   | 3DU7A |                                                                                                                                         | C[ ] ... N[ ] |
| 3DU7A | <a href="#">CYS347(CA)</a> | 3.85 | <a href="#">TRP346(CA)</a>  | 3DU7A |                                                                                                                                         | C[ ] ... C[ ] |
| 3DU7A | <a href="#">CYS347(CA)</a> | 2.44 | <a href="#">TRP346(C)</a>   | 3DU7A |                                                                                                                                         | C[ ] ... C[ ] |
| 3DU7A | <a href="#">CYS347(CA)</a> | 2.74 | <a href="#">TRP346(O)</a>   | 3DU7A |                                                                                                                                         | C[ ] ... O[ ] |
| 3DU7A | <a href="#">CYS347(CA)</a> | 4.78 | <a href="#">TRP346(CB)</a>  | 3DU7A |                                                                                                                                         |               |
| 3DU7A | <a href="#">CYS347(CA)</a> | 4.49 | <a href="#">TRP346(CD2)</a> | 3DU7A |                                                                                                                                         | C[ ] ... C[ ] |
| 3DU7A | <a href="#">CYS347(CA)</a> | 3.60 | <a href="#">TRP346(CE3)</a> | 3DU7A |                                                                                                                                         | C[ ] ... C[ ] |
| 3DU7A | <a href="#">CYS347(CA)</a> | 4.10 | <a href="#">TRP346(CZ3)</a> | 3DU7A |                                                                                                                                         | C[ ] ... C[ ] |
| 3DU7A | <a href="#">CYS347(C)</a>  | 4.65 | <a href="#">TRP346(CA)</a>  | 3DU7A |                                                                                                                                         |               |
| 3DU7A | <a href="#">CYS347(C)</a>  | 3.34 | <a href="#">TRP346(C)</a>   | 3DU7A |                                                                                                                                         | C[ ] ... C[ ] |
| 3DU7A | <a href="#">CYS347(C)</a>  | 3.58 | <a href="#">TRP346(O)</a>   | 3DU7A |                                                                                                                                         | C[ ] ... O[ ] |
| 3DU7A | <a href="#">CYS347(O)</a>  | 4.18 | <a href="#">TRP346(C)</a>   | 3DU7A |                                                                                                                                         | O[ ] ... C[ ] |
| 3DU7A | <a href="#">CYS347(O)</a>  | 4.65 | <a href="#">TRP346(O)</a>   | 3DU7A |                                                                                                                                         |               |
| 3DU7A | <a href="#">CYS347(CB)</a> | 4.83 | <a href="#">TRP346(CA)</a>  | 3DU7A |                                                                                                                                         |               |
| 3DU7A | <a href="#">CYS347(CB)</a> | 3.60 | <a href="#">TRP346(C)</a>   | 3DU7A |                                                                                                                                         | C[ ] ... C[ ] |
| 3DU7A | <a href="#">CYS347(CB)</a> | 4.01 | <a href="#">TRP346(O)</a>   | 3DU7A |                                                                                                                                         | C[ ] ... O[ ] |
| 3DU7A | <a href="#">CYS347(CB)</a> | 4.56 | <a href="#">TRP346(CD2)</a> | 3DU7A |                                                                                                                                         |               |
| 3DU7A | <a href="#">CYS347(CB)</a> | 3.57 | <a href="#">TRP346(CE3)</a> | 3DU7A |                                                                                                                                         | C[ ] ... C[ ] |
| 3DU7A | <a href="#">CYS347(CB)</a> | 3.55 | <a href="#">TRP346(CZ3)</a> | 3DU7A |                                                                                                                                         | C[ ] ... C[ ] |
| 3DU7A | <a href="#">CYS347(CB)</a> | 4.53 | <a href="#">TRP346(CH2)</a> | 3DU7A |                                                                                                                                         |               |
| 3DU7A | <a href="#">CYS347(SG)</a> | 4.75 | <a href="#">TRP346(CZ3)</a> | 3DU7A |                                                                                                                                         |               |
| 3DU7A | <a href="#">CYS347(N)</a>  | 3.32 | <a href="#">PRO348(N)</a>   | 3DU7A |                                                                                                                                         | N[ ] ... N[ ] |
| 3DU7A | <a href="#">CYS347(N)</a>  | 4.45 | <a href="#">PRO348(CA)</a>  | 3DU7A |                                                                                                                                         | N[ ] ... C[ ] |
| 3DU7A | <a href="#">CYS347(N)</a>  | 4.92 | <a href="#">PRO348(C)</a>   | 3DU7A |                                                                                                                                         |               |
| 3DU7A | <a href="#">CYS347(N)</a>  | 4.72 | <a href="#">PRO348(O)</a>   | 3DU7A | [D-A-AA]:91.8° [A-D-DD]:73.9° d_planarity:-74.8°<br>a_planarity:-43.1°, maximum distance exceeded,<br>bad d_angle(sp2), bad d_planarity |               |
| 3DU7A | <a href="#">CYS347(N)</a>  | 3.95 | <a href="#">PRO348(CD)</a>  | 3DU7A |                                                                                                                                         | N[ ] ... C[ ] |
| 3DU7A | <a href="#">CYS347(CA)</a> | 2.47 | <a href="#">PRO348(N)</a>   | 3DU7A |                                                                                                                                         | C[ ] ... N[ ] |
| 3DU7A | <a href="#">CYS347(CA)</a> | 3.82 | <a href="#">PRO348(CA)</a>  | 3DU7A |                                                                                                                                         | C[ ] ... C[ ] |
| 3DU7A | <a href="#">CYS347(CA)</a> | 4.39 | <a href="#">PRO348(C)</a>   | 3DU7A |                                                                                                                                         | C[ ] ... C[ ] |
| 3DU7A | <a href="#">CYS347(CA)</a> | 4.54 | <a href="#">PRO348(O)</a>   | 3DU7A |                                                                                                                                         |               |
| 3DU7A | <a href="#">CYS347(CA)</a> | 4.76 | <a href="#">PRO348(CB)</a>  | 3DU7A |                                                                                                                                         |               |
| 3DU7A | <a href="#">CYS347(CA)</a> | 4.39 | <a href="#">PRO348(CG)</a>  | 3DU7A |                                                                                                                                         | C[ ] ... C[ ] |
| 3DU7A | <a href="#">CYS347(CA)</a> | 3.01 | <a href="#">PRO348(CD)</a>  | 3DU7A |                                                                                                                                         | C[ ] ... C[ ] |
| 3DU7A | <a href="#">CYS347(C)</a>  | 2.46 | <a href="#">PRO348(CA)</a>  | 3DU7A |                                                                                                                                         | C[ ] ... C[ ] |



|       |                            |      |                             |       |                                                                                                                        |               |
|-------|----------------------------|------|-----------------------------|-------|------------------------------------------------------------------------------------------------------------------------|---------------|
| 3DU7A | <a href="#">CYS347(C)</a>  | 2.88 | <a href="#">PRO348(C)</a>   | 3DU7A |                                                                                                                        | C[ ] ... C[ ] |
| 3DU7A | <a href="#">CYS347(C)</a>  | 3.17 | <a href="#">PRO348(O)</a>   | 3DU7A |                                                                                                                        | C[ ] ... O[ ] |
| 3DU7A | <a href="#">CYS347(C)</a>  | 3.50 | <a href="#">PRO348(CB)</a>  | 3DU7A |                                                                                                                        | C[ ] ... C[ ] |
| 3DU7A | <a href="#">CYS347(C)</a>  | 3.55 | <a href="#">PRO348(CG)</a>  | 3DU7A |                                                                                                                        | C[ ] ... C[ ] |
| 3DU7A | <a href="#">CYS347(C)</a>  | 2.52 | <a href="#">PRO348(CD)</a>  | 3DU7A |                                                                                                                        | C[ ] ... C[ ] |
| 3DU7A | <a href="#">CYS347(O)</a>  | 2.25 | <a href="#">PRO348(N)</a>   | 3DU7A |                                                                                                                        | O[ ] ... N[ ] |
| 3DU7A | <a href="#">CYS347(O)</a>  | 2.83 | <a href="#">PRO348(CA)</a>  | 3DU7A |                                                                                                                        | O[ ] ... C[ ] |
| 3DU7A | <a href="#">CYS347(O)</a>  | 2.55 | <a href="#">PRO348(C)</a>   | 3DU7A |                                                                                                                        | O[ ] ... C[ ] |
| 3DU7A | <a href="#">CYS347(O)</a>  | 2.64 | <a href="#">PRO348(O)</a>   | 3DU7A |                                                                                                                        | O[ ] ... O[ ] |
| 3DU7A | <a href="#">CYS347(O)</a>  | 3.92 | <a href="#">PRO348(CB)</a>  | 3DU7A |                                                                                                                        | O[ ] ... C[ ] |
| 3DU7A | <a href="#">CYS347(O)</a>  | 4.35 | <a href="#">PRO348(CG)</a>  | 3DU7A |                                                                                                                        | O[ ] ... C[ ] |
| 3DU7A | <a href="#">CYS347(O)</a>  | 3.59 | <a href="#">PRO348(CD)</a>  | 3DU7A |                                                                                                                        | O[ ] ... C[ ] |
| 3DU7A | <a href="#">CYS347(CB)</a> | 3.67 | <a href="#">PRO348(N)</a>   | 3DU7A |                                                                                                                        | C[ ] ... N[ ] |
| 3DU7A | <a href="#">CYS347(CB)</a> | 4.99 | <a href="#">PRO348(CA)</a>  | 3DU7A |                                                                                                                        |               |
| 3DU7A | <a href="#">CYS347(CB)</a> | 4.18 | <a href="#">PRO348(CD)</a>  | 3DU7A |                                                                                                                        | C[ ] ... C[ ] |
| 3DU7A | <a href="#">CYS347(SG)</a> | 4.14 | <a href="#">PRO348(N)</a>   | 3DU7A |                                                                                                                        | S[ ] ... N[ ] |
| 3DU7A | <a href="#">CYS347(SG)</a> | 4.53 | <a href="#">PRO348(CD)</a>  | 3DU7A |                                                                                                                        |               |
| 3DU7A | <a href="#">CYS347(C)</a>  | 3.72 | <a href="#">THR349(N)</a>   | 3DU7A |                                                                                                                        | C[ ] ... N[ ] |
| 3DU7A | <a href="#">CYS347(C)</a>  | 4.64 | <a href="#">THR349(CA)</a>  | 3DU7A |                                                                                                                        |               |
| 3DU7A | <a href="#">CYS347(O)</a>  | 3.23 | <a href="#">THR349(N)</a>   | 3DU7A | <b>H-bond</b> [D-A-AA]:103.9° [A-D-DD]:102.7°<br>d_planarity:47.6° a_planarity:5.8°                                    | O[ ] ... N[ ] |
| 3DU7A | <a href="#">CYS347(O)</a>  | 3.82 | <a href="#">THR349(CA)</a>  | 3DU7A |                                                                                                                        | O[ ] ... C[ ] |
| 3DU7A | <a href="#">CYS347(O)</a>  | 4.63 | <a href="#">THR349(C)</a>   | 3DU7A |                                                                                                                        |               |
| 3DU7A | <a href="#">CYS347(O)</a>  | 4.91 | <a href="#">THR349(OG1)</a> | 3DU7A | [D-A-AA]:124.6° [A-D-DD]:86.8° a_planarity:27.7°,<br>maximum distance exceeded                                         |               |
| 3DU7A | <a href="#">CYS347(O)</a>  | 4.33 | <a href="#">GLY350(N)</a>   | 3DU7A | [D-A-AA]:117.5° [A-D-DD]:129.7° d_planarity:-46.0°<br>a_planarity:47.9°, maximum distance exceeded                     | O[ ] ... N[ ] |
| 3DU7A | <a href="#">CYS347(N)</a>  | 4.17 | <a href="#">PRO27(O)</a>    | 3DU7E | [D-A-AA]:131.8° [A-D-DD]:117.8° d_planarity:63.2°<br>a_planarity:-28.4°, maximum distance exceeded,<br>bad d_planarity | N[ ] ... O[ ] |
| 3DU7A | <a href="#">CYS347(C)</a>  | 4.71 | <a href="#">PRO27(CA)</a>   | 3DU7E |                                                                                                                        |               |
| 3DU7A | <a href="#">CYS347(C)</a>  | 4.77 | <a href="#">PRO27(O)</a>    | 3DU7E |                                                                                                                        |               |

| chain1 | res1/atm1                  | distance | res2/atm2                   | chain2 | H-bonding                                                                                        | Charge interaction |
|--------|----------------------------|----------|-----------------------------|--------|--------------------------------------------------------------------------------------------------|--------------------|
| 3DU7A  | <a href="#">CYS376(SG)</a> | 4.55     | <a href="#">ILE234(O)</a>   | 3DU7A  |                                                                                                  |                    |
| 3DU7A  | <a href="#">CYS376(CB)</a> | 4.22     | <a href="#">SER237(CB)</a>  | 3DU7A  |                                                                                                  | C[ ] ... C[ ]      |
| 3DU7A  | <a href="#">CYS376(SG)</a> | 4.74     | <a href="#">SER237(CA)</a>  | 3DU7A  |                                                                                                  |                    |
| 3DU7A  | <a href="#">CYS376(SG)</a> | 4.57     | <a href="#">SER237(C)</a>   | 3DU7A  |                                                                                                  |                    |
| 3DU7A  | <a href="#">CYS376(SG)</a> | 4.90     | <a href="#">SER237(O)</a>   | 3DU7A  |                                                                                                  |                    |
| 3DU7A  | <a href="#">CYS376(SG)</a> | 3.73     | <a href="#">SER237(CB)</a>  | 3DU7A  |                                                                                                  | S[ ] ... C[ ]      |
| 3DU7A  | <a href="#">CYS376(SG)</a> | 4.70     | <a href="#">SER237(OG)</a>  | 3DU7A  | [D-A-AA]:89.9° [A-D-DD]:40.6°, maximum distance<br>exceeded, bad d_angle(sp3)                    |                    |
| 3DU7A  | <a href="#">CYS376(SG)</a> | 4.68     | <a href="#">ILE238(N)</a>   | 3DU7A  | [D-A-AA]:116.9° [A-D-DD]:102.1° d_planarity:81.8°,<br>maximum distance exceeded, bad d_planarity |                    |
| 3DU7A  | <a href="#">CYS376(SG)</a> | 4.48     | <a href="#">ILE238(CG1)</a> | 3DU7A  |                                                                                                  | S[ ] ... C[ ]      |
| 3DU7A  | <a href="#">CYS376(O)</a>  | 4.08     | <a href="#">ALA270(CA)</a>  | 3DU7A  |                                                                                                  | O[ ] ... C[ ]      |
| 3DU7A  | <a href="#">CYS376(O)</a>  | 3.86     | <a href="#">ALA270(C)</a>   | 3DU7A  |                                                                                                  | O[ ] ... C[ ]      |
| 3DU7A  | <a href="#">CYS376(O)</a>  | 4.95     | <a href="#">ALA270(O)</a>   | 3DU7A  |                                                                                                  |                    |

|       |                            |      |                             |       |                                                                                                                                        |               |
|-------|----------------------------|------|-----------------------------|-------|----------------------------------------------------------------------------------------------------------------------------------------|---------------|
| 3DU7A | <a href="#">CYS376(O)</a>  | 4.13 | <a href="#">ALA270(CB)</a>  | 3DU7A |                                                                                                                                        | O[ ] ... C[ ] |
| 3DU7A | <a href="#">CYS376(SG)</a> | 4.89 | <a href="#">ALA270(CB)</a>  | 3DU7A |                                                                                                                                        |               |
| 3DU7A | <a href="#">CYS376(N)</a>  | 4.62 | <a href="#">THR271(O)</a>   | 3DU7A | [D-A-AA]:114.0° [A-D-DD]:64.6° d_planarity:70.7°<br>a_planarity:71.8°, maximum distance exceeded,<br>bad d_angle(sp2), bad d_planarity |               |
| 3DU7A | <a href="#">CYS376(CA)</a> | 4.51 | <a href="#">THR271(C)</a>   | 3DU7A |                                                                                                                                        |               |
| 3DU7A | <a href="#">CYS376(CA)</a> | 4.20 | <a href="#">THR271(O)</a>   | 3DU7A |                                                                                                                                        | C[ ] ... O[ ] |
| 3DU7A | <a href="#">CYS376(C)</a>  | 4.08 | <a href="#">THR271(N)</a>   | 3DU7A |                                                                                                                                        | C[ ] ... N[ ] |
| 3DU7A | <a href="#">CYS376(C)</a>  | 4.58 | <a href="#">THR271(CA)</a>  | 3DU7A |                                                                                                                                        |               |
| 3DU7A | <a href="#">CYS376(C)</a>  | 4.23 | <a href="#">THR271(C)</a>   | 3DU7A |                                                                                                                                        | C[ ] ... C[ ] |
| 3DU7A | <a href="#">CYS376(C)</a>  | 4.06 | <a href="#">THR271(O)</a>   | 3DU7A |                                                                                                                                        | C[ ] ... O[ ] |
| 3DU7A | <a href="#">CYS376(C)</a>  | 4.91 | <a href="#">THR271(CB)</a>  | 3DU7A |                                                                                                                                        |               |
| 3DU7A | <a href="#">CYS376(O)</a>  | 2.90 | <a href="#">THR271(N)</a>   | 3DU7A | <b>H-bond</b> [D-A-AA]:158.6° [A-D-DD]:106.5° d_planarity:-<br>25.7° a_planarity:-90.0°                                                | O[ ] ... N[ ] |
| 3DU7A | <a href="#">CYS376(O)</a>  | 3.60 | <a href="#">THR271(CA)</a>  | 3DU7A |                                                                                                                                        | O[ ] ... C[ ] |
| 3DU7A | <a href="#">CYS376(O)</a>  | 3.52 | <a href="#">THR271(C)</a>   | 3DU7A |                                                                                                                                        | O[ ] ... C[ ] |
| 3DU7A | <a href="#">CYS376(O)</a>  | 3.67 | <a href="#">THR271(O)</a>   | 3DU7A |                                                                                                                                        | O[ ] ... O[ ] |
| 3DU7A | <a href="#">CYS376(O)</a>  | 4.13 | <a href="#">THR271(CB)</a>  | 3DU7A |                                                                                                                                        | O[ ] ... C[ ] |
| 3DU7A | <a href="#">CYS376(O)</a>  | 4.54 | <a href="#">THR271(OG1)</a> | 3DU7A | [D-A-AA]:129.1° [A-D-DD]:64.6° a_planarity:55.5°,<br>maximum distance exceeded                                                         |               |
| 3DU7A | <a href="#">CYS376(CA)</a> | 4.72 | <a href="#">TYR272(N)</a>   | 3DU7A |                                                                                                                                        |               |
| 3DU7A | <a href="#">CYS376(CA)</a> | 4.50 | <a href="#">TYR272(CA)</a>  | 3DU7A |                                                                                                                                        | C[ ] ... C[ ] |
| 3DU7A | <a href="#">CYS376(C)</a>  | 4.75 | <a href="#">TYR272(N)</a>   | 3DU7A |                                                                                                                                        |               |
| 3DU7A | <a href="#">CYS376(C)</a>  | 4.99 | <a href="#">TYR272(CA)</a>  | 3DU7A |                                                                                                                                        |               |
| 3DU7A | <a href="#">CYS376(O)</a>  | 4.04 | <a href="#">TYR272(N)</a>   | 3DU7A | [D-A-AA]:118.2° [A-D-DD]:103.0° d_planarity:60.3°<br>a_planarity:-37.5°, maximum distance exceeded,<br>bad d_planarity                 | O[ ] ... N[ ] |
| 3DU7A | <a href="#">CYS376(O)</a>  | 4.60 | <a href="#">TYR272(CA)</a>  | 3DU7A |                                                                                                                                        |               |
| 3DU7A | <a href="#">CYS376(SG)</a> | 4.94 | <a href="#">TYR272(N)</a>   | 3DU7A | [D-A-AA]:100.6° [A-D-DD]:78.1° d_planarity:-89.9°,<br>maximum distance exceeded, bad d_angle(sp2),<br>bad d_planarity                  |               |
| 3DU7A | <a href="#">CYS376(SG)</a> | 4.86 | <a href="#">TYR272(CA)</a>  | 3DU7A |                                                                                                                                        |               |
| 3DU7A | <a href="#">CYS376(SG)</a> | 4.80 | <a href="#">TYR272(CD1)</a> | 3DU7A |                                                                                                                                        |               |
| 3DU7A | <a href="#">CYS376(N)</a>  | 4.75 | <a href="#">ALA273(N)</a>   | 3DU7A |                                                                                                                                        |               |
| 3DU7A | <a href="#">CYS376(N)</a>  | 4.76 | <a href="#">ALA273(CB)</a>  | 3DU7A |                                                                                                                                        |               |
| 3DU7A | <a href="#">CYS376(CA)</a> | 4.91 | <a href="#">ALA273(N)</a>   | 3DU7A |                                                                                                                                        |               |
| 3DU7A | <a href="#">CYS376(N)</a>  | 4.17 | <a href="#">LEU318(N)</a>   | 3DU7A |                                                                                                                                        | N[ ] ... N[ ] |
| 3DU7A | <a href="#">CYS376(N)</a>  | 4.46 | <a href="#">LEU318(CA)</a>  | 3DU7A |                                                                                                                                        | N[ ] ... C[ ] |
| 3DU7A | <a href="#">CYS376(N)</a>  | 3.82 | <a href="#">LEU318(C)</a>   | 3DU7A |                                                                                                                                        | N[ ] ... C[ ] |
| 3DU7A | <a href="#">CYS376(N)</a>  | 2.74 | <a href="#">LEU318(O)</a>   | 3DU7A | [D-A-AA]:145.8° [A-D-DD]:106.6° d_planarity:-76.9°<br>a_planarity:-53.0°, bad d_planarity                                              | N[ ] ... O[ ] |
| 3DU7A | <a href="#">CYS376(N)</a>  | 4.83 | <a href="#">LEU318(CB)</a>  | 3DU7A |                                                                                                                                        |               |
| 3DU7A | <a href="#">CYS376(CA)</a> | 4.37 | <a href="#">LEU318(N)</a>   | 3DU7A |                                                                                                                                        | C[ ] ... N[ ] |
| 3DU7A | <a href="#">CYS376(CA)</a> | 4.70 | <a href="#">LEU318(CA)</a>  | 3DU7A |                                                                                                                                        |               |
| 3DU7A | <a href="#">CYS376(CA)</a> | 4.44 | <a href="#">LEU318(C)</a>   | 3DU7A |                                                                                                                                        | C[ ] ... C[ ] |
| 3DU7A | <a href="#">CYS376(CA)</a> | 3.45 | <a href="#">LEU318(O)</a>   | 3DU7A |                                                                                                                                        | C[ ] ... O[ ] |
| 3DU7A | <a href="#">CYS376(CA)</a> | 4.65 | <a href="#">LEU318(CB)</a>  | 3DU7A |                                                                                                                                        |               |
| 3DU7A | <a href="#">CYS376(C)</a>  | 4.44 | <a href="#">LEU318(N)</a>   | 3DU7A |                                                                                                                                        | C[ ] ... N[ ] |
| 3DU7A | <a href="#">CYS376(C)</a>  | 4.50 | <a href="#">LEU318(O)</a>   | 3DU7A |                                                                                                                                        | C[ ] ... O[ ] |
| 3DU7A | <a href="#">CYS376(CB)</a> | 4.07 | <a href="#">LEU318(N)</a>   | 3DU7A |                                                                                                                                        | C[ ] ... N[ ] |
| 3DU7A | <a href="#">CYS376(CB)</a> | 4.03 | <a href="#">LEU318(CA)</a>  | 3DU7A |                                                                                                                                        | C[ ] ... C[ ] |
| 3DU7A | <a href="#">CYS376(CB)</a> | 3.92 | <a href="#">LEU318(C)</a>   | 3DU7A |                                                                                                                                        | C[ ] ... C[ ] |

|       |                             |      |                              |       |                                                                                                                       |               |
|-------|-----------------------------|------|------------------------------|-------|-----------------------------------------------------------------------------------------------------------------------|---------------|
| 3DU7A | <a href="#">CYS376</a> (CB) | 3.07 | <a href="#">LEU318</a> (O)   | 3DU7A |                                                                                                                       | C[ ] ... O[ ] |
| 3DU7A | <a href="#">CYS376</a> (CB) | 3.57 | <a href="#">LEU318</a> (CB)  | 3DU7A |                                                                                                                       | C[ ] ... C[ ] |
| 3DU7A | <a href="#">CYS376</a> (CB) | 4.95 | <a href="#">LEU318</a> (CG)  | 3DU7A |                                                                                                                       |               |
| 3DU7A | <a href="#">CYS376</a> (SG) | 4.76 | <a href="#">LEU318</a> (O)   | 3DU7A |                                                                                                                       |               |
| 3DU7A | <a href="#">CYS376</a> (SG) | 4.64 | <a href="#">LEU318</a> (CB)  | 3DU7A |                                                                                                                       |               |
| 3DU7A | <a href="#">CYS376</a> (N)  | 4.86 | <a href="#">TYR319</a> (N)   | 3DU7A |                                                                                                                       |               |
| 3DU7A | <a href="#">CYS376</a> (N)  | 4.57 | <a href="#">ALA374</a> (C)   | 3DU7A |                                                                                                                       |               |
| 3DU7A | <a href="#">CYS376</a> (N)  | 4.64 | <a href="#">ALA374</a> (O)   | 3DU7A | [D-A-AA]:79.3° [A-D-DD]:135.7° d_planarity:44.3°<br>a_planarity:18.5°, maximum distance exceeded,<br>bad a_angle(sp2) |               |
| 3DU7A | <a href="#">CYS376</a> (N)  | 3.68 | <a href="#">VAL375</a> (N)   | 3DU7A |                                                                                                                       | N[ ] ... N[ ] |
| 3DU7A | <a href="#">CYS376</a> (N)  | 2.42 | <a href="#">VAL375</a> (CA)  | 3DU7A |                                                                                                                       | N[ ] ... C[ ] |
| 3DU7A | <a href="#">CYS376</a> (N)  | 2.24 | <a href="#">VAL375</a> (O)   | 3DU7A | [D-A-AA]:30.0° [A-D-DD]:91.1° d_planarity:1.6°<br>a_planarity:2.0°, bad a_angle(sp2)                                  | N[ ] ... O[ ] |
| 3DU7A | <a href="#">CYS376</a> (N)  | 2.86 | <a href="#">VAL375</a> (CB)  | 3DU7A |                                                                                                                       | N[ ] ... C[ ] |
| 3DU7A | <a href="#">CYS376</a> (N)  | 2.91 | <a href="#">VAL375</a> (CG1) | 3DU7A |                                                                                                                       | N[ ] ... C[ ] |
| 3DU7A | <a href="#">CYS376</a> (N)  | 4.35 | <a href="#">VAL375</a> (CG2) | 3DU7A |                                                                                                                       | N[ ] ... C[ ] |
| 3DU7A | <a href="#">CYS376</a> (CA) | 4.85 | <a href="#">VAL375</a> (N)   | 3DU7A |                                                                                                                       |               |
| 3DU7A | <a href="#">CYS376</a> (CA) | 3.77 | <a href="#">VAL375</a> (CA)  | 3DU7A |                                                                                                                       | C[ ] ... C[ ] |
| 3DU7A | <a href="#">CYS376</a> (CA) | 2.39 | <a href="#">VAL375</a> (C)   | 3DU7A |                                                                                                                       | C[ ] ... C[ ] |
| 3DU7A | <a href="#">CYS376</a> (CA) | 2.69 | <a href="#">VAL375</a> (O)   | 3DU7A |                                                                                                                       | C[ ] ... O[ ] |
| 3DU7A | <a href="#">CYS376</a> (CA) | 4.20 | <a href="#">VAL375</a> (CB)  | 3DU7A |                                                                                                                       | C[ ] ... C[ ] |
| 3DU7A | <a href="#">CYS376</a> (CA) | 4.23 | <a href="#">VAL375</a> (CG1) | 3DU7A |                                                                                                                       | C[ ] ... C[ ] |
| 3DU7A | <a href="#">CYS376</a> (C)  | 4.98 | <a href="#">VAL375</a> (CA)  | 3DU7A |                                                                                                                       |               |
| 3DU7A | <a href="#">CYS376</a> (C)  | 3.73 | <a href="#">VAL375</a> (C)   | 3DU7A |                                                                                                                       | C[ ] ... C[ ] |
| 3DU7A | <a href="#">CYS376</a> (C)  | 4.09 | <a href="#">VAL375</a> (O)   | 3DU7A |                                                                                                                       | C[ ] ... O[ ] |
| 3DU7A | <a href="#">CYS376</a> (C)  | 4.79 | <a href="#">VAL375</a> (CG1) | 3DU7A |                                                                                                                       |               |
| 3DU7A | <a href="#">CYS376</a> (O)  | 4.60 | <a href="#">VAL375</a> (C)   | 3DU7A |                                                                                                                       |               |
| 3DU7A | <a href="#">CYS376</a> (O)  | 4.69 | <a href="#">VAL375</a> (O)   | 3DU7A |                                                                                                                       |               |
| 3DU7A | <a href="#">CYS376</a> (CB) | 4.46 | <a href="#">VAL375</a> (CA)  | 3DU7A |                                                                                                                       | C[ ] ... C[ ] |
| 3DU7A | <a href="#">CYS376</a> (CB) | 3.15 | <a href="#">VAL375</a> (C)   | 3DU7A |                                                                                                                       | C[ ] ... C[ ] |
| 3DU7A | <a href="#">CYS376</a> (CB) | 3.28 | <a href="#">VAL375</a> (O)   | 3DU7A |                                                                                                                       | C[ ] ... O[ ] |
| 3DU7A | <a href="#">CYS376</a> (SG) | 4.46 | <a href="#">VAL375</a> (C)   | 3DU7A |                                                                                                                       | S[ ] ... C[ ] |
| 3DU7A | <a href="#">CYS376</a> (SG) | 4.16 | <a href="#">VAL375</a> (O)   | 3DU7A |                                                                                                                       | S[ ] ... O[ ] |
| 3DU7A | <a href="#">CYS376</a> (N)  | 3.01 | <a href="#">MET377</a> (N)   | 3DU7A |                                                                                                                       | N[ ] ... N[ ] |
| 3DU7A | <a href="#">CYS376</a> (N)  | 4.40 | <a href="#">MET377</a> (CA)  | 3DU7A |                                                                                                                       | N[ ] ... C[ ] |
| 3DU7A | <a href="#">CYS376</a> (N)  | 4.83 | <a href="#">MET377</a> (CB)  | 3DU7A |                                                                                                                       |               |
| 3DU7A | <a href="#">CYS376</a> (CA) | 2.44 | <a href="#">MET377</a> (N)   | 3DU7A |                                                                                                                       | C[ ] ... N[ ] |
| 3DU7A | <a href="#">CYS376</a> (CA) | 3.82 | <a href="#">MET377</a> (CA)  | 3DU7A |                                                                                                                       | C[ ] ... C[ ] |
| 3DU7A | <a href="#">CYS376</a> (CA) | 4.49 | <a href="#">MET377</a> (C)   | 3DU7A |                                                                                                                       | C[ ] ... C[ ] |
| 3DU7A | <a href="#">CYS376</a> (CA) | 4.65 | <a href="#">MET377</a> (O)   | 3DU7A |                                                                                                                       |               |
| 3DU7A | <a href="#">CYS376</a> (CA) | 4.43 | <a href="#">MET377</a> (CB)  | 3DU7A |                                                                                                                       | C[ ] ... C[ ] |
| 3DU7A | <a href="#">CYS376</a> (C)  | 2.44 | <a href="#">MET377</a> (CA)  | 3DU7A |                                                                                                                       | C[ ] ... C[ ] |
| 3DU7A | <a href="#">CYS376</a> (C)  | 3.01 | <a href="#">MET377</a> (C)   | 3DU7A |                                                                                                                       | C[ ] ... C[ ] |
| 3DU7A | <a href="#">CYS376</a> (C)  | 3.17 | <a href="#">MET377</a> (O)   | 3DU7A |                                                                                                                       | C[ ] ... O[ ] |
| 3DU7A | <a href="#">CYS376</a> (C)  | 3.13 | <a href="#">MET377</a> (CB)  | 3DU7A |                                                                                                                       | C[ ] ... C[ ] |
| 3DU7A | <a href="#">CYS376</a> (C)  | 4.53 | <a href="#">MET377</a> (CG)  | 3DU7A |                                                                                                                       |               |
| 3DU7A | <a href="#">CYS376</a> (O)  | 2.26 | <a href="#">MET377</a> (N)   | 3DU7A | [D-A-AA]:29.6° [A-D-DD]:94.5° d_planarity:4.7°<br>a_planarity:3.0°, bad a_angle(sp2)                                  | O[ ] ... N[ ] |
| 3DU7A | <a href="#">CYS376</a> (O)  | 2.79 | <a href="#">MET377</a> (CA)  | 3DU7A |                                                                                                                       | O[ ] ... C[ ] |

|       |                            |      |                             |       |                                                                                                                       |               |
|-------|----------------------------|------|-----------------------------|-------|-----------------------------------------------------------------------------------------------------------------------|---------------|
| 3DU7A | <a href="#">CYS376(O)</a>  | 2.80 | <a href="#">MET377(C)</a>   | 3DU7A |                                                                                                                       | O[ ] ... C[ ] |
| 3DU7A | <a href="#">CYS376(O)</a>  | 2.47 | <a href="#">MET377(O)</a>   | 3DU7A |                                                                                                                       | O[ ] ... O[ ] |
| 3DU7A | <a href="#">CYS376(O)</a>  | 3.27 | <a href="#">MET377(CB)</a>  | 3DU7A |                                                                                                                       | O[ ] ... C[ ] |
| 3DU7A | <a href="#">CYS376(O)</a>  | 4.43 | <a href="#">MET377(CG)</a>  | 3DU7A |                                                                                                                       | O[ ] ... C[ ] |
| 3DU7A | <a href="#">CYS376(CB)</a> | 3.20 | <a href="#">MET377(N)</a>   | 3DU7A |                                                                                                                       | C[ ] ... N[ ] |
| 3DU7A | <a href="#">CYS376(CB)</a> | 4.54 | <a href="#">MET377(CA)</a>  | 3DU7A |                                                                                                                       |               |
| 3DU7A | <a href="#">CYS376(CB)</a> | 4.93 | <a href="#">MET377(C)</a>   | 3DU7A |                                                                                                                       |               |
| 3DU7A | <a href="#">CYS376(SG)</a> | 4.13 | <a href="#">MET377(N)</a>   | 3DU7A | [D-A-AA]:47.0° [A-D-DD]:129.9° d_planarity:39.8°,<br>maximum distance exceeded, bad a_angle(sp3)                      | S[ ] ... N[ ] |
| 3DU7A | <a href="#">CYS376(SG)</a> | 4.93 | <a href="#">MET377(O)</a>   | 3DU7A |                                                                                                                       |               |
| 3DU7A | <a href="#">CYS376(C)</a>  | 4.00 | <a href="#">LEU378(N)</a>   | 3DU7A |                                                                                                                       | C[ ] ... N[ ] |
| 3DU7A | <a href="#">CYS376(C)</a>  | 4.96 | <a href="#">LEU378(CD2)</a> | 3DU7A |                                                                                                                       |               |
| 3DU7A | <a href="#">CYS376(O)</a>  | 3.94 | <a href="#">LEU378(N)</a>   | 3DU7A | [D-A-AA]:84.1° [A-D-DD]:121.3° d_planarity:30.1°<br>a_planarity:28.3°, maximum distance exceeded,<br>bad a_angle(sp2) | O[ ] ... N[ ] |
| 3DU7A | <a href="#">CYS376(O)</a>  | 4.84 | <a href="#">LEU378(CA)</a>  | 3DU7A |                                                                                                                       |               |
| 3DU7A | <a href="#">CYS376(O)</a>  | 4.90 | <a href="#">LEU378(CG)</a>  | 3DU7A |                                                                                                                       |               |
| 3DU7A | <a href="#">CYS376(O)</a>  | 4.46 | <a href="#">LEU378(CD2)</a> | 3DU7A |                                                                                                                       | O[ ] ... C[ ] |
| 3DU7A | <a href="#">CYS376(SG)</a> | 4.55 | <a href="#">LEU378(CD2)</a> | 3DU7A |                                                                                                                       |               |

| chain1 | res1/atm1                  | distance | res2/atm2                   | chain2 | H-bonding                                                                                         | Charge interaction |
|--------|----------------------------|----------|-----------------------------|--------|---------------------------------------------------------------------------------------------------|--------------------|
| 1CTSA  | <a href="#">CYS184(SG)</a> | 4.83     | <a href="#">ALA118(C)</a>   | 1CTSA  |                                                                                                   |                    |
| 1CTSA  | <a href="#">CYS184(SG)</a> | 4.97     | <a href="#">ALA118(O)</a>   | 1CTSA  |                                                                                                   |                    |
| 1CTSA  | <a href="#">CYS184(SG)</a> | 4.54     | <a href="#">ALA118(CB)</a>  | 1CTSA  |                                                                                                   |                    |
| 1CTSA  | <a href="#">CYS184(O)</a>  | 4.78     | <a href="#">LEU120(CD2)</a> | 1CTSA  |                                                                                                   |                    |
| 1CTSA  | <a href="#">CYS184(CB)</a> | 4.73     | <a href="#">LEU120(CG)</a>  | 1CTSA  |                                                                                                   |                    |
| 1CTSA  | <a href="#">CYS184(CB)</a> | 3.94     | <a href="#">LEU120(CD1)</a> | 1CTSA  |                                                                                                   | C[ ] ... C[ ]      |
| 1CTSA  | <a href="#">CYS184(CB)</a> | 4.47     | <a href="#">LEU120(CD2)</a> | 1CTSA  |                                                                                                   | C[ ] ... C[ ]      |
| 1CTSA  | <a href="#">CYS184(SG)</a> | 4.63     | <a href="#">LEU120(CD1)</a> | 1CTSA  |                                                                                                   |                    |
| 1CTSA  | <a href="#">CYS184(O)</a>  | 4.98     | <a href="#">LEU128(CD1)</a> | 1CTSA  |                                                                                                   |                    |
| 1CTSA  | <a href="#">CYS184(N)</a>  | 4.73     | <a href="#">ALA180(O)</a>   | 1CTSA  | [D-A-AA]:118.4° [A-D-DD]:116.1° d_planarity:-8.2°<br>a_planarity:47.9°, maximum distance exceeded |                    |
| 1CTSA  | <a href="#">CYS184(SG)</a> | 4.04     | <a href="#">ALA180(O)</a>   | 1CTSA  |                                                                                                   | S[ ] ... O[ ]      |
| 1CTSA  | <a href="#">CYS184(N)</a>  | 4.73     | <a href="#">LYS181(CA)</a>  | 1CTSA  |                                                                                                   |                    |
| 1CTSA  | <a href="#">CYS184(N)</a>  | 3.75     | <a href="#">LYS181(C)</a>   | 1CTSA  |                                                                                                   | N[ ] ... C[ ]      |
| 1CTSA  | <a href="#">CYS184(N)</a>  | 3.09     | <a href="#">LYS181(O)</a>   | 1CTSA  | <b>H-bond</b> [D-A-AA]:112.3° [A-D-DD]:90.8° d_planarity:-46.2°<br>a_planarity:72.7°              | N[ ] ... O[ ]      |
| 1CTSA  | <a href="#">CYS184(CA)</a> | 4.41     | <a href="#">LYS181(C)</a>   | 1CTSA  |                                                                                                   | C[ ] ... C[ ]      |
| 1CTSA  | <a href="#">CYS184(CA)</a> | 3.44     | <a href="#">LYS181(O)</a>   | 1CTSA  |                                                                                                   | C[ ] ... O[ ]      |
| 1CTSA  | <a href="#">CYS184(C)</a>  | 4.81     | <a href="#">LYS181(C)</a>   | 1CTSA  |                                                                                                   |                    |
| 1CTSA  | <a href="#">CYS184(C)</a>  | 3.65     | <a href="#">LYS181(O)</a>   | 1CTSA  |                                                                                                   | C[ ] ... O[ ]      |
| 1CTSA  | <a href="#">CYS184(O)</a>  | 4.77     | <a href="#">LYS181(O)</a>   | 1CTSA  |                                                                                                   |                    |
| 1CTSA  | <a href="#">CYS184(CB)</a> | 4.61     | <a href="#">LYS181(CA)</a>  | 1CTSA  |                                                                                                   |                    |
| 1CTSA  | <a href="#">CYS184(CB)</a> | 4.15     | <a href="#">LYS181(C)</a>   | 1CTSA  |                                                                                                   | C[ ] ... C[ ]      |
| 1CTSA  | <a href="#">CYS184(CB)</a> | 3.20     | <a href="#">LYS181(O)</a>   | 1CTSA  |                                                                                                   | C[ ] ... O[ ]      |
| 1CTSA  | <a href="#">CYS184(SG)</a> | 4.45     | <a href="#">LYS181(CA)</a>  | 1CTSA  | Weakly positive                                                                                   | S[ ] ... C[ ]      |

|       |                            |      |                             |       |                                                                                                          |               |
|-------|----------------------------|------|-----------------------------|-------|----------------------------------------------------------------------------------------------------------|---------------|
| 1CTSA | <a href="#">CYS184(SG)</a> | 4.49 | <a href="#">LYS181(C)</a>   | 1CTSA |                                                                                                          | S[ ] ... C[ ] |
| 1CTSA | <a href="#">CYS184(SG)</a> | 3.98 | <a href="#">LYS181(O)</a>   | 1CTSA |                                                                                                          | S[ ] ... O[ ] |
| 1CTSA | <a href="#">CYS184(N)</a>  | 4.30 | <a href="#">LEU182(N)</a>   | 1CTSA |                                                                                                          | N[ ] ... N[ ] |
| 1CTSA | <a href="#">CYS184(N)</a>  | 4.29 | <a href="#">LEU182(CA)</a>  | 1CTSA |                                                                                                          | N[ ] ... C[ ] |
| 1CTSA | <a href="#">CYS184(N)</a>  | 3.18 | <a href="#">LEU182(C)</a>   | 1CTSA |                                                                                                          | N[ ] ... C[ ] |
| 1CTSA | <a href="#">CYS184(N)</a>  | 3.20 | <a href="#">LEU182(O)</a>   | 1CTSA | [D-A-AA]:77.7° [A-D-DD]:115.8° d_planarity:71.6°<br>a_planarity:52.6°, bad a_angle(sp2), bad d_planarity | N[ ] ... O[ ] |
| 1CTSA | <a href="#">CYS184(CA)</a> | 4.33 | <a href="#">LEU182(C)</a>   | 1CTSA |                                                                                                          | C[ ] ... C[ ] |
| 1CTSA | <a href="#">CYS184(CA)</a> | 4.06 | <a href="#">LEU182(O)</a>   | 1CTSA |                                                                                                          | C[ ] ... O[ ] |
| 1CTSA | <a href="#">CYS184(C)</a>  | 4.42 | <a href="#">LEU182(C)</a>   | 1CTSA |                                                                                                          | C[ ] ... C[ ] |
| 1CTSA | <a href="#">CYS184(C)</a>  | 3.75 | <a href="#">LEU182(O)</a>   | 1CTSA |                                                                                                          | C[ ] ... O[ ] |
| 1CTSA | <a href="#">CYS184(O)</a>  | 4.82 | <a href="#">LEU182(O)</a>   | 1CTSA |                                                                                                          |               |
| 1CTSA | <a href="#">CYS184(N)</a>  | 2.84 | <a href="#">PRO183(N)</a>   | 1CTSA |                                                                                                          | N[ ] ... N[ ] |
| 1CTSA | <a href="#">CYS184(N)</a>  | 2.41 | <a href="#">PRO183(CA)</a>  | 1CTSA |                                                                                                          | N[ ] ... C[ ] |
| 1CTSA | <a href="#">CYS184(N)</a>  | 2.28 | <a href="#">PRO183(O)</a>   | 1CTSA | [D-A-AA]:27.7° [A-D-DD]:96.3° d_planarity:2.3°<br>a_planarity:5.3°, bad a_angle(sp2)                     | N[ ] ... O[ ] |
| 1CTSA | <a href="#">CYS184(N)</a>  | 3.00 | <a href="#">PRO183(CB)</a>  | 1CTSA |                                                                                                          | N[ ] ... C[ ] |
| 1CTSA | <a href="#">CYS184(N)</a>  | 3.82 | <a href="#">PRO183(CG)</a>  | 1CTSA |                                                                                                          | N[ ] ... C[ ] |
| 1CTSA | <a href="#">CYS184(N)</a>  | 3.72 | <a href="#">PRO183(CD)</a>  | 1CTSA |                                                                                                          | N[ ] ... C[ ] |
| 1CTSA | <a href="#">CYS184(CA)</a> | 4.24 | <a href="#">PRO183(N)</a>   | 1CTSA |                                                                                                          | C[ ] ... N[ ] |
| 1CTSA | <a href="#">CYS184(CA)</a> | 3.80 | <a href="#">PRO183(CA)</a>  | 1CTSA |                                                                                                          | C[ ] ... C[ ] |
| 1CTSA | <a href="#">CYS184(CA)</a> | 2.44 | <a href="#">PRO183(C)</a>   | 1CTSA |                                                                                                          | C[ ] ... C[ ] |
| 1CTSA | <a href="#">CYS184(CA)</a> | 2.84 | <a href="#">PRO183(O)</a>   | 1CTSA |                                                                                                          | C[ ] ... O[ ] |
| 1CTSA | <a href="#">CYS184(CA)</a> | 4.34 | <a href="#">PRO183(CB)</a>  | 1CTSA |                                                                                                          | C[ ] ... C[ ] |
| 1CTSA | <a href="#">CYS184(C)</a>  | 4.74 | <a href="#">PRO183(N)</a>   | 1CTSA |                                                                                                          |               |
| 1CTSA | <a href="#">CYS184(C)</a>  | 4.42 | <a href="#">PRO183(CA)</a>  | 1CTSA |                                                                                                          | C[ ] ... C[ ] |
| 1CTSA | <a href="#">CYS184(C)</a>  | 3.03 | <a href="#">PRO183(C)</a>   | 1CTSA |                                                                                                          | C[ ] ... C[ ] |
| 1CTSA | <a href="#">CYS184(C)</a>  | 3.00 | <a href="#">PRO183(O)</a>   | 1CTSA |                                                                                                          | C[ ] ... O[ ] |
| 1CTSA | <a href="#">CYS184(O)</a>  | 4.03 | <a href="#">PRO183(C)</a>   | 1CTSA |                                                                                                          | O[ ] ... C[ ] |
| 1CTSA | <a href="#">CYS184(O)</a>  | 3.72 | <a href="#">PRO183(O)</a>   | 1CTSA |                                                                                                          | O[ ] ... O[ ] |
| 1CTSA | <a href="#">CYS184(CB)</a> | 4.89 | <a href="#">PRO183(CA)</a>  | 1CTSA |                                                                                                          |               |
| 1CTSA | <a href="#">CYS184(CB)</a> | 3.74 | <a href="#">PRO183(C)</a>   | 1CTSA |                                                                                                          | C[ ] ... C[ ] |
| 1CTSA | <a href="#">CYS184(CB)</a> | 4.35 | <a href="#">PRO183(O)</a>   | 1CTSA |                                                                                                          | C[ ] ... O[ ] |
| 1CTSA | <a href="#">CYS184(SG)</a> | 4.48 | <a href="#">PRO183(C)</a>   | 1CTSA |                                                                                                          | S[ ] ... C[ ] |
| 1CTSA | <a href="#">CYS184(N)</a>  | 2.80 | <a href="#">VAL185(N)</a>   | 1CTSA |                                                                                                          | N[ ] ... N[ ] |
| 1CTSA | <a href="#">CYS184(N)</a>  | 4.24 | <a href="#">VAL185(CA)</a>  | 1CTSA |                                                                                                          | N[ ] ... C[ ] |
| 1CTSA | <a href="#">CYS184(N)</a>  | 4.84 | <a href="#">VAL185(C)</a>   | 1CTSA |                                                                                                          |               |
| 1CTSA | <a href="#">CYS184(CA)</a> | 2.40 | <a href="#">VAL185(N)</a>   | 1CTSA |                                                                                                          | C[ ] ... N[ ] |
| 1CTSA | <a href="#">CYS184(CA)</a> | 3.75 | <a href="#">VAL185(CA)</a>  | 1CTSA |                                                                                                          | C[ ] ... C[ ] |
| 1CTSA | <a href="#">CYS184(CA)</a> | 4.44 | <a href="#">VAL185(C)</a>   | 1CTSA |                                                                                                          | C[ ] ... C[ ] |
| 1CTSA | <a href="#">CYS184(CA)</a> | 4.84 | <a href="#">VAL185(CB)</a>  | 1CTSA |                                                                                                          |               |
| 1CTSA | <a href="#">CYS184(C)</a>  | 2.36 | <a href="#">VAL185(CA)</a>  | 1CTSA |                                                                                                          | C[ ] ... C[ ] |
| 1CTSA | <a href="#">CYS184(C)</a>  | 3.01 | <a href="#">VAL185(C)</a>   | 1CTSA |                                                                                                          | C[ ] ... C[ ] |
| 1CTSA | <a href="#">CYS184(C)</a>  | 3.80 | <a href="#">VAL185(O)</a>   | 1CTSA |                                                                                                          | C[ ] ... O[ ] |
| 1CTSA | <a href="#">CYS184(C)</a>  | 3.67 | <a href="#">VAL185(CB)</a>  | 1CTSA |                                                                                                          | C[ ] ... C[ ] |
| 1CTSA | <a href="#">CYS184(C)</a>  | 4.94 | <a href="#">VAL185(CG1)</a> | 1CTSA |                                                                                                          |               |
| 1CTSA | <a href="#">CYS184(C)</a>  | 4.13 | <a href="#">VAL185(CG2)</a> | 1CTSA |                                                                                                          | C[ ] ... C[ ] |
| 1CTSA | <a href="#">CYS184(O)</a>  | 2.22 | <a href="#">VAL185(N)</a>   | 1CTSA | [D-A-AA]:29.6° [A-D-DD]:89.4° d_planarity:1.4°<br>a_planarity:13.1°, bad a_angle(sp2), bad d_angle(sp2)  | O[ ] ... N[ ] |
| 1CTSA | <a href="#">CYS184(O)</a>  | 2.65 | <a href="#">VAL185(CA)</a>  | 1CTSA |                                                                                                          | O[ ] ... C[ ] |

|       |                            |      |                             |       |                                                                                                                                        |               |
|-------|----------------------------|------|-----------------------------|-------|----------------------------------------------------------------------------------------------------------------------------------------|---------------|
| 1CTSA | <a href="#">CYS184(O)</a>  | 3.02 | <a href="#">VAL185(C)</a>   | 1CTSA |                                                                                                                                        | O[ ] ... C[ ] |
| 1CTSA | <a href="#">CYS184(O)</a>  | 3.40 | <a href="#">VAL185(O)</a>   | 1CTSA |                                                                                                                                        | O[ ] ... O[ ] |
| 1CTSA | <a href="#">CYS184(O)</a>  | 4.14 | <a href="#">VAL185(CB)</a>  | 1CTSA |                                                                                                                                        | O[ ] ... C[ ] |
| 1CTSA | <a href="#">CYS184(O)</a>  | 4.66 | <a href="#">VAL185(CG2)</a> | 1CTSA |                                                                                                                                        |               |
| 1CTSA | <a href="#">CYS184(CB)</a> | 3.14 | <a href="#">VAL185(N)</a>   | 1CTSA |                                                                                                                                        | C[ ] ... N[ ] |
| 1CTSA | <a href="#">CYS184(CB)</a> | 4.35 | <a href="#">VAL185(CA)</a>  | 1CTSA |                                                                                                                                        | C[ ] ... C[ ] |
| 1CTSA | <a href="#">CYS184(CB)</a> | 4.93 | <a href="#">VAL185(CG2)</a> | 1CTSA |                                                                                                                                        |               |
| 1CTSA | <a href="#">CYS184(SG)</a> | 4.81 | <a href="#">VAL185(N)</a>   | 1CTSA | [D-A-AA]:18.3° [A-D-DD]:148.1° d_planarity:66.6°,<br>maximum distance exceeded, bad a_angle(sp3),<br>bad d_planarity                   |               |
| 1CTSA | <a href="#">CYS184(N)</a>  | 4.56 | <a href="#">ALA186(N)</a>   | 1CTSA |                                                                                                                                        |               |
| 1CTSA | <a href="#">CYS184(CA)</a> | 4.54 | <a href="#">ALA186(N)</a>   | 1CTSA |                                                                                                                                        |               |
| 1CTSA | <a href="#">CYS184(C)</a>  | 3.36 | <a href="#">ALA186(N)</a>   | 1CTSA |                                                                                                                                        | C[ ] ... N[ ] |
| 1CTSA | <a href="#">CYS184(C)</a>  | 4.60 | <a href="#">ALA186(CA)</a>  | 1CTSA |                                                                                                                                        |               |
| 1CTSA | <a href="#">CYS184(C)</a>  | 4.74 | <a href="#">ALA186(C)</a>   | 1CTSA |                                                                                                                                        |               |
| 1CTSA | <a href="#">CYS184(O)</a>  | 3.66 | <a href="#">ALA186(N)</a>   | 1CTSA | [D-A-AA]:66.5° [A-D-DD]:130.2° d_planarity:66.2°<br>a_planarity:34.3°, maximum distance exceeded,<br>bad a_angle(sp2), bad d_planarity | O[ ] ... N[ ] |
| 1CTSA | <a href="#">CYS184(O)</a>  | 4.74 | <a href="#">ALA186(CA)</a>  | 1CTSA |                                                                                                                                        |               |
| 1CTSA | <a href="#">CYS184(O)</a>  | 4.62 | <a href="#">ALA186(C)</a>   | 1CTSA |                                                                                                                                        |               |
| 1CTSA | <a href="#">CYS184(N)</a>  | 4.86 | <a href="#">ALA187(N)</a>   | 1CTSA |                                                                                                                                        |               |
| 1CTSA | <a href="#">CYS184(N)</a>  | 4.70 | <a href="#">ALA187(CB)</a>  | 1CTSA |                                                                                                                                        |               |
| 1CTSA | <a href="#">CYS184(CA)</a> | 4.75 | <a href="#">ALA187(N)</a>   | 1CTSA |                                                                                                                                        |               |
| 1CTSA | <a href="#">CYS184(CA)</a> | 4.39 | <a href="#">ALA187(CB)</a>  | 1CTSA |                                                                                                                                        | C[ ] ... C[ ] |
| 1CTSA | <a href="#">CYS184(C)</a>  | 4.03 | <a href="#">ALA187(N)</a>   | 1CTSA |                                                                                                                                        | C[ ] ... N[ ] |
| 1CTSA | <a href="#">CYS184(C)</a>  | 4.67 | <a href="#">ALA187(CA)</a>  | 1CTSA |                                                                                                                                        |               |
| 1CTSA | <a href="#">CYS184(C)</a>  | 4.95 | <a href="#">ALA187(C)</a>   | 1CTSA |                                                                                                                                        |               |
| 1CTSA | <a href="#">CYS184(C)</a>  | 4.31 | <a href="#">ALA187(CB)</a>  | 1CTSA |                                                                                                                                        | C[ ] ... C[ ] |
| 1CTSA | <a href="#">CYS184(O)</a>  | 3.95 | <a href="#">ALA187(N)</a>   | 1CTSA | [D-A-AA]:84.8° [A-D-DD]:95.6° d_planarity:-58.2°<br>a_planarity:75.0°, maximum distance exceeded,<br>bad a_angle(sp2)                  | O[ ] ... N[ ] |
| 1CTSA | <a href="#">CYS184(O)</a>  | 4.35 | <a href="#">ALA187(CA)</a>  | 1CTSA |                                                                                                                                        | O[ ] ... C[ ] |
| 1CTSA | <a href="#">CYS184(O)</a>  | 4.26 | <a href="#">ALA187(C)</a>   | 1CTSA |                                                                                                                                        | O[ ] ... C[ ] |
| 1CTSA | <a href="#">CYS184(O)</a>  | 4.10 | <a href="#">ALA187(CB)</a>  | 1CTSA |                                                                                                                                        | O[ ] ... C[ ] |
| 1CTSA | <a href="#">CYS184(C)</a>  | 4.30 | <a href="#">LYS188(N)</a>   | 1CTSA |                                                                                                                                        | C[ ] ... N[ ] |
| 1CTSA | <a href="#">CYS184(C)</a>  | 4.36 | <a href="#">LYS188(CB)</a>  | 1CTSA |                                                                                                                                        | C[ ] ... C[ ] |
| 1CTSA | <a href="#">CYS184(O)</a>  | 3.46 | <a href="#">LYS188(N)</a>   | 1CTSA | <b>H-bond</b> [D-A-AA]:125.7° [A-D-DD]:100.2° d_planarity:-<br>44.6° a_planarity:72.3°                                                 | O[ ] ... N[ ] |
| 1CTSA | <a href="#">CYS184(O)</a>  | 3.97 | <a href="#">LYS188(CA)</a>  | 1CTSA |                                                                                                                                        | O[ ] ... C[ ] |
| 1CTSA | <a href="#">CYS184(O)</a>  | 3.17 | <a href="#">LYS188(CB)</a>  | 1CTSA |                                                                                                                                        | O[ ] ... C[ ] |
| 1CTSA | <a href="#">CYS184(O)</a>  | 4.35 | <a href="#">LYS188(CG)</a>  | 1CTSA |                                                                                                                                        | O[ ] ... C[ ] |
| 1CTSA | <a href="#">CYS184(O)</a>  | 4.30 | <a href="#">LYS188(CD)</a>  | 1CTSA |                                                                                                                                        | O[ ] ... C[ ] |
| 1CTSA | <a href="#">CYS184(CA)</a> | 4.39 | <a href="#">ILE200(CD1)</a> | 1CTSA |                                                                                                                                        | C[ ] ... C[ ] |
| 1CTSA | <a href="#">CYS184(C)</a>  | 4.78 | <a href="#">ILE200(CD1)</a> | 1CTSA |                                                                                                                                        |               |
| 1CTSA | <a href="#">CYS184(O)</a>  | 4.53 | <a href="#">ILE200(CG2)</a> | 1CTSA |                                                                                                                                        |               |
| 1CTSA | <a href="#">CYS184(O)</a>  | 4.16 | <a href="#">ILE200(CD1)</a> | 1CTSA |                                                                                                                                        | O[ ] ... C[ ] |
| 1CTSA | <a href="#">CYS184(CB)</a> | 4.41 | <a href="#">ILE200(CD1)</a> | 1CTSA |                                                                                                                                        | C[ ] ... C[ ] |
| 1CTSA | <a href="#">CYS184(SG)</a> | 4.90 | <a href="#">ILE200(CD1)</a> | 1CTSA |                                                                                                                                        |               |
| 1CTSA | <a href="#">CYS184(SG)</a> | 4.86 | <a href="#">ILE203(CG1)</a> | 1CTSA |                                                                                                                                        |               |
| 1CTSA | <a href="#">CYS184(SG)</a> | 4.23 | <a href="#">ILE203(CD1)</a> | 1CTSA |                                                                                                                                        | S[ ] ... C[ ] |
| 1CTSA | <a href="#">CYS184(N)</a>  | 4.56 | <a href="#">MET216(SD)</a>  | 1CTSA | [D-A-AA]:138.8° [A-D-DD]:70.2° d_planarity:76.3°,                                                                                      |               |

|       |                            |      |                            |       |                                                                 |               |
|-------|----------------------------|------|----------------------------|-------|-----------------------------------------------------------------|---------------|
|       |                            |      |                            |       | maximum distance exceeded, bad d_angle(sp2),<br>bad d_planarity |               |
| 1CTSA | <a href="#">CYS184(N)</a>  | 4.00 | <a href="#">MET216(CE)</a> | 1CTSA |                                                                 | N[ ] ... C[ ] |
| 1CTSA | <a href="#">CYS184(CA)</a> | 4.29 | <a href="#">MET216(SD)</a> | 1CTSA |                                                                 | C[ ] ... S[ ] |
| 1CTSA | <a href="#">CYS184(CA)</a> | 4.33 | <a href="#">MET216(CE)</a> | 1CTSA |                                                                 | C[ ] ... C[ ] |
| 1CTSA | <a href="#">CYS184(CB)</a> | 4.79 | <a href="#">MET216(SD)</a> | 1CTSA |                                                                 |               |
| 1CTSA | <a href="#">CYS184(CB)</a> | 4.94 | <a href="#">MET216(CE)</a> | 1CTSA |                                                                 |               |
| 1CTSA | <a href="#">CYS184(SG)</a> | 4.48 | <a href="#">MET216(SD)</a> | 1CTSA |                                                                 | S[ ] ... S[ ] |
| 1CTSA | <a href="#">CYS184(SG)</a> | 4.42 | <a href="#">MET216(CE)</a> | 1CTSA |                                                                 | S[ ] ... C[ ] |

| chain1 | res1/atm1                  | distance | res2/atm2                   | chain2 | H-bonding                                                                                                 | Charge interaction |
|--------|----------------------------|----------|-----------------------------|--------|-----------------------------------------------------------------------------------------------------------|--------------------|
| 3F8UA  | <a href="#">CYS244(N)</a>  | 4.70     | <a href="#">GLU216(OE1)</a> | 3F8UA  | [D-A-AA]:107.1° [A-D-DD]:128.1° d_planarity:-24.1°<br>a_planarity:-33.1°, maximum distance exceeded       |                    |
| 3F8UA  | <a href="#">CYS244(N)</a>  | 4.95     | <a href="#">GLU216(OE2)</a> | 3F8UA  | [D-A-AA]:95.0° [A-D-DD]:153.3° d_planarity:-37.2°<br>a_planarity:-29.9°, maximum distance exceeded        |                    |
| 3F8UA  | <a href="#">CYS244(N)</a>  | 4.79     | <a href="#">PHE241(C)</a>   | 3F8UA  |                                                                                                           |                    |
| 3F8UA  | <a href="#">CYS244(N)</a>  | 3.99     | <a href="#">PHE241(O)</a>   | 3F8UA  | [D-A-AA]:124.2° [A-D-DD]:105.1° d_planarity:-38.6°<br>a_planarity:53.3°, maximum distance exceeded        | N[ ] ... O[ ]      |
| 3F8UA  | <a href="#">CYS244(CA)</a> | 4.59     | <a href="#">PHE241(O)</a>   | 3F8UA  |                                                                                                           |                    |
| 3F8UA  | <a href="#">CYS244(C)</a>  | 4.09     | <a href="#">PHE241(O)</a>   | 3F8UA  |                                                                                                           | C[ ] ... O[ ]      |
| 3F8UA  | <a href="#">CYS244(O)</a>  | 4.66     | <a href="#">PHE241(O)</a>   | 3F8UA  |                                                                                                           |                    |
| 3F8UA  | <a href="#">CYS244(N)</a>  | 4.36     | <a href="#">GLY242(CA)</a>  | 3F8UA  |                                                                                                           | N[ ] ... C[ ]      |
| 3F8UA  | <a href="#">CYS244(N)</a>  | 3.25     | <a href="#">GLY242(C)</a>   | 3F8UA  |                                                                                                           | N[ ] ... C[ ]      |
| 3F8UA  | <a href="#">CYS244(N)</a>  | 3.34     | <a href="#">GLY242(O)</a>   | 3F8UA  | [D-A-AA]:75.0° [A-D-DD]:132.9° d_planarity:-89.5°<br>a_planarity:48.6°, bad a_angle(sp2), bad d_planarity | N[ ] ... O[ ]      |
| 3F8UA  | <a href="#">CYS244(CA)</a> | 4.57     | <a href="#">GLY242(C)</a>   | 3F8UA  |                                                                                                           |                    |
| 3F8UA  | <a href="#">CYS244(CA)</a> | 4.47     | <a href="#">GLY242(O)</a>   | 3F8UA  |                                                                                                           | C[ ] ... O[ ]      |
| 3F8UA  | <a href="#">CYS244(N)</a>  | 2.82     | <a href="#">ILE243(N)</a>   | 3F8UA  |                                                                                                           | N[ ] ... N[ ]      |
| 3F8UA  | <a href="#">CYS244(N)</a>  | 2.49     | <a href="#">ILE243(CA)</a>  | 3F8UA  |                                                                                                           | N[ ] ... C[ ]      |
| 3F8UA  | <a href="#">CYS244(N)</a>  | 2.25     | <a href="#">ILE243(O)</a>   | 3F8UA  | [D-A-AA]:30.5° [A-D-DD]:93.4° d_planarity:1.7°<br>a_planarity:3.2°, bad a_angle(sp2)                      | N[ ] ... O[ ]      |
| 3F8UA  | <a href="#">CYS244(N)</a>  | 3.51     | <a href="#">ILE243(CB)</a>  | 3F8UA  |                                                                                                           | N[ ] ... C[ ]      |
| 3F8UA  | <a href="#">CYS244(N)</a>  | 3.48     | <a href="#">ILE243(CG1)</a> | 3F8UA  |                                                                                                           | N[ ] ... C[ ]      |
| 3F8UA  | <a href="#">CYS244(N)</a>  | 4.80     | <a href="#">ILE243(CG2)</a> | 3F8UA  |                                                                                                           |                    |
| 3F8UA  | <a href="#">CYS244(N)</a>  | 4.83     | <a href="#">ILE243(CD1)</a> | 3F8UA  |                                                                                                           |                    |
| 3F8UA  | <a href="#">CYS244(CA)</a> | 4.28     | <a href="#">ILE243(N)</a>   | 3F8UA  |                                                                                                           | C[ ] ... N[ ]      |
| 3F8UA  | <a href="#">CYS244(CA)</a> | 3.86     | <a href="#">ILE243(CA)</a>  | 3F8UA  |                                                                                                           | C[ ] ... C[ ]      |
| 3F8UA  | <a href="#">CYS244(CA)</a> | 2.44     | <a href="#">ILE243(C)</a>   | 3F8UA  |                                                                                                           | C[ ] ... C[ ]      |
| 3F8UA  | <a href="#">CYS244(CA)</a> | 2.75     | <a href="#">ILE243(O)</a>   | 3F8UA  |                                                                                                           | C[ ] ... O[ ]      |
| 3F8UA  | <a href="#">CYS244(CA)</a> | 4.76     | <a href="#">ILE243(CB)</a>  | 3F8UA  |                                                                                                           |                    |
| 3F8UA  | <a href="#">CYS244(CA)</a> | 4.56     | <a href="#">ILE243(CG1)</a> | 3F8UA  |                                                                                                           |                    |
| 3F8UA  | <a href="#">CYS244(C)</a>  | 4.98     | <a href="#">ILE243(CA)</a>  | 3F8UA  |                                                                                                           |                    |
| 3F8UA  | <a href="#">CYS244(C)</a>  | 3.75     | <a href="#">ILE243(C)</a>   | 3F8UA  |                                                                                                           | C[ ] ... C[ ]      |
| 3F8UA  | <a href="#">CYS244(C)</a>  | 4.23     | <a href="#">ILE243(O)</a>   | 3F8UA  |                                                                                                           | C[ ] ... O[ ]      |
| 3F8UA  | <a href="#">CYS244(O)</a>  | 4.60     | <a href="#">ILE243(C)</a>   | 3F8UA  |                                                                                                           |                    |
| 3F8UA  | <a href="#">CYS244(CB)</a> | 4.49     | <a href="#">ILE243(CA)</a>  | 3F8UA  |                                                                                                           | C[ ] ... C[ ]      |
| 3F8UA  | <a href="#">CYS244(CB)</a> | 3.10     | <a href="#">ILE243(C)</a>   | 3F8UA  |                                                                                                           | C[ ] ... C[ ]      |
| 3F8UA  | <a href="#">CYS244(CB)</a> | 3.15     | <a href="#">ILE243(O)</a>   | 3F8UA  |                                                                                                           | C[ ] ... O[ ]      |

|       |                             |      |                              |       |                                                                                                    |               |
|-------|-----------------------------|------|------------------------------|-------|----------------------------------------------------------------------------------------------------|---------------|
| 3F8UA | <a href="#">CYS244</a> (CB) | 4.94 | <a href="#">ILE243</a> (CB)  | 3F8UA |                                                                                                    |               |
| 3F8UA | <a href="#">CYS244</a> (CB) | 4.39 | <a href="#">ILE243</a> (CG1) | 3F8UA |                                                                                                    | C[ ] ... C[ ] |
| 3F8UA | <a href="#">CYS244</a> (SG) | 4.78 | <a href="#">ILE243</a> (C)   | 3F8UA |                                                                                                    |               |
| 3F8UA | <a href="#">CYS244</a> (SG) | 4.52 | <a href="#">ILE243</a> (O)   | 3F8UA |                                                                                                    |               |
| 3F8UA | <a href="#">CYS244</a> (N)  | 3.21 | <a href="#">PRO245</a> (N)   | 3F8UA |                                                                                                    | N[ ] ... N[ ] |
| 3F8UA | <a href="#">CYS244</a> (N)  | 4.55 | <a href="#">PRO245</a> (CA)  | 3F8UA |                                                                                                    |               |
| 3F8UA | <a href="#">CYS244</a> (N)  | 4.88 | <a href="#">PRO245</a> (CG)  | 3F8UA |                                                                                                    |               |
| 3F8UA | <a href="#">CYS244</a> (N)  | 3.38 | <a href="#">PRO245</a> (CD)  | 3F8UA |                                                                                                    | N[ ] ... C[ ] |
| 3F8UA | <a href="#">CYS244</a> (CA) | 2.45 | <a href="#">PRO245</a> (N)   | 3F8UA |                                                                                                    | C[ ] ... N[ ] |
| 3F8UA | <a href="#">CYS244</a> (CA) | 3.82 | <a href="#">PRO245</a> (CA)  | 3F8UA |                                                                                                    | C[ ] ... C[ ] |
| 3F8UA | <a href="#">CYS244</a> (CA) | 4.54 | <a href="#">PRO245</a> (C)   | 3F8UA |                                                                                                    |               |
| 3F8UA | <a href="#">CYS244</a> (CA) | 4.33 | <a href="#">PRO245</a> (O)   | 3F8UA |                                                                                                    | C[ ] ... O[ ] |
| 3F8UA | <a href="#">CYS244</a> (CA) | 4.73 | <a href="#">PRO245</a> (CB)  | 3F8UA |                                                                                                    |               |
| 3F8UA | <a href="#">CYS244</a> (CA) | 4.34 | <a href="#">PRO245</a> (CG)  | 3F8UA |                                                                                                    | C[ ] ... C[ ] |
| 3F8UA | <a href="#">CYS244</a> (CA) | 2.95 | <a href="#">PRO245</a> (CD)  | 3F8UA |                                                                                                    | C[ ] ... C[ ] |
| 3F8UA | <a href="#">CYS244</a> (C)  | 2.45 | <a href="#">PRO245</a> (CA)  | 3F8UA |                                                                                                    | C[ ] ... C[ ] |
| 3F8UA | <a href="#">CYS244</a> (C)  | 3.16 | <a href="#">PRO245</a> (C)   | 3F8UA |                                                                                                    | C[ ] ... C[ ] |
| 3F8UA | <a href="#">CYS244</a> (C)  | 3.21 | <a href="#">PRO245</a> (O)   | 3F8UA |                                                                                                    | C[ ] ... O[ ] |
| 3F8UA | <a href="#">CYS244</a> (C)  | 3.61 | <a href="#">PRO245</a> (CB)  | 3F8UA |                                                                                                    | C[ ] ... C[ ] |
| 3F8UA | <a href="#">CYS244</a> (C)  | 3.62 | <a href="#">PRO245</a> (CG)  | 3F8UA |                                                                                                    | C[ ] ... C[ ] |
| 3F8UA | <a href="#">CYS244</a> (C)  | 2.52 | <a href="#">PRO245</a> (CD)  | 3F8UA |                                                                                                    | C[ ] ... C[ ] |
| 3F8UA | <a href="#">CYS244</a> (O)  | 2.25 | <a href="#">PRO245</a> (N)   | 3F8UA |                                                                                                    | O[ ] ... N[ ] |
| 3F8UA | <a href="#">CYS244</a> (O)  | 2.76 | <a href="#">PRO245</a> (CA)  | 3F8UA |                                                                                                    | O[ ] ... C[ ] |
| 3F8UA | <a href="#">CYS244</a> (O)  | 3.17 | <a href="#">PRO245</a> (C)   | 3F8UA |                                                                                                    | O[ ] ... C[ ] |
| 3F8UA | <a href="#">CYS244</a> (O)  | 3.31 | <a href="#">PRO245</a> (O)   | 3F8UA |                                                                                                    | O[ ] ... O[ ] |
| 3F8UA | <a href="#">CYS244</a> (O)  | 4.18 | <a href="#">PRO245</a> (CB)  | 3F8UA |                                                                                                    | O[ ] ... C[ ] |
| 3F8UA | <a href="#">CYS244</a> (O)  | 4.52 | <a href="#">PRO245</a> (CG)  | 3F8UA |                                                                                                    |               |
| 3F8UA | <a href="#">CYS244</a> (O)  | 3.64 | <a href="#">PRO245</a> (CD)  | 3F8UA |                                                                                                    | O[ ] ... C[ ] |
| 3F8UA | <a href="#">CYS244</a> (CB) | 3.68 | <a href="#">PRO245</a> (N)   | 3F8UA |                                                                                                    | C[ ] ... N[ ] |
| 3F8UA | <a href="#">CYS244</a> (CB) | 4.89 | <a href="#">PRO245</a> (CA)  | 3F8UA |                                                                                                    |               |
| 3F8UA | <a href="#">CYS244</a> (CB) | 4.88 | <a href="#">PRO245</a> (O)   | 3F8UA |                                                                                                    |               |
| 3F8UA | <a href="#">CYS244</a> (CB) | 4.39 | <a href="#">PRO245</a> (CD)  | 3F8UA |                                                                                                    | C[ ] ... C[ ] |
| 3F8UA | <a href="#">CYS244</a> (SG) | 4.25 | <a href="#">PRO245</a> (N)   | 3F8UA |                                                                                                    | S[ ] ... N[ ] |
| 3F8UA | <a href="#">CYS244</a> (SG) | 4.30 | <a href="#">PRO245</a> (O)   | 3F8UA |                                                                                                    | S[ ] ... O[ ] |
| 3F8UA | <a href="#">CYS244</a> (C)  | 4.30 | <a href="#">HIS246</a> (N)   | 3F8UA |                                                                                                    | C[ ] ... N[ ] |
| 3F8UA | <a href="#">CYS244</a> (O)  | 4.06 | <a href="#">HIS246</a> (N)   | 3F8UA | [D-A-AA]:92.7° [A-D-DD]:128.4° d_planarity:50.2°<br>a_planarity:19.2°, maximum distance exceeded   | O[ ] ... N[ ] |
| 3F8UA | <a href="#">CYS244</a> (N)  | 4.98 | <a href="#">ARG280</a> (NH2) | 3F8UA |                                                                                                    |               |
| 3F8UA | <a href="#">CYS244</a> (CA) | 4.89 | <a href="#">ARG280</a> (NE)  | 3F8UA |                                                                                                    |               |
| 3F8UA | <a href="#">CYS244</a> (CA) | 4.85 | <a href="#">ARG280</a> (NH2) | 3F8UA |                                                                                                    |               |
| 3F8UA | <a href="#">CYS244</a> (C)  | 3.98 | <a href="#">ARG280</a> (NE)  | 3F8UA |                                                                                                    | C[ ] ... N[ ] |
| 3F8UA | <a href="#">CYS244</a> (C)  | 4.48 | <a href="#">ARG280</a> (CZ)  | 3F8UA |                                                                                                    | C[ ] ... C[ ] |
| 3F8UA | <a href="#">CYS244</a> (C)  | 4.02 | <a href="#">ARG280</a> (NH2) | 3F8UA |                                                                                                    | C[ ] ... N[+] |
| 3F8UA | <a href="#">CYS244</a> (O)  | 4.51 | <a href="#">ARG280</a> (CG)  | 3F8UA |                                                                                                    |               |
| 3F8UA | <a href="#">CYS244</a> (O)  | 3.87 | <a href="#">ARG280</a> (CD)  | 3F8UA |                                                                                                    | O[ ] ... C[ ] |
| 3F8UA | <a href="#">CYS244</a> (O)  | 2.74 | <a href="#">ARG280</a> (NE)  | 3F8UA | <b>H-bond</b> [D-A-AA]:176.2° [A-D-DD]:103.6° d_planarity:-<br>10.4° a_planarity:-0.4°             | O[ ] ... N[ ] |
| 3F8UA | <a href="#">CYS244</a> (O)  | 3.32 | <a href="#">ARG280</a> (CZ)  | 3F8UA |                                                                                                    | O[ ] ... C[ ] |
| 3F8UA | <a href="#">CYS244</a> (O)  | 4.63 | <a href="#">ARG280</a> (NH1) | 3F8UA | [D-A-AA]:157.6° [A-D-DD]:7.5° d_planarity:-50.9°<br>a_planarity:-70.5°, maximum distance exceeded, |               |



|       |                            |      |                             |       |                                                                                                                        |               |
|-------|----------------------------|------|-----------------------------|-------|------------------------------------------------------------------------------------------------------------------------|---------------|
|       |                            |      |                             |       | bad d_angle(sp2)                                                                                                       |               |
| 3F8UA | <a href="#">CYS244(O)</a>  | 3.07 | <a href="#">ARG280(NH2)</a> | 3F8UA | [D-A-AA]:133.6° [A-D-DD]:89.0° d_planarity:-8.7°<br>a_planarity:-87.6°, bad d_angle(sp2)                               | O[ ] ... N[+] |
| 3F8UA | <a href="#">CYS244(CB)</a> | 4.52 | <a href="#">ARG280(NE)</a>  | 3F8UA |                                                                                                                        |               |
| 3F8UA | <a href="#">CYS244(CB)</a> | 4.90 | <a href="#">ARG280(NH2)</a> | 3F8UA |                                                                                                                        |               |
| 3F8UA | <a href="#">CYS244(SG)</a> | 4.54 | <a href="#">ARG280(CG)</a>  | 3F8UA |                                                                                                                        |               |
| 3F8UA | <a href="#">CYS244(SG)</a> | 4.83 | <a href="#">ARG280(CD)</a>  | 3F8UA | Positive                                                                                                               |               |
| 3F8UA | <a href="#">CYS244(SG)</a> | 4.56 | <a href="#">ARG280(NE)</a>  | 3F8UA | [D-A-AA]:77.1° [A-D-DD]:129.7° d_planarity:-52.4°,<br>maximum distance exceeded                                        |               |
| 3F8UA | <a href="#">CYS244(SG)</a> | 4.73 | <a href="#">VAL283(CB)</a>  | 3F8UA |                                                                                                                        |               |
| 3F8UA | <a href="#">CYS244(SG)</a> | 4.13 | <a href="#">VAL283(CG1)</a> | 3F8UA |                                                                                                                        | S[ ] ... C[ ] |
| 3F8UA | <a href="#">CYS244(N)</a>  | 4.93 | <a href="#">MET284(CG)</a>  | 3F8UA |                                                                                                                        |               |
| 3F8UA | <a href="#">CYS244(N)</a>  | 3.98 | <a href="#">MET284(CE)</a>  | 3F8UA |                                                                                                                        | N[ ] ... C[ ] |
| 3F8UA | <a href="#">CYS244(CA)</a> | 4.74 | <a href="#">MET284(CG)</a>  | 3F8UA |                                                                                                                        |               |
| 3F8UA | <a href="#">CYS244(CA)</a> | 4.39 | <a href="#">MET284(CE)</a>  | 3F8UA |                                                                                                                        | C[ ] ... C[ ] |
| 3F8UA | <a href="#">CYS244(C)</a>  | 4.67 | <a href="#">MET284(CE)</a>  | 3F8UA |                                                                                                                        |               |
| 3F8UA | <a href="#">CYS244(O)</a>  | 4.85 | <a href="#">MET284(CG)</a>  | 3F8UA |                                                                                                                        |               |
| 3F8UA | <a href="#">CYS244(O)</a>  | 4.58 | <a href="#">MET284(SD)</a>  | 3F8UA |                                                                                                                        |               |
| 3F8UA | <a href="#">CYS244(O)</a>  | 4.23 | <a href="#">MET284(CE)</a>  | 3F8UA |                                                                                                                        | O[ ] ... C[ ] |
| 3F8UA | <a href="#">CYS244(CB)</a> | 4.96 | <a href="#">MET284(CA)</a>  | 3F8UA |                                                                                                                        |               |
| 3F8UA | <a href="#">CYS244(CB)</a> | 4.65 | <a href="#">MET284(CB)</a>  | 3F8UA |                                                                                                                        |               |
| 3F8UA | <a href="#">CYS244(CB)</a> | 3.45 | <a href="#">MET284(CG)</a>  | 3F8UA |                                                                                                                        | C[ ] ... C[ ] |
| 3F8UA | <a href="#">CYS244(CB)</a> | 4.22 | <a href="#">MET284(SD)</a>  | 3F8UA |                                                                                                                        | C[ ] ... S[ ] |
| 3F8UA | <a href="#">CYS244(CB)</a> | 3.93 | <a href="#">MET284(CE)</a>  | 3F8UA |                                                                                                                        | C[ ] ... C[ ] |
| 3F8UA | <a href="#">CYS244(SG)</a> | 4.11 | <a href="#">MET284(CG)</a>  | 3F8UA |                                                                                                                        | S[ ] ... C[ ] |
| 3F8UA | <a href="#">CYS244(N)</a>  | 4.45 | <a href="#">PHE299(O)</a>   | 3F8UA | [D-A-AA]:113.2° [A-D-DD]:47.5° d_planarity:51.4°<br>a_planarity:-79.2°, maximum distance exceeded,<br>bad d_angle(sp2) | N[ ] ... O[ ] |
| 3F8UA | <a href="#">CYS244(N)</a>  | 4.99 | <a href="#">PHE299(CB)</a>  | 3F8UA |                                                                                                                        |               |
| 3F8UA | <a href="#">CYS244(CA)</a> | 4.83 | <a href="#">PHE299(CA)</a>  | 3F8UA |                                                                                                                        |               |
| 3F8UA | <a href="#">CYS244(CA)</a> | 4.11 | <a href="#">PHE299(C)</a>   | 3F8UA |                                                                                                                        | C[ ] ... C[ ] |
| 3F8UA | <a href="#">CYS244(CA)</a> | 3.62 | <a href="#">PHE299(O)</a>   | 3F8UA |                                                                                                                        | C[ ] ... O[ ] |
| 3F8UA | <a href="#">CYS244(CA)</a> | 4.39 | <a href="#">PHE299(CB)</a>  | 3F8UA |                                                                                                                        | C[ ] ... C[ ] |
| 3F8UA | <a href="#">CYS244(C)</a>  | 4.75 | <a href="#">PHE299(C)</a>   | 3F8UA |                                                                                                                        |               |
| 3F8UA | <a href="#">CYS244(C)</a>  | 4.13 | <a href="#">PHE299(O)</a>   | 3F8UA |                                                                                                                        | C[ ] ... O[ ] |
| 3F8UA | <a href="#">CYS244(CB)</a> | 4.97 | <a href="#">PHE299(CA)</a>  | 3F8UA |                                                                                                                        |               |
| 3F8UA | <a href="#">CYS244(CB)</a> | 4.45 | <a href="#">PHE299(C)</a>   | 3F8UA |                                                                                                                        | C[ ] ... C[ ] |
| 3F8UA | <a href="#">CYS244(CB)</a> | 4.38 | <a href="#">PHE299(O)</a>   | 3F8UA |                                                                                                                        | C[ ] ... O[ ] |
| 3F8UA | <a href="#">CYS244(CB)</a> | 4.14 | <a href="#">PHE299(CB)</a>  | 3F8UA |                                                                                                                        | C[ ] ... C[ ] |
| 3F8UA | <a href="#">CYS244(SG)</a> | 4.75 | <a href="#">PHE299(CA)</a>  | 3F8UA |                                                                                                                        |               |
| 3F8UA | <a href="#">CYS244(SG)</a> | 4.07 | <a href="#">PHE299(C)</a>   | 3F8UA |                                                                                                                        | S[ ] ... C[ ] |
| 3F8UA | <a href="#">CYS244(SG)</a> | 4.36 | <a href="#">PHE299(O)</a>   | 3F8UA |                                                                                                                        | S[ ] ... O[ ] |
| 3F8UA | <a href="#">CYS244(SG)</a> | 4.06 | <a href="#">PHE299(CB)</a>  | 3F8UA |                                                                                                                        | S[ ] ... C[ ] |
| 3F8UA | <a href="#">CYS244(CA)</a> | 4.59 | <a href="#">ALA300(N)</a>   | 3F8UA |                                                                                                                        |               |
| 3F8UA | <a href="#">CYS244(CA)</a> | 4.61 | <a href="#">ALA300(CA)</a>  | 3F8UA |                                                                                                                        |               |
| 3F8UA | <a href="#">CYS244(C)</a>  | 4.97 | <a href="#">ALA300(N)</a>   | 3F8UA |                                                                                                                        |               |
| 3F8UA | <a href="#">CYS244(C)</a>  | 4.53 | <a href="#">ALA300(CA)</a>  | 3F8UA |                                                                                                                        |               |
| 3F8UA | <a href="#">CYS244(CB)</a> | 4.67 | <a href="#">ALA300(N)</a>   | 3F8UA |                                                                                                                        |               |
| 3F8UA | <a href="#">CYS244(CB)</a> | 4.81 | <a href="#">ALA300(CA)</a>  | 3F8UA |                                                                                                                        |               |
| 3F8UA | <a href="#">CYS244(SG)</a> | 3.75 | <a href="#">ALA300(N)</a>   | 3F8UA | [D-A-AA]:108.1° [A-D-DD]:78.6° d_planarity:88.1°                                                                       | S[ ] ... N[ ] |

|       |                            |      |                             |       |                                                                                                   |               |
|-------|----------------------------|------|-----------------------------|-------|---------------------------------------------------------------------------------------------------|---------------|
|       |                            |      |                             |       | bad d_angle(sp2), bad d_planarity                                                                 |               |
| 3F8UA | <a href="#">CYS244(SG)</a> | 3.75 | <a href="#">ALA300(CA)</a>  | 3F8UA |                                                                                                   | S[ ] ... C[ ] |
| 3F8UA | <a href="#">CYS244(SG)</a> | 3.94 | <a href="#">ALA300(C)</a>   | 3F8UA |                                                                                                   | S[ ] ... C[ ] |
| 3F8UA | <a href="#">CYS244(SG)</a> | 4.53 | <a href="#">ALA300(O)</a>   | 3F8UA |                                                                                                   |               |
| 3F8UA | <a href="#">CYS244(SG)</a> | 4.03 | <a href="#">VAL301(N)</a>   | 3F8UA | [D-A-AA]:138.5° [A-D-DD]:120.2° d_planarity:-88.1°,<br>maximum distance exceeded, bad d_planarity | S[ ] ... N[ ] |
| 3F8UA | <a href="#">CYS244(SG)</a> | 4.92 | <a href="#">VAL301(CA)</a>  | 3F8UA |                                                                                                   |               |
| 3F8UA | <a href="#">CYS244(SG)</a> | 4.77 | <a href="#">VAL301(CB)</a>  | 3F8UA |                                                                                                   |               |
| 3F8UA | <a href="#">CYS244(SG)</a> | 3.75 | <a href="#">VAL301(CG1)</a> | 3F8UA |                                                                                                   | S[ ] ... C[ ] |

| chain1 | res1/atm1                  | distance | res2/atm2                  | chain2 | H-bonding                                                                                           | Charge interaction |
|--------|----------------------------|----------|----------------------------|--------|-----------------------------------------------------------------------------------------------------|--------------------|
| 3CF1A  | <a href="#">CYS105(N)</a>  | 4.13     | <a href="#">ASP55(OD1)</a> | 3CF1A  | [D-A-AA]:140.9° [A-D-DD]:138.1° d_planarity:-30.3°<br>a_planarity:-25.3°, maximum distance exceeded | N[ ] ... O[-]      |
| 3CF1A  | <a href="#">CYS105(N)</a>  | 4.43     | <a href="#">THR56(C)</a>   | 3CF1A  |                                                                                                     | N[ ] ... C[ ]      |
| 3CF1A  | <a href="#">CYS105(N)</a>  | 3.36     | <a href="#">THR56(O)</a>   | 3CF1A  | <b>H-bond</b> [D-A-AA]:145.6° [A-D-DD]:115.9° d_planarity:-13.0° a_planarity:53.5°                  | N[ ] ... O[ ]      |
| 3CF1A  | <a href="#">CYS105(N)</a>  | 4.97     | <a href="#">THR56(OG1)</a> | 3CF1A  | [D-A-AA]:121.5° [A-D-DD]:79.3° d_planarity:-3.3°,<br>maximum distance exceeded, bad d_angle(sp2)    |                    |
| 3CF1A  | <a href="#">CYS105(CA)</a> | 4.20     | <a href="#">THR56(O)</a>   | 3CF1A  |                                                                                                     | C[ ] ... O[ ]      |
| 3CF1A  | <a href="#">CYS105(CA)</a> | 4.91     | <a href="#">THR56(OG1)</a> | 3CF1A  |                                                                                                     |                    |
| 3CF1A  | <a href="#">CYS105(C)</a>  | 4.19     | <a href="#">THR56(O)</a>   | 3CF1A  |                                                                                                     | C[ ] ... O[ ]      |
| 3CF1A  | <a href="#">CYS105(C)</a>  | 4.04     | <a href="#">THR56(OG1)</a> | 3CF1A  |                                                                                                     | C[ ] ... O[ ]      |
| 3CF1A  | <a href="#">CYS105(O)</a>  | 4.90     | <a href="#">THR56(C)</a>   | 3CF1A  |                                                                                                     |                    |
| 3CF1A  | <a href="#">CYS105(O)</a>  | 4.30     | <a href="#">THR56(O)</a>   | 3CF1A  |                                                                                                     | O[ ] ... O[ ]      |
| 3CF1A  | <a href="#">CYS105(O)</a>  | 4.66     | <a href="#">THR56(CB)</a>  | 3CF1A  |                                                                                                     |                    |
| 3CF1A  | <a href="#">CYS105(O)</a>  | 3.34     | <a href="#">THR56(OG1)</a> | 3CF1A  | [D-A-AA]:116.5° [A-D-DD]:153.4° a_planarity:81.0°,<br>maximum distance exceeded                     | O[ ] ... O[ ]      |
| 3CF1A  | <a href="#">CYS105(CB)</a> | 4.50     | <a href="#">THR56(O)</a>   | 3CF1A  |                                                                                                     |                    |
| 3CF1A  | <a href="#">CYS105(N)</a>  | 4.96     | <a href="#">VAL57(N)</a>   | 3CF1A  |                                                                                                     |                    |
| 3CF1A  | <a href="#">CYS105(N)</a>  | 4.55     | <a href="#">VAL57(CA)</a>  | 3CF1A  |                                                                                                     |                    |
| 3CF1A  | <a href="#">CYS105(N)</a>  | 4.97     | <a href="#">VAL57(C)</a>   | 3CF1A  |                                                                                                     |                    |
| 3CF1A  | <a href="#">CYS105(CB)</a> | 4.97     | <a href="#">VAL57(CA)</a>  | 3CF1A  |                                                                                                     |                    |
| 3CF1A  | <a href="#">CYS105(CB)</a> | 4.69     | <a href="#">VAL57(C)</a>   | 3CF1A  |                                                                                                     |                    |
| 3CF1A  | <a href="#">CYS105(N)</a>  | 4.76     | <a href="#">LEU58(N)</a>   | 3CF1A  |                                                                                                     |                    |
| 3CF1A  | <a href="#">CYS105(CB)</a> | 4.40     | <a href="#">LEU58(N)</a>   | 3CF1A  |                                                                                                     | C[ ] ... N[ ]      |
| 3CF1A  | <a href="#">CYS105(CB)</a> | 4.76     | <a href="#">LEU58(CA)</a>  | 3CF1A  |                                                                                                     |                    |
| 3CF1A  | <a href="#">CYS105(CB)</a> | 4.02     | <a href="#">LEU58(CB)</a>  | 3CF1A  |                                                                                                     | C[ ] ... C[ ]      |
| 3CF1A  | <a href="#">CYS105(CB)</a> | 4.98     | <a href="#">LEU58(CG)</a>  | 3CF1A  |                                                                                                     |                    |
| 3CF1A  | <a href="#">CYS105(CB)</a> | 4.89     | <a href="#">LEU58(CD2)</a> | 3CF1A  |                                                                                                     |                    |
| 3CF1A  | <a href="#">CYS105(SG)</a> | 4.61     | <a href="#">LEU58(CB)</a>  | 3CF1A  |                                                                                                     |                    |
| 3CF1A  | <a href="#">CYS105(SG)</a> | 4.63     | <a href="#">LEU58(CD2)</a> | 3CF1A  |                                                                                                     |                    |
| 3CF1A  | <a href="#">CYS105(N)</a>  | 3.84     | <a href="#">GLN103(C)</a>  | 3CF1A  |                                                                                                     | N[ ] ... C[ ]      |
| 3CF1A  | <a href="#">CYS105(N)</a>  | 3.40     | <a href="#">GLN103(O)</a>  | 3CF1A  | [D-A-AA]:101.7° [A-D-DD]:123.1° d_planarity:72.7°<br>a_planarity:23.3°, bad d_planarity             | N[ ] ... O[ ]      |
| 3CF1A  | <a href="#">CYS105(CA)</a> | 4.91     | <a href="#">GLN103(C)</a>  | 3CF1A  |                                                                                                     |                    |
| 3CF1A  | <a href="#">CYS105(CA)</a> | 4.36     | <a href="#">GLN103(O)</a>  | 3CF1A  |                                                                                                     | C[ ] ... O[ ]      |
| 3CF1A  | <a href="#">CYS105(CB)</a> | 4.91     | <a href="#">GLN103(C)</a>  | 3CF1A  |                                                                                                     |                    |
| 3CF1A  | <a href="#">CYS105(CB)</a> | 4.13     | <a href="#">GLN103(O)</a>  | 3CF1A  |                                                                                                     | C[ ] ... O[ ]      |

|       |                            |      |                            |       |                                                                                      |               |
|-------|----------------------------|------|----------------------------|-------|--------------------------------------------------------------------------------------|---------------|
| 3CF1A | <a href="#">CYS105(N)</a>  | 3.51 | <a href="#">PRO104(N)</a>  | 3CF1A |                                                                                      | N[ ] ... N[ ] |
| 3CF1A | <a href="#">CYS105(N)</a>  | 2.42 | <a href="#">PRO104(CA)</a> | 3CF1A |                                                                                      | N[ ] ... C[ ] |
| 3CF1A | <a href="#">CYS105(N)</a>  | 2.24 | <a href="#">PRO104(O)</a>  | 3CF1A | [D-A-AA]:29.8° [A-D-DD]:92.9° d_planarity:0.0°<br>a_planarity:0.5°, bad a_angle(sp2) | N[ ] ... O[ ] |
| 3CF1A | <a href="#">CYS105(N)</a>  | 3.45 | <a href="#">PRO104(CB)</a> | 3CF1A |                                                                                      | N[ ] ... C[ ] |
| 3CF1A | <a href="#">CYS105(N)</a>  | 4.28 | <a href="#">PRO104(CG)</a> | 3CF1A |                                                                                      | N[ ] ... C[ ] |
| 3CF1A | <a href="#">CYS105(N)</a>  | 4.60 | <a href="#">PRO104(CD)</a> | 3CF1A |                                                                                      |               |
| 3CF1A | <a href="#">CYS105(CA)</a> | 4.72 | <a href="#">PRO104(N)</a>  | 3CF1A |                                                                                      |               |
| 3CF1A | <a href="#">CYS105(CA)</a> | 3.78 | <a href="#">PRO104(CA)</a> | 3CF1A |                                                                                      | C[ ] ... C[ ] |
| 3CF1A | <a href="#">CYS105(CA)</a> | 2.41 | <a href="#">PRO104(C)</a>  | 3CF1A |                                                                                      | C[ ] ... C[ ] |
| 3CF1A | <a href="#">CYS105(CA)</a> | 2.73 | <a href="#">PRO104(O)</a>  | 3CF1A |                                                                                      | C[ ] ... O[ ] |
| 3CF1A | <a href="#">CYS105(CA)</a> | 4.71 | <a href="#">PRO104(CB)</a> | 3CF1A |                                                                                      |               |
| 3CF1A | <a href="#">CYS105(C)</a>  | 4.80 | <a href="#">PRO104(CA)</a> | 3CF1A |                                                                                      |               |
| 3CF1A | <a href="#">CYS105(C)</a>  | 3.62 | <a href="#">PRO104(C)</a>  | 3CF1A |                                                                                      | C[ ] ... C[ ] |
| 3CF1A | <a href="#">CYS105(C)</a>  | 4.08 | <a href="#">PRO104(O)</a>  | 3CF1A |                                                                                      | C[ ] ... O[ ] |
| 3CF1A | <a href="#">CYS105(O)</a>  | 4.61 | <a href="#">PRO104(C)</a>  | 3CF1A |                                                                                      |               |
| 3CF1A | <a href="#">CYS105(CB)</a> | 4.53 | <a href="#">PRO104(CA)</a> | 3CF1A |                                                                                      |               |
| 3CF1A | <a href="#">CYS105(CB)</a> | 3.25 | <a href="#">PRO104(C)</a>  | 3CF1A |                                                                                      | C[ ] ... C[ ] |
| 3CF1A | <a href="#">CYS105(CB)</a> | 3.45 | <a href="#">PRO104(O)</a>  | 3CF1A |                                                                                      | C[ ] ... O[ ] |
| 3CF1A | <a href="#">CYS105(SG)</a> | 4.78 | <a href="#">PRO104(C)</a>  | 3CF1A |                                                                                      |               |
| 3CF1A | <a href="#">CYS105(SG)</a> | 4.64 | <a href="#">PRO104(O)</a>  | 3CF1A |                                                                                      |               |
| 3CF1A | <a href="#">CYS105(N)</a>  | 3.01 | <a href="#">PRO106(N)</a>  | 3CF1A |                                                                                      | N[ ] ... N[ ] |
| 3CF1A | <a href="#">CYS105(N)</a>  | 4.38 | <a href="#">PRO106(CA)</a> | 3CF1A |                                                                                      | N[ ] ... C[ ] |
| 3CF1A | <a href="#">CYS105(N)</a>  | 4.92 | <a href="#">PRO106(CB)</a> | 3CF1A |                                                                                      |               |
| 3CF1A | <a href="#">CYS105(N)</a>  | 4.49 | <a href="#">PRO106(CG)</a> | 3CF1A |                                                                                      | N[ ] ... C[ ] |
| 3CF1A | <a href="#">CYS105(N)</a>  | 2.99 | <a href="#">PRO106(CD)</a> | 3CF1A |                                                                                      | N[ ] ... C[ ] |
| 3CF1A | <a href="#">CYS105(CA)</a> | 2.46 | <a href="#">PRO106(N)</a>  | 3CF1A |                                                                                      | C[ ] ... N[ ] |
| 3CF1A | <a href="#">CYS105(CA)</a> | 3.85 | <a href="#">PRO106(CA)</a> | 3CF1A |                                                                                      | C[ ] ... C[ ] |
| 3CF1A | <a href="#">CYS105(CA)</a> | 4.64 | <a href="#">PRO106(C)</a>  | 3CF1A |                                                                                      |               |
| 3CF1A | <a href="#">CYS105(CA)</a> | 4.74 | <a href="#">PRO106(CB)</a> | 3CF1A |                                                                                      |               |
| 3CF1A | <a href="#">CYS105(CA)</a> | 4.37 | <a href="#">PRO106(CG)</a> | 3CF1A |                                                                                      | C[ ] ... C[ ] |
| 3CF1A | <a href="#">CYS105(CA)</a> | 2.93 | <a href="#">PRO106(CD)</a> | 3CF1A |                                                                                      | C[ ] ... C[ ] |
| 3CF1A | <a href="#">CYS105(C)</a>  | 2.47 | <a href="#">PRO106(CA)</a> | 3CF1A |                                                                                      | C[ ] ... C[ ] |
| 3CF1A | <a href="#">CYS105(C)</a>  | 3.28 | <a href="#">PRO106(C)</a>  | 3CF1A |                                                                                      | C[ ] ... C[ ] |
| 3CF1A | <a href="#">CYS105(C)</a>  | 4.48 | <a href="#">PRO106(O)</a>  | 3CF1A |                                                                                      | C[ ] ... O[ ] |
| 3CF1A | <a href="#">CYS105(C)</a>  | 3.62 | <a href="#">PRO106(CB)</a> | 3CF1A |                                                                                      | C[ ] ... C[ ] |
| 3CF1A | <a href="#">CYS105(C)</a>  | 3.65 | <a href="#">PRO106(CG)</a> | 3CF1A |                                                                                      | C[ ] ... C[ ] |
| 3CF1A | <a href="#">CYS105(C)</a>  | 2.52 | <a href="#">PRO106(CD)</a> | 3CF1A |                                                                                      | C[ ] ... C[ ] |
| 3CF1A | <a href="#">CYS105(O)</a>  | 2.26 | <a href="#">PRO106(N)</a>  | 3CF1A |                                                                                      | O[ ] ... N[ ] |
| 3CF1A | <a href="#">CYS105(O)</a>  | 2.80 | <a href="#">PRO106(CA)</a> | 3CF1A |                                                                                      | O[ ] ... C[ ] |
| 3CF1A | <a href="#">CYS105(O)</a>  | 3.33 | <a href="#">PRO106(C)</a>  | 3CF1A |                                                                                      | O[ ] ... C[ ] |
| 3CF1A | <a href="#">CYS105(O)</a>  | 4.54 | <a href="#">PRO106(O)</a>  | 3CF1A |                                                                                      |               |
| 3CF1A | <a href="#">CYS105(O)</a>  | 4.20 | <a href="#">PRO106(CB)</a> | 3CF1A |                                                                                      | O[ ] ... C[ ] |
| 3CF1A | <a href="#">CYS105(O)</a>  | 4.56 | <a href="#">PRO106(CG)</a> | 3CF1A |                                                                                      |               |
| 3CF1A | <a href="#">CYS105(O)</a>  | 3.63 | <a href="#">PRO106(CD)</a> | 3CF1A |                                                                                      | O[ ] ... C[ ] |
| 3CF1A | <a href="#">CYS105(CB)</a> | 3.75 | <a href="#">PRO106(N)</a>  | 3CF1A |                                                                                      | C[ ] ... N[ ] |
| 3CF1A | <a href="#">CYS105(CB)</a> | 4.98 | <a href="#">PRO106(CA)</a> | 3CF1A |                                                                                      |               |
| 3CF1A | <a href="#">CYS105(CB)</a> | 4.44 | <a href="#">PRO106(CD)</a> | 3CF1A |                                                                                      | C[ ] ... C[ ] |
| 3CF1A | <a href="#">CYS105(SG)</a> | 4.52 | <a href="#">PRO106(N)</a>  | 3CF1A |                                                                                      |               |

|       |                            |      |                             |       |                                                                                                                               |               |
|-------|----------------------------|------|-----------------------------|-------|-------------------------------------------------------------------------------------------------------------------------------|---------------|
| 3CF1A | <a href="#">CYS105(CA)</a> | 4.35 | <a href="#">ASP107(N)</a>   | 3CF1A |                                                                                                                               | C[ ] ... N[ ] |
| 3CF1A | <a href="#">CYS105(CA)</a> | 3.95 | <a href="#">ASP107(OD1)</a> | 3CF1A |                                                                                                                               | C[ ] ... O[-] |
| 3CF1A | <a href="#">CYS105(C)</a>  | 3.11 | <a href="#">ASP107(N)</a>   | 3CF1A |                                                                                                                               | C[ ] ... N[ ] |
| 3CF1A | <a href="#">CYS105(C)</a>  | 4.46 | <a href="#">ASP107(CA)</a>  | 3CF1A |                                                                                                                               | C[ ] ... C[ ] |
| 3CF1A | <a href="#">CYS105(C)</a>  | 4.92 | <a href="#">ASP107(CB)</a>  | 3CF1A |                                                                                                                               |               |
| 3CF1A | <a href="#">CYS105(C)</a>  | 4.69 | <a href="#">ASP107(CG)</a>  | 3CF1A |                                                                                                                               |               |
| 3CF1A | <a href="#">CYS105(C)</a>  | 3.69 | <a href="#">ASP107(OD1)</a> | 3CF1A |                                                                                                                               | C[ ] ... O[-] |
| 3CF1A | <a href="#">CYS105(O)</a>  | 2.95 | <a href="#">ASP107(N)</a>   | 3CF1A | [D-A-AA]:85.5° [A-D-DD]:140.6° d_planarity:-24.9°<br>a_planarity:46.4°, <b>bad a_angle(sp2)</b>                               | O[ ] ... N[ ] |
| 3CF1A | <a href="#">CYS105(O)</a>  | 4.19 | <a href="#">ASP107(CA)</a>  | 3CF1A |                                                                                                                               | O[ ] ... C[ ] |
| 3CF1A | <a href="#">CYS105(O)</a>  | 4.41 | <a href="#">ASP107(C)</a>   | 3CF1A |                                                                                                                               | O[ ] ... C[ ] |
| 3CF1A | <a href="#">CYS105(O)</a>  | 4.88 | <a href="#">ASP107(CB)</a>  | 3CF1A |                                                                                                                               |               |
| 3CF1A | <a href="#">CYS105(O)</a>  | 4.60 | <a href="#">ASP107(CG)</a>  | 3CF1A |                                                                                                                               |               |
| 3CF1A | <a href="#">CYS105(O)</a>  | 3.71 | <a href="#">ASP107(OD1)</a> | 3CF1A |                                                                                                                               | O[ ] ... O[-] |
| 3CF1A | <a href="#">CYS105(CB)</a> | 4.00 | <a href="#">ASP107(OD1)</a> | 3CF1A |                                                                                                                               | C[ ] ... O[-] |
| 3CF1A | <a href="#">CYS105(SG)</a> | 4.70 | <a href="#">ASP107(N)</a>   | 3CF1A | [D-A-AA]:89.0° [A-D-DD]:107.1° d_planarity:-8.6°,<br><b>maximum distance exceeded</b>                                         |               |
| 3CF1A | <a href="#">CYS105(SG)</a> | 3.98 | <a href="#">ASP107(CG)</a>  | 3CF1A |                                                                                                                               | S[ ] ... C[ ] |
| 3CF1A | <a href="#">CYS105(SG)</a> | 2.84 | <a href="#">ASP107(OD1)</a> | 3CF1A | Negative                                                                                                                      | S[ ] ... O[-] |
| 3CF1A | <a href="#">CYS105(SG)</a> | 4.49 | <a href="#">ASP107(OD2)</a> | 3CF1A |                                                                                                                               | S[ ] ... O[-] |
| 3CF1A | <a href="#">CYS105(C)</a>  | 4.52 | <a href="#">VAL108(N)</a>   | 3CF1A |                                                                                                                               |               |
| 3CF1A | <a href="#">CYS105(C)</a>  | 4.51 | <a href="#">VAL108(CG2)</a> | 3CF1A |                                                                                                                               |               |
| 3CF1A | <a href="#">CYS105(O)</a>  | 3.64 | <a href="#">VAL108(N)</a>   | 3CF1A | [D-A-AA]:129.3° [A-D-DD]:117.4° d_planarity:-21.1°<br>a_planarity:61.4°, <b>maximum distance exceeded</b>                     | O[ ] ... N[ ] |
| 3CF1A | <a href="#">CYS105(O)</a>  | 4.50 | <a href="#">VAL108(CA)</a>  | 3CF1A |                                                                                                                               | O[ ] ... C[ ] |
| 3CF1A | <a href="#">CYS105(O)</a>  | 4.11 | <a href="#">VAL108(CB)</a>  | 3CF1A |                                                                                                                               | O[ ] ... C[ ] |
| 3CF1A | <a href="#">CYS105(O)</a>  | 3.41 | <a href="#">VAL108(CG2)</a> | 3CF1A |                                                                                                                               | O[ ] ... C[ ] |
| 3CF1A | <a href="#">CYS105(CB)</a> | 4.32 | <a href="#">VAL108(CG2)</a> | 3CF1A |                                                                                                                               | C[ ] ... C[ ] |
| 3CF1A | <a href="#">CYS105(SG)</a> | 4.83 | <a href="#">VAL108(N)</a>   | 3CF1A | [D-A-AA]:106.0° [A-D-DD]:103.5° d_planarity:-63.7°,<br><b>maximum distance exceeded, bad d_planarity</b>                      |               |
| 3CF1A | <a href="#">CYS105(SG)</a> | 4.99 | <a href="#">VAL108(CB)</a>  | 3CF1A |                                                                                                                               |               |
| 3CF1A | <a href="#">CYS105(SG)</a> | 3.59 | <a href="#">VAL108(CG2)</a> | 3CF1A |                                                                                                                               | S[ ] ... C[ ] |
| 3CF1A | <a href="#">CYS105(SG)</a> | 4.31 | <a href="#">TYR173(CE1)</a> | 3CF1A |                                                                                                                               | S[ ] ... C[ ] |
| 3CF1A | <a href="#">CYS105(SG)</a> | 4.67 | <a href="#">TYR173(CE2)</a> | 3CF1A |                                                                                                                               |               |
| 3CF1A | <a href="#">CYS105(SG)</a> | 4.08 | <a href="#">TYR173(CZ)</a>  | 3CF1A |                                                                                                                               | S[ ] ... C[ ] |
| 3CF1A | <a href="#">CYS105(SG)</a> | 3.89 | <a href="#">TYR173(OH)</a>  | 3CF1A | [D-A-AA]:155.7° [A-D-DD]:87.6° d_planarity:-80.3°,<br><b>maximum distance exceeded, bad d_angle(sp2),<br/>bad d_planarity</b> | S[ ] ... O[ ] |

| chain1 | res1/atm1                 | distance | res2/atm2                  | chain2 | H-bonding | Charge interaction |
|--------|---------------------------|----------|----------------------------|--------|-----------|--------------------|
| 2VL2A  | <a href="#">CYS47(CA)</a> | 4.79     | <a href="#">VAL39(CB)</a>  | 2VL2A  |           |                    |
| 2VL2A  | <a href="#">CYS47(CA)</a> | 4.78     | <a href="#">VAL39(CG1)</a> | 2VL2A  |           |                    |
| 2VL2A  | <a href="#">CYS47(CB)</a> | 3.83     | <a href="#">VAL39(CB)</a>  | 2VL2A  |           | C[ ] ... C[ ]      |
| 2VL2A  | <a href="#">CYS47(CB)</a> | 4.20     | <a href="#">VAL39(CG1)</a> | 2VL2A  |           | C[ ] ... C[ ]      |
| 2VL2A  | <a href="#">CYS47(CB)</a> | 4.26     | <a href="#">VAL39(CG2)</a> | 2VL2A  |           | C[ ] ... C[ ]      |
| 2VL2A  | <a href="#">CYS47(SG)</a> | 4.31     | <a href="#">VAL39(CA)</a>  | 2VL2A  |           | S[ ] ... C[ ]      |
| 2VL2A  | <a href="#">CYS47(SG)</a> | 4.37     | <a href="#">VAL39(C)</a>   | 2VL2A  |           | S[ ] ... C[ ]      |
| 2VL2A  | <a href="#">CYS47(SG)</a> | 3.59     | <a href="#">VAL39(CB)</a>  | 2VL2A  |           | S[ ] ... C[ ]      |

|       |                           |      |                            |       |                                                                                                                    |               |
|-------|---------------------------|------|----------------------------|-------|--------------------------------------------------------------------------------------------------------------------|---------------|
| 2VL2A | <a href="#">CYS47(SG)</a> | 4.44 | <a href="#">VAL39(CG1)</a> | 2VL2A |                                                                                                                    | S[ ] ... C[ ] |
| 2VL2A | <a href="#">CYS47(SG)</a> | 4.23 | <a href="#">VAL39(CG2)</a> | 2VL2A |                                                                                                                    | S[ ] ... C[ ] |
| 2VL2A | <a href="#">CYS47(SG)</a> | 3.86 | <a href="#">PRO40(N)</a>   | 2VL2A |                                                                                                                    | S[ ] ... N[ ] |
| 2VL2A | <a href="#">CYS47(SG)</a> | 4.54 | <a href="#">PRO40(CA)</a>  | 2VL2A |                                                                                                                    |               |
| 2VL2A | <a href="#">CYS47(SG)</a> | 4.60 | <a href="#">PRO40(C)</a>   | 2VL2A |                                                                                                                    |               |
| 2VL2A | <a href="#">CYS47(SG)</a> | 4.38 | <a href="#">PRO40(CB)</a>  | 2VL2A |                                                                                                                    | S[ ] ... C[ ] |
| 2VL2A | <a href="#">CYS47(SG)</a> | 4.31 | <a href="#">PRO40(CG)</a>  | 2VL2A |                                                                                                                    | S[ ] ... C[ ] |
| 2VL2A | <a href="#">CYS47(SG)</a> | 3.55 | <a href="#">PRO40(CD)</a>  | 2VL2A |                                                                                                                    | S[ ] ... C[ ] |
| 2VL2A | <a href="#">CYS47(CA)</a> | 4.80 | <a href="#">GLY41(O)</a>   | 2VL2A |                                                                                                                    |               |
| 2VL2A | <a href="#">CYS47(CB)</a> | 4.82 | <a href="#">GLY41(N)</a>   | 2VL2A |                                                                                                                    |               |
| 2VL2A | <a href="#">CYS47(CB)</a> | 4.44 | <a href="#">GLY41(C)</a>   | 2VL2A |                                                                                                                    | C[ ] ... C[ ] |
| 2VL2A | <a href="#">CYS47(CB)</a> | 3.35 | <a href="#">GLY41(O)</a>   | 2VL2A |                                                                                                                    | C[ ] ... O[ ] |
| 2VL2A | <a href="#">CYS47(SG)</a> | 3.71 | <a href="#">GLY41(N)</a>   | 2VL2A | <b>H-bond</b> [D-A-AA]:117.3° [A-D-DD]:113.2° d_planarity:-15.9°                                                   | S[ ] ... N[ ] |
| 2VL2A | <a href="#">CYS47(SG)</a> | 4.49 | <a href="#">GLY41(CA)</a>  | 2VL2A |                                                                                                                    | S[ ] ... C[ ] |
| 2VL2A | <a href="#">CYS47(SG)</a> | 4.25 | <a href="#">GLY41(C)</a>   | 2VL2A |                                                                                                                    | S[ ] ... C[ ] |
| 2VL2A | <a href="#">CYS47(SG)</a> | 3.37 | <a href="#">GLY41(O)</a>   | 2VL2A |                                                                                                                    | S[ ] ... O[ ] |
| 2VL2A | <a href="#">CYS47(N)</a>  | 4.16 | <a href="#">THR44(C)</a>   | 2VL2A |                                                                                                                    | N[ ] ... C[ ] |
| 2VL2A | <a href="#">CYS47(N)</a>  | 3.56 | <a href="#">THR44(O)</a>   | 2VL2A | [D-A-AA]:111.0° [A-D-DD]:95.2° d_planarity:-61.2°<br>a_planarity:74.4°, maximum distance exceeded, bad d_planarity | N[ ] ... O[ ] |
| 2VL2A | <a href="#">CYS47(N)</a>  | 4.92 | <a href="#">THR44(CB)</a>  | 2VL2A |                                                                                                                    |               |
| 2VL2A | <a href="#">CYS47(N)</a>  | 3.76 | <a href="#">THR44(OG1)</a> | 2VL2A | [D-A-AA]:138.4° [A-D-DD]:95.4° d_planarity:-9.3°, maximum distance exceeded                                        | N[ ] ... O[ ] |
| 2VL2A | <a href="#">CYS47(CA)</a> | 4.80 | <a href="#">THR44(C)</a>   | 2VL2A |                                                                                                                    |               |
| 2VL2A | <a href="#">CYS47(CA)</a> | 3.97 | <a href="#">THR44(O)</a>   | 2VL2A |                                                                                                                    | C[ ] ... O[ ] |
| 2VL2A | <a href="#">CYS47(CA)</a> | 4.16 | <a href="#">THR44(OG1)</a> | 2VL2A |                                                                                                                    | C[ ] ... O[ ] |
| 2VL2A | <a href="#">CYS47(C)</a>  | 4.92 | <a href="#">THR44(C)</a>   | 2VL2A |                                                                                                                    |               |
| 2VL2A | <a href="#">CYS47(C)</a>  | 3.83 | <a href="#">THR44(O)</a>   | 2VL2A |                                                                                                                    | C[ ] ... O[ ] |
| 2VL2A | <a href="#">CYS47(O)</a>  | 4.95 | <a href="#">THR44(O)</a>   | 2VL2A |                                                                                                                    |               |
| 2VL2A | <a href="#">CYS47(CB)</a> | 4.79 | <a href="#">THR44(N)</a>   | 2VL2A |                                                                                                                    |               |
| 2VL2A | <a href="#">CYS47(CB)</a> | 4.93 | <a href="#">THR44(CA)</a>  | 2VL2A |                                                                                                                    |               |
| 2VL2A | <a href="#">CYS47(CB)</a> | 4.63 | <a href="#">THR44(C)</a>   | 2VL2A |                                                                                                                    |               |
| 2VL2A | <a href="#">CYS47(CB)</a> | 3.96 | <a href="#">THR44(O)</a>   | 2VL2A |                                                                                                                    | C[ ] ... O[ ] |
| 2VL2A | <a href="#">CYS47(CB)</a> | 4.63 | <a href="#">THR44(CB)</a>  | 2VL2A |                                                                                                                    |               |
| 2VL2A | <a href="#">CYS47(CB)</a> | 3.32 | <a href="#">THR44(OG1)</a> | 2VL2A |                                                                                                                    | C[ ] ... O[ ] |
| 2VL2A | <a href="#">CYS47(SG)</a> | 4.98 | <a href="#">THR44(C)</a>   | 2VL2A |                                                                                                                    |               |
| 2VL2A | <a href="#">CYS47(SG)</a> | 4.74 | <a href="#">THR44(O)</a>   | 2VL2A |                                                                                                                    |               |
| 2VL2A | <a href="#">CYS47(SG)</a> | 4.16 | <a href="#">THR44(CB)</a>  | 2VL2A |                                                                                                                    | S[ ] ... C[ ] |
| 2VL2A | <a href="#">CYS47(SG)</a> | 2.75 | <a href="#">THR44(OG1)</a> | 2VL2A | <b>H-bond</b> [D-A-AA]:91.1° [A-D-DD]:169.5°                                                                       | S[ ] ... O[ ] |
| 2VL2A | <a href="#">CYS47(SG)</a> | 4.73 | <a href="#">THR44(CG2)</a> | 2VL2A |                                                                                                                    |               |
| 2VL2A | <a href="#">CYS47(N)</a>  | 4.57 | <a href="#">PRO45(N)</a>   | 2VL2A |                                                                                                                    |               |
| 2VL2A | <a href="#">CYS47(N)</a>  | 4.50 | <a href="#">PRO45(CA)</a>  | 2VL2A |                                                                                                                    | N[ ] ... C[ ] |
| 2VL2A | <a href="#">CYS47(N)</a>  | 3.29 | <a href="#">PRO45(C)</a>   | 2VL2A |                                                                                                                    | N[ ] ... C[ ] |
| 2VL2A | <a href="#">CYS47(N)</a>  | 3.32 | <a href="#">PRO45(O)</a>   | 2VL2A | [D-A-AA]:77.7° [A-D-DD]:119.2° d_planarity:67.8°<br>a_planarity:44.3°, bad a_angle(sp2), bad d_planarity           | N[ ] ... O[ ] |
| 2VL2A | <a href="#">CYS47(CA)</a> | 4.45 | <a href="#">PRO45(C)</a>   | 2VL2A |                                                                                                                    | C[ ] ... C[ ] |
| 2VL2A | <a href="#">CYS47(CA)</a> | 4.23 | <a href="#">PRO45(O)</a>   | 2VL2A |                                                                                                                    | C[ ] ... O[ ] |
| 2VL2A | <a href="#">CYS47(C)</a>  | 4.55 | <a href="#">PRO45(C)</a>   | 2VL2A |                                                                                                                    |               |
| 2VL2A | <a href="#">CYS47(C)</a>  | 3.97 | <a href="#">PRO45(O)</a>   | 2VL2A |                                                                                                                    | C[ ] ... O[ ] |
| 2VL2A | <a href="#">CYS47(O)</a>  | 4.97 | <a href="#">PRO45(O)</a>   | 2VL2A |                                                                                                                    |               |
| 2VL2A | <a href="#">CYS47(N)</a>  | 2.86 | <a href="#">GLY46(N)</a>   | 2VL2A |                                                                                                                    | N[ ] ... N[ ] |

|       |                           |      |                           |       |                                                                                                                          |               |
|-------|---------------------------|------|---------------------------|-------|--------------------------------------------------------------------------------------------------------------------------|---------------|
| 2VL2A | <a href="#">CYS47(N)</a>  | 2.42 | <a href="#">GLY46(CA)</a> | 2VL2A |                                                                                                                          | N[ ] ... C[ ] |
| 2VL2A | <a href="#">CYS47(N)</a>  | 2.26 | <a href="#">GLY46(O)</a>  | 2VL2A | [D-A-AA]:29.5° [A-D-DD]:95.6° d_planarity:0.3°<br>a_planarity:0.5°, <b>bad a_angle(sp2)</b>                              | N[ ] ... O[ ] |
| 2VL2A | <a href="#">CYS47(CA)</a> | 4.26 | <a href="#">GLY46(N)</a>  | 2VL2A |                                                                                                                          | C[ ] ... N[ ] |
| 2VL2A | <a href="#">CYS47(CA)</a> | 3.81 | <a href="#">GLY46(CA)</a> | 2VL2A |                                                                                                                          | C[ ] ... C[ ] |
| 2VL2A | <a href="#">CYS47(CA)</a> | 2.45 | <a href="#">GLY46(C)</a>  | 2VL2A |                                                                                                                          | C[ ] ... C[ ] |
| 2VL2A | <a href="#">CYS47(CA)</a> | 2.81 | <a href="#">GLY46(O)</a>  | 2VL2A |                                                                                                                          | C[ ] ... O[ ] |
| 2VL2A | <a href="#">CYS47(C)</a>  | 4.78 | <a href="#">GLY46(N)</a>  | 2VL2A |                                                                                                                          |               |
| 2VL2A | <a href="#">CYS47(C)</a>  | 4.47 | <a href="#">GLY46(CA)</a> | 2VL2A |                                                                                                                          | C[ ] ... C[ ] |
| 2VL2A | <a href="#">CYS47(C)</a>  | 3.08 | <a href="#">GLY46(C)</a>  | 2VL2A |                                                                                                                          | C[ ] ... C[ ] |
| 2VL2A | <a href="#">CYS47(C)</a>  | 3.04 | <a href="#">GLY46(O)</a>  | 2VL2A |                                                                                                                          | C[ ] ... O[ ] |
| 2VL2A | <a href="#">CYS47(O)</a>  | 4.02 | <a href="#">GLY46(C)</a>  | 2VL2A |                                                                                                                          | O[ ] ... C[ ] |
| 2VL2A | <a href="#">CYS47(O)</a>  | 3.66 | <a href="#">GLY46(O)</a>  | 2VL2A |                                                                                                                          | O[ ] ... O[ ] |
| 2VL2A | <a href="#">CYS47(CB)</a> | 5.00 | <a href="#">GLY46(N)</a>  | 2VL2A |                                                                                                                          |               |
| 2VL2A | <a href="#">CYS47(CB)</a> | 4.83 | <a href="#">GLY46(CA)</a> | 2VL2A |                                                                                                                          |               |
| 2VL2A | <a href="#">CYS47(CB)</a> | 3.72 | <a href="#">GLY46(C)</a>  | 2VL2A |                                                                                                                          | C[ ] ... C[ ] |
| 2VL2A | <a href="#">CYS47(CB)</a> | 4.29 | <a href="#">GLY46(O)</a>  | 2VL2A |                                                                                                                          | C[ ] ... O[ ] |
| 2VL2A | <a href="#">CYS47(SG)</a> | 4.93 | <a href="#">GLY46(CA)</a> | 2VL2A |                                                                                                                          |               |
| 2VL2A | <a href="#">CYS47(SG)</a> | 4.22 | <a href="#">GLY46(C)</a>  | 2VL2A |                                                                                                                          | S[ ] ... C[ ] |
| 2VL2A | <a href="#">CYS47(N)</a>  | 2.79 | <a href="#">SER48(N)</a>  | 2VL2A |                                                                                                                          | N[ ] ... N[ ] |
| 2VL2A | <a href="#">CYS47(N)</a>  | 4.23 | <a href="#">SER48(CA)</a> | 2VL2A |                                                                                                                          | N[ ] ... C[ ] |
| 2VL2A | <a href="#">CYS47(N)</a>  | 4.91 | <a href="#">SER48(C)</a>  | 2VL2A |                                                                                                                          |               |
| 2VL2A | <a href="#">CYS47(N)</a>  | 4.98 | <a href="#">SER48(CB)</a> | 2VL2A |                                                                                                                          |               |
| 2VL2A | <a href="#">CYS47(CA)</a> | 2.42 | <a href="#">SER48(N)</a>  | 2VL2A |                                                                                                                          | C[ ] ... N[ ] |
| 2VL2A | <a href="#">CYS47(CA)</a> | 3.80 | <a href="#">SER48(CA)</a> | 2VL2A |                                                                                                                          | C[ ] ... C[ ] |
| 2VL2A | <a href="#">CYS47(CA)</a> | 4.69 | <a href="#">SER48(C)</a>  | 2VL2A |                                                                                                                          |               |
| 2VL2A | <a href="#">CYS47(CA)</a> | 4.75 | <a href="#">SER48(CB)</a> | 2VL2A |                                                                                                                          |               |
| 2VL2A | <a href="#">CYS47(CA)</a> | 4.66 | <a href="#">SER48(OG)</a> | 2VL2A |                                                                                                                          |               |
| 2VL2A | <a href="#">CYS47(C)</a>  | 2.44 | <a href="#">SER48(CA)</a> | 2VL2A |                                                                                                                          | C[ ] ... C[ ] |
| 2VL2A | <a href="#">CYS47(C)</a>  | 3.34 | <a href="#">SER48(C)</a>  | 2VL2A |                                                                                                                          | C[ ] ... C[ ] |
| 2VL2A | <a href="#">CYS47(C)</a>  | 4.27 | <a href="#">SER48(O)</a>  | 2VL2A |                                                                                                                          | C[ ] ... O[ ] |
| 2VL2A | <a href="#">CYS47(C)</a>  | 3.63 | <a href="#">SER48(CB)</a> | 2VL2A |                                                                                                                          | C[ ] ... C[ ] |
| 2VL2A | <a href="#">CYS47(C)</a>  | 3.77 | <a href="#">SER48(OG)</a> | 2VL2A |                                                                                                                          | C[ ] ... O[ ] |
| 2VL2A | <a href="#">CYS47(O)</a>  | 2.26 | <a href="#">SER48(N)</a>  | 2VL2A | [D-A-AA]:29.5° [A-D-DD]:94.9° d_planarity:3.5°<br>a_planarity:0.8°, <b>bad a_angle(sp2)</b>                              | O[ ] ... N[ ] |
| 2VL2A | <a href="#">CYS47(O)</a>  | 2.79 | <a href="#">SER48(CA)</a> | 2VL2A |                                                                                                                          | O[ ] ... C[ ] |
| 2VL2A | <a href="#">CYS47(O)</a>  | 3.50 | <a href="#">SER48(C)</a>  | 2VL2A |                                                                                                                          | O[ ] ... C[ ] |
| 2VL2A | <a href="#">CYS47(O)</a>  | 4.13 | <a href="#">SER48(O)</a>  | 2VL2A |                                                                                                                          | O[ ] ... O[ ] |
| 2VL2A | <a href="#">CYS47(O)</a>  | 4.16 | <a href="#">SER48(CB)</a> | 2VL2A |                                                                                                                          | O[ ] ... C[ ] |
| 2VL2A | <a href="#">CYS47(O)</a>  | 4.35 | <a href="#">SER48(OG)</a> | 2VL2A | [D-A-AA]:55.0° [A-D-DD]:72.9° a_planarity:40.5°, <b>maximum distance exceeded, bad a_angle(sp2)</b>                      | O[ ] ... O[ ] |
| 2VL2A | <a href="#">CYS47(CB)</a> | 3.19 | <a href="#">SER48(N)</a>  | 2VL2A |                                                                                                                          | C[ ] ... N[ ] |
| 2VL2A | <a href="#">CYS47(CB)</a> | 4.43 | <a href="#">SER48(CA)</a> | 2VL2A |                                                                                                                          | C[ ] ... C[ ] |
| 2VL2A | <a href="#">CYS47(CB)</a> | 4.50 | <a href="#">SER48(OG)</a> | 2VL2A |                                                                                                                          |               |
| 2VL2A | <a href="#">CYS47(SG)</a> | 4.73 | <a href="#">SER48(N)</a>  | 2VL2A | [D-A-AA]:25.4° [A-D-DD]:153.0° d_planarity:77.7°,<br><b>maximum distance exceeded, bad a_angle(sp3), bad d_planarity</b> |               |
| 2VL2A | <a href="#">CYS47(N)</a>  | 4.54 | <a href="#">LYS49(N)</a>  | 2VL2A |                                                                                                                          |               |
| 2VL2A | <a href="#">CYS47(CA)</a> | 4.69 | <a href="#">LYS49(N)</a>  | 2VL2A |                                                                                                                          |               |
| 2VL2A | <a href="#">CYS47(C)</a>  | 3.61 | <a href="#">LYS49(N)</a>  | 2VL2A |                                                                                                                          | C[ ] ... N[ ] |
| 2VL2A | <a href="#">CYS47(C)</a>  | 4.94 | <a href="#">LYS49(CA)</a> | 2VL2A |                                                                                                                          |               |

|       |                           |      |                             |       |                                                                                                                                        |               |
|-------|---------------------------|------|-----------------------------|-------|----------------------------------------------------------------------------------------------------------------------------------------|---------------|
| 2VL2A | <a href="#">CYS47(O)</a>  | 4.01 | <a href="#">LYS49(N)</a>    | 2VL2A | [D-A-AA]:63.0° [A-D-DD]:139.4° d_planarity:75.2°<br>a_planarity:37.1°, maximum distance exceeded,<br>bad a_angle(sp2), bad d_planarity | O[ ] ... N[ ] |
| 2VL2A | <a href="#">CYS47(C)</a>  | 4.40 | <a href="#">THR50(N)</a>    | 2VL2A |                                                                                                                                        | C[ ] ... N[ ] |
| 2VL2A | <a href="#">CYS47(C)</a>  | 4.97 | <a href="#">THR50(C)</a>    | 2VL2A |                                                                                                                                        |               |
| 2VL2A | <a href="#">CYS47(O)</a>  | 4.36 | <a href="#">THR50(N)</a>    | 2VL2A | [D-A-AA]:83.6° [A-D-DD]:108.9° d_planarity:-31.5°<br>a_planarity:69.2°, maximum distance exceeded,<br>bad a_angle(sp2)                 | O[ ] ... N[ ] |
| 2VL2A | <a href="#">CYS47(O)</a>  | 4.46 | <a href="#">THR50(C)</a>    | 2VL2A |                                                                                                                                        | O[ ] ... C[ ] |
| 2VL2A | <a href="#">CYS47(N)</a>  | 4.89 | <a href="#">HIS51(N)</a>    | 2VL2A |                                                                                                                                        |               |
| 2VL2A | <a href="#">CYS47(N)</a>  | 4.75 | <a href="#">HIS51(CB)</a>   | 2VL2A |                                                                                                                                        |               |
| 2VL2A | <a href="#">CYS47(CA)</a> | 4.44 | <a href="#">HIS51(N)</a>    | 2VL2A |                                                                                                                                        | C[ ] ... N[ ] |
| 2VL2A | <a href="#">CYS47(CA)</a> | 4.75 | <a href="#">HIS51(CA)</a>   | 2VL2A |                                                                                                                                        |               |
| 2VL2A | <a href="#">CYS47(CA)</a> | 3.98 | <a href="#">HIS51(CB)</a>   | 2VL2A |                                                                                                                                        | C[ ] ... C[ ] |
| 2VL2A | <a href="#">CYS47(C)</a>  | 4.09 | <a href="#">HIS51(N)</a>    | 2VL2A |                                                                                                                                        | C[ ] ... N[ ] |
| 2VL2A | <a href="#">CYS47(C)</a>  | 4.58 | <a href="#">HIS51(CA)</a>   | 2VL2A |                                                                                                                                        |               |
| 2VL2A | <a href="#">CYS47(C)</a>  | 4.87 | <a href="#">HIS51(C)</a>    | 2VL2A |                                                                                                                                        |               |
| 2VL2A | <a href="#">CYS47(C)</a>  | 4.26 | <a href="#">HIS51(CB)</a>   | 2VL2A |                                                                                                                                        | C[ ] ... C[ ] |
| 2VL2A | <a href="#">CYS47(O)</a>  | 3.61 | <a href="#">HIS51(N)</a>    | 2VL2A | [D-A-AA]:103.9° [A-D-DD]:90.0° d_planarity:-52.0°<br>a_planarity:-73.3°, maximum distance exceeded,<br>bad d_angle(sp2)                | O[ ] ... N[ ] |
| 2VL2A | <a href="#">CYS47(O)</a>  | 3.89 | <a href="#">HIS51(CA)</a>   | 2VL2A |                                                                                                                                        | O[ ] ... C[ ] |
| 2VL2A | <a href="#">CYS47(O)</a>  | 3.86 | <a href="#">HIS51(C)</a>    | 2VL2A |                                                                                                                                        | O[ ] ... C[ ] |
| 2VL2A | <a href="#">CYS47(O)</a>  | 3.78 | <a href="#">HIS51(CB)</a>   | 2VL2A |                                                                                                                                        | O[ ] ... C[ ] |
| 2VL2A | <a href="#">CYS47(CB)</a> | 4.93 | <a href="#">HIS51(CB)</a>   | 2VL2A |                                                                                                                                        |               |
| 2VL2A | <a href="#">CYS47(CA)</a> | 4.80 | <a href="#">LEU52(N)</a>    | 2VL2A |                                                                                                                                        |               |
| 2VL2A | <a href="#">CYS47(C)</a>  | 4.09 | <a href="#">LEU52(N)</a>    | 2VL2A |                                                                                                                                        | C[ ] ... N[ ] |
| 2VL2A | <a href="#">CYS47(C)</a>  | 4.63 | <a href="#">LEU52(CB)</a>   | 2VL2A |                                                                                                                                        |               |
| 2VL2A | <a href="#">CYS47(O)</a>  | 2.94 | <a href="#">LEU52(N)</a>    | 2VL2A | <b>H-bond</b> [D-A-AA]:155.1° [A-D-DD]:113.7° d_planarity:-5.0°<br>a_planarity:-48.0°                                                  | O[ ] ... N[ ] |
| 2VL2A | <a href="#">CYS47(O)</a>  | 3.77 | <a href="#">LEU52(CA)</a>   | 2VL2A |                                                                                                                                        | O[ ] ... C[ ] |
| 2VL2A | <a href="#">CYS47(O)</a>  | 4.79 | <a href="#">LEU52(C)</a>    | 2VL2A |                                                                                                                                        |               |
| 2VL2A | <a href="#">CYS47(O)</a>  | 3.46 | <a href="#">LEU52(CB)</a>   | 2VL2A |                                                                                                                                        | O[ ] ... C[ ] |
| 2VL2A | <a href="#">CYS47(O)</a>  | 4.83 | <a href="#">LEU52(CG)</a>   | 2VL2A |                                                                                                                                        |               |
| 2VL2A | <a href="#">CYS47(C)</a>  | 4.64 | <a href="#">PRO53(CD)</a>   | 2VL2A |                                                                                                                                        |               |
| 2VL2A | <a href="#">CYS47(O)</a>  | 4.66 | <a href="#">PRO53(N)</a>    | 2VL2A |                                                                                                                                        |               |
| 2VL2A | <a href="#">CYS47(O)</a>  | 4.80 | <a href="#">PRO53(CG)</a>   | 2VL2A |                                                                                                                                        |               |
| 2VL2A | <a href="#">CYS47(O)</a>  | 3.67 | <a href="#">PRO53(CD)</a>   | 2VL2A |                                                                                                                                        | O[ ] ... C[ ] |
| 2VL2A | <a href="#">CYS47(CA)</a> | 4.48 | <a href="#">TRP84(CZ2)</a>  | 2VL2A |                                                                                                                                        | C[ ] ... C[ ] |
| 2VL2A | <a href="#">CYS47(CA)</a> | 4.70 | <a href="#">TRP84(CH2)</a>  | 2VL2A |                                                                                                                                        |               |
| 2VL2A | <a href="#">CYS47(C)</a>  | 4.89 | <a href="#">TRP84(CE2)</a>  | 2VL2A |                                                                                                                                        |               |
| 2VL2A | <a href="#">CYS47(C)</a>  | 3.75 | <a href="#">TRP84(CZ2)</a>  | 2VL2A |                                                                                                                                        | C[ ] ... C[ ] |
| 2VL2A | <a href="#">CYS47(C)</a>  | 4.29 | <a href="#">TRP84(CH2)</a>  | 2VL2A |                                                                                                                                        | C[ ] ... C[ ] |
| 2VL2A | <a href="#">CYS47(O)</a>  | 4.71 | <a href="#">TRP84(CE2)</a>  | 2VL2A |                                                                                                                                        |               |
| 2VL2A | <a href="#">CYS47(O)</a>  | 3.53 | <a href="#">TRP84(CZ2)</a>  | 2VL2A |                                                                                                                                        | O[ ] ... C[ ] |
| 2VL2A | <a href="#">CYS47(O)</a>  | 3.94 | <a href="#">TRP84(CH2)</a>  | 2VL2A |                                                                                                                                        | O[ ] ... C[ ] |
| 2VL2A | <a href="#">CYS47(CB)</a> | 3.89 | <a href="#">TRP84(CZ2)</a>  | 2VL2A |                                                                                                                                        | C[ ] ... C[ ] |
| 2VL2A | <a href="#">CYS47(CB)</a> | 3.92 | <a href="#">TRP84(CH2)</a>  | 2VL2A |                                                                                                                                        | C[ ] ... C[ ] |
| 2VL2A | <a href="#">CYS47(N)</a>  | 4.26 | <a href="#">ARG127(CZ)</a>  | 2VL2A |                                                                                                                                        | N[ ] ... C[ ] |
| 2VL2A | <a href="#">CYS47(N)</a>  | 3.95 | <a href="#">ARG127(NH1)</a> | 2VL2A |                                                                                                                                        | N[ ] ... N[+] |
| 2VL2A | <a href="#">CYS47(N)</a>  | 3.83 | <a href="#">ARG127(NH2)</a> | 2VL2A |                                                                                                                                        | N[ ] ... N[+] |

|       |                           |      |                             |       |                                                                                 |               |
|-------|---------------------------|------|-----------------------------|-------|---------------------------------------------------------------------------------|---------------|
| 2VL2A | <a href="#">CYS47(CA)</a> | 4.52 | <a href="#">ARG127(CZ)</a>  | 2VL2A |                                                                                 |               |
| 2VL2A | <a href="#">CYS47(CA)</a> | 3.78 | <a href="#">ARG127(NH1)</a> | 2VL2A |                                                                                 | C[ ] ... N[+] |
| 2VL2A | <a href="#">CYS47(CA)</a> | 4.44 | <a href="#">ARG127(NH2)</a> | 2VL2A |                                                                                 | C[ ] ... N[+] |
| 2VL2A | <a href="#">CYS47(CB)</a> | 4.84 | <a href="#">ARG127(CZ)</a>  | 2VL2A |                                                                                 |               |
| 2VL2A | <a href="#">CYS47(CB)</a> | 4.01 | <a href="#">ARG127(NH1)</a> | 2VL2A |                                                                                 | C[ ] ... N[+] |
| 2VL2A | <a href="#">CYS47(CB)</a> | 4.70 | <a href="#">ARG127(NH2)</a> | 2VL2A |                                                                                 |               |
| 2VL2A | <a href="#">CYS47(SG)</a> | 3.97 | <a href="#">ARG127(CZ)</a>  | 2VL2A |                                                                                 | S[ ] ... C[ ] |
| 2VL2A | <a href="#">CYS47(SG)</a> | 3.43 | <a href="#">ARG127(NH1)</a> | 2VL2A | <b>H-bond</b> [D-A-AA]:94.6° [A-D-DD]:104.6° d_planarity:12.2°                  | S[ ] ... N[+] |
| 2VL2A | <a href="#">CYS47(SG)</a> | 3.61 | <a href="#">ARG127(NH2)</a> | 2VL2A | <b>H-bond</b> [D-A-AA]:116.0° [A-D-DD]:96.3° d_planarity:11.3°                  | S[ ] ... N[+] |
| 2VL2A | <a href="#">CYS47(N)</a>  | 4.46 | <a href="#">BEZ1162(C)</a>  | 2VL2A |                                                                                 | N[ ] ... C[ ] |
| 2VL2A | <a href="#">CYS47(N)</a>  | 3.58 | <a href="#">BEZ1162(O1)</a> | 2VL2A | <b>H-bond</b> [D-A-AA]:128.2° [A-D-DD]:135.2° d_planarity:-4.5°                 | N[ ] ... O[ ] |
| 2VL2A | <a href="#">CYS47(N)</a>  | 4.72 | <a href="#">BEZ1162(O2)</a> | 2VL2A | [D-A-AA]:70.5° [A-D-DD]:159.7° d_planarity:-22.4°,<br>maximum distance exceeded |               |
| 2VL2A | <a href="#">CYS47(CA)</a> | 4.73 | <a href="#">BEZ1162(O1)</a> | 2VL2A |                                                                                 |               |
| 2VL2A | <a href="#">CYS47(CB)</a> | 4.64 | <a href="#">BEZ1162(O1)</a> | 2VL2A |                                                                                 |               |
| 2VL2A | <a href="#">CYS47(SG)</a> | 4.77 | <a href="#">BEZ1162(C)</a>  | 2VL2A |                                                                                 |               |
| 2VL2A | <a href="#">CYS47(SG)</a> | 3.82 | <a href="#">BEZ1162(O1)</a> | 2VL2A | [D-A-AA]:105.1° [A-D-DD]:132.9°, maximum distance exceeded                      | S[ ] ... O[ ] |
| 2VL2A | <a href="#">CYS47(SG)</a> | 4.79 | <a href="#">BEZ1162(C6)</a> | 2VL2A |                                                                                 |               |

| chain1 | res1/atm1                 | distance | res2/atm2                 | chain2 | H-bonding                                                                                                                              | Charge interaction |
|--------|---------------------------|----------|---------------------------|--------|----------------------------------------------------------------------------------------------------------------------------------------|--------------------|
| 1GZWA  | <a href="#">CYS42(N)</a>  | 3.90     | <a href="#">LEU34(C)</a>  | 1GZWA  |                                                                                                                                        | N[ ] ... C[ ]      |
| 1GZWA  | <a href="#">CYS42(N)</a>  | 2.85     | <a href="#">LEU34(O)</a>  | 1GZWA  | <b>H-bond</b> [D-A-AA]:143.0° [A-D-DD]:123.8° d_planarity:-43.5° a_planarity:33.0°                                                     | N[ ] ... O[ ]      |
| 1GZWA  | <a href="#">CYS42(CA)</a> | 4.84     | <a href="#">LEU34(C)</a>  | 1GZWA  |                                                                                                                                        |                    |
| 1GZWA  | <a href="#">CYS42(CA)</a> | 3.85     | <a href="#">LEU34(O)</a>  | 1GZWA  |                                                                                                                                        | C[ ] ... O[ ]      |
| 1GZWA  | <a href="#">CYS42(C)</a>  | 4.98     | <a href="#">LEU34(C)</a>  | 1GZWA  |                                                                                                                                        |                    |
| 1GZWA  | <a href="#">CYS42(C)</a>  | 3.95     | <a href="#">LEU34(O)</a>  | 1GZWA  |                                                                                                                                        | C[ ] ... O[ ]      |
| 1GZWA  | <a href="#">CYS42(CB)</a> | 4.96     | <a href="#">LEU34(C)</a>  | 1GZWA  |                                                                                                                                        |                    |
| 1GZWA  | <a href="#">CYS42(CB)</a> | 4.27     | <a href="#">LEU34(O)</a>  | 1GZWA  |                                                                                                                                        | C[ ] ... O[ ]      |
| 1GZWA  | <a href="#">CYS42(SG)</a> | 4.74     | <a href="#">LEU34(CA)</a> | 1GZWA  |                                                                                                                                        |                    |
| 1GZWA  | <a href="#">CYS42(SG)</a> | 3.85     | <a href="#">LEU34(C)</a>  | 1GZWA  |                                                                                                                                        | S[ ] ... C[ ]      |
| 1GZWA  | <a href="#">CYS42(SG)</a> | 3.56     | <a href="#">LEU34(O)</a>  | 1GZWA  |                                                                                                                                        | S[ ] ... O[ ]      |
| 1GZWA  | <a href="#">CYS42(SG)</a> | 4.26     | <a href="#">LEU34(CB)</a> | 1GZWA  |                                                                                                                                        | S[ ] ... C[ ]      |
| 1GZWA  | <a href="#">CYS42(N)</a>  | 4.33     | <a href="#">GLY35(N)</a>  | 1GZWA  |                                                                                                                                        | N[ ] ... N[ ]      |
| 1GZWA  | <a href="#">CYS42(N)</a>  | 3.77     | <a href="#">GLY35(CA)</a> | 1GZWA  |                                                                                                                                        | N[ ] ... C[ ]      |
| 1GZWA  | <a href="#">CYS42(CA)</a> | 4.83     | <a href="#">GLY35(CA)</a> | 1GZWA  |                                                                                                                                        |                    |
| 1GZWA  | <a href="#">CYS42(CB)</a> | 4.68     | <a href="#">GLY35(CA)</a> | 1GZWA  |                                                                                                                                        |                    |
| 1GZWA  | <a href="#">CYS42(SG)</a> | 4.02     | <a href="#">GLY35(N)</a>  | 1GZWA  | [D-A-AA]:121.2° [A-D-DD]:73.8° d_planarity:59.8°,<br>maximum distance exceeded, bad d_angle(sp2)                                       | S[ ] ... N[ ]      |
| 1GZWA  | <a href="#">CYS42(SG)</a> | 3.87     | <a href="#">GLY35(CA)</a> | 1GZWA  |                                                                                                                                        | S[ ] ... C[ ]      |
| 1GZWA  | <a href="#">CYS42(SG)</a> | 4.94     | <a href="#">GLY35(C)</a>  | 1GZWA  |                                                                                                                                        |                    |
| 1GZWA  | <a href="#">CYS42(N)</a>  | 4.23     | <a href="#">ASN40(C)</a>  | 1GZWA  |                                                                                                                                        | N[ ] ... C[ ]      |
| 1GZWA  | <a href="#">CYS42(N)</a>  | 4.16     | <a href="#">ASN40(O)</a>  | 1GZWA  | [D-A-AA]:84.9° [A-D-DD]:148.6° d_planarity:88.8°<br>a_planarity:24.4°, maximum distance exceeded,<br>bad a_angle(sp2), bad d_planarity | N[ ] ... O[ ]      |
| 1GZWA  | <a href="#">CYS42(N)</a>  | 3.54     | <a href="#">LEU41(N)</a>  | 1GZWA  |                                                                                                                                        | N[ ] ... N[ ]      |
| 1GZWA  | <a href="#">CYS42(N)</a>  | 2.43     | <a href="#">LEU41(CA)</a> | 1GZWA  |                                                                                                                                        | N[ ] ... C[ ]      |



|       |                           |      |                            |       |                                                                                                                                         |               |
|-------|---------------------------|------|----------------------------|-------|-----------------------------------------------------------------------------------------------------------------------------------------|---------------|
| 1GZWA | <a href="#">CYS42(N)</a>  | 2.25 | <a href="#">LEU41(O)</a>   | 1GZWA | [D-A-AA]:29.8° [A-D-DD]:92.6° d_planarity:0.8°<br>a_planarity:0.5°, bad a_angle(sp2)                                                    | N[ ] ... O[ ] |
| 1GZWA | <a href="#">CYS42(N)</a>  | 3.38 | <a href="#">LEU41(CB)</a>  | 1GZWA |                                                                                                                                         | N[ ] ... C[ ] |
| 1GZWA | <a href="#">CYS42(N)</a>  | 4.74 | <a href="#">LEU41(CG)</a>  | 1GZWA |                                                                                                                                         |               |
| 1GZWA | <a href="#">CYS42(N)</a>  | 4.97 | <a href="#">LEU41(CD2)</a> | 1GZWA |                                                                                                                                         |               |
| 1GZWA | <a href="#">CYS42(CA)</a> | 4.80 | <a href="#">LEU41(N)</a>   | 1GZWA |                                                                                                                                         |               |
| 1GZWA | <a href="#">CYS42(CA)</a> | 3.79 | <a href="#">LEU41(CA)</a>  | 1GZWA |                                                                                                                                         | C[ ] ... C[ ] |
| 1GZWA | <a href="#">CYS42(CA)</a> | 2.41 | <a href="#">LEU41(C)</a>   | 1GZWA |                                                                                                                                         | C[ ] ... C[ ] |
| 1GZWA | <a href="#">CYS42(CA)</a> | 2.73 | <a href="#">LEU41(O)</a>   | 1GZWA |                                                                                                                                         | C[ ] ... O[ ] |
| 1GZWA | <a href="#">CYS42(CA)</a> | 4.60 | <a href="#">LEU41(CB)</a>  | 1GZWA |                                                                                                                                         |               |
| 1GZWA | <a href="#">CYS42(C)</a>  | 4.42 | <a href="#">LEU41(CA)</a>  | 1GZWA |                                                                                                                                         | C[ ] ... C[ ] |
| 1GZWA | <a href="#">CYS42(C)</a>  | 3.13 | <a href="#">LEU41(C)</a>   | 1GZWA |                                                                                                                                         | C[ ] ... C[ ] |
| 1GZWA | <a href="#">CYS42(C)</a>  | 3.28 | <a href="#">LEU41(O)</a>   | 1GZWA |                                                                                                                                         | C[ ] ... O[ ] |
| 1GZWA | <a href="#">CYS42(C)</a>  | 4.76 | <a href="#">LEU41(CB)</a>  | 1GZWA |                                                                                                                                         |               |
| 1GZWA | <a href="#">CYS42(O)</a>  | 4.15 | <a href="#">LEU41(C)</a>   | 1GZWA |                                                                                                                                         | O[ ] ... C[ ] |
| 1GZWA | <a href="#">CYS42(O)</a>  | 4.02 | <a href="#">LEU41(O)</a>   | 1GZWA |                                                                                                                                         | O[ ] ... O[ ] |
| 1GZWA | <a href="#">CYS42(CB)</a> | 4.85 | <a href="#">LEU41(CA)</a>  | 1GZWA |                                                                                                                                         |               |
| 1GZWA | <a href="#">CYS42(CB)</a> | 3.67 | <a href="#">LEU41(C)</a>   | 1GZWA |                                                                                                                                         | C[ ] ... C[ ] |
| 1GZWA | <a href="#">CYS42(CB)</a> | 4.16 | <a href="#">LEU41(O)</a>   | 1GZWA |                                                                                                                                         | C[ ] ... O[ ] |
| 1GZWA | <a href="#">CYS42(SG)</a> | 4.49 | <a href="#">LEU41(C)</a>   | 1GZWA |                                                                                                                                         | S[ ] ... C[ ] |
| 1GZWA | <a href="#">CYS42(N)</a>  | 2.59 | <a href="#">LEU43(N)</a>   | 1GZWA |                                                                                                                                         | N[ ] ... N[ ] |
| 1GZWA | <a href="#">CYS42(N)</a>  | 4.03 | <a href="#">LEU43(CA)</a>  | 1GZWA |                                                                                                                                         | N[ ] ... C[ ] |
| 1GZWA | <a href="#">CYS42(N)</a>  | 4.75 | <a href="#">LEU43(C)</a>   | 1GZWA |                                                                                                                                         |               |
| 1GZWA | <a href="#">CYS42(N)</a>  | 5.00 | <a href="#">LEU43(O)</a>   | 1GZWA | [D-A-AA]:71.3° [A-D-DD]:98.3° d_planarity:-83.2°<br>a_planarity:-49.1°, maximum distance exceeded,<br>bad a_angle(sp2), bad d_planarity |               |
| 1GZWA | <a href="#">CYS42(N)</a>  | 4.95 | <a href="#">LEU43(CB)</a>  | 1GZWA |                                                                                                                                         |               |
| 1GZWA | <a href="#">CYS42(CA)</a> | 2.44 | <a href="#">LEU43(N)</a>   | 1GZWA |                                                                                                                                         | C[ ] ... N[ ] |
| 1GZWA | <a href="#">CYS42(CA)</a> | 3.80 | <a href="#">LEU43(CA)</a>  | 1GZWA |                                                                                                                                         | C[ ] ... C[ ] |
| 1GZWA | <a href="#">CYS42(CA)</a> | 4.91 | <a href="#">LEU43(C)</a>   | 1GZWA |                                                                                                                                         |               |
| 1GZWA | <a href="#">CYS42(CA)</a> | 4.53 | <a href="#">LEU43(CB)</a>  | 1GZWA |                                                                                                                                         |               |
| 1GZWA | <a href="#">CYS42(C)</a>  | 2.42 | <a href="#">LEU43(CA)</a>  | 1GZWA |                                                                                                                                         | C[ ] ... C[ ] |
| 1GZWA | <a href="#">CYS42(C)</a>  | 3.71 | <a href="#">LEU43(C)</a>   | 1GZWA |                                                                                                                                         | C[ ] ... C[ ] |
| 1GZWA | <a href="#">CYS42(C)</a>  | 4.40 | <a href="#">LEU43(O)</a>   | 1GZWA |                                                                                                                                         | C[ ] ... O[ ] |
| 1GZWA | <a href="#">CYS42(C)</a>  | 3.18 | <a href="#">LEU43(CB)</a>  | 1GZWA |                                                                                                                                         | C[ ] ... C[ ] |
| 1GZWA | <a href="#">CYS42(C)</a>  | 4.56 | <a href="#">LEU43(CG)</a>  | 1GZWA |                                                                                                                                         |               |
| 1GZWA | <a href="#">CYS42(C)</a>  | 4.76 | <a href="#">LEU43(CD1)</a> | 1GZWA |                                                                                                                                         |               |
| 1GZWA | <a href="#">CYS42(O)</a>  | 2.25 | <a href="#">LEU43(N)</a>   | 1GZWA | [D-A-AA]:30.0° [A-D-DD]:92.6° d_planarity:0.4°<br>a_planarity:0.7°, bad a_angle(sp2)                                                    | O[ ] ... N[ ] |
| 1GZWA | <a href="#">CYS42(O)</a>  | 2.73 | <a href="#">LEU43(CA)</a>  | 1GZWA |                                                                                                                                         | O[ ] ... C[ ] |
| 1GZWA | <a href="#">CYS42(O)</a>  | 4.17 | <a href="#">LEU43(C)</a>   | 1GZWA |                                                                                                                                         | O[ ] ... C[ ] |
| 1GZWA | <a href="#">CYS42(O)</a>  | 3.27 | <a href="#">LEU43(CB)</a>  | 1GZWA |                                                                                                                                         | O[ ] ... C[ ] |
| 1GZWA | <a href="#">CYS42(O)</a>  | 4.41 | <a href="#">LEU43(CG)</a>  | 1GZWA |                                                                                                                                         | O[ ] ... C[ ] |
| 1GZWA | <a href="#">CYS42(O)</a>  | 4.27 | <a href="#">LEU43(CD1)</a> | 1GZWA |                                                                                                                                         | O[ ] ... C[ ] |
| 1GZWA | <a href="#">CYS42(CB)</a> | 3.38 | <a href="#">LEU43(N)</a>   | 1GZWA |                                                                                                                                         | C[ ] ... N[ ] |
| 1GZWA | <a href="#">CYS42(CB)</a> | 4.66 | <a href="#">LEU43(CA)</a>  | 1GZWA |                                                                                                                                         |               |
| 1GZWA | <a href="#">CYS42(CB)</a> | 4.95 | <a href="#">LEU43(CB)</a>  | 1GZWA |                                                                                                                                         |               |
| 1GZWA | <a href="#">CYS42(SG)</a> | 3.59 | <a href="#">LEU43(N)</a>   | 1GZWA | [D-A-AA]:68.7° [A-D-DD]:132.4° d_planarity:87.0°,<br>bad d_planarity                                                                    | S[ ] ... N[ ] |
| 1GZWA | <a href="#">CYS42(SG)</a> | 4.70 | <a href="#">LEU43(CA)</a>  | 1GZWA |                                                                                                                                         |               |

|       |                           |      |                             |       |                                                                                                                                         |
|-------|---------------------------|------|-----------------------------|-------|-----------------------------------------------------------------------------------------------------------------------------------------|
| 1GZWA | <a href="#">CYS42(SG)</a> | 4.60 | <a href="#">LEU43(CB)</a>   | 1GZWA |                                                                                                                                         |
| 1GZWA | <a href="#">CYS42(C)</a>  | 4.43 | <a href="#">HIS44(N)</a>    | 1GZWA | C[ ] ... N[ ]                                                                                                                           |
| 1GZWA | <a href="#">CYS42(O)</a>  | 4.69 | <a href="#">HIS44(N)</a>    | 1GZWA | [D-A-AA]:70.6° [A-D-DD]:172.4° d_planarity:-79.8°<br>a_planarity:24.1°, maximum distance exceeded,<br>bad a_angle(sp2), bad d_planarity |
| 1GZWA | <a href="#">CYS42(C)</a>  | 4.57 | <a href="#">ASN61(O)</a>    | 1GZWA |                                                                                                                                         |
| 1GZWA | <a href="#">CYS42(O)</a>  | 4.40 | <a href="#">ASN61(O)</a>    | 1GZWA | O[ ] ... O[ ]                                                                                                                           |
| 1GZWA | <a href="#">CYS42(CA)</a> | 5.00 | <a href="#">SER62(CB)</a>   | 1GZWA |                                                                                                                                         |
| 1GZWA | <a href="#">CYS42(C)</a>  | 4.74 | <a href="#">SER62(CA)</a>   | 1GZWA |                                                                                                                                         |
| 1GZWA | <a href="#">CYS42(C)</a>  | 4.84 | <a href="#">SER62(CB)</a>   | 1GZWA |                                                                                                                                         |
| 1GZWA | <a href="#">CYS42(O)</a>  | 4.66 | <a href="#">SER62(CA)</a>   | 1GZWA |                                                                                                                                         |
| 1GZWA | <a href="#">CYS42(O)</a>  | 4.58 | <a href="#">SER62(CB)</a>   | 1GZWA |                                                                                                                                         |
| 1GZWA | <a href="#">CYS42(CA)</a> | 4.69 | <a href="#">LEU96(CD1)</a>  | 1GZWA |                                                                                                                                         |
| 1GZWA | <a href="#">CYS42(C)</a>  | 4.22 | <a href="#">LEU96(CD1)</a>  | 1GZWA | C[ ] ... C[ ]                                                                                                                           |
| 1GZWA | <a href="#">CYS42(C)</a>  | 4.91 | <a href="#">LEU96(CD2)</a>  | 1GZWA |                                                                                                                                         |
| 1GZWA | <a href="#">CYS42(O)</a>  | 4.79 | <a href="#">LEU96(CG)</a>   | 1GZWA |                                                                                                                                         |
| 1GZWA | <a href="#">CYS42(O)</a>  | 3.61 | <a href="#">LEU96(CD1)</a>  | 1GZWA | O[ ] ... C[ ]                                                                                                                           |
| 1GZWA | <a href="#">CYS42(O)</a>  | 4.75 | <a href="#">LEU96(CD2)</a>  | 1GZWA |                                                                                                                                         |
| 1GZWA | <a href="#">CYS42(CB)</a> | 4.91 | <a href="#">LEU96(CG)</a>   | 1GZWA |                                                                                                                                         |
| 1GZWA | <a href="#">CYS42(CB)</a> | 4.00 | <a href="#">LEU96(CD1)</a>  | 1GZWA | C[ ] ... C[ ]                                                                                                                           |
| 1GZWA | <a href="#">CYS42(CB)</a> | 4.71 | <a href="#">LEU96(CD2)</a>  | 1GZWA |                                                                                                                                         |
| 1GZWA | <a href="#">CYS42(SG)</a> | 4.64 | <a href="#">LEU96(CG)</a>   | 1GZWA |                                                                                                                                         |
| 1GZWA | <a href="#">CYS42(SG)</a> | 4.27 | <a href="#">LEU96(CD1)</a>  | 1GZWA | S[ ] ... C[ ]                                                                                                                           |
| 1GZWA | <a href="#">CYS42(SG)</a> | 3.95 | <a href="#">LEU96(CD2)</a>  | 1GZWA | S[ ] ... C[ ]                                                                                                                           |
| 1GZWA | <a href="#">CYS42(C)</a>  | 4.62 | <a href="#">PHE108(CD2)</a> | 1GZWA |                                                                                                                                         |
| 1GZWA | <a href="#">CYS42(C)</a>  | 4.55 | <a href="#">PHE108(CE2)</a> | 1GZWA |                                                                                                                                         |
| 1GZWA | <a href="#">CYS42(O)</a>  | 4.73 | <a href="#">PHE108(CG)</a>  | 1GZWA |                                                                                                                                         |
| 1GZWA | <a href="#">CYS42(O)</a>  | 3.44 | <a href="#">PHE108(CD2)</a> | 1GZWA | O[ ] ... C[ ]                                                                                                                           |
| 1GZWA | <a href="#">CYS42(O)</a>  | 3.50 | <a href="#">PHE108(CE2)</a> | 1GZWA | O[ ] ... C[ ]                                                                                                                           |
| 1GZWA | <a href="#">CYS42(O)</a>  | 4.82 | <a href="#">PHE108(CZ)</a>  | 1GZWA |                                                                                                                                         |
| 1GZWA | <a href="#">CYS42(O)</a>  | 4.46 | <a href="#">PRO109(O)</a>   | 1GZWA | O[ ] ... O[ ]                                                                                                                           |
| 1GZWA | <a href="#">CYS42(CB)</a> | 4.11 | <a href="#">ASN110(OD1)</a> | 1GZWA | C[ ] ... O[ ]                                                                                                                           |
| 1GZWA | <a href="#">CYS42(N)</a>  | 4.28 | <a href="#">LEU112(CD2)</a> | 1GZWA | N[ ] ... C[ ]                                                                                                                           |
| 1GZWA | <a href="#">CYS42(CA)</a> | 4.74 | <a href="#">LEU112(CD1)</a> | 1GZWA |                                                                                                                                         |
| 1GZWA | <a href="#">CYS42(CA)</a> | 4.62 | <a href="#">LEU112(CD2)</a> | 1GZWA |                                                                                                                                         |
| 1GZWA | <a href="#">CYS42(N)</a>  | 4.38 | <a href="#">LEU114(CD2)</a> | 1GZWA | N[ ] ... C[ ]                                                                                                                           |
| 1GZWA | <a href="#">CYS42(CA)</a> | 4.54 | <a href="#">LEU114(CD2)</a> | 1GZWA |                                                                                                                                         |
| 1GZWA | <a href="#">CYS42(CB)</a> | 4.81 | <a href="#">LEU114(CB)</a>  | 1GZWA |                                                                                                                                         |
| 1GZWA | <a href="#">CYS42(CB)</a> | 4.75 | <a href="#">LEU114(CG)</a>  | 1GZWA |                                                                                                                                         |
| 1GZWA | <a href="#">CYS42(CB)</a> | 3.63 | <a href="#">LEU114(CD2)</a> | 1GZWA | C[ ] ... C[ ]                                                                                                                           |
| 1GZWA | <a href="#">CYS42(SG)</a> | 3.76 | <a href="#">LEU114(CD2)</a> | 1GZWA | S[ ] ... C[ ]                                                                                                                           |
| 1GZWA | <a href="#">CYS42(SG)</a> | 4.92 | <a href="#">ILE117(CB)</a>  | 1GZWA |                                                                                                                                         |
| 1GZWA | <a href="#">CYS42(SG)</a> | 3.79 | <a href="#">ILE117(CG1)</a> | 1GZWA | S[ ] ... C[ ]                                                                                                                           |
| 1GZWA | <a href="#">CYS42(SG)</a> | 4.89 | <a href="#">ILE117(CG2)</a> | 1GZWA |                                                                                                                                         |
| 1GZWA | <a href="#">CYS42(SG)</a> | 3.69 | <a href="#">ILE117(CD1)</a> | 1GZWA | S[ ] ... C[ ]                                                                                                                           |

| chain1 | res1/atm1 | distance | res2/atm2 | chain2 | H-bonding | Charge interaction |
|--------|-----------|----------|-----------|--------|-----------|--------------------|
|--------|-----------|----------|-----------|--------|-----------|--------------------|

|       |                           |      |                            |       |                                                                                                                                        |               |
|-------|---------------------------|------|----------------------------|-------|----------------------------------------------------------------------------------------------------------------------------------------|---------------|
| 1GZWA | <a href="#">CYS60(CA)</a> | 4.94 | <a href="#">LEU43(CD1)</a> | 1GZWA |                                                                                                                                        |               |
| 1GZWA | <a href="#">CYS60(CB)</a> | 4.11 | <a href="#">LEU43(CD1)</a> | 1GZWA |                                                                                                                                        | C[ ] ... C[ ] |
| 1GZWA | <a href="#">CYS60(SG)</a> | 4.04 | <a href="#">LEU43(CD1)</a> | 1GZWA |                                                                                                                                        | S[ ] ... C[ ] |
| 1GZWA | <a href="#">CYS60(N)</a>  | 4.16 | <a href="#">HIS44(O)</a>   | 1GZWA | [D-A-AA]:164.2° [A-D-DD]:37.8° d_planarity:11.0°<br>a_planarity:4.5°, maximum distance exceeded,<br>bad d_angle(sp2)                   | N[ ] ... O[ ] |
| 1GZWA | <a href="#">CYS60(CA)</a> | 4.34 | <a href="#">HIS44(C)</a>   | 1GZWA |                                                                                                                                        | C[ ] ... C[ ] |
| 1GZWA | <a href="#">CYS60(CA)</a> | 3.13 | <a href="#">HIS44(O)</a>   | 1GZWA |                                                                                                                                        | C[ ] ... O[ ] |
| 1GZWA | <a href="#">CYS60(C)</a>  | 4.77 | <a href="#">HIS44(C)</a>   | 1GZWA |                                                                                                                                        |               |
| 1GZWA | <a href="#">CYS60(C)</a>  | 3.60 | <a href="#">HIS44(O)</a>   | 1GZWA |                                                                                                                                        | C[ ] ... O[ ] |
| 1GZWA | <a href="#">CYS60(O)</a>  | 4.80 | <a href="#">HIS44(O)</a>   | 1GZWA |                                                                                                                                        |               |
| 1GZWA | <a href="#">CYS60(CB)</a> | 4.86 | <a href="#">HIS44(C)</a>   | 1GZWA |                                                                                                                                        |               |
| 1GZWA | <a href="#">CYS60(CB)</a> | 3.82 | <a href="#">HIS44(O)</a>   | 1GZWA |                                                                                                                                        | C[ ] ... O[ ] |
| 1GZWA | <a href="#">CYS60(SG)</a> | 4.95 | <a href="#">HIS44(C)</a>   | 1GZWA | Weakly positive                                                                                                                        |               |
| 1GZWA | <a href="#">CYS60(SG)</a> | 4.17 | <a href="#">HIS44(O)</a>   | 1GZWA |                                                                                                                                        | S[ ] ... O[ ] |
| 1GZWA | <a href="#">CYS60(CA)</a> | 4.92 | <a href="#">PHE45(CA)</a>  | 1GZWA |                                                                                                                                        |               |
| 1GZWA | <a href="#">CYS60(SG)</a> | 4.35 | <a href="#">PHE45(CA)</a>  | 1GZWA |                                                                                                                                        | S[ ] ... C[ ] |
| 1GZWA | <a href="#">CYS60(SG)</a> | 4.86 | <a href="#">PHE45(CB)</a>  | 1GZWA |                                                                                                                                        |               |
| 1GZWA | <a href="#">CYS60(SG)</a> | 4.76 | <a href="#">PHE45(CG)</a>  | 1GZWA |                                                                                                                                        |               |
| 1GZWA | <a href="#">CYS60(SG)</a> | 3.83 | <a href="#">PHE45(CD1)</a> | 1GZWA |                                                                                                                                        | S[ ] ... C[ ] |
| 1GZWA | <a href="#">CYS60(SG)</a> | 4.45 | <a href="#">PHE45(CE1)</a> | 1GZWA |                                                                                                                                        | S[ ] ... C[ ] |
| 1GZWA | <a href="#">CYS60(N)</a>  | 4.92 | <a href="#">ASN46(N)</a>   | 1GZWA |                                                                                                                                        |               |
| 1GZWA | <a href="#">CYS60(CA)</a> | 4.90 | <a href="#">ASN46(N)</a>   | 1GZWA |                                                                                                                                        |               |
| 1GZWA | <a href="#">CYS60(SG)</a> | 4.99 | <a href="#">ASN46(N)</a>   | 1GZWA | [D-A-AA]:100.4° [A-D-DD]:143.7° d_planarity:-15.3°<br>maximum distance exceeded                                                        |               |
| 1GZWA | <a href="#">CYS60(N)</a>  | 4.15 | <a href="#">ILE58(C)</a>   | 1GZWA |                                                                                                                                        | N[ ] ... C[ ] |
| 1GZWA | <a href="#">CYS60(N)</a>  | 4.14 | <a href="#">ILE58(O)</a>   | 1GZWA | [D-A-AA]:81.6° [A-D-DD]:146.9° d_planarity:88.2°<br>a_planarity:30.0°, maximum distance exceeded,<br>bad a_angle(sp2), bad d_planarity | N[ ] ... O[ ] |
| 1GZWA | <a href="#">CYS60(SG)</a> | 4.09 | <a href="#">ILE58(CG2)</a> | 1GZWA |                                                                                                                                        | S[ ] ... C[ ] |
| 1GZWA | <a href="#">CYS60(N)</a>  | 3.47 | <a href="#">VAL59(N)</a>   | 1GZWA |                                                                                                                                        | N[ ] ... N[ ] |
| 1GZWA | <a href="#">CYS60(N)</a>  | 2.43 | <a href="#">VAL59(CA)</a>  | 1GZWA |                                                                                                                                        | N[ ] ... C[ ] |
| 1GZWA | <a href="#">CYS60(N)</a>  | 2.25 | <a href="#">VAL59(O)</a>   | 1GZWA | [D-A-AA]:29.7° [A-D-DD]:94.4° d_planarity:1.1°<br>a_planarity:1.2°, bad a_angle(sp2)                                                   | N[ ] ... O[ ] |
| 1GZWA | <a href="#">CYS60(N)</a>  | 3.39 | <a href="#">VAL59(CB)</a>  | 1GZWA |                                                                                                                                        | N[ ] ... C[ ] |
| 1GZWA | <a href="#">CYS60(N)</a>  | 3.30 | <a href="#">VAL59(CG1)</a> | 1GZWA |                                                                                                                                        | N[ ] ... C[ ] |
| 1GZWA | <a href="#">CYS60(N)</a>  | 4.68 | <a href="#">VAL59(CG2)</a> | 1GZWA |                                                                                                                                        |               |
| 1GZWA | <a href="#">CYS60(CA)</a> | 4.71 | <a href="#">VAL59(N)</a>   | 1GZWA |                                                                                                                                        |               |
| 1GZWA | <a href="#">CYS60(CA)</a> | 3.81 | <a href="#">VAL59(CA)</a>  | 1GZWA |                                                                                                                                        | C[ ] ... C[ ] |
| 1GZWA | <a href="#">CYS60(CA)</a> | 2.44 | <a href="#">VAL59(C)</a>   | 1GZWA |                                                                                                                                        | C[ ] ... C[ ] |
| 1GZWA | <a href="#">CYS60(CA)</a> | 2.78 | <a href="#">VAL59(O)</a>   | 1GZWA |                                                                                                                                        | C[ ] ... O[ ] |
| 1GZWA | <a href="#">CYS60(CA)</a> | 4.64 | <a href="#">VAL59(CB)</a>  | 1GZWA |                                                                                                                                        |               |
| 1GZWA | <a href="#">CYS60(CA)</a> | 4.36 | <a href="#">VAL59(CG1)</a> | 1GZWA |                                                                                                                                        | C[ ] ... C[ ] |
| 1GZWA | <a href="#">CYS60(C)</a>  | 4.69 | <a href="#">VAL59(CA)</a>  | 1GZWA |                                                                                                                                        |               |
| 1GZWA | <a href="#">CYS60(C)</a>  | 3.49 | <a href="#">VAL59(C)</a>   | 1GZWA |                                                                                                                                        | C[ ] ... C[ ] |
| 1GZWA | <a href="#">CYS60(C)</a>  | 3.90 | <a href="#">VAL59(O)</a>   | 1GZWA |                                                                                                                                        | C[ ] ... O[ ] |
| 1GZWA | <a href="#">CYS60(C)</a>  | 4.45 | <a href="#">VAL59(CG1)</a> | 1GZWA |                                                                                                                                        | C[ ] ... C[ ] |
| 1GZWA | <a href="#">CYS60(O)</a>  | 4.76 | <a href="#">VAL59(CA)</a>  | 1GZWA |                                                                                                                                        |               |
| 1GZWA | <a href="#">CYS60(O)</a>  | 3.88 | <a href="#">VAL59(C)</a>   | 1GZWA |                                                                                                                                        | O[ ] ... C[ ] |
| 1GZWA | <a href="#">CYS60(O)</a>  | 4.57 | <a href="#">VAL59(O)</a>   | 1GZWA |                                                                                                                                        |               |
| 1GZWA | <a href="#">CYS60(O)</a>  | 4.21 | <a href="#">VAL59(CG1)</a> | 1GZWA |                                                                                                                                        | O[ ] ... C[ ] |

|       |                           |      |                            |       |                                                                                                                                     |                 |
|-------|---------------------------|------|----------------------------|-------|-------------------------------------------------------------------------------------------------------------------------------------|-----------------|
| 1GZWA | <a href="#">CYS60(CB)</a> | 4.72 | <a href="#">VAL59(CA)</a>  | 1GZWA |                                                                                                                                     |                 |
| 1GZWA | <a href="#">CYS60(CB)</a> | 3.48 | <a href="#">VAL59(C)</a>   | 1GZWA |                                                                                                                                     | C [ ] ... C [ ] |
| 1GZWA | <a href="#">CYS60(CB)</a> | 3.83 | <a href="#">VAL59(O)</a>   | 1GZWA |                                                                                                                                     | C [ ] ... O [ ] |
| 1GZWA | <a href="#">CYS60(SG)</a> | 4.94 | <a href="#">VAL59(CA)</a>  | 1GZWA |                                                                                                                                     |                 |
| 1GZWA | <a href="#">CYS60(SG)</a> | 3.81 | <a href="#">VAL59(C)</a>   | 1GZWA |                                                                                                                                     | S [ ] ... C [ ] |
| 1GZWA | <a href="#">CYS60(SG)</a> | 3.86 | <a href="#">VAL59(O)</a>   | 1GZWA |                                                                                                                                     | S [ ] ... O [ ] |
| 1GZWA | <a href="#">CYS60(N)</a>  | 3.58 | <a href="#">ASN61(N)</a>   | 1GZWA |                                                                                                                                     | N [ ] ... N [ ] |
| 1GZWA | <a href="#">CYS60(N)</a>  | 4.78 | <a href="#">ASN61(CA)</a>  | 1GZWA |                                                                                                                                     |                 |
| 1GZWA | <a href="#">CYS60(CA)</a> | 2.42 | <a href="#">ASN61(N)</a>   | 1GZWA |                                                                                                                                     | C [ ] ... N [ ] |
| 1GZWA | <a href="#">CYS60(CA)</a> | 3.77 | <a href="#">ASN61(CA)</a>  | 1GZWA |                                                                                                                                     | C [ ] ... C [ ] |
| 1GZWA | <a href="#">CYS60(CA)</a> | 4.79 | <a href="#">ASN61(C)</a>   | 1GZWA |                                                                                                                                     |                 |
| 1GZWA | <a href="#">CYS60(CA)</a> | 4.76 | <a href="#">ASN61(O)</a>   | 1GZWA |                                                                                                                                     |                 |
| 1GZWA | <a href="#">CYS60(CA)</a> | 4.47 | <a href="#">ASN61(CB)</a>  | 1GZWA |                                                                                                                                     | C [ ] ... C [ ] |
| 1GZWA | <a href="#">CYS60(C)</a>  | 2.40 | <a href="#">ASN61(CA)</a>  | 1GZWA |                                                                                                                                     | C [ ] ... C [ ] |
| 1GZWA | <a href="#">CYS60(C)</a>  | 3.63 | <a href="#">ASN61(C)</a>   | 1GZWA |                                                                                                                                     | C [ ] ... C [ ] |
| 1GZWA | <a href="#">CYS60(C)</a>  | 3.94 | <a href="#">ASN61(O)</a>   | 1GZWA |                                                                                                                                     | C [ ] ... O [ ] |
| 1GZWA | <a href="#">CYS60(C)</a>  | 3.13 | <a href="#">ASN61(CB)</a>  | 1GZWA |                                                                                                                                     | C [ ] ... C [ ] |
| 1GZWA | <a href="#">CYS60(C)</a>  | 4.32 | <a href="#">ASN61(CG)</a>  | 1GZWA |                                                                                                                                     | C [ ] ... C [ ] |
| 1GZWA | <a href="#">CYS60(C)</a>  | 4.69 | <a href="#">ASN61(ND2)</a> | 1GZWA |                                                                                                                                     |                 |
| 1GZWA | <a href="#">CYS60(O)</a>  | 2.24 | <a href="#">ASN61(N)</a>   | 1GZWA | [D-A-AA]:29.9° [A-D-DD]:92.0° d_planarity:0.4°<br>a_planarity:0.1°, <b>bad a_angle(sp2)</b>                                         | O [ ] ... N [ ] |
| 1GZWA | <a href="#">CYS60(O)</a>  | 2.71 | <a href="#">ASN61(CA)</a>  | 1GZWA |                                                                                                                                     | O [ ] ... C [ ] |
| 1GZWA | <a href="#">CYS60(O)</a>  | 4.14 | <a href="#">ASN61(C)</a>   | 1GZWA |                                                                                                                                     | O [ ] ... C [ ] |
| 1GZWA | <a href="#">CYS60(O)</a>  | 4.73 | <a href="#">ASN61(O)</a>   | 1GZWA |                                                                                                                                     |                 |
| 1GZWA | <a href="#">CYS60(O)</a>  | 3.20 | <a href="#">ASN61(CB)</a>  | 1GZWA |                                                                                                                                     | O [ ] ... C [ ] |
| 1GZWA | <a href="#">CYS60(O)</a>  | 4.02 | <a href="#">ASN61(CG)</a>  | 1GZWA |                                                                                                                                     | O [ ] ... C [ ] |
| 1GZWA | <a href="#">CYS60(O)</a>  | 4.83 | <a href="#">ASN61(OD1)</a> | 1GZWA |                                                                                                                                     |                 |
| 1GZWA | <a href="#">CYS60(O)</a>  | 4.32 | <a href="#">ASN61(ND2)</a> | 1GZWA | [D-A-AA]:99.9° [A-D-DD]:68.3° d_planarity:-43.9°<br>a_planarity:2.8°, <b>maximum distance exceeded,</b><br><b>bad d_angle(sp2)</b>  | O [ ] ... N [ ] |
| 1GZWA | <a href="#">CYS60(CB)</a> | 3.21 | <a href="#">ASN61(N)</a>   | 1GZWA |                                                                                                                                     | C [ ] ... N [ ] |
| 1GZWA | <a href="#">CYS60(CB)</a> | 4.48 | <a href="#">ASN61(CA)</a>  | 1GZWA |                                                                                                                                     | C [ ] ... C [ ] |
| 1GZWA | <a href="#">CYS60(SG)</a> | 4.74 | <a href="#">ASN61(N)</a>   | 1GZWA | [D-A-AA]:26.0° [A-D-DD]:157.8° d_planarity:69.9°,<br><b>maximum distance exceeded, bad a_angle(sp3),</b><br><b>bad d_planarity</b>  |                 |
| 1GZWA | <a href="#">CYS60(C)</a>  | 4.72 | <a href="#">SER62(N)</a>   | 1GZWA |                                                                                                                                     |                 |
| 1GZWA | <a href="#">CYS60(O)</a>  | 4.99 | <a href="#">SER62(N)</a>   | 1GZWA | [D-A-AA]:70.4° [A-D-DD]:162.8° d_planarity:34.1°<br>a_planarity:9.9°, <b>maximum distance exceeded,</b><br><b>bad a_angle(sp2)</b>  |                 |
| 1GZWA | <a href="#">CYS60(O)</a>  | 4.86 | <a href="#">THR70(C)</a>   | 1GZWA |                                                                                                                                     |                 |
| 1GZWA | <a href="#">CYS60(O)</a>  | 4.34 | <a href="#">THR70(O)</a>   | 1GZWA |                                                                                                                                     | O [ ] ... O [ ] |
| 1GZWA | <a href="#">CYS60(C)</a>  | 4.56 | <a href="#">GLU71(CA)</a>  | 1GZWA |                                                                                                                                     |                 |
| 1GZWA | <a href="#">CYS60(C)</a>  | 4.82 | <a href="#">GLU71(C)</a>   | 1GZWA |                                                                                                                                     |                 |
| 1GZWA | <a href="#">CYS60(C)</a>  | 5.00 | <a href="#">GLU71(CB)</a>  | 1GZWA |                                                                                                                                     |                 |
| 1GZWA | <a href="#">CYS60(O)</a>  | 4.54 | <a href="#">GLU71(N)</a>   | 1GZWA | [D-A-AA]:150.2° [A-D-DD]:31.4° d_planarity:40.3°<br>a_planarity:19.3°, <b>maximum distance exceeded,</b><br><b>bad d_angle(sp2)</b> |                 |
| 1GZWA | <a href="#">CYS60(O)</a>  | 3.38 | <a href="#">GLU71(CA)</a>  | 1GZWA |                                                                                                                                     | O [ ] ... C [ ] |
| 1GZWA | <a href="#">CYS60(O)</a>  | 3.59 | <a href="#">GLU71(C)</a>   | 1GZWA |                                                                                                                                     | O [ ] ... C [ ] |
| 1GZWA | <a href="#">CYS60(O)</a>  | 4.79 | <a href="#">GLU71(O)</a>   | 1GZWA |                                                                                                                                     |                 |
| 1GZWA | <a href="#">CYS60(O)</a>  | 3.93 | <a href="#">GLU71(CB)</a>  | 1GZWA |                                                                                                                                     | O [ ] ... C [ ] |
| 1GZWA | <a href="#">CYS60(O)</a>  | 4.50 | <a href="#">GLU71(CG)</a>  | 1GZWA |                                                                                                                                     |                 |

|       |                           |      |                             |       |                                                                                         |               |
|-------|---------------------------|------|-----------------------------|-------|-----------------------------------------------------------------------------------------|---------------|
| 1GZWA | <a href="#">CYS60(N)</a>  | 4.31 | <a href="#">GLN72(N)</a>    | 1GZWA |                                                                                         | N[ ] ... N[ ] |
| 1GZWA | <a href="#">CYS60(N)</a>  | 4.68 | <a href="#">GLN72(CA)</a>   | 1GZWA |                                                                                         |               |
| 1GZWA | <a href="#">CYS60(N)</a>  | 3.99 | <a href="#">GLN72(C)</a>    | 1GZWA |                                                                                         | N[ ] ... C[ ] |
| 1GZWA | <a href="#">CYS60(N)</a>  | 2.82 | <a href="#">GLN72(O)</a>    | 1GZWA | <b>H-bond</b> [D-A-AA]:158.8° [A-D-DD]:122.2° d_planarity:-5.7°<br>a_planarity:-30.8°   | N[ ] ... O[ ] |
| 1GZWA | <a href="#">CYS60(N)</a>  | 4.91 | <a href="#">GLN72(CB)</a>   | 1GZWA |                                                                                         |               |
| 1GZWA | <a href="#">CYS60(CA)</a> | 4.67 | <a href="#">GLN72(N)</a>    | 1GZWA |                                                                                         |               |
| 1GZWA | <a href="#">CYS60(CA)</a> | 4.81 | <a href="#">GLN72(C)</a>    | 1GZWA |                                                                                         |               |
| 1GZWA | <a href="#">CYS60(CA)</a> | 3.80 | <a href="#">GLN72(O)</a>    | 1GZWA |                                                                                         | C[ ] ... O[ ] |
| 1GZWA | <a href="#">CYS60(C)</a>  | 4.01 | <a href="#">GLN72(N)</a>    | 1GZWA |                                                                                         | C[ ] ... N[ ] |
| 1GZWA | <a href="#">CYS60(C)</a>  | 4.81 | <a href="#">GLN72(CA)</a>   | 1GZWA |                                                                                         |               |
| 1GZWA | <a href="#">CYS60(C)</a>  | 4.89 | <a href="#">GLN72(C)</a>    | 1GZWA |                                                                                         |               |
| 1GZWA | <a href="#">CYS60(C)</a>  | 4.08 | <a href="#">GLN72(O)</a>    | 1GZWA |                                                                                         | C[ ] ... O[ ] |
| 1GZWA | <a href="#">CYS60(C)</a>  | 4.74 | <a href="#">GLN72(CB)</a>   | 1GZWA |                                                                                         |               |
| 1GZWA | <a href="#">CYS60(O)</a>  | 2.85 | <a href="#">GLN72(N)</a>    | 1GZWA | <b>H-bond</b> [D-A-AA]:156.3° [A-D-DD]:122.1° d_planarity:-<br>15.5° a_planarity:-31.4° | O[ ] ... N[ ] |
| 1GZWA | <a href="#">CYS60(O)</a>  | 3.83 | <a href="#">GLN72(CA)</a>   | 1GZWA |                                                                                         | O[ ] ... C[ ] |
| 1GZWA | <a href="#">CYS60(O)</a>  | 4.10 | <a href="#">GLN72(C)</a>    | 1GZWA |                                                                                         | O[ ] ... C[ ] |
| 1GZWA | <a href="#">CYS60(O)</a>  | 3.47 | <a href="#">GLN72(O)</a>    | 1GZWA |                                                                                         | O[ ] ... O[ ] |
| 1GZWA | <a href="#">CYS60(O)</a>  | 3.97 | <a href="#">GLN72(CB)</a>   | 1GZWA |                                                                                         | O[ ] ... C[ ] |
| 1GZWA | <a href="#">CYS60(CB)</a> | 5.00 | <a href="#">GLN72(N)</a>    | 1GZWA |                                                                                         |               |
| 1GZWA | <a href="#">CYS60(CB)</a> | 4.85 | <a href="#">GLN72(C)</a>    | 1GZWA |                                                                                         |               |
| 1GZWA | <a href="#">CYS60(CB)</a> | 4.05 | <a href="#">GLN72(O)</a>    | 1GZWA |                                                                                         | C[ ] ... O[ ] |
| 1GZWA | <a href="#">CYS60(CB)</a> | 4.56 | <a href="#">GLN72(CB)</a>   | 1GZWA |                                                                                         |               |
| 1GZWA | <a href="#">CYS60(SG)</a> | 4.97 | <a href="#">GLN72(O)</a>    | 1GZWA |                                                                                         |               |
| 1GZWA | <a href="#">CYS60(SG)</a> | 4.90 | <a href="#">GLU74(OE2)</a>  | 1GZWA | Negative                                                                                |               |
| 1GZWA | <a href="#">CYS60(CB)</a> | 4.84 | <a href="#">PHE106(CE2)</a> | 1GZWA |                                                                                         |               |
| 1GZWA | <a href="#">CYS60(SG)</a> | 3.75 | <a href="#">PHE106(CE2)</a> | 1GZWA |                                                                                         | S[ ] ... C[ ] |
| 1GZWA | <a href="#">CYS60(SG)</a> | 3.84 | <a href="#">PHE106(CZ)</a>  | 1GZWA |                                                                                         | S[ ] ... C[ ] |
| 1GZWA | <a href="#">CYS60(CA)</a> | 4.64 | <a href="#">PHE108(CE1)</a> | 1GZWA |                                                                                         |               |
| 1GZWA | <a href="#">CYS60(C)</a>  | 4.72 | <a href="#">PHE108(CD1)</a> | 1GZWA |                                                                                         |               |
| 1GZWA | <a href="#">CYS60(C)</a>  | 3.94 | <a href="#">PHE108(CE1)</a> | 1GZWA |                                                                                         | C[ ] ... C[ ] |
| 1GZWA | <a href="#">CYS60(C)</a>  | 4.96 | <a href="#">PHE108(CE2)</a> | 1GZWA |                                                                                         |               |
| 1GZWA | <a href="#">CYS60(C)</a>  | 4.09 | <a href="#">PHE108(CZ)</a>  | 1GZWA |                                                                                         | C[ ] ... C[ ] |
| 1GZWA | <a href="#">CYS60(O)</a>  | 4.82 | <a href="#">PHE108(CD1)</a> | 1GZWA |                                                                                         |               |
| 1GZWA | <a href="#">CYS60(O)</a>  | 3.88 | <a href="#">PHE108(CE1)</a> | 1GZWA |                                                                                         | O[ ] ... C[ ] |
| 1GZWA | <a href="#">CYS60(O)</a>  | 4.19 | <a href="#">PHE108(CZ)</a>  | 1GZWA |                                                                                         | O[ ] ... C[ ] |
| 1GZWA | <a href="#">CYS60(CB)</a> | 4.56 | <a href="#">PHE108(CG)</a>  | 1GZWA |                                                                                         |               |
| 1GZWA | <a href="#">CYS60(CB)</a> | 3.95 | <a href="#">PHE108(CD1)</a> | 1GZWA |                                                                                         | C[ ] ... C[ ] |
| 1GZWA | <a href="#">CYS60(CB)</a> | 3.96 | <a href="#">PHE108(CE1)</a> | 1GZWA |                                                                                         | C[ ] ... C[ ] |
| 1GZWA | <a href="#">CYS60(CB)</a> | 4.58 | <a href="#">PHE108(CZ)</a>  | 1GZWA |                                                                                         |               |

| chain1 | res1/atm1                 | distance | res2/atm2                | chain2 | H-bonding                                                                                                           | Charge interaction |
|--------|---------------------------|----------|--------------------------|--------|---------------------------------------------------------------------------------------------------------------------|--------------------|
| 1W60A  | <a href="#">CYS81(N)</a>  | 4.90     | <a href="#">LYS77(C)</a> | 1W60A  |                                                                                                                     |                    |
| 1W60A  | <a href="#">CYS81(N)</a>  | 3.97     | <a href="#">LYS77(O)</a> | 1W60A  | [D-A-AA]:133.0° [A-D-DD]:122.3° d_planarity:-62.3°<br>a_planarity:54.3°, maximum distance exceeded, bad d_planarity | N[ ] ... O[ ]      |
| 1W60A  | <a href="#">CYS81(CA)</a> | 4.91     | <a href="#">LYS77(O)</a> | 1W60A  |                                                                                                                     |                    |

|       |                            |      |                            |       |                                                                                                                       |                 |
|-------|----------------------------|------|----------------------------|-------|-----------------------------------------------------------------------------------------------------------------------|-----------------|
| 1W60A | <a href="#">CYS81</a> (CB) | 4.69 | <a href="#">LYS77</a> (O)  | 1W60A |                                                                                                                       |                 |
| 1W60A | <a href="#">CYS81</a> (SG) | 4.46 | <a href="#">LYS77</a> (C)  | 1W60A |                                                                                                                       | S [ ] ... C [ ] |
| 1W60A | <a href="#">CYS81</a> (SG) | 3.43 | <a href="#">LYS77</a> (O)  | 1W60A | Weakly positive                                                                                                       | S [ ] ... O [ ] |
| 1W60A | <a href="#">CYS81</a> (N)  | 4.75 | <a href="#">ILE78</a> (CA) | 1W60A |                                                                                                                       |                 |
| 1W60A | <a href="#">CYS81</a> (N)  | 3.72 | <a href="#">ILE78</a> (C)  | 1W60A |                                                                                                                       | N [ ] ... C [ ] |
| 1W60A | <a href="#">CYS81</a> (N)  | 2.97 | <a href="#">ILE78</a> (O)  | 1W60A | <b>H-bond</b> [D-A-AA]:118.2° [A-D-DD]:102.2° d_planarity:-0.6°<br>a_planarity:70.9°                                  | N [ ] ... O [ ] |
| 1W60A | <a href="#">CYS81</a> (CA) | 4.59 | <a href="#">ILE78</a> (C)  | 1W60A |                                                                                                                       |                 |
| 1W60A | <a href="#">CYS81</a> (CA) | 3.58 | <a href="#">ILE78</a> (O)  | 1W60A |                                                                                                                       | C [ ] ... O [ ] |
| 1W60A | <a href="#">CYS81</a> (C)  | 4.18 | <a href="#">ILE78</a> (O)  | 1W60A |                                                                                                                       | C [ ] ... O [ ] |
| 1W60A | <a href="#">CYS81</a> (CB) | 4.89 | <a href="#">ILE78</a> (CA) | 1W60A |                                                                                                                       |                 |
| 1W60A | <a href="#">CYS81</a> (CB) | 4.28 | <a href="#">ILE78</a> (C)  | 1W60A |                                                                                                                       | C [ ] ... C [ ] |
| 1W60A | <a href="#">CYS81</a> (CB) | 3.21 | <a href="#">ILE78</a> (O)  | 1W60A |                                                                                                                       | C [ ] ... O [ ] |
| 1W60A | <a href="#">CYS81</a> (SG) | 4.79 | <a href="#">ILE78</a> (N)  | 1W60A | [D-A-AA]:115.8° [A-D-DD]:54.3° d_planarity:9.6°, <b>maximum distance exceeded, bad d_angle(sp2)</b>                   |                 |
| 1W60A | <a href="#">CYS81</a> (SG) | 4.11 | <a href="#">ILE78</a> (CA) | 1W60A |                                                                                                                       | S [ ] ... C [ ] |
| 1W60A | <a href="#">CYS81</a> (SG) | 4.03 | <a href="#">ILE78</a> (C)  | 1W60A |                                                                                                                       | S [ ] ... C [ ] |
| 1W60A | <a href="#">CYS81</a> (SG) | 3.38 | <a href="#">ILE78</a> (O)  | 1W60A |                                                                                                                       | S [ ] ... O [ ] |
| 1W60A | <a href="#">CYS81</a> (N)  | 4.18 | <a href="#">LEU79</a> (N)  | 1W60A |                                                                                                                       | N [ ] ... N [ ] |
| 1W60A | <a href="#">CYS81</a> (N)  | 4.04 | <a href="#">LEU79</a> (CA) | 1W60A |                                                                                                                       | N [ ] ... C [ ] |
| 1W60A | <a href="#">CYS81</a> (N)  | 3.13 | <a href="#">LEU79</a> (C)  | 1W60A |                                                                                                                       | N [ ] ... C [ ] |
| 1W60A | <a href="#">CYS81</a> (N)  | 3.47 | <a href="#">LEU79</a> (O)  | 1W60A | [D-A-AA]:63.6° [A-D-DD]:134.1° d_planarity:-86.1°<br>a_planarity:54.7°, <b>bad a_angle(sp2), bad d_planarity</b>      | N [ ] ... O [ ] |
| 1W60A | <a href="#">CYS81</a> (CA) | 4.41 | <a href="#">LEU79</a> (C)  | 1W60A |                                                                                                                       | C [ ] ... C [ ] |
| 1W60A | <a href="#">CYS81</a> (CA) | 4.61 | <a href="#">LEU79</a> (O)  | 1W60A |                                                                                                                       |                 |
| 1W60A | <a href="#">CYS81</a> (C)  | 4.70 | <a href="#">LEU79</a> (C)  | 1W60A |                                                                                                                       |                 |
| 1W60A | <a href="#">CYS81</a> (C)  | 4.56 | <a href="#">LEU79</a> (O)  | 1W60A |                                                                                                                       |                 |
| 1W60A | <a href="#">CYS81</a> (N)  | 2.65 | <a href="#">LYS80</a> (N)  | 1W60A |                                                                                                                       | N [ ] ... N [ ] |
| 1W60A | <a href="#">CYS81</a> (N)  | 2.43 | <a href="#">LYS80</a> (CA) | 1W60A |                                                                                                                       | N [ ] ... C [ ] |
| 1W60A | <a href="#">CYS81</a> (N)  | 2.25 | <a href="#">LYS80</a> (O)  | 1W60A | [D-A-AA]:29.7° [A-D-DD]:94.5° d_planarity:0.8°<br>a_planarity:0.3°, <b>bad a_angle(sp2)</b>                           | N [ ] ... O [ ] |
| 1W60A | <a href="#">CYS81</a> (N)  | 3.40 | <a href="#">LYS80</a> (CB) | 1W60A |                                                                                                                       | N [ ] ... C [ ] |
| 1W60A | <a href="#">CYS81</a> (N)  | 4.81 | <a href="#">LYS80</a> (CG) | 1W60A |                                                                                                                       |                 |
| 1W60A | <a href="#">CYS81</a> (CA) | 4.10 | <a href="#">LYS80</a> (N)  | 1W60A |                                                                                                                       | C [ ] ... N [ ] |
| 1W60A | <a href="#">CYS81</a> (CA) | 3.80 | <a href="#">LYS80</a> (CA) | 1W60A |                                                                                                                       | C [ ] ... C [ ] |
| 1W60A | <a href="#">CYS81</a> (CA) | 2.44 | <a href="#">LYS80</a> (C)  | 1W60A |                                                                                                                       | C [ ] ... C [ ] |
| 1W60A | <a href="#">CYS81</a> (CA) | 2.78 | <a href="#">LYS80</a> (O)  | 1W60A |                                                                                                                       | C [ ] ... O [ ] |
| 1W60A | <a href="#">CYS81</a> (CA) | 4.67 | <a href="#">LYS80</a> (CB) | 1W60A |                                                                                                                       |                 |
| 1W60A | <a href="#">CYS81</a> (C)  | 4.79 | <a href="#">LYS80</a> (N)  | 1W60A |                                                                                                                       |                 |
| 1W60A | <a href="#">CYS81</a> (C)  | 4.57 | <a href="#">LYS80</a> (CA) | 1W60A |                                                                                                                       |                 |
| 1W60A | <a href="#">CYS81</a> (C)  | 3.25 | <a href="#">LYS80</a> (C)  | 1W60A |                                                                                                                       | C [ ] ... C [ ] |
| 1W60A | <a href="#">CYS81</a> (C)  | 3.41 | <a href="#">LYS80</a> (O)  | 1W60A |                                                                                                                       | C [ ] ... O [ ] |
| 1W60A | <a href="#">CYS81</a> (O)  | 4.32 | <a href="#">LYS80</a> (C)  | 1W60A |                                                                                                                       | O [ ] ... C [ ] |
| 1W60A | <a href="#">CYS81</a> (O)  | 4.23 | <a href="#">LYS80</a> (O)  | 1W60A |                                                                                                                       | O [ ] ... O [ ] |
| 1W60A | <a href="#">CYS81</a> (CB) | 4.79 | <a href="#">LYS80</a> (N)  | 1W60A |                                                                                                                       |                 |
| 1W60A | <a href="#">CYS81</a> (CB) | 4.81 | <a href="#">LYS80</a> (CA) | 1W60A |                                                                                                                       |                 |
| 1W60A | <a href="#">CYS81</a> (CB) | 3.65 | <a href="#">LYS80</a> (C)  | 1W60A |                                                                                                                       | C [ ] ... C [ ] |
| 1W60A | <a href="#">CYS81</a> (CB) | 4.16 | <a href="#">LYS80</a> (O)  | 1W60A |                                                                                                                       | C [ ] ... O [ ] |
| 1W60A | <a href="#">CYS81</a> (SG) | 4.80 | <a href="#">LYS80</a> (N)  | 1W60A | [D-A-AA]:78.6° [A-D-DD]:83.5° d_planarity:-64.5°, <b>maximum distance exceeded, bad d_angle(sp2), bad d_planarity</b> |                 |

|       |                           |      |                             |       |                                                                                                                                        |               |
|-------|---------------------------|------|-----------------------------|-------|----------------------------------------------------------------------------------------------------------------------------------------|---------------|
| 1W60A | <a href="#">CYS81(SG)</a> | 4.86 | <a href="#">LYS80(CA)</a>   | 1W60A |                                                                                                                                        |               |
| 1W60A | <a href="#">CYS81(SG)</a> | 4.04 | <a href="#">LYS80(C)</a>    | 1W60A |                                                                                                                                        | S[ ] ... C[ ] |
| 1W60A | <a href="#">CYS81(SG)</a> | 4.66 | <a href="#">LYS80(O)</a>    | 1W60A | Weakly positive                                                                                                                        |               |
| 1W60A | <a href="#">CYS81(N)</a>  | 2.66 | <a href="#">ALA82(N)</a>    | 1W60A |                                                                                                                                        | N[ ] ... N[ ] |
| 1W60A | <a href="#">CYS81(N)</a>  | 4.10 | <a href="#">ALA82(CA)</a>   | 1W60A |                                                                                                                                        | N[ ] ... C[ ] |
| 1W60A | <a href="#">CYS81(N)</a>  | 4.77 | <a href="#">ALA82(C)</a>    | 1W60A |                                                                                                                                        |               |
| 1W60A | <a href="#">CYS81(N)</a>  | 4.53 | <a href="#">ALA82(O)</a>    | 1W60A | [D-A-AA]:94.0° [A-D-DD]:80.5° d_planarity:62.3°<br>a_planarity:-25.2°, maximum distance exceeded,<br>bad d_angle(sp2), bad d_planarity |               |
| 1W60A | <a href="#">CYS81(N)</a>  | 4.78 | <a href="#">ALA82(CB)</a>   | 1W60A |                                                                                                                                        |               |
| 1W60A | <a href="#">CYS81(CA)</a> | 2.42 | <a href="#">ALA82(N)</a>    | 1W60A |                                                                                                                                        | C[ ] ... N[ ] |
| 1W60A | <a href="#">CYS81(CA)</a> | 3.80 | <a href="#">ALA82(CA)</a>   | 1W60A |                                                                                                                                        | C[ ] ... C[ ] |
| 1W60A | <a href="#">CYS81(CA)</a> | 4.51 | <a href="#">ALA82(C)</a>    | 1W60A |                                                                                                                                        |               |
| 1W60A | <a href="#">CYS81(CA)</a> | 4.52 | <a href="#">ALA82(O)</a>    | 1W60A |                                                                                                                                        |               |
| 1W60A | <a href="#">CYS81(CA)</a> | 4.82 | <a href="#">ALA82(CB)</a>   | 1W60A |                                                                                                                                        |               |
| 1W60A | <a href="#">CYS81(C)</a>  | 2.43 | <a href="#">ALA82(CA)</a>   | 1W60A |                                                                                                                                        | C[ ] ... C[ ] |
| 1W60A | <a href="#">CYS81(C)</a>  | 3.19 | <a href="#">ALA82(C)</a>    | 1W60A |                                                                                                                                        | C[ ] ... C[ ] |
| 1W60A | <a href="#">CYS81(C)</a>  | 3.49 | <a href="#">ALA82(O)</a>    | 1W60A |                                                                                                                                        | C[ ] ... O[ ] |
| 1W60A | <a href="#">CYS81(C)</a>  | 3.67 | <a href="#">ALA82(CB)</a>   | 1W60A |                                                                                                                                        | C[ ] ... C[ ] |
| 1W60A | <a href="#">CYS81(O)</a>  | 2.25 | <a href="#">ALA82(N)</a>    | 1W60A | [D-A-AA]:29.6° [A-D-DD]:94.3° d_planarity:0.7°<br>a_planarity:0.1°, bad a_angle(sp2)                                                   | O[ ] ... N[ ] |
| 1W60A | <a href="#">CYS81(O)</a>  | 2.77 | <a href="#">ALA82(CA)</a>   | 1W60A |                                                                                                                                        | O[ ] ... C[ ] |
| 1W60A | <a href="#">CYS81(O)</a>  | 3.31 | <a href="#">ALA82(C)</a>    | 1W60A |                                                                                                                                        | O[ ] ... C[ ] |
| 1W60A | <a href="#">CYS81(O)</a>  | 3.84 | <a href="#">ALA82(O)</a>    | 1W60A |                                                                                                                                        | O[ ] ... O[ ] |
| 1W60A | <a href="#">CYS81(O)</a>  | 4.18 | <a href="#">ALA82(CB)</a>   | 1W60A |                                                                                                                                        | O[ ] ... C[ ] |
| 1W60A | <a href="#">CYS81(CB)</a> | 3.41 | <a href="#">ALA82(N)</a>    | 1W60A |                                                                                                                                        | C[ ] ... N[ ] |
| 1W60A | <a href="#">CYS81(CB)</a> | 4.68 | <a href="#">ALA82(CA)</a>   | 1W60A |                                                                                                                                        |               |
| 1W60A | <a href="#">CYS81(SG)</a> | 4.94 | <a href="#">ALA82(N)</a>    | 1W60A | [D-A-AA]:26.1° [A-D-DD]:158.1° d_planarity:53.2°,<br>maximum distance exceeded, bad a_angle(sp3)                                       |               |
| 1W60A | <a href="#">CYS81(C)</a>  | 4.11 | <a href="#">GLY83(N)</a>    | 1W60A |                                                                                                                                        | C[ ] ... N[ ] |
| 1W60A | <a href="#">CYS81(O)</a>  | 3.86 | <a href="#">GLY83(N)</a>    | 1W60A | [D-A-AA]:92.7° [A-D-DD]:134.1° d_planarity:71.6°<br>a_planarity:24.1°, maximum distance exceeded, bad d_planarity                      | O[ ] ... N[ ] |
| 1W60A | <a href="#">CYS81(O)</a>  | 4.98 | <a href="#">GLY83(CA)</a>   | 1W60A |                                                                                                                                        |               |
| 1W60A | <a href="#">CYS81(N)</a>  | 4.88 | <a href="#">PHE103(CE2)</a> | 1W60A |                                                                                                                                        |               |
| 1W60A | <a href="#">CYS81(CA)</a> | 4.70 | <a href="#">PHE103(CE2)</a> | 1W60A |                                                                                                                                        |               |
| 1W60A | <a href="#">CYS81(C)</a>  | 4.20 | <a href="#">PHE103(CD2)</a> | 1W60A |                                                                                                                                        | C[ ] ... C[ ] |
| 1W60A | <a href="#">CYS81(C)</a>  | 4.22 | <a href="#">PHE103(CE2)</a> | 1W60A |                                                                                                                                        | C[ ] ... C[ ] |
| 1W60A | <a href="#">CYS81(O)</a>  | 4.36 | <a href="#">PHE103(CD2)</a> | 1W60A |                                                                                                                                        | O[ ] ... C[ ] |
| 1W60A | <a href="#">CYS81(O)</a>  | 4.74 | <a href="#">PHE103(CE2)</a> | 1W60A |                                                                                                                                        |               |
| 1W60A | <a href="#">CYS81(CB)</a> | 4.65 | <a href="#">PHE103(CD2)</a> | 1W60A |                                                                                                                                        |               |
| 1W60A | <a href="#">CYS81(CB)</a> | 4.31 | <a href="#">PHE103(CE2)</a> | 1W60A |                                                                                                                                        | C[ ] ... C[ ] |
| 1W60A | <a href="#">CYS81(O)</a>  | 4.48 | <a href="#">LYS110(NZ)</a>  | 1W60A | [D-A-AA]:158.5° [A-D-DD]:113.5° a_planarity:19.6°,<br>maximum distance exceeded                                                        | O[ ] ... N[+] |
| 1W60A | <a href="#">CYS81(CA)</a> | 4.74 | <a href="#">TYR114(OH)</a>  | 1W60A |                                                                                                                                        |               |
| 1W60A | <a href="#">CYS81(O)</a>  | 4.96 | <a href="#">TYR114(OH)</a>  | 1W60A | [D-A-AA]:91.1° [A-D-DD]:108.7° d_planarity:43.3°<br>a_planarity:-50.3°, maximum distance exceeded                                      |               |
| 1W60A | <a href="#">CYS81(CB)</a> | 4.47 | <a href="#">TYR114(CE1)</a> | 1W60A |                                                                                                                                        | C[ ] ... C[ ] |
| 1W60A | <a href="#">CYS81(CB)</a> | 4.14 | <a href="#">TYR114(CE2)</a> | 1W60A |                                                                                                                                        | C[ ] ... C[ ] |
| 1W60A | <a href="#">CYS81(CB)</a> | 3.77 | <a href="#">TYR114(CZ)</a>  | 1W60A |                                                                                                                                        | C[ ] ... C[ ] |
| 1W60A | <a href="#">CYS81(CB)</a> | 3.35 | <a href="#">TYR114(OH)</a>  | 1W60A |                                                                                                                                        | C[ ] ... O[ ] |
| 1W60A | <a href="#">CYS81(SG)</a> | 4.27 | <a href="#">TYR114(CE1)</a> | 1W60A |                                                                                                                                        | S[ ] ... C[ ] |

|       |                           |      |                             |       |                                                                      |               |
|-------|---------------------------|------|-----------------------------|-------|----------------------------------------------------------------------|---------------|
| 1W60A | <a href="#">CYS81(SG)</a> | 4.88 | <a href="#">TYR114(CE2)</a> | 1W60A |                                                                      |               |
| 1W60A | <a href="#">CYS81(SG)</a> | 4.11 | <a href="#">TYR114(CZ)</a>  | 1W60A |                                                                      | S[ ] ... C[ ] |
| 1W60A | <a href="#">CYS81(SG)</a> | 3.76 | <a href="#">TYR114(OH)</a>  | 1W60A | [D-A-AA]:62.7° [A-D-DD]:94.4° d_planarity:-71.7°,<br>bad d_planarity | S[ ] ... O[ ] |

| chain1 | res1/atm1                  | distance | res2/atm2                   | chain2 | H-bonding                                                                                                                              | Charge interaction |
|--------|----------------------------|----------|-----------------------------|--------|----------------------------------------------------------------------------------------------------------------------------------------|--------------------|
| 1W60A  | <a href="#">CYS162(CB)</a> | 4.44     | <a href="#">CYS135(CB)</a>  | 1W60A  |                                                                                                                                        | C[ ] ... C[ ]      |
| 1W60A  | <a href="#">CYS162(CB)</a> | 3.80     | <a href="#">CYS135(SG)</a>  | 1W60A  |                                                                                                                                        | C[ ] ... S[ ]      |
| 1W60A  | <a href="#">CYS162(SG)</a> | 3.97     | <a href="#">CYS135(CB)</a>  | 1W60A  |                                                                                                                                        | S[ ] ... C[ ]      |
| 1W60A  | <a href="#">CYS162(SG)</a> | 3.70     | <a href="#">CYS135(SG)</a>  | 1W60A  | Disulphide bridge?                                                                                                                     | S[ ] ... S[ ]      |
| 1W60A  | <a href="#">CYS162(SG)</a> | 4.00     | <a href="#">VAL137(CG2)</a> | 1W60A  |                                                                                                                                        | S[ ] ... C[ ]      |
| 1W60A  | <a href="#">CYS162(N)</a>  | 4.30     | <a href="#">ILE160(C)</a>   | 1W60A  |                                                                                                                                        | N[ ] ... C[ ]      |
| 1W60A  | <a href="#">CYS162(N)</a>  | 4.29     | <a href="#">ILE160(O)</a>   | 1W60A  | [D-A-AA]:82.0° [A-D-DD]:142.7° d_planarity:77.8°<br>a_planarity:27.0°, maximum distance exceeded,<br>bad a_angle(sp2), bad d_planarity | N[ ] ... O[ ]      |
| 1W60A  | <a href="#">CYS162(N)</a>  | 3.57     | <a href="#">SER161(N)</a>   | 1W60A  |                                                                                                                                        | N[ ] ... N[ ]      |
| 1W60A  | <a href="#">CYS162(N)</a>  | 2.42     | <a href="#">SER161(CA)</a>  | 1W60A  |                                                                                                                                        | N[ ] ... C[ ]      |
| 1W60A  | <a href="#">CYS162(N)</a>  | 2.25     | <a href="#">SER161(O)</a>   | 1W60A  | [D-A-AA]:29.7° [A-D-DD]:94.3° d_planarity:1.5°<br>a_planarity:0.1°, bad a_angle(sp2)                                                   | N[ ] ... O[ ]      |
| 1W60A  | <a href="#">CYS162(N)</a>  | 3.30     | <a href="#">SER161(CB)</a>  | 1W60A  |                                                                                                                                        | N[ ] ... C[ ]      |
| 1W60A  | <a href="#">CYS162(N)</a>  | 4.61     | <a href="#">SER161(OG)</a>  | 1W60A  | [D-A-AA]:18.5° [A-D-DD]:155.0° d_planarity:40.2°,<br>maximum distance exceeded, bad a_angle(sp3)                                       |                    |
| 1W60A  | <a href="#">CYS162(CA)</a> | 4.79     | <a href="#">SER161(N)</a>   | 1W60A  |                                                                                                                                        |                    |
| 1W60A  | <a href="#">CYS162(CA)</a> | 3.80     | <a href="#">SER161(CA)</a>  | 1W60A  |                                                                                                                                        | C[ ] ... C[ ]      |
| 1W60A  | <a href="#">CYS162(CA)</a> | 2.43     | <a href="#">SER161(C)</a>   | 1W60A  |                                                                                                                                        | C[ ] ... C[ ]      |
| 1W60A  | <a href="#">CYS162(CA)</a> | 2.77     | <a href="#">SER161(O)</a>   | 1W60A  |                                                                                                                                        | C[ ] ... O[ ]      |
| 1W60A  | <a href="#">CYS162(CA)</a> | 4.61     | <a href="#">SER161(CB)</a>  | 1W60A  |                                                                                                                                        |                    |
| 1W60A  | <a href="#">CYS162(C)</a>  | 4.78     | <a href="#">SER161(CA)</a>  | 1W60A  |                                                                                                                                        |                    |
| 1W60A  | <a href="#">CYS162(C)</a>  | 3.56     | <a href="#">SER161(C)</a>   | 1W60A  |                                                                                                                                        | C[ ] ... C[ ]      |
| 1W60A  | <a href="#">CYS162(C)</a>  | 3.96     | <a href="#">SER161(O)</a>   | 1W60A  |                                                                                                                                        | C[ ] ... O[ ]      |
| 1W60A  | <a href="#">CYS162(O)</a>  | 4.89     | <a href="#">SER161(CA)</a>  | 1W60A  |                                                                                                                                        |                    |
| 1W60A  | <a href="#">CYS162(O)</a>  | 3.98     | <a href="#">SER161(C)</a>   | 1W60A  |                                                                                                                                        | O[ ] ... C[ ]      |
| 1W60A  | <a href="#">CYS162(O)</a>  | 4.66     | <a href="#">SER161(O)</a>   | 1W60A  |                                                                                                                                        |                    |
| 1W60A  | <a href="#">CYS162(CB)</a> | 4.62     | <a href="#">SER161(CA)</a>  | 1W60A  |                                                                                                                                        |                    |
| 1W60A  | <a href="#">CYS162(CB)</a> | 3.40     | <a href="#">SER161(C)</a>   | 1W60A  |                                                                                                                                        | C[ ] ... C[ ]      |
| 1W60A  | <a href="#">CYS162(CB)</a> | 3.73     | <a href="#">SER161(O)</a>   | 1W60A  |                                                                                                                                        | C[ ] ... O[ ]      |
| 1W60A  | <a href="#">CYS162(SG)</a> | 4.62     | <a href="#">SER161(C)</a>   | 1W60A  |                                                                                                                                        |                    |
| 1W60A  | <a href="#">CYS162(SG)</a> | 4.49     | <a href="#">SER161(O)</a>   | 1W60A  |                                                                                                                                        | S[ ] ... O[ ]      |
| 1W60A  | <a href="#">CYS162(N)</a>  | 3.60     | <a href="#">ALA163(N)</a>   | 1W60A  |                                                                                                                                        | N[ ] ... N[ ]      |
| 1W60A  | <a href="#">CYS162(N)</a>  | 4.84     | <a href="#">ALA163(CA)</a>  | 1W60A  |                                                                                                                                        |                    |
| 1W60A  | <a href="#">CYS162(CA)</a> | 2.43     | <a href="#">ALA163(N)</a>   | 1W60A  |                                                                                                                                        | C[ ] ... N[ ]      |
| 1W60A  | <a href="#">CYS162(CA)</a> | 3.81     | <a href="#">ALA163(CA)</a>  | 1W60A  |                                                                                                                                        | C[ ] ... C[ ]      |
| 1W60A  | <a href="#">CYS162(CA)</a> | 4.81     | <a href="#">ALA163(C)</a>   | 1W60A  |                                                                                                                                        |                    |
| 1W60A  | <a href="#">CYS162(CA)</a> | 4.80     | <a href="#">ALA163(O)</a>   | 1W60A  |                                                                                                                                        |                    |
| 1W60A  | <a href="#">CYS162(CA)</a> | 4.55     | <a href="#">ALA163(CB)</a>  | 1W60A  |                                                                                                                                        |                    |
| 1W60A  | <a href="#">CYS162(C)</a>  | 2.44     | <a href="#">ALA163(CA)</a>  | 1W60A  |                                                                                                                                        | C[ ] ... C[ ]      |
| 1W60A  | <a href="#">CYS162(C)</a>  | 3.66     | <a href="#">ALA163(C)</a>   | 1W60A  |                                                                                                                                        | C[ ] ... C[ ]      |
| 1W60A  | <a href="#">CYS162(C)</a>  | 3.91     | <a href="#">ALA163(O)</a>   | 1W60A  |                                                                                                                                        | C[ ] ... O[ ]      |



|       |                             |      |                              |       |                                                                                                                       |               |
|-------|-----------------------------|------|------------------------------|-------|-----------------------------------------------------------------------------------------------------------------------|---------------|
| 1W60A | <a href="#">CYS162</a> (C)  | 3.24 | <a href="#">ALA163</a> (CB)  | 1W60A |                                                                                                                       | C[ ] ... C[ ] |
| 1W60A | <a href="#">CYS162</a> (O)  | 2.25 | <a href="#">ALA163</a> (N)   | 1W60A | [D-A-AA]:29.7° [A-D-DD]:94.5° d_planarity:0.7°<br>a_planarity:0.3°, bad a_angle(sp2)                                  | O[ ] ... N[ ] |
| 1W60A | <a href="#">CYS162</a> (O)  | 2.78 | <a href="#">ALA163</a> (CA)  | 1W60A |                                                                                                                       | O[ ] ... C[ ] |
| 1W60A | <a href="#">CYS162</a> (O)  | 4.16 | <a href="#">ALA163</a> (C)   | 1W60A |                                                                                                                       | O[ ] ... C[ ] |
| 1W60A | <a href="#">CYS162</a> (O)  | 4.58 | <a href="#">ALA163</a> (O)   | 1W60A |                                                                                                                       |               |
| 1W60A | <a href="#">CYS162</a> (O)  | 3.40 | <a href="#">ALA163</a> (CB)  | 1W60A |                                                                                                                       | O[ ] ... C[ ] |
| 1W60A | <a href="#">CYS162</a> (CB) | 3.24 | <a href="#">ALA163</a> (N)   | 1W60A |                                                                                                                       | C[ ] ... N[ ] |
| 1W60A | <a href="#">CYS162</a> (CB) | 4.53 | <a href="#">ALA163</a> (CA)  | 1W60A |                                                                                                                       |               |
| 1W60A | <a href="#">CYS162</a> (CB) | 4.90 | <a href="#">ALA163</a> (O)   | 1W60A |                                                                                                                       |               |
| 1W60A | <a href="#">CYS162</a> (SG) | 3.73 | <a href="#">ALA163</a> (N)   | 1W60A | [D-A-AA]:60.3° [A-D-DD]:142.6° d_planarity:-71.9°,<br>bad d_planarity                                                 | S[ ] ... N[ ] |
| 1W60A | <a href="#">CYS162</a> (SG) | 4.97 | <a href="#">ALA163</a> (CA)  | 1W60A |                                                                                                                       |               |
| 1W60A | <a href="#">CYS162</a> (SG) | 4.49 | <a href="#">ALA163</a> (O)   | 1W60A |                                                                                                                       | S[ ] ... O[ ] |
| 1W60A | <a href="#">CYS162</a> (C)  | 4.80 | <a href="#">LYS164</a> (N)   | 1W60A |                                                                                                                       |               |
| 1W60A | <a href="#">CYS162</a> (N)  | 4.95 | <a href="#">GLY166</a> (O)   | 1W60A | [D-A-AA]:134.7° [A-D-DD]:46.4° d_planarity:39.4°<br>a_planarity:23.6°, maximum distance exceeded,<br>bad d_angle(sp2) |               |
| 1W60A | <a href="#">CYS162</a> (CA) | 4.99 | <a href="#">GLY166</a> (C)   | 1W60A |                                                                                                                       |               |
| 1W60A | <a href="#">CYS162</a> (CA) | 4.08 | <a href="#">GLY166</a> (O)   | 1W60A |                                                                                                                       | C[ ] ... O[ ] |
| 1W60A | <a href="#">CYS162</a> (C)  | 4.09 | <a href="#">GLY166</a> (O)   | 1W60A |                                                                                                                       | C[ ] ... O[ ] |
| 1W60A | <a href="#">CYS162</a> (SG) | 4.80 | <a href="#">GLY166</a> (O)   | 1W60A |                                                                                                                       |               |
| 1W60A | <a href="#">CYS162</a> (CA) | 4.57 | <a href="#">VAL167</a> (CA)  | 1W60A |                                                                                                                       |               |
| 1W60A | <a href="#">CYS162</a> (CA) | 4.84 | <a href="#">VAL167</a> (CB)  | 1W60A |                                                                                                                       |               |
| 1W60A | <a href="#">CYS162</a> (SG) | 4.72 | <a href="#">VAL167</a> (CA)  | 1W60A |                                                                                                                       |               |
| 1W60A | <a href="#">CYS162</a> (SG) | 4.23 | <a href="#">VAL167</a> (CB)  | 1W60A |                                                                                                                       | S[ ] ... C[ ] |
| 1W60A | <a href="#">CYS162</a> (SG) | 4.80 | <a href="#">VAL167</a> (CG2) | 1W60A |                                                                                                                       |               |
| 1W60A | <a href="#">CYS162</a> (C)  | 4.36 | <a href="#">PRO202</a> (CA)  | 1W60A |                                                                                                                       | C[ ] ... C[ ] |
| 1W60A | <a href="#">CYS162</a> (C)  | 4.86 | <a href="#">PRO202</a> (C)   | 1W60A |                                                                                                                       |               |
| 1W60A | <a href="#">CYS162</a> (C)  | 4.51 | <a href="#">PRO202</a> (CB)  | 1W60A |                                                                                                                       |               |
| 1W60A | <a href="#">CYS162</a> (O)  | 4.78 | <a href="#">PRO202</a> (N)   | 1W60A |                                                                                                                       |               |
| 1W60A | <a href="#">CYS162</a> (O)  | 3.46 | <a href="#">PRO202</a> (CA)  | 1W60A |                                                                                                                       | O[ ] ... C[ ] |
| 1W60A | <a href="#">CYS162</a> (O)  | 3.91 | <a href="#">PRO202</a> (C)   | 1W60A |                                                                                                                       | O[ ] ... C[ ] |
| 1W60A | <a href="#">CYS162</a> (O)  | 3.43 | <a href="#">PRO202</a> (CB)  | 1W60A |                                                                                                                       | O[ ] ... C[ ] |
| 1W60A | <a href="#">CYS162</a> (O)  | 4.52 | <a href="#">PRO202</a> (CG)  | 1W60A |                                                                                                                       |               |
| 1W60A | <a href="#">CYS162</a> (N)  | 4.53 | <a href="#">VAL203</a> (N)   | 1W60A |                                                                                                                       |               |
| 1W60A | <a href="#">CYS162</a> (N)  | 4.87 | <a href="#">VAL203</a> (CA)  | 1W60A |                                                                                                                       |               |
| 1W60A | <a href="#">CYS162</a> (N)  | 4.06 | <a href="#">VAL203</a> (C)   | 1W60A |                                                                                                                       | N[ ] ... C[ ] |
| 1W60A | <a href="#">CYS162</a> (N)  | 2.84 | <a href="#">VAL203</a> (O)   | 1W60A | <b>H-bond</b> [D-A-AA]:169.4° [A-D-DD]:117.9° d_planarity:-<br>23.5° a_planarity:-7.5°                                | N[ ] ... O[ ] |
| 1W60A | <a href="#">CYS162</a> (CA) | 4.61 | <a href="#">VAL203</a> (N)   | 1W60A |                                                                                                                       |               |
| 1W60A | <a href="#">CYS162</a> (CA) | 4.85 | <a href="#">VAL203</a> (C)   | 1W60A |                                                                                                                       |               |
| 1W60A | <a href="#">CYS162</a> (CA) | 3.75 | <a href="#">VAL203</a> (O)   | 1W60A |                                                                                                                       | C[ ] ... O[ ] |
| 1W60A | <a href="#">CYS162</a> (C)  | 4.34 | <a href="#">VAL203</a> (N)   | 1W60A |                                                                                                                       | C[ ] ... N[ ] |
| 1W60A | <a href="#">CYS162</a> (C)  | 4.19 | <a href="#">VAL203</a> (O)   | 1W60A |                                                                                                                       | C[ ] ... O[ ] |
| 1W60A | <a href="#">CYS162</a> (O)  | 3.57 | <a href="#">VAL203</a> (N)   | 1W60A | [D-A-AA]:121.5° [A-D-DD]:129.9° d_planarity:-49.4°<br>a_planarity:-53.7°, maximum distance exceeded                   | O[ ] ... N[ ] |
| 1W60A | <a href="#">CYS162</a> (O)  | 4.64 | <a href="#">VAL203</a> (CA)  | 1W60A |                                                                                                                       |               |
| 1W60A | <a href="#">CYS162</a> (O)  | 4.51 | <a href="#">VAL203</a> (C)   | 1W60A |                                                                                                                       |               |
| 1W60A | <a href="#">CYS162</a> (O)  | 3.70 | <a href="#">VAL203</a> (O)   | 1W60A |                                                                                                                       | O[ ] ... O[ ] |
| 1W60A | <a href="#">CYS162</a> (CB) | 4.26 | <a href="#">VAL203</a> (N)   | 1W60A |                                                                                                                       | C[ ] ... N[ ] |

|       |                             |      |                              |       |  |                 |
|-------|-----------------------------|------|------------------------------|-------|--|-----------------|
| 1W60A | <a href="#">CYS162</a> (CB) | 4.85 | <a href="#">VAL203</a> (CA)  | 1W60A |  |                 |
| 1W60A | <a href="#">CYS162</a> (CB) | 4.71 | <a href="#">VAL203</a> (C)   | 1W60A |  |                 |
| 1W60A | <a href="#">CYS162</a> (CB) | 3.82 | <a href="#">VAL203</a> (O)   | 1W60A |  | C [ ] ... O [ ] |
| 1W60A | <a href="#">CYS162</a> (CB) | 4.90 | <a href="#">VAL203</a> (CB)  | 1W60A |  |                 |
| 1W60A | <a href="#">CYS162</a> (CB) | 4.98 | <a href="#">VAL203</a> (CG2) | 1W60A |  |                 |
| 1W60A | <a href="#">CYS162</a> (CB) | 4.90 | <a href="#">MET229</a> (SD)  | 1W60A |  |                 |
| 1W60A | <a href="#">CYS162</a> (CB) | 3.84 | <a href="#">MET229</a> (CE)  | 1W60A |  | C [ ] ... C [ ] |
| 1W60A | <a href="#">CYS162</a> (SG) | 3.73 | <a href="#">MET229</a> (CE)  | 1W60A |  | S [ ] ... C [ ] |

| chain1 | res1/atm1                   | distance | res2/atm2                    | chain2 | H-bonding                                                                                                            | Charge interaction |
|--------|-----------------------------|----------|------------------------------|--------|----------------------------------------------------------------------------------------------------------------------|--------------------|
| 1RK4A  | <a href="#">CYS191</a> (N)  | 4.55     | <a href="#">PHE114</a> (CE1) | 1RK4A  |                                                                                                                      |                    |
| 1RK4A  | <a href="#">CYS191</a> (SG) | 4.82     | <a href="#">PHE114</a> (CG)  | 1RK4A  |                                                                                                                      |                    |
| 1RK4A  | <a href="#">CYS191</a> (SG) | 3.58     | <a href="#">PHE114</a> (CD1) | 1RK4A  |                                                                                                                      | S [ ] ... C [ ]    |
| 1RK4A  | <a href="#">CYS191</a> (SG) | 3.69     | <a href="#">PHE114</a> (CE1) | 1RK4A  |                                                                                                                      | S [ ] ... C [ ]    |
| 1RK4A  | <a href="#">CYS191</a> (SG) | 4.99     | <a href="#">PHE114</a> (CZ)  | 1RK4A  |                                                                                                                      |                    |
| 1RK4A  | <a href="#">CYS191</a> (CB) | 4.56     | <a href="#">TYR117</a> (CE2) | 1RK4A  |                                                                                                                      |                    |
| 1RK4A  | <a href="#">CYS191</a> (SG) | 4.07     | <a href="#">TYR117</a> (CD2) | 1RK4A  |                                                                                                                      | S [ ] ... C [ ]    |
| 1RK4A  | <a href="#">CYS191</a> (SG) | 3.81     | <a href="#">TYR117</a> (CE2) | 1RK4A  |                                                                                                                      | S [ ] ... C [ ]    |
| 1RK4A  | <a href="#">CYS191</a> (N)  | 4.56     | <a href="#">ILE118</a> (CD1) | 1RK4A  |                                                                                                                      |                    |
| 1RK4A  | <a href="#">CYS191</a> (CA) | 4.52     | <a href="#">ILE118</a> (CD1) | 1RK4A  |                                                                                                                      |                    |
| 1RK4A  | <a href="#">CYS191</a> (SG) | 4.41     | <a href="#">ILE118</a> (CD1) | 1RK4A  |                                                                                                                      | S [ ] ... C [ ]    |
| 1RK4A  | <a href="#">CYS191</a> (SG) | 4.19     | <a href="#">LEU133</a> (CD2) | 1RK4A  |                                                                                                                      | S [ ] ... C [ ]    |
| 1RK4A  | <a href="#">CYS191</a> (N)  | 4.52     | <a href="#">ILE186</a> (O)   | 1RK4A  | [D-A-AA]:144.6° [A-D-DD]:150.0° d_planarity:-0.4°<br>a_planarity:16.4°, maximum distance exceeded                    |                    |
| 1RK4A  | <a href="#">CYS191</a> (N)  | 4.07     | <a href="#">VAL187</a> (C)   | 1RK4A  |                                                                                                                      | N [ ] ... C [ ]    |
| 1RK4A  | <a href="#">CYS191</a> (N)  | 2.90     | <a href="#">VAL187</a> (O)   | 1RK4A  | <b>H-bond</b> [D-A-AA]:158.9° [A-D-DD]:107.6° d_planarity:-3.1°<br>a_planarity:86.6°                                 | N [ ] ... O [ ]    |
| 1RK4A  | <a href="#">CYS191</a> (CA) | 4.85     | <a href="#">VAL187</a> (C)   | 1RK4A  |                                                                                                                      |                    |
| 1RK4A  | <a href="#">CYS191</a> (CA) | 3.62     | <a href="#">VAL187</a> (O)   | 1RK4A  |                                                                                                                      | C [ ] ... O [ ]    |
| 1RK4A  | <a href="#">CYS191</a> (C)  | 4.65     | <a href="#">VAL187</a> (O)   | 1RK4A  |                                                                                                                      |                    |
| 1RK4A  | <a href="#">CYS191</a> (CB) | 4.34     | <a href="#">VAL187</a> (C)   | 1RK4A  |                                                                                                                      | C [ ] ... C [ ]    |
| 1RK4A  | <a href="#">CYS191</a> (CB) | 3.20     | <a href="#">VAL187</a> (O)   | 1RK4A  |                                                                                                                      | C [ ] ... O [ ]    |
| 1RK4A  | <a href="#">CYS191</a> (SG) | 4.64     | <a href="#">VAL187</a> (CA)  | 1RK4A  |                                                                                                                      |                    |
| 1RK4A  | <a href="#">CYS191</a> (SG) | 4.18     | <a href="#">VAL187</a> (C)   | 1RK4A  |                                                                                                                      | S [ ] ... C [ ]    |
| 1RK4A  | <a href="#">CYS191</a> (SG) | 3.21     | <a href="#">VAL187</a> (O)   | 1RK4A  |                                                                                                                      | S [ ] ... O [ ]    |
| 1RK4A  | <a href="#">CYS191</a> (SG) | 4.99     | <a href="#">VAL187</a> (CB)  | 1RK4A  |                                                                                                                      |                    |
| 1RK4A  | <a href="#">CYS191</a> (SG) | 4.03     | <a href="#">VAL187</a> (CG1) | 1RK4A  |                                                                                                                      | S [ ] ... C [ ]    |
| 1RK4A  | <a href="#">CYS191</a> (N)  | 4.87     | <a href="#">GLN188</a> (N)   | 1RK4A  |                                                                                                                      |                    |
| 1RK4A  | <a href="#">CYS191</a> (N)  | 4.81     | <a href="#">GLN188</a> (CA)  | 1RK4A  |                                                                                                                      |                    |
| 1RK4A  | <a href="#">CYS191</a> (N)  | 4.08     | <a href="#">GLN188</a> (C)   | 1RK4A  |                                                                                                                      | N [ ] ... C [ ]    |
| 1RK4A  | <a href="#">CYS191</a> (N)  | 3.75     | <a href="#">GLN188</a> (O)   | 1RK4A  | [D-A-AA]:96.4° [A-D-DD]:95.3° d_planarity:-63.4°<br>a_planarity:79.8°, maximum distance exceeded,<br>bad d_planarity | N [ ] ... O [ ]    |
| 1RK4A  | <a href="#">CYS191</a> (CA) | 4.75     | <a href="#">GLN188</a> (C)   | 1RK4A  |                                                                                                                      |                    |
| 1RK4A  | <a href="#">CYS191</a> (CA) | 4.15     | <a href="#">GLN188</a> (O)   | 1RK4A  |                                                                                                                      | C [ ] ... O [ ]    |
| 1RK4A  | <a href="#">CYS191</a> (C)  | 4.89     | <a href="#">GLN188</a> (C)   | 1RK4A  |                                                                                                                      |                    |
| 1RK4A  | <a href="#">CYS191</a> (C)  | 3.96     | <a href="#">GLN188</a> (O)   | 1RK4A  |                                                                                                                      | C [ ] ... O [ ]    |

|       |                             |      |                              |       |                                                                                                                                        |               |
|-------|-----------------------------|------|------------------------------|-------|----------------------------------------------------------------------------------------------------------------------------------------|---------------|
| 1RK4A | <a href="#">CYS191</a> (CB) | 4.86 | <a href="#">GLN188</a> (CA)  | 1RK4A |                                                                                                                                        |               |
| 1RK4A | <a href="#">CYS191</a> (CB) | 4.73 | <a href="#">GLN188</a> (C)   | 1RK4A |                                                                                                                                        |               |
| 1RK4A | <a href="#">CYS191</a> (CB) | 4.26 | <a href="#">GLN188</a> (O)   | 1RK4A |                                                                                                                                        | C[ ] ... O[ ] |
| 1RK4A | <a href="#">CYS191</a> (N)  | 4.46 | <a href="#">VAL189</a> (N)   | 1RK4A |                                                                                                                                        | N[ ] ... N[ ] |
| 1RK4A | <a href="#">CYS191</a> (N)  | 4.59 | <a href="#">VAL189</a> (CA)  | 1RK4A |                                                                                                                                        |               |
| 1RK4A | <a href="#">CYS191</a> (N)  | 3.48 | <a href="#">VAL189</a> (C)   | 1RK4A |                                                                                                                                        | N[ ] ... C[ ] |
| 1RK4A | <a href="#">CYS191</a> (N)  | 3.70 | <a href="#">VAL189</a> (O)   | 1RK4A | [D-A-AA]:70.5° [A-D-DD]:119.4° d_planarity:64.4°<br>a_planarity:43.9°, maximum distance exceeded,<br>bad a_angle(sp2), bad d_planarity | N[ ] ... O[ ] |
| 1RK4A | <a href="#">CYS191</a> (CA) | 4.62 | <a href="#">VAL189</a> (C)   | 1RK4A |                                                                                                                                        |               |
| 1RK4A | <a href="#">CYS191</a> (CA) | 4.60 | <a href="#">VAL189</a> (O)   | 1RK4A |                                                                                                                                        |               |
| 1RK4A | <a href="#">CYS191</a> (C)  | 4.65 | <a href="#">VAL189</a> (C)   | 1RK4A |                                                                                                                                        |               |
| 1RK4A | <a href="#">CYS191</a> (C)  | 4.27 | <a href="#">VAL189</a> (O)   | 1RK4A |                                                                                                                                        | C[ ] ... O[ ] |
| 1RK4A | <a href="#">CYS191</a> (N)  | 2.84 | <a href="#">VAL190</a> (N)   | 1RK4A |                                                                                                                                        | N[ ] ... N[ ] |
| 1RK4A | <a href="#">CYS191</a> (N)  | 2.45 | <a href="#">VAL190</a> (CA)  | 1RK4A |                                                                                                                                        | N[ ] ... C[ ] |
| 1RK4A | <a href="#">CYS191</a> (N)  | 2.24 | <a href="#">VAL190</a> (O)   | 1RK4A | [D-A-AA]:30.1° [A-D-DD]:92.0° d_planarity:3.2°<br>a_planarity:0.9°, bad a_angle(sp2)                                                   | N[ ] ... O[ ] |
| 1RK4A | <a href="#">CYS191</a> (N)  | 3.13 | <a href="#">VAL190</a> (CB)  | 1RK4A |                                                                                                                                        | N[ ] ... C[ ] |
| 1RK4A | <a href="#">CYS191</a> (N)  | 3.63 | <a href="#">VAL190</a> (CG1) | 1RK4A |                                                                                                                                        | N[ ] ... C[ ] |
| 1RK4A | <a href="#">CYS191</a> (N)  | 4.56 | <a href="#">VAL190</a> (CG2) | 1RK4A |                                                                                                                                        |               |
| 1RK4A | <a href="#">CYS191</a> (CA) | 4.21 | <a href="#">VAL190</a> (N)   | 1RK4A |                                                                                                                                        | C[ ] ... N[ ] |
| 1RK4A | <a href="#">CYS191</a> (CA) | 3.81 | <a href="#">VAL190</a> (CA)  | 1RK4A |                                                                                                                                        | C[ ] ... C[ ] |
| 1RK4A | <a href="#">CYS191</a> (CA) | 2.41 | <a href="#">VAL190</a> (C)   | 1RK4A |                                                                                                                                        | C[ ] ... C[ ] |
| 1RK4A | <a href="#">CYS191</a> (CA) | 2.72 | <a href="#">VAL190</a> (O)   | 1RK4A |                                                                                                                                        | C[ ] ... O[ ] |
| 1RK4A | <a href="#">CYS191</a> (CA) | 4.49 | <a href="#">VAL190</a> (CB)  | 1RK4A |                                                                                                                                        | C[ ] ... C[ ] |
| 1RK4A | <a href="#">CYS191</a> (CA) | 4.69 | <a href="#">VAL190</a> (CG1) | 1RK4A |                                                                                                                                        |               |
| 1RK4A | <a href="#">CYS191</a> (C)  | 4.66 | <a href="#">VAL190</a> (N)   | 1RK4A |                                                                                                                                        |               |
| 1RK4A | <a href="#">CYS191</a> (C)  | 4.41 | <a href="#">VAL190</a> (CA)  | 1RK4A |                                                                                                                                        | C[ ] ... C[ ] |
| 1RK4A | <a href="#">CYS191</a> (C)  | 3.03 | <a href="#">VAL190</a> (C)   | 1RK4A |                                                                                                                                        | C[ ] ... C[ ] |
| 1RK4A | <a href="#">CYS191</a> (C)  | 2.98 | <a href="#">VAL190</a> (O)   | 1RK4A |                                                                                                                                        | C[ ] ... O[ ] |
| 1RK4A | <a href="#">CYS191</a> (O)  | 3.86 | <a href="#">VAL190</a> (C)   | 1RK4A |                                                                                                                                        | O[ ] ... C[ ] |
| 1RK4A | <a href="#">CYS191</a> (O)  | 3.45 | <a href="#">VAL190</a> (O)   | 1RK4A |                                                                                                                                        | O[ ] ... O[ ] |
| 1RK4A | <a href="#">CYS191</a> (CB) | 4.91 | <a href="#">VAL190</a> (CA)  | 1RK4A |                                                                                                                                        |               |
| 1RK4A | <a href="#">CYS191</a> (CB) | 3.72 | <a href="#">VAL190</a> (C)   | 1RK4A |                                                                                                                                        | C[ ] ... C[ ] |
| 1RK4A | <a href="#">CYS191</a> (CB) | 4.22 | <a href="#">VAL190</a> (O)   | 1RK4A |                                                                                                                                        | C[ ] ... O[ ] |
| 1RK4A | <a href="#">CYS191</a> (SG) | 4.36 | <a href="#">VAL190</a> (C)   | 1RK4A |                                                                                                                                        | S[ ] ... C[ ] |
| 1RK4A | <a href="#">CYS191</a> (SG) | 4.96 | <a href="#">VAL190</a> (O)   | 1RK4A |                                                                                                                                        |               |
| 1RK4A | <a href="#">CYS191</a> (N)  | 2.90 | <a href="#">LYS192</a> (N)   | 1RK4A |                                                                                                                                        | N[ ] ... N[ ] |
| 1RK4A | <a href="#">CYS191</a> (N)  | 4.33 | <a href="#">LYS192</a> (CA)  | 1RK4A |                                                                                                                                        | N[ ] ... C[ ] |
| 1RK4A | <a href="#">CYS191</a> (N)  | 4.83 | <a href="#">LYS192</a> (C)   | 1RK4A |                                                                                                                                        |               |
| 1RK4A | <a href="#">CYS191</a> (CA) | 2.47 | <a href="#">LYS192</a> (N)   | 1RK4A |                                                                                                                                        | C[ ] ... N[ ] |
| 1RK4A | <a href="#">CYS191</a> (CA) | 3.84 | <a href="#">LYS192</a> (CA)  | 1RK4A |                                                                                                                                        | C[ ] ... C[ ] |
| 1RK4A | <a href="#">CYS191</a> (CA) | 4.45 | <a href="#">LYS192</a> (C)   | 1RK4A |                                                                                                                                        | C[ ] ... C[ ] |
| 1RK4A | <a href="#">CYS191</a> (CA) | 4.93 | <a href="#">LYS192</a> (CB)  | 1RK4A |                                                                                                                                        |               |
| 1RK4A | <a href="#">CYS191</a> (C)  | 2.43 | <a href="#">LYS192</a> (CA)  | 1RK4A |                                                                                                                                        | C[ ] ... C[ ] |
| 1RK4A | <a href="#">CYS191</a> (C)  | 3.03 | <a href="#">LYS192</a> (C)   | 1RK4A |                                                                                                                                        | C[ ] ... C[ ] |
| 1RK4A | <a href="#">CYS191</a> (C)  | 3.78 | <a href="#">LYS192</a> (O)   | 1RK4A |                                                                                                                                        | C[ ] ... O[ ] |
| 1RK4A | <a href="#">CYS191</a> (C)  | 3.72 | <a href="#">LYS192</a> (CB)  | 1RK4A |                                                                                                                                        | C[ ] ... C[ ] |
| 1RK4A | <a href="#">CYS191</a> (C)  | 4.95 | <a href="#">LYS192</a> (CG)  | 1RK4A |                                                                                                                                        |               |
| 1RK4A | <a href="#">CYS191</a> (O)  | 2.23 | <a href="#">LYS192</a> (N)   | 1RK4A | [D-A-AA]:30.4° [A-D-DD]:93.1° d_planarity:0.0°                                                                                         | O[ ] ... N[ ] |

|       |                            |      |                            |       |                                                                                                                                        |               |
|-------|----------------------------|------|----------------------------|-------|----------------------------------------------------------------------------------------------------------------------------------------|---------------|
|       |                            |      |                            |       | a_planarity:1.1°, bad a_angle(sp2)                                                                                                     |               |
| 1RK4A | <a href="#">CYS191(O)</a>  | 2.73 | <a href="#">LYS192(CA)</a> | 1RK4A |                                                                                                                                        | O[ ] ... C[ ] |
| 1RK4A | <a href="#">CYS191(O)</a>  | 2.96 | <a href="#">LYS192(C)</a>  | 1RK4A |                                                                                                                                        | O[ ] ... C[ ] |
| 1RK4A | <a href="#">CYS191(O)</a>  | 3.31 | <a href="#">LYS192(O)</a>  | 1RK4A |                                                                                                                                        | O[ ] ... O[ ] |
| 1RK4A | <a href="#">CYS191(O)</a>  | 4.22 | <a href="#">LYS192(CB)</a> | 1RK4A |                                                                                                                                        | O[ ] ... C[ ] |
| 1RK4A | <a href="#">CYS191(CB)</a> | 3.25 | <a href="#">LYS192(N)</a>  | 1RK4A |                                                                                                                                        | C[ ] ... N[ ] |
| 1RK4A | <a href="#">CYS191(CB)</a> | 4.56 | <a href="#">LYS192(CA)</a> | 1RK4A |                                                                                                                                        |               |
| 1RK4A | <a href="#">CYS191(SG)</a> | 4.96 | <a href="#">LYS192(N)</a>  | 1RK4A | [D-A-AA]:16.5° [A-D-DD]:156.6° d_planarity:52.5°,<br>maximum distance exceeded, bad a_angle(sp3)                                       |               |
| 1RK4A | <a href="#">CYS191(N)</a>  | 4.52 | <a href="#">LYS193(N)</a>  | 1RK4A |                                                                                                                                        |               |
| 1RK4A | <a href="#">CYS191(CA)</a> | 4.52 | <a href="#">LYS193(N)</a>  | 1RK4A |                                                                                                                                        |               |
| 1RK4A | <a href="#">CYS191(C)</a>  | 3.38 | <a href="#">LYS193(N)</a>  | 1RK4A |                                                                                                                                        | C[ ] ... N[ ] |
| 1RK4A | <a href="#">CYS191(C)</a>  | 4.53 | <a href="#">LYS193(CA)</a> | 1RK4A |                                                                                                                                        |               |
| 1RK4A | <a href="#">CYS191(C)</a>  | 4.63 | <a href="#">LYS193(C)</a>  | 1RK4A |                                                                                                                                        |               |
| 1RK4A | <a href="#">CYS191(O)</a>  | 3.56 | <a href="#">LYS193(N)</a>  | 1RK4A | [D-A-AA]:71.8° [A-D-DD]:122.2° d_planarity:64.2°<br>a_planarity:44.4°, maximum distance exceeded,<br>bad a_angle(sp2), bad d_planarity | O[ ] ... N[ ] |
| 1RK4A | <a href="#">CYS191(O)</a>  | 4.50 | <a href="#">LYS193(CA)</a> | 1RK4A |                                                                                                                                        |               |
| 1RK4A | <a href="#">CYS191(O)</a>  | 4.28 | <a href="#">LYS193(C)</a>  | 1RK4A |                                                                                                                                        | O[ ] ... C[ ] |
| 1RK4A | <a href="#">CYS191(N)</a>  | 4.86 | <a href="#">TYR194(N)</a>  | 1RK4A |                                                                                                                                        |               |
| 1RK4A | <a href="#">CYS191(CA)</a> | 4.72 | <a href="#">TYR194(N)</a>  | 1RK4A |                                                                                                                                        |               |
| 1RK4A | <a href="#">CYS191(C)</a>  | 4.06 | <a href="#">TYR194(N)</a>  | 1RK4A |                                                                                                                                        | C[ ] ... N[ ] |
| 1RK4A | <a href="#">CYS191(C)</a>  | 4.94 | <a href="#">TYR194(CA)</a> | 1RK4A |                                                                                                                                        |               |
| 1RK4A | <a href="#">CYS191(C)</a>  | 4.86 | <a href="#">TYR194(C)</a>  | 1RK4A |                                                                                                                                        |               |
| 1RK4A | <a href="#">CYS191(O)</a>  | 3.71 | <a href="#">TYR194(N)</a>  | 1RK4A | [D-A-AA]:97.7° [A-D-DD]:108.3° d_planarity:-54.8°<br>a_planarity:84.9°, maximum distance exceeded                                      | O[ ] ... N[ ] |
| 1RK4A | <a href="#">CYS191(O)</a>  | 4.40 | <a href="#">TYR194(CA)</a> | 1RK4A |                                                                                                                                        | O[ ] ... C[ ] |
| 1RK4A | <a href="#">CYS191(O)</a>  | 4.04 | <a href="#">TYR194(C)</a>  | 1RK4A |                                                                                                                                        | O[ ] ... C[ ] |
| 1RK4A | <a href="#">CYS191(CA)</a> | 4.54 | <a href="#">ARG195(N)</a>  | 1RK4A |                                                                                                                                        |               |
| 1RK4A | <a href="#">CYS191(CA)</a> | 4.47 | <a href="#">ARG195(CB)</a> | 1RK4A |                                                                                                                                        | C[ ] ... C[ ] |
| 1RK4A | <a href="#">CYS191(CA)</a> | 4.96 | <a href="#">ARG195(CG)</a> | 1RK4A |                                                                                                                                        |               |
| 1RK4A | <a href="#">CYS191(C)</a>  | 3.92 | <a href="#">ARG195(N)</a>  | 1RK4A |                                                                                                                                        | C[ ] ... N[ ] |
| 1RK4A | <a href="#">CYS191(C)</a>  | 4.53 | <a href="#">ARG195(CA)</a> | 1RK4A |                                                                                                                                        |               |
| 1RK4A | <a href="#">CYS191(C)</a>  | 4.72 | <a href="#">ARG195(C)</a>  | 1RK4A |                                                                                                                                        |               |
| 1RK4A | <a href="#">CYS191(C)</a>  | 4.32 | <a href="#">ARG195(CB)</a> | 1RK4A |                                                                                                                                        | C[ ] ... C[ ] |
| 1RK4A | <a href="#">CYS191(O)</a>  | 2.93 | <a href="#">ARG195(N)</a>  | 1RK4A | <b>H-bond</b> [D-A-AA]:138.3° [A-D-DD]:95.1° d_planarity:-18.4°<br>a_planarity:-64.3°                                                  | O[ ] ... N[ ] |
| 1RK4A | <a href="#">CYS191(O)</a>  | 3.39 | <a href="#">ARG195(CA)</a> | 1RK4A |                                                                                                                                        | O[ ] ... C[ ] |
| 1RK4A | <a href="#">CYS191(O)</a>  | 3.50 | <a href="#">ARG195(C)</a>  | 1RK4A |                                                                                                                                        | O[ ] ... C[ ] |
| 1RK4A | <a href="#">CYS191(O)</a>  | 4.51 | <a href="#">ARG195(O)</a>  | 1RK4A |                                                                                                                                        |               |
| 1RK4A | <a href="#">CYS191(O)</a>  | 3.38 | <a href="#">ARG195(CB)</a> | 1RK4A |                                                                                                                                        | O[ ] ... C[ ] |
| 1RK4A | <a href="#">CYS191(O)</a>  | 4.46 | <a href="#">ARG195(CG)</a> | 1RK4A |                                                                                                                                        | O[ ] ... C[ ] |
| 1RK4A | <a href="#">CYS191(CB)</a> | 4.93 | <a href="#">ARG195(CB)</a> | 1RK4A |                                                                                                                                        |               |
| 1RK4A | <a href="#">CYS191(C)</a>  | 4.25 | <a href="#">GLY196(N)</a>  | 1RK4A |                                                                                                                                        | C[ ] ... N[ ] |
| 1RK4A | <a href="#">CYS191(C)</a>  | 4.91 | <a href="#">GLY196(CA)</a> | 1RK4A |                                                                                                                                        |               |
| 1RK4A | <a href="#">CYS191(C)</a>  | 4.90 | <a href="#">GLY196(C)</a>  | 1RK4A |                                                                                                                                        |               |
| 1RK4A | <a href="#">CYS191(O)</a>  | 3.08 | <a href="#">GLY196(N)</a>  | 1RK4A | [D-A-AA]:160.9° [A-D-DD]:112.6° d_planarity:-65.6°<br>a_planarity:10.2°, bad d_planarity                                               | O[ ] ... N[ ] |
| 1RK4A | <a href="#">CYS191(O)</a>  | 3.88 | <a href="#">GLY196(CA)</a> | 1RK4A |                                                                                                                                        | O[ ] ... C[ ] |
| 1RK4A | <a href="#">CYS191(O)</a>  | 4.01 | <a href="#">GLY196(C)</a>  | 1RK4A |                                                                                                                                        | O[ ] ... C[ ] |
| 1RK4A | <a href="#">CYS191(CA)</a> | 4.91 | <a href="#">PHE197(N)</a>  | 1RK4A |                                                                                                                                        |               |

|       |                            |      |                             |       |                                                                                    |               |
|-------|----------------------------|------|-----------------------------|-------|------------------------------------------------------------------------------------|---------------|
| 1RK4A | <a href="#">CYS191(CA)</a> | 4.25 | <a href="#">PHE197(O)</a>   | 1RK4A |                                                                                    | C[ ] ... O[ ] |
| 1RK4A | <a href="#">CYS191(CA)</a> | 4.74 | <a href="#">PHE197(CB)</a>  | 1RK4A |                                                                                    |               |
| 1RK4A | <a href="#">CYS191(C)</a>  | 3.95 | <a href="#">PHE197(N)</a>   | 1RK4A |                                                                                    | C[ ] ... N[ ] |
| 1RK4A | <a href="#">CYS191(C)</a>  | 4.52 | <a href="#">PHE197(CA)</a>  | 1RK4A |                                                                                    |               |
| 1RK4A | <a href="#">CYS191(C)</a>  | 4.41 | <a href="#">PHE197(C)</a>   | 1RK4A |                                                                                    | C[ ] ... C[ ] |
| 1RK4A | <a href="#">CYS191(C)</a>  | 3.50 | <a href="#">PHE197(O)</a>   | 1RK4A |                                                                                    | C[ ] ... O[ ] |
| 1RK4A | <a href="#">CYS191(C)</a>  | 4.51 | <a href="#">PHE197(CB)</a>  | 1RK4A |                                                                                    |               |
| 1RK4A | <a href="#">CYS191(O)</a>  | 3.18 | <a href="#">PHE197(N)</a>   | 1RK4A | <b>H-bond</b> [D-A-AA]:120.9° [A-D-DD]:116.5° d_planarity:-14.9° a_planarity:74.9° | O[ ] ... N[ ] |
| 1RK4A | <a href="#">CYS191(O)</a>  | 4.05 | <a href="#">PHE197(CA)</a>  | 1RK4A |                                                                                    | O[ ] ... C[ ] |
| 1RK4A | <a href="#">CYS191(O)</a>  | 4.30 | <a href="#">PHE197(C)</a>   | 1RK4A |                                                                                    | O[ ] ... C[ ] |
| 1RK4A | <a href="#">CYS191(O)</a>  | 3.66 | <a href="#">PHE197(O)</a>   | 1RK4A |                                                                                    | O[ ] ... O[ ] |
| 1RK4A | <a href="#">CYS191(O)</a>  | 4.12 | <a href="#">PHE197(CB)</a>  | 1RK4A |                                                                                    | O[ ] ... C[ ] |
| 1RK4A | <a href="#">CYS191(CB)</a> | 4.86 | <a href="#">PHE197(N)</a>   | 1RK4A |                                                                                    |               |
| 1RK4A | <a href="#">CYS191(CB)</a> | 4.68 | <a href="#">PHE197(CA)</a>  | 1RK4A |                                                                                    |               |
| 1RK4A | <a href="#">CYS191(CB)</a> | 4.48 | <a href="#">PHE197(C)</a>   | 1RK4A |                                                                                    | C[ ] ... C[ ] |
| 1RK4A | <a href="#">CYS191(CB)</a> | 3.73 | <a href="#">PHE197(O)</a>   | 1RK4A |                                                                                    | C[ ] ... O[ ] |
| 1RK4A | <a href="#">CYS191(CB)</a> | 4.01 | <a href="#">PHE197(CB)</a>  | 1RK4A |                                                                                    | C[ ] ... C[ ] |
| 1RK4A | <a href="#">CYS191(CB)</a> | 4.34 | <a href="#">PHE197(CG)</a>  | 1RK4A |                                                                                    | C[ ] ... C[ ] |
| 1RK4A | <a href="#">CYS191(CB)</a> | 3.80 | <a href="#">PHE197(CD1)</a> | 1RK4A |                                                                                    | C[ ] ... C[ ] |
| 1RK4A | <a href="#">CYS191(CB)</a> | 4.75 | <a href="#">PHE197(CE1)</a> | 1RK4A |                                                                                    |               |
| 1RK4A | <a href="#">CYS191(SG)</a> | 4.97 | <a href="#">PHE197(CB)</a>  | 1RK4A |                                                                                    |               |
| 1RK4A | <a href="#">CYS191(SG)</a> | 4.96 | <a href="#">PHE197(CG)</a>  | 1RK4A |                                                                                    |               |
| 1RK4A | <a href="#">CYS191(SG)</a> | 4.35 | <a href="#">PHE197(CD1)</a> | 1RK4A |                                                                                    | S[ ] ... C[ ] |
| 1RK4A | <a href="#">CYS191(SG)</a> | 4.94 | <a href="#">PHE197(CE1)</a> | 1RK4A |                                                                                    |               |

| chain1 | res1/atm1                 | distance | res2/atm2                 | chain2 | H-bonding                                                                                                                           | Charge interaction |
|--------|---------------------------|----------|---------------------------|--------|-------------------------------------------------------------------------------------------------------------------------------------|--------------------|
| 2ALDA  | <a href="#">CYS72(N)</a>  | 4.74     | <a href="#">GLY26(O)</a>  | 2ALDA  | [D-A-AA]:117.1° [A-D-DD]:46.0° d_planarity:13.8°<br>a_planarity:69.3°, <b>maximum distance exceeded,</b><br><b>bad d_angle(sp2)</b> |                    |
| 2ALDA  | <a href="#">CYS72(CA)</a> | 4.76     | <a href="#">GLY26(C)</a>  | 2ALDA  |                                                                                                                                     |                    |
| 2ALDA  | <a href="#">CYS72(CA)</a> | 3.87     | <a href="#">GLY26(O)</a>  | 2ALDA  |                                                                                                                                     | C[ ] ... O[ ]      |
| 2ALDA  | <a href="#">CYS72(C)</a>  | 4.90     | <a href="#">GLY26(C)</a>  | 2ALDA  |                                                                                                                                     |                    |
| 2ALDA  | <a href="#">CYS72(C)</a>  | 4.14     | <a href="#">GLY26(O)</a>  | 2ALDA  |                                                                                                                                     | C[ ] ... O[ ]      |
| 2ALDA  | <a href="#">CYS72(O)</a>  | 4.49     | <a href="#">GLY26(C)</a>  | 2ALDA  |                                                                                                                                     | O[ ] ... C[ ]      |
| 2ALDA  | <a href="#">CYS72(O)</a>  | 3.73     | <a href="#">GLY26(O)</a>  | 2ALDA  |                                                                                                                                     | O[ ] ... O[ ]      |
| 2ALDA  | <a href="#">CYS72(CB)</a> | 4.79     | <a href="#">GLY26(O)</a>  | 2ALDA  |                                                                                                                                     |                    |
| 2ALDA  | <a href="#">CYS72(CA)</a> | 4.62     | <a href="#">LYS27(CA)</a> | 2ALDA  |                                                                                                                                     |                    |
| 2ALDA  | <a href="#">CYS72(C)</a>  | 4.94     | <a href="#">LYS27(N)</a>  | 2ALDA  |                                                                                                                                     |                    |
| 2ALDA  | <a href="#">CYS72(C)</a>  | 3.99     | <a href="#">LYS27(CA)</a> | 2ALDA  |                                                                                                                                     | C[ ] ... C[ ]      |
| 2ALDA  | <a href="#">CYS72(C)</a>  | 4.64     | <a href="#">LYS27(C)</a>  | 2ALDA  |                                                                                                                                     |                    |
| 2ALDA  | <a href="#">CYS72(C)</a>  | 4.29     | <a href="#">LYS27(CB)</a> | 2ALDA  |                                                                                                                                     | C[ ] ... C[ ]      |
| 2ALDA  | <a href="#">CYS72(C)</a>  | 4.69     | <a href="#">LYS27(CG)</a> | 2ALDA  |                                                                                                                                     |                    |
| 2ALDA  | <a href="#">CYS72(O)</a>  | 4.41     | <a href="#">LYS27(N)</a>  | 2ALDA  | [D-A-AA]:108.6° [A-D-DD]:35.3° d_planarity:2.9°<br>a_planarity:-66.7°, <b>maximum distance exceeded,</b><br><b>bad d_angle(sp2)</b> | O[ ] ... N[ ]      |
| 2ALDA  | <a href="#">CYS72(O)</a>  | 3.33     | <a href="#">LYS27(CA)</a> | 2ALDA  |                                                                                                                                     | O[ ] ... C[ ]      |
| 2ALDA  | <a href="#">CYS72(O)</a>  | 3.67     | <a href="#">LYS27(C)</a>  | 2ALDA  |                                                                                                                                     | O[ ] ... C[ ]      |

|       |                           |      |                           |       |                                                                                                               |               |
|-------|---------------------------|------|---------------------------|-------|---------------------------------------------------------------------------------------------------------------|---------------|
| 2ALDA | <a href="#">CYS72(O)</a>  | 4.86 | <a href="#">LYS27(O)</a>  | 2ALDA |                                                                                                               |               |
| 2ALDA | <a href="#">CYS72(O)</a>  | 3.88 | <a href="#">LYS27(CB)</a> | 2ALDA |                                                                                                               | O[ ] ... C[ ] |
| 2ALDA | <a href="#">CYS72(O)</a>  | 4.64 | <a href="#">LYS27(CG)</a> | 2ALDA |                                                                                                               |               |
| 2ALDA | <a href="#">CYS72(C)</a>  | 4.04 | <a href="#">GLY28(N)</a>  | 2ALDA |                                                                                                               | C[ ] ... N[ ] |
| 2ALDA | <a href="#">CYS72(C)</a>  | 4.61 | <a href="#">GLY28(O)</a>  | 2ALDA |                                                                                                               |               |
| 2ALDA | <a href="#">CYS72(O)</a>  | 2.93 | <a href="#">GLY28(N)</a>  | 2ALDA | <b>H-bond</b> [D-A-AA]:149.9° [A-D-DD]:124.2° d_planarity:-16.0° a_planarity:64.1°                            | O[ ] ... N[ ] |
| 2ALDA | <a href="#">CYS72(O)</a>  | 3.95 | <a href="#">GLY28(CA)</a> | 2ALDA |                                                                                                               | O[ ] ... C[ ] |
| 2ALDA | <a href="#">CYS72(O)</a>  | 4.09 | <a href="#">GLY28(C)</a>  | 2ALDA |                                                                                                               | O[ ] ... C[ ] |
| 2ALDA | <a href="#">CYS72(O)</a>  | 3.82 | <a href="#">GLY28(O)</a>  | 2ALDA |                                                                                                               | O[ ] ... O[ ] |
| 2ALDA | <a href="#">CYS72(N)</a>  | 4.74 | <a href="#">ARG68(O)</a>  | 2ALDA | [D-A-AA]:122.3° [A-D-DD]:104.8° d_planarity:-39.9° a_planarity:34.2°, <b>maximum distance exceeded</b>        |               |
| 2ALDA | <a href="#">CYS72(CB)</a> | 4.54 | <a href="#">ARG68(O)</a>  | 2ALDA |                                                                                                               |               |
| 2ALDA | <a href="#">CYS72(SG)</a> | 4.68 | <a href="#">ARG68(C)</a>  | 2ALDA |                                                                                                               |               |
| 2ALDA | <a href="#">CYS72(SG)</a> | 3.55 | <a href="#">ARG68(O)</a>  | 2ALDA | Weakly positive                                                                                               | S[ ] ... O[ ] |
| 2ALDA | <a href="#">CYS72(N)</a>  | 4.61 | <a href="#">VAL69(CA)</a> | 2ALDA |                                                                                                               |               |
| 2ALDA | <a href="#">CYS72(N)</a>  | 3.69 | <a href="#">VAL69(C)</a>  | 2ALDA |                                                                                                               | N[ ] ... C[ ] |
| 2ALDA | <a href="#">CYS72(N)</a>  | 2.82 | <a href="#">VAL69(O)</a>  | 2ALDA | <b>H-bond</b> [D-A-AA]:126.6° [A-D-DD]:100.8° d_planarity:-19.6° a_planarity:78.8°                            | N[ ] ... O[ ] |
| 2ALDA | <a href="#">CYS72(CA)</a> | 4.44 | <a href="#">VAL69(C)</a>  | 2ALDA |                                                                                                               | C[ ] ... C[ ] |
| 2ALDA | <a href="#">CYS72(CA)</a> | 3.41 | <a href="#">VAL69(O)</a>  | 2ALDA |                                                                                                               | C[ ] ... O[ ] |
| 2ALDA | <a href="#">CYS72(C)</a>  | 4.96 | <a href="#">VAL69(C)</a>  | 2ALDA |                                                                                                               |               |
| 2ALDA | <a href="#">CYS72(C)</a>  | 3.75 | <a href="#">VAL69(O)</a>  | 2ALDA |                                                                                                               | C[ ] ... O[ ] |
| 2ALDA | <a href="#">CYS72(O)</a>  | 4.90 | <a href="#">VAL69(O)</a>  | 2ALDA |                                                                                                               |               |
| 2ALDA | <a href="#">CYS72(CB)</a> | 4.30 | <a href="#">VAL69(CA)</a> | 2ALDA |                                                                                                               | C[ ] ... C[ ] |
| 2ALDA | <a href="#">CYS72(CB)</a> | 4.10 | <a href="#">VAL69(C)</a>  | 2ALDA |                                                                                                               | C[ ] ... C[ ] |
| 2ALDA | <a href="#">CYS72(CB)</a> | 3.25 | <a href="#">VAL69(O)</a>  | 2ALDA |                                                                                                               | C[ ] ... O[ ] |
| 2ALDA | <a href="#">CYS72(SG)</a> | 4.41 | <a href="#">VAL69(CA)</a> | 2ALDA |                                                                                                               | S[ ] ... C[ ] |
| 2ALDA | <a href="#">CYS72(SG)</a> | 4.54 | <a href="#">VAL69(C)</a>  | 2ALDA |                                                                                                               |               |
| 2ALDA | <a href="#">CYS72(SG)</a> | 4.11 | <a href="#">VAL69(O)</a>  | 2ALDA |                                                                                                               | S[ ] ... O[ ] |
| 2ALDA | <a href="#">CYS72(N)</a>  | 4.20 | <a href="#">ASN70(N)</a>  | 2ALDA |                                                                                                               | N[ ] ... N[ ] |
| 2ALDA | <a href="#">CYS72(N)</a>  | 4.17 | <a href="#">ASN70(CA)</a> | 2ALDA |                                                                                                               | N[ ] ... C[ ] |
| 2ALDA | <a href="#">CYS72(N)</a>  | 3.17 | <a href="#">ASN70(C)</a>  | 2ALDA |                                                                                                               | N[ ] ... C[ ] |
| 2ALDA | <a href="#">CYS72(N)</a>  | 3.42 | <a href="#">ASN70(O)</a>  | 2ALDA | [D-A-AA]:67.9° [A-D-DD]:136.8° d_planarity:-86.0° a_planarity:51.7°, <b>bad a_angle(sp2), bad d_planarity</b> | N[ ] ... O[ ] |
| 2ALDA | <a href="#">CYS72(CA)</a> | 4.51 | <a href="#">ASN70(C)</a>  | 2ALDA |                                                                                                               |               |
| 2ALDA | <a href="#">CYS72(CA)</a> | 4.60 | <a href="#">ASN70(O)</a>  | 2ALDA |                                                                                                               |               |
| 2ALDA | <a href="#">CYS72(C)</a>  | 4.91 | <a href="#">ASN70(C)</a>  | 2ALDA |                                                                                                               |               |
| 2ALDA | <a href="#">CYS72(C)</a>  | 4.65 | <a href="#">ASN70(O)</a>  | 2ALDA |                                                                                                               |               |
| 2ALDA | <a href="#">CYS72(N)</a>  | 2.62 | <a href="#">PRO71(N)</a>  | 2ALDA |                                                                                                               | N[ ] ... N[ ] |
| 2ALDA | <a href="#">CYS72(N)</a>  | 2.44 | <a href="#">PRO71(CA)</a> | 2ALDA |                                                                                                               | N[ ] ... C[ ] |
| 2ALDA | <a href="#">CYS72(N)</a>  | 2.29 | <a href="#">PRO71(O)</a>  | 2ALDA | [D-A-AA]:28.6° [A-D-DD]:93.6° d_planarity:4.0° a_planarity:11.7°, <b>bad a_angle(sp2)</b>                     | N[ ] ... O[ ] |
| 2ALDA | <a href="#">CYS72(N)</a>  | 3.31 | <a href="#">PRO71(CB)</a> | 2ALDA |                                                                                                               | N[ ] ... C[ ] |
| 2ALDA | <a href="#">CYS72(N)</a>  | 3.93 | <a href="#">PRO71(CG)</a> | 2ALDA |                                                                                                               | N[ ] ... C[ ] |
| 2ALDA | <a href="#">CYS72(N)</a>  | 3.42 | <a href="#">PRO71(CD)</a> | 2ALDA |                                                                                                               | N[ ] ... C[ ] |
| 2ALDA | <a href="#">CYS72(CA)</a> | 4.08 | <a href="#">PRO71(N)</a>  | 2ALDA |                                                                                                               | C[ ] ... N[ ] |
| 2ALDA | <a href="#">CYS72(CA)</a> | 3.80 | <a href="#">PRO71(CA)</a> | 2ALDA |                                                                                                               | C[ ] ... C[ ] |
| 2ALDA | <a href="#">CYS72(CA)</a> | 2.43 | <a href="#">PRO71(C)</a>  | 2ALDA |                                                                                                               | C[ ] ... C[ ] |
| 2ALDA | <a href="#">CYS72(CA)</a> | 2.79 | <a href="#">PRO71(O)</a>  | 2ALDA |                                                                                                               | C[ ] ... O[ ] |

|       |                            |      |                             |       |                                                                                                    |               |
|-------|----------------------------|------|-----------------------------|-------|----------------------------------------------------------------------------------------------------|---------------|
| 2ALDA | <a href="#">CYS72</a> (CA) | 4.52 | <a href="#">PRO71</a> (CB)  | 2ALDA |                                                                                                    |               |
| 2ALDA | <a href="#">CYS72</a> (CA) | 4.80 | <a href="#">PRO71</a> (CD)  | 2ALDA |                                                                                                    |               |
| 2ALDA | <a href="#">CYS72</a> (C)  | 4.85 | <a href="#">PRO71</a> (N)   | 2ALDA |                                                                                                    |               |
| 2ALDA | <a href="#">CYS72</a> (C)  | 4.61 | <a href="#">PRO71</a> (CA)  | 2ALDA |                                                                                                    |               |
| 2ALDA | <a href="#">CYS72</a> (C)  | 3.26 | <a href="#">PRO71</a> (C)   | 2ALDA |                                                                                                    | C[ ] ... C[ ] |
| 2ALDA | <a href="#">CYS72</a> (C)  | 3.51 | <a href="#">PRO71</a> (O)   | 2ALDA |                                                                                                    | C[ ] ... O[ ] |
| 2ALDA | <a href="#">CYS72</a> (O)  | 4.23 | <a href="#">PRO71</a> (C)   | 2ALDA |                                                                                                    | O[ ] ... C[ ] |
| 2ALDA | <a href="#">CYS72</a> (O)  | 4.17 | <a href="#">PRO71</a> (O)   | 2ALDA |                                                                                                    | O[ ] ... O[ ] |
| 2ALDA | <a href="#">CYS72</a> (CB) | 4.79 | <a href="#">PRO71</a> (N)   | 2ALDA |                                                                                                    |               |
| 2ALDA | <a href="#">CYS72</a> (CB) | 4.86 | <a href="#">PRO71</a> (CA)  | 2ALDA |                                                                                                    |               |
| 2ALDA | <a href="#">CYS72</a> (CB) | 3.69 | <a href="#">PRO71</a> (C)   | 2ALDA |                                                                                                    | C[ ] ... C[ ] |
| 2ALDA | <a href="#">CYS72</a> (CB) | 4.20 | <a href="#">PRO71</a> (O)   | 2ALDA |                                                                                                    | C[ ] ... O[ ] |
| 2ALDA | <a href="#">CYS72</a> (SG) | 4.15 | <a href="#">PRO71</a> (C)   | 2ALDA |                                                                                                    | S[ ] ... C[ ] |
| 2ALDA | <a href="#">CYS72</a> (SG) | 4.62 | <a href="#">PRO71</a> (O)   | 2ALDA |                                                                                                    |               |
| 2ALDA | <a href="#">CYS72</a> (SG) | 4.89 | <a href="#">PRO71</a> (CD)  | 2ALDA |                                                                                                    |               |
| 2ALDA | <a href="#">CYS72</a> (N)  | 2.80 | <a href="#">ILE73</a> (N)   | 2ALDA |                                                                                                    | N[ ] ... N[ ] |
| 2ALDA | <a href="#">CYS72</a> (N)  | 4.25 | <a href="#">ILE73</a> (CA)  | 2ALDA |                                                                                                    | N[ ] ... C[ ] |
| 2ALDA | <a href="#">CYS72</a> (N)  | 4.91 | <a href="#">ILE73</a> (C)   | 2ALDA |                                                                                                    |               |
| 2ALDA | <a href="#">CYS72</a> (N)  | 4.97 | <a href="#">ILE73</a> (CB)  | 2ALDA |                                                                                                    |               |
| 2ALDA | <a href="#">CYS72</a> (CA) | 2.44 | <a href="#">ILE73</a> (N)   | 2ALDA |                                                                                                    | C[ ] ... N[ ] |
| 2ALDA | <a href="#">CYS72</a> (CA) | 3.81 | <a href="#">ILE73</a> (CA)  | 2ALDA |                                                                                                    | C[ ] ... C[ ] |
| 2ALDA | <a href="#">CYS72</a> (CA) | 4.76 | <a href="#">ILE73</a> (C)   | 2ALDA |                                                                                                    |               |
| 2ALDA | <a href="#">CYS72</a> (CA) | 4.65 | <a href="#">ILE73</a> (CB)  | 2ALDA |                                                                                                    |               |
| 2ALDA | <a href="#">CYS72</a> (CA) | 4.61 | <a href="#">ILE73</a> (CG1) | 2ALDA |                                                                                                    |               |
| 2ALDA | <a href="#">CYS72</a> (CA) | 4.69 | <a href="#">ILE73</a> (CD1) | 2ALDA |                                                                                                    |               |
| 2ALDA | <a href="#">CYS72</a> (C)  | 2.41 | <a href="#">ILE73</a> (CA)  | 2ALDA |                                                                                                    | C[ ] ... C[ ] |
| 2ALDA | <a href="#">CYS72</a> (C)  | 3.42 | <a href="#">ILE73</a> (C)   | 2ALDA |                                                                                                    | C[ ] ... C[ ] |
| 2ALDA | <a href="#">CYS72</a> (C)  | 4.18 | <a href="#">ILE73</a> (O)   | 2ALDA |                                                                                                    | C[ ] ... O[ ] |
| 2ALDA | <a href="#">CYS72</a> (C)  | 3.48 | <a href="#">ILE73</a> (CB)  | 2ALDA |                                                                                                    | C[ ] ... C[ ] |
| 2ALDA | <a href="#">CYS72</a> (C)  | 3.66 | <a href="#">ILE73</a> (CG1) | 2ALDA |                                                                                                    | C[ ] ... C[ ] |
| 2ALDA | <a href="#">CYS72</a> (C)  | 4.82 | <a href="#">ILE73</a> (CG2) | 2ALDA |                                                                                                    |               |
| 2ALDA | <a href="#">CYS72</a> (C)  | 3.70 | <a href="#">ILE73</a> (CD1) | 2ALDA |                                                                                                    | C[ ] ... C[ ] |
| 2ALDA | <a href="#">CYS72</a> (O)  | 2.23 | <a href="#">ILE73</a> (N)   | 2ALDA | [D-A-AA]:30.8° [A-D-DD]:90.4° d_planarity:0.2°<br>a_planarity:7.7°, bad a_angle(sp2)               | O[ ] ... N[ ] |
| 2ALDA | <a href="#">CYS72</a> (O)  | 2.68 | <a href="#">ILE73</a> (CA)  | 2ALDA |                                                                                                    | O[ ] ... C[ ] |
| 2ALDA | <a href="#">CYS72</a> (O)  | 3.65 | <a href="#">ILE73</a> (C)   | 2ALDA |                                                                                                    | O[ ] ... C[ ] |
| 2ALDA | <a href="#">CYS72</a> (O)  | 4.66 | <a href="#">ILE73</a> (O)   | 2ALDA |                                                                                                    |               |
| 2ALDA | <a href="#">CYS72</a> (O)  | 3.88 | <a href="#">ILE73</a> (CB)  | 2ALDA |                                                                                                    | O[ ] ... C[ ] |
| 2ALDA | <a href="#">CYS72</a> (O)  | 3.97 | <a href="#">ILE73</a> (CG1) | 2ALDA |                                                                                                    | O[ ] ... C[ ] |
| 2ALDA | <a href="#">CYS72</a> (O)  | 3.59 | <a href="#">ILE73</a> (CD1) | 2ALDA |                                                                                                    | O[ ] ... C[ ] |
| 2ALDA | <a href="#">CYS72</a> (CB) | 3.16 | <a href="#">ILE73</a> (N)   | 2ALDA |                                                                                                    | C[ ] ... N[ ] |
| 2ALDA | <a href="#">CYS72</a> (CB) | 4.40 | <a href="#">ILE73</a> (CA)  | 2ALDA |                                                                                                    | C[ ] ... C[ ] |
| 2ALDA | <a href="#">CYS72</a> (CB) | 4.83 | <a href="#">ILE73</a> (CB)  | 2ALDA |                                                                                                    |               |
| 2ALDA | <a href="#">CYS72</a> (CB) | 4.30 | <a href="#">ILE73</a> (CG1) | 2ALDA |                                                                                                    | C[ ] ... C[ ] |
| 2ALDA | <a href="#">CYS72</a> (CB) | 4.24 | <a href="#">ILE73</a> (CD1) | 2ALDA |                                                                                                    | C[ ] ... C[ ] |
| 2ALDA | <a href="#">CYS72</a> (SG) | 4.85 | <a href="#">ILE73</a> (N)   | 2ALDA | [D-A-AA]:18.0° [A-D-DD]:150.5° d_planarity:57.8°<br>maximum distance exceeded, bad a_angle(sp3)    |               |
| 2ALDA | <a href="#">CYS72</a> (C)  | 4.00 | <a href="#">GLY74</a> (N)   | 2ALDA |                                                                                                    | C[ ] ... N[ ] |
| 2ALDA | <a href="#">CYS72</a> (O)  | 3.86 | <a href="#">GLY74</a> (N)   | 2ALDA | [D-A-AA]:87.4° [A-D-DD]:153.9° d_planarity:-74.1°<br>a_planarity:25.5°, maximum distance exceeded, | O[ ] ... N[ ] |

|       |                           |      |                             |       |                                                                                               |               |
|-------|---------------------------|------|-----------------------------|-------|-----------------------------------------------------------------------------------------------|---------------|
|       |                           |      |                             |       | bad a_angle(sp2), bad d_planarity                                                             |               |
| 2ALDA | <a href="#">CYS72(C)</a>  | 4.65 | <a href="#">PHE299(CZ)</a>  | 2ALDA |                                                                                               |               |
| 2ALDA | <a href="#">CYS72(O)</a>  | 4.31 | <a href="#">PHE299(CE1)</a> | 2ALDA |                                                                                               | O[ ] ... C[ ] |
| 2ALDA | <a href="#">CYS72(O)</a>  | 4.45 | <a href="#">PHE299(CE2)</a> | 2ALDA |                                                                                               | O[ ] ... C[ ] |
| 2ALDA | <a href="#">CYS72(O)</a>  | 3.60 | <a href="#">PHE299(CZ)</a>  | 2ALDA |                                                                                               | O[ ] ... C[ ] |
| 2ALDA | <a href="#">CYS72(CA)</a> | 4.96 | <a href="#">ALA331(O)</a>   | 2ALDA |                                                                                               |               |
| 2ALDA | <a href="#">CYS72(CB)</a> | 4.69 | <a href="#">ALA331(CA)</a>  | 2ALDA |                                                                                               |               |
| 2ALDA | <a href="#">CYS72(CB)</a> | 4.20 | <a href="#">ALA331(C)</a>   | 2ALDA |                                                                                               | C[ ] ... C[ ] |
| 2ALDA | <a href="#">CYS72(CB)</a> | 3.80 | <a href="#">ALA331(O)</a>   | 2ALDA |                                                                                               | C[ ] ... O[ ] |
| 2ALDA | <a href="#">CYS72(CB)</a> | 4.11 | <a href="#">ALA331(CB)</a>  | 2ALDA |                                                                                               | C[ ] ... C[ ] |
| 2ALDA | <a href="#">CYS72(SG)</a> | 4.88 | <a href="#">ALA331(CA)</a>  | 2ALDA |                                                                                               |               |
| 2ALDA | <a href="#">CYS72(SG)</a> | 3.93 | <a href="#">ALA331(C)</a>   | 2ALDA |                                                                                               | S[ ] ... C[ ] |
| 2ALDA | <a href="#">CYS72(SG)</a> | 3.67 | <a href="#">ALA331(O)</a>   | 2ALDA |                                                                                               | S[ ] ... O[ ] |
| 2ALDA | <a href="#">CYS72(SG)</a> | 4.55 | <a href="#">ALA331(CB)</a>  | 2ALDA |                                                                                               |               |
| 2ALDA | <a href="#">CYS72(CB)</a> | 4.98 | <a href="#">LEU332(N)</a>   | 2ALDA |                                                                                               |               |
| 2ALDA | <a href="#">CYS72(SG)</a> | 4.24 | <a href="#">LEU332(N)</a>   | 2ALDA | [D-A-AA]:102.9° [A-D-DD]:70.8° d_planarity:49.4°, maximum distance exceeded, bad d_angle(sp2) | S[ ] ... N[ ] |
| 2ALDA | <a href="#">CYS72(SG)</a> | 4.01 | <a href="#">LEU332(CA)</a>  | 2ALDA |                                                                                               | S[ ] ... C[ ] |
| 2ALDA | <a href="#">CYS72(SG)</a> | 4.93 | <a href="#">LEU332(C)</a>   | 2ALDA |                                                                                               |               |
| 2ALDA | <a href="#">CYS72(SG)</a> | 4.88 | <a href="#">LEU332(O)</a>   | 2ALDA |                                                                                               |               |
| 2ALDA | <a href="#">CYS72(SG)</a> | 4.88 | <a href="#">LEU332(CB)</a>  | 2ALDA |                                                                                               |               |
| 2ALDA | <a href="#">CYS72(SG)</a> | 4.46 | <a href="#">LEU332(CG)</a>  | 2ALDA |                                                                                               | S[ ] ... C[ ] |
| 2ALDA | <a href="#">CYS72(SG)</a> | 3.60 | <a href="#">LEU332(CD2)</a> | 2ALDA |                                                                                               | S[ ] ... C[ ] |
| 2ALDA | <a href="#">CYS72(N)</a>  | 4.80 | <a href="#">SER335(OG)</a>  | 2ALDA | [D-A-AA]:94.1° [A-D-DD]:51.9° d_planarity:55.2°, maximum distance exceeded, bad d_angle(sp2)  |               |
| 2ALDA | <a href="#">CYS72(CA)</a> | 4.09 | <a href="#">SER335(CB)</a>  | 2ALDA |                                                                                               | C[ ] ... C[ ] |
| 2ALDA | <a href="#">CYS72(CA)</a> | 4.06 | <a href="#">SER335(OG)</a>  | 2ALDA |                                                                                               | C[ ] ... O[ ] |
| 2ALDA | <a href="#">CYS72(C)</a>  | 5.00 | <a href="#">SER335(CB)</a>  | 2ALDA |                                                                                               |               |
| 2ALDA | <a href="#">CYS72(O)</a>  | 4.85 | <a href="#">SER335(CB)</a>  | 2ALDA |                                                                                               |               |
| 2ALDA | <a href="#">CYS72(CB)</a> | 3.93 | <a href="#">SER335(CB)</a>  | 2ALDA |                                                                                               | C[ ] ... C[ ] |
| 2ALDA | <a href="#">CYS72(CB)</a> | 4.36 | <a href="#">SER335(OG)</a>  | 2ALDA |                                                                                               | C[ ] ... O[ ] |
| 2ALDA | <a href="#">CYS72(SG)</a> | 4.86 | <a href="#">SER335(CA)</a>  | 2ALDA |                                                                                               |               |
| 2ALDA | <a href="#">CYS72(SG)</a> | 3.48 | <a href="#">SER335(CB)</a>  | 2ALDA |                                                                                               | S[ ] ... C[ ] |
| 2ALDA | <a href="#">CYS72(SG)</a> | 3.87 | <a href="#">SER335(OG)</a>  | 2ALDA | [D-A-AA]:92.9° [A-D-DD]:63.4°, maximum distance exceeded                                      | S[ ] ... O[ ] |

| chain1 | res1/atm1                  | distance | res2/atm2                  | chain2 | H-bonding                                                                                                                                          | Charge interaction |
|--------|----------------------------|----------|----------------------------|--------|----------------------------------------------------------------------------------------------------------------------------------------------------|--------------------|
| 2ALDA  | <a href="#">CYS239(N)</a>  | 4.81     | <a href="#">GLY194(C)</a>  | 2ALDA  |                                                                                                                                                    |                    |
| 2ALDA  | <a href="#">CYS239(N)</a>  | 3.99     | <a href="#">GLY194(O)</a>  | 2ALDA  | [D-A-AA]:125.2° [A-D-DD]:124.9° d_planarity:-69.8° a_planarity:19.5°, maximum distance exceeded, bad d_planarity                                   | N[ ] ... O[ ]      |
| 2ALDA  | <a href="#">CYS239(CA)</a> | 4.97     | <a href="#">GLY194(O)</a>  | 2ALDA  |                                                                                                                                                    |                    |
| 2ALDA  | <a href="#">CYS239(N)</a>  | 4.81     | <a href="#">ASP195(N)</a>  | 2ALDA  |                                                                                                                                                    |                    |
| 2ALDA  | <a href="#">CYS239(N)</a>  | 3.83     | <a href="#">ASP195(CA)</a> | 2ALDA  |                                                                                                                                                    | N[ ] ... C[ ]      |
| 2ALDA  | <a href="#">CYS239(N)</a>  | 4.44     | <a href="#">ASP195(C)</a>  | 2ALDA  |                                                                                                                                                    | N[ ] ... C[ ]      |
| 2ALDA  | <a href="#">CYS239(N)</a>  | 4.58     | <a href="#">ASP195(O)</a>  | 2ALDA  | [D-A-AA]:75.8° [A-D-DD]:60.6° d_planarity:89.8° a_planarity:-51.2°, maximum distance exceeded, bad a_angle(sp2), bad d_angle(sp2), bad d_planarity |                    |



|       |                            |      |                            |       |                                                                                                                                         |               |
|-------|----------------------------|------|----------------------------|-------|-----------------------------------------------------------------------------------------------------------------------------------------|---------------|
| 2ALDA | <a href="#">CYS239(N)</a>  | 4.16 | <a href="#">ASP195(CB)</a> | 2ALDA |                                                                                                                                         | N[ ] ... C[ ] |
| 2ALDA | <a href="#">CYS239(CA)</a> | 4.13 | <a href="#">ASP195(CA)</a> | 2ALDA |                                                                                                                                         | C[ ] ... C[ ] |
| 2ALDA | <a href="#">CYS239(CA)</a> | 4.30 | <a href="#">ASP195(C)</a>  | 2ALDA |                                                                                                                                         | C[ ] ... C[ ] |
| 2ALDA | <a href="#">CYS239(CA)</a> | 4.07 | <a href="#">ASP195(O)</a>  | 2ALDA |                                                                                                                                         | C[ ] ... O[ ] |
| 2ALDA | <a href="#">CYS239(CA)</a> | 4.32 | <a href="#">ASP195(CB)</a> | 2ALDA |                                                                                                                                         | C[ ] ... C[ ] |
| 2ALDA | <a href="#">CYS239(CB)</a> | 4.62 | <a href="#">ASP195(CA)</a> | 2ALDA |                                                                                                                                         |               |
| 2ALDA | <a href="#">CYS239(CB)</a> | 4.37 | <a href="#">ASP195(C)</a>  | 2ALDA |                                                                                                                                         | C[ ] ... C[ ] |
| 2ALDA | <a href="#">CYS239(CB)</a> | 4.16 | <a href="#">ASP195(O)</a>  | 2ALDA |                                                                                                                                         | C[ ] ... O[ ] |
| 2ALDA | <a href="#">CYS239(SG)</a> | 4.95 | <a href="#">ASP195(C)</a>  | 2ALDA |                                                                                                                                         |               |
| 2ALDA | <a href="#">CYS239(SG)</a> | 4.33 | <a href="#">ASP195(O)</a>  | 2ALDA | Weakly negative                                                                                                                         | S[ ] ... O[ ] |
| 2ALDA | <a href="#">CYS239(CA)</a> | 4.62 | <a href="#">HIS196(O)</a>  | 2ALDA |                                                                                                                                         |               |
| 2ALDA | <a href="#">CYS239(CB)</a> | 4.88 | <a href="#">HIS196(N)</a>  | 2ALDA |                                                                                                                                         |               |
| 2ALDA | <a href="#">CYS239(CB)</a> | 4.32 | <a href="#">HIS196(C)</a>  | 2ALDA |                                                                                                                                         | C[ ] ... C[ ] |
| 2ALDA | <a href="#">CYS239(CB)</a> | 3.54 | <a href="#">HIS196(O)</a>  | 2ALDA |                                                                                                                                         | C[ ] ... O[ ] |
| 2ALDA | <a href="#">CYS239(SG)</a> | 4.24 | <a href="#">HIS196(C)</a>  | 2ALDA |                                                                                                                                         | S[ ] ... C[ ] |
| 2ALDA | <a href="#">CYS239(SG)</a> | 3.81 | <a href="#">HIS196(O)</a>  | 2ALDA | Weakly positive                                                                                                                         | S[ ] ... O[ ] |
| 2ALDA | <a href="#">CYS239(CB)</a> | 4.91 | <a href="#">ASP197(N)</a>  | 2ALDA |                                                                                                                                         |               |
| 2ALDA | <a href="#">CYS239(CB)</a> | 4.78 | <a href="#">ASP197(CA)</a> | 2ALDA |                                                                                                                                         |               |
| 2ALDA | <a href="#">CYS239(SG)</a> | 4.34 | <a href="#">ASP197(N)</a>  | 2ALDA | [D-A-AA]:97.3° [A-D-DD]:61.9° d_planarity:49.2°,<br>maximum distance exceeded, bad d_angle(sp2)                                         | S[ ] ... N[ ] |
| 2ALDA | <a href="#">CYS239(SG)</a> | 3.87 | <a href="#">ASP197(CA)</a> | 2ALDA |                                                                                                                                         | S[ ] ... C[ ] |
| 2ALDA | <a href="#">CYS239(SG)</a> | 4.22 | <a href="#">ASP197(CB)</a> | 2ALDA | Negative                                                                                                                                | S[ ] ... C[ ] |
| 2ALDA | <a href="#">CYS239(CB)</a> | 4.78 | <a href="#">PRO235(CA)</a> | 2ALDA |                                                                                                                                         |               |
| 2ALDA | <a href="#">CYS239(CB)</a> | 4.66 | <a href="#">PRO235(C)</a>  | 2ALDA |                                                                                                                                         |               |
| 2ALDA | <a href="#">CYS239(CB)</a> | 3.90 | <a href="#">PRO235(CB)</a> | 2ALDA |                                                                                                                                         | C[ ] ... C[ ] |
| 2ALDA | <a href="#">CYS239(CB)</a> | 4.81 | <a href="#">PRO235(CG)</a> | 2ALDA |                                                                                                                                         |               |
| 2ALDA | <a href="#">CYS239(SG)</a> | 4.10 | <a href="#">PRO235(CB)</a> | 2ALDA |                                                                                                                                         | S[ ] ... C[ ] |
| 2ALDA | <a href="#">CYS239(N)</a>  | 4.94 | <a href="#">GLY236(N)</a>  | 2ALDA |                                                                                                                                         |               |
| 2ALDA | <a href="#">CYS239(N)</a>  | 4.56 | <a href="#">GLY236(CA)</a> | 2ALDA |                                                                                                                                         |               |
| 2ALDA | <a href="#">CYS239(N)</a>  | 3.76 | <a href="#">GLY236(C)</a>  | 2ALDA |                                                                                                                                         | N[ ] ... C[ ] |
| 2ALDA | <a href="#">CYS239(N)</a>  | 3.11 | <a href="#">GLY236(O)</a>  | 2ALDA | <b>H-bond</b> [D-A-AA]:113.8° [A-D-DD]:106.5° d_planarity:-5.4°<br>a_planarity:86.5°                                                    | N[ ] ... O[ ] |
| 2ALDA | <a href="#">CYS239(CA)</a> | 4.58 | <a href="#">GLY236(C)</a>  | 2ALDA |                                                                                                                                         |               |
| 2ALDA | <a href="#">CYS239(CA)</a> | 3.79 | <a href="#">GLY236(O)</a>  | 2ALDA |                                                                                                                                         | C[ ] ... O[ ] |
| 2ALDA | <a href="#">CYS239(C)</a>  | 4.65 | <a href="#">GLY236(O)</a>  | 2ALDA |                                                                                                                                         |               |
| 2ALDA | <a href="#">CYS239(O)</a>  | 4.38 | <a href="#">GLY236(O)</a>  | 2ALDA |                                                                                                                                         | O[ ] ... O[ ] |
| 2ALDA | <a href="#">CYS239(CB)</a> | 4.06 | <a href="#">GLY236(N)</a>  | 2ALDA |                                                                                                                                         | C[ ] ... N[ ] |
| 2ALDA | <a href="#">CYS239(CB)</a> | 4.45 | <a href="#">GLY236(CA)</a> | 2ALDA |                                                                                                                                         | C[ ] ... C[ ] |
| 2ALDA | <a href="#">CYS239(CB)</a> | 4.17 | <a href="#">GLY236(C)</a>  | 2ALDA |                                                                                                                                         | C[ ] ... C[ ] |
| 2ALDA | <a href="#">CYS239(CB)</a> | 3.34 | <a href="#">GLY236(O)</a>  | 2ALDA |                                                                                                                                         | C[ ] ... O[ ] |
| 2ALDA | <a href="#">CYS239(N)</a>  | 4.31 | <a href="#">HIS237(N)</a>  | 2ALDA |                                                                                                                                         | N[ ] ... N[ ] |
| 2ALDA | <a href="#">CYS239(N)</a>  | 4.39 | <a href="#">HIS237(CA)</a> | 2ALDA |                                                                                                                                         | N[ ] ... C[ ] |
| 2ALDA | <a href="#">CYS239(N)</a>  | 3.31 | <a href="#">HIS237(C)</a>  | 2ALDA |                                                                                                                                         | N[ ] ... C[ ] |
| 2ALDA | <a href="#">CYS239(N)</a>  | 3.59 | <a href="#">HIS237(O)</a>  | 2ALDA | [D-A-AA]:66.8° [A-D-DD]:144.0° d_planarity:-68.9°<br>a_planarity:44.2°, maximum distance exceeded,<br>bad a_angle(sp2), bad d_planarity | N[ ] ... O[ ] |
| 2ALDA | <a href="#">CYS239(CA)</a> | 4.68 | <a href="#">HIS237(C)</a>  | 2ALDA |                                                                                                                                         |               |
| 2ALDA | <a href="#">CYS239(CA)</a> | 4.85 | <a href="#">HIS237(O)</a>  | 2ALDA |                                                                                                                                         |               |
| 2ALDA | <a href="#">CYS239(O)</a>  | 4.94 | <a href="#">HIS237(C)</a>  | 2ALDA |                                                                                                                                         |               |
| 2ALDA | <a href="#">CYS239(O)</a>  | 4.52 | <a href="#">HIS237(O)</a>  | 2ALDA |                                                                                                                                         |               |

|       |                            |      |                             |       |                                                                                                                                                          |                 |
|-------|----------------------------|------|-----------------------------|-------|----------------------------------------------------------------------------------------------------------------------------------------------------------|-----------------|
| 2ALDA | <a href="#">CYS239(N)</a>  | 2.65 | <a href="#">ALA238(N)</a>   | 2ALDA |                                                                                                                                                          | N [ ] ... N [ ] |
| 2ALDA | <a href="#">CYS239(N)</a>  | 2.43 | <a href="#">ALA238(CA)</a>  | 2ALDA |                                                                                                                                                          | N [ ] ... C [ ] |
| 2ALDA | <a href="#">CYS239(N)</a>  | 2.27 | <a href="#">ALA238(O)</a>   | 2ALDA | [D-A-AA]:29.0° [A-D-DD]:94.4° d_planarity:6.0°<br>a_planarity:12.7°, bad a_angle(sp2)                                                                    | N [ ] ... O [ ] |
| 2ALDA | <a href="#">CYS239(N)</a>  | 3.53 | <a href="#">ALA238(CB)</a>  | 2ALDA |                                                                                                                                                          | N [ ] ... C [ ] |
| 2ALDA | <a href="#">CYS239(CA)</a> | 4.10 | <a href="#">ALA238(N)</a>   | 2ALDA |                                                                                                                                                          | C [ ] ... N [ ] |
| 2ALDA | <a href="#">CYS239(CA)</a> | 3.79 | <a href="#">ALA238(CA)</a>  | 2ALDA |                                                                                                                                                          | C [ ] ... C [ ] |
| 2ALDA | <a href="#">CYS239(CA)</a> | 2.42 | <a href="#">ALA238(C)</a>   | 2ALDA |                                                                                                                                                          | C [ ] ... C [ ] |
| 2ALDA | <a href="#">CYS239(CA)</a> | 2.79 | <a href="#">ALA238(O)</a>   | 2ALDA |                                                                                                                                                          | C [ ] ... O [ ] |
| 2ALDA | <a href="#">CYS239(CA)</a> | 4.74 | <a href="#">ALA238(CB)</a>  | 2ALDA |                                                                                                                                                          |                 |
| 2ALDA | <a href="#">CYS239(C)</a>  | 4.89 | <a href="#">ALA238(N)</a>   | 2ALDA |                                                                                                                                                          |                 |
| 2ALDA | <a href="#">CYS239(C)</a>  | 4.36 | <a href="#">ALA238(CA)</a>  | 2ALDA |                                                                                                                                                          | C [ ] ... C [ ] |
| 2ALDA | <a href="#">CYS239(C)</a>  | 2.99 | <a href="#">ALA238(C)</a>   | 2ALDA |                                                                                                                                                          | C [ ] ... C [ ] |
| 2ALDA | <a href="#">CYS239(C)</a>  | 3.12 | <a href="#">ALA238(O)</a>   | 2ALDA |                                                                                                                                                          | C [ ] ... O [ ] |
| 2ALDA | <a href="#">CYS239(O)</a>  | 4.88 | <a href="#">ALA238(N)</a>   | 2ALDA | [D-A-AA]:83.4° [A-D-DD]:66.5° d_planarity:66.3°<br>a_planarity:-38.1°, maximum distance exceeded,<br>bad a_angle(sp2), bad d_angle(sp2), bad d_planarity |                 |
| 2ALDA | <a href="#">CYS239(O)</a>  | 4.50 | <a href="#">ALA238(CA)</a>  | 2ALDA |                                                                                                                                                          |                 |
| 2ALDA | <a href="#">CYS239(O)</a>  | 3.41 | <a href="#">ALA238(C)</a>   | 2ALDA |                                                                                                                                                          | O [ ] ... C [ ] |
| 2ALDA | <a href="#">CYS239(O)</a>  | 3.80 | <a href="#">ALA238(O)</a>   | 2ALDA |                                                                                                                                                          | O [ ] ... O [ ] |
| 2ALDA | <a href="#">CYS239(CB)</a> | 4.80 | <a href="#">ALA238(N)</a>   | 2ALDA |                                                                                                                                                          |                 |
| 2ALDA | <a href="#">CYS239(CB)</a> | 4.90 | <a href="#">ALA238(CA)</a>  | 2ALDA |                                                                                                                                                          |                 |
| 2ALDA | <a href="#">CYS239(CB)</a> | 3.74 | <a href="#">ALA238(C)</a>   | 2ALDA |                                                                                                                                                          | C [ ] ... C [ ] |
| 2ALDA | <a href="#">CYS239(CB)</a> | 4.29 | <a href="#">ALA238(O)</a>   | 2ALDA |                                                                                                                                                          | C [ ] ... O [ ] |
| 2ALDA | <a href="#">CYS239(N)</a>  | 3.50 | <a href="#">THR240(N)</a>   | 2ALDA |                                                                                                                                                          | N [ ] ... N [ ] |
| 2ALDA | <a href="#">CYS239(N)</a>  | 4.73 | <a href="#">THR240(CA)</a>  | 2ALDA |                                                                                                                                                          |                 |
| 2ALDA | <a href="#">CYS239(CA)</a> | 2.46 | <a href="#">THR240(N)</a>   | 2ALDA |                                                                                                                                                          | C [ ] ... N [ ] |
| 2ALDA | <a href="#">CYS239(CA)</a> | 3.82 | <a href="#">THR240(CA)</a>  | 2ALDA |                                                                                                                                                          | C [ ] ... C [ ] |
| 2ALDA | <a href="#">CYS239(CA)</a> | 4.60 | <a href="#">THR240(C)</a>   | 2ALDA |                                                                                                                                                          |                 |
| 2ALDA | <a href="#">CYS239(CA)</a> | 4.89 | <a href="#">THR240(CB)</a>  | 2ALDA |                                                                                                                                                          |                 |
| 2ALDA | <a href="#">CYS239(CA)</a> | 4.99 | <a href="#">THR240(OG1)</a> | 2ALDA |                                                                                                                                                          |                 |
| 2ALDA | <a href="#">CYS239(C)</a>  | 2.41 | <a href="#">THR240(CA)</a>  | 2ALDA |                                                                                                                                                          | C [ ] ... C [ ] |
| 2ALDA | <a href="#">CYS239(C)</a>  | 3.26 | <a href="#">THR240(C)</a>   | 2ALDA |                                                                                                                                                          | C [ ] ... C [ ] |
| 2ALDA | <a href="#">CYS239(C)</a>  | 4.13 | <a href="#">THR240(O)</a>   | 2ALDA |                                                                                                                                                          | C [ ] ... O [ ] |
| 2ALDA | <a href="#">CYS239(C)</a>  | 3.67 | <a href="#">THR240(CB)</a>  | 2ALDA |                                                                                                                                                          | C [ ] ... C [ ] |
| 2ALDA | <a href="#">CYS239(C)</a>  | 4.08 | <a href="#">THR240(OG1)</a> | 2ALDA |                                                                                                                                                          | C [ ] ... O [ ] |
| 2ALDA | <a href="#">CYS239(C)</a>  | 4.05 | <a href="#">THR240(CG2)</a> | 2ALDA |                                                                                                                                                          | C [ ] ... C [ ] |
| 2ALDA | <a href="#">CYS239(O)</a>  | 2.22 | <a href="#">THR240(N)</a>   | 2ALDA | [D-A-AA]:29.7° [A-D-DD]:94.1° d_planarity:2.4°<br>a_planarity:7.7°, bad a_angle(sp2)                                                                     | O [ ] ... N [ ] |
| 2ALDA | <a href="#">CYS239(O)</a>  | 2.74 | <a href="#">THR240(CA)</a>  | 2ALDA |                                                                                                                                                          | O [ ] ... C [ ] |
| 2ALDA | <a href="#">CYS239(O)</a>  | 3.34 | <a href="#">THR240(C)</a>   | 2ALDA |                                                                                                                                                          | O [ ] ... C [ ] |
| 2ALDA | <a href="#">CYS239(O)</a>  | 3.90 | <a href="#">THR240(O)</a>   | 2ALDA |                                                                                                                                                          | O [ ] ... O [ ] |
| 2ALDA | <a href="#">CYS239(O)</a>  | 4.17 | <a href="#">THR240(CB)</a>  | 2ALDA |                                                                                                                                                          | O [ ] ... C [ ] |
| 2ALDA | <a href="#">CYS239(O)</a>  | 4.88 | <a href="#">THR240(OG1)</a> | 2ALDA | [D-A-AA]:43.7° [A-D-DD]:52.6° a_planarity:3.7°, maximum<br>distance exceeded, bad a_angle(sp2), bad d_angle(sp3)                                         |                 |
| 2ALDA | <a href="#">CYS239(O)</a>  | 4.52 | <a href="#">THR240(CG2)</a> | 2ALDA |                                                                                                                                                          |                 |
| 2ALDA | <a href="#">CYS239(CB)</a> | 3.35 | <a href="#">THR240(N)</a>   | 2ALDA |                                                                                                                                                          | C [ ] ... N [ ] |
| 2ALDA | <a href="#">CYS239(CB)</a> | 4.57 | <a href="#">THR240(CA)</a>  | 2ALDA |                                                                                                                                                          |                 |
| 2ALDA | <a href="#">CYS239(CB)</a> | 4.89 | <a href="#">THR240(C)</a>   | 2ALDA |                                                                                                                                                          |                 |
| 2ALDA | <a href="#">CYS239(SG)</a> | 3.46 | <a href="#">THR240(N)</a>   | 2ALDA | [D-A-AA]:71.3° [A-D-DD]:126.8° d_planarity:83.6°,<br>bad d_planarity                                                                                     | S [ ] ... N [ ] |

|       |                            |      |                             |       |                                                                                                                                        |               |
|-------|----------------------------|------|-----------------------------|-------|----------------------------------------------------------------------------------------------------------------------------------------|---------------|
| 2ALDA | <a href="#">CYS239(SG)</a> | 4.48 | <a href="#">THR240(CA)</a>  | 2ALDA |                                                                                                                                        | S[ ] ... C[ ] |
| 2ALDA | <a href="#">CYS239(SG)</a> | 4.37 | <a href="#">THR240(C)</a>   | 2ALDA |                                                                                                                                        | S[ ] ... C[ ] |
| 2ALDA | <a href="#">CYS239(CA)</a> | 4.62 | <a href="#">GLN241(N)</a>   | 2ALDA |                                                                                                                                        |               |
| 2ALDA | <a href="#">CYS239(C)</a>  | 3.58 | <a href="#">GLN241(N)</a>   | 2ALDA |                                                                                                                                        | C[ ] ... N[ ] |
| 2ALDA | <a href="#">CYS239(C)</a>  | 4.81 | <a href="#">GLN241(CA)</a>  | 2ALDA |                                                                                                                                        |               |
| 2ALDA | <a href="#">CYS239(C)</a>  | 4.98 | <a href="#">GLN241(C)</a>   | 2ALDA |                                                                                                                                        |               |
| 2ALDA | <a href="#">CYS239(C)</a>  | 4.28 | <a href="#">GLN241(O)</a>   | 2ALDA |                                                                                                                                        | C[ ] ... O[ ] |
| 2ALDA | <a href="#">CYS239(O)</a>  | 3.84 | <a href="#">GLN241(N)</a>   | 2ALDA | [D-A-AA]:68.7° [A-D-DD]:128.9° d_planarity:73.9°<br>a_planarity:49.0°, maximum distance exceeded,<br>bad a_angle(sp2), bad d_planarity | O[ ] ... N[ ] |
| 2ALDA | <a href="#">CYS239(O)</a>  | 4.88 | <a href="#">GLN241(CA)</a>  | 2ALDA |                                                                                                                                        |               |
| 2ALDA | <a href="#">CYS239(O)</a>  | 4.69 | <a href="#">GLN241(C)</a>   | 2ALDA |                                                                                                                                        |               |
| 2ALDA | <a href="#">CYS239(O)</a>  | 3.85 | <a href="#">GLN241(O)</a>   | 2ALDA |                                                                                                                                        | O[ ] ... O[ ] |
| 2ALDA | <a href="#">CYS239(CB)</a> | 4.57 | <a href="#">GLN241(N)</a>   | 2ALDA |                                                                                                                                        |               |
| 2ALDA | <a href="#">CYS239(CB)</a> | 4.50 | <a href="#">GLN241(O)</a>   | 2ALDA |                                                                                                                                        |               |
| 2ALDA | <a href="#">CYS239(SG)</a> | 3.61 | <a href="#">GLN241(N)</a>   | 2ALDA | <b>H-bond</b> [D-A-AA]:110.4° [A-D-DD]:105.1° d_planarity:-41.4°                                                                       | S[ ] ... N[ ] |
| 2ALDA | <a href="#">CYS239(SG)</a> | 4.22 | <a href="#">GLN241(CA)</a>  | 2ALDA |                                                                                                                                        | S[ ] ... C[ ] |
| 2ALDA | <a href="#">CYS239(SG)</a> | 4.53 | <a href="#">GLN241(C)</a>   | 2ALDA |                                                                                                                                        |               |
| 2ALDA | <a href="#">CYS239(SG)</a> | 3.92 | <a href="#">GLN241(O)</a>   | 2ALDA |                                                                                                                                        | S[ ] ... O[ ] |
| 2ALDA | <a href="#">CYS239(SG)</a> | 3.92 | <a href="#">GLN241(CB)</a>  | 2ALDA |                                                                                                                                        | S[ ] ... C[ ] |
| 2ALDA | <a href="#">CYS239(SG)</a> | 4.32 | <a href="#">GLN241(CG)</a>  | 2ALDA |                                                                                                                                        | S[ ] ... C[ ] |
| 2ALDA | <a href="#">CYS239(O)</a>  | 4.52 | <a href="#">LYS242(NZ)</a>  | 2ALDA | [D-A-AA]:156.3° [A-D-DD]:117.9° a_planarity:15.7°,<br>maximum distance exceeded                                                        |               |
| 2ALDA | <a href="#">CYS239(SG)</a> | 4.43 | <a href="#">PHE243(CE2)</a> | 2ALDA |                                                                                                                                        | S[ ] ... C[ ] |

| chain1 | res1/atm1                  | distance | res2/atm2                   | chain2 | H-bonding                                                              | Charge interaction |
|--------|----------------------------|----------|-----------------------------|--------|------------------------------------------------------------------------|--------------------|
| 2ALDA  | <a href="#">CYS338(SG)</a> | 3.97     | <a href="#">GLY26(N)</a>    | 2ALDA  | [D-A-AA]:145.6° [A-D-DD]:71.9° d_planarity:-25.2°,<br>bad d_angle(sp2) | S[ ] ... N[ ]      |
| 2ALDA  | <a href="#">CYS338(SG)</a> | 3.78     | <a href="#">GLY26(CA)</a>   | 2ALDA  |                                                                        | S[ ] ... C[ ]      |
| 2ALDA  | <a href="#">CYS338(SG)</a> | 3.63     | <a href="#">GLY26(C)</a>    | 2ALDA  |                                                                        | S[ ] ... C[ ]      |
| 2ALDA  | <a href="#">CYS338(SG)</a> | 3.73     | <a href="#">GLY26(O)</a>    | 2ALDA  |                                                                        | S[ ] ... O[ ]      |
| 2ALDA  | <a href="#">CYS338(CB)</a> | 4.93     | <a href="#">LYS27(O)</a>    | 2ALDA  |                                                                        |                    |
| 2ALDA  | <a href="#">CYS338(SG)</a> | 3.93     | <a href="#">LYS27(N)</a>    | 2ALDA  | [D-A-AA]:154.0° [A-D-DD]:110.0° d_planarity:74.6°,<br>bad d_planarity  | S[ ] ... N[ ]      |
| 2ALDA  | <a href="#">CYS338(SG)</a> | 4.63     | <a href="#">LYS27(CA)</a>   | 2ALDA  |                                                                        |                    |
| 2ALDA  | <a href="#">CYS338(SG)</a> | 4.34     | <a href="#">LYS27(C)</a>    | 2ALDA  |                                                                        | S[ ] ... C[ ]      |
| 2ALDA  | <a href="#">CYS338(SG)</a> | 3.98     | <a href="#">LYS27(O)</a>    | 2ALDA  | Weakly positive                                                        | S[ ] ... O[ ]      |
| 2ALDA  | <a href="#">CYS338(N)</a>  | 4.09     | <a href="#">LEU283(CG)</a>  | 2ALDA  |                                                                        | N[ ] ... C[ ]      |
| 2ALDA  | <a href="#">CYS338(N)</a>  | 4.02     | <a href="#">LEU283(CD2)</a> | 2ALDA  |                                                                        | N[ ] ... C[ ]      |
| 2ALDA  | <a href="#">CYS338(CA)</a> | 4.10     | <a href="#">LEU283(CG)</a>  | 2ALDA  |                                                                        | C[ ] ... C[ ]      |
| 2ALDA  | <a href="#">CYS338(CA)</a> | 4.69     | <a href="#">LEU283(CD1)</a> | 2ALDA  |                                                                        |                    |
| 2ALDA  | <a href="#">CYS338(CA)</a> | 4.16     | <a href="#">LEU283(CD2)</a> | 2ALDA  |                                                                        | C[ ] ... C[ ]      |
| 2ALDA  | <a href="#">CYS338(CB)</a> | 4.47     | <a href="#">LEU283(CG)</a>  | 2ALDA  |                                                                        | C[ ] ... C[ ]      |
| 2ALDA  | <a href="#">CYS338(CB)</a> | 4.88     | <a href="#">LEU283(CD1)</a> | 2ALDA  |                                                                        |                    |
| 2ALDA  | <a href="#">CYS338(CB)</a> | 4.09     | <a href="#">LEU283(CD2)</a> | 2ALDA  |                                                                        | C[ ] ... C[ ]      |
| 2ALDA  | <a href="#">CYS338(N)</a>  | 4.97     | <a href="#">ASN287(CG)</a>  | 2ALDA  |                                                                        |                    |
| 2ALDA  | <a href="#">CYS338(N)</a>  | 4.43     | <a href="#">ASN287(ND2)</a> | 2ALDA  |                                                                        | N[ ] ... N[ ]      |

|       |                             |      |                              |       |                                                                                                                                         |                 |
|-------|-----------------------------|------|------------------------------|-------|-----------------------------------------------------------------------------------------------------------------------------------------|-----------------|
| 2ALDA | <a href="#">CYS338</a> (CA) | 4.73 | <a href="#">ASN287</a> (CB)  | 2ALDA |                                                                                                                                         |                 |
| 2ALDA | <a href="#">CYS338</a> (CA) | 4.01 | <a href="#">ASN287</a> (CG)  | 2ALDA |                                                                                                                                         | C [ ] ... C [ ] |
| 2ALDA | <a href="#">CYS338</a> (CA) | 4.32 | <a href="#">ASN287</a> (OD1) | 2ALDA |                                                                                                                                         | C [ ] ... O [ ] |
| 2ALDA | <a href="#">CYS338</a> (CA) | 3.52 | <a href="#">ASN287</a> (ND2) | 2ALDA |                                                                                                                                         | C [ ] ... N [ ] |
| 2ALDA | <a href="#">CYS338</a> (C)  | 4.27 | <a href="#">ASN287</a> (CB)  | 2ALDA |                                                                                                                                         | C [ ] ... C [ ] |
| 2ALDA | <a href="#">CYS338</a> (C)  | 3.65 | <a href="#">ASN287</a> (CG)  | 2ALDA |                                                                                                                                         | C [ ] ... C [ ] |
| 2ALDA | <a href="#">CYS338</a> (C)  | 3.68 | <a href="#">ASN287</a> (OD1) | 2ALDA |                                                                                                                                         | C [ ] ... O [ ] |
| 2ALDA | <a href="#">CYS338</a> (C)  | 3.69 | <a href="#">ASN287</a> (ND2) | 2ALDA |                                                                                                                                         | C [ ] ... N [ ] |
| 2ALDA | <a href="#">CYS338</a> (O)  | 4.52 | <a href="#">ASN287</a> (CB)  | 2ALDA |                                                                                                                                         |                 |
| 2ALDA | <a href="#">CYS338</a> (O)  | 3.65 | <a href="#">ASN287</a> (CG)  | 2ALDA |                                                                                                                                         | O [ ] ... C [ ] |
| 2ALDA | <a href="#">CYS338</a> (O)  | 3.27 | <a href="#">ASN287</a> (OD1) | 2ALDA |                                                                                                                                         | O [ ] ... O [ ] |
| 2ALDA | <a href="#">CYS338</a> (O)  | 3.87 | <a href="#">ASN287</a> (ND2) | 2ALDA | [D-A-AA]:72.6° [A-D-DD]:70.7° d_planarity:57.3°<br>a_planarity:-67.6°, maximum distance exceeded,<br>bad a_angle(sp2), bad d_angle(sp2) | O [ ] ... N [ ] |
| 2ALDA | <a href="#">CYS338</a> (CB) | 4.40 | <a href="#">ASN287</a> (ND2) | 2ALDA |                                                                                                                                         | C [ ] ... N [ ] |
| 2ALDA | <a href="#">CYS338</a> (CA) | 3.84 | <a href="#">LEU297</a> (O)   | 2ALDA |                                                                                                                                         | C [ ] ... O [ ] |
| 2ALDA | <a href="#">CYS338</a> (C)  | 4.26 | <a href="#">LEU297</a> (O)   | 2ALDA |                                                                                                                                         | C [ ] ... O [ ] |
| 2ALDA | <a href="#">CYS338</a> (O)  | 3.89 | <a href="#">LEU297</a> (O)   | 2ALDA |                                                                                                                                         | O [ ] ... O [ ] |
| 2ALDA | <a href="#">CYS338</a> (CB) | 4.57 | <a href="#">LEU297</a> (C)   | 2ALDA |                                                                                                                                         |                 |
| 2ALDA | <a href="#">CYS338</a> (CB) | 3.61 | <a href="#">LEU297</a> (O)   | 2ALDA |                                                                                                                                         | C [ ] ... O [ ] |
| 2ALDA | <a href="#">CYS338</a> (CA) | 4.94 | <a href="#">THR298</a> (CA)  | 2ALDA |                                                                                                                                         |                 |
| 2ALDA | <a href="#">CYS338</a> (CA) | 4.97 | <a href="#">THR298</a> (OG1) | 2ALDA |                                                                                                                                         |                 |
| 2ALDA | <a href="#">CYS338</a> (CB) | 4.75 | <a href="#">THR298</a> (N)   | 2ALDA |                                                                                                                                         |                 |
| 2ALDA | <a href="#">CYS338</a> (CB) | 3.93 | <a href="#">THR298</a> (CA)  | 2ALDA |                                                                                                                                         | C [ ] ... C [ ] |
| 2ALDA | <a href="#">CYS338</a> (CB) | 4.91 | <a href="#">THR298</a> (C)   | 2ALDA |                                                                                                                                         |                 |
| 2ALDA | <a href="#">CYS338</a> (CB) | 3.96 | <a href="#">THR298</a> (CB)  | 2ALDA |                                                                                                                                         | C [ ] ... C [ ] |
| 2ALDA | <a href="#">CYS338</a> (CB) | 3.50 | <a href="#">THR298</a> (OG1) | 2ALDA |                                                                                                                                         | C [ ] ... O [ ] |
| 2ALDA | <a href="#">CYS338</a> (SG) | 4.93 | <a href="#">THR298</a> (CA)  | 2ALDA |                                                                                                                                         |                 |
| 2ALDA | <a href="#">CYS338</a> (SG) | 4.40 | <a href="#">THR298</a> (CB)  | 2ALDA |                                                                                                                                         | S [ ] ... C [ ] |
| 2ALDA | <a href="#">CYS338</a> (SG) | 3.60 | <a href="#">THR298</a> (OG1) | 2ALDA | <b>H-bond</b> [D-A-AA]:72.3° [A-D-DD]:114.7°                                                                                            | S [ ] ... O [ ] |
| 2ALDA | <a href="#">CYS338</a> (CB) | 4.57 | <a href="#">PHE299</a> (CD1) | 2ALDA |                                                                                                                                         |                 |
| 2ALDA | <a href="#">CYS338</a> (CB) | 4.82 | <a href="#">PHE299</a> (CE1) | 2ALDA |                                                                                                                                         |                 |
| 2ALDA | <a href="#">CYS338</a> (SG) | 4.77 | <a href="#">PHE299</a> (CD1) | 2ALDA |                                                                                                                                         |                 |
| 2ALDA | <a href="#">CYS338</a> (SG) | 4.51 | <a href="#">PHE299</a> (CE1) | 2ALDA |                                                                                                                                         |                 |
| 2ALDA | <a href="#">CYS338</a> (N)  | 4.93 | <a href="#">ASN334</a> (CA)  | 2ALDA |                                                                                                                                         |                 |
| 2ALDA | <a href="#">CYS338</a> (N)  | 4.11 | <a href="#">ASN334</a> (C)   | 2ALDA |                                                                                                                                         | N [ ] ... C [ ] |
| 2ALDA | <a href="#">CYS338</a> (N)  | 2.95 | <a href="#">ASN334</a> (O)   | 2ALDA | <b>H-bond</b> [D-A-AA]:154.0° [A-D-DD]:118.2° d_planarity:-<br>26.4° a_planarity:-79.1°                                                 | N [ ] ... O [ ] |
| 2ALDA | <a href="#">CYS338</a> (CA) | 3.89 | <a href="#">ASN334</a> (O)   | 2ALDA |                                                                                                                                         | C [ ] ... O [ ] |
| 2ALDA | <a href="#">CYS338</a> (CB) | 4.85 | <a href="#">ASN334</a> (C)   | 2ALDA |                                                                                                                                         |                 |
| 2ALDA | <a href="#">CYS338</a> (CB) | 3.66 | <a href="#">ASN334</a> (O)   | 2ALDA |                                                                                                                                         | C [ ] ... O [ ] |
| 2ALDA | <a href="#">CYS338</a> (SG) | 4.74 | <a href="#">ASN334</a> (C)   | 2ALDA |                                                                                                                                         |                 |
| 2ALDA | <a href="#">CYS338</a> (SG) | 3.76 | <a href="#">ASN334</a> (O)   | 2ALDA |                                                                                                                                         | S [ ] ... O [ ] |
| 2ALDA | <a href="#">CYS338</a> (N)  | 4.87 | <a href="#">SER335</a> (N)   | 2ALDA |                                                                                                                                         |                 |
| 2ALDA | <a href="#">CYS338</a> (N)  | 4.81 | <a href="#">SER335</a> (CA)  | 2ALDA |                                                                                                                                         |                 |
| 2ALDA | <a href="#">CYS338</a> (N)  | 4.14 | <a href="#">SER335</a> (C)   | 2ALDA |                                                                                                                                         | N [ ] ... C [ ] |
| 2ALDA | <a href="#">CYS338</a> (N)  | 3.76 | <a href="#">SER335</a> (O)   | 2ALDA | [D-A-AA]:99.2° [A-D-DD]:104.1° d_planarity:-37.4°<br>a_planarity:85.9°, maximum distance exceeded                                       | N [ ] ... O [ ] |
| 2ALDA | <a href="#">CYS338</a> (CA) | 4.36 | <a href="#">SER335</a> (O)   | 2ALDA |                                                                                                                                         | C [ ] ... O [ ] |
| 2ALDA | <a href="#">CYS338</a> (C)  | 4.43 | <a href="#">SER335</a> (O)   | 2ALDA |                                                                                                                                         | C [ ] ... O [ ] |

|       |                             |      |                             |       |                                                                                                          |               |
|-------|-----------------------------|------|-----------------------------|-------|----------------------------------------------------------------------------------------------------------|---------------|
| 2ALDA | <a href="#">CYS338</a> (CB) | 4.97 | <a href="#">SER335</a> (C)  | 2ALDA |                                                                                                          |               |
| 2ALDA | <a href="#">CYS338</a> (CB) | 4.37 | <a href="#">SER335</a> (O)  | 2ALDA |                                                                                                          | C[ ] ... O[ ] |
| 2ALDA | <a href="#">CYS338</a> (SG) | 4.90 | <a href="#">SER335</a> (N)  | 2ALDA | [D-A-AA]:98.2° [A-D-DD]:51.4° d_planarity:19.7°,<br>maximum distance exceeded, bad d_angle(sp2)          |               |
| 2ALDA | <a href="#">CYS338</a> (SG) | 4.15 | <a href="#">SER335</a> (CA) | 2ALDA |                                                                                                          | S[ ] ... C[ ] |
| 2ALDA | <a href="#">CYS338</a> (SG) | 4.15 | <a href="#">SER335</a> (C)  | 2ALDA |                                                                                                          | S[ ] ... C[ ] |
| 2ALDA | <a href="#">CYS338</a> (SG) | 3.45 | <a href="#">SER335</a> (O)  | 2ALDA |                                                                                                          | S[ ] ... O[ ] |
| 2ALDA | <a href="#">CYS338</a> (N)  | 4.27 | <a href="#">LEU336</a> (N)  | 2ALDA |                                                                                                          | N[ ] ... N[ ] |
| 2ALDA | <a href="#">CYS338</a> (N)  | 4.33 | <a href="#">LEU336</a> (CA) | 2ALDA |                                                                                                          | N[ ] ... C[ ] |
| 2ALDA | <a href="#">CYS338</a> (N)  | 3.17 | <a href="#">LEU336</a> (C)  | 2ALDA |                                                                                                          | N[ ] ... C[ ] |
| 2ALDA | <a href="#">CYS338</a> (N)  | 3.30 | <a href="#">LEU336</a> (O)  | 2ALDA | [D-A-AA]:73.2° [A-D-DD]:123.5° d_planarity:79.1°<br>a_planarity:45.6°, bad a_angle(sp2), bad d_planarity | N[ ] ... O[ ] |
| 2ALDA | <a href="#">CYS338</a> (CA) | 4.43 | <a href="#">LEU336</a> (C)  | 2ALDA |                                                                                                          | C[ ] ... C[ ] |
| 2ALDA | <a href="#">CYS338</a> (CA) | 4.31 | <a href="#">LEU336</a> (O)  | 2ALDA |                                                                                                          | C[ ] ... O[ ] |
| 2ALDA | <a href="#">CYS338</a> (C)  | 4.59 | <a href="#">LEU336</a> (C)  | 2ALDA |                                                                                                          |               |
| 2ALDA | <a href="#">CYS338</a> (C)  | 4.10 | <a href="#">LEU336</a> (O)  | 2ALDA |                                                                                                          | C[ ] ... O[ ] |
| 2ALDA | <a href="#">CYS338</a> (N)  | 2.81 | <a href="#">ALA337</a> (N)  | 2ALDA |                                                                                                          | N[ ] ... N[ ] |
| 2ALDA | <a href="#">CYS338</a> (N)  | 2.47 | <a href="#">ALA337</a> (CA) | 2ALDA |                                                                                                          | N[ ] ... C[ ] |
| 2ALDA | <a href="#">CYS338</a> (N)  | 2.20 | <a href="#">ALA337</a> (O)  | 2ALDA | [D-A-AA]:31.2° [A-D-DD]:91.9° d_planarity:6.9°<br>a_planarity:13.9°, bad a_angle(sp2)                    | N[ ] ... O[ ] |
| 2ALDA | <a href="#">CYS338</a> (N)  | 3.35 | <a href="#">ALA337</a> (CB) | 2ALDA |                                                                                                          | N[ ] ... C[ ] |
| 2ALDA | <a href="#">CYS338</a> (CA) | 4.27 | <a href="#">ALA337</a> (N)  | 2ALDA |                                                                                                          | C[ ] ... N[ ] |
| 2ALDA | <a href="#">CYS338</a> (CA) | 3.85 | <a href="#">ALA337</a> (CA) | 2ALDA |                                                                                                          | C[ ] ... C[ ] |
| 2ALDA | <a href="#">CYS338</a> (CA) | 2.43 | <a href="#">ALA337</a> (C)  | 2ALDA |                                                                                                          | C[ ] ... C[ ] |
| 2ALDA | <a href="#">CYS338</a> (CA) | 2.70 | <a href="#">ALA337</a> (O)  | 2ALDA |                                                                                                          | C[ ] ... O[ ] |
| 2ALDA | <a href="#">CYS338</a> (CA) | 4.64 | <a href="#">ALA337</a> (CB) | 2ALDA |                                                                                                          |               |
| 2ALDA | <a href="#">CYS338</a> (C)  | 4.85 | <a href="#">ALA337</a> (N)  | 2ALDA |                                                                                                          |               |
| 2ALDA | <a href="#">CYS338</a> (C)  | 4.55 | <a href="#">ALA337</a> (CA) | 2ALDA |                                                                                                          |               |
| 2ALDA | <a href="#">CYS338</a> (C)  | 3.17 | <a href="#">ALA337</a> (C)  | 2ALDA |                                                                                                          | C[ ] ... C[ ] |
| 2ALDA | <a href="#">CYS338</a> (C)  | 3.06 | <a href="#">ALA337</a> (O)  | 2ALDA |                                                                                                          | C[ ] ... O[ ] |
| 2ALDA | <a href="#">CYS338</a> (O)  | 4.36 | <a href="#">ALA337</a> (C)  | 2ALDA |                                                                                                          | O[ ] ... C[ ] |
| 2ALDA | <a href="#">CYS338</a> (O)  | 4.17 | <a href="#">ALA337</a> (O)  | 2ALDA |                                                                                                          | O[ ] ... O[ ] |
| 2ALDA | <a href="#">CYS338</a> (CB) | 4.94 | <a href="#">ALA337</a> (CA) | 2ALDA |                                                                                                          |               |
| 2ALDA | <a href="#">CYS338</a> (CB) | 3.70 | <a href="#">ALA337</a> (C)  | 2ALDA |                                                                                                          | C[ ] ... C[ ] |
| 2ALDA | <a href="#">CYS338</a> (CB) | 4.17 | <a href="#">ALA337</a> (O)  | 2ALDA |                                                                                                          | C[ ] ... O[ ] |
| 2ALDA | <a href="#">CYS338</a> (SG) | 4.79 | <a href="#">ALA337</a> (C)  | 2ALDA |                                                                                                          |               |
| 2ALDA | <a href="#">CYS338</a> (N)  | 2.69 | <a href="#">GLN339</a> (N)  | 2ALDA |                                                                                                          | N[ ] ... N[ ] |
| 2ALDA | <a href="#">CYS338</a> (N)  | 4.13 | <a href="#">GLN339</a> (CA) | 2ALDA |                                                                                                          | N[ ] ... C[ ] |
| 2ALDA | <a href="#">CYS338</a> (N)  | 4.69 | <a href="#">GLN339</a> (C)  | 2ALDA |                                                                                                          |               |
| 2ALDA | <a href="#">CYS338</a> (N)  | 4.82 | <a href="#">GLN339</a> (CB) | 2ALDA |                                                                                                          |               |
| 2ALDA | <a href="#">CYS338</a> (CA) | 2.44 | <a href="#">GLN339</a> (N)  | 2ALDA |                                                                                                          | C[ ] ... N[ ] |
| 2ALDA | <a href="#">CYS338</a> (CA) | 3.84 | <a href="#">GLN339</a> (CA) | 2ALDA |                                                                                                          | C[ ] ... C[ ] |
| 2ALDA | <a href="#">CYS338</a> (CA) | 4.61 | <a href="#">GLN339</a> (C)  | 2ALDA |                                                                                                          |               |
| 2ALDA | <a href="#">CYS338</a> (CA) | 4.77 | <a href="#">GLN339</a> (CB) | 2ALDA |                                                                                                          |               |
| 2ALDA | <a href="#">CYS338</a> (CA) | 4.90 | <a href="#">GLN339</a> (CG) | 2ALDA |                                                                                                          |               |
| 2ALDA | <a href="#">CYS338</a> (C)  | 2.47 | <a href="#">GLN339</a> (CA) | 2ALDA |                                                                                                          | C[ ] ... C[ ] |
| 2ALDA | <a href="#">CYS338</a> (C)  | 3.41 | <a href="#">GLN339</a> (C)  | 2ALDA |                                                                                                          | C[ ] ... C[ ] |
| 2ALDA | <a href="#">CYS338</a> (C)  | 4.58 | <a href="#">GLN339</a> (O)  | 2ALDA |                                                                                                          |               |
| 2ALDA | <a href="#">CYS338</a> (C)  | 3.56 | <a href="#">GLN339</a> (CB) | 2ALDA |                                                                                                          | C[ ] ... C[ ] |
| 2ALDA | <a href="#">CYS338</a> (C)  | 3.81 | <a href="#">GLN339</a> (CG) | 2ALDA |                                                                                                          | C[ ] ... C[ ] |

|       |                            |      |                            |       |                                                                                                                                                       |                 |
|-------|----------------------------|------|----------------------------|-------|-------------------------------------------------------------------------------------------------------------------------------------------------------|-----------------|
| 2ALDA | <a href="#">CYS338(O)</a>  | 2.21 | <a href="#">GLN339(N)</a>  | 2ALDA | [D-A-AA]:31.6° [A-D-DD]:97.9° d_planarity:11.8°<br>a_planarity:21.3°, <b>bad a_angle(sp2)</b>                                                         | O [ ] ... N [ ] |
| 2ALDA | <a href="#">CYS338(O)</a>  | 2.81 | <a href="#">GLN339(CA)</a> | 2ALDA |                                                                                                                                                       | O [ ] ... C [ ] |
| 2ALDA | <a href="#">CYS338(O)</a>  | 3.89 | <a href="#">GLN339(C)</a>  | 2ALDA |                                                                                                                                                       | O [ ] ... C [ ] |
| 2ALDA | <a href="#">CYS338(O)</a>  | 4.94 | <a href="#">GLN339(O)</a>  | 2ALDA |                                                                                                                                                       |                 |
| 2ALDA | <a href="#">CYS338(O)</a>  | 3.86 | <a href="#">GLN339(CB)</a> | 2ALDA |                                                                                                                                                       | O [ ] ... C [ ] |
| 2ALDA | <a href="#">CYS338(O)</a>  | 3.84 | <a href="#">GLN339(CG)</a> | 2ALDA |                                                                                                                                                       | O [ ] ... C [ ] |
| 2ALDA | <a href="#">CYS338(CB)</a> | 3.53 | <a href="#">GLN339(N)</a>  | 2ALDA |                                                                                                                                                       | C [ ] ... N [ ] |
| 2ALDA | <a href="#">CYS338(CB)</a> | 4.83 | <a href="#">GLN339(CA)</a> | 2ALDA |                                                                                                                                                       |                 |
| 2ALDA | <a href="#">CYS338(SG)</a> | 3.90 | <a href="#">GLN339(N)</a>  | 2ALDA | [D-A-AA]:64.5° [A-D-DD]:130.0° d_planarity:68.5°<br><b>bad d_planarity</b>                                                                            | S [ ] ... N [ ] |
| 2ALDA | <a href="#">CYS338(SG)</a> | 4.97 | <a href="#">GLN339(CA)</a> | 2ALDA |                                                                                                                                                       |                 |
| 2ALDA | <a href="#">CYS338(SG)</a> | 4.44 | <a href="#">GLN339(CG)</a> | 2ALDA |                                                                                                                                                       | S [ ] ... C [ ] |
| 2ALDA | <a href="#">CYS338(N)</a>  | 4.20 | <a href="#">GLY340(N)</a>  | 2ALDA |                                                                                                                                                       | N [ ] ... N [ ] |
| 2ALDA | <a href="#">CYS338(CA)</a> | 4.36 | <a href="#">GLY340(N)</a>  | 2ALDA |                                                                                                                                                       | C [ ] ... N [ ] |
| 2ALDA | <a href="#">CYS338(C)</a>  | 3.52 | <a href="#">GLY340(N)</a>  | 2ALDA |                                                                                                                                                       | C [ ] ... N [ ] |
| 2ALDA | <a href="#">CYS338(C)</a>  | 4.87 | <a href="#">GLY340(CA)</a> | 2ALDA |                                                                                                                                                       |                 |
| 2ALDA | <a href="#">CYS338(O)</a>  | 4.30 | <a href="#">GLY340(N)</a>  | 2ALDA | [D-A-AA]:44.3° [A-D-DD]:152.6° d_planarity:-85.1°<br>a_planarity:26.2°, <b>maximum distance exceeded,</b><br><b>bad a_angle(sp2), bad d_planarity</b> | O [ ] ... N [ ] |

| chain1 | res1/atm1                 | distance | res2/atm2                  | chain2 | H-bonding                                                                                                                                             | Charge interaction |
|--------|---------------------------|----------|----------------------------|--------|-------------------------------------------------------------------------------------------------------------------------------------------------------|--------------------|
| 3GR4A  | <a href="#">CYS49(N)</a>  | 4.06     | <a href="#">ILE47(C)</a>   | 3GR4A  |                                                                                                                                                       | N [ ] ... C [ ]    |
| 3GR4A  | <a href="#">CYS49(N)</a>  | 4.04     | <a href="#">ILE47(O)</a>   | 3GR4A  | [D-A-AA]:81.9° [A-D-DD]:140.3° d_planarity:-88.6°<br>a_planarity:30.6°, <b>maximum distance exceeded,</b><br><b>bad a_angle(sp2), bad d_planarity</b> | N [ ] ... O [ ]    |
| 3GR4A  | <a href="#">CYS49(N)</a>  | 4.92     | <a href="#">ILE47(CG2)</a> | 3GR4A  |                                                                                                                                                       |                    |
| 3GR4A  | <a href="#">CYS49(SG)</a> | 4.70     | <a href="#">ILE47(C)</a>   | 3GR4A  |                                                                                                                                                       |                    |
| 3GR4A  | <a href="#">CYS49(SG)</a> | 4.51     | <a href="#">ILE47(O)</a>   | 3GR4A  |                                                                                                                                                       |                    |
| 3GR4A  | <a href="#">CYS49(SG)</a> | 4.97     | <a href="#">ILE47(CB)</a>  | 3GR4A  |                                                                                                                                                       |                    |
| 3GR4A  | <a href="#">CYS49(SG)</a> | 3.72     | <a href="#">ILE47(CG2)</a> | 3GR4A  |                                                                                                                                                       | S [ ] ... C [ ]    |
| 3GR4A  | <a href="#">CYS49(N)</a>  | 3.44     | <a href="#">ILE48(N)</a>   | 3GR4A  |                                                                                                                                                       | N [ ] ... N [ ]    |
| 3GR4A  | <a href="#">CYS49(N)</a>  | 2.44     | <a href="#">ILE48(CA)</a>  | 3GR4A  |                                                                                                                                                       | N [ ] ... C [ ]    |
| 3GR4A  | <a href="#">CYS49(N)</a>  | 2.26     | <a href="#">ILE48(O)</a>   | 3GR4A  | [D-A-AA]:30.0° [A-D-DD]:94.0° d_planarity:1.0°<br>a_planarity:1.4°, <b>bad a_angle(sp2)</b>                                                           | N [ ] ... O [ ]    |
| 3GR4A  | <a href="#">CYS49(N)</a>  | 3.47     | <a href="#">ILE48(CB)</a>  | 3GR4A  |                                                                                                                                                       | N [ ] ... C [ ]    |
| 3GR4A  | <a href="#">CYS49(N)</a>  | 4.77     | <a href="#">ILE48(CG1)</a> | 3GR4A  |                                                                                                                                                       |                    |
| 3GR4A  | <a href="#">CYS49(N)</a>  | 3.50     | <a href="#">ILE48(CG2)</a> | 3GR4A  |                                                                                                                                                       | N [ ] ... C [ ]    |
| 3GR4A  | <a href="#">CYS49(CA)</a> | 4.66     | <a href="#">ILE48(N)</a>   | 3GR4A  |                                                                                                                                                       |                    |
| 3GR4A  | <a href="#">CYS49(CA)</a> | 3.80     | <a href="#">ILE48(CA)</a>  | 3GR4A  |                                                                                                                                                       | C [ ] ... C [ ]    |
| 3GR4A  | <a href="#">CYS49(CA)</a> | 2.43     | <a href="#">ILE48(C)</a>   | 3GR4A  |                                                                                                                                                       | C [ ] ... C [ ]    |
| 3GR4A  | <a href="#">CYS49(CA)</a> | 2.77     | <a href="#">ILE48(O)</a>   | 3GR4A  |                                                                                                                                                       | C [ ] ... O [ ]    |
| 3GR4A  | <a href="#">CYS49(CA)</a> | 4.72     | <a href="#">ILE48(CB)</a>  | 3GR4A  |                                                                                                                                                       |                    |
| 3GR4A  | <a href="#">CYS49(CA)</a> | 4.55     | <a href="#">ILE48(CG2)</a> | 3GR4A  |                                                                                                                                                       |                    |
| 3GR4A  | <a href="#">CYS49(C)</a>  | 4.70     | <a href="#">ILE48(CA)</a>  | 3GR4A  |                                                                                                                                                       |                    |
| 3GR4A  | <a href="#">CYS49(C)</a>  | 3.46     | <a href="#">ILE48(C)</a>   | 3GR4A  |                                                                                                                                                       | C [ ] ... C [ ]    |
| 3GR4A  | <a href="#">CYS49(C)</a>  | 3.80     | <a href="#">ILE48(O)</a>   | 3GR4A  |                                                                                                                                                       | C [ ] ... O [ ]    |

|       |                           |      |                            |       |                                                                                                                |               |
|-------|---------------------------|------|----------------------------|-------|----------------------------------------------------------------------------------------------------------------|---------------|
| 3GR4A | <a href="#">CYS49(C)</a>  | 4.67 | <a href="#">ILE48(CG2)</a> | 3GR4A |                                                                                                                |               |
| 3GR4A | <a href="#">CYS49(O)</a>  | 4.98 | <a href="#">ILE48(CA)</a>  | 3GR4A |                                                                                                                |               |
| 3GR4A | <a href="#">CYS49(O)</a>  | 4.02 | <a href="#">ILE48(C)</a>   | 3GR4A |                                                                                                                | O[ ] ... C[ ] |
| 3GR4A | <a href="#">CYS49(O)</a>  | 4.63 | <a href="#">ILE48(O)</a>   | 3GR4A |                                                                                                                |               |
| 3GR4A | <a href="#">CYS49(O)</a>  | 4.73 | <a href="#">ILE48(CG2)</a> | 3GR4A |                                                                                                                |               |
| 3GR4A | <a href="#">CYS49(CB)</a> | 4.71 | <a href="#">ILE48(CA)</a>  | 3GR4A |                                                                                                                |               |
| 3GR4A | <a href="#">CYS49(CB)</a> | 3.51 | <a href="#">ILE48(C)</a>   | 3GR4A |                                                                                                                | C[ ] ... C[ ] |
| 3GR4A | <a href="#">CYS49(CB)</a> | 3.92 | <a href="#">ILE48(O)</a>   | 3GR4A |                                                                                                                | C[ ] ... O[ ] |
| 3GR4A | <a href="#">CYS49(SG)</a> | 4.81 | <a href="#">ILE48(N)</a>   | 3GR4A | [D-A-AA]:96.1° [A-D-DD]:77.9° d_planarity:65.2°, maximum distance exceeded, bad d_angle(sp2), bad d_planarity  |               |
| 3GR4A | <a href="#">CYS49(SG)</a> | 4.73 | <a href="#">ILE48(CA)</a>  | 3GR4A |                                                                                                                |               |
| 3GR4A | <a href="#">CYS49(SG)</a> | 3.76 | <a href="#">ILE48(C)</a>   | 3GR4A |                                                                                                                | S[ ] ... C[ ] |
| 3GR4A | <a href="#">CYS49(SG)</a> | 4.08 | <a href="#">ILE48(O)</a>   | 3GR4A |                                                                                                                | S[ ] ... O[ ] |
| 3GR4A | <a href="#">CYS49(N)</a>  | 3.47 | <a href="#">THR50(N)</a>   | 3GR4A |                                                                                                                | N[ ] ... N[ ] |
| 3GR4A | <a href="#">CYS49(N)</a>  | 4.73 | <a href="#">THR50(CA)</a>  | 3GR4A |                                                                                                                |               |
| 3GR4A | <a href="#">CYS49(CA)</a> | 2.40 | <a href="#">THR50(N)</a>   | 3GR4A |                                                                                                                | C[ ] ... N[ ] |
| 3GR4A | <a href="#">CYS49(CA)</a> | 3.76 | <a href="#">THR50(CA)</a>  | 3GR4A |                                                                                                                | C[ ] ... C[ ] |
| 3GR4A | <a href="#">CYS49(CA)</a> | 4.37 | <a href="#">THR50(C)</a>   | 3GR4A |                                                                                                                | C[ ] ... C[ ] |
| 3GR4A | <a href="#">CYS49(CA)</a> | 4.55 | <a href="#">THR50(O)</a>   | 3GR4A |                                                                                                                |               |
| 3GR4A | <a href="#">CYS49(CA)</a> | 4.83 | <a href="#">THR50(CB)</a>  | 3GR4A |                                                                                                                |               |
| 3GR4A | <a href="#">CYS49(CA)</a> | 4.88 | <a href="#">THR50(OG1)</a> | 3GR4A |                                                                                                                |               |
| 3GR4A | <a href="#">CYS49(C)</a>  | 2.41 | <a href="#">THR50(CA)</a>  | 3GR4A |                                                                                                                | C[ ] ... C[ ] |
| 3GR4A | <a href="#">CYS49(C)</a>  | 3.08 | <a href="#">THR50(C)</a>   | 3GR4A |                                                                                                                | C[ ] ... C[ ] |
| 3GR4A | <a href="#">CYS49(C)</a>  | 3.56 | <a href="#">THR50(O)</a>   | 3GR4A |                                                                                                                | C[ ] ... O[ ] |
| 3GR4A | <a href="#">CYS49(C)</a>  | 3.68 | <a href="#">THR50(CB)</a>  | 3GR4A |                                                                                                                | C[ ] ... C[ ] |
| 3GR4A | <a href="#">CYS49(C)</a>  | 3.93 | <a href="#">THR50(OG1)</a> | 3GR4A |                                                                                                                | C[ ] ... O[ ] |
| 3GR4A | <a href="#">CYS49(C)</a>  | 4.89 | <a href="#">THR50(CG2)</a> | 3GR4A |                                                                                                                |               |
| 3GR4A | <a href="#">CYS49(O)</a>  | 2.23 | <a href="#">THR50(N)</a>   | 3GR4A | [D-A-AA]:29.5° [A-D-DD]:94.3° d_planarity:1.7° a_planarity:0.3°, bad a_angle(sp2)                              | O[ ] ... N[ ] |
| 3GR4A | <a href="#">CYS49(O)</a>  | 2.74 | <a href="#">THR50(CA)</a>  | 3GR4A |                                                                                                                | O[ ] ... C[ ] |
| 3GR4A | <a href="#">CYS49(O)</a>  | 3.21 | <a href="#">THR50(C)</a>   | 3GR4A |                                                                                                                | O[ ] ... C[ ] |
| 3GR4A | <a href="#">CYS49(O)</a>  | 3.95 | <a href="#">THR50(O)</a>   | 3GR4A |                                                                                                                | O[ ] ... O[ ] |
| 3GR4A | <a href="#">CYS49(O)</a>  | 4.19 | <a href="#">THR50(CB)</a>  | 3GR4A |                                                                                                                | O[ ] ... C[ ] |
| 3GR4A | <a href="#">CYS49(O)</a>  | 4.52 | <a href="#">THR50(OG1)</a> | 3GR4A | [D-A-AA]:53.5° [A-D-DD]:67.4° a_planarity:28.9°, maximum distance exceeded, bad a_angle(sp2)                   |               |
| 3GR4A | <a href="#">CYS49(CB)</a> | 3.34 | <a href="#">THR50(N)</a>   | 3GR4A |                                                                                                                | C[ ] ... N[ ] |
| 3GR4A | <a href="#">CYS49(CB)</a> | 4.56 | <a href="#">THR50(CA)</a>  | 3GR4A |                                                                                                                |               |
| 3GR4A | <a href="#">CYS49(CB)</a> | 4.68 | <a href="#">THR50(C)</a>   | 3GR4A |                                                                                                                |               |
| 3GR4A | <a href="#">CYS49(CB)</a> | 4.61 | <a href="#">THR50(O)</a>   | 3GR4A |                                                                                                                |               |
| 3GR4A | <a href="#">CYS49(SG)</a> | 4.96 | <a href="#">THR50(N)</a>   | 3GR4A | [D-A-AA]:22.1° [A-D-DD]:152.5° d_planarity:51.0°, maximum distance exceeded, bad a_angle(sp3)                  |               |
| 3GR4A | <a href="#">CYS49(CA)</a> | 4.95 | <a href="#">ILE51(CD1)</a> | 3GR4A |                                                                                                                |               |
| 3GR4A | <a href="#">CYS49(C)</a>  | 3.83 | <a href="#">ILE51(N)</a>   | 3GR4A |                                                                                                                | C[ ] ... N[ ] |
| 3GR4A | <a href="#">CYS49(C)</a>  | 4.95 | <a href="#">ILE51(CA)</a>  | 3GR4A |                                                                                                                |               |
| 3GR4A | <a href="#">CYS49(C)</a>  | 4.59 | <a href="#">ILE51(CG1)</a> | 3GR4A |                                                                                                                |               |
| 3GR4A | <a href="#">CYS49(C)</a>  | 4.26 | <a href="#">ILE51(CD1)</a> | 3GR4A |                                                                                                                | C[ ] ... C[ ] |
| 3GR4A | <a href="#">CYS49(O)</a>  | 3.54 | <a href="#">ILE51(N)</a>   | 3GR4A | [D-A-AA]:94.8° [A-D-DD]:128.1° d_planarity:81.3° a_planarity:30.6°, maximum distance exceeded, bad d_planarity | O[ ] ... N[ ] |
| 3GR4A | <a href="#">CYS49(O)</a>  | 4.60 | <a href="#">ILE51(CA)</a>  | 3GR4A |                                                                                                                |               |
| 3GR4A | <a href="#">CYS49(O)</a>  | 4.77 | <a href="#">ILE51(CB)</a>  | 3GR4A |                                                                                                                |               |

|       |                           |      |                            |       |                                                                                                                       |               |
|-------|---------------------------|------|----------------------------|-------|-----------------------------------------------------------------------------------------------------------------------|---------------|
| 3GR4A | <a href="#">CYS49(O)</a>  | 3.79 | <a href="#">ILE51(CG1)</a> | 3GR4A |                                                                                                                       | O[ ] ... C[ ] |
| 3GR4A | <a href="#">CYS49(O)</a>  | 3.74 | <a href="#">ILE51(CD1)</a> | 3GR4A |                                                                                                                       | O[ ] ... C[ ] |
| 3GR4A | <a href="#">CYS49(CB)</a> | 4.24 | <a href="#">ILE51(CD1)</a> | 3GR4A |                                                                                                                       | C[ ] ... C[ ] |
| 3GR4A | <a href="#">CYS49(CB)</a> | 3.60 | <a href="#">MET64(CE)</a>  | 3GR4A |                                                                                                                       | C[ ] ... C[ ] |
| 3GR4A | <a href="#">CYS49(SG)</a> | 3.79 | <a href="#">MET64(CE)</a>  | 3GR4A |                                                                                                                       | S[ ] ... C[ ] |
| 3GR4A | <a href="#">CYS49(N)</a>  | 4.61 | <a href="#">MET69(CG)</a>  | 3GR4A |                                                                                                                       |               |
| 3GR4A | <a href="#">CYS49(CA)</a> | 4.90 | <a href="#">MET69(CG)</a>  | 3GR4A |                                                                                                                       |               |
| 3GR4A | <a href="#">CYS49(CA)</a> | 4.92 | <a href="#">MET69(SD)</a>  | 3GR4A |                                                                                                                       |               |
| 3GR4A | <a href="#">CYS49(O)</a>  | 4.72 | <a href="#">MET69(SD)</a>  | 3GR4A |                                                                                                                       |               |
| 3GR4A | <a href="#">CYS49(CB)</a> | 4.64 | <a href="#">MET69(CB)</a>  | 3GR4A |                                                                                                                       |               |
| 3GR4A | <a href="#">CYS49(CB)</a> | 3.93 | <a href="#">MET69(CG)</a>  | 3GR4A |                                                                                                                       | C[ ] ... C[ ] |
| 3GR4A | <a href="#">CYS49(CB)</a> | 3.84 | <a href="#">MET69(SD)</a>  | 3GR4A |                                                                                                                       | C[ ] ... S[ ] |
| 3GR4A | <a href="#">CYS49(SG)</a> | 4.96 | <a href="#">MET69(N)</a>   | 3GR4A | [D-A-AA]:135.0° [A-D-DD]:51.0° d_planarity:-68.5°,<br>maximum distance exceeded, bad d_angle(sp2), bad d_planarity    |               |
| 3GR4A | <a href="#">CYS49(SG)</a> | 4.19 | <a href="#">MET69(CA)</a>  | 3GR4A |                                                                                                                       | S[ ] ... C[ ] |
| 3GR4A | <a href="#">CYS49(SG)</a> | 3.79 | <a href="#">MET69(CB)</a>  | 3GR4A |                                                                                                                       | S[ ] ... C[ ] |
| 3GR4A | <a href="#">CYS49(SG)</a> | 3.62 | <a href="#">MET69(CG)</a>  | 3GR4A |                                                                                                                       | S[ ] ... C[ ] |
| 3GR4A | <a href="#">CYS49(SG)</a> | 4.21 | <a href="#">MET69(SD)</a>  | 3GR4A |                                                                                                                       | S[ ] ... S[ ] |
| 3GR4A | <a href="#">CYS49(N)</a>  | 4.07 | <a href="#">VAL71(C)</a>   | 3GR4A |                                                                                                                       | N[ ] ... C[ ] |
| 3GR4A | <a href="#">CYS49(N)</a>  | 2.85 | <a href="#">VAL71(O)</a>   | 3GR4A | <b>H-bond</b> [D-A-AA]:170.4° [A-D-DD]:122.7° d_planarity:-5.3°<br>a_planarity:85.4°                                  | N[ ] ... O[ ] |
| 3GR4A | <a href="#">CYS49(CA)</a> | 3.82 | <a href="#">VAL71(O)</a>   | 3GR4A |                                                                                                                       | C[ ] ... O[ ] |
| 3GR4A | <a href="#">CYS49(C)</a>  | 4.09 | <a href="#">VAL71(O)</a>   | 3GR4A |                                                                                                                       | C[ ] ... O[ ] |
| 3GR4A | <a href="#">CYS49(O)</a>  | 4.34 | <a href="#">VAL71(C)</a>   | 3GR4A |                                                                                                                       | O[ ] ... C[ ] |
| 3GR4A | <a href="#">CYS49(O)</a>  | 3.51 | <a href="#">VAL71(O)</a>   | 3GR4A |                                                                                                                       | O[ ] ... O[ ] |
| 3GR4A | <a href="#">CYS49(CB)</a> | 4.11 | <a href="#">VAL71(O)</a>   | 3GR4A |                                                                                                                       | C[ ] ... O[ ] |
| 3GR4A | <a href="#">CYS49(SG)</a> | 4.76 | <a href="#">VAL71(O)</a>   | 3GR4A |                                                                                                                       |               |
| 3GR4A | <a href="#">CYS49(N)</a>  | 4.91 | <a href="#">ALA72(N)</a>   | 3GR4A |                                                                                                                       |               |
| 3GR4A | <a href="#">CYS49(N)</a>  | 4.83 | <a href="#">ALA72(CA)</a>  | 3GR4A |                                                                                                                       |               |
| 3GR4A | <a href="#">CYS49(C)</a>  | 4.61 | <a href="#">ALA72(CA)</a>  | 3GR4A |                                                                                                                       |               |
| 3GR4A | <a href="#">CYS49(C)</a>  | 4.75 | <a href="#">ALA72(C)</a>   | 3GR4A |                                                                                                                       |               |
| 3GR4A | <a href="#">CYS49(O)</a>  | 4.38 | <a href="#">ALA72(N)</a>   | 3GR4A | [D-A-AA]:140.6° [A-D-DD]:43.2° d_planarity:2.3°<br>a_planarity:-23.5°, maximum distance exceeded,<br>bad d_angle(sp2) | O[ ] ... N[ ] |
| 3GR4A | <a href="#">CYS49(O)</a>  | 3.46 | <a href="#">ALA72(CA)</a>  | 3GR4A |                                                                                                                       | O[ ] ... C[ ] |
| 3GR4A | <a href="#">CYS49(O)</a>  | 3.62 | <a href="#">ALA72(C)</a>   | 3GR4A |                                                                                                                       | O[ ] ... C[ ] |
| 3GR4A | <a href="#">CYS49(O)</a>  | 4.84 | <a href="#">ALA72(O)</a>   | 3GR4A |                                                                                                                       |               |
| 3GR4A | <a href="#">CYS49(O)</a>  | 4.46 | <a href="#">ALA72(CB)</a>  | 3GR4A |                                                                                                                       | O[ ] ... C[ ] |
| 3GR4A | <a href="#">CYS49(N)</a>  | 4.70 | <a href="#">ARG73(N)</a>   | 3GR4A |                                                                                                                       |               |
| 3GR4A | <a href="#">CYS49(CA)</a> | 4.89 | <a href="#">ARG73(N)</a>   | 3GR4A |                                                                                                                       |               |
| 3GR4A | <a href="#">CYS49(C)</a>  | 3.86 | <a href="#">ARG73(N)</a>   | 3GR4A |                                                                                                                       | C[ ] ... N[ ] |
| 3GR4A | <a href="#">CYS49(C)</a>  | 4.58 | <a href="#">ARG73(CA)</a>  | 3GR4A |                                                                                                                       |               |
| 3GR4A | <a href="#">CYS49(C)</a>  | 4.52 | <a href="#">ARG73(O)</a>   | 3GR4A |                                                                                                                       |               |
| 3GR4A | <a href="#">CYS49(C)</a>  | 4.20 | <a href="#">ARG73(CB)</a>  | 3GR4A |                                                                                                                       | C[ ] ... C[ ] |
| 3GR4A | <a href="#">CYS49(O)</a>  | 2.84 | <a href="#">ARG73(N)</a>   | 3GR4A | <b>H-bond</b> [D-A-AA]:142.0° [A-D-DD]:119.9° d_planarity:-1.5°<br>a_planarity:70.1°                                  | O[ ] ... N[ ] |
| 3GR4A | <a href="#">CYS49(O)</a>  | 3.77 | <a href="#">ARG73(CA)</a>  | 3GR4A |                                                                                                                       | O[ ] ... C[ ] |
| 3GR4A | <a href="#">CYS49(O)</a>  | 4.27 | <a href="#">ARG73(C)</a>   | 3GR4A |                                                                                                                       | O[ ] ... C[ ] |
| 3GR4A | <a href="#">CYS49(O)</a>  | 3.83 | <a href="#">ARG73(O)</a>   | 3GR4A |                                                                                                                       | O[ ] ... O[ ] |
| 3GR4A | <a href="#">CYS49(O)</a>  | 3.77 | <a href="#">ARG73(CB)</a>  | 3GR4A |                                                                                                                       | O[ ] ... C[ ] |



|       |                           |      |                             |       |                                                                                                                        |                 |
|-------|---------------------------|------|-----------------------------|-------|------------------------------------------------------------------------------------------------------------------------|-----------------|
| 3GR4A | <a href="#">CYS49(N)</a>  | 4.93 | <a href="#">LEU361(N)</a>   | 3GR4A |                                                                                                                        |                 |
| 3GR4A | <a href="#">CYS49(N)</a>  | 4.60 | <a href="#">LEU361(O)</a>   | 3GR4A | [D-A-AA]:132.2° [A-D-DD]:52.2° d_planarity:31.9°<br>a_planarity:-18.4°, maximum distance exceeded,<br>bad d_angle(sp2) |                 |
| 3GR4A | <a href="#">CYS49(CA)</a> | 4.75 | <a href="#">LEU361(N)</a>   | 3GR4A |                                                                                                                        |                 |
| 3GR4A | <a href="#">CYS49(CA)</a> | 5.00 | <a href="#">LEU361(CA)</a>  | 3GR4A |                                                                                                                        |                 |
| 3GR4A | <a href="#">CYS49(CA)</a> | 4.80 | <a href="#">LEU361(C)</a>   | 3GR4A |                                                                                                                        |                 |
| 3GR4A | <a href="#">CYS49(CA)</a> | 3.89 | <a href="#">LEU361(O)</a>   | 3GR4A |                                                                                                                        | C [ ] ... O [ ] |
| 3GR4A | <a href="#">CYS49(CA)</a> | 4.57 | <a href="#">LEU361(CB)</a>  | 3GR4A |                                                                                                                        |                 |
| 3GR4A | <a href="#">CYS49(C)</a>  | 4.96 | <a href="#">LEU361(C)</a>   | 3GR4A |                                                                                                                        |                 |
| 3GR4A | <a href="#">CYS49(C)</a>  | 3.85 | <a href="#">LEU361(O)</a>   | 3GR4A |                                                                                                                        | C [ ] ... O [ ] |
| 3GR4A | <a href="#">CYS49(O)</a>  | 4.96 | <a href="#">LEU361(O)</a>   | 3GR4A |                                                                                                                        |                 |
| 3GR4A | <a href="#">CYS49(SG)</a> | 5.00 | <a href="#">LEU361(CB)</a>  | 3GR4A |                                                                                                                        |                 |
| 3GR4A | <a href="#">CYS49(SG)</a> | 4.44 | <a href="#">LEU361(CD1)</a> | 3GR4A |                                                                                                                        | S [ ] ... C [ ] |
| 3GR4A | <a href="#">CYS49(CA)</a> | 4.75 | <a href="#">THR365(CB)</a>  | 3GR4A |                                                                                                                        |                 |
| 3GR4A | <a href="#">CYS49(CA)</a> | 3.87 | <a href="#">THR365(OG1)</a> | 3GR4A |                                                                                                                        | C [ ] ... O [ ] |
| 3GR4A | <a href="#">CYS49(CA)</a> | 4.91 | <a href="#">THR365(CG2)</a> | 3GR4A |                                                                                                                        |                 |
| 3GR4A | <a href="#">CYS49(C)</a>  | 4.86 | <a href="#">THR365(CB)</a>  | 3GR4A |                                                                                                                        |                 |
| 3GR4A | <a href="#">CYS49(C)</a>  | 3.79 | <a href="#">THR365(OG1)</a> | 3GR4A |                                                                                                                        | C [ ] ... O [ ] |
| 3GR4A | <a href="#">CYS49(O)</a>  | 4.77 | <a href="#">THR365(OG1)</a> | 3GR4A | [D-A-AA]:32.2° [A-D-DD]:125.2° a_planarity:67.5°, maximum<br>distance exceeded, bad a_angle(sp2)                       |                 |
| 3GR4A | <a href="#">CYS49(CB)</a> | 4.26 | <a href="#">THR365(CB)</a>  | 3GR4A |                                                                                                                        | C [ ] ... C [ ] |
| 3GR4A | <a href="#">CYS49(CB)</a> | 3.83 | <a href="#">THR365(OG1)</a> | 3GR4A |                                                                                                                        | C [ ] ... O [ ] |
| 3GR4A | <a href="#">CYS49(CB)</a> | 4.28 | <a href="#">THR365(CG2)</a> | 3GR4A |                                                                                                                        | C [ ] ... C [ ] |
| 3GR4A | <a href="#">CYS49(SG)</a> | 4.94 | <a href="#">THR365(CB)</a>  | 3GR4A |                                                                                                                        |                 |
| 3GR4A | <a href="#">CYS49(SG)</a> | 4.83 | <a href="#">THR365(OG1)</a> | 3GR4A | [D-A-AA]:47.1° [A-D-DD]:85.8°, maximum distance<br>exceeded, bad a_angle(sp3)                                          |                 |
| 3GR4A | <a href="#">CYS49(SG)</a> | 4.34 | <a href="#">THR365(CG2)</a> | 3GR4A |                                                                                                                        | S [ ] ... C [ ] |
| 3GR4A | <a href="#">CYS49(CB)</a> | 4.96 | <a href="#">VAL375(CG2)</a> | 3GR4A |                                                                                                                        |                 |
| 3GR4A | <a href="#">CYS49(SG)</a> | 4.68 | <a href="#">VAL375(CB)</a>  | 3GR4A |                                                                                                                        |                 |
| 3GR4A | <a href="#">CYS49(SG)</a> | 4.48 | <a href="#">VAL375(CG1)</a> | 3GR4A |                                                                                                                        | S [ ] ... C [ ] |
| 3GR4A | <a href="#">CYS49(SG)</a> | 3.67 | <a href="#">VAL375(CG2)</a> | 3GR4A |                                                                                                                        | S [ ] ... C [ ] |

| chain1 | res1/atm1                  | distance | res2/atm2                  | chain2 | H-bonding                                                                              | Charge interaction |
|--------|----------------------------|----------|----------------------------|--------|----------------------------------------------------------------------------------------|--------------------|
| 3GR4A  | <a href="#">CYS152(CB)</a> | 4.60     | <a href="#">GLY122(C)</a>  | 3GR4A  |                                                                                        |                    |
| 3GR4A  | <a href="#">CYS152(CB)</a> | 4.66     | <a href="#">GLY122(O)</a>  | 3GR4A  |                                                                                        |                    |
| 3GR4A  | <a href="#">CYS152(SG)</a> | 3.85     | <a href="#">GLY122(N)</a>  | 3GR4A  | [D-A-AA]:133.0° [A-D-DD]:73.1° d_planarity:-14.1°,<br>bad d_angle(sp2)                 | S [ ] ... N [ ]    |
| 3GR4A  | <a href="#">CYS152(SG)</a> | 3.70     | <a href="#">GLY122(CA)</a> | 3GR4A  |                                                                                        | S [ ] ... C [ ]    |
| 3GR4A  | <a href="#">CYS152(SG)</a> | 3.71     | <a href="#">GLY122(C)</a>  | 3GR4A  |                                                                                        | S [ ] ... C [ ]    |
| 3GR4A  | <a href="#">CYS152(SG)</a> | 4.10     | <a href="#">GLY122(O)</a>  | 3GR4A  |                                                                                        | S [ ] ... O [ ]    |
| 3GR4A  | <a href="#">CYS152(N)</a>  | 4.08     | <a href="#">LEU123(C)</a>  | 3GR4A  |                                                                                        | N [ ] ... C [ ]    |
| 3GR4A  | <a href="#">CYS152(N)</a>  | 2.94     | <a href="#">LEU123(O)</a>  | 3GR4A  | <b>H-bond</b> [D-A-AA]:151.8° [A-D-DD]:105.2° d_planarity:-<br>15.9° a_planarity:47.4° | N [ ] ... O [ ]    |
| 3GR4A  | <a href="#">CYS152(CA)</a> | 4.49     | <a href="#">LEU123(C)</a>  | 3GR4A  |                                                                                        | C [ ] ... C [ ]    |
| 3GR4A  | <a href="#">CYS152(CA)</a> | 3.61     | <a href="#">LEU123(O)</a>  | 3GR4A  |                                                                                        | C [ ] ... O [ ]    |
| 3GR4A  | <a href="#">CYS152(C)</a>  | 4.95     | <a href="#">LEU123(C)</a>  | 3GR4A  |                                                                                        |                    |
| 3GR4A  | <a href="#">CYS152(C)</a>  | 4.22     | <a href="#">LEU123(O)</a>  | 3GR4A  |                                                                                        | C [ ] ... O [ ]    |

|       |                            |      |                             |       |                                                                                                                        |               |
|-------|----------------------------|------|-----------------------------|-------|------------------------------------------------------------------------------------------------------------------------|---------------|
| 3GR4A | <a href="#">CYS152(O)</a>  | 4.61 | <a href="#">LEU123(C)</a>   | 3GR4A |                                                                                                                        |               |
| 3GR4A | <a href="#">CYS152(O)</a>  | 3.92 | <a href="#">LEU123(O)</a>   | 3GR4A |                                                                                                                        | O[ ] ... O[ ] |
| 3GR4A | <a href="#">CYS152(CB)</a> | 4.71 | <a href="#">LEU123(N)</a>   | 3GR4A |                                                                                                                        |               |
| 3GR4A | <a href="#">CYS152(CB)</a> | 4.92 | <a href="#">LEU123(CA)</a>  | 3GR4A |                                                                                                                        |               |
| 3GR4A | <a href="#">CYS152(CB)</a> | 3.87 | <a href="#">LEU123(C)</a>   | 3GR4A |                                                                                                                        | C[ ] ... C[ ] |
| 3GR4A | <a href="#">CYS152(CB)</a> | 3.32 | <a href="#">LEU123(O)</a>   | 3GR4A |                                                                                                                        | C[ ] ... O[ ] |
| 3GR4A | <a href="#">CYS152(SG)</a> | 4.01 | <a href="#">LEU123(N)</a>   | 3GR4A | [D-A-AA]:101.0° [A-D-DD]:111.8° d_planarity:76.7°,<br>maximum distance exceeded, bad d_planarity                       | S[ ] ... N[ ] |
| 3GR4A | <a href="#">CYS152(SG)</a> | 4.76 | <a href="#">LEU123(CA)</a>  | 3GR4A |                                                                                                                        |               |
| 3GR4A | <a href="#">CYS152(SG)</a> | 4.21 | <a href="#">LEU123(C)</a>   | 3GR4A |                                                                                                                        | S[ ] ... C[ ] |
| 3GR4A | <a href="#">CYS152(SG)</a> | 3.69 | <a href="#">LEU123(O)</a>   | 3GR4A |                                                                                                                        | S[ ] ... O[ ] |
| 3GR4A | <a href="#">CYS152(N)</a>  | 4.70 | <a href="#">ILE124(N)</a>   | 3GR4A |                                                                                                                        |               |
| 3GR4A | <a href="#">CYS152(N)</a>  | 4.47 | <a href="#">ILE124(CA)</a>  | 3GR4A |                                                                                                                        | N[ ] ... C[ ] |
| 3GR4A | <a href="#">CYS152(N)</a>  | 4.73 | <a href="#">ILE124(C)</a>   | 3GR4A |                                                                                                                        |               |
| 3GR4A | <a href="#">CYS152(CA)</a> | 4.82 | <a href="#">ILE124(N)</a>   | 3GR4A |                                                                                                                        |               |
| 3GR4A | <a href="#">CYS152(CA)</a> | 4.44 | <a href="#">ILE124(CA)</a>  | 3GR4A |                                                                                                                        | C[ ] ... C[ ] |
| 3GR4A | <a href="#">CYS152(CA)</a> | 4.42 | <a href="#">ILE124(CD1)</a> | 3GR4A |                                                                                                                        | C[ ] ... C[ ] |
| 3GR4A | <a href="#">CYS152(C)</a>  | 4.92 | <a href="#">ILE124(N)</a>   | 3GR4A |                                                                                                                        |               |
| 3GR4A | <a href="#">CYS152(C)</a>  | 4.10 | <a href="#">ILE124(CA)</a>  | 3GR4A |                                                                                                                        | C[ ] ... C[ ] |
| 3GR4A | <a href="#">CYS152(C)</a>  | 4.57 | <a href="#">ILE124(C)</a>   | 3GR4A |                                                                                                                        |               |
| 3GR4A | <a href="#">CYS152(C)</a>  | 4.85 | <a href="#">ILE124(CB)</a>  | 3GR4A |                                                                                                                        |               |
| 3GR4A | <a href="#">CYS152(C)</a>  | 4.87 | <a href="#">ILE124(CG1)</a> | 3GR4A |                                                                                                                        |               |
| 3GR4A | <a href="#">CYS152(C)</a>  | 4.87 | <a href="#">ILE124(CG2)</a> | 3GR4A |                                                                                                                        |               |
| 3GR4A | <a href="#">CYS152(C)</a>  | 3.84 | <a href="#">ILE124(CD1)</a> | 3GR4A |                                                                                                                        | C[ ] ... C[ ] |
| 3GR4A | <a href="#">CYS152(O)</a>  | 4.45 | <a href="#">ILE124(N)</a>   | 3GR4A | [D-A-AA]:105.1° [A-D-DD]:38.1° d_planarity:28.2°<br>a_planarity:-51.8°, maximum distance exceeded,<br>bad d_angle(sp2) | O[ ] ... N[ ] |
| 3GR4A | <a href="#">CYS152(O)</a>  | 3.42 | <a href="#">ILE124(CA)</a>  | 3GR4A |                                                                                                                        | O[ ] ... C[ ] |
| 3GR4A | <a href="#">CYS152(O)</a>  | 3.57 | <a href="#">ILE124(C)</a>   | 3GR4A |                                                                                                                        | O[ ] ... C[ ] |
| 3GR4A | <a href="#">CYS152(O)</a>  | 4.77 | <a href="#">ILE124(O)</a>   | 3GR4A |                                                                                                                        |               |
| 3GR4A | <a href="#">CYS152(O)</a>  | 4.22 | <a href="#">ILE124(CB)</a>  | 3GR4A |                                                                                                                        | O[ ] ... C[ ] |
| 3GR4A | <a href="#">CYS152(O)</a>  | 4.62 | <a href="#">ILE124(CG1)</a> | 3GR4A |                                                                                                                        |               |
| 3GR4A | <a href="#">CYS152(O)</a>  | 4.08 | <a href="#">ILE124(CG2)</a> | 3GR4A |                                                                                                                        | O[ ] ... C[ ] |
| 3GR4A | <a href="#">CYS152(O)</a>  | 3.88 | <a href="#">ILE124(CD1)</a> | 3GR4A |                                                                                                                        | O[ ] ... C[ ] |
| 3GR4A | <a href="#">CYS152(CB)</a> | 4.13 | <a href="#">ILE124(N)</a>   | 3GR4A |                                                                                                                        | C[ ] ... N[ ] |
| 3GR4A | <a href="#">CYS152(CB)</a> | 4.05 | <a href="#">ILE124(CA)</a>  | 3GR4A |                                                                                                                        | C[ ] ... C[ ] |
| 3GR4A | <a href="#">CYS152(CB)</a> | 4.92 | <a href="#">ILE124(CB)</a>  | 3GR4A |                                                                                                                        |               |
| 3GR4A | <a href="#">CYS152(CB)</a> | 4.52 | <a href="#">ILE124(CG1)</a> | 3GR4A |                                                                                                                        |               |
| 3GR4A | <a href="#">CYS152(CB)</a> | 3.67 | <a href="#">ILE124(CD1)</a> | 3GR4A |                                                                                                                        | C[ ] ... C[ ] |
| 3GR4A | <a href="#">CYS152(SG)</a> | 4.85 | <a href="#">ILE124(N)</a>   | 3GR4A | [D-A-AA]:56.1° [A-D-DD]:98.1° d_planarity:51.8°,<br>maximum distance exceeded, bad a_angle(sp3)                        |               |
| 3GR4A | <a href="#">CYS152(N)</a>  | 3.99 | <a href="#">LYS125(N)</a>   | 3GR4A |                                                                                                                        | N[ ] ... N[ ] |
| 3GR4A | <a href="#">CYS152(N)</a>  | 4.81 | <a href="#">LYS125(CA)</a>  | 3GR4A |                                                                                                                        |               |
| 3GR4A | <a href="#">CYS152(CA)</a> | 4.48 | <a href="#">LYS125(N)</a>   | 3GR4A |                                                                                                                        | C[ ] ... N[ ] |
| 3GR4A | <a href="#">CYS152(C)</a>  | 3.92 | <a href="#">LYS125(N)</a>   | 3GR4A |                                                                                                                        | C[ ] ... N[ ] |
| 3GR4A | <a href="#">CYS152(C)</a>  | 4.90 | <a href="#">LYS125(CA)</a>  | 3GR4A |                                                                                                                        |               |
| 3GR4A | <a href="#">CYS152(C)</a>  | 4.87 | <a href="#">LYS125(CG)</a>  | 3GR4A |                                                                                                                        |               |
| 3GR4A | <a href="#">CYS152(O)</a>  | 2.81 | <a href="#">LYS125(N)</a>   | 3GR4A | <b>H-bond</b> [D-A-AA]:150.3° [A-D-DD]:118.7° d_planarity:-<br>22.5° a_planarity:-24.6°                                | O[ ] ... N[ ] |
| 3GR4A | <a href="#">CYS152(O)</a>  | 3.73 | <a href="#">LYS125(CA)</a>  | 3GR4A |                                                                                                                        | O[ ] ... C[ ] |

|       |                            |      |                            |       |                                                                                                                         |               |
|-------|----------------------------|------|----------------------------|-------|-------------------------------------------------------------------------------------------------------------------------|---------------|
| 3GR4A | <a href="#">CYS152(O)</a>  | 4.28 | <a href="#">LYS125(CB)</a> | 3GR4A |                                                                                                                         | O[ ] ... C[ ] |
| 3GR4A | <a href="#">CYS152(O)</a>  | 3.71 | <a href="#">LYS125(CG)</a> | 3GR4A |                                                                                                                         | O[ ] ... C[ ] |
| 3GR4A | <a href="#">CYS152(CB)</a> | 4.88 | <a href="#">LYS125(N)</a>  | 3GR4A |                                                                                                                         |               |
| 3GR4A | <a href="#">CYS152(N)</a>  | 4.80 | <a href="#">TYR148(C)</a>  | 3GR4A |                                                                                                                         |               |
| 3GR4A | <a href="#">CYS152(N)</a>  | 3.71 | <a href="#">TYR148(O)</a>  | 3GR4A | [D-A-AA]:149.0° [A-D-DD]:111.3° d_planarity:-89.8°<br>a_planarity:-57.9°, maximum distance exceeded,<br>bad d_planarity | N[ ] ... O[ ] |
| 3GR4A | <a href="#">CYS152(CA)</a> | 4.45 | <a href="#">TYR148(O)</a>  | 3GR4A |                                                                                                                         | C[ ] ... O[ ] |
| 3GR4A | <a href="#">CYS152(CB)</a> | 4.79 | <a href="#">TYR148(O)</a>  | 3GR4A |                                                                                                                         |               |
| 3GR4A | <a href="#">CYS152(SG)</a> | 4.97 | <a href="#">TYR148(C)</a>  | 3GR4A |                                                                                                                         |               |
| 3GR4A | <a href="#">CYS152(SG)</a> | 3.80 | <a href="#">TYR148(O)</a>  | 3GR4A |                                                                                                                         | S[ ] ... O[ ] |
| 3GR4A | <a href="#">CYS152(SG)</a> | 4.81 | <a href="#">MET149(C)</a>  | 3GR4A |                                                                                                                         |               |
| 3GR4A | <a href="#">CYS152(SG)</a> | 4.54 | <a href="#">MET149(O)</a>  | 3GR4A |                                                                                                                         |               |
| 3GR4A | <a href="#">CYS152(N)</a>  | 4.89 | <a href="#">GLU150(N)</a>  | 3GR4A |                                                                                                                         |               |
| 3GR4A | <a href="#">CYS152(N)</a>  | 4.65 | <a href="#">GLU150(CA)</a> | 3GR4A |                                                                                                                         |               |
| 3GR4A | <a href="#">CYS152(N)</a>  | 3.67 | <a href="#">GLU150(C)</a>  | 3GR4A |                                                                                                                         | N[ ] ... C[ ] |
| 3GR4A | <a href="#">CYS152(N)</a>  | 4.15 | <a href="#">GLU150(O)</a>  | 3GR4A | [D-A-AA]:59.0° [A-D-DD]:161.2° d_planarity:-40.5°<br>a_planarity:39.7°, maximum distance exceeded,<br>bad a_angle(sp2)  | N[ ] ... O[ ] |
| 3GR4A | <a href="#">CYS152(N)</a>  | 2.77 | <a href="#">LYS151(N)</a>  | 3GR4A |                                                                                                                         | N[ ] ... N[ ] |
| 3GR4A | <a href="#">CYS152(N)</a>  | 2.44 | <a href="#">LYS151(CA)</a> | 3GR4A |                                                                                                                         | N[ ] ... C[ ] |
| 3GR4A | <a href="#">CYS152(N)</a>  | 2.26 | <a href="#">LYS151(O)</a>  | 3GR4A | [D-A-AA]:29.8° [A-D-DD]:94.3° d_planarity:1.3°<br>a_planarity:0.1°, bad a_angle(sp2)                                    | N[ ] ... O[ ] |
| 3GR4A | <a href="#">CYS152(N)</a>  | 3.74 | <a href="#">LYS151(CB)</a> | 3GR4A |                                                                                                                         | N[ ] ... C[ ] |
| 3GR4A | <a href="#">CYS152(CA)</a> | 4.20 | <a href="#">LYS151(N)</a>  | 3GR4A |                                                                                                                         | C[ ] ... N[ ] |
| 3GR4A | <a href="#">CYS152(CA)</a> | 3.82 | <a href="#">LYS151(CA)</a> | 3GR4A |                                                                                                                         | C[ ] ... C[ ] |
| 3GR4A | <a href="#">CYS152(CA)</a> | 2.45 | <a href="#">LYS151(C)</a>  | 3GR4A |                                                                                                                         | C[ ] ... C[ ] |
| 3GR4A | <a href="#">CYS152(CA)</a> | 2.78 | <a href="#">LYS151(O)</a>  | 3GR4A |                                                                                                                         | C[ ] ... O[ ] |
| 3GR4A | <a href="#">CYS152(CA)</a> | 4.97 | <a href="#">LYS151(CB)</a> | 3GR4A |                                                                                                                         |               |
| 3GR4A | <a href="#">CYS152(C)</a>  | 4.42 | <a href="#">LYS151(CA)</a> | 3GR4A |                                                                                                                         | C[ ] ... C[ ] |
| 3GR4A | <a href="#">CYS152(C)</a>  | 3.08 | <a href="#">LYS151(C)</a>  | 3GR4A |                                                                                                                         | C[ ] ... C[ ] |
| 3GR4A | <a href="#">CYS152(C)</a>  | 3.15 | <a href="#">LYS151(O)</a>  | 3GR4A |                                                                                                                         | C[ ] ... O[ ] |
| 3GR4A | <a href="#">CYS152(O)</a>  | 4.27 | <a href="#">LYS151(CA)</a> | 3GR4A |                                                                                                                         | O[ ] ... C[ ] |
| 3GR4A | <a href="#">CYS152(O)</a>  | 3.24 | <a href="#">LYS151(C)</a>  | 3GR4A |                                                                                                                         | O[ ] ... C[ ] |
| 3GR4A | <a href="#">CYS152(O)</a>  | 3.50 | <a href="#">LYS151(O)</a>  | 3GR4A |                                                                                                                         | O[ ] ... O[ ] |
| 3GR4A | <a href="#">CYS152(CB)</a> | 4.89 | <a href="#">LYS151(N)</a>  | 3GR4A |                                                                                                                         |               |
| 3GR4A | <a href="#">CYS152(CB)</a> | 4.90 | <a href="#">LYS151(CA)</a> | 3GR4A |                                                                                                                         |               |
| 3GR4A | <a href="#">CYS152(CB)</a> | 3.74 | <a href="#">LYS151(C)</a>  | 3GR4A |                                                                                                                         | C[ ] ... C[ ] |
| 3GR4A | <a href="#">CYS152(CB)</a> | 4.26 | <a href="#">LYS151(O)</a>  | 3GR4A |                                                                                                                         | C[ ] ... O[ ] |
| 3GR4A | <a href="#">CYS152(SG)</a> | 4.78 | <a href="#">LYS151(N)</a>  | 3GR4A | [D-A-AA]:82.5° [A-D-DD]:100.4° d_planarity:-55.0°,<br>maximum distance exceeded                                         |               |
| 3GR4A | <a href="#">CYS152(SG)</a> | 4.34 | <a href="#">LYS151(C)</a>  | 3GR4A |                                                                                                                         | S[ ] ... C[ ] |
| 3GR4A | <a href="#">CYS152(SG)</a> | 4.98 | <a href="#">LYS151(O)</a>  | 3GR4A | Weakly positive                                                                                                         |               |
| 3GR4A | <a href="#">CYS152(N)</a>  | 3.58 | <a href="#">ASP153(N)</a>  | 3GR4A |                                                                                                                         | N[ ] ... N[ ] |
| 3GR4A | <a href="#">CYS152(N)</a>  | 4.81 | <a href="#">ASP153(CA)</a> | 3GR4A |                                                                                                                         |               |
| 3GR4A | <a href="#">CYS152(CA)</a> | 2.42 | <a href="#">ASP153(N)</a>  | 3GR4A |                                                                                                                         | C[ ] ... N[ ] |
| 3GR4A | <a href="#">CYS152(CA)</a> | 3.80 | <a href="#">ASP153(CA)</a> | 3GR4A |                                                                                                                         | C[ ] ... C[ ] |
| 3GR4A | <a href="#">CYS152(CA)</a> | 4.85 | <a href="#">ASP153(C)</a>  | 3GR4A |                                                                                                                         |               |
| 3GR4A | <a href="#">CYS152(CA)</a> | 4.82 | <a href="#">ASP153(O)</a>  | 3GR4A |                                                                                                                         |               |
| 3GR4A | <a href="#">CYS152(CA)</a> | 4.45 | <a href="#">ASP153(CB)</a> | 3GR4A |                                                                                                                         | C[ ] ... C[ ] |
| 3GR4A | <a href="#">CYS152(CA)</a> | 4.82 | <a href="#">ASP153(CG)</a> | 3GR4A |                                                                                                                         |               |

|       |                             |      |                              |       |                                                                                                                       |               |
|-------|-----------------------------|------|------------------------------|-------|-----------------------------------------------------------------------------------------------------------------------|---------------|
| 3GR4A | <a href="#">CYS152</a> (CA) | 4.99 | <a href="#">ASP153</a> (OD1) | 3GR4A |                                                                                                                       |               |
| 3GR4A | <a href="#">CYS152</a> (C)  | 2.43 | <a href="#">ASP153</a> (CA)  | 3GR4A |                                                                                                                       | C[ ] ... C[ ] |
| 3GR4A | <a href="#">CYS152</a> (C)  | 3.71 | <a href="#">ASP153</a> (C)   | 3GR4A |                                                                                                                       | C[ ] ... C[ ] |
| 3GR4A | <a href="#">CYS152</a> (C)  | 3.99 | <a href="#">ASP153</a> (O)   | 3GR4A |                                                                                                                       | C[ ] ... O[ ] |
| 3GR4A | <a href="#">CYS152</a> (C)  | 3.08 | <a href="#">ASP153</a> (CB)  | 3GR4A |                                                                                                                       | C[ ] ... C[ ] |
| 3GR4A | <a href="#">CYS152</a> (C)  | 3.76 | <a href="#">ASP153</a> (CG)  | 3GR4A |                                                                                                                       | C[ ] ... C[ ] |
| 3GR4A | <a href="#">CYS152</a> (C)  | 4.13 | <a href="#">ASP153</a> (OD1) | 3GR4A |                                                                                                                       | C[ ] ... O[-] |
| 3GR4A | <a href="#">CYS152</a> (C)  | 4.49 | <a href="#">ASP153</a> (OD2) | 3GR4A |                                                                                                                       | C[ ] ... O[-] |
| 3GR4A | <a href="#">CYS152</a> (O)  | 2.25 | <a href="#">ASP153</a> (N)   | 3GR4A | [D-A-AA]:29.5° [A-D-DD]:94.3° d_planarity:1.0°<br>a_planarity:1.8°, bad a_angle(sp2)                                  | O[ ] ... N[ ] |
| 3GR4A | <a href="#">CYS152</a> (O)  | 2.77 | <a href="#">ASP153</a> (CA)  | 3GR4A |                                                                                                                       | O[ ] ... C[ ] |
| 3GR4A | <a href="#">CYS152</a> (O)  | 4.25 | <a href="#">ASP153</a> (C)   | 3GR4A |                                                                                                                       | O[ ] ... C[ ] |
| 3GR4A | <a href="#">CYS152</a> (O)  | 4.78 | <a href="#">ASP153</a> (O)   | 3GR4A |                                                                                                                       |               |
| 3GR4A | <a href="#">CYS152</a> (O)  | 3.06 | <a href="#">ASP153</a> (CB)  | 3GR4A |                                                                                                                       | O[ ] ... C[ ] |
| 3GR4A | <a href="#">CYS152</a> (O)  | 4.04 | <a href="#">ASP153</a> (CG)  | 3GR4A |                                                                                                                       | O[ ] ... C[ ] |
| 3GR4A | <a href="#">CYS152</a> (O)  | 4.71 | <a href="#">ASP153</a> (OD1) | 3GR4A |                                                                                                                       |               |
| 3GR4A | <a href="#">CYS152</a> (O)  | 4.58 | <a href="#">ASP153</a> (OD2) | 3GR4A |                                                                                                                       |               |
| 3GR4A | <a href="#">CYS152</a> (CB) | 3.19 | <a href="#">ASP153</a> (N)   | 3GR4A |                                                                                                                       | C[ ] ... N[ ] |
| 3GR4A | <a href="#">CYS152</a> (CB) | 4.50 | <a href="#">ASP153</a> (CA)  | 3GR4A |                                                                                                                       | C[ ] ... C[ ] |
| 3GR4A | <a href="#">CYS152</a> (SG) | 4.83 | <a href="#">ASP153</a> (N)   | 3GR4A | [D-A-AA]:20.7° [A-D-DD]:158.7° d_planarity:67.2°,<br>maximum distance exceeded, bad a_angle(sp3),<br>bad d_planarity  |               |
| 3GR4A | <a href="#">CYS152</a> (C)  | 4.84 | <a href="#">GLU154</a> (N)   | 3GR4A |                                                                                                                       |               |
| 3GR4A | <a href="#">CYS152</a> (N)  | 4.57 | <a href="#">ILE156</a> (O)   | 3GR4A | [D-A-AA]:142.4° [A-D-DD]:29.1° d_planarity:38.1°<br>a_planarity:76.7°, maximum distance exceeded,<br>bad d_angle(sp2) |               |
| 3GR4A | <a href="#">CYS152</a> (CA) | 4.50 | <a href="#">ILE156</a> (C)   | 3GR4A |                                                                                                                       | C[ ] ... C[ ] |
| 3GR4A | <a href="#">CYS152</a> (CA) | 3.37 | <a href="#">ILE156</a> (O)   | 3GR4A |                                                                                                                       | C[ ] ... O[ ] |
| 3GR4A | <a href="#">CYS152</a> (CA) | 4.78 | <a href="#">ILE156</a> (CG2) | 3GR4A |                                                                                                                       |               |
| 3GR4A | <a href="#">CYS152</a> (C)  | 4.89 | <a href="#">ILE156</a> (C)   | 3GR4A |                                                                                                                       |               |
| 3GR4A | <a href="#">CYS152</a> (C)  | 3.67 | <a href="#">ILE156</a> (O)   | 3GR4A |                                                                                                                       | C[ ] ... O[ ] |
| 3GR4A | <a href="#">CYS152</a> (O)  | 4.88 | <a href="#">ILE156</a> (O)   | 3GR4A |                                                                                                                       |               |
| 3GR4A | <a href="#">CYS152</a> (CB) | 4.86 | <a href="#">ILE156</a> (C)   | 3GR4A |                                                                                                                       |               |
| 3GR4A | <a href="#">CYS152</a> (CB) | 3.83 | <a href="#">ILE156</a> (O)   | 3GR4A |                                                                                                                       | C[ ] ... O[ ] |
| 3GR4A | <a href="#">CYS152</a> (SG) | 4.51 | <a href="#">ILE156</a> (O)   | 3GR4A |                                                                                                                       |               |
| 3GR4A | <a href="#">CYS152</a> (CA) | 4.87 | <a href="#">LEU157</a> (CA)  | 3GR4A |                                                                                                                       |               |
| 3GR4A | <a href="#">CYS152</a> (CB) | 4.49 | <a href="#">LEU157</a> (CA)  | 3GR4A |                                                                                                                       | C[ ] ... C[ ] |
| 3GR4A | <a href="#">CYS152</a> (CB) | 4.02 | <a href="#">LEU157</a> (CD1) | 3GR4A |                                                                                                                       | C[ ] ... C[ ] |
| 3GR4A | <a href="#">CYS152</a> (SG) | 4.20 | <a href="#">LEU157</a> (CA)  | 3GR4A |                                                                                                                       | S[ ] ... C[ ] |
| 3GR4A | <a href="#">CYS152</a> (SG) | 4.31 | <a href="#">LEU157</a> (C)   | 3GR4A |                                                                                                                       | S[ ] ... C[ ] |
| 3GR4A | <a href="#">CYS152</a> (SG) | 4.90 | <a href="#">LEU157</a> (CG)  | 3GR4A |                                                                                                                       |               |
| 3GR4A | <a href="#">CYS152</a> (SG) | 3.80 | <a href="#">LEU157</a> (CD1) | 3GR4A |                                                                                                                       | S[ ] ... C[ ] |
| 3GR4A | <a href="#">CYS152</a> (CB) | 4.68 | <a href="#">TRP158</a> (N)   | 3GR4A |                                                                                                                       |               |
| 3GR4A | <a href="#">CYS152</a> (SG) | 3.46 | <a href="#">TRP158</a> (N)   | 3GR4A | <b>H-bond</b> [D-A-AA]:121.5° [A-D-DD]:112.6° d_planarity:-<br>19.9°                                                  | S[ ] ... N[ ] |
| 3GR4A | <a href="#">CYS152</a> (SG) | 4.24 | <a href="#">TRP158</a> (CA)  | 3GR4A |                                                                                                                       | S[ ] ... C[ ] |
| 3GR4A | <a href="#">CYS152</a> (SG) | 4.57 | <a href="#">TRP158</a> (C)   | 3GR4A |                                                                                                                       |               |
| 3GR4A | <a href="#">CYS152</a> (SG) | 3.97 | <a href="#">TRP158</a> (O)   | 3GR4A |                                                                                                                       | S[ ] ... O[ ] |
| 3GR4A | <a href="#">CYS152</a> (SG) | 4.08 | <a href="#">TRP158</a> (CB)  | 3GR4A |                                                                                                                       | S[ ] ... C[ ] |

| chain1 | res1/atm1                  | distance | res2/atm2                   | chain2 | H-bonding                                                                                                                               | Charge interaction |
|--------|----------------------------|----------|-----------------------------|--------|-----------------------------------------------------------------------------------------------------------------------------------------|--------------------|
| 3GR4A  | <a href="#">CYS326(N)</a>  | 4.99     | <a href="#">VAL292(N)</a>   | 3GR4A  |                                                                                                                                         |                    |
| 3GR4A  | <a href="#">CYS326(CA)</a> | 4.99     | <a href="#">VAL292(N)</a>   | 3GR4A  |                                                                                                                                         |                    |
| 3GR4A  | <a href="#">CYS326(CA)</a> | 4.42     | <a href="#">VAL292(O)</a>   | 3GR4A  |                                                                                                                                         | C[ ] ... O[ ]      |
| 3GR4A  | <a href="#">CYS326(CA)</a> | 4.60     | <a href="#">VAL292(CB)</a>  | 3GR4A  |                                                                                                                                         |                    |
| 3GR4A  | <a href="#">CYS326(C)</a>  | 4.27     | <a href="#">VAL292(O)</a>   | 3GR4A  |                                                                                                                                         | C[ ] ... O[ ]      |
| 3GR4A  | <a href="#">CYS326(SG)</a> | 4.97     | <a href="#">ARG294(CG)</a>  | 3GR4A  |                                                                                                                                         |                    |
| 3GR4A  | <a href="#">CYS326(SG)</a> | 4.12     | <a href="#">ARG294(CD)</a>  | 3GR4A  |                                                                                                                                         | S[ ] ... C[ ]      |
| 3GR4A  | <a href="#">CYS326(SG)</a> | 3.95     | <a href="#">ARG294(NE)</a>  | 3GR4A  | [D-A-AA]:145.2° [A-D-DD]:73.8° d_planarity:73.9°,<br>bad d_angle(sp2), bad d_planarity                                                  | S[ ] ... N[ ]      |
| 3GR4A  | <a href="#">CYS326(SG)</a> | 3.80     | <a href="#">ARG294(CZ)</a>  | 3GR4A  | Positive                                                                                                                                | S[ ] ... C[ ]      |
| 3GR4A  | <a href="#">CYS326(SG)</a> | 3.71     | <a href="#">ARG294(NH1)</a> | 3GR4A  | [D-A-AA]:176.1° [A-D-DD]:83.3° d_planarity:-77.5°,<br>bad d_angle(sp2), bad d_planarity                                                 | S[ ] ... N[+]      |
| 3GR4A  | <a href="#">CYS326(SG)</a> | 4.39     | <a href="#">ARG294(NH2)</a> | 3GR4A  | [D-A-AA]:144.9° [A-D-DD]:55.5° d_planarity:84.0°,<br>maximum distance exceeded, bad d_angle(sp2),<br>bad d_planarity                    | S[ ] ... N[+]      |
| 3GR4A  | <a href="#">CYS326(CB)</a> | 4.95     | <a href="#">GLN310(CD)</a>  | 3GR4A  |                                                                                                                                         |                    |
| 3GR4A  | <a href="#">CYS326(CB)</a> | 4.82     | <a href="#">GLN310(NE2)</a> | 3GR4A  |                                                                                                                                         |                    |
| 3GR4A  | <a href="#">CYS326(SG)</a> | 4.70     | <a href="#">GLN310(CG)</a>  | 3GR4A  |                                                                                                                                         |                    |
| 3GR4A  | <a href="#">CYS326(SG)</a> | 3.84     | <a href="#">GLN310(CD)</a>  | 3GR4A  |                                                                                                                                         | S[ ] ... C[ ]      |
| 3GR4A  | <a href="#">CYS326(SG)</a> | 3.72     | <a href="#">GLN310(OE1)</a> | 3GR4A  |                                                                                                                                         | S[ ] ... O[ ]      |
| 3GR4A  | <a href="#">CYS326(SG)</a> | 3.84     | <a href="#">GLN310(NE2)</a> | 3GR4A  | [D-A-AA]:113.4° [A-D-DD]:79.9° d_planarity:65.4°,<br>bad d_angle(sp2), bad d_planarity                                                  | S[ ] ... N[ ]      |
| 3GR4A  | <a href="#">CYS326(CB)</a> | 4.99     | <a href="#">ILE314(CD1)</a> | 3GR4A  |                                                                                                                                         |                    |
| 3GR4A  | <a href="#">CYS326(N)</a>  | 4.27     | <a href="#">VAL324(C)</a>   | 3GR4A  |                                                                                                                                         | N[ ] ... C[ ]      |
| 3GR4A  | <a href="#">CYS326(N)</a>  | 4.30     | <a href="#">VAL324(O)</a>   | 3GR4A  | [D-A-AA]:80.0° [A-D-DD]:155.1° d_planarity:-86.8°<br>a_planarity:25.9°, maximum distance exceeded,<br>bad a_angle(sp2), bad d_planarity | N[ ] ... O[ ]      |
| 3GR4A  | <a href="#">CYS326(N)</a>  | 3.52     | <a href="#">ILE325(N)</a>   | 3GR4A  |                                                                                                                                         | N[ ] ... N[ ]      |
| 3GR4A  | <a href="#">CYS326(N)</a>  | 2.45     | <a href="#">ILE325(CA)</a>  | 3GR4A  |                                                                                                                                         | N[ ] ... C[ ]      |
| 3GR4A  | <a href="#">CYS326(N)</a>  | 2.24     | <a href="#">ILE325(O)</a>   | 3GR4A  | [D-A-AA]:30.0° [A-D-DD]:95.2° d_planarity:5.1°<br>a_planarity:1.1°, bad a_angle(sp2)                                                    | N[ ] ... O[ ]      |
| 3GR4A  | <a href="#">CYS326(N)</a>  | 3.42     | <a href="#">ILE325(CB)</a>  | 3GR4A  |                                                                                                                                         | N[ ] ... C[ ]      |
| 3GR4A  | <a href="#">CYS326(N)</a>  | 4.72     | <a href="#">ILE325(CG1)</a> | 3GR4A  |                                                                                                                                         |                    |
| 3GR4A  | <a href="#">CYS326(N)</a>  | 3.38     | <a href="#">ILE325(CG2)</a> | 3GR4A  |                                                                                                                                         | N[ ] ... C[ ]      |
| 3GR4A  | <a href="#">CYS326(CA)</a> | 4.82     | <a href="#">ILE325(N)</a>   | 3GR4A  |                                                                                                                                         |                    |
| 3GR4A  | <a href="#">CYS326(CA)</a> | 3.83     | <a href="#">ILE325(CA)</a>  | 3GR4A  |                                                                                                                                         | C[ ] ... C[ ]      |
| 3GR4A  | <a href="#">CYS326(CA)</a> | 2.45     | <a href="#">ILE325(C)</a>   | 3GR4A  |                                                                                                                                         | C[ ] ... C[ ]      |
| 3GR4A  | <a href="#">CYS326(CA)</a> | 2.79     | <a href="#">ILE325(O)</a>   | 3GR4A  |                                                                                                                                         | C[ ] ... O[ ]      |
| 3GR4A  | <a href="#">CYS326(CA)</a> | 4.60     | <a href="#">ILE325(CB)</a>  | 3GR4A  |                                                                                                                                         |                    |
| 3GR4A  | <a href="#">CYS326(CA)</a> | 4.31     | <a href="#">ILE325(CG2)</a> | 3GR4A  |                                                                                                                                         | C[ ] ... C[ ]      |
| 3GR4A  | <a href="#">CYS326(C)</a>  | 4.45     | <a href="#">ILE325(CA)</a>  | 3GR4A  |                                                                                                                                         | C[ ] ... C[ ]      |
| 3GR4A  | <a href="#">CYS326(C)</a>  | 3.23     | <a href="#">ILE325(C)</a>   | 3GR4A  |                                                                                                                                         | C[ ] ... C[ ]      |
| 3GR4A  | <a href="#">CYS326(C)</a>  | 3.54     | <a href="#">ILE325(O)</a>   | 3GR4A  |                                                                                                                                         | C[ ] ... O[ ]      |
| 3GR4A  | <a href="#">CYS326(C)</a>  | 4.74     | <a href="#">ILE325(CB)</a>  | 3GR4A  |                                                                                                                                         |                    |
| 3GR4A  | <a href="#">CYS326(C)</a>  | 3.98     | <a href="#">ILE325(CG2)</a> | 3GR4A  |                                                                                                                                         | C[ ] ... C[ ]      |
| 3GR4A  | <a href="#">CYS326(O)</a>  | 4.63     | <a href="#">ILE325(CA)</a>  | 3GR4A  |                                                                                                                                         |                    |
| 3GR4A  | <a href="#">CYS326(O)</a>  | 3.74     | <a href="#">ILE325(C)</a>   | 3GR4A  |                                                                                                                                         | O[ ] ... C[ ]      |
| 3GR4A  | <a href="#">CYS326(O)</a>  | 4.32     | <a href="#">ILE325(O)</a>   | 3GR4A  |                                                                                                                                         | O[ ] ... O[ ]      |
| 3GR4A  | <a href="#">CYS326(O)</a>  | 4.79     | <a href="#">ILE325(CB)</a>  | 3GR4A  |                                                                                                                                         |                    |
| 3GR4A  | <a href="#">CYS326(O)</a>  | 3.75     | <a href="#">ILE325(CG2)</a> | 3GR4A  |                                                                                                                                         | O[ ] ... C[ ]      |

|       |                             |      |                             |       |                                                                                                                                        |               |
|-------|-----------------------------|------|-----------------------------|-------|----------------------------------------------------------------------------------------------------------------------------------------|---------------|
| 3GR4A | <a href="#">CYS326</a> (CB) | 4.90 | <a href="#">ILE325</a> (CA) | 3GR4A |                                                                                                                                        |               |
| 3GR4A | <a href="#">CYS326</a> (CB) | 3.68 | <a href="#">ILE325</a> (C)  | 3GR4A |                                                                                                                                        | C[ ] ... C[ ] |
| 3GR4A | <a href="#">CYS326</a> (CB) | 4.11 | <a href="#">ILE325</a> (O)  | 3GR4A |                                                                                                                                        | C[ ] ... O[ ] |
| 3GR4A | <a href="#">CYS326</a> (N)  | 3.45 | <a href="#">ALA327</a> (N)  | 3GR4A |                                                                                                                                        | N[ ] ... N[ ] |
| 3GR4A | <a href="#">CYS326</a> (N)  | 4.63 | <a href="#">ALA327</a> (CA) | 3GR4A |                                                                                                                                        |               |
| 3GR4A | <a href="#">CYS326</a> (CA) | 2.42 | <a href="#">ALA327</a> (N)  | 3GR4A |                                                                                                                                        | C[ ] ... N[ ] |
| 3GR4A | <a href="#">CYS326</a> (CA) | 3.78 | <a href="#">ALA327</a> (CA) | 3GR4A |                                                                                                                                        | C[ ] ... C[ ] |
| 3GR4A | <a href="#">CYS326</a> (CA) | 4.81 | <a href="#">ALA327</a> (C)  | 3GR4A |                                                                                                                                        |               |
| 3GR4A | <a href="#">CYS326</a> (CA) | 4.95 | <a href="#">ALA327</a> (O)  | 3GR4A |                                                                                                                                        |               |
| 3GR4A | <a href="#">CYS326</a> (CA) | 4.54 | <a href="#">ALA327</a> (CB) | 3GR4A |                                                                                                                                        |               |
| 3GR4A | <a href="#">CYS326</a> (C)  | 2.43 | <a href="#">ALA327</a> (CA) | 3GR4A |                                                                                                                                        | C[ ] ... C[ ] |
| 3GR4A | <a href="#">CYS326</a> (C)  | 3.58 | <a href="#">ALA327</a> (C)  | 3GR4A |                                                                                                                                        | C[ ] ... C[ ] |
| 3GR4A | <a href="#">CYS326</a> (C)  | 4.02 | <a href="#">ALA327</a> (O)  | 3GR4A |                                                                                                                                        | C[ ] ... O[ ] |
| 3GR4A | <a href="#">CYS326</a> (C)  | 3.36 | <a href="#">ALA327</a> (CB) | 3GR4A |                                                                                                                                        | C[ ] ... C[ ] |
| 3GR4A | <a href="#">CYS326</a> (O)  | 2.25 | <a href="#">ALA327</a> (N)  | 3GR4A | [D-A-AA]:29.6° [A-D-DD]:95.7° d_planarity:3.1°<br>a_planarity:0.1°, bad a_angle(sp2)                                                   | O[ ] ... N[ ] |
| 3GR4A | <a href="#">CYS326</a> (O)  | 2.79 | <a href="#">ALA327</a> (CA) | 3GR4A |                                                                                                                                        | O[ ] ... C[ ] |
| 3GR4A | <a href="#">CYS326</a> (O)  | 3.98 | <a href="#">ALA327</a> (C)  | 3GR4A |                                                                                                                                        | O[ ] ... C[ ] |
| 3GR4A | <a href="#">CYS326</a> (O)  | 4.68 | <a href="#">ALA327</a> (O)  | 3GR4A |                                                                                                                                        |               |
| 3GR4A | <a href="#">CYS326</a> (O)  | 3.75 | <a href="#">ALA327</a> (CB) | 3GR4A |                                                                                                                                        | O[ ] ... C[ ] |
| 3GR4A | <a href="#">CYS326</a> (CB) | 3.42 | <a href="#">ALA327</a> (N)  | 3GR4A |                                                                                                                                        | C[ ] ... N[ ] |
| 3GR4A | <a href="#">CYS326</a> (CB) | 4.71 | <a href="#">ALA327</a> (CA) | 3GR4A |                                                                                                                                        |               |
| 3GR4A | <a href="#">CYS326</a> (SG) | 3.59 | <a href="#">ALA327</a> (N)  | 3GR4A | [D-A-AA]:70.3° [A-D-DD]:136.8° d_planarity:84.8°,<br>bad d_planarity                                                                   | S[ ] ... N[ ] |
| 3GR4A | <a href="#">CYS326</a> (SG) | 4.73 | <a href="#">ALA327</a> (CA) | 3GR4A |                                                                                                                                        |               |
| 3GR4A | <a href="#">CYS326</a> (SG) | 4.97 | <a href="#">ALA327</a> (C)  | 3GR4A |                                                                                                                                        |               |
| 3GR4A | <a href="#">CYS326</a> (SG) | 4.70 | <a href="#">ALA327</a> (O)  | 3GR4A |                                                                                                                                        |               |
| 3GR4A | <a href="#">CYS326</a> (C)  | 4.53 | <a href="#">THR328</a> (N)  | 3GR4A |                                                                                                                                        |               |
| 3GR4A | <a href="#">CYS326</a> (O)  | 4.62 | <a href="#">THR328</a> (N)  | 3GR4A | [D-A-AA]:78.4° [A-D-DD]:171.0° d_planarity:83.9°<br>a_planarity:15.8°, maximum distance exceeded,<br>bad a_angle(sp2), bad d_planarity |               |
| 3GR4A | <a href="#">CYS326</a> (CA) | 4.93 | <a href="#">MET330</a> (SD) | 3GR4A |                                                                                                                                        |               |
| 3GR4A | <a href="#">CYS326</a> (C)  | 4.14 | <a href="#">MET330</a> (SD) | 3GR4A |                                                                                                                                        | C[ ] ... S[ ] |
| 3GR4A | <a href="#">CYS326</a> (O)  | 4.65 | <a href="#">MET330</a> (CG) | 3GR4A |                                                                                                                                        |               |
| 3GR4A | <a href="#">CYS326</a> (O)  | 3.54 | <a href="#">MET330</a> (SD) | 3GR4A |                                                                                                                                        | O[ ] ... S[ ] |
| 3GR4A | <a href="#">CYS326</a> (O)  | 4.73 | <a href="#">MET330</a> (CE) | 3GR4A |                                                                                                                                        |               |
| 3GR4A | <a href="#">CYS326</a> (CB) | 4.37 | <a href="#">MET330</a> (SD) | 3GR4A |                                                                                                                                        | C[ ] ... S[ ] |
| 3GR4A | <a href="#">CYS326</a> (CB) | 4.37 | <a href="#">MET330</a> (CE) | 3GR4A |                                                                                                                                        | C[ ] ... C[ ] |
| 3GR4A | <a href="#">CYS326</a> (SG) | 4.85 | <a href="#">MET330</a> (CG) | 3GR4A |                                                                                                                                        |               |
| 3GR4A | <a href="#">CYS326</a> (SG) | 4.21 | <a href="#">MET330</a> (SD) | 3GR4A |                                                                                                                                        | S[ ] ... S[ ] |
| 3GR4A | <a href="#">CYS326</a> (SG) | 3.93 | <a href="#">MET330</a> (CE) | 3GR4A |                                                                                                                                        | S[ ] ... C[ ] |
| 3GR4A | <a href="#">CYS326</a> (CB) | 3.99 | <a href="#">ALA351</a> (CB) | 3GR4A |                                                                                                                                        | C[ ] ... C[ ] |
| 3GR4A | <a href="#">CYS326</a> (SG) | 3.94 | <a href="#">ALA351</a> (CB) | 3GR4A |                                                                                                                                        | S[ ] ... C[ ] |
| 3GR4A | <a href="#">CYS326</a> (N)  | 4.39 | <a href="#">ALA356</a> (CB) | 3GR4A |                                                                                                                                        | N[ ] ... C[ ] |
| 3GR4A | <a href="#">CYS326</a> (CA) | 4.97 | <a href="#">ALA356</a> (CB) | 3GR4A |                                                                                                                                        |               |
| 3GR4A | <a href="#">CYS326</a> (CB) | 4.29 | <a href="#">ALA356</a> (CB) | 3GR4A |                                                                                                                                        | C[ ] ... C[ ] |
| 3GR4A | <a href="#">CYS326</a> (N)  | 4.22 | <a href="#">CYS358</a> (C)  | 3GR4A |                                                                                                                                        | N[ ] ... C[ ] |
| 3GR4A | <a href="#">CYS326</a> (N)  | 3.08 | <a href="#">CYS358</a> (O)  | 3GR4A | <b>H-bond</b> [D-A-AA]:155.2° [A-D-DD]:126.6° d_planarity:-<br>10.0° a_planarity:65.0°                                                 | N[ ] ... O[ ] |
| 3GR4A | <a href="#">CYS326</a> (CA) | 4.13 | <a href="#">CYS358</a> (O)  | 3GR4A |                                                                                                                                        | C[ ] ... O[ ] |

|       |                            |      |                             |       |                                                                                                                        |                 |
|-------|----------------------------|------|-----------------------------|-------|------------------------------------------------------------------------------------------------------------------------|-----------------|
| 3GR4A | <a href="#">CYS326(C)</a>  | 4.55 | <a href="#">CYS358(O)</a>   | 3GR4A |                                                                                                                        |                 |
| 3GR4A | <a href="#">CYS326(O)</a>  | 4.72 | <a href="#">CYS358(C)</a>   | 3GR4A |                                                                                                                        |                 |
| 3GR4A | <a href="#">CYS326(O)</a>  | 4.04 | <a href="#">CYS358(O)</a>   | 3GR4A |                                                                                                                        | O [ ] ... O [ ] |
| 3GR4A | <a href="#">CYS326(CB)</a> | 4.26 | <a href="#">CYS358(O)</a>   | 3GR4A |                                                                                                                        | C [ ] ... O [ ] |
| 3GR4A | <a href="#">CYS326(N)</a>  | 4.90 | <a href="#">ILE359(N)</a>   | 3GR4A |                                                                                                                        |                 |
| 3GR4A | <a href="#">CYS326(N)</a>  | 4.63 | <a href="#">ILE359(CA)</a>  | 3GR4A |                                                                                                                        |                 |
| 3GR4A | <a href="#">CYS326(C)</a>  | 4.68 | <a href="#">ILE359(CA)</a>  | 3GR4A |                                                                                                                        |                 |
| 3GR4A | <a href="#">CYS326(C)</a>  | 4.98 | <a href="#">ILE359(C)</a>   | 3GR4A |                                                                                                                        |                 |
| 3GR4A | <a href="#">CYS326(O)</a>  | 4.62 | <a href="#">ILE359(N)</a>   | 3GR4A | [D-A-AA]:136.1° [A-D-DD]:39.2° d_planarity:28.5°<br>a_planarity:-16.1°, maximum distance exceeded,<br>bad d_angle(sp2) |                 |
| 3GR4A | <a href="#">CYS326(O)</a>  | 3.61 | <a href="#">ILE359(CA)</a>  | 3GR4A |                                                                                                                        | O [ ] ... C [ ] |
| 3GR4A | <a href="#">CYS326(O)</a>  | 3.79 | <a href="#">ILE359(C)</a>   | 3GR4A |                                                                                                                        | O [ ] ... C [ ] |
| 3GR4A | <a href="#">CYS326(O)</a>  | 4.87 | <a href="#">ILE359(O)</a>   | 3GR4A |                                                                                                                        |                 |
| 3GR4A | <a href="#">CYS326(O)</a>  | 4.45 | <a href="#">ILE359(CB)</a>  | 3GR4A |                                                                                                                        | O [ ] ... C [ ] |
| 3GR4A | <a href="#">CYS326(O)</a>  | 4.75 | <a href="#">ILE359(CG2)</a> | 3GR4A |                                                                                                                        |                 |
| 3GR4A | <a href="#">CYS326(CB)</a> | 4.99 | <a href="#">ILE359(CA)</a>  | 3GR4A |                                                                                                                        |                 |
| 3GR4A | <a href="#">CYS326(CB)</a> | 4.63 | <a href="#">ILE359(CG2)</a> | 3GR4A |                                                                                                                        |                 |
| 3GR4A | <a href="#">CYS326(C)</a>  | 4.43 | <a href="#">MET360(N)</a>   | 3GR4A |                                                                                                                        | C [ ] ... N [ ] |
| 3GR4A | <a href="#">CYS326(C)</a>  | 4.59 | <a href="#">MET360(CB)</a>  | 3GR4A |                                                                                                                        |                 |
| 3GR4A | <a href="#">CYS326(O)</a>  | 3.23 | <a href="#">MET360(N)</a>   | 3GR4A | <b>H-bond</b> [D-A-AA]:171.8° [A-D-DD]:113.4° d_planarity:-<br>55.2° a_planarity:11.4°                                 | O [ ] ... N [ ] |
| 3GR4A | <a href="#">CYS326(O)</a>  | 4.04 | <a href="#">MET360(CA)</a>  | 3GR4A |                                                                                                                        | O [ ] ... C [ ] |
| 3GR4A | <a href="#">CYS326(O)</a>  | 4.85 | <a href="#">MET360(C)</a>   | 3GR4A |                                                                                                                        |                 |
| 3GR4A | <a href="#">CYS326(O)</a>  | 4.68 | <a href="#">MET360(O)</a>   | 3GR4A |                                                                                                                        |                 |
| 3GR4A | <a href="#">CYS326(O)</a>  | 3.69 | <a href="#">MET360(CB)</a>  | 3GR4A |                                                                                                                        | O [ ] ... C [ ] |

| chain1 | res1/atm1                  | distance | res2/atm2                  | chain2 | H-bonding                                                                                                             | Charge interaction |
|--------|----------------------------|----------|----------------------------|--------|-----------------------------------------------------------------------------------------------------------------------|--------------------|
| 3GR4A  | <a href="#">CYS358(N)</a>  | 4.08     | <a href="#">THR45(CG2)</a> | 3GR4A  |                                                                                                                       | N [ ] ... C [ ]    |
| 3GR4A  | <a href="#">CYS358(CA)</a> | 4.85     | <a href="#">THR45(C)</a>   | 3GR4A  |                                                                                                                       |                    |
| 3GR4A  | <a href="#">CYS358(CA)</a> | 3.80     | <a href="#">THR45(CG2)</a> | 3GR4A  |                                                                                                                       | C [ ] ... C [ ]    |
| 3GR4A  | <a href="#">CYS358(C)</a>  | 3.98     | <a href="#">THR45(CG2)</a> | 3GR4A  |                                                                                                                       | C [ ] ... C [ ]    |
| 3GR4A  | <a href="#">CYS358(O)</a>  | 4.74     | <a href="#">THR45(CG2)</a> | 3GR4A  |                                                                                                                       |                    |
| 3GR4A  | <a href="#">CYS358(N)</a>  | 4.69     | <a href="#">GLY46(N)</a>   | 3GR4A  |                                                                                                                       |                    |
| 3GR4A  | <a href="#">CYS358(N)</a>  | 4.48     | <a href="#">GLY46(O)</a>   | 3GR4A  | [D-A-AA]:125.2° [A-D-DD]:24.1° d_planarity:7.0°<br>a_planarity:-26.3°, maximum distance exceeded,<br>bad d_angle(sp2) | N [ ] ... O [ ]    |
| 3GR4A  | <a href="#">CYS358(CA)</a> | 4.14     | <a href="#">GLY46(N)</a>   | 3GR4A  |                                                                                                                       | C [ ] ... N [ ]    |
| 3GR4A  | <a href="#">CYS358(CA)</a> | 4.43     | <a href="#">GLY46(CA)</a>  | 3GR4A  |                                                                                                                       | C [ ] ... C [ ]    |
| 3GR4A  | <a href="#">CYS358(CA)</a> | 4.11     | <a href="#">GLY46(C)</a>   | 3GR4A  |                                                                                                                       | C [ ] ... C [ ]    |
| 3GR4A  | <a href="#">CYS358(CA)</a> | 3.19     | <a href="#">GLY46(O)</a>   | 3GR4A  |                                                                                                                       | C [ ] ... O [ ]    |
| 3GR4A  | <a href="#">CYS358(C)</a>  | 4.68     | <a href="#">GLY46(C)</a>   | 3GR4A  |                                                                                                                       |                    |
| 3GR4A  | <a href="#">CYS358(C)</a>  | 3.53     | <a href="#">GLY46(O)</a>   | 3GR4A  |                                                                                                                       | C [ ] ... O [ ]    |
| 3GR4A  | <a href="#">CYS358(O)</a>  | 4.74     | <a href="#">GLY46(O)</a>   | 3GR4A  |                                                                                                                       |                    |
| 3GR4A  | <a href="#">CYS358(CB)</a> | 4.63     | <a href="#">GLY46(N)</a>   | 3GR4A  |                                                                                                                       |                    |
| 3GR4A  | <a href="#">CYS358(CB)</a> | 4.47     | <a href="#">GLY46(CA)</a>  | 3GR4A  |                                                                                                                       | C [ ] ... C [ ]    |
| 3GR4A  | <a href="#">CYS358(CB)</a> | 4.10     | <a href="#">GLY46(C)</a>   | 3GR4A  |                                                                                                                       | C [ ] ... C [ ]    |
| 3GR4A  | <a href="#">CYS358(CB)</a> | 3.41     | <a href="#">GLY46(O)</a>   | 3GR4A  |                                                                                                                       | C [ ] ... O [ ]    |

|       |                            |      |                             |       |                                                                                                                                        |               |
|-------|----------------------------|------|-----------------------------|-------|----------------------------------------------------------------------------------------------------------------------------------------|---------------|
| 3GR4A | <a href="#">CYS358(SG)</a> | 4.32 | <a href="#">GLY46(N)</a>    | 3GR4A | [D-A-AA]:88.0° [A-D-DD]:68.3° d_planarity:-27.0°,<br>maximum distance exceeded, bad d_angle(sp2)                                       | S[ ] ... N[ ] |
| 3GR4A | <a href="#">CYS358(SG)</a> | 4.02 | <a href="#">GLY46(CA)</a>   | 3GR4A |                                                                                                                                        | S[ ] ... C[ ] |
| 3GR4A | <a href="#">CYS358(SG)</a> | 4.19 | <a href="#">GLY46(C)</a>    | 3GR4A |                                                                                                                                        | S[ ] ... C[ ] |
| 3GR4A | <a href="#">CYS358(SG)</a> | 4.00 | <a href="#">GLY46(O)</a>    | 3GR4A |                                                                                                                                        | S[ ] ... O[ ] |
| 3GR4A | <a href="#">CYS358(CB)</a> | 4.22 | <a href="#">ILE48(CG1)</a>  | 3GR4A |                                                                                                                                        | C[ ] ... C[ ] |
| 3GR4A | <a href="#">CYS358(CB)</a> | 3.81 | <a href="#">ILE48(CD1)</a>  | 3GR4A |                                                                                                                                        | C[ ] ... C[ ] |
| 3GR4A | <a href="#">CYS358(SG)</a> | 4.47 | <a href="#">ILE48(CG1)</a>  | 3GR4A |                                                                                                                                        | S[ ] ... C[ ] |
| 3GR4A | <a href="#">CYS358(SG)</a> | 4.15 | <a href="#">ILE48(CD1)</a>  | 3GR4A |                                                                                                                                        | S[ ] ... C[ ] |
| 3GR4A | <a href="#">CYS358(N)</a>  | 4.33 | <a href="#">VAL324(C)</a>   | 3GR4A |                                                                                                                                        | N[ ] ... C[ ] |
| 3GR4A | <a href="#">CYS358(N)</a>  | 3.20 | <a href="#">VAL324(O)</a>   | 3GR4A | <b>H-bond</b> [D-A-AA]:150.5° [A-D-DD]:124.8° d_planarity:-<br>13.6° a_planarity:44.4°                                                 | N[ ] ... O[ ] |
| 3GR4A | <a href="#">CYS358(CA)</a> | 4.22 | <a href="#">VAL324(O)</a>   | 3GR4A |                                                                                                                                        | C[ ] ... O[ ] |
| 3GR4A | <a href="#">CYS358(C)</a>  | 4.48 | <a href="#">VAL324(O)</a>   | 3GR4A |                                                                                                                                        | C[ ] ... O[ ] |
| 3GR4A | <a href="#">CYS358(O)</a>  | 4.58 | <a href="#">VAL324(C)</a>   | 3GR4A |                                                                                                                                        |               |
| 3GR4A | <a href="#">CYS358(O)</a>  | 3.84 | <a href="#">VAL324(O)</a>   | 3GR4A |                                                                                                                                        | O[ ] ... O[ ] |
| 3GR4A | <a href="#">CYS358(CB)</a> | 4.49 | <a href="#">VAL324(O)</a>   | 3GR4A |                                                                                                                                        | C[ ] ... O[ ] |
| 3GR4A | <a href="#">CYS358(N)</a>  | 4.90 | <a href="#">ILE325(N)</a>   | 3GR4A |                                                                                                                                        |               |
| 3GR4A | <a href="#">CYS358(N)</a>  | 4.56 | <a href="#">ILE325(CA)</a>  | 3GR4A |                                                                                                                                        |               |
| 3GR4A | <a href="#">CYS358(CA)</a> | 4.71 | <a href="#">ILE325(CA)</a>  | 3GR4A |                                                                                                                                        |               |
| 3GR4A | <a href="#">CYS358(C)</a>  | 4.31 | <a href="#">ILE325(CA)</a>  | 3GR4A |                                                                                                                                        | C[ ] ... C[ ] |
| 3GR4A | <a href="#">CYS358(C)</a>  | 4.83 | <a href="#">ILE325(C)</a>   | 3GR4A |                                                                                                                                        |               |
| 3GR4A | <a href="#">CYS358(C)</a>  | 4.88 | <a href="#">ILE325(CB)</a>  | 3GR4A |                                                                                                                                        |               |
| 3GR4A | <a href="#">CYS358(C)</a>  | 4.50 | <a href="#">ILE325(CG2)</a> | 3GR4A |                                                                                                                                        |               |
| 3GR4A | <a href="#">CYS358(O)</a>  | 4.48 | <a href="#">ILE325(N)</a>   | 3GR4A | [D-A-AA]:127.3° [A-D-DD]:38.8° d_planarity:8.3°<br>a_planarity:-37.3°, maximum distance exceeded,<br>bad d_angle(sp2)                  | O[ ] ... N[ ] |
| 3GR4A | <a href="#">CYS358(O)</a>  | 3.46 | <a href="#">ILE325(CA)</a>  | 3GR4A |                                                                                                                                        | O[ ] ... C[ ] |
| 3GR4A | <a href="#">CYS358(O)</a>  | 3.77 | <a href="#">ILE325(C)</a>   | 3GR4A |                                                                                                                                        | O[ ] ... C[ ] |
| 3GR4A | <a href="#">CYS358(O)</a>  | 4.98 | <a href="#">ILE325(O)</a>   | 3GR4A |                                                                                                                                        |               |
| 3GR4A | <a href="#">CYS358(O)</a>  | 4.29 | <a href="#">ILE325(CB)</a>  | 3GR4A |                                                                                                                                        | O[ ] ... C[ ] |
| 3GR4A | <a href="#">CYS358(O)</a>  | 4.83 | <a href="#">ILE325(CG1)</a> | 3GR4A |                                                                                                                                        |               |
| 3GR4A | <a href="#">CYS358(O)</a>  | 4.06 | <a href="#">ILE325(CG2)</a> | 3GR4A |                                                                                                                                        | O[ ] ... C[ ] |
| 3GR4A | <a href="#">CYS358(CB)</a> | 4.47 | <a href="#">ILE325(CA)</a>  | 3GR4A |                                                                                                                                        | C[ ] ... C[ ] |
| 3GR4A | <a href="#">CYS358(CB)</a> | 4.51 | <a href="#">ILE325(CB)</a>  | 3GR4A |                                                                                                                                        |               |
| 3GR4A | <a href="#">CYS358(CB)</a> | 4.04 | <a href="#">ILE325(CG1)</a> | 3GR4A |                                                                                                                                        | C[ ] ... C[ ] |
| 3GR4A | <a href="#">CYS358(CB)</a> | 4.40 | <a href="#">ILE325(CG2)</a> | 3GR4A |                                                                                                                                        | C[ ] ... C[ ] |
| 3GR4A | <a href="#">CYS358(SG)</a> | 4.66 | <a href="#">ILE325(CG1)</a> | 3GR4A |                                                                                                                                        |               |
| 3GR4A | <a href="#">CYS358(C)</a>  | 4.22 | <a href="#">CYS326(N)</a>   | 3GR4A |                                                                                                                                        | C[ ] ... N[ ] |
| 3GR4A | <a href="#">CYS358(C)</a>  | 4.72 | <a href="#">CYS326(O)</a>   | 3GR4A |                                                                                                                                        |               |
| 3GR4A | <a href="#">CYS358(O)</a>  | 3.08 | <a href="#">CYS326(N)</a>   | 3GR4A | <b>H-bond</b> [D-A-AA]:155.2° [A-D-DD]:126.6° d_planarity:-<br>10.0° a_planarity:65.0°                                                 | O[ ] ... N[ ] |
| 3GR4A | <a href="#">CYS358(O)</a>  | 4.13 | <a href="#">CYS326(CA)</a>  | 3GR4A |                                                                                                                                        | O[ ] ... C[ ] |
| 3GR4A | <a href="#">CYS358(O)</a>  | 4.55 | <a href="#">CYS326(C)</a>   | 3GR4A |                                                                                                                                        |               |
| 3GR4A | <a href="#">CYS358(O)</a>  | 4.04 | <a href="#">CYS326(O)</a>   | 3GR4A |                                                                                                                                        | O[ ] ... O[ ] |
| 3GR4A | <a href="#">CYS358(O)</a>  | 4.26 | <a href="#">CYS326(CB)</a>  | 3GR4A |                                                                                                                                        | O[ ] ... C[ ] |
| 3GR4A | <a href="#">CYS358(N)</a>  | 4.37 | <a href="#">ALA356(CA)</a>  | 3GR4A |                                                                                                                                        | N[ ] ... C[ ] |
| 3GR4A | <a href="#">CYS358(N)</a>  | 3.34 | <a href="#">ALA356(C)</a>   | 3GR4A |                                                                                                                                        | N[ ] ... C[ ] |
| 3GR4A | <a href="#">CYS358(N)</a>  | 3.60 | <a href="#">ALA356(O)</a>   | 3GR4A | [D-A-AA]:68.0° [A-D-DD]:127.0° d_planarity:70.8°<br>a_planarity:47.9°, maximum distance exceeded,<br>bad a_angle(sp2), bad d_planarity | N[ ] ... O[ ] |



|       |                            |      |                             |       |                                                                                                                      |               |
|-------|----------------------------|------|-----------------------------|-------|----------------------------------------------------------------------------------------------------------------------|---------------|
| 3GR4A | <a href="#">CYS358(N)</a>  | 4.35 | <a href="#">ALA356(CB)</a>  | 3GR4A |                                                                                                                      | N[ ] ... C[ ] |
| 3GR4A | <a href="#">CYS358(CA)</a> | 4.57 | <a href="#">ALA356(C)</a>   | 3GR4A |                                                                                                                      |               |
| 3GR4A | <a href="#">CYS358(CA)</a> | 4.65 | <a href="#">ALA356(O)</a>   | 3GR4A |                                                                                                                      |               |
| 3GR4A | <a href="#">CYS358(C)</a>  | 4.82 | <a href="#">ALA356(C)</a>   | 3GR4A |                                                                                                                      |               |
| 3GR4A | <a href="#">CYS358(C)</a>  | 4.94 | <a href="#">ALA356(O)</a>   | 3GR4A |                                                                                                                      |               |
| 3GR4A | <a href="#">CYS358(C)</a>  | 4.59 | <a href="#">ALA356(CB)</a>  | 3GR4A |                                                                                                                      |               |
| 3GR4A | <a href="#">CYS358(O)</a>  | 4.71 | <a href="#">ALA356(CA)</a>  | 3GR4A |                                                                                                                      |               |
| 3GR4A | <a href="#">CYS358(O)</a>  | 4.49 | <a href="#">ALA356(C)</a>   | 3GR4A |                                                                                                                      | O[ ] ... C[ ] |
| 3GR4A | <a href="#">CYS358(O)</a>  | 4.86 | <a href="#">ALA356(O)</a>   | 3GR4A |                                                                                                                      |               |
| 3GR4A | <a href="#">CYS358(O)</a>  | 3.77 | <a href="#">ALA356(CB)</a>  | 3GR4A |                                                                                                                      | O[ ] ... C[ ] |
| 3GR4A | <a href="#">CYS358(N)</a>  | 2.79 | <a href="#">ASP357(N)</a>   | 3GR4A |                                                                                                                      | N[ ] ... N[ ] |
| 3GR4A | <a href="#">CYS358(N)</a>  | 2.41 | <a href="#">ASP357(CA)</a>  | 3GR4A |                                                                                                                      | N[ ] ... C[ ] |
| 3GR4A | <a href="#">CYS358(N)</a>  | 2.27 | <a href="#">ASP357(O)</a>   | 3GR4A | [D-A-AA]:28.5° [A-D-DD]:96.4° d_planarity:1.2°<br>a_planarity:2.7°, bad a_angle(sp2)                                 | N[ ] ... O[ ] |
| 3GR4A | <a href="#">CYS358(N)</a>  | 3.10 | <a href="#">ASP357(CB)</a>  | 3GR4A |                                                                                                                      | N[ ] ... C[ ] |
| 3GR4A | <a href="#">CYS358(N)</a>  | 4.50 | <a href="#">ASP357(CG)</a>  | 3GR4A |                                                                                                                      |               |
| 3GR4A | <a href="#">CYS358(CA)</a> | 4.21 | <a href="#">ASP357(N)</a>   | 3GR4A |                                                                                                                      | C[ ] ... N[ ] |
| 3GR4A | <a href="#">CYS358(CA)</a> | 3.82 | <a href="#">ASP357(CA)</a>  | 3GR4A |                                                                                                                      | C[ ] ... C[ ] |
| 3GR4A | <a href="#">CYS358(CA)</a> | 2.46 | <a href="#">ASP357(C)</a>   | 3GR4A |                                                                                                                      | C[ ] ... C[ ] |
| 3GR4A | <a href="#">CYS358(CA)</a> | 2.84 | <a href="#">ASP357(O)</a>   | 3GR4A |                                                                                                                      | C[ ] ... O[ ] |
| 3GR4A | <a href="#">CYS358(CA)</a> | 4.44 | <a href="#">ASP357(CB)</a>  | 3GR4A |                                                                                                                      | C[ ] ... C[ ] |
| 3GR4A | <a href="#">CYS358(C)</a>  | 4.76 | <a href="#">ASP357(N)</a>   | 3GR4A |                                                                                                                      |               |
| 3GR4A | <a href="#">CYS358(C)</a>  | 4.77 | <a href="#">ASP357(CA)</a>  | 3GR4A |                                                                                                                      |               |
| 3GR4A | <a href="#">CYS358(C)</a>  | 3.59 | <a href="#">ASP357(C)</a>   | 3GR4A |                                                                                                                      | C[ ] ... C[ ] |
| 3GR4A | <a href="#">CYS358(C)</a>  | 4.08 | <a href="#">ASP357(O)</a>   | 3GR4A |                                                                                                                      | C[ ] ... O[ ] |
| 3GR4A | <a href="#">CYS358(O)</a>  | 4.49 | <a href="#">ASP357(N)</a>   | 3GR4A | [D-A-AA]:95.3° [A-D-DD]:95.7° d_planarity:83.8°<br>a_planarity:-31.8°, maximum distance exceeded,<br>bad d_planarity | O[ ] ... N[ ] |
| 3GR4A | <a href="#">CYS358(O)</a>  | 4.85 | <a href="#">ASP357(CA)</a>  | 3GR4A |                                                                                                                      |               |
| 3GR4A | <a href="#">CYS358(O)</a>  | 3.99 | <a href="#">ASP357(C)</a>   | 3GR4A |                                                                                                                      | O[ ] ... C[ ] |
| 3GR4A | <a href="#">CYS358(O)</a>  | 4.75 | <a href="#">ASP357(O)</a>   | 3GR4A |                                                                                                                      |               |
| 3GR4A | <a href="#">CYS358(CB)</a> | 4.68 | <a href="#">ASP357(CA)</a>  | 3GR4A |                                                                                                                      |               |
| 3GR4A | <a href="#">CYS358(CB)</a> | 3.44 | <a href="#">ASP357(C)</a>   | 3GR4A |                                                                                                                      | C[ ] ... C[ ] |
| 3GR4A | <a href="#">CYS358(CB)</a> | 3.76 | <a href="#">ASP357(O)</a>   | 3GR4A |                                                                                                                      | C[ ] ... O[ ] |
| 3GR4A | <a href="#">CYS358(CB)</a> | 4.85 | <a href="#">ASP357(CB)</a>  | 3GR4A |                                                                                                                      |               |
| 3GR4A | <a href="#">CYS358(SG)</a> | 4.77 | <a href="#">ASP357(CA)</a>  | 3GR4A |                                                                                                                      |               |
| 3GR4A | <a href="#">CYS358(SG)</a> | 3.65 | <a href="#">ASP357(C)</a>   | 3GR4A |                                                                                                                      | S[ ] ... C[ ] |
| 3GR4A | <a href="#">CYS358(SG)</a> | 3.66 | <a href="#">ASP357(O)</a>   | 3GR4A | Weakly negative                                                                                                      | S[ ] ... O[ ] |
| 3GR4A | <a href="#">CYS358(SG)</a> | 4.53 | <a href="#">ASP357(CB)</a>  | 3GR4A |                                                                                                                      |               |
| 3GR4A | <a href="#">CYS358(N)</a>  | 3.62 | <a href="#">ILE359(N)</a>   | 3GR4A |                                                                                                                      | N[ ] ... N[ ] |
| 3GR4A | <a href="#">CYS358(N)</a>  | 4.87 | <a href="#">ILE359(CA)</a>  | 3GR4A |                                                                                                                      |               |
| 3GR4A | <a href="#">CYS358(CA)</a> | 2.37 | <a href="#">ILE359(N)</a>   | 3GR4A |                                                                                                                      | C[ ] ... N[ ] |
| 3GR4A | <a href="#">CYS358(CA)</a> | 3.74 | <a href="#">ILE359(CA)</a>  | 3GR4A |                                                                                                                      | C[ ] ... C[ ] |
| 3GR4A | <a href="#">CYS358(CA)</a> | 4.60 | <a href="#">ILE359(C)</a>   | 3GR4A |                                                                                                                      |               |
| 3GR4A | <a href="#">CYS358(CA)</a> | 4.53 | <a href="#">ILE359(O)</a>   | 3GR4A |                                                                                                                      |               |
| 3GR4A | <a href="#">CYS358(CA)</a> | 4.69 | <a href="#">ILE359(CB)</a>  | 3GR4A |                                                                                                                      |               |
| 3GR4A | <a href="#">CYS358(CA)</a> | 4.96 | <a href="#">ILE359(CG1)</a> | 3GR4A |                                                                                                                      |               |
| 3GR4A | <a href="#">CYS358(CA)</a> | 4.77 | <a href="#">ILE359(CG2)</a> | 3GR4A |                                                                                                                      |               |
| 3GR4A | <a href="#">CYS358(C)</a>  | 2.43 | <a href="#">ILE359(CA)</a>  | 3GR4A |                                                                                                                      | C[ ] ... C[ ] |
| 3GR4A | <a href="#">CYS358(C)</a>  | 3.51 | <a href="#">ILE359(C)</a>   | 3GR4A |                                                                                                                      | C[ ] ... C[ ] |

|       |                             |      |                              |       |                                                                                                                        |               |
|-------|-----------------------------|------|------------------------------|-------|------------------------------------------------------------------------------------------------------------------------|---------------|
| 3GR4A | <a href="#">CYS358</a> (C)  | 3.78 | <a href="#">ILE359</a> (O)   | 3GR4A |                                                                                                                        | C[ ] ... O[ ] |
| 3GR4A | <a href="#">CYS358</a> (C)  | 3.46 | <a href="#">ILE359</a> (CB)  | 3GR4A |                                                                                                                        | C[ ] ... C[ ] |
| 3GR4A | <a href="#">CYS358</a> (C)  | 4.08 | <a href="#">ILE359</a> (CG1) | 3GR4A |                                                                                                                        | C[ ] ... C[ ] |
| 3GR4A | <a href="#">CYS358</a> (C)  | 3.56 | <a href="#">ILE359</a> (CG2) | 3GR4A |                                                                                                                        | C[ ] ... C[ ] |
| 3GR4A | <a href="#">CYS358</a> (O)  | 2.25 | <a href="#">ILE359</a> (N)   | 3GR4A | [D-A-AA]:29.6° [A-D-DD]:94.8° d_planarity:1.0°<br>a_planarity:5.4°, bad a_angle(sp2)                                   | O[ ] ... N[ ] |
| 3GR4A | <a href="#">CYS358</a> (O)  | 2.77 | <a href="#">ILE359</a> (CA)  | 3GR4A |                                                                                                                        | O[ ] ... C[ ] |
| 3GR4A | <a href="#">CYS358</a> (O)  | 3.94 | <a href="#">ILE359</a> (C)   | 3GR4A |                                                                                                                        | O[ ] ... C[ ] |
| 3GR4A | <a href="#">CYS358</a> (O)  | 4.49 | <a href="#">ILE359</a> (O)   | 3GR4A |                                                                                                                        | O[ ] ... O[ ] |
| 3GR4A | <a href="#">CYS358</a> (O)  | 3.79 | <a href="#">ILE359</a> (CB)  | 3GR4A |                                                                                                                        | O[ ] ... C[ ] |
| 3GR4A | <a href="#">CYS358</a> (O)  | 4.76 | <a href="#">ILE359</a> (CG1) | 3GR4A |                                                                                                                        |               |
| 3GR4A | <a href="#">CYS358</a> (O)  | 3.59 | <a href="#">ILE359</a> (CG2) | 3GR4A |                                                                                                                        | O[ ] ... C[ ] |
| 3GR4A | <a href="#">CYS358</a> (CB) | 3.01 | <a href="#">ILE359</a> (N)   | 3GR4A |                                                                                                                        | C[ ] ... N[ ] |
| 3GR4A | <a href="#">CYS358</a> (CB) | 4.24 | <a href="#">ILE359</a> (CA)  | 3GR4A |                                                                                                                        | C[ ] ... C[ ] |
| 3GR4A | <a href="#">CYS358</a> (CB) | 4.63 | <a href="#">ILE359</a> (C)   | 3GR4A |                                                                                                                        |               |
| 3GR4A | <a href="#">CYS358</a> (CB) | 4.32 | <a href="#">ILE359</a> (O)   | 3GR4A |                                                                                                                        | C[ ] ... O[ ] |
| 3GR4A | <a href="#">CYS358</a> (SG) | 4.63 | <a href="#">ILE359</a> (N)   | 3GR4A | [D-A-AA]:20.6° [A-D-DD]:151.3° d_planarity:79.7°,<br>maximum distance exceeded, bad a_angle(sp3),<br>bad d_planarity   |               |
| 3GR4A | <a href="#">CYS358</a> (C)  | 4.55 | <a href="#">MET360</a> (N)   | 3GR4A |                                                                                                                        |               |
| 3GR4A | <a href="#">CYS358</a> (O)  | 4.72 | <a href="#">MET360</a> (N)   | 3GR4A | [D-A-AA]:74.7° [A-D-DD]:138.3° d_planarity:57.9°<br>a_planarity:27.6°, maximum distance exceeded,<br>bad a_angle(sp2)  |               |
| 3GR4A | <a href="#">CYS358</a> (SG) | 4.42 | <a href="#">HIS464</a> (C)   | 3GR4A |                                                                                                                        | S[ ] ... C[ ] |
| 3GR4A | <a href="#">CYS358</a> (SG) | 3.50 | <a href="#">HIS464</a> (O)   | 3GR4A |                                                                                                                        | S[ ] ... O[ ] |
| 3GR4A | <a href="#">CYS358</a> (N)  | 4.76 | <a href="#">LEU465</a> (O)   | 3GR4A | [D-A-AA]:127.0° [A-D-DD]:110.3° d_planarity:73.2°<br>a_planarity:-85.4°, maximum distance exceeded,<br>bad d_planarity |               |
| 3GR4A | <a href="#">CYS358</a> (SG) | 4.61 | <a href="#">LEU465</a> (N)   | 3GR4A | [D-A-AA]:172.8° [A-D-DD]:50.1° d_planarity:24.5°,<br>maximum distance exceeded, bad d_angle(sp2)                       |               |
| 3GR4A | <a href="#">CYS358</a> (SG) | 3.84 | <a href="#">LEU465</a> (CA)  | 3GR4A |                                                                                                                        | S[ ] ... C[ ] |
| 3GR4A | <a href="#">CYS358</a> (SG) | 3.95 | <a href="#">LEU465</a> (C)   | 3GR4A |                                                                                                                        | S[ ] ... C[ ] |
| 3GR4A | <a href="#">CYS358</a> (SG) | 3.70 | <a href="#">LEU465</a> (O)   | 3GR4A |                                                                                                                        | S[ ] ... O[ ] |
| 3GR4A | <a href="#">CYS358</a> (SG) | 4.85 | <a href="#">LEU465</a> (CB)  | 3GR4A |                                                                                                                        |               |
| 3GR4A | <a href="#">CYS358</a> (SG) | 4.45 | <a href="#">LEU465</a> (CD2) | 3GR4A |                                                                                                                        | S[ ] ... C[ ] |
| 3GR4A | <a href="#">CYS358</a> (SG) | 4.90 | <a href="#">TYR466</a> (N)   | 3GR4A | [D-A-AA]:148.4° [A-D-DD]:118.6° d_planarity:45.2°,<br>maximum distance exceeded                                        |               |

| chain1 | res1/atm1                  | distance | res2/atm2                  | chain2 | H-bonding                                                                                                              | Charge interaction |
|--------|----------------------------|----------|----------------------------|--------|------------------------------------------------------------------------------------------------------------------------|--------------------|
| 1WYIA  | <a href="#">CYS41</a> (N)  | 4.42     | <a href="#">GLY10</a> (N)  | 1WYIA  |                                                                                                                        | N[ ] ... N[ ]      |
| 1WYIA  | <a href="#">CYS41</a> (N)  | 4.73     | <a href="#">GLY10</a> (O)  | 1WYIA  | [D-A-AA]:113.6° [A-D-DD]:34.9° d_planarity:27.3°<br>a_planarity:-36.2°, maximum distance exceeded,<br>bad d_angle(sp2) |                    |
| 1WYIA  | <a href="#">CYS41</a> (CA) | 4.19     | <a href="#">GLY10</a> (N)  | 1WYIA  |                                                                                                                        | C[ ] ... N[ ]      |
| 1WYIA  | <a href="#">CYS41</a> (CA) | 4.52     | <a href="#">GLY10</a> (CA) | 1WYIA  |                                                                                                                        |                    |
| 1WYIA  | <a href="#">CYS41</a> (CA) | 4.46     | <a href="#">GLY10</a> (C)  | 1WYIA  |                                                                                                                        | C[ ] ... C[ ]      |
| 1WYIA  | <a href="#">CYS41</a> (CA) | 3.64     | <a href="#">GLY10</a> (O)  | 1WYIA  |                                                                                                                        | C[ ] ... O[ ]      |
| 1WYIA  | <a href="#">CYS41</a> (C)  | 4.92     | <a href="#">GLY10</a> (N)  | 1WYIA  |                                                                                                                        |                    |

|       |                            |      |                             |       |                                                                                                                                        |               |
|-------|----------------------------|------|-----------------------------|-------|----------------------------------------------------------------------------------------------------------------------------------------|---------------|
| 1WYIA | <a href="#">CYS41</a> (C)  | 4.68 | <a href="#">GLY10</a> (C)   | 1WYIA |                                                                                                                                        |               |
| 1WYIA | <a href="#">CYS41</a> (C)  | 3.66 | <a href="#">GLY10</a> (O)   | 1WYIA |                                                                                                                                        | C[ ] ... O[ ] |
| 1WYIA | <a href="#">CYS41</a> (O)  | 4.85 | <a href="#">GLY10</a> (O)   | 1WYIA |                                                                                                                                        |               |
| 1WYIA | <a href="#">CYS41</a> (CB) | 4.42 | <a href="#">GLY10</a> (O)   | 1WYIA |                                                                                                                                        | C[ ] ... O[ ] |
| 1WYIA | <a href="#">CYS41</a> (CA) | 4.65 | <a href="#">TRP12</a> (NE1) | 1WYIA |                                                                                                                                        |               |
| 1WYIA | <a href="#">CYS41</a> (CA) | 4.81 | <a href="#">TRP12</a> (CE2) | 1WYIA |                                                                                                                                        |               |
| 1WYIA | <a href="#">CYS41</a> (CA) | 4.84 | <a href="#">TRP12</a> (CZ2) | 1WYIA |                                                                                                                                        |               |
| 1WYIA | <a href="#">CYS41</a> (CB) | 4.99 | <a href="#">TRP12</a> (CD2) | 1WYIA |                                                                                                                                        |               |
| 1WYIA | <a href="#">CYS41</a> (CB) | 4.14 | <a href="#">TRP12</a> (NE1) | 1WYIA |                                                                                                                                        | C[ ] ... N[ ] |
| 1WYIA | <a href="#">CYS41</a> (CB) | 4.02 | <a href="#">TRP12</a> (CE2) | 1WYIA |                                                                                                                                        | C[ ] ... C[ ] |
| 1WYIA | <a href="#">CYS41</a> (CB) | 3.68 | <a href="#">TRP12</a> (CZ2) | 1WYIA |                                                                                                                                        | C[ ] ... C[ ] |
| 1WYIA | <a href="#">CYS41</a> (CB) | 4.41 | <a href="#">TRP12</a> (CH2) | 1WYIA |                                                                                                                                        | C[ ] ... C[ ] |
| 1WYIA | <a href="#">CYS41</a> (SG) | 4.32 | <a href="#">TRP12</a> (NE1) | 1WYIA | [D-A-AA]:72.0° [A-D-DD]:146.3° d_planarity:-65.1°,<br>maximum distance exceeded, bad d_planarity                                       | S[ ] ... N[ ] |
| 1WYIA | <a href="#">CYS41</a> (SG) | 4.47 | <a href="#">TRP12</a> (CE2) | 1WYIA |                                                                                                                                        | S[ ] ... C[ ] |
| 1WYIA | <a href="#">CYS41</a> (SG) | 4.00 | <a href="#">TRP12</a> (CZ2) | 1WYIA |                                                                                                                                        | S[ ] ... C[ ] |
| 1WYIA | <a href="#">CYS41</a> (SG) | 4.99 | <a href="#">TRP12</a> (CH2) | 1WYIA |                                                                                                                                        |               |
| 1WYIA | <a href="#">CYS41</a> (SG) | 3.77 | <a href="#">LEU28</a> (CD1) | 1WYIA |                                                                                                                                        | S[ ] ... C[ ] |
| 1WYIA | <a href="#">CYS41</a> (N)  | 4.50 | <a href="#">VAL39</a> (C)   | 1WYIA |                                                                                                                                        | N[ ] ... C[ ] |
| 1WYIA | <a href="#">CYS41</a> (N)  | 4.65 | <a href="#">VAL39</a> (O)   | 1WYIA | [D-A-AA]:75.3° [A-D-DD]:153.5° d_planarity:75.7°<br>a_planarity:23.9°, maximum distance exceeded,<br>bad a_angle(sp2), bad d_planarity |               |
| 1WYIA | <a href="#">CYS41</a> (SG) | 4.87 | <a href="#">VAL39</a> (CG1) | 1WYIA |                                                                                                                                        |               |
| 1WYIA | <a href="#">CYS41</a> (N)  | 3.58 | <a href="#">VAL40</a> (N)   | 1WYIA |                                                                                                                                        | N[ ] ... N[ ] |
| 1WYIA | <a href="#">CYS41</a> (N)  | 2.45 | <a href="#">VAL40</a> (CA)  | 1WYIA |                                                                                                                                        | N[ ] ... C[ ] |
| 1WYIA | <a href="#">CYS41</a> (N)  | 2.25 | <a href="#">VAL40</a> (O)   | 1WYIA | [D-A-AA]:29.9° [A-D-DD]:95.5° d_planarity:0.3°<br>a_planarity:0.7°, bad a_angle(sp2)                                                   | N[ ] ... O[ ] |
| 1WYIA | <a href="#">CYS41</a> (N)  | 3.35 | <a href="#">VAL40</a> (CB)  | 1WYIA |                                                                                                                                        | N[ ] ... C[ ] |
| 1WYIA | <a href="#">CYS41</a> (N)  | 3.34 | <a href="#">VAL40</a> (CG1) | 1WYIA |                                                                                                                                        | N[ ] ... C[ ] |
| 1WYIA | <a href="#">CYS41</a> (N)  | 4.72 | <a href="#">VAL40</a> (CG2) | 1WYIA |                                                                                                                                        |               |
| 1WYIA | <a href="#">CYS41</a> (CA) | 4.83 | <a href="#">VAL40</a> (N)   | 1WYIA |                                                                                                                                        |               |
| 1WYIA | <a href="#">CYS41</a> (CA) | 3.84 | <a href="#">VAL40</a> (CA)  | 1WYIA |                                                                                                                                        | C[ ] ... C[ ] |
| 1WYIA | <a href="#">CYS41</a> (CA) | 2.45 | <a href="#">VAL40</a> (C)   | 1WYIA |                                                                                                                                        | C[ ] ... C[ ] |
| 1WYIA | <a href="#">CYS41</a> (CA) | 2.79 | <a href="#">VAL40</a> (O)   | 1WYIA |                                                                                                                                        | C[ ] ... O[ ] |
| 1WYIA | <a href="#">CYS41</a> (CA) | 4.64 | <a href="#">VAL40</a> (CB)  | 1WYIA |                                                                                                                                        |               |
| 1WYIA | <a href="#">CYS41</a> (CA) | 4.50 | <a href="#">VAL40</a> (CG1) | 1WYIA |                                                                                                                                        |               |
| 1WYIA | <a href="#">CYS41</a> (C)  | 4.73 | <a href="#">VAL40</a> (CA)  | 1WYIA |                                                                                                                                        |               |
| 1WYIA | <a href="#">CYS41</a> (C)  | 3.50 | <a href="#">VAL40</a> (C)   | 1WYIA |                                                                                                                                        | C[ ] ... C[ ] |
| 1WYIA | <a href="#">CYS41</a> (C)  | 3.90 | <a href="#">VAL40</a> (O)   | 1WYIA |                                                                                                                                        | C[ ] ... O[ ] |
| 1WYIA | <a href="#">CYS41</a> (C)  | 4.56 | <a href="#">VAL40</a> (CG1) | 1WYIA |                                                                                                                                        |               |
| 1WYIA | <a href="#">CYS41</a> (O)  | 5.00 | <a href="#">VAL40</a> (CA)  | 1WYIA |                                                                                                                                        |               |
| 1WYIA | <a href="#">CYS41</a> (O)  | 4.06 | <a href="#">VAL40</a> (C)   | 1WYIA |                                                                                                                                        | O[ ] ... C[ ] |
| 1WYIA | <a href="#">CYS41</a> (O)  | 4.73 | <a href="#">VAL40</a> (O)   | 1WYIA |                                                                                                                                        |               |
| 1WYIA | <a href="#">CYS41</a> (O)  | 4.43 | <a href="#">VAL40</a> (CG1) | 1WYIA |                                                                                                                                        | O[ ] ... C[ ] |
| 1WYIA | <a href="#">CYS41</a> (CB) | 4.71 | <a href="#">VAL40</a> (CA)  | 1WYIA |                                                                                                                                        |               |
| 1WYIA | <a href="#">CYS41</a> (CB) | 3.48 | <a href="#">VAL40</a> (C)   | 1WYIA |                                                                                                                                        | C[ ] ... C[ ] |
| 1WYIA | <a href="#">CYS41</a> (CB) | 3.86 | <a href="#">VAL40</a> (O)   | 1WYIA |                                                                                                                                        | C[ ] ... O[ ] |
| 1WYIA | <a href="#">CYS41</a> (SG) | 4.79 | <a href="#">VAL40</a> (CA)  | 1WYIA |                                                                                                                                        |               |
| 1WYIA | <a href="#">CYS41</a> (SG) | 3.72 | <a href="#">VAL40</a> (C)   | 1WYIA |                                                                                                                                        | S[ ] ... C[ ] |
| 1WYIA | <a href="#">CYS41</a> (SG) | 3.86 | <a href="#">VAL40</a> (O)   | 1WYIA |                                                                                                                                        | S[ ] ... O[ ] |

|       |                           |      |                            |       |                                                                                                                        |               |
|-------|---------------------------|------|----------------------------|-------|------------------------------------------------------------------------------------------------------------------------|---------------|
| 1WYIA | <a href="#">CYS41(N)</a>  | 3.49 | <a href="#">ALA42(N)</a>   | 1WYIA |                                                                                                                        | N[ ] ... N[ ] |
| 1WYIA | <a href="#">CYS41(N)</a>  | 4.74 | <a href="#">ALA42(CA)</a>  | 1WYIA |                                                                                                                        |               |
| 1WYIA | <a href="#">CYS41(CA)</a> | 2.44 | <a href="#">ALA42(N)</a>   | 1WYIA |                                                                                                                        | C[ ] ... N[ ] |
| 1WYIA | <a href="#">CYS41(CA)</a> | 3.82 | <a href="#">ALA42(CA)</a>  | 1WYIA |                                                                                                                        | C[ ] ... C[ ] |
| 1WYIA | <a href="#">CYS41(CA)</a> | 4.66 | <a href="#">ALA42(C)</a>   | 1WYIA |                                                                                                                        |               |
| 1WYIA | <a href="#">CYS41(CA)</a> | 4.77 | <a href="#">ALA42(CB)</a>  | 1WYIA |                                                                                                                        |               |
| 1WYIA | <a href="#">CYS41(C)</a>  | 2.43 | <a href="#">ALA42(CA)</a>  | 1WYIA |                                                                                                                        | C[ ] ... C[ ] |
| 1WYIA | <a href="#">CYS41(C)</a>  | 3.39 | <a href="#">ALA42(C)</a>   | 1WYIA |                                                                                                                        | C[ ] ... C[ ] |
| 1WYIA | <a href="#">CYS41(C)</a>  | 4.27 | <a href="#">ALA42(O)</a>   | 1WYIA |                                                                                                                        | C[ ] ... O[ ] |
| 1WYIA | <a href="#">CYS41(C)</a>  | 3.56 | <a href="#">ALA42(CB)</a>  | 1WYIA |                                                                                                                        | C[ ] ... C[ ] |
| 1WYIA | <a href="#">CYS41(O)</a>  | 2.25 | <a href="#">ALA42(N)</a>   | 1WYIA | [D-A-AA]:30.0° [A-D-DD]:93.5° d_planarity:0.1°<br>a_planarity:0.6°, bad a_angle(sp2)                                   | O[ ] ... N[ ] |
| 1WYIA | <a href="#">CYS41(O)</a>  | 2.76 | <a href="#">ALA42(CA)</a>  | 1WYIA |                                                                                                                        | O[ ] ... C[ ] |
| 1WYIA | <a href="#">CYS41(O)</a>  | 3.68 | <a href="#">ALA42(C)</a>   | 1WYIA |                                                                                                                        | O[ ] ... C[ ] |
| 1WYIA | <a href="#">CYS41(O)</a>  | 4.77 | <a href="#">ALA42(O)</a>   | 1WYIA |                                                                                                                        |               |
| 1WYIA | <a href="#">CYS41(O)</a>  | 3.98 | <a href="#">ALA42(CB)</a>  | 1WYIA |                                                                                                                        | O[ ] ... C[ ] |
| 1WYIA | <a href="#">CYS41(CB)</a> | 3.45 | <a href="#">ALA42(N)</a>   | 1WYIA |                                                                                                                        | C[ ] ... N[ ] |
| 1WYIA | <a href="#">CYS41(CB)</a> | 4.72 | <a href="#">ALA42(CA)</a>  | 1WYIA |                                                                                                                        |               |
| 1WYIA | <a href="#">CYS41(SG)</a> | 4.97 | <a href="#">ALA42(N)</a>   | 1WYIA | [D-A-AA]:26.9° [A-D-DD]:157.8° d_planarity:50.6°,<br>maximum distance exceeded, bad a_angle(sp3)                       |               |
| 1WYIA | <a href="#">CYS41(CA)</a> | 4.64 | <a href="#">PRO43(CD)</a>  | 1WYIA |                                                                                                                        |               |
| 1WYIA | <a href="#">CYS41(C)</a>  | 3.76 | <a href="#">PRO43(N)</a>   | 1WYIA |                                                                                                                        | C[ ] ... N[ ] |
| 1WYIA | <a href="#">CYS41(C)</a>  | 4.29 | <a href="#">PRO43(CG)</a>  | 1WYIA |                                                                                                                        | C[ ] ... C[ ] |
| 1WYIA | <a href="#">CYS41(C)</a>  | 3.37 | <a href="#">PRO43(CD)</a>  | 1WYIA |                                                                                                                        | C[ ] ... C[ ] |
| 1WYIA | <a href="#">CYS41(O)</a>  | 3.72 | <a href="#">PRO43(N)</a>   | 1WYIA |                                                                                                                        | O[ ] ... N[ ] |
| 1WYIA | <a href="#">CYS41(O)</a>  | 3.91 | <a href="#">PRO43(CG)</a>  | 1WYIA |                                                                                                                        | O[ ] ... C[ ] |
| 1WYIA | <a href="#">CYS41(O)</a>  | 2.92 | <a href="#">PRO43(CD)</a>  | 1WYIA |                                                                                                                        | O[ ] ... C[ ] |
| 1WYIA | <a href="#">CYS41(CB)</a> | 4.83 | <a href="#">PRO43(CG)</a>  | 1WYIA |                                                                                                                        |               |
| 1WYIA | <a href="#">CYS41(CB)</a> | 4.69 | <a href="#">PRO43(CD)</a>  | 1WYIA |                                                                                                                        |               |
| 1WYIA | <a href="#">CYS41(CB)</a> | 4.61 | <a href="#">LEU55(CD2)</a> | 1WYIA |                                                                                                                        |               |
| 1WYIA | <a href="#">CYS41(N)</a>  | 4.35 | <a href="#">ILE59(CG2)</a> | 1WYIA |                                                                                                                        | N[ ] ... C[ ] |
| 1WYIA | <a href="#">CYS41(CB)</a> | 4.59 | <a href="#">ILE59(CG2)</a> | 1WYIA |                                                                                                                        |               |
| 1WYIA | <a href="#">CYS41(SG)</a> | 3.89 | <a href="#">ILE59(CG2)</a> | 1WYIA |                                                                                                                        | S[ ] ... C[ ] |
| 1WYIA | <a href="#">CYS41(N)</a>  | 4.21 | <a href="#">ALA60(C)</a>   | 1WYIA |                                                                                                                        | N[ ] ... C[ ] |
| 1WYIA | <a href="#">CYS41(N)</a>  | 3.04 | <a href="#">ALA60(O)</a>   | 1WYIA | <b>H-bond</b> [D-A-AA]:158.4° [A-D-DD]:124.7° d_planarity:-8.5°<br>a_planarity:66.2°                                   | N[ ] ... O[ ] |
| 1WYIA | <a href="#">CYS41(CA)</a> | 4.05 | <a href="#">ALA60(O)</a>   | 1WYIA |                                                                                                                        | C[ ] ... O[ ] |
| 1WYIA | <a href="#">CYS41(C)</a>  | 4.41 | <a href="#">ALA60(O)</a>   | 1WYIA |                                                                                                                        | C[ ] ... O[ ] |
| 1WYIA | <a href="#">CYS41(O)</a>  | 4.64 | <a href="#">ALA60(C)</a>   | 1WYIA |                                                                                                                        |               |
| 1WYIA | <a href="#">CYS41(O)</a>  | 3.87 | <a href="#">ALA60(O)</a>   | 1WYIA |                                                                                                                        | O[ ] ... O[ ] |
| 1WYIA | <a href="#">CYS41(CB)</a> | 4.21 | <a href="#">ALA60(O)</a>   | 1WYIA |                                                                                                                        | C[ ] ... O[ ] |
| 1WYIA | <a href="#">CYS41(SG)</a> | 4.92 | <a href="#">ALA60(O)</a>   | 1WYIA |                                                                                                                        |               |
| 1WYIA | <a href="#">CYS41(N)</a>  | 4.93 | <a href="#">VAL61(N)</a>   | 1WYIA |                                                                                                                        |               |
| 1WYIA | <a href="#">CYS41(N)</a>  | 4.68 | <a href="#">VAL61(CA)</a>  | 1WYIA |                                                                                                                        |               |
| 1WYIA | <a href="#">CYS41(C)</a>  | 4.63 | <a href="#">VAL61(CA)</a>  | 1WYIA |                                                                                                                        |               |
| 1WYIA | <a href="#">CYS41(C)</a>  | 4.74 | <a href="#">VAL61(C)</a>   | 1WYIA |                                                                                                                        |               |
| 1WYIA | <a href="#">CYS41(O)</a>  | 4.57 | <a href="#">VAL61(N)</a>   | 1WYIA | [D-A-AA]:137.0° [A-D-DD]:36.8° d_planarity:14.9°<br>a_planarity:-24.8°, maximum distance exceeded,<br>bad d_angle(sp2) |               |
| 1WYIA | <a href="#">CYS41(O)</a>  | 3.52 | <a href="#">VAL61(CA)</a>  | 1WYIA |                                                                                                                        | O[ ] ... C[ ] |

|       |                           |      |                             |       |                                                                                       |               |
|-------|---------------------------|------|-----------------------------|-------|---------------------------------------------------------------------------------------|---------------|
| 1WYIA | <a href="#">CYS41(O)</a>  | 3.62 | <a href="#">VAL61(C)</a>    | 1WYIA |                                                                                       | O[ ] ... C[ ] |
| 1WYIA | <a href="#">CYS41(O)</a>  | 4.80 | <a href="#">VAL61(O)</a>    | 1WYIA |                                                                                       |               |
| 1WYIA | <a href="#">CYS41(O)</a>  | 4.34 | <a href="#">VAL61(CB)</a>   | 1WYIA |                                                                                       | O[ ] ... C[ ] |
| 1WYIA | <a href="#">CYS41(O)</a>  | 4.10 | <a href="#">VAL61(CG1)</a>  | 1WYIA |                                                                                       | O[ ] ... C[ ] |
| 1WYIA | <a href="#">CYS41(O)</a>  | 4.82 | <a href="#">VAL61(CG2)</a>  | 1WYIA |                                                                                       |               |
| 1WYIA | <a href="#">CYS41(N)</a>  | 4.71 | <a href="#">ALA62(N)</a>    | 1WYIA |                                                                                       |               |
| 1WYIA | <a href="#">CYS41(CA)</a> | 4.94 | <a href="#">ALA62(N)</a>    | 1WYIA |                                                                                       |               |
| 1WYIA | <a href="#">CYS41(C)</a>  | 3.90 | <a href="#">ALA62(N)</a>    | 1WYIA |                                                                                       | C[ ] ... N[ ] |
| 1WYIA | <a href="#">CYS41(C)</a>  | 4.59 | <a href="#">ALA62(CA)</a>   | 1WYIA |                                                                                       |               |
| 1WYIA | <a href="#">CYS41(C)</a>  | 4.90 | <a href="#">ALA62(C)</a>    | 1WYIA |                                                                                       |               |
| 1WYIA | <a href="#">CYS41(C)</a>  | 4.25 | <a href="#">ALA62(O)</a>    | 1WYIA |                                                                                       | C[ ] ... O[ ] |
| 1WYIA | <a href="#">CYS41(C)</a>  | 4.35 | <a href="#">ALA62(CB)</a>   | 1WYIA |                                                                                       | C[ ] ... C[ ] |
| 1WYIA | <a href="#">CYS41(O)</a>  | 2.83 | <a href="#">ALA62(N)</a>    | 1WYIA | <b>H-bond</b> [D-A-AA]:144.1° [A-D-DD]:118.4° d_planarity:-20.0°<br>a_planarity:72.2° | O[ ] ... N[ ] |
| 1WYIA | <a href="#">CYS41(O)</a>  | 3.75 | <a href="#">ALA62(CA)</a>   | 1WYIA |                                                                                       | O[ ] ... C[ ] |
| 1WYIA | <a href="#">CYS41(O)</a>  | 4.12 | <a href="#">ALA62(C)</a>    | 1WYIA |                                                                                       | O[ ] ... C[ ] |
| 1WYIA | <a href="#">CYS41(O)</a>  | 3.57 | <a href="#">ALA62(O)</a>    | 1WYIA |                                                                                       | O[ ] ... O[ ] |
| 1WYIA | <a href="#">CYS41(O)</a>  | 3.85 | <a href="#">ALA62(CB)</a>   | 1WYIA |                                                                                       | O[ ] ... C[ ] |
| 1WYIA | <a href="#">CYS41(SG)</a> | 4.99 | <a href="#">PHE240(CD2)</a> | 1WYIA |                                                                                       |               |
| 1WYIA | <a href="#">CYS41(SG)</a> | 4.14 | <a href="#">PHE240(CE2)</a> | 1WYIA |                                                                                       | S[ ] ... C[ ] |
| 1WYIA | <a href="#">CYS41(SG)</a> | 4.47 | <a href="#">PHE240(CZ)</a>  | 1WYIA |                                                                                       | S[ ] ... C[ ] |

| chain1 | res1/atm1                 | distance | res2/atm2                  | chain2 | H-bonding                                                                                                             | Charge interaction |
|--------|---------------------------|----------|----------------------------|--------|-----------------------------------------------------------------------------------------------------------------------|--------------------|
| 1WYIA  | <a href="#">CYS86(O)</a>  | 4.63     | <a href="#">ILE48(O)</a>   | 1WYIA  |                                                                                                                       |                    |
| 1WYIA  | <a href="#">CYS86(CB)</a> | 4.90     | <a href="#">ILE48(C)</a>   | 1WYIA  |                                                                                                                       |                    |
| 1WYIA  | <a href="#">CYS86(CB)</a> | 4.97     | <a href="#">ILE48(CB)</a>  | 1WYIA  |                                                                                                                       |                    |
| 1WYIA  | <a href="#">CYS86(CB)</a> | 4.11     | <a href="#">ILE48(CG2)</a> | 1WYIA  |                                                                                                                       | C[ ] ... C[ ]      |
| 1WYIA  | <a href="#">CYS86(SG)</a> | 4.83     | <a href="#">ILE48(CG2)</a> | 1WYIA  |                                                                                                                       |                    |
| 1WYIA  | <a href="#">CYS86(CA)</a> | 4.38     | <a href="#">ASP49(OD1)</a> | 1WYIA  |                                                                                                                       | C[ ] ... O[-]      |
| 1WYIA  | <a href="#">CYS86(C)</a>  | 4.64     | <a href="#">ASP49(OD1)</a> | 1WYIA  |                                                                                                                       |                    |
| 1WYIA  | <a href="#">CYS86(O)</a>  | 4.53     | <a href="#">ASP49(CA)</a>  | 1WYIA  |                                                                                                                       |                    |
| 1WYIA  | <a href="#">CYS86(O)</a>  | 4.08     | <a href="#">ASP49(OD1)</a> | 1WYIA  |                                                                                                                       | O[ ] ... O[-]      |
| 1WYIA  | <a href="#">CYS86(CB)</a> | 4.52     | <a href="#">ASP49(N)</a>   | 1WYIA  |                                                                                                                       |                    |
| 1WYIA  | <a href="#">CYS86(CB)</a> | 4.35     | <a href="#">ASP49(CA)</a>  | 1WYIA  |                                                                                                                       | C[ ] ... C[ ]      |
| 1WYIA  | <a href="#">CYS86(CB)</a> | 4.40     | <a href="#">ASP49(CB)</a>  | 1WYIA  |                                                                                                                       | C[ ] ... C[ ]      |
| 1WYIA  | <a href="#">CYS86(CB)</a> | 4.55     | <a href="#">ASP49(CG)</a>  | 1WYIA  |                                                                                                                       |                    |
| 1WYIA  | <a href="#">CYS86(CB)</a> | 4.24     | <a href="#">ASP49(OD1)</a> | 1WYIA  |                                                                                                                       | C[ ] ... O[-]      |
| 1WYIA  | <a href="#">CYS86(SG)</a> | 4.98     | <a href="#">ASP49(N)</a>   | 1WYIA  | [D-A-AA]:65.1° [A-D-DD]:79.3° d_planarity:-69.5°, <b>maximum distance exceeded, bad d_angle(sp2), bad d_planarity</b> |                    |
| 1WYIA  | <a href="#">CYS86(SG)</a> | 4.92     | <a href="#">ASP49(CA)</a>  | 1WYIA  |                                                                                                                       |                    |
| 1WYIA  | <a href="#">CYS86(SG)</a> | 4.46     | <a href="#">ASP49(CB)</a>  | 1WYIA  |                                                                                                                       | S[ ] ... C[ ]      |
| 1WYIA  | <a href="#">CYS86(SG)</a> | 4.67     | <a href="#">ASP49(CG)</a>  | 1WYIA  |                                                                                                                       |                    |
| 1WYIA  | <a href="#">CYS86(SG)</a> | 4.78     | <a href="#">ASP49(OD1)</a> | 1WYIA  | Negative                                                                                                              |                    |
| 1WYIA  | <a href="#">CYS86(C)</a>  | 4.74     | <a href="#">ARG52(CB)</a>  | 1WYIA  |                                                                                                                       |                    |
| 1WYIA  | <a href="#">CYS86(C)</a>  | 4.37     | <a href="#">ARG52(CG)</a>  | 1WYIA  |                                                                                                                       | C[ ] ... C[ ]      |
| 1WYIA  | <a href="#">CYS86(O)</a>  | 3.55     | <a href="#">ARG52(CB)</a>  | 1WYIA  |                                                                                                                       | O[ ] ... C[ ]      |
| 1WYIA  | <a href="#">CYS86(O)</a>  | 3.33     | <a href="#">ARG52(CG)</a>  | 1WYIA  |                                                                                                                       | O[ ] ... C[ ]      |

|       |                           |      |                            |       |                                                                                                                  |               |
|-------|---------------------------|------|----------------------------|-------|------------------------------------------------------------------------------------------------------------------|---------------|
| 1WYIA | <a href="#">CYS86(O)</a>  | 4.42 | <a href="#">ARG52(CD)</a>  | 1WYIA |                                                                                                                  | O[ ] ... C[ ] |
| 1WYIA | <a href="#">CYS86(N)</a>  | 4.95 | <a href="#">GLY81(O)</a>   | 1WYIA | [D-A-AA]:128.9° [A-D-DD]:164.2° d_planarity:-41.2°<br>a_planarity:35.6°, <b>maximum distance exceeded</b>        |               |
| 1WYIA | <a href="#">CYS86(N)</a>  | 4.97 | <a href="#">MET82(CA)</a>  | 1WYIA |                                                                                                                  |               |
| 1WYIA | <a href="#">CYS86(N)</a>  | 3.97 | <a href="#">MET82(C)</a>   | 1WYIA |                                                                                                                  | N[ ] ... C[ ] |
| 1WYIA | <a href="#">CYS86(N)</a>  | 2.77 | <a href="#">MET82(O)</a>   | 1WYIA | <b>H-bond</b> [D-A-AA]:165.3° [A-D-DD]:123.0° d_planarity:-41.9°<br>a_planarity:71.8°                            | N[ ] ... O[ ] |
| 1WYIA | <a href="#">CYS86(CA)</a> | 4.97 | <a href="#">MET82(C)</a>   | 1WYIA |                                                                                                                  |               |
| 1WYIA | <a href="#">CYS86(CA)</a> | 3.76 | <a href="#">MET82(O)</a>   | 1WYIA |                                                                                                                  | C[ ] ... O[ ] |
| 1WYIA | <a href="#">CYS86(C)</a>  | 4.86 | <a href="#">MET82(O)</a>   | 1WYIA |                                                                                                                  |               |
| 1WYIA | <a href="#">CYS86(CB)</a> | 4.69 | <a href="#">MET82(C)</a>   | 1WYIA |                                                                                                                  |               |
| 1WYIA | <a href="#">CYS86(CB)</a> | 3.61 | <a href="#">MET82(O)</a>   | 1WYIA |                                                                                                                  | C[ ] ... O[ ] |
| 1WYIA | <a href="#">CYS86(SG)</a> | 4.96 | <a href="#">MET82(CA)</a>  | 1WYIA |                                                                                                                  |               |
| 1WYIA | <a href="#">CYS86(SG)</a> | 4.13 | <a href="#">MET82(C)</a>   | 1WYIA |                                                                                                                  | S[ ] ... C[ ] |
| 1WYIA | <a href="#">CYS86(SG)</a> | 3.22 | <a href="#">MET82(O)</a>   | 1WYIA |                                                                                                                  | S[ ] ... O[ ] |
| 1WYIA | <a href="#">CYS86(N)</a>  | 4.76 | <a href="#">ILE83(N)</a>   | 1WYIA |                                                                                                                  |               |
| 1WYIA | <a href="#">CYS86(N)</a>  | 4.61 | <a href="#">ILE83(CA)</a>  | 1WYIA |                                                                                                                  |               |
| 1WYIA | <a href="#">CYS86(N)</a>  | 3.79 | <a href="#">ILE83(C)</a>   | 1WYIA |                                                                                                                  | N[ ] ... C[ ] |
| 1WYIA | <a href="#">CYS86(N)</a>  | 3.33 | <a href="#">ILE83(O)</a>   | 1WYIA | <b>H-bond</b> [D-A-AA]:102.1° [A-D-DD]:99.3° d_planarity:-21.5°<br>a_planarity:79.3°                             | N[ ] ... O[ ] |
| 1WYIA | <a href="#">CYS86(CA)</a> | 4.58 | <a href="#">ILE83(C)</a>   | 1WYIA |                                                                                                                  |               |
| 1WYIA | <a href="#">CYS86(CA)</a> | 3.84 | <a href="#">ILE83(O)</a>   | 1WYIA |                                                                                                                  | C[ ] ... O[ ] |
| 1WYIA | <a href="#">CYS86(C)</a>  | 4.89 | <a href="#">ILE83(C)</a>   | 1WYIA |                                                                                                                  |               |
| 1WYIA | <a href="#">CYS86(C)</a>  | 3.86 | <a href="#">ILE83(O)</a>   | 1WYIA |                                                                                                                  | C[ ] ... O[ ] |
| 1WYIA | <a href="#">CYS86(O)</a>  | 4.64 | <a href="#">ILE83(O)</a>   | 1WYIA |                                                                                                                  |               |
| 1WYIA | <a href="#">CYS86(CB)</a> | 4.76 | <a href="#">ILE83(CA)</a>  | 1WYIA |                                                                                                                  |               |
| 1WYIA | <a href="#">CYS86(CB)</a> | 4.50 | <a href="#">ILE83(C)</a>   | 1WYIA |                                                                                                                  | C[ ] ... C[ ] |
| 1WYIA | <a href="#">CYS86(CB)</a> | 3.83 | <a href="#">ILE83(O)</a>   | 1WYIA |                                                                                                                  | C[ ] ... O[ ] |
| 1WYIA | <a href="#">CYS86(SG)</a> | 4.85 | <a href="#">ILE83(N)</a>   | 1WYIA | [D-A-AA]:91.1° [A-D-DD]:81.5° d_planarity:31.9°, <b>maximum distance exceeded, bad d_angle(sp2)</b>              |               |
| 1WYIA | <a href="#">CYS86(SG)</a> | 4.85 | <a href="#">ILE83(CA)</a>  | 1WYIA |                                                                                                                  |               |
| 1WYIA | <a href="#">CYS86(SG)</a> | 4.76 | <a href="#">ILE83(O)</a>   | 1WYIA |                                                                                                                  |               |
| 1WYIA | <a href="#">CYS86(N)</a>  | 4.19 | <a href="#">LYS84(N)</a>   | 1WYIA |                                                                                                                  | N[ ] ... N[ ] |
| 1WYIA | <a href="#">CYS86(N)</a>  | 4.13 | <a href="#">LYS84(CA)</a>  | 1WYIA |                                                                                                                  | N[ ] ... C[ ] |
| 1WYIA | <a href="#">CYS86(N)</a>  | 2.96 | <a href="#">LYS84(C)</a>   | 1WYIA |                                                                                                                  | N[ ] ... C[ ] |
| 1WYIA | <a href="#">CYS86(N)</a>  | 2.90 | <a href="#">LYS84(O)</a>   | 1WYIA | [D-A-AA]:80.6° [A-D-DD]:120.6° d_planarity:-87.0°<br>a_planarity:49.4°, <b>bad a_angle(sp2), bad d_planarity</b> | N[ ] ... O[ ] |
| 1WYIA | <a href="#">CYS86(CA)</a> | 4.18 | <a href="#">LYS84(C)</a>   | 1WYIA |                                                                                                                  | C[ ] ... C[ ] |
| 1WYIA | <a href="#">CYS86(CA)</a> | 3.85 | <a href="#">LYS84(O)</a>   | 1WYIA |                                                                                                                  | C[ ] ... O[ ] |
| 1WYIA | <a href="#">CYS86(C)</a>  | 4.33 | <a href="#">LYS84(C)</a>   | 1WYIA |                                                                                                                  | C[ ] ... C[ ] |
| 1WYIA | <a href="#">CYS86(C)</a>  | 3.66 | <a href="#">LYS84(O)</a>   | 1WYIA |                                                                                                                  | C[ ] ... O[ ] |
| 1WYIA | <a href="#">CYS86(O)</a>  | 4.79 | <a href="#">LYS84(O)</a>   | 1WYIA |                                                                                                                  |               |
| 1WYIA | <a href="#">CYS86(CB)</a> | 4.96 | <a href="#">LYS84(O)</a>   | 1WYIA |                                                                                                                  |               |
| 1WYIA | <a href="#">CYS86(N)</a>  | 2.73 | <a href="#">ASP85(N)</a>   | 1WYIA |                                                                                                                  | N[ ] ... N[ ] |
| 1WYIA | <a href="#">CYS86(N)</a>  | 2.43 | <a href="#">ASP85(CA)</a>  | 1WYIA |                                                                                                                  | N[ ] ... C[ ] |
| 1WYIA | <a href="#">CYS86(N)</a>  | 2.24 | <a href="#">ASP85(O)</a>   | 1WYIA | [D-A-AA]:29.8° [A-D-DD]:94.4° d_planarity:0.3°<br>a_planarity:0.4°, <b>bad a_angle(sp2)</b>                      | N[ ] ... O[ ] |
| 1WYIA | <a href="#">CYS86(N)</a>  | 3.30 | <a href="#">ASP85(CB)</a>  | 1WYIA |                                                                                                                  | N[ ] ... C[ ] |
| 1WYIA | <a href="#">CYS86(N)</a>  | 4.12 | <a href="#">ASP85(CG)</a>  | 1WYIA |                                                                                                                  | N[ ] ... C[ ] |
| 1WYIA | <a href="#">CYS86(N)</a>  | 4.84 | <a href="#">ASP85(OD1)</a> | 1WYIA | [D-A-AA]:48.8° [A-D-DD]:129.6° d_planarity:21.3°<br>a_planarity:53.4°, <b>maximum distance exceeded,</b>         |               |

|       |                           |      |                            |       |                                                                                                                       |               |
|-------|---------------------------|------|----------------------------|-------|-----------------------------------------------------------------------------------------------------------------------|---------------|
|       |                           |      |                            |       | bad a_angle(sp2)                                                                                                      |               |
| 1WYIA | <a href="#">CYS86(N)</a>  | 4.53 | <a href="#">ASP85(OD2)</a> | 1WYIA | [D-A-AA]:63.3° [A-D-DD]:116.2° d_planarity:49.1°<br>a_planarity:46.2°, maximum distance exceeded,<br>bad a_angle(sp2) |               |
| 1WYIA | <a href="#">CYS86(CA)</a> | 4.16 | <a href="#">ASP85(N)</a>   | 1WYIA |                                                                                                                       | C[ ] ... N[ ] |
| 1WYIA | <a href="#">CYS86(CA)</a> | 3.80 | <a href="#">ASP85(CA)</a>  | 1WYIA |                                                                                                                       | C[ ] ... C[ ] |
| 1WYIA | <a href="#">CYS86(CA)</a> | 2.43 | <a href="#">ASP85(C)</a>   | 1WYIA |                                                                                                                       | C[ ] ... C[ ] |
| 1WYIA | <a href="#">CYS86(CA)</a> | 2.76 | <a href="#">ASP85(O)</a>   | 1WYIA |                                                                                                                       | C[ ] ... O[ ] |
| 1WYIA | <a href="#">CYS86(CA)</a> | 4.59 | <a href="#">ASP85(CB)</a>  | 1WYIA |                                                                                                                       |               |
| 1WYIA | <a href="#">CYS86(C)</a>  | 4.75 | <a href="#">ASP85(N)</a>   | 1WYIA |                                                                                                                       |               |
| 1WYIA | <a href="#">CYS86(C)</a>  | 4.61 | <a href="#">ASP85(CA)</a>  | 1WYIA |                                                                                                                       |               |
| 1WYIA | <a href="#">CYS86(C)</a>  | 3.33 | <a href="#">ASP85(C)</a>   | 1WYIA |                                                                                                                       | C[ ] ... C[ ] |
| 1WYIA | <a href="#">CYS86(C)</a>  | 3.55 | <a href="#">ASP85(O)</a>   | 1WYIA |                                                                                                                       | C[ ] ... O[ ] |
| 1WYIA | <a href="#">CYS86(O)</a>  | 4.47 | <a href="#">ASP85(C)</a>   | 1WYIA |                                                                                                                       | O[ ] ... C[ ] |
| 1WYIA | <a href="#">CYS86(O)</a>  | 4.55 | <a href="#">ASP85(O)</a>   | 1WYIA |                                                                                                                       |               |
| 1WYIA | <a href="#">CYS86(CB)</a> | 4.96 | <a href="#">ASP85(N)</a>   | 1WYIA |                                                                                                                       |               |
| 1WYIA | <a href="#">CYS86(CB)</a> | 4.80 | <a href="#">ASP85(CA)</a>  | 1WYIA |                                                                                                                       |               |
| 1WYIA | <a href="#">CYS86(CB)</a> | 3.62 | <a href="#">ASP85(C)</a>   | 1WYIA |                                                                                                                       | C[ ] ... C[ ] |
| 1WYIA | <a href="#">CYS86(CB)</a> | 4.09 | <a href="#">ASP85(O)</a>   | 1WYIA |                                                                                                                       | C[ ] ... O[ ] |
| 1WYIA | <a href="#">CYS86(SG)</a> | 4.95 | <a href="#">ASP85(CA)</a>  | 1WYIA |                                                                                                                       |               |
| 1WYIA | <a href="#">CYS86(SG)</a> | 4.03 | <a href="#">ASP85(C)</a>   | 1WYIA |                                                                                                                       | S[ ] ... C[ ] |
| 1WYIA | <a href="#">CYS86(SG)</a> | 4.49 | <a href="#">ASP85(O)</a>   | 1WYIA |                                                                                                                       | S[ ] ... O[ ] |
| 1WYIA | <a href="#">CYS86(SG)</a> | 4.89 | <a href="#">ASP85(CB)</a>  | 1WYIA |                                                                                                                       |               |
| 1WYIA | <a href="#">CYS86(N)</a>  | 2.70 | <a href="#">GLY87(N)</a>   | 1WYIA |                                                                                                                       | N[ ] ... N[ ] |
| 1WYIA | <a href="#">CYS86(N)</a>  | 4.15 | <a href="#">GLY87(CA)</a>  | 1WYIA |                                                                                                                       | N[ ] ... C[ ] |
| 1WYIA | <a href="#">CYS86(N)</a>  | 4.95 | <a href="#">GLY87(C)</a>   | 1WYIA |                                                                                                                       |               |
| 1WYIA | <a href="#">CYS86(CA)</a> | 2.45 | <a href="#">GLY87(N)</a>   | 1WYIA |                                                                                                                       | C[ ] ... N[ ] |
| 1WYIA | <a href="#">CYS86(CA)</a> | 3.81 | <a href="#">GLY87(CA)</a>  | 1WYIA |                                                                                                                       | C[ ] ... C[ ] |
| 1WYIA | <a href="#">CYS86(CA)</a> | 4.64 | <a href="#">GLY87(C)</a>   | 1WYIA |                                                                                                                       |               |
| 1WYIA | <a href="#">CYS86(C)</a>  | 2.41 | <a href="#">GLY87(CA)</a>  | 1WYIA |                                                                                                                       | C[ ] ... C[ ] |
| 1WYIA | <a href="#">CYS86(C)</a>  | 3.28 | <a href="#">GLY87(C)</a>   | 1WYIA |                                                                                                                       | C[ ] ... C[ ] |
| 1WYIA | <a href="#">CYS86(C)</a>  | 4.41 | <a href="#">GLY87(O)</a>   | 1WYIA |                                                                                                                       | C[ ] ... O[ ] |
| 1WYIA | <a href="#">CYS86(O)</a>  | 2.23 | <a href="#">GLY87(N)</a>   | 1WYIA | [D-A-AA]:30.3° [A-D-DD]:92.1° d_planarity:0.5°<br>a_planarity:0.3°, bad a_angle(sp2)                                  | O[ ] ... N[ ] |
| 1WYIA | <a href="#">CYS86(O)</a>  | 2.71 | <a href="#">GLY87(CA)</a>  | 1WYIA |                                                                                                                       | O[ ] ... C[ ] |
| 1WYIA | <a href="#">CYS86(O)</a>  | 3.37 | <a href="#">GLY87(C)</a>   | 1WYIA |                                                                                                                       | O[ ] ... C[ ] |
| 1WYIA | <a href="#">CYS86(O)</a>  | 4.31 | <a href="#">GLY87(O)</a>   | 1WYIA |                                                                                                                       | O[ ] ... O[ ] |
| 1WYIA | <a href="#">CYS86(CB)</a> | 3.58 | <a href="#">GLY87(N)</a>   | 1WYIA |                                                                                                                       | C[ ] ... N[ ] |
| 1WYIA | <a href="#">CYS86(CB)</a> | 4.79 | <a href="#">GLY87(CA)</a>  | 1WYIA |                                                                                                                       |               |
| 1WYIA | <a href="#">CYS86(N)</a>  | 4.60 | <a href="#">ALA88(N)</a>   | 1WYIA |                                                                                                                       |               |
| 1WYIA | <a href="#">CYS86(CA)</a> | 4.37 | <a href="#">ALA88(N)</a>   | 1WYIA |                                                                                                                       | C[ ] ... N[ ] |
| 1WYIA | <a href="#">CYS86(C)</a>  | 3.27 | <a href="#">ALA88(N)</a>   | 1WYIA |                                                                                                                       | C[ ] ... N[ ] |
| 1WYIA | <a href="#">CYS86(C)</a>  | 4.63 | <a href="#">ALA88(CA)</a>  | 1WYIA |                                                                                                                       |               |
| 1WYIA | <a href="#">CYS86(C)</a>  | 4.96 | <a href="#">ALA88(CB)</a>  | 1WYIA |                                                                                                                       |               |
| 1WYIA | <a href="#">CYS86(O)</a>  | 3.46 | <a href="#">ALA88(N)</a>   | 1WYIA | [D-A-AA]:71.0° [A-D-DD]:140.4° d_planarity:-75.9°<br>a_planarity:47.3°, bad a_angle(sp2), bad d_planarity             | O[ ] ... N[ ] |
| 1WYIA | <a href="#">CYS86(O)</a>  | 4.68 | <a href="#">ALA88(CA)</a>  | 1WYIA |                                                                                                                       |               |
| 1WYIA | <a href="#">CYS86(O)</a>  | 4.99 | <a href="#">ALA88(CB)</a>  | 1WYIA |                                                                                                                       |               |
| 1WYIA | <a href="#">CYS86(CB)</a> | 4.67 | <a href="#">ALA88(N)</a>   | 1WYIA |                                                                                                                       |               |
| 1WYIA | <a href="#">CYS86(CA)</a> | 4.61 | <a href="#">LYS18(CE)</a>  | 1WYIB |                                                                                                                       |               |

|       |                           |      |                            |       |                                                                                                                        |               |
|-------|---------------------------|------|----------------------------|-------|------------------------------------------------------------------------------------------------------------------------|---------------|
| 1WYIA | <a href="#">CYS86(CA)</a> | 4.66 | <a href="#">LYS18(NZ)</a>  | 1WYIB |                                                                                                                        |               |
| 1WYIA | <a href="#">CYS86(SG)</a> | 4.81 | <a href="#">LYS18(CE)</a>  | 1WYIB | positive                                                                                                               |               |
| 1WYIA | <a href="#">CYS86(SG)</a> | 4.86 | <a href="#">ALA46(C)</a>   | 1WYIB |                                                                                                                        |               |
| 1WYIA | <a href="#">CYS86(SG)</a> | 4.36 | <a href="#">ALA46(O)</a>   | 1WYIB |                                                                                                                        | S[ ] ... O[ ] |
| 1WYIA | <a href="#">CYS86(SG)</a> | 4.29 | <a href="#">ALA46(CB)</a>  | 1WYIB |                                                                                                                        | S[ ] ... C[ ] |
| 1WYIA | <a href="#">CYS86(N)</a>  | 4.78 | <a href="#">TYR47(OH)</a>  | 1WYIB | [D-A-AA]:115.4° [A-D-DD]:117.0° d_planarity:85.2°<br>a_planarity:-16.8°, maximum distance exceeded,<br>bad d_planarity |               |
| 1WYIA | <a href="#">CYS86(SG)</a> | 4.10 | <a href="#">TYR47(CD1)</a> | 1WYIB |                                                                                                                        | S[ ] ... C[ ] |
| 1WYIA | <a href="#">CYS86(SG)</a> | 3.41 | <a href="#">TYR47(CE1)</a> | 1WYIB |                                                                                                                        | S[ ] ... C[ ] |
| 1WYIA | <a href="#">CYS86(SG)</a> | 4.15 | <a href="#">TYR47(CZ)</a>  | 1WYIB |                                                                                                                        | S[ ] ... C[ ] |
| 1WYIA | <a href="#">CYS86(SG)</a> | 4.21 | <a href="#">TYR47(OH)</a>  | 1WYIB | [D-A-AA]:129.8° [A-D-DD]:78.0° d_planarity:-34.2°,<br>maximum distance exceeded, bad d_angle(sp2)                      | S[ ] ... O[ ] |

| chain1 | res1/atm1                  | distance | res2/atm2                  | chain2 | H-bonding                                                                                                                                | Charge interaction |
|--------|----------------------------|----------|----------------------------|--------|------------------------------------------------------------------------------------------------------------------------------------------|--------------------|
| 1WYIA  | <a href="#">CYS126(SG)</a> | 3.68     | <a href="#">VAL92(CG1)</a> | 1WYIA  |                                                                                                                                          | S[ ] ... C[ ]      |
| 1WYIA  | <a href="#">CYS126(N)</a>  | 4.82     | <a href="#">LEU93(N)</a>   | 1WYIA  |                                                                                                                                          |                    |
| 1WYIA  | <a href="#">CYS126(N)</a>  | 4.91     | <a href="#">LEU93(CA)</a>  | 1WYIA  |                                                                                                                                          |                    |
| 1WYIA  | <a href="#">CYS126(N)</a>  | 3.92     | <a href="#">LEU93(C)</a>   | 1WYIA  |                                                                                                                                          | N[ ] ... C[ ]      |
| 1WYIA  | <a href="#">CYS126(N)</a>  | 2.69     | <a href="#">LEU93(O)</a>   | 1WYIA  | <b>H-bond</b> [D-A-AA]:178.6° [A-D-DD]:115.8° d_planarity:-5.4°<br>a_planarity:7.6°                                                      | N[ ] ... O[ ]      |
| 1WYIA  | <a href="#">CYS126(CA)</a> | 4.74     | <a href="#">LEU93(C)</a>   | 1WYIA  |                                                                                                                                          |                    |
| 1WYIA  | <a href="#">CYS126(CA)</a> | 3.58     | <a href="#">LEU93(O)</a>   | 1WYIA  |                                                                                                                                          | C[ ] ... O[ ]      |
| 1WYIA  | <a href="#">CYS126(C)</a>  | 4.31     | <a href="#">LEU93(O)</a>   | 1WYIA  |                                                                                                                                          | C[ ] ... O[ ]      |
| 1WYIA  | <a href="#">CYS126(O)</a>  | 4.95     | <a href="#">LEU93(C)</a>   | 1WYIA  |                                                                                                                                          |                    |
| 1WYIA  | <a href="#">CYS126(O)</a>  | 4.05     | <a href="#">LEU93(O)</a>   | 1WYIA  |                                                                                                                                          | O[ ] ... O[ ]      |
| 1WYIA  | <a href="#">CYS126(CB)</a> | 4.42     | <a href="#">LEU93(C)</a>   | 1WYIA  |                                                                                                                                          | C[ ] ... C[ ]      |
| 1WYIA  | <a href="#">CYS126(CB)</a> | 3.47     | <a href="#">LEU93(O)</a>   | 1WYIA  |                                                                                                                                          | C[ ] ... O[ ]      |
| 1WYIA  | <a href="#">CYS126(SG)</a> | 4.80     | <a href="#">LEU93(N)</a>   | 1WYIA  | [D-A-AA]:103.5° [A-D-DD]:102.8° d_planarity:-62.8°,<br>maximum distance exceeded, bad d_planarity                                        |                    |
| 1WYIA  | <a href="#">CYS126(SG)</a> | 4.55     | <a href="#">LEU93(C)</a>   | 1WYIA  |                                                                                                                                          |                    |
| 1WYIA  | <a href="#">CYS126(SG)</a> | 3.76     | <a href="#">LEU93(O)</a>   | 1WYIA  |                                                                                                                                          | S[ ] ... O[ ]      |
| 1WYIA  | <a href="#">CYS126(N)</a>  | 4.76     | <a href="#">GLY94(N)</a>   | 1WYIA  |                                                                                                                                          |                    |
| 1WYIA  | <a href="#">CYS126(N)</a>  | 4.64     | <a href="#">GLY94(CA)</a>  | 1WYIA  |                                                                                                                                          |                    |
| 1WYIA  | <a href="#">CYS126(N)</a>  | 4.65     | <a href="#">GLY94(C)</a>   | 1WYIA  |                                                                                                                                          |                    |
| 1WYIA  | <a href="#">CYS126(N)</a>  | 4.73     | <a href="#">GLY94(O)</a>   | 1WYIA  | [D-A-AA]:78.8° [A-D-DD]:60.8° d_planarity:-11.9°<br>a_planarity:-76.8°, maximum distance exceeded,<br>bad a_angle(sp2), bad d_angle(sp2) |                    |
| 1WYIA  | <a href="#">CYS126(CA)</a> | 4.87     | <a href="#">GLY94(CA)</a>  | 1WYIA  |                                                                                                                                          |                    |
| 1WYIA  | <a href="#">CYS126(CA)</a> | 4.47     | <a href="#">GLY94(C)</a>   | 1WYIA  |                                                                                                                                          | C[ ] ... C[ ]      |
| 1WYIA  | <a href="#">CYS126(CA)</a> | 4.21     | <a href="#">GLY94(O)</a>   | 1WYIA  |                                                                                                                                          | C[ ] ... O[ ]      |
| 1WYIA  | <a href="#">CYS126(C)</a>  | 4.87     | <a href="#">GLY94(CA)</a>  | 1WYIA  |                                                                                                                                          |                    |
| 1WYIA  | <a href="#">CYS126(C)</a>  | 4.51     | <a href="#">GLY94(C)</a>   | 1WYIA  |                                                                                                                                          |                    |
| 1WYIA  | <a href="#">CYS126(C)</a>  | 3.93     | <a href="#">GLY94(O)</a>   | 1WYIA  |                                                                                                                                          | C[ ] ... O[ ]      |
| 1WYIA  | <a href="#">CYS126(O)</a>  | 4.08     | <a href="#">GLY94(CA)</a>  | 1WYIA  |                                                                                                                                          | O[ ] ... C[ ]      |
| 1WYIA  | <a href="#">CYS126(O)</a>  | 3.95     | <a href="#">GLY94(C)</a>   | 1WYIA  |                                                                                                                                          | O[ ] ... C[ ]      |
| 1WYIA  | <a href="#">CYS126(O)</a>  | 3.35     | <a href="#">GLY94(O)</a>   | 1WYIA  |                                                                                                                                          | O[ ] ... O[ ]      |
| 1WYIA  | <a href="#">CYS126(CB)</a> | 4.84     | <a href="#">GLY94(N)</a>   | 1WYIA  |                                                                                                                                          |                    |



|       |                            |      |                             |       |                                                                                                                                |               |
|-------|----------------------------|------|-----------------------------|-------|--------------------------------------------------------------------------------------------------------------------------------|---------------|
| 1WYIA | <a href="#">CYS126(CB)</a> | 4.38 | <a href="#">GLY94(CA)</a>   | 1WYIA |                                                                                                                                | C[ ] ... C[ ] |
| 1WYIA | <a href="#">CYS126(CB)</a> | 3.58 | <a href="#">GLY94(C)</a>    | 1WYIA |                                                                                                                                | C[ ] ... C[ ] |
| 1WYIA | <a href="#">CYS126(CB)</a> | 3.38 | <a href="#">GLY94(O)</a>    | 1WYIA |                                                                                                                                | C[ ] ... O[ ] |
| 1WYIA | <a href="#">CYS126(SG)</a> | 4.38 | <a href="#">GLY94(C)</a>    | 1WYIA |                                                                                                                                | S[ ] ... C[ ] |
| 1WYIA | <a href="#">CYS126(SG)</a> | 4.55 | <a href="#">GLY94(O)</a>    | 1WYIA |                                                                                                                                |               |
| 1WYIA | <a href="#">CYS126(CA)</a> | 4.96 | <a href="#">HIS95(N)</a>    | 1WYIA |                                                                                                                                |               |
| 1WYIA | <a href="#">CYS126(O)</a>  | 4.99 | <a href="#">HIS95(N)</a>    | 1WYIA | [D-A-AA]:98.6° [A-D-DD]:101.4° d_planarity:31.1°<br>a_planarity:-44.2°, <b>maximum distance exceeded</b>                       |               |
| 1WYIA | <a href="#">CYS126(CB)</a> | 3.79 | <a href="#">HIS95(N)</a>    | 1WYIA |                                                                                                                                | C[ ] ... N[ ] |
| 1WYIA | <a href="#">CYS126(CB)</a> | 3.78 | <a href="#">HIS95(CA)</a>   | 1WYIA |                                                                                                                                | C[ ] ... C[ ] |
| 1WYIA | <a href="#">CYS126(CB)</a> | 4.71 | <a href="#">HIS95(C)</a>    | 1WYIA |                                                                                                                                |               |
| 1WYIA | <a href="#">CYS126(CB)</a> | 4.78 | <a href="#">HIS95(CB)</a>   | 1WYIA |                                                                                                                                |               |
| 1WYIA | <a href="#">CYS126(SG)</a> | 4.05 | <a href="#">HIS95(N)</a>    | 1WYIA | [D-A-AA]:68.8° [A-D-DD]:73.2° d_planarity:87.2°,<br><b>maximum distance exceeded, bad d_angle(sp2),<br/>bad d_planarity</b>    | S[ ] ... N[ ] |
| 1WYIA | <a href="#">CYS126(SG)</a> | 3.89 | <a href="#">HIS95(CA)</a>   | 1WYIA |                                                                                                                                | S[ ] ... C[ ] |
| 1WYIA | <a href="#">CYS126(SG)</a> | 4.31 | <a href="#">HIS95(CB)</a>   | 1WYIA |                                                                                                                                | S[ ] ... C[ ] |
| 1WYIA | <a href="#">CYS126(SG)</a> | 4.53 | <a href="#">HIS95(CG)</a>   | 1WYIA |                                                                                                                                |               |
| 1WYIA | <a href="#">CYS126(SG)</a> | 4.12 | <a href="#">HIS95(CD2)</a>  | 1WYIA | Weakly positive                                                                                                                | S[ ] ... C[ ] |
| 1WYIA | <a href="#">CYS126(CB)</a> | 4.81 | <a href="#">SER96(N)</a>    | 1WYIA |                                                                                                                                |               |
| 1WYIA | <a href="#">CYS126(C)</a>  | 4.54 | <a href="#">ARG99(NE)</a>   | 1WYIA |                                                                                                                                |               |
| 1WYIA | <a href="#">CYS126(C)</a>  | 4.82 | <a href="#">ARG99(CZ)</a>   | 1WYIA |                                                                                                                                |               |
| 1WYIA | <a href="#">CYS126(C)</a>  | 4.18 | <a href="#">ARG99(NH2)</a>  | 1WYIA |                                                                                                                                | C[ ] ... N[+] |
| 1WYIA | <a href="#">CYS126(O)</a>  | 4.81 | <a href="#">ARG99(CD)</a>   | 1WYIA |                                                                                                                                |               |
| 1WYIA | <a href="#">CYS126(O)</a>  | 3.51 | <a href="#">ARG99(NE)</a>   | 1WYIA | [D-A-AA]:141.5° [A-D-DD]:85.3° d_planarity:-13.7°<br>a_planarity:72.4°, <b>maximum distance exceeded,<br/>bad d_angle(sp2)</b> | O[ ] ... N[ ] |
| 1WYIA | <a href="#">CYS126(O)</a>  | 3.65 | <a href="#">ARG99(CZ)</a>   | 1WYIA |                                                                                                                                | O[ ] ... C[ ] |
| 1WYIA | <a href="#">CYS126(O)</a>  | 4.93 | <a href="#">ARG99(NH1)</a>  | 1WYIA | [D-A-AA]:158.6° [A-D-DD]:13.9° d_planarity:51.7°<br>a_planarity:33.6°, <b>maximum distance exceeded,<br/>bad d_angle(sp2)</b>  |               |
| 1WYIA | <a href="#">CYS126(O)</a>  | 2.96 | <a href="#">ARG99(NH2)</a>  | 1WYIA | <b>H-bond</b> [D-A-AA]:170.8° [A-D-DD]:110.8° d_planarity:-<br>19.6° a_planarity:23.5°                                         | O[ ] ... N[+] |
| 1WYIA | <a href="#">CYS126(N)</a>  | 3.82 | <a href="#">ILE124(C)</a>   | 1WYIA |                                                                                                                                | N[ ] ... C[ ] |
| 1WYIA | <a href="#">CYS126(N)</a>  | 3.51 | <a href="#">ILE124(O)</a>   | 1WYIA | [D-A-AA]:94.9° [A-D-DD]:134.1° d_planarity:-82.7°<br>a_planarity:27.3°, <b>maximum distance exceeded,<br/>bad d_planarity</b>  | N[ ] ... O[ ] |
| 1WYIA | <a href="#">CYS126(CA)</a> | 4.65 | <a href="#">ILE124(O)</a>   | 1WYIA |                                                                                                                                |               |
| 1WYIA | <a href="#">CYS126(CB)</a> | 4.81 | <a href="#">ILE124(O)</a>   | 1WYIA |                                                                                                                                |               |
| 1WYIA | <a href="#">CYS126(SG)</a> | 4.79 | <a href="#">ILE124(C)</a>   | 1WYIA |                                                                                                                                |               |
| 1WYIA | <a href="#">CYS126(SG)</a> | 4.02 | <a href="#">ILE124(O)</a>   | 1WYIA |                                                                                                                                | S[ ] ... O[ ] |
| 1WYIA | <a href="#">CYS126(SG)</a> | 4.35 | <a href="#">ILE124(CG2)</a> | 1WYIA |                                                                                                                                | S[ ] ... C[ ] |
| 1WYIA | <a href="#">CYS126(N)</a>  | 3.42 | <a href="#">ALA125(N)</a>   | 1WYIA |                                                                                                                                | N[ ] ... N[ ] |
| 1WYIA | <a href="#">CYS126(N)</a>  | 2.41 | <a href="#">ALA125(CA)</a>  | 1WYIA |                                                                                                                                | N[ ] ... C[ ] |
| 1WYIA | <a href="#">CYS126(N)</a>  | 2.26 | <a href="#">ALA125(O)</a>   | 1WYIA | [D-A-AA]:29.3° [A-D-DD]:96.0° d_planarity:1.4°<br>a_planarity:1.7°, <b>bad a_angle(sp2)</b>                                    | N[ ] ... O[ ] |
| 1WYIA | <a href="#">CYS126(N)</a>  | 3.48 | <a href="#">ALA125(CB)</a>  | 1WYIA |                                                                                                                                | N[ ] ... C[ ] |
| 1WYIA | <a href="#">CYS126(CA)</a> | 4.69 | <a href="#">ALA125(N)</a>   | 1WYIA |                                                                                                                                |               |
| 1WYIA | <a href="#">CYS126(CA)</a> | 3.81 | <a href="#">ALA125(CA)</a>  | 1WYIA |                                                                                                                                | C[ ] ... C[ ] |
| 1WYIA | <a href="#">CYS126(CA)</a> | 2.45 | <a href="#">ALA125(C)</a>   | 1WYIA |                                                                                                                                | C[ ] ... C[ ] |
| 1WYIA | <a href="#">CYS126(CA)</a> | 2.82 | <a href="#">ALA125(O)</a>   | 1WYIA |                                                                                                                                | C[ ] ... O[ ] |
| 1WYIA | <a href="#">CYS126(CA)</a> | 4.76 | <a href="#">ALA125(CB)</a>  | 1WYIA |                                                                                                                                |               |

|       |                            |      |                             |       |                                                                                                                       |               |
|-------|----------------------------|------|-----------------------------|-------|-----------------------------------------------------------------------------------------------------------------------|---------------|
| 1WYIA | <a href="#">CYS126(C)</a>  | 4.70 | <a href="#">ALA125(CA)</a>  | 1WYIA |                                                                                                                       |               |
| 1WYIA | <a href="#">CYS126(C)</a>  | 3.40 | <a href="#">ALA125(C)</a>   | 1WYIA |                                                                                                                       | C[ ] ... C[ ] |
| 1WYIA | <a href="#">CYS126(C)</a>  | 3.61 | <a href="#">ALA125(O)</a>   | 1WYIA |                                                                                                                       | C[ ] ... O[ ] |
| 1WYIA | <a href="#">CYS126(O)</a>  | 4.95 | <a href="#">ALA125(CA)</a>  | 1WYIA |                                                                                                                       |               |
| 1WYIA | <a href="#">CYS126(O)</a>  | 3.92 | <a href="#">ALA125(C)</a>   | 1WYIA |                                                                                                                       | O[ ] ... C[ ] |
| 1WYIA | <a href="#">CYS126(O)</a>  | 4.36 | <a href="#">ALA125(O)</a>   | 1WYIA |                                                                                                                       | O[ ] ... O[ ] |
| 1WYIA | <a href="#">CYS126(CB)</a> | 4.77 | <a href="#">ALA125(CA)</a>  | 1WYIA |                                                                                                                       |               |
| 1WYIA | <a href="#">CYS126(CB)</a> | 3.64 | <a href="#">ALA125(C)</a>   | 1WYIA |                                                                                                                       | C[ ] ... C[ ] |
| 1WYIA | <a href="#">CYS126(CB)</a> | 4.16 | <a href="#">ALA125(O)</a>   | 1WYIA |                                                                                                                       | C[ ] ... O[ ] |
| 1WYIA | <a href="#">CYS126(SG)</a> | 4.95 | <a href="#">ALA125(CA)</a>  | 1WYIA |                                                                                                                       |               |
| 1WYIA | <a href="#">CYS126(SG)</a> | 4.07 | <a href="#">ALA125(C)</a>   | 1WYIA |                                                                                                                       | S[ ] ... C[ ] |
| 1WYIA | <a href="#">CYS126(SG)</a> | 4.62 | <a href="#">ALA125(O)</a>   | 1WYIA |                                                                                                                       |               |
| 1WYIA | <a href="#">CYS126(N)</a>  | 3.58 | <a href="#">ILE127(N)</a>   | 1WYIA |                                                                                                                       | N[ ] ... N[ ] |
| 1WYIA | <a href="#">CYS126(N)</a>  | 4.82 | <a href="#">ILE127(CA)</a>  | 1WYIA |                                                                                                                       |               |
| 1WYIA | <a href="#">CYS126(CA)</a> | 2.40 | <a href="#">ILE127(N)</a>   | 1WYIA |                                                                                                                       | C[ ] ... N[ ] |
| 1WYIA | <a href="#">CYS126(CA)</a> | 3.74 | <a href="#">ILE127(CA)</a>  | 1WYIA |                                                                                                                       | C[ ] ... C[ ] |
| 1WYIA | <a href="#">CYS126(CA)</a> | 4.68 | <a href="#">ILE127(C)</a>   | 1WYIA |                                                                                                                       |               |
| 1WYIA | <a href="#">CYS126(CA)</a> | 4.56 | <a href="#">ILE127(O)</a>   | 1WYIA |                                                                                                                       |               |
| 1WYIA | <a href="#">CYS126(CA)</a> | 4.59 | <a href="#">ILE127(CB)</a>  | 1WYIA |                                                                                                                       |               |
| 1WYIA | <a href="#">CYS126(CA)</a> | 4.71 | <a href="#">ILE127(CG1)</a> | 1WYIA |                                                                                                                       |               |
| 1WYIA | <a href="#">CYS126(CA)</a> | 4.61 | <a href="#">ILE127(CG2)</a> | 1WYIA |                                                                                                                       |               |
| 1WYIA | <a href="#">CYS126(C)</a>  | 2.38 | <a href="#">ILE127(CA)</a>  | 1WYIA |                                                                                                                       | C[ ] ... C[ ] |
| 1WYIA | <a href="#">CYS126(C)</a>  | 3.50 | <a href="#">ILE127(C)</a>   | 1WYIA |                                                                                                                       | C[ ] ... C[ ] |
| 1WYIA | <a href="#">CYS126(C)</a>  | 3.72 | <a href="#">ILE127(O)</a>   | 1WYIA |                                                                                                                       | C[ ] ... O[ ] |
| 1WYIA | <a href="#">CYS126(C)</a>  | 3.31 | <a href="#">ILE127(CB)</a>  | 1WYIA |                                                                                                                       | C[ ] ... C[ ] |
| 1WYIA | <a href="#">CYS126(C)</a>  | 3.80 | <a href="#">ILE127(CG1)</a> | 1WYIA |                                                                                                                       | C[ ] ... C[ ] |
| 1WYIA | <a href="#">CYS126(C)</a>  | 3.35 | <a href="#">ILE127(CG2)</a> | 1WYIA |                                                                                                                       | C[ ] ... C[ ] |
| 1WYIA | <a href="#">CYS126(C)</a>  | 4.79 | <a href="#">ILE127(CD1)</a> | 1WYIA |                                                                                                                       |               |
| 1WYIA | <a href="#">CYS126(O)</a>  | 2.24 | <a href="#">ILE127(N)</a>   | 1WYIA | [D-A-AA]:29.9° [A-D-DD]:91.3° d_planarity:0.6°<br>a_planarity:1.9°, bad a_angle(sp2)                                  | O[ ] ... N[ ] |
| 1WYIA | <a href="#">CYS126(O)</a>  | 2.69 | <a href="#">ILE127(CA)</a>  | 1WYIA |                                                                                                                       | O[ ] ... C[ ] |
| 1WYIA | <a href="#">CYS126(O)</a>  | 3.92 | <a href="#">ILE127(C)</a>   | 1WYIA |                                                                                                                       | O[ ] ... C[ ] |
| 1WYIA | <a href="#">CYS126(O)</a>  | 4.39 | <a href="#">ILE127(O)</a>   | 1WYIA |                                                                                                                       | O[ ] ... O[ ] |
| 1WYIA | <a href="#">CYS126(O)</a>  | 3.53 | <a href="#">ILE127(CB)</a>  | 1WYIA |                                                                                                                       | O[ ] ... C[ ] |
| 1WYIA | <a href="#">CYS126(O)</a>  | 4.39 | <a href="#">ILE127(CG1)</a> | 1WYIA |                                                                                                                       | O[ ] ... C[ ] |
| 1WYIA | <a href="#">CYS126(O)</a>  | 3.19 | <a href="#">ILE127(CG2)</a> | 1WYIA |                                                                                                                       | O[ ] ... C[ ] |
| 1WYIA | <a href="#">CYS126(CB)</a> | 3.24 | <a href="#">ILE127(N)</a>   | 1WYIA |                                                                                                                       | C[ ] ... N[ ] |
| 1WYIA | <a href="#">CYS126(CB)</a> | 4.45 | <a href="#">ILE127(CA)</a>  | 1WYIA |                                                                                                                       | C[ ] ... C[ ] |
| 1WYIA | <a href="#">CYS126(CB)</a> | 4.73 | <a href="#">ILE127(O)</a>   | 1WYIA |                                                                                                                       |               |
| 1WYIA | <a href="#">CYS126(SG)</a> | 4.82 | <a href="#">ILE127(N)</a>   | 1WYIA | [D-A-AA]:22.4° [A-D-DD]:151.4° d_planarity:58.1°,<br>maximum distance exceeded, bad a_angle(sp3)                      |               |
| 1WYIA | <a href="#">CYS126(C)</a>  | 4.62 | <a href="#">GLY128(N)</a>   | 1WYIA |                                                                                                                       |               |
| 1WYIA | <a href="#">CYS126(O)</a>  | 4.79 | <a href="#">GLY128(N)</a>   | 1WYIA | [D-A-AA]:74.7° [A-D-DD]:149.5° d_planarity:45.3°<br>a_planarity:18.1°, maximum distance exceeded,<br>bad a_angle(sp2) |               |
| 1WYIA | <a href="#">CYS126(N)</a>  | 4.74 | <a href="#">ILE150(CD1)</a> | 1WYIA |                                                                                                                       |               |
| 1WYIA | <a href="#">CYS126(C)</a>  | 4.92 | <a href="#">ILE150(CD1)</a> | 1WYIA |                                                                                                                       |               |
| 1WYIA | <a href="#">CYS126(O)</a>  | 4.52 | <a href="#">ILE150(CD1)</a> | 1WYIA |                                                                                                                       |               |
| 1WYIA | <a href="#">CYS126(N)</a>  | 4.77 | <a href="#">ALA163(N)</a>   | 1WYIA |                                                                                                                       |               |
| 1WYIA | <a href="#">CYS126(N)</a>  | 4.50 | <a href="#">ALA163(O)</a>   | 1WYIA | [D-A-AA]:128.4° [A-D-DD]:37.2° d_planarity:10.2°                                                                      | N[ ] ... O[ ] |

|       |                            |      |                             |       |                                                                   |               |
|-------|----------------------------|------|-----------------------------|-------|-------------------------------------------------------------------|---------------|
|       |                            |      |                             |       | a_planarity:-7.4°, maximum distance exceeded,<br>bad d_angle(sp2) |               |
| 1WYIA | <a href="#">CYS126(N)</a>  | 4.90 | <a href="#">ALA163(CB)</a>  | 1WYIA |                                                                   |               |
| 1WYIA | <a href="#">CYS126(CA)</a> | 4.57 | <a href="#">ALA163(N)</a>   | 1WYIA |                                                                   |               |
| 1WYIA | <a href="#">CYS126(CA)</a> | 4.76 | <a href="#">ALA163(CA)</a>  | 1WYIA |                                                                   |               |
| 1WYIA | <a href="#">CYS126(CA)</a> | 4.47 | <a href="#">ALA163(C)</a>   | 1WYIA |                                                                   | C[ ] ... C[ ] |
| 1WYIA | <a href="#">CYS126(CA)</a> | 3.45 | <a href="#">ALA163(O)</a>   | 1WYIA |                                                                   | C[ ] ... O[ ] |
| 1WYIA | <a href="#">CYS126(CA)</a> | 4.41 | <a href="#">ALA163(CB)</a>  | 1WYIA |                                                                   | C[ ] ... C[ ] |
| 1WYIA | <a href="#">CYS126(C)</a>  | 4.84 | <a href="#">ALA163(C)</a>   | 1WYIA |                                                                   |               |
| 1WYIA | <a href="#">CYS126(C)</a>  | 3.66 | <a href="#">ALA163(O)</a>   | 1WYIA |                                                                   | C[ ] ... O[ ] |
| 1WYIA | <a href="#">CYS126(O)</a>  | 4.87 | <a href="#">ALA163(O)</a>   | 1WYIA |                                                                   |               |
| 1WYIA | <a href="#">CYS126(CB)</a> | 4.15 | <a href="#">ALA163(O)</a>   | 1WYIA |                                                                   | C[ ] ... O[ ] |
| 1WYIA | <a href="#">CYS126(CB)</a> | 4.73 | <a href="#">ALA163(CB)</a>  | 1WYIA |                                                                   |               |
| 1WYIA | <a href="#">CYS126(SG)</a> | 4.83 | <a href="#">ALA163(O)</a>   | 1WYIA |                                                                   |               |
| 1WYIA | <a href="#">CYS126(SG)</a> | 4.27 | <a href="#">ALA163(CB)</a>  | 1WYIA |                                                                   | S[ ] ... C[ ] |
| 1WYIA | <a href="#">CYS126(CA)</a> | 4.06 | <a href="#">GLU165(OE1)</a> | 1WYIA |                                                                   | C[ ] ... O[-] |
| 1WYIA | <a href="#">CYS126(C)</a>  | 4.20 | <a href="#">GLU165(OE1)</a> | 1WYIA |                                                                   | C[ ] ... O[-] |
| 1WYIA | <a href="#">CYS126(O)</a>  | 4.78 | <a href="#">GLU165(OE1)</a> | 1WYIA |                                                                   |               |
| 1WYIA | <a href="#">CYS126(CB)</a> | 4.83 | <a href="#">GLU165(CG)</a>  | 1WYIA |                                                                   |               |
| 1WYIA | <a href="#">CYS126(CB)</a> | 4.08 | <a href="#">GLU165(CD)</a>  | 1WYIA |                                                                   | C[ ] ... C[ ] |
| 1WYIA | <a href="#">CYS126(CB)</a> | 2.94 | <a href="#">GLU165(OE1)</a> | 1WYIA |                                                                   | C[ ] ... O[-] |
| 1WYIA | <a href="#">CYS126(CB)</a> | 4.92 | <a href="#">GLU165(OE2)</a> | 1WYIA |                                                                   |               |
| 1WYIA | <a href="#">CYS126(SG)</a> | 4.37 | <a href="#">GLU165(CD)</a>  | 1WYIA |                                                                   | S[ ] ... C[ ] |
| 1WYIA | <a href="#">CYS126(SG)</a> | 3.55 | <a href="#">GLU165(OE1)</a> | 1WYIA | negative                                                          | S[ ] ... O[-] |
| 1WYIA | <a href="#">CYS126(SG)</a> | 3.90 | <a href="#">LEU230(CD2)</a> | 1WYIA |                                                                   | S[ ] ... C[ ] |

| chain1 | res1/atm1                  | distance | res2/atm2                   | chain2 | H-bonding                                                                                                              | Charge interaction |
|--------|----------------------------|----------|-----------------------------|--------|------------------------------------------------------------------------------------------------------------------------|--------------------|
| 1IRIA  | <a href="#">CYS404(N)</a>  | 4.99     | <a href="#">HIS336(ND1)</a> | 1IRIA  |                                                                                                                        |                    |
| 1IRIA  | <a href="#">CYS404(N)</a>  | 4.97     | <a href="#">HIS336(CE1)</a> | 1IRIA  |                                                                                                                        |                    |
| 1IRIA  | <a href="#">CYS404(C)</a>  | 4.93     | <a href="#">HIS336(CE1)</a> | 1IRIA  |                                                                                                                        |                    |
| 1IRIA  | <a href="#">CYS404(N)</a>  | 4.68     | <a href="#">ALA337(N)</a>   | 1IRIA  |                                                                                                                        |                    |
| 1IRIA  | <a href="#">CYS404(N)</a>  | 4.38     | <a href="#">ALA337(O)</a>   | 1IRIA  | [D-A-AA]:127.3° [A-D-DD]:37.7° d_planarity:33.4°<br>a_planarity:-22.9°, maximum distance exceeded,<br>bad d_angle(sp2) | N[ ] ... O[ ]      |
| 1IRIA  | <a href="#">CYS404(N)</a>  | 4.90     | <a href="#">ALA337(CB)</a>  | 1IRIA  |                                                                                                                        |                    |
| 1IRIA  | <a href="#">CYS404(CA)</a> | 4.33     | <a href="#">ALA337(N)</a>   | 1IRIA  |                                                                                                                        | C[ ] ... N[ ]      |
| 1IRIA  | <a href="#">CYS404(CA)</a> | 4.48     | <a href="#">ALA337(CA)</a>  | 1IRIA  |                                                                                                                        | C[ ] ... C[ ]      |
| 1IRIA  | <a href="#">CYS404(CA)</a> | 4.23     | <a href="#">ALA337(C)</a>   | 1IRIA  |                                                                                                                        | C[ ] ... C[ ]      |
| 1IRIA  | <a href="#">CYS404(CA)</a> | 3.35     | <a href="#">ALA337(O)</a>   | 1IRIA  |                                                                                                                        | C[ ] ... O[ ]      |
| 1IRIA  | <a href="#">CYS404(CA)</a> | 4.14     | <a href="#">ALA337(CB)</a>  | 1IRIA  |                                                                                                                        | C[ ] ... C[ ]      |
| 1IRIA  | <a href="#">CYS404(C)</a>  | 4.67     | <a href="#">ALA337(C)</a>   | 1IRIA  |                                                                                                                        |                    |
| 1IRIA  | <a href="#">CYS404(C)</a>  | 3.56     | <a href="#">ALA337(O)</a>   | 1IRIA  |                                                                                                                        | C[ ] ... O[ ]      |
| 1IRIA  | <a href="#">CYS404(O)</a>  | 4.77     | <a href="#">ALA337(O)</a>   | 1IRIA  |                                                                                                                        |                    |
| 1IRIA  | <a href="#">CYS404(CB)</a> | 4.86     | <a href="#">ALA337(C)</a>   | 1IRIA  |                                                                                                                        |                    |
| 1IRIA  | <a href="#">CYS404(CB)</a> | 4.21     | <a href="#">ALA337(O)</a>   | 1IRIA  |                                                                                                                        | C[ ] ... O[ ]      |

|       |                            |      |                             |       |                                                                                                |               |
|-------|----------------------------|------|-----------------------------|-------|------------------------------------------------------------------------------------------------|---------------|
| IIRIA | <a href="#">CYS404(CB)</a> | 4.23 | <a href="#">ALA337(CB)</a>  | IIRIA |                                                                                                | C[ ] ... C[ ] |
| IIRIA | <a href="#">CYS404(SG)</a> | 4.82 | <a href="#">ALA337(CA)</a>  | IIRIA |                                                                                                |               |
| IIRIA | <a href="#">CYS404(SG)</a> | 4.90 | <a href="#">ALA337(O)</a>   | IIRIA |                                                                                                |               |
| IIRIA | <a href="#">CYS404(SG)</a> | 3.62 | <a href="#">ALA337(CB)</a>  | IIRIA |                                                                                                | S[ ] ... C[ ] |
| IIRIA | <a href="#">CYS404(CB)</a> | 4.94 | <a href="#">LEU339(CG)</a>  | IIRIA |                                                                                                |               |
| IIRIA | <a href="#">CYS404(CB)</a> | 4.04 | <a href="#">LEU339(CD1)</a> | IIRIA |                                                                                                | C[ ] ... C[ ] |
| IIRIA | <a href="#">CYS404(SG)</a> | 4.82 | <a href="#">LEU339(CG)</a>  | IIRIA |                                                                                                |               |
| IIRIA | <a href="#">CYS404(SG)</a> | 3.70 | <a href="#">LEU339(CD1)</a> | IIRIA |                                                                                                | S[ ] ... C[ ] |
| IIRIA | <a href="#">CYS404(SG)</a> | 4.81 | <a href="#">ILE395(CG1)</a> | IIRIA |                                                                                                |               |
| IIRIA | <a href="#">CYS404(SG)</a> | 4.36 | <a href="#">ILE395(CG2)</a> | IIRIA |                                                                                                | S[ ] ... C[ ] |
| IIRIA | <a href="#">CYS404(SG)</a> | 4.13 | <a href="#">ILE395(CD1)</a> | IIRIA |                                                                                                | S[ ] ... C[ ] |
| IIRIA | <a href="#">CYS404(N)</a>  | 3.76 | <a href="#">ILE402(C)</a>   | IIRIA |                                                                                                | N[ ] ... C[ ] |
| IIRIA | <a href="#">CYS404(N)</a>  | 3.24 | <a href="#">ILE402(O)</a>   | IIRIA | [D-A-AA]:104.9° [A-D-DD]:115.8° d_planarity:67.8°<br>a_planarity:25.7°, <b>bad d_planarity</b> | N[ ] ... O[ ] |
| IIRIA | <a href="#">CYS404(CA)</a> | 4.76 | <a href="#">ILE402(C)</a>   | IIRIA |                                                                                                |               |
| IIRIA | <a href="#">CYS404(CA)</a> | 4.08 | <a href="#">ILE402(O)</a>   | IIRIA |                                                                                                | C[ ] ... O[ ] |
| IIRIA | <a href="#">CYS404(CB)</a> | 4.98 | <a href="#">ILE402(C)</a>   | IIRIA |                                                                                                |               |
| IIRIA | <a href="#">CYS404(CB)</a> | 4.00 | <a href="#">ILE402(O)</a>   | IIRIA |                                                                                                | C[ ] ... O[ ] |
| IIRIA | <a href="#">CYS404(SG)</a> | 4.41 | <a href="#">ILE402(C)</a>   | IIRIA |                                                                                                | S[ ] ... C[ ] |
| IIRIA | <a href="#">CYS404(SG)</a> | 3.37 | <a href="#">ILE402(O)</a>   | IIRIA |                                                                                                | S[ ] ... O[ ] |
| IIRIA | <a href="#">CYS404(SG)</a> | 4.71 | <a href="#">ILE402(CB)</a>  | IIRIA |                                                                                                |               |
| IIRIA | <a href="#">CYS404(SG)</a> | 4.12 | <a href="#">ILE402(CG2)</a> | IIRIA |                                                                                                | S[ ] ... C[ ] |
| IIRIA | <a href="#">CYS404(N)</a>  | 3.50 | <a href="#">PRO403(N)</a>   | IIRIA |                                                                                                | N[ ] ... N[ ] |
| IIRIA | <a href="#">CYS404(N)</a>  | 2.42 | <a href="#">PRO403(CA)</a>  | IIRIA |                                                                                                | N[ ] ... C[ ] |
| IIRIA | <a href="#">CYS404(N)</a>  | 2.26 | <a href="#">PRO403(O)</a>   | IIRIA | [D-A-AA]:29.3° [A-D-DD]:95.9° d_planarity:2.1°<br>a_planarity:0.9°, <b>bad a_angle(sp2)</b>    | N[ ] ... O[ ] |
| IIRIA | <a href="#">CYS404(N)</a>  | 3.41 | <a href="#">PRO403(CB)</a>  | IIRIA |                                                                                                | N[ ] ... C[ ] |
| IIRIA | <a href="#">CYS404(N)</a>  | 4.71 | <a href="#">PRO403(CG)</a>  | IIRIA |                                                                                                |               |
| IIRIA | <a href="#">CYS404(N)</a>  | 4.67 | <a href="#">PRO403(CD)</a>  | IIRIA |                                                                                                |               |
| IIRIA | <a href="#">CYS404(CA)</a> | 4.71 | <a href="#">PRO403(N)</a>   | IIRIA |                                                                                                |               |
| IIRIA | <a href="#">CYS404(CA)</a> | 3.80 | <a href="#">PRO403(CA)</a>  | IIRIA |                                                                                                | C[ ] ... C[ ] |
| IIRIA | <a href="#">CYS404(CA)</a> | 2.43 | <a href="#">PRO403(C)</a>   | IIRIA |                                                                                                | C[ ] ... C[ ] |
| IIRIA | <a href="#">CYS404(CA)</a> | 2.80 | <a href="#">PRO403(O)</a>   | IIRIA |                                                                                                | C[ ] ... O[ ] |
| IIRIA | <a href="#">CYS404(CA)</a> | 4.72 | <a href="#">PRO403(CB)</a>  | IIRIA |                                                                                                |               |
| IIRIA | <a href="#">CYS404(C)</a>  | 4.78 | <a href="#">PRO403(CA)</a>  | IIRIA |                                                                                                |               |
| IIRIA | <a href="#">CYS404(C)</a>  | 3.58 | <a href="#">PRO403(C)</a>   | IIRIA |                                                                                                | C[ ] ... C[ ] |
| IIRIA | <a href="#">CYS404(C)</a>  | 4.03 | <a href="#">PRO403(O)</a>   | IIRIA |                                                                                                | C[ ] ... O[ ] |
| IIRIA | <a href="#">CYS404(O)</a>  | 4.10 | <a href="#">PRO403(C)</a>   | IIRIA |                                                                                                | O[ ] ... C[ ] |
| IIRIA | <a href="#">CYS404(O)</a>  | 4.82 | <a href="#">PRO403(O)</a>   | IIRIA |                                                                                                |               |
| IIRIA | <a href="#">CYS404(CB)</a> | 4.62 | <a href="#">PRO403(CA)</a>  | IIRIA |                                                                                                |               |
| IIRIA | <a href="#">CYS404(CB)</a> | 3.43 | <a href="#">PRO403(C)</a>   | IIRIA |                                                                                                | C[ ] ... C[ ] |
| IIRIA | <a href="#">CYS404(CB)</a> | 3.82 | <a href="#">PRO403(O)</a>   | IIRIA |                                                                                                | C[ ] ... O[ ] |
| IIRIA | <a href="#">CYS404(SG)</a> | 4.96 | <a href="#">PRO403(CA)</a>  | IIRIA |                                                                                                |               |
| IIRIA | <a href="#">CYS404(SG)</a> | 3.91 | <a href="#">PRO403(C)</a>   | IIRIA |                                                                                                | S[ ] ... C[ ] |
| IIRIA | <a href="#">CYS404(SG)</a> | 4.02 | <a href="#">PRO403(O)</a>   | IIRIA |                                                                                                | S[ ] ... O[ ] |
| IIRIA | <a href="#">CYS404(N)</a>  | 3.54 | <a href="#">ASP405(N)</a>   | IIRIA |                                                                                                | N[ ] ... N[ ] |
| IIRIA | <a href="#">CYS404(N)</a>  | 4.85 | <a href="#">ASP405(CA)</a>  | IIRIA |                                                                                                |               |
| IIRIA | <a href="#">CYS404(CA)</a> | 2.43 | <a href="#">ASP405(N)</a>   | IIRIA |                                                                                                | C[ ] ... N[ ] |
| IIRIA | <a href="#">CYS404(CA)</a> | 3.81 | <a href="#">ASP405(CA)</a>  | IIRIA |                                                                                                | C[ ] ... C[ ] |

|       |                            |      |                             |       |                                                                                                                                                       |               |
|-------|----------------------------|------|-----------------------------|-------|-------------------------------------------------------------------------------------------------------------------------------------------------------|---------------|
| IIRIA | <a href="#">CYS404(CA)</a> | 4.54 | <a href="#">ASP405(C)</a>   | IIRIA |                                                                                                                                                       |               |
| IIRIA | <a href="#">CYS404(CA)</a> | 4.96 | <a href="#">ASP405(O)</a>   | IIRIA |                                                                                                                                                       |               |
| IIRIA | <a href="#">CYS404(CA)</a> | 4.83 | <a href="#">ASP405(CB)</a>  | IIRIA |                                                                                                                                                       |               |
| IIRIA | <a href="#">CYS404(CA)</a> | 4.70 | <a href="#">ASP405(OD1)</a> | IIRIA |                                                                                                                                                       |               |
| IIRIA | <a href="#">CYS404(C)</a>  | 2.47 | <a href="#">ASP405(CA)</a>  | IIRIA |                                                                                                                                                       | C[ ] ... C[ ] |
| IIRIA | <a href="#">CYS404(C)</a>  | 3.37 | <a href="#">ASP405(C)</a>   | IIRIA |                                                                                                                                                       | C[ ] ... C[ ] |
| IIRIA | <a href="#">CYS404(C)</a>  | 4.07 | <a href="#">ASP405(O)</a>   | IIRIA |                                                                                                                                                       | C[ ] ... O[ ] |
| IIRIA | <a href="#">CYS404(C)</a>  | 3.63 | <a href="#">ASP405(CB)</a>  | IIRIA |                                                                                                                                                       | C[ ] ... C[ ] |
| IIRIA | <a href="#">CYS404(C)</a>  | 3.98 | <a href="#">ASP405(CG)</a>  | IIRIA |                                                                                                                                                       | C[ ] ... C[ ] |
| IIRIA | <a href="#">CYS404(C)</a>  | 3.51 | <a href="#">ASP405(OD1)</a> | IIRIA |                                                                                                                                                       | C[ ] ... O[-] |
| IIRIA | <a href="#">CYS404(O)</a>  | 2.26 | <a href="#">ASP405(N)</a>   | IIRIA | [D-A-AA]:29.3° [A-D-DD]:97.1° d_planarity:3.4°<br>a_planarity:4.1°, <b>bad a_angle(sp2)</b>                                                           | O[ ] ... N[ ] |
| IIRIA | <a href="#">CYS404(O)</a>  | 2.84 | <a href="#">ASP405(CA)</a>  | IIRIA |                                                                                                                                                       | O[ ] ... C[ ] |
| IIRIA | <a href="#">CYS404(O)</a>  | 3.71 | <a href="#">ASP405(C)</a>   | IIRIA |                                                                                                                                                       | O[ ] ... C[ ] |
| IIRIA | <a href="#">CYS404(O)</a>  | 4.66 | <a href="#">ASP405(O)</a>   | IIRIA |                                                                                                                                                       |               |
| IIRIA | <a href="#">CYS404(O)</a>  | 4.12 | <a href="#">ASP405(CB)</a>  | IIRIA |                                                                                                                                                       | O[ ] ... C[ ] |
| IIRIA | <a href="#">CYS404(O)</a>  | 4.32 | <a href="#">ASP405(CG)</a>  | IIRIA |                                                                                                                                                       | O[ ] ... C[ ] |
| IIRIA | <a href="#">CYS404(O)</a>  | 3.60 | <a href="#">ASP405(OD1)</a> | IIRIA |                                                                                                                                                       | O[ ] ... O[-] |
| IIRIA | <a href="#">CYS404(CB)</a> | 3.29 | <a href="#">ASP405(N)</a>   | IIRIA |                                                                                                                                                       | C[ ] ... N[ ] |
| IIRIA | <a href="#">CYS404(CB)</a> | 4.47 | <a href="#">ASP405(CA)</a>  | IIRIA |                                                                                                                                                       | C[ ] ... C[ ] |
| IIRIA | <a href="#">CYS404(CB)</a> | 4.74 | <a href="#">ASP405(C)</a>   | IIRIA |                                                                                                                                                       |               |
| IIRIA | <a href="#">CYS404(SG)</a> | 4.84 | <a href="#">ASP405(N)</a>   | IIRIA | [D-A-AA]:24.2° [A-D-DD]:144.3° d_planarity:68.2°,<br><b>maximum distance exceeded, bad a_angle(sp3), bad d_planarity</b>                              |               |
| IIRIA | <a href="#">CYS404(C)</a>  | 3.93 | <a href="#">PHE406(N)</a>   | IIRIA |                                                                                                                                                       | C[ ] ... N[ ] |
| IIRIA | <a href="#">CYS404(C)</a>  | 4.53 | <a href="#">PHE406(CD1)</a> | IIRIA |                                                                                                                                                       |               |
| IIRIA | <a href="#">CYS404(C)</a>  | 4.95 | <a href="#">PHE406(CE1)</a> | IIRIA |                                                                                                                                                       |               |
| IIRIA | <a href="#">CYS404(O)</a>  | 3.89 | <a href="#">PHE406(N)</a>   | IIRIA | [D-A-AA]:82.7° [A-D-DD]:150.4° d_planarity:-65.0°<br>a_planarity:40.8°, <b>maximum distance exceeded,</b><br><b>bad a_angle(sp2), bad d_planarity</b> | O[ ] ... N[ ] |
| IIRIA | <a href="#">CYS404(O)</a>  | 4.35 | <a href="#">PHE406(CD1)</a> | IIRIA |                                                                                                                                                       | O[ ] ... C[ ] |
| IIRIA | <a href="#">CYS404(O)</a>  | 4.88 | <a href="#">PHE406(CE1)</a> | IIRIA |                                                                                                                                                       |               |
| IIRIA | <a href="#">CYS404(CB)</a> | 4.11 | <a href="#">PHE406(CD1)</a> | IIRIA |                                                                                                                                                       | C[ ] ... C[ ] |
| IIRIA | <a href="#">CYS404(CB)</a> | 3.82 | <a href="#">PHE406(CE1)</a> | IIRIA |                                                                                                                                                       | C[ ] ... C[ ] |
| IIRIA | <a href="#">CYS404(CB)</a> | 4.96 | <a href="#">PHE406(CZ)</a>  | IIRIA |                                                                                                                                                       |               |
| IIRIA | <a href="#">CYS404(SG)</a> | 4.39 | <a href="#">PHE406(CE1)</a> | IIRIA |                                                                                                                                                       | S[ ] ... C[ ] |
| IIRIA | <a href="#">CYS404(N)</a>  | 4.71 | <a href="#">PRO473(C)</a>   | IIRIA |                                                                                                                                                       |               |
| IIRIA | <a href="#">CYS404(N)</a>  | 3.71 | <a href="#">PRO473(O)</a>   | IIRIA | [D-A-AA]:138.7° [A-D-DD]:122.7° d_planarity:-30.3°<br>a_planarity:32.1°, <b>maximum distance exceeded</b>                                             | N[ ] ... O[ ] |
| IIRIA | <a href="#">CYS404(CA)</a> | 4.65 | <a href="#">PRO473(O)</a>   | IIRIA |                                                                                                                                                       |               |
| IIRIA | <a href="#">CYS404(O)</a>  | 4.92 | <a href="#">PRO473(C)</a>   | IIRIA |                                                                                                                                                       |               |
| IIRIA | <a href="#">CYS404(O)</a>  | 4.49 | <a href="#">PRO473(O)</a>   | IIRIA |                                                                                                                                                       | O[ ] ... O[ ] |
| IIRIA | <a href="#">CYS404(CB)</a> | 4.54 | <a href="#">PRO473(O)</a>   | IIRIA |                                                                                                                                                       |               |
| IIRIA | <a href="#">CYS404(N)</a>  | 4.39 | <a href="#">THR474(CA)</a>  | IIRIA |                                                                                                                                                       | N[ ] ... C[ ] |
| IIRIA | <a href="#">CYS404(N)</a>  | 4.92 | <a href="#">THR474(CG2)</a> | IIRIA |                                                                                                                                                       |               |
| IIRIA | <a href="#">CYS404(CA)</a> | 4.73 | <a href="#">THR474(CA)</a>  | IIRIA |                                                                                                                                                       |               |
| IIRIA | <a href="#">CYS404(CA)</a> | 4.89 | <a href="#">THR474(CG2)</a> | IIRIA |                                                                                                                                                       |               |
| IIRIA | <a href="#">CYS404(C)</a>  | 4.27 | <a href="#">THR474(CA)</a>  | IIRIA |                                                                                                                                                       | C[ ] ... C[ ] |
| IIRIA | <a href="#">CYS404(C)</a>  | 4.64 | <a href="#">THR474(C)</a>   | IIRIA |                                                                                                                                                       |               |
| IIRIA | <a href="#">CYS404(C)</a>  | 4.55 | <a href="#">THR474(CB)</a>  | IIRIA |                                                                                                                                                       |               |
| IIRIA | <a href="#">CYS404(C)</a>  | 4.83 | <a href="#">THR474(CG2)</a> | IIRIA |                                                                                                                                                       |               |

|       |                            |      |                             |       |                                                                                                                       |                 |
|-------|----------------------------|------|-----------------------------|-------|-----------------------------------------------------------------------------------------------------------------------|-----------------|
| IIRIA | <a href="#">CYS404(O)</a>  | 4.47 | <a href="#">THR474(N)</a>   | IIRIA | [D-A-AA]:141.1° [A-D-DD]:21.7° d_planarity:25.8°<br>a_planarity:-5.0°, maximum distance exceeded,<br>bad d_angle(sp2) | O [ ] ... N [ ] |
| IIRIA | <a href="#">CYS404(O)</a>  | 3.17 | <a href="#">THR474(CA)</a>  | IIRIA |                                                                                                                       | O [ ] ... C [ ] |
| IIRIA | <a href="#">CYS404(O)</a>  | 3.43 | <a href="#">THR474(C)</a>   | IIRIA |                                                                                                                       | O [ ] ... C [ ] |
| IIRIA | <a href="#">CYS404(O)</a>  | 4.63 | <a href="#">THR474(O)</a>   | IIRIA |                                                                                                                       |                 |
| IIRIA | <a href="#">CYS404(O)</a>  | 3.53 | <a href="#">THR474(CB)</a>  | IIRIA |                                                                                                                       | O [ ] ... C [ ] |
| IIRIA | <a href="#">CYS404(O)</a>  | 4.85 | <a href="#">THR474(OG1)</a> | IIRIA | [D-A-AA]:148.5° [A-D-DD]:19.1° a_planarity:-54.9°,<br>maximum distance exceeded, bad d_angle(sp3)                     |                 |
| IIRIA | <a href="#">CYS404(O)</a>  | 4.08 | <a href="#">THR474(CG2)</a> | IIRIA |                                                                                                                       | O [ ] ... C [ ] |
| IIRIA | <a href="#">CYS404(CB)</a> | 4.68 | <a href="#">THR474(CA)</a>  | IIRIA |                                                                                                                       |                 |
| IIRIA | <a href="#">CYS404(CB)</a> | 4.57 | <a href="#">THR474(CB)</a>  | IIRIA |                                                                                                                       |                 |
| IIRIA | <a href="#">CYS404(CB)</a> | 4.04 | <a href="#">THR474(CG2)</a> | IIRIA |                                                                                                                       | C [ ] ... C [ ] |
| IIRIA | <a href="#">CYS404(SG)</a> | 4.91 | <a href="#">THR474(CG2)</a> | IIRIA |                                                                                                                       |                 |
| IIRIA | <a href="#">CYS404(C)</a>  | 3.93 | <a href="#">ASN475(N)</a>   | IIRIA |                                                                                                                       | C [ ] ... N [ ] |
| IIRIA | <a href="#">CYS404(C)</a>  | 4.88 | <a href="#">ASN475(CA)</a>  | IIRIA |                                                                                                                       |                 |
| IIRIA | <a href="#">CYS404(C)</a>  | 4.36 | <a href="#">ASN475(O)</a>   | IIRIA |                                                                                                                       | C [ ] ... O [ ] |
| IIRIA | <a href="#">CYS404(C)</a>  | 4.87 | <a href="#">ASN475(CB)</a>  | IIRIA |                                                                                                                       |                 |
| IIRIA | <a href="#">CYS404(O)</a>  | 2.74 | <a href="#">ASN475(N)</a>   | IIRIA | <b>H-bond</b> [D-A-AA]:163.1° [A-D-DD]:128.2° d_planarity:-1.0°<br>a_planarity:31.6°                                  | O [ ] ... N [ ] |
| IIRIA | <a href="#">CYS404(O)</a>  | 3.81 | <a href="#">ASN475(CA)</a>  | IIRIA |                                                                                                                       | O [ ] ... C [ ] |
| IIRIA | <a href="#">CYS404(O)</a>  | 4.13 | <a href="#">ASN475(C)</a>   | IIRIA |                                                                                                                       | O [ ] ... C [ ] |
| IIRIA | <a href="#">CYS404(O)</a>  | 3.54 | <a href="#">ASN475(O)</a>   | IIRIA |                                                                                                                       | O [ ] ... O [ ] |
| IIRIA | <a href="#">CYS404(O)</a>  | 4.05 | <a href="#">ASN475(CB)</a>  | IIRIA |                                                                                                                       | O [ ] ... C [ ] |
| IIRIA | <a href="#">CYS404(O)</a>  | 4.65 | <a href="#">ASN475(CG)</a>  | IIRIA |                                                                                                                       |                 |
| IIRIA | <a href="#">CYS404(O)</a>  | 4.65 | <a href="#">ASN475(OD1)</a> | IIRIA |                                                                                                                       |                 |

| chain1 | res1/atm1                 | distance | res2/atm2                  | chain2 | H-bonding                                                                                                           | Charge interaction |
|--------|---------------------------|----------|----------------------------|--------|---------------------------------------------------------------------------------------------------------------------|--------------------|
| 2DFDA  | <a href="#">CYS71(C)</a>  | 4.88     | <a href="#">ALA10(CB)</a>  | 2DFDA  |                                                                                                                     |                    |
| 2DFDA  | <a href="#">CYS71(O)</a>  | 4.09     | <a href="#">ALA10(CB)</a>  | 2DFDA  |                                                                                                                     | O [ ] ... C [ ]    |
| 2DFDA  | <a href="#">CYS71(SG)</a> | 4.99     | <a href="#">ALA10(CA)</a>  | 2DFDA  |                                                                                                                     |                    |
| 2DFDA  | <a href="#">CYS71(SG)</a> | 4.19     | <a href="#">ALA10(CB)</a>  | 2DFDA  |                                                                                                                     | S [ ] ... C [ ]    |
| 2DFDA  | <a href="#">CYS71(SG)</a> | 4.22     | <a href="#">LEU12(CD2)</a> | 2DFDA  |                                                                                                                     | S [ ] ... C [ ]    |
| 2DFDA  | <a href="#">CYS71(O)</a>  | 4.51     | <a href="#">ARG34(NH1)</a> | 2DFDA  | [D-A-AA]:132.8° [A-D-DD]:118.5° d_planarity:-66.0°<br>a_planarity:71.3°, maximum distance exceeded, bad d_planarity |                    |
| 2DFDA  | <a href="#">CYS71(CA)</a> | 4.28     | <a href="#">THR36(CB)</a>  | 2DFDA  |                                                                                                                     | C [ ] ... C [ ]    |
| 2DFDA  | <a href="#">CYS71(CA)</a> | 4.31     | <a href="#">THR36(OG1)</a> | 2DFDA  |                                                                                                                     | C [ ] ... O [ ]    |
| 2DFDA  | <a href="#">CYS71(CA)</a> | 4.76     | <a href="#">THR36(CG2)</a> | 2DFDA  |                                                                                                                     |                    |
| 2DFDA  | <a href="#">CYS71(C)</a>  | 4.25     | <a href="#">THR36(CB)</a>  | 2DFDA  |                                                                                                                     | C [ ] ... C [ ]    |
| 2DFDA  | <a href="#">CYS71(C)</a>  | 3.79     | <a href="#">THR36(OG1)</a> | 2DFDA  |                                                                                                                     | C [ ] ... O [ ]    |
| 2DFDA  | <a href="#">CYS71(C)</a>  | 4.73     | <a href="#">THR36(CG2)</a> | 2DFDA  |                                                                                                                     |                    |
| 2DFDA  | <a href="#">CYS71(O)</a>  | 4.86     | <a href="#">THR36(CA)</a>  | 2DFDA  |                                                                                                                     |                    |
| 2DFDA  | <a href="#">CYS71(O)</a>  | 3.41     | <a href="#">THR36(CB)</a>  | 2DFDA  |                                                                                                                     | O [ ] ... C [ ]    |
| 2DFDA  | <a href="#">CYS71(O)</a>  | 2.70     | <a href="#">THR36(OG1)</a> | 2DFDA  | <b>H-bond</b> [D-A-AA]:144.4° [A-D-DD]:106.8° a_planarity:-25.2°                                                    | O [ ] ... O [ ]    |
| 2DFDA  | <a href="#">CYS71(O)</a>  | 3.90     | <a href="#">THR36(CG2)</a> | 2DFDA  |                                                                                                                     | O [ ] ... C [ ]    |
| 2DFDA  | <a href="#">CYS71(CB)</a> | 4.55     | <a href="#">THR36(CB)</a>  | 2DFDA  |                                                                                                                     |                    |

|       |                            |      |                             |       |                                                                                                                                          |               |
|-------|----------------------------|------|-----------------------------|-------|------------------------------------------------------------------------------------------------------------------------------------------|---------------|
| 2DFDA | <a href="#">CYS71</a> (CB) | 4.61 | <a href="#">THR36</a> (OG1) | 2DFDA |                                                                                                                                          |               |
| 2DFDA | <a href="#">CYS71</a> (SG) | 4.29 | <a href="#">THR36</a> (CA)  | 2DFDA |                                                                                                                                          | S[ ] ... C[ ] |
| 2DFDA | <a href="#">CYS71</a> (SG) | 3.76 | <a href="#">THR36</a> (C)   | 2DFDA |                                                                                                                                          | S[ ] ... C[ ] |
| 2DFDA | <a href="#">CYS71</a> (SG) | 3.79 | <a href="#">THR36</a> (O)   | 2DFDA |                                                                                                                                          | S[ ] ... O[ ] |
| 2DFDA | <a href="#">CYS71</a> (SG) | 3.64 | <a href="#">THR36</a> (CB)  | 2DFDA |                                                                                                                                          | S[ ] ... C[ ] |
| 2DFDA | <a href="#">CYS71</a> (SG) | 3.58 | <a href="#">THR36</a> (OG1) | 2DFDA | <b>H-bond</b> [D-A-AA]:113.3° [A-D-DD]:80.7°                                                                                             | S[ ] ... O[ ] |
| 2DFDA | <a href="#">CYS71</a> (SG) | 4.91 | <a href="#">THR36</a> (CG2) | 2DFDA |                                                                                                                                          |               |
| 2DFDA | <a href="#">CYS71</a> (CB) | 5.00 | <a href="#">LEU37</a> (O)   | 2DFDA |                                                                                                                                          |               |
| 2DFDA | <a href="#">CYS71</a> (SG) | 4.03 | <a href="#">LEU37</a> (N)   | 2DFDA | [D-A-AA]:134.2° [A-D-DD]:96.0° d_planarity:68.6°, <b>maximum distance exceeded, bad d_planarity</b>                                      | S[ ] ... N[ ] |
| 2DFDA | <a href="#">CYS71</a> (SG) | 4.43 | <a href="#">LEU37</a> (CA)  | 2DFDA |                                                                                                                                          | S[ ] ... C[ ] |
| 2DFDA | <a href="#">CYS71</a> (SG) | 3.96 | <a href="#">LEU37</a> (C)   | 2DFDA |                                                                                                                                          | S[ ] ... C[ ] |
| 2DFDA | <a href="#">CYS71</a> (SG) | 4.14 | <a href="#">LEU37</a> (O)   | 2DFDA |                                                                                                                                          | S[ ] ... O[ ] |
| 2DFDA | <a href="#">CYS71</a> (CB) | 4.35 | <a href="#">TYR38</a> (CB)  | 2DFDA |                                                                                                                                          | C[ ] ... C[ ] |
| 2DFDA | <a href="#">CYS71</a> (CB) | 4.84 | <a href="#">TYR38</a> (CG)  | 2DFDA |                                                                                                                                          |               |
| 2DFDA | <a href="#">CYS71</a> (CB) | 4.67 | <a href="#">TYR38</a> (CD1) | 2DFDA |                                                                                                                                          |               |
| 2DFDA | <a href="#">CYS71</a> (SG) | 4.07 | <a href="#">TYR38</a> (N)   | 2DFDA | [D-A-AA]:125.3° [A-D-DD]:90.7° d_planarity:73.5°, <b>maximum distance exceeded, bad d_planarity</b>                                      | S[ ] ... N[ ] |
| 2DFDA | <a href="#">CYS71</a> (SG) | 4.35 | <a href="#">TYR38</a> (CA)  | 2DFDA |                                                                                                                                          | S[ ] ... C[ ] |
| 2DFDA | <a href="#">CYS71</a> (SG) | 3.67 | <a href="#">TYR38</a> (CB)  | 2DFDA |                                                                                                                                          | S[ ] ... C[ ] |
| 2DFDA | <a href="#">CYS71</a> (SG) | 4.67 | <a href="#">TYR38</a> (CG)  | 2DFDA |                                                                                                                                          |               |
| 2DFDA | <a href="#">CYS71</a> (SG) | 4.94 | <a href="#">TYR38</a> (CD1) | 2DFDA |                                                                                                                                          |               |
| 2DFDA | <a href="#">CYS71</a> (N)  | 4.99 | <a href="#">TYR62</a> (CB)  | 2DFDA |                                                                                                                                          |               |
| 2DFDA | <a href="#">CYS71</a> (N)  | 4.16 | <a href="#">TYR62</a> (CG)  | 2DFDA |                                                                                                                                          | N[ ] ... C[ ] |
| 2DFDA | <a href="#">CYS71</a> (N)  | 3.98 | <a href="#">TYR62</a> (CD1) | 2DFDA |                                                                                                                                          | N[ ] ... C[ ] |
| 2DFDA | <a href="#">CYS71</a> (N)  | 4.27 | <a href="#">TYR62</a> (CD2) | 2DFDA |                                                                                                                                          | N[ ] ... C[ ] |
| 2DFDA | <a href="#">CYS71</a> (N)  | 3.88 | <a href="#">TYR62</a> (CE1) | 2DFDA |                                                                                                                                          | N[ ] ... C[ ] |
| 2DFDA | <a href="#">CYS71</a> (N)  | 4.19 | <a href="#">TYR62</a> (CE2) | 2DFDA |                                                                                                                                          | N[ ] ... C[ ] |
| 2DFDA | <a href="#">CYS71</a> (N)  | 3.98 | <a href="#">TYR62</a> (CZ)  | 2DFDA |                                                                                                                                          | N[ ] ... C[ ] |
| 2DFDA | <a href="#">CYS71</a> (N)  | 4.56 | <a href="#">TYR62</a> (OH)  | 2DFDA | [D-A-AA]:56.7° [A-D-DD]:78.0° d_planarity:53.1° a_planarity:-82.8°, <b>maximum distance exceeded, bad a_angle(sp2), bad d_angle(sp2)</b> |               |
| 2DFDA | <a href="#">CYS71</a> (CA) | 4.85 | <a href="#">TYR62</a> (CB)  | 2DFDA |                                                                                                                                          |               |
| 2DFDA | <a href="#">CYS71</a> (CA) | 4.02 | <a href="#">TYR62</a> (CG)  | 2DFDA |                                                                                                                                          | C[ ] ... C[ ] |
| 2DFDA | <a href="#">CYS71</a> (CA) | 4.28 | <a href="#">TYR62</a> (CD1) | 2DFDA |                                                                                                                                          | C[ ] ... C[ ] |
| 2DFDA | <a href="#">CYS71</a> (CA) | 3.70 | <a href="#">TYR62</a> (CD2) | 2DFDA |                                                                                                                                          | C[ ] ... C[ ] |
| 2DFDA | <a href="#">CYS71</a> (CA) | 4.21 | <a href="#">TYR62</a> (CE1) | 2DFDA |                                                                                                                                          | C[ ] ... C[ ] |
| 2DFDA | <a href="#">CYS71</a> (CA) | 3.63 | <a href="#">TYR62</a> (CE2) | 2DFDA |                                                                                                                                          | C[ ] ... C[ ] |
| 2DFDA | <a href="#">CYS71</a> (CA) | 3.88 | <a href="#">TYR62</a> (CZ)  | 2DFDA |                                                                                                                                          | C[ ] ... C[ ] |
| 2DFDA | <a href="#">CYS71</a> (CA) | 4.49 | <a href="#">TYR62</a> (OH)  | 2DFDA |                                                                                                                                          | C[ ] ... O[ ] |
| 2DFDA | <a href="#">CYS71</a> (C)  | 4.80 | <a href="#">TYR62</a> (CE2) | 2DFDA |                                                                                                                                          |               |
| 2DFDA | <a href="#">CYS71</a> (O)  | 4.94 | <a href="#">TYR62</a> (CE2) | 2DFDA |                                                                                                                                          |               |
| 2DFDA | <a href="#">CYS71</a> (CB) | 4.00 | <a href="#">TYR62</a> (CB)  | 2DFDA |                                                                                                                                          | C[ ] ... C[ ] |
| 2DFDA | <a href="#">CYS71</a> (CB) | 3.61 | <a href="#">TYR62</a> (CG)  | 2DFDA |                                                                                                                                          | C[ ] ... C[ ] |
| 2DFDA | <a href="#">CYS71</a> (CB) | 4.27 | <a href="#">TYR62</a> (CD1) | 2DFDA |                                                                                                                                          | C[ ] ... C[ ] |
| 2DFDA | <a href="#">CYS71</a> (CB) | 3.41 | <a href="#">TYR62</a> (CD2) | 2DFDA |                                                                                                                                          | C[ ] ... C[ ] |
| 2DFDA | <a href="#">CYS71</a> (CB) | 4.66 | <a href="#">TYR62</a> (CE1) | 2DFDA |                                                                                                                                          |               |
| 2DFDA | <a href="#">CYS71</a> (CB) | 3.89 | <a href="#">TYR62</a> (CE2) | 2DFDA |                                                                                                                                          | C[ ] ... C[ ] |
| 2DFDA | <a href="#">CYS71</a> (CB) | 4.47 | <a href="#">TYR62</a> (CZ)  | 2DFDA |                                                                                                                                          | C[ ] ... C[ ] |
| 2DFDA | <a href="#">CYS71</a> (SG) | 4.61 | <a href="#">TYR62</a> (CB)  | 2DFDA |                                                                                                                                          |               |

|       |                           |      |                            |       |                                                                                                                         |               |
|-------|---------------------------|------|----------------------------|-------|-------------------------------------------------------------------------------------------------------------------------|---------------|
| 2DFDA | <a href="#">CYS71(SG)</a> | 4.37 | <a href="#">TYR62(CG)</a>  | 2DFDA |                                                                                                                         | S[ ] ... C[ ] |
| 2DFDA | <a href="#">CYS71(SG)</a> | 3.71 | <a href="#">TYR62(CD2)</a> | 2DFDA |                                                                                                                         | S[ ] ... C[ ] |
| 2DFDA | <a href="#">CYS71(SG)</a> | 4.22 | <a href="#">TYR62(CE2)</a> | 2DFDA |                                                                                                                         | S[ ] ... C[ ] |
| 2DFDA | <a href="#">CYS71(N)</a>  | 4.43 | <a href="#">GLN67(C)</a>   | 2DFDA |                                                                                                                         | N[ ] ... C[ ] |
| 2DFDA | <a href="#">CYS71(N)</a>  | 3.28 | <a href="#">GLN67(O)</a>   | 2DFDA | <b>H-bond</b> [D-A-AA]:156.9° [A-D-DD]:122.9° d_planarity:-27.9°<br>a_planarity:15.6°                                   | N[ ] ... O[ ] |
| 2DFDA | <a href="#">CYS71(CA)</a> | 4.26 | <a href="#">GLN67(O)</a>   | 2DFDA |                                                                                                                         | C[ ] ... O[ ] |
| 2DFDA | <a href="#">CYS71(CB)</a> | 4.95 | <a href="#">GLN67(C)</a>   | 2DFDA |                                                                                                                         |               |
| 2DFDA | <a href="#">CYS71(CB)</a> | 4.03 | <a href="#">GLN67(O)</a>   | 2DFDA |                                                                                                                         | C[ ] ... O[ ] |
| 2DFDA | <a href="#">CYS71(N)</a>  | 4.96 | <a href="#">LEU68(N)</a>   | 2DFDA |                                                                                                                         |               |
| 2DFDA | <a href="#">CYS71(N)</a>  | 4.50 | <a href="#">LEU68(CA)</a>  | 2DFDA |                                                                                                                         | N[ ] ... C[ ] |
| 2DFDA | <a href="#">CYS71(N)</a>  | 3.66 | <a href="#">LEU68(C)</a>   | 2DFDA |                                                                                                                         | N[ ] ... C[ ] |
| 2DFDA | <a href="#">CYS71(N)</a>  | 2.96 | <a href="#">LEU68(O)</a>   | 2DFDA | <b>H-bond</b> [D-A-AA]:114.5° [A-D-DD]:98.8° d_planarity:-38.7°<br>a_planarity:84.3°                                    | N[ ] ... O[ ] |
| 2DFDA | <a href="#">CYS71(CA)</a> | 4.45 | <a href="#">LEU68(C)</a>   | 2DFDA |                                                                                                                         | C[ ] ... C[ ] |
| 2DFDA | <a href="#">CYS71(CA)</a> | 3.50 | <a href="#">LEU68(O)</a>   | 2DFDA |                                                                                                                         | C[ ] ... O[ ] |
| 2DFDA | <a href="#">CYS71(C)</a>  | 4.98 | <a href="#">LEU68(C)</a>   | 2DFDA |                                                                                                                         |               |
| 2DFDA | <a href="#">CYS71(C)</a>  | 3.82 | <a href="#">LEU68(O)</a>   | 2DFDA |                                                                                                                         | C[ ] ... O[ ] |
| 2DFDA | <a href="#">CYS71(CB)</a> | 4.40 | <a href="#">LEU68(CA)</a>  | 2DFDA |                                                                                                                         | C[ ] ... C[ ] |
| 2DFDA | <a href="#">CYS71(CB)</a> | 4.16 | <a href="#">LEU68(C)</a>   | 2DFDA |                                                                                                                         | C[ ] ... C[ ] |
| 2DFDA | <a href="#">CYS71(CB)</a> | 3.30 | <a href="#">LEU68(O)</a>   | 2DFDA |                                                                                                                         | C[ ] ... O[ ] |
| 2DFDA | <a href="#">CYS71(CB)</a> | 4.55 | <a href="#">LEU68(CD1)</a> | 2DFDA |                                                                                                                         |               |
| 2DFDA | <a href="#">CYS71(SG)</a> | 4.78 | <a href="#">LEU68(O)</a>   | 2DFDA |                                                                                                                         |               |
| 2DFDA | <a href="#">CYS71(N)</a>  | 4.31 | <a href="#">PRO69(N)</a>   | 2DFDA |                                                                                                                         | N[ ] ... N[ ] |
| 2DFDA | <a href="#">CYS71(N)</a>  | 4.31 | <a href="#">PRO69(CA)</a>  | 2DFDA |                                                                                                                         | N[ ] ... C[ ] |
| 2DFDA | <a href="#">CYS71(N)</a>  | 3.23 | <a href="#">PRO69(C)</a>   | 2DFDA |                                                                                                                         | N[ ] ... C[ ] |
| 2DFDA | <a href="#">CYS71(N)</a>  | 3.32 | <a href="#">PRO69(O)</a>   | 2DFDA | [D-A-AA]:74.9° [A-D-DD]:121.7° d_planarity:77.7°<br>a_planarity:50.8°, <b>bad a_angle(sp2)</b> , <b>bad d_planarity</b> | N[ ] ... O[ ] |
| 2DFDA | <a href="#">CYS71(CA)</a> | 4.43 | <a href="#">PRO69(C)</a>   | 2DFDA |                                                                                                                         | C[ ] ... C[ ] |
| 2DFDA | <a href="#">CYS71(CA)</a> | 4.28 | <a href="#">PRO69(O)</a>   | 2DFDA |                                                                                                                         | C[ ] ... O[ ] |
| 2DFDA | <a href="#">CYS71(C)</a>  | 4.60 | <a href="#">PRO69(C)</a>   | 2DFDA |                                                                                                                         |               |
| 2DFDA | <a href="#">CYS71(C)</a>  | 4.05 | <a href="#">PRO69(O)</a>   | 2DFDA |                                                                                                                         | C[ ] ... O[ ] |
| 2DFDA | <a href="#">CYS71(N)</a>  | 2.81 | <a href="#">ASP70(N)</a>   | 2DFDA |                                                                                                                         | N[ ] ... N[ ] |
| 2DFDA | <a href="#">CYS71(N)</a>  | 2.46 | <a href="#">ASP70(CA)</a>  | 2DFDA |                                                                                                                         | N[ ] ... C[ ] |
| 2DFDA | <a href="#">CYS71(N)</a>  | 2.22 | <a href="#">ASP70(O)</a>   | 2DFDA | [D-A-AA]:30.5° [A-D-DD]:93.2° d_planarity:0.1°<br>a_planarity:3.0°, <b>bad a_angle(sp2)</b>                             | N[ ] ... O[ ] |
| 2DFDA | <a href="#">CYS71(N)</a>  | 3.33 | <a href="#">ASP70(CB)</a>  | 2DFDA |                                                                                                                         | N[ ] ... C[ ] |
| 2DFDA | <a href="#">CYS71(N)</a>  | 4.73 | <a href="#">ASP70(CG)</a>  | 2DFDA |                                                                                                                         |               |
| 2DFDA | <a href="#">CYS71(CA)</a> | 4.23 | <a href="#">ASP70(N)</a>   | 2DFDA |                                                                                                                         | C[ ] ... N[ ] |
| 2DFDA | <a href="#">CYS71(CA)</a> | 3.83 | <a href="#">ASP70(CA)</a>  | 2DFDA |                                                                                                                         | C[ ] ... C[ ] |
| 2DFDA | <a href="#">CYS71(CA)</a> | 2.43 | <a href="#">ASP70(C)</a>   | 2DFDA |                                                                                                                         | C[ ] ... C[ ] |
| 2DFDA | <a href="#">CYS71(CA)</a> | 2.73 | <a href="#">ASP70(O)</a>   | 2DFDA |                                                                                                                         | C[ ] ... O[ ] |
| 2DFDA | <a href="#">CYS71(CA)</a> | 4.65 | <a href="#">ASP70(CB)</a>  | 2DFDA |                                                                                                                         |               |
| 2DFDA | <a href="#">CYS71(C)</a>  | 4.79 | <a href="#">ASP70(N)</a>   | 2DFDA |                                                                                                                         |               |
| 2DFDA | <a href="#">CYS71(C)</a>  | 4.46 | <a href="#">ASP70(CA)</a>  | 2DFDA |                                                                                                                         | C[ ] ... C[ ] |
| 2DFDA | <a href="#">CYS71(C)</a>  | 3.08 | <a href="#">ASP70(C)</a>   | 2DFDA |                                                                                                                         | C[ ] ... C[ ] |
| 2DFDA | <a href="#">CYS71(C)</a>  | 3.03 | <a href="#">ASP70(O)</a>   | 2DFDA |                                                                                                                         | C[ ] ... O[ ] |
| 2DFDA | <a href="#">CYS71(O)</a>  | 4.04 | <a href="#">ASP70(C)</a>   | 2DFDA |                                                                                                                         | O[ ] ... C[ ] |
| 2DFDA | <a href="#">CYS71(O)</a>  | 3.66 | <a href="#">ASP70(O)</a>   | 2DFDA |                                                                                                                         | O[ ] ... O[ ] |
| 2DFDA | <a href="#">CYS71(CB)</a> | 4.96 | <a href="#">ASP70(N)</a>   | 2DFDA |                                                                                                                         |               |



|       |                            |      |                             |       |                                                                                                                                        |               |
|-------|----------------------------|------|-----------------------------|-------|----------------------------------------------------------------------------------------------------------------------------------------|---------------|
| 2DFDA | <a href="#">CYS71</a> (CB) | 4.89 | <a href="#">ASP70</a> (CA)  | 2DFDA |                                                                                                                                        |               |
| 2DFDA | <a href="#">CYS71</a> (CB) | 3.70 | <a href="#">ASP70</a> (C)   | 2DFDA |                                                                                                                                        | C[ ] ... C[ ] |
| 2DFDA | <a href="#">CYS71</a> (CB) | 4.22 | <a href="#">ASP70</a> (O)   | 2DFDA |                                                                                                                                        | C[ ] ... O[ ] |
| 2DFDA | <a href="#">CYS71</a> (N)  | 2.77 | <a href="#">LEU72</a> (N)   | 2DFDA |                                                                                                                                        | N[ ] ... N[ ] |
| 2DFDA | <a href="#">CYS71</a> (N)  | 4.21 | <a href="#">LEU72</a> (CA)  | 2DFDA |                                                                                                                                        | N[ ] ... C[ ] |
| 2DFDA | <a href="#">CYS71</a> (N)  | 4.94 | <a href="#">LEU72</a> (C)   | 2DFDA |                                                                                                                                        |               |
| 2DFDA | <a href="#">CYS71</a> (N)  | 4.90 | <a href="#">LEU72</a> (CB)  | 2DFDA |                                                                                                                                        |               |
| 2DFDA | <a href="#">CYS71</a> (CA) | 2.44 | <a href="#">LEU72</a> (N)   | 2DFDA |                                                                                                                                        | C[ ] ... N[ ] |
| 2DFDA | <a href="#">CYS71</a> (CA) | 3.82 | <a href="#">LEU72</a> (CA)  | 2DFDA |                                                                                                                                        | C[ ] ... C[ ] |
| 2DFDA | <a href="#">CYS71</a> (CA) | 4.72 | <a href="#">LEU72</a> (C)   | 2DFDA |                                                                                                                                        |               |
| 2DFDA | <a href="#">CYS71</a> (CA) | 4.75 | <a href="#">LEU72</a> (CB)  | 2DFDA |                                                                                                                                        |               |
| 2DFDA | <a href="#">CYS71</a> (CA) | 4.87 | <a href="#">LEU72</a> (CG)  | 2DFDA |                                                                                                                                        |               |
| 2DFDA | <a href="#">CYS71</a> (C)  | 2.45 | <a href="#">LEU72</a> (CA)  | 2DFDA |                                                                                                                                        | C[ ] ... C[ ] |
| 2DFDA | <a href="#">CYS71</a> (C)  | 3.34 | <a href="#">LEU72</a> (C)   | 2DFDA |                                                                                                                                        | C[ ] ... C[ ] |
| 2DFDA | <a href="#">CYS71</a> (C)  | 4.29 | <a href="#">LEU72</a> (O)   | 2DFDA |                                                                                                                                        | C[ ] ... O[ ] |
| 2DFDA | <a href="#">CYS71</a> (C)  | 3.62 | <a href="#">LEU72</a> (CB)  | 2DFDA |                                                                                                                                        | C[ ] ... C[ ] |
| 2DFDA | <a href="#">CYS71</a> (C)  | 3.99 | <a href="#">LEU72</a> (CG)  | 2DFDA |                                                                                                                                        | C[ ] ... C[ ] |
| 2DFDA | <a href="#">CYS71</a> (C)  | 4.35 | <a href="#">LEU72</a> (CD2) | 2DFDA |                                                                                                                                        | C[ ] ... C[ ] |
| 2DFDA | <a href="#">CYS71</a> (O)  | 2.26 | <a href="#">LEU72</a> (N)   | 2DFDA | [D-A-AA]:29.9° [A-D-DD]:95.0° d_planarity:4.5°<br>a_planarity:0.7°, bad a_angle(sp2)                                                   | O[ ] ... N[ ] |
| 2DFDA | <a href="#">CYS71</a> (O)  | 2.80 | <a href="#">LEU72</a> (CA)  | 2DFDA |                                                                                                                                        | O[ ] ... C[ ] |
| 2DFDA | <a href="#">CYS71</a> (O)  | 3.46 | <a href="#">LEU72</a> (C)   | 2DFDA |                                                                                                                                        | O[ ] ... C[ ] |
| 2DFDA | <a href="#">CYS71</a> (O)  | 4.10 | <a href="#">LEU72</a> (O)   | 2DFDA |                                                                                                                                        | O[ ] ... O[ ] |
| 2DFDA | <a href="#">CYS71</a> (O)  | 4.17 | <a href="#">LEU72</a> (CB)  | 2DFDA |                                                                                                                                        | O[ ] ... C[ ] |
| 2DFDA | <a href="#">CYS71</a> (O)  | 4.57 | <a href="#">LEU72</a> (CG)  | 2DFDA |                                                                                                                                        |               |
| 2DFDA | <a href="#">CYS71</a> (O)  | 4.54 | <a href="#">LEU72</a> (CD2) | 2DFDA |                                                                                                                                        |               |
| 2DFDA | <a href="#">CYS71</a> (CB) | 3.26 | <a href="#">LEU72</a> (N)   | 2DFDA |                                                                                                                                        | C[ ] ... N[ ] |
| 2DFDA | <a href="#">CYS71</a> (CB) | 4.50 | <a href="#">LEU72</a> (CA)  | 2DFDA |                                                                                                                                        | C[ ] ... C[ ] |
| 2DFDA | <a href="#">CYS71</a> (CB) | 4.77 | <a href="#">LEU72</a> (CG)  | 2DFDA |                                                                                                                                        |               |
| 2DFDA | <a href="#">CYS71</a> (SG) | 4.14 | <a href="#">LEU72</a> (N)   | 2DFDA | [D-A-AA]:49.1° [A-D-DD]:119.5° d_planarity:44.3°, maximum<br>distance exceeded, bad a_angle(sp3)                                       | S[ ] ... N[ ] |
| 2DFDA | <a href="#">CYS71</a> (N)  | 4.61 | <a href="#">LYS73</a> (N)   | 2DFDA |                                                                                                                                        |               |
| 2DFDA | <a href="#">CYS71</a> (CA) | 4.72 | <a href="#">LYS73</a> (N)   | 2DFDA |                                                                                                                                        |               |
| 2DFDA | <a href="#">CYS71</a> (C)  | 3.61 | <a href="#">LYS73</a> (N)   | 2DFDA |                                                                                                                                        | C[ ] ... N[ ] |
| 2DFDA | <a href="#">CYS71</a> (C)  | 4.95 | <a href="#">LYS73</a> (CA)  | 2DFDA |                                                                                                                                        |               |
| 2DFDA | <a href="#">CYS71</a> (C)  | 4.95 | <a href="#">LYS73</a> (O)   | 2DFDA |                                                                                                                                        |               |
| 2DFDA | <a href="#">CYS71</a> (O)  | 3.94 | <a href="#">LYS73</a> (N)   | 2DFDA | [D-A-AA]:65.8° [A-D-DD]:139.7° d_planarity:77.0°<br>a_planarity:38.0°, maximum distance exceeded,<br>bad a_angle(sp2), bad d_planarity | O[ ] ... N[ ] |
| 2DFDA | <a href="#">CYS71</a> (O)  | 4.63 | <a href="#">LYS73</a> (O)   | 2DFDA |                                                                                                                                        |               |
| 2DFDA | <a href="#">CYS71</a> (C)  | 4.33 | <a href="#">CYS75</a> (SG)  | 2DFDA |                                                                                                                                        | C[ ] ... S[ ] |
| 2DFDA | <a href="#">CYS71</a> (O)  | 4.93 | <a href="#">CYS75</a> (CB)  | 2DFDA |                                                                                                                                        |               |
| 2DFDA | <a href="#">CYS71</a> (O)  | 3.32 | <a href="#">CYS75</a> (SG)  | 2DFDA |                                                                                                                                        | O[ ] ... S[ ] |

| chain1 | res1/atm1                  | distance | res2/atm2                   | chain2 | H-bonding | Charge interaction |
|--------|----------------------------|----------|-----------------------------|--------|-----------|--------------------|
| 2DFDA  | <a href="#">CYS267</a> (C) | 4.22     | <a href="#">SER262</a> (O)  | 2DFDA  |           | C[ ] ... O[ ]      |
| 2DFDA  | <a href="#">CYS267</a> (O) | 4.78     | <a href="#">SER262</a> (CA) | 2DFDA  |           |                    |

|       |                            |      |                             |       |                                                                                                                        |               |
|-------|----------------------------|------|-----------------------------|-------|------------------------------------------------------------------------------------------------------------------------|---------------|
| 2DFDA | <a href="#">CYS267(O)</a>  | 4.10 | <a href="#">SER262(C)</a>   | 2DFDA |                                                                                                                        | O[ ] ... C[ ] |
| 2DFDA | <a href="#">CYS267(O)</a>  | 3.22 | <a href="#">SER262(O)</a>   | 2DFDA |                                                                                                                        | O[ ] ... O[ ] |
| 2DFDA | <a href="#">CYS267(O)</a>  | 4.41 | <a href="#">SER262(CB)</a>  | 2DFDA |                                                                                                                        | O[ ] ... C[ ] |
| 2DFDA | <a href="#">CYS267(O)</a>  | 4.80 | <a href="#">SER262(OG)</a>  | 2DFDA | [D-A-AA]:153.9° [A-D-DD]:65.4° a_planarity:86.0°,<br>maximum distance exceeded                                         |               |
| 2DFDA | <a href="#">CYS267(O)</a>  | 4.90 | <a href="#">GLN263(N)</a>   | 2DFDA | [D-A-AA]:159.6° [A-D-DD]:84.1° d_planarity:27.2°<br>a_planarity:23.2°, maximum distance exceeded,<br>bad d_angle(sp2)  |               |
| 2DFDA | <a href="#">CYS267(O)</a>  | 4.96 | <a href="#">GLN263(CA)</a>  | 2DFDA |                                                                                                                        |               |
| 2DFDA | <a href="#">CYS267(N)</a>  | 4.85 | <a href="#">THR265(N)</a>   | 2DFDA |                                                                                                                        |               |
| 2DFDA | <a href="#">CYS267(N)</a>  | 4.12 | <a href="#">THR265(CA)</a>  | 2DFDA |                                                                                                                        | N[ ] ... C[ ] |
| 2DFDA | <a href="#">CYS267(N)</a>  | 3.13 | <a href="#">THR265(C)</a>   | 2DFDA |                                                                                                                        | N[ ] ... C[ ] |
| 2DFDA | <a href="#">CYS267(N)</a>  | 3.24 | <a href="#">THR265(O)</a>   | 2DFDA | [D-A-AA]:73.8° [A-D-DD]:126.4° d_planarity:88.6°<br>a_planarity:57.6°, bad a_angle(sp2), bad d_planarity               | N[ ] ... O[ ] |
| 2DFDA | <a href="#">CYS267(N)</a>  | 3.84 | <a href="#">THR265(CB)</a>  | 2DFDA |                                                                                                                        | N[ ] ... C[ ] |
| 2DFDA | <a href="#">CYS267(N)</a>  | 2.92 | <a href="#">THR265(OG1)</a> | 2DFDA | <b>H-bond</b> [D-A-AA]:119.6° [A-D-DD]:105.1° d_planarity:-<br>21.4°                                                   | N[ ] ... O[ ] |
| 2DFDA | <a href="#">CYS267(CA)</a> | 4.39 | <a href="#">THR265(C)</a>   | 2DFDA |                                                                                                                        | C[ ] ... C[ ] |
| 2DFDA | <a href="#">CYS267(CA)</a> | 4.28 | <a href="#">THR265(O)</a>   | 2DFDA |                                                                                                                        | C[ ] ... O[ ] |
| 2DFDA | <a href="#">CYS267(CA)</a> | 4.81 | <a href="#">THR265(CB)</a>  | 2DFDA |                                                                                                                        |               |
| 2DFDA | <a href="#">CYS267(CA)</a> | 3.59 | <a href="#">THR265(OG1)</a> | 2DFDA |                                                                                                                        | C[ ] ... O[ ] |
| 2DFDA | <a href="#">CYS267(C)</a>  | 4.63 | <a href="#">THR265(C)</a>   | 2DFDA |                                                                                                                        |               |
| 2DFDA | <a href="#">CYS267(C)</a>  | 4.12 | <a href="#">THR265(O)</a>   | 2DFDA |                                                                                                                        | C[ ] ... O[ ] |
| 2DFDA | <a href="#">CYS267(C)</a>  | 4.13 | <a href="#">THR265(OG1)</a> | 2DFDA |                                                                                                                        | C[ ] ... O[ ] |
| 2DFDA | <a href="#">CYS267(O)</a>  | 4.70 | <a href="#">THR265(N)</a>   | 2DFDA | [D-A-AA]:135.6° [A-D-DD]:86.4° d_planarity:-1.6°<br>a_planarity:-17.2°, maximum distance exceeded,<br>bad d_angle(sp2) |               |
| 2DFDA | <a href="#">CYS267(O)</a>  | 4.84 | <a href="#">THR265(CA)</a>  | 2DFDA |                                                                                                                        |               |
| 2DFDA | <a href="#">CYS267(O)</a>  | 4.08 | <a href="#">THR265(C)</a>   | 2DFDA |                                                                                                                        | O[ ] ... C[ ] |
| 2DFDA | <a href="#">CYS267(O)</a>  | 3.42 | <a href="#">THR265(O)</a>   | 2DFDA |                                                                                                                        | O[ ] ... O[ ] |
| 2DFDA | <a href="#">CYS267(O)</a>  | 4.87 | <a href="#">THR265(CB)</a>  | 2DFDA |                                                                                                                        |               |
| 2DFDA | <a href="#">CYS267(O)</a>  | 3.70 | <a href="#">THR265(OG1)</a> | 2DFDA | [D-A-AA]:101.6° [A-D-DD]:138.6° a_planarity:-7.1°,<br>maximum distance exceeded                                        | O[ ] ... O[ ] |
| 2DFDA | <a href="#">CYS267(CB)</a> | 4.66 | <a href="#">THR265(CB)</a>  | 2DFDA |                                                                                                                        |               |
| 2DFDA | <a href="#">CYS267(CB)</a> | 3.31 | <a href="#">THR265(OG1)</a> | 2DFDA |                                                                                                                        | C[ ] ... O[ ] |
| 2DFDA | <a href="#">CYS267(SG)</a> | 4.68 | <a href="#">THR265(CB)</a>  | 2DFDA |                                                                                                                        |               |
| 2DFDA | <a href="#">CYS267(SG)</a> | 3.61 | <a href="#">THR265(OG1)</a> | 2DFDA | <b>H-bond</b> [D-A-AA]:65.9° [A-D-DD]:131.0°                                                                           | S[ ] ... O[ ] |
| 2DFDA | <a href="#">CYS267(N)</a>  | 2.84 | <a href="#">GLU266(N)</a>   | 2DFDA |                                                                                                                        | N[ ] ... N[ ] |
| 2DFDA | <a href="#">CYS267(N)</a>  | 2.48 | <a href="#">GLU266(CA)</a>  | 2DFDA |                                                                                                                        | N[ ] ... C[ ] |
| 2DFDA | <a href="#">CYS267(N)</a>  | 2.20 | <a href="#">GLU266(O)</a>   | 2DFDA | [D-A-AA]:31.2° [A-D-DD]:92.8° d_planarity:1.5°<br>a_planarity:1.1°, bad a_angle(sp2)                                   | N[ ] ... O[ ] |
| 2DFDA | <a href="#">CYS267(N)</a>  | 3.51 | <a href="#">GLU266(CB)</a>  | 2DFDA |                                                                                                                        | N[ ] ... C[ ] |
| 2DFDA | <a href="#">CYS267(N)</a>  | 3.63 | <a href="#">GLU266(CG)</a>  | 2DFDA |                                                                                                                        | N[ ] ... C[ ] |
| 2DFDA | <a href="#">CYS267(CA)</a> | 4.28 | <a href="#">GLU266(N)</a>   | 2DFDA |                                                                                                                        | C[ ] ... N[ ] |
| 2DFDA | <a href="#">CYS267(CA)</a> | 3.85 | <a href="#">GLU266(CA)</a>  | 2DFDA |                                                                                                                        | C[ ] ... C[ ] |
| 2DFDA | <a href="#">CYS267(CA)</a> | 2.42 | <a href="#">GLU266(C)</a>   | 2DFDA |                                                                                                                        | C[ ] ... C[ ] |
| 2DFDA | <a href="#">CYS267(CA)</a> | 2.70 | <a href="#">GLU266(O)</a>   | 2DFDA |                                                                                                                        | C[ ] ... O[ ] |
| 2DFDA | <a href="#">CYS267(CA)</a> | 4.79 | <a href="#">GLU266(CB)</a>  | 2DFDA |                                                                                                                        |               |
| 2DFDA | <a href="#">CYS267(CA)</a> | 4.77 | <a href="#">GLU266(CG)</a>  | 2DFDA |                                                                                                                        |               |
| 2DFDA | <a href="#">CYS267(C)</a>  | 4.86 | <a href="#">GLU266(N)</a>   | 2DFDA |                                                                                                                        |               |
| 2DFDA | <a href="#">CYS267(C)</a>  | 4.43 | <a href="#">GLU266(CA)</a>  | 2DFDA |                                                                                                                        | C[ ] ... C[ ] |
| 2DFDA | <a href="#">CYS267(C)</a>  | 3.06 | <a href="#">GLU266(C)</a>   | 2DFDA |                                                                                                                        | C[ ] ... C[ ] |

|       |                             |      |                              |       |                                                                                                                       |               |
|-------|-----------------------------|------|------------------------------|-------|-----------------------------------------------------------------------------------------------------------------------|---------------|
| 2DFDA | <a href="#">CYS267</a> (C)  | 3.07 | <a href="#">GLU266</a> (O)   | 2DFDA |                                                                                                                       | C[ ] ... O[ ] |
| 2DFDA | <a href="#">CYS267</a> (O)  | 4.64 | <a href="#">GLU266</a> (N)   | 2DFDA | [D-A-AA]:92.9° [A-D-DD]:75.1° d_planarity:37.5°<br>a_planarity:-35.8°, maximum distance exceeded,<br>bad d_angle(sp2) |               |
| 2DFDA | <a href="#">CYS267</a> (O)  | 4.50 | <a href="#">GLU266</a> (CA)  | 2DFDA |                                                                                                                       | O[ ] ... C[ ] |
| 2DFDA | <a href="#">CYS267</a> (O)  | 3.42 | <a href="#">GLU266</a> (C)   | 2DFDA |                                                                                                                       | O[ ] ... C[ ] |
| 2DFDA | <a href="#">CYS267</a> (O)  | 3.66 | <a href="#">GLU266</a> (O)   | 2DFDA |                                                                                                                       | O[ ] ... O[ ] |
| 2DFDA | <a href="#">CYS267</a> (CB) | 4.93 | <a href="#">GLU266</a> (CA)  | 2DFDA |                                                                                                                       |               |
| 2DFDA | <a href="#">CYS267</a> (CB) | 3.71 | <a href="#">GLU266</a> (C)   | 2DFDA |                                                                                                                       | C[ ] ... C[ ] |
| 2DFDA | <a href="#">CYS267</a> (CB) | 4.18 | <a href="#">GLU266</a> (O)   | 2DFDA |                                                                                                                       | C[ ] ... O[ ] |
| 2DFDA | <a href="#">CYS267</a> (SG) | 4.26 | <a href="#">GLU266</a> (C)   | 2DFDA |                                                                                                                       | S[ ] ... C[ ] |
| 2DFDA | <a href="#">CYS267</a> (SG) | 4.88 | <a href="#">GLU266</a> (O)   | 2DFDA |                                                                                                                       |               |
| 2DFDA | <a href="#">CYS267</a> (SG) | 4.95 | <a href="#">GLU266</a> (CG)  | 2DFDA |                                                                                                                       |               |
| 2DFDA | <a href="#">CYS267</a> (N)  | 3.52 | <a href="#">THR268</a> (N)   | 2DFDA |                                                                                                                       | N[ ] ... N[ ] |
| 2DFDA | <a href="#">CYS267</a> (N)  | 4.71 | <a href="#">THR268</a> (CA)  | 2DFDA |                                                                                                                       |               |
| 2DFDA | <a href="#">CYS267</a> (CA) | 2.42 | <a href="#">THR268</a> (N)   | 2DFDA |                                                                                                                       | C[ ] ... N[ ] |
| 2DFDA | <a href="#">CYS267</a> (CA) | 3.78 | <a href="#">THR268</a> (CA)  | 2DFDA |                                                                                                                       | C[ ] ... C[ ] |
| 2DFDA | <a href="#">CYS267</a> (CA) | 4.52 | <a href="#">THR268</a> (C)   | 2DFDA |                                                                                                                       |               |
| 2DFDA | <a href="#">CYS267</a> (CA) | 4.82 | <a href="#">THR268</a> (CB)  | 2DFDA |                                                                                                                       |               |
| 2DFDA | <a href="#">CYS267</a> (CA) | 4.97 | <a href="#">THR268</a> (OG1) | 2DFDA |                                                                                                                       |               |
| 2DFDA | <a href="#">CYS267</a> (CA) | 4.95 | <a href="#">THR268</a> (CG2) | 2DFDA |                                                                                                                       |               |
| 2DFDA | <a href="#">CYS267</a> (C)  | 2.40 | <a href="#">THR268</a> (CA)  | 2DFDA |                                                                                                                       | C[ ] ... C[ ] |
| 2DFDA | <a href="#">CYS267</a> (C)  | 3.14 | <a href="#">THR268</a> (C)   | 2DFDA |                                                                                                                       | C[ ] ... C[ ] |
| 2DFDA | <a href="#">CYS267</a> (C)  | 4.15 | <a href="#">THR268</a> (O)   | 2DFDA |                                                                                                                       | C[ ] ... O[ ] |
| 2DFDA | <a href="#">CYS267</a> (C)  | 3.66 | <a href="#">THR268</a> (CB)  | 2DFDA |                                                                                                                       | C[ ] ... C[ ] |
| 2DFDA | <a href="#">CYS267</a> (C)  | 4.08 | <a href="#">THR268</a> (OG1) | 2DFDA |                                                                                                                       | C[ ] ... O[ ] |
| 2DFDA | <a href="#">CYS267</a> (C)  | 4.00 | <a href="#">THR268</a> (CG2) | 2DFDA |                                                                                                                       | C[ ] ... C[ ] |
| 2DFDA | <a href="#">CYS267</a> (O)  | 2.24 | <a href="#">THR268</a> (N)   | 2DFDA | [D-A-AA]:29.7° [A-D-DD]:91.8° d_planarity:3.1°<br>a_planarity:1.3°, bad a_angle(sp2)                                  | O[ ] ... N[ ] |
| 2DFDA | <a href="#">CYS267</a> (O)  | 2.71 | <a href="#">THR268</a> (CA)  | 2DFDA |                                                                                                                       | O[ ] ... C[ ] |
| 2DFDA | <a href="#">CYS267</a> (O)  | 3.16 | <a href="#">THR268</a> (C)   | 2DFDA |                                                                                                                       | O[ ] ... C[ ] |
| 2DFDA | <a href="#">CYS267</a> (O)  | 3.90 | <a href="#">THR268</a> (O)   | 2DFDA |                                                                                                                       | O[ ] ... O[ ] |
| 2DFDA | <a href="#">CYS267</a> (O)  | 4.15 | <a href="#">THR268</a> (CB)  | 2DFDA |                                                                                                                       | O[ ] ... C[ ] |
| 2DFDA | <a href="#">CYS267</a> (O)  | 4.84 | <a href="#">THR268</a> (OG1) | 2DFDA | [D-A-AA]:45.6° [A-D-DD]:53.0° a_planarity:1.3°, maximum<br>distance exceeded, bad a_angle(sp2), bad d_angle(sp3)      |               |
| 2DFDA | <a href="#">CYS267</a> (O)  | 4.55 | <a href="#">THR268</a> (CG2) | 2DFDA |                                                                                                                       |               |
| 2DFDA | <a href="#">CYS267</a> (CB) | 3.30 | <a href="#">THR268</a> (N)   | 2DFDA |                                                                                                                       | C[ ] ... N[ ] |
| 2DFDA | <a href="#">CYS267</a> (CB) | 4.60 | <a href="#">THR268</a> (CA)  | 2DFDA |                                                                                                                       |               |
| 2DFDA | <a href="#">CYS267</a> (CB) | 4.89 | <a href="#">THR268</a> (C)   | 2DFDA |                                                                                                                       |               |
| 2DFDA | <a href="#">CYS267</a> (SG) | 4.90 | <a href="#">THR268</a> (N)   | 2DFDA | [D-A-AA]:21.1° [A-D-DD]:157.4° d_planarity:41.8°,<br>maximum distance exceeded, bad a_angle(sp3)                      |               |
| 2DFDA | <a href="#">CYS267</a> (CA) | 4.29 | <a href="#">TYR269</a> (N)   | 2DFDA |                                                                                                                       | C[ ] ... N[ ] |
| 2DFDA | <a href="#">CYS267</a> (CA) | 4.25 | <a href="#">TYR269</a> (O)   | 2DFDA |                                                                                                                       | C[ ] ... O[ ] |
| 2DFDA | <a href="#">CYS267</a> (C)  | 3.19 | <a href="#">TYR269</a> (N)   | 2DFDA |                                                                                                                       | C[ ] ... N[ ] |
| 2DFDA | <a href="#">CYS267</a> (C)  | 4.39 | <a href="#">TYR269</a> (CA)  | 2DFDA |                                                                                                                       | C[ ] ... C[ ] |
| 2DFDA | <a href="#">CYS267</a> (C)  | 4.41 | <a href="#">TYR269</a> (C)   | 2DFDA |                                                                                                                       | C[ ] ... C[ ] |
| 2DFDA | <a href="#">CYS267</a> (C)  | 3.94 | <a href="#">TYR269</a> (O)   | 2DFDA |                                                                                                                       | C[ ] ... O[ ] |
| 2DFDA | <a href="#">CYS267</a> (O)  | 3.37 | <a href="#">TYR269</a> (N)   | 2DFDA | [D-A-AA]:70.7° [A-D-DD]:123.5° d_planarity:86.1°<br>a_planarity:46.5°, bad a_angle(sp2), bad d_planarity              | O[ ] ... N[ ] |
| 2DFDA | <a href="#">CYS267</a> (O)  | 4.36 | <a href="#">TYR269</a> (CA)  | 2DFDA |                                                                                                                       | O[ ] ... C[ ] |
| 2DFDA | <a href="#">CYS267</a> (O)  | 4.31 | <a href="#">TYR269</a> (C)   | 2DFDA |                                                                                                                       | O[ ] ... C[ ] |

|       |                            |      |                             |       |                                                                                                |               |
|-------|----------------------------|------|-----------------------------|-------|------------------------------------------------------------------------------------------------|---------------|
| 2DFDA | <a href="#">CYS267(O)</a>  | 4.08 | <a href="#">TYR269(O)</a>   | 2DFDA |                                                                                                | O[ ] ... O[ ] |
| 2DFDA | <a href="#">CYS267(CB)</a> | 4.26 | <a href="#">TYR269(N)</a>   | 2DFDA |                                                                                                | C[ ] ... N[ ] |
| 2DFDA | <a href="#">CYS267(CB)</a> | 4.98 | <a href="#">TYR269(CA)</a>  | 2DFDA |                                                                                                |               |
| 2DFDA | <a href="#">CYS267(CB)</a> | 4.29 | <a href="#">TYR269(C)</a>   | 2DFDA |                                                                                                | C[ ] ... C[ ] |
| 2DFDA | <a href="#">CYS267(CB)</a> | 3.26 | <a href="#">TYR269(O)</a>   | 2DFDA |                                                                                                | C[ ] ... O[ ] |
| 2DFDA | <a href="#">CYS267(SG)</a> | 4.51 | <a href="#">TYR269(O)</a>   | 2DFDA |                                                                                                |               |
| 2DFDA | <a href="#">CYS267(O)</a>  | 4.59 | <a href="#">PHE270(CB)</a>  | 2DFDA |                                                                                                |               |
| 2DFDA | <a href="#">CYS267(CB)</a> | 4.45 | <a href="#">PHE270(CB)</a>  | 2DFDA |                                                                                                | C[ ] ... C[ ] |
| 2DFDA | <a href="#">CYS267(CB)</a> | 4.72 | <a href="#">PHE270(CG)</a>  | 2DFDA |                                                                                                |               |
| 2DFDA | <a href="#">CYS267(CB)</a> | 4.09 | <a href="#">PHE270(CD2)</a> | 2DFDA |                                                                                                | C[ ] ... C[ ] |
| 2DFDA | <a href="#">CYS267(SG)</a> | 4.16 | <a href="#">PHE270(CD2)</a> | 2DFDA |                                                                                                | S[ ] ... C[ ] |
| 2DFDA | <a href="#">CYS267(SG)</a> | 4.61 | <a href="#">PHE270(CE2)</a> | 2DFDA |                                                                                                |               |
| 2DFDA | <a href="#">CYS267(SG)</a> | 4.26 | <a href="#">ILE302(CA)</a>  | 2DFDA |                                                                                                | S[ ] ... C[ ] |
| 2DFDA | <a href="#">CYS267(SG)</a> | 4.63 | <a href="#">ILE302(C)</a>   | 2DFDA |                                                                                                |               |
| 2DFDA | <a href="#">CYS267(SG)</a> | 4.09 | <a href="#">ILE302(O)</a>   | 2DFDA |                                                                                                | S[ ] ... O[ ] |
| 2DFDA | <a href="#">CYS267(SG)</a> | 4.26 | <a href="#">ILE302(CB)</a>  | 2DFDA |                                                                                                | S[ ] ... C[ ] |
| 2DFDA | <a href="#">CYS267(SG)</a> | 3.79 | <a href="#">ILE302(CG1)</a> | 2DFDA |                                                                                                | S[ ] ... C[ ] |
| 2DFDA | <a href="#">CYS267(SG)</a> | 4.14 | <a href="#">ILE302(CG2)</a> | 2DFDA |                                                                                                | S[ ] ... C[ ] |
| 2DFDA | <a href="#">CYS267(SG)</a> | 4.62 | <a href="#">ILE302(CD1)</a> | 2DFDA |                                                                                                |               |
| 2DFDA | <a href="#">CYS267(CB)</a> | 4.80 | <a href="#">LEU305(CB)</a>  | 2DFDA |                                                                                                |               |
| 2DFDA | <a href="#">CYS267(CB)</a> | 4.88 | <a href="#">LEU305(CD1)</a> | 2DFDA |                                                                                                |               |
| 2DFDA | <a href="#">CYS267(SG)</a> | 3.95 | <a href="#">LEU305(CB)</a>  | 2DFDA |                                                                                                | S[ ] ... C[ ] |
| 2DFDA | <a href="#">CYS267(SG)</a> | 4.72 | <a href="#">LEU305(CG)</a>  | 2DFDA |                                                                                                |               |
| 2DFDA | <a href="#">CYS267(SG)</a> | 4.16 | <a href="#">LEU305(CD1)</a> | 2DFDA |                                                                                                | S[ ] ... C[ ] |
| 2DFDA | <a href="#">CYS267(CA)</a> | 4.74 | <a href="#">LYS306(CG)</a>  | 2DFDA |                                                                                                |               |
| 2DFDA | <a href="#">CYS267(CB)</a> | 4.94 | <a href="#">LYS306(CG)</a>  | 2DFDA |                                                                                                |               |
| 2DFDA | <a href="#">CYS267(SG)</a> | 4.65 | <a href="#">LYS306(N)</a>   | 2DFDA | [D-A-AA]:105.3° [A-D-DD]:107.0° d_planarity:-68.9°, maximum distance exceeded, bad d_planarity |               |
| 2DFDA | <a href="#">CYS267(SG)</a> | 4.23 | <a href="#">LYS306(CG)</a>  | 2DFDA | positive                                                                                       | S[ ] ... C[ ] |
| 2DFDA | <a href="#">CYS267(CA)</a> | 4.53 | <a href="#">ILE309(CD1)</a> | 2DFDA |                                                                                                |               |
| 2DFDA | <a href="#">CYS267(C)</a>  | 4.54 | <a href="#">ILE309(CD1)</a> | 2DFDA |                                                                                                |               |
| 2DFDA | <a href="#">CYS267(CB)</a> | 4.15 | <a href="#">ILE309(CD1)</a> | 2DFDA |                                                                                                | C[ ] ... C[ ] |

| chain1 | res1/atm1                | Distance | res2/atm2                 | chain2 | H-bonding                                                                                                       | Charge interaction |
|--------|--------------------------|----------|---------------------------|--------|-----------------------------------------------------------------------------------------------------------------|--------------------|
| 2ZKRn  | <a href="#">CYS75(O)</a> | 5.00     | <a href="#">CYS61(O)</a>  | 2ZKRn  |                                                                                                                 |                    |
| 2ZKRn  | <a href="#">CYS75(C)</a> | 4.58     | <a href="#">GLN62(CA)</a> | 2ZKRn  |                                                                                                                 |                    |
| 2ZKRn  | <a href="#">CYS75(C)</a> | 4.74     | <a href="#">GLN62(C)</a>  | 2ZKRn  |                                                                                                                 |                    |
| 2ZKRn  | <a href="#">CYS75(C)</a> | 4.92     | <a href="#">GLN62(CG)</a> | 2ZKRn  |                                                                                                                 |                    |
| 2ZKRn  | <a href="#">CYS75(O)</a> | 4.87     | <a href="#">GLN62(N)</a>  | 2ZKRn  | [D-A-AA]:125.2° [A-D-DD]:26.9° d_planarity:53.0° a_planarity:24.3°, maximum distance exceeded, bad d_angle(sp2) |                    |
| 2ZKRn  | <a href="#">CYS75(O)</a> | 3.63     | <a href="#">GLN62(CA)</a> | 2ZKRn  |                                                                                                                 | O[ ] ... C[ ]      |
| 2ZKRn  | <a href="#">CYS75(O)</a> | 3.65     | <a href="#">GLN62(C)</a>  | 2ZKRn  |                                                                                                                 | O[ ] ... C[ ]      |
| 2ZKRn  | <a href="#">CYS75(O)</a> | 4.84     | <a href="#">GLN62(O)</a>  | 2ZKRn  |                                                                                                                 |                    |
| 2ZKRn  | <a href="#">CYS75(O)</a> | 4.29     | <a href="#">GLN62(CB)</a> | 2ZKRn  |                                                                                                                 | O[ ] ... C[ ]      |
| 2ZKRn  | <a href="#">CYS75(O)</a> | 3.93     | <a href="#">GLN62(CG)</a> | 2ZKRn  |                                                                                                                 | O[ ] ... C[ ]      |
| 2ZKRn  | <a href="#">CYS75(N)</a> | 4.86     | <a href="#">ILE63(N)</a>  | 2ZKRn  |                                                                                                                 |                    |

|       |                           |      |                            |       |                                                                                                                                        |               |
|-------|---------------------------|------|----------------------------|-------|----------------------------------------------------------------------------------------------------------------------------------------|---------------|
| 2ZKRn | <a href="#">CYS75(N)</a>  | 4.88 | <a href="#">ILE63(C)</a>   | 2ZKRn |                                                                                                                                        |               |
| 2ZKRn | <a href="#">CYS75(N)</a>  | 3.94 | <a href="#">ILE63(O)</a>   | 2ZKRn | [D-A-AA]:134.8° [A-D-DD]:120.4° d_planarity:-12.7°<br>a_planarity:-3.1°, maximum distance exceeded                                     | N[ ] ... O[ ] |
| 2ZKRn | <a href="#">CYS75(N)</a>  | 4.69 | <a href="#">ILE63(CB)</a>  | 2ZKRn |                                                                                                                                        |               |
| 2ZKRn | <a href="#">CYS75(N)</a>  | 3.31 | <a href="#">ILE63(CG2)</a> | 2ZKRn |                                                                                                                                        | N[ ] ... C[ ] |
| 2ZKRn | <a href="#">CYS75(CA)</a> | 4.91 | <a href="#">ILE63(N)</a>   | 2ZKRn |                                                                                                                                        |               |
| 2ZKRn | <a href="#">CYS75(CA)</a> | 4.84 | <a href="#">ILE63(O)</a>   | 2ZKRn |                                                                                                                                        |               |
| 2ZKRn | <a href="#">CYS75(CA)</a> | 5.00 | <a href="#">ILE63(CB)</a>  | 2ZKRn |                                                                                                                                        |               |
| 2ZKRn | <a href="#">CYS75(CA)</a> | 3.55 | <a href="#">ILE63(CG2)</a> | 2ZKRn |                                                                                                                                        | C[ ] ... C[ ] |
| 2ZKRn | <a href="#">CYS75(C)</a>  | 3.91 | <a href="#">ILE63(N)</a>   | 2ZKRn |                                                                                                                                        | C[ ] ... N[ ] |
| 2ZKRn | <a href="#">CYS75(C)</a>  | 4.75 | <a href="#">ILE63(CA)</a>  | 2ZKRn |                                                                                                                                        |               |
| 2ZKRn | <a href="#">CYS75(C)</a>  | 4.56 | <a href="#">ILE63(O)</a>   | 2ZKRn |                                                                                                                                        |               |
| 2ZKRn | <a href="#">CYS75(C)</a>  | 4.68 | <a href="#">ILE63(CB)</a>  | 2ZKRn |                                                                                                                                        |               |
| 2ZKRn | <a href="#">CYS75(C)</a>  | 3.47 | <a href="#">ILE63(CG2)</a> | 2ZKRn |                                                                                                                                        | C[ ] ... C[ ] |
| 2ZKRn | <a href="#">CYS75(O)</a>  | 2.81 | <a href="#">ILE63(N)</a>   | 2ZKRn | <b>H-bond</b> [D-A-AA]:148.3° [A-D-DD]:117.6° d_planarity:-11.9°<br>a_planarity:84.6°                                                  | O[ ] ... N[ ] |
| 2ZKRn | <a href="#">CYS75(O)</a>  | 3.72 | <a href="#">ILE63(CA)</a>  | 2ZKRn |                                                                                                                                        | O[ ] ... C[ ] |
| 2ZKRn | <a href="#">CYS75(O)</a>  | 4.02 | <a href="#">ILE63(C)</a>   | 2ZKRn |                                                                                                                                        | O[ ] ... C[ ] |
| 2ZKRn | <a href="#">CYS75(O)</a>  | 3.58 | <a href="#">ILE63(O)</a>   | 2ZKRn |                                                                                                                                        | O[ ] ... O[ ] |
| 2ZKRn | <a href="#">CYS75(O)</a>  | 3.95 | <a href="#">ILE63(CB)</a>  | 2ZKRn |                                                                                                                                        | O[ ] ... C[ ] |
| 2ZKRn | <a href="#">CYS75(O)</a>  | 3.01 | <a href="#">ILE63(CG2)</a> | 2ZKRn |                                                                                                                                        | O[ ] ... C[ ] |
| 2ZKRn | <a href="#">CYS75(CB)</a> | 4.86 | <a href="#">ILE63(CB)</a>  | 2ZKRn |                                                                                                                                        |               |
| 2ZKRn | <a href="#">CYS75(CB)</a> | 3.39 | <a href="#">ILE63(CG2)</a> | 2ZKRn |                                                                                                                                        | C[ ] ... C[ ] |
| 2ZKRn | <a href="#">CYS75(SG)</a> | 4.66 | <a href="#">ILE63(CG2)</a> | 2ZKRn |                                                                                                                                        |               |
| 2ZKRn | <a href="#">CYS75(N)</a>  | 4.43 | <a href="#">ILE73(CA)</a>  | 2ZKRn |                                                                                                                                        | N[ ] ... C[ ] |
| 2ZKRn | <a href="#">CYS75(N)</a>  | 3.39 | <a href="#">ILE73(C)</a>   | 2ZKRn |                                                                                                                                        | N[ ] ... C[ ] |
| 2ZKRn | <a href="#">CYS75(N)</a>  | 3.61 | <a href="#">ILE73(O)</a>   | 2ZKRn | [D-A-AA]:69.7° [A-D-DD]:124.4° d_planarity:67.8°<br>a_planarity:50.0°, maximum distance exceeded,<br>bad a_angle(sp2), bad d_planarity | N[ ] ... O[ ] |
| 2ZKRn | <a href="#">CYS75(N)</a>  | 4.81 | <a href="#">ILE73(CB)</a>  | 2ZKRn |                                                                                                                                        |               |
| 2ZKRn | <a href="#">CYS75(N)</a>  | 3.92 | <a href="#">ILE73(CG2)</a> | 2ZKRn |                                                                                                                                        | N[ ] ... C[ ] |
| 2ZKRn | <a href="#">CYS75(CA)</a> | 4.55 | <a href="#">ILE73(C)</a>   | 2ZKRn |                                                                                                                                        |               |
| 2ZKRn | <a href="#">CYS75(CA)</a> | 4.59 | <a href="#">ILE73(O)</a>   | 2ZKRn |                                                                                                                                        |               |
| 2ZKRn | <a href="#">CYS75(CA)</a> | 4.27 | <a href="#">ILE73(CG2)</a> | 2ZKRn |                                                                                                                                        | C[ ] ... C[ ] |
| 2ZKRn | <a href="#">CYS75(C)</a>  | 4.85 | <a href="#">ILE73(C)</a>   | 2ZKRn |                                                                                                                                        |               |
| 2ZKRn | <a href="#">CYS75(C)</a>  | 3.62 | <a href="#">ILE73(CG2)</a> | 2ZKRn |                                                                                                                                        | C[ ] ... C[ ] |
| 2ZKRn | <a href="#">CYS75(O)</a>  | 4.69 | <a href="#">ILE73(CA)</a>  | 2ZKRn |                                                                                                                                        |               |
| 2ZKRn | <a href="#">CYS75(O)</a>  | 4.52 | <a href="#">ILE73(C)</a>   | 2ZKRn |                                                                                                                                        |               |
| 2ZKRn | <a href="#">CYS75(O)</a>  | 4.95 | <a href="#">ILE73(O)</a>   | 2ZKRn |                                                                                                                                        |               |
| 2ZKRn | <a href="#">CYS75(O)</a>  | 4.45 | <a href="#">ILE73(CB)</a>  | 2ZKRn |                                                                                                                                        | O[ ] ... C[ ] |
| 2ZKRn | <a href="#">CYS75(O)</a>  | 3.04 | <a href="#">ILE73(CG2)</a> | 2ZKRn |                                                                                                                                        | O[ ] ... C[ ] |
| 2ZKRn | <a href="#">CYS75(N)</a>  | 2.85 | <a href="#">VAL74(N)</a>   | 2ZKRn |                                                                                                                                        | N[ ] ... N[ ] |
| 2ZKRn | <a href="#">CYS75(N)</a>  | 2.43 | <a href="#">VAL74(CA)</a>  | 2ZKRn |                                                                                                                                        | N[ ] ... C[ ] |
| 2ZKRn | <a href="#">CYS75(N)</a>  | 2.23 | <a href="#">VAL74(O)</a>   | 2ZKRn | [D-A-AA]:30.4° [A-D-DD]:98.2° d_planarity:0.2°<br>a_planarity:1.8°, bad a_angle(sp2)                                                   | N[ ] ... O[ ] |
| 2ZKRn | <a href="#">CYS75(N)</a>  | 3.17 | <a href="#">VAL74(CB)</a>  | 2ZKRn |                                                                                                                                        | N[ ] ... C[ ] |
| 2ZKRn | <a href="#">CYS75(N)</a>  | 3.28 | <a href="#">VAL74(CG1)</a> | 2ZKRn |                                                                                                                                        | N[ ] ... C[ ] |
| 2ZKRn | <a href="#">CYS75(N)</a>  | 3.56 | <a href="#">VAL74(CG2)</a> | 2ZKRn |                                                                                                                                        | N[ ] ... C[ ] |
| 2ZKRn | <a href="#">CYS75(CA)</a> | 4.23 | <a href="#">VAL74(N)</a>   | 2ZKRn |                                                                                                                                        | C[ ] ... N[ ] |
| 2ZKRn | <a href="#">CYS75(CA)</a> | 3.83 | <a href="#">VAL74(CA)</a>  | 2ZKRn |                                                                                                                                        | C[ ] ... C[ ] |

|       |                           |      |                             |       |                                                                                                                      |               |
|-------|---------------------------|------|-----------------------------|-------|----------------------------------------------------------------------------------------------------------------------|---------------|
| 2ZKRn | <a href="#">CYS75(CA)</a> | 2.48 | <a href="#">VAL74(C)</a>    | 2ZKRn |                                                                                                                      | C[ ] ... C[ ] |
| 2ZKRn | <a href="#">CYS75(CA)</a> | 2.83 | <a href="#">VAL74(O)</a>    | 2ZKRn |                                                                                                                      | C[ ] ... O[ ] |
| 2ZKRn | <a href="#">CYS75(CA)</a> | 4.52 | <a href="#">VAL74(CB)</a>   | 2ZKRn |                                                                                                                      |               |
| 2ZKRn | <a href="#">CYS75(CA)</a> | 4.50 | <a href="#">VAL74(CG1)</a>  | 2ZKRn |                                                                                                                      |               |
| 2ZKRn | <a href="#">CYS75(CA)</a> | 4.62 | <a href="#">VAL74(CG2)</a>  | 2ZKRn |                                                                                                                      |               |
| 2ZKRn | <a href="#">CYS75(C)</a>  | 4.74 | <a href="#">VAL74(N)</a>    | 2ZKRn |                                                                                                                      |               |
| 2ZKRn | <a href="#">CYS75(C)</a>  | 4.79 | <a href="#">VAL74(CA)</a>   | 2ZKRn |                                                                                                                      |               |
| 2ZKRn | <a href="#">CYS75(C)</a>  | 3.67 | <a href="#">VAL74(C)</a>    | 2ZKRn |                                                                                                                      | C[ ] ... C[ ] |
| 2ZKRn | <a href="#">CYS75(C)</a>  | 4.17 | <a href="#">VAL74(O)</a>    | 2ZKRn |                                                                                                                      | C[ ] ... O[ ] |
| 2ZKRn | <a href="#">CYS75(O)</a>  | 4.42 | <a href="#">VAL74(N)</a>    | 2ZKRn | [D-A-AA]:97.8° [A-D-DD]:96.1° d_planarity:88.5°<br>a_planarity:-26.2°, maximum distance exceeded,<br>bad d_planarity | O[ ] ... N[ ] |
| 2ZKRn | <a href="#">CYS75(O)</a>  | 4.80 | <a href="#">VAL74(CA)</a>   | 2ZKRn |                                                                                                                      |               |
| 2ZKRn | <a href="#">CYS75(O)</a>  | 4.02 | <a href="#">VAL74(C)</a>    | 2ZKRn |                                                                                                                      | O[ ] ... C[ ] |
| 2ZKRn | <a href="#">CYS75(O)</a>  | 4.79 | <a href="#">VAL74(O)</a>    | 2ZKRn |                                                                                                                      |               |
| 2ZKRn | <a href="#">CYS75(CB)</a> | 4.62 | <a href="#">VAL74(CA)</a>   | 2ZKRn |                                                                                                                      |               |
| 2ZKRn | <a href="#">CYS75(CB)</a> | 3.34 | <a href="#">VAL74(C)</a>    | 2ZKRn |                                                                                                                      | C[ ] ... C[ ] |
| 2ZKRn | <a href="#">CYS75(CB)</a> | 3.58 | <a href="#">VAL74(O)</a>    | 2ZKRn |                                                                                                                      | C[ ] ... O[ ] |
| 2ZKRn | <a href="#">CYS75(CB)</a> | 4.86 | <a href="#">VAL74(CB)</a>   | 2ZKRn |                                                                                                                      |               |
| 2ZKRn | <a href="#">CYS75(CB)</a> | 4.64 | <a href="#">VAL74(CG1)</a>  | 2ZKRn |                                                                                                                      |               |
| 2ZKRn | <a href="#">CYS75(CB)</a> | 4.59 | <a href="#">VAL74(CG2)</a>  | 2ZKRn |                                                                                                                      |               |
| 2ZKRn | <a href="#">CYS75(SG)</a> | 4.67 | <a href="#">VAL74(CA)</a>   | 2ZKRn |                                                                                                                      |               |
| 2ZKRn | <a href="#">CYS75(SG)</a> | 3.42 | <a href="#">VAL74(C)</a>    | 2ZKRn |                                                                                                                      | S[ ] ... C[ ] |
| 2ZKRn | <a href="#">CYS75(SG)</a> | 3.22 | <a href="#">VAL74(O)</a>    | 2ZKRn |                                                                                                                      | S[ ] ... O[ ] |
| 2ZKRn | <a href="#">CYS75(SG)</a> | 4.73 | <a href="#">VAL74(CB)</a>   | 2ZKRn |                                                                                                                      |               |
| 2ZKRn | <a href="#">CYS75(SG)</a> | 4.88 | <a href="#">VAL74(CG1)</a>  | 2ZKRn |                                                                                                                      |               |
| 2ZKRn | <a href="#">CYS75(SG)</a> | 3.93 | <a href="#">VAL74(CG2)</a>  | 2ZKRn |                                                                                                                      | S[ ] ... C[ ] |
| 2ZKRn | <a href="#">CYS75(N)</a>  | 3.65 | <a href="#">ALA76(N)</a>    | 2ZKRn |                                                                                                                      | N[ ] ... N[ ] |
| 2ZKRn | <a href="#">CYS75(N)</a>  | 4.90 | <a href="#">ALA76(CA)</a>   | 2ZKRn |                                                                                                                      |               |
| 2ZKRn | <a href="#">CYS75(CA)</a> | 2.43 | <a href="#">ALA76(N)</a>    | 2ZKRn |                                                                                                                      | C[ ] ... N[ ] |
| 2ZKRn | <a href="#">CYS75(CA)</a> | 3.82 | <a href="#">ALA76(CA)</a>   | 2ZKRn |                                                                                                                      | C[ ] ... C[ ] |
| 2ZKRn | <a href="#">CYS75(CA)</a> | 4.84 | <a href="#">ALA76(C)</a>    | 2ZKRn |                                                                                                                      |               |
| 2ZKRn | <a href="#">CYS75(CA)</a> | 4.81 | <a href="#">ALA76(O)</a>    | 2ZKRn |                                                                                                                      |               |
| 2ZKRn | <a href="#">CYS75(CA)</a> | 4.45 | <a href="#">ALA76(CB)</a>   | 2ZKRn |                                                                                                                      | C[ ] ... C[ ] |
| 2ZKRn | <a href="#">CYS75(C)</a>  | 2.45 | <a href="#">ALA76(CA)</a>   | 2ZKRn |                                                                                                                      | C[ ] ... C[ ] |
| 2ZKRn | <a href="#">CYS75(C)</a>  | 3.70 | <a href="#">ALA76(C)</a>    | 2ZKRn |                                                                                                                      | C[ ] ... C[ ] |
| 2ZKRn | <a href="#">CYS75(C)</a>  | 3.97 | <a href="#">ALA76(O)</a>    | 2ZKRn |                                                                                                                      | C[ ] ... O[ ] |
| 2ZKRn | <a href="#">CYS75(C)</a>  | 3.08 | <a href="#">ALA76(CB)</a>   | 2ZKRn |                                                                                                                      | C[ ] ... C[ ] |
| 2ZKRn | <a href="#">CYS75(O)</a>  | 2.22 | <a href="#">ALA76(N)</a>    | 2ZKRn | [D-A-AA]:31.0° [A-D-DD]:94.5° d_planarity:1.3°<br>a_planarity:2.3°, bad a_angle(sp2)                                 | O[ ] ... N[ ] |
| 2ZKRn | <a href="#">CYS75(O)</a>  | 2.75 | <a href="#">ALA76(CA)</a>   | 2ZKRn |                                                                                                                      | O[ ] ... C[ ] |
| 2ZKRn | <a href="#">CYS75(O)</a>  | 4.20 | <a href="#">ALA76(C)</a>    | 2ZKRn |                                                                                                                      | O[ ] ... C[ ] |
| 2ZKRn | <a href="#">CYS75(O)</a>  | 4.75 | <a href="#">ALA76(O)</a>    | 2ZKRn |                                                                                                                      |               |
| 2ZKRn | <a href="#">CYS75(O)</a>  | 3.10 | <a href="#">ALA76(CB)</a>   | 2ZKRn |                                                                                                                      | O[ ] ... C[ ] |
| 2ZKRn | <a href="#">CYS75(CB)</a> | 3.06 | <a href="#">ALA76(N)</a>    | 2ZKRn |                                                                                                                      | C[ ] ... N[ ] |
| 2ZKRn | <a href="#">CYS75(CB)</a> | 4.40 | <a href="#">ALA76(CA)</a>   | 2ZKRn |                                                                                                                      | C[ ] ... C[ ] |
| 2ZKRn | <a href="#">CYS75(SG)</a> | 4.59 | <a href="#">ALA76(N)</a>    | 2ZKRn | [D-A-AA]:24.1° [A-D-DD]:163.2° d_planarity:-85.2°,<br>maximum distance exceeded, bad a_angle(sp3), bad d_planarity   |               |
| 2ZKRn | <a href="#">CYS75(C)</a>  | 4.76 | <a href="#">ARG77(N)</a>    | 2ZKRn |                                                                                                                      |               |
| 2ZKRn | <a href="#">CYS75(C)</a>  | 4.73 | <a href="#">LEU104(CD1)</a> | 2ZKRn |                                                                                                                      |               |

|       |                           |      |                             |       |                                                                                       |               |
|-------|---------------------------|------|-----------------------------|-------|---------------------------------------------------------------------------------------|---------------|
| 2ZKRn | <a href="#">CYS75(O)</a>  | 4.35 | <a href="#">LEU104(CD1)</a> | 2ZKRn |                                                                                       | O[ ] ... C[ ] |
| 2ZKRn | <a href="#">CYS75(CB)</a> | 4.17 | <a href="#">LEU104(O)</a>   | 2ZKRn |                                                                                       | C[ ] ... O[ ] |
| 2ZKRn | <a href="#">CYS75(SG)</a> | 4.96 | <a href="#">LEU104(O)</a>   | 2ZKRn |                                                                                       |               |
| 2ZKRn | <a href="#">CYS75(CA)</a> | 4.82 | <a href="#">ARG107(CG)</a>  | 2ZKRn |                                                                                       |               |
| 2ZKRn | <a href="#">CYS75(CA)</a> | 4.58 | <a href="#">ARG107(CD)</a>  | 2ZKRn |                                                                                       |               |
| 2ZKRn | <a href="#">CYS75(C)</a>  | 4.71 | <a href="#">ARG107(CD)</a>  | 2ZKRn |                                                                                       |               |
| 2ZKRn | <a href="#">CYS75(CB)</a> | 4.12 | <a href="#">ARG107(C)</a>   | 2ZKRn |                                                                                       | C[ ] ... C[ ] |
| 2ZKRn | <a href="#">CYS75(CB)</a> | 4.19 | <a href="#">ARG107(O)</a>   | 2ZKRn |                                                                                       | C[ ] ... O[ ] |
| 2ZKRn | <a href="#">CYS75(CB)</a> | 4.54 | <a href="#">ARG107(CB)</a>  | 2ZKRn |                                                                                       |               |
| 2ZKRn | <a href="#">CYS75(CB)</a> | 3.76 | <a href="#">ARG107(CG)</a>  | 2ZKRn |                                                                                       | C[ ] ... C[ ] |
| 2ZKRn | <a href="#">CYS75(CB)</a> | 3.97 | <a href="#">ARG107(CD)</a>  | 2ZKRn |                                                                                       | C[ ] ... C[ ] |
| 2ZKRn | <a href="#">CYS75(SG)</a> | 4.41 | <a href="#">ARG107(CA)</a>  | 2ZKRn |                                                                                       | S[ ] ... C[ ] |
| 2ZKRn | <a href="#">CYS75(SG)</a> | 3.38 | <a href="#">ARG107(C)</a>   | 2ZKRn |                                                                                       | S[ ] ... C[ ] |
| 2ZKRn | <a href="#">CYS75(SG)</a> | 2.97 | <a href="#">ARG107(O)</a>   | 2ZKRn |                                                                                       | S[ ] ... O[ ] |
| 2ZKRn | <a href="#">CYS75(SG)</a> | 4.11 | <a href="#">ARG107(CB)</a>  | 2ZKRn |                                                                                       | S[ ] ... C[ ] |
| 2ZKRn | <a href="#">CYS75(SG)</a> | 3.97 | <a href="#">ARG107(CG)</a>  | 2ZKRn | Positive                                                                              | S[ ] ... C[ ] |
| 2ZKRn | <a href="#">CYS75(SG)</a> | 4.39 | <a href="#">ARG107(CD)</a>  | 2ZKRn |                                                                                       | S[ ] ... C[ ] |
| 2ZKRn | <a href="#">CYS75(CB)</a> | 3.78 | <a href="#">LEU108(N)</a>   | 2ZKRn |                                                                                       | C[ ] ... N[ ] |
| 2ZKRn | <a href="#">CYS75(CB)</a> | 3.78 | <a href="#">LEU108(CA)</a>  | 2ZKRn |                                                                                       | C[ ] ... C[ ] |
| 2ZKRn | <a href="#">CYS75(CB)</a> | 4.25 | <a href="#">LEU108(CB)</a>  | 2ZKRn |                                                                                       | C[ ] ... C[ ] |
| 2ZKRn | <a href="#">CYS75(CB)</a> | 4.72 | <a href="#">LEU108(CG)</a>  | 2ZKRn |                                                                                       |               |
| 2ZKRn | <a href="#">CYS75(SG)</a> | 3.52 | <a href="#">LEU108(N)</a>   | 2ZKRn | [D-A-AA]:84.2° [A-D-DD]:78.0° d_planarity:61.1°,<br>bad d_angle(sp2), bad d_planarity | S[ ] ... N[ ] |
| 2ZKRn | <a href="#">CYS75(SG)</a> | 3.52 | <a href="#">LEU108(CA)</a>  | 2ZKRn |                                                                                       | S[ ] ... C[ ] |
| 2ZKRn | <a href="#">CYS75(SG)</a> | 4.37 | <a href="#">LEU108(C)</a>   | 2ZKRn |                                                                                       | S[ ] ... C[ ] |
| 2ZKRn | <a href="#">CYS75(SG)</a> | 4.32 | <a href="#">LEU108(O)</a>   | 2ZKRn |                                                                                       | S[ ] ... O[ ] |
| 2ZKRn | <a href="#">CYS75(SG)</a> | 4.55 | <a href="#">LEU108(CB)</a>  | 2ZKRn |                                                                                       |               |
| 2ZKRn | <a href="#">CYS75(SG)</a> | 4.71 | <a href="#">PRO138(N)</a>   | 2ZKRn |                                                                                       |               |
| 2ZKRn | <a href="#">CYS75(SG)</a> | 4.51 | <a href="#">PRO138(CA)</a>  | 2ZKRn |                                                                                       |               |
| 2ZKRn | <a href="#">CYS75(SG)</a> | 4.27 | <a href="#">PRO138(CB)</a>  | 2ZKRn |                                                                                       | S[ ] ... C[ ] |
| 2ZKRn | <a href="#">CYS75(SG)</a> | 3.73 | <a href="#">PRO138(CG)</a>  | 2ZKRn |                                                                                       | S[ ] ... C[ ] |
| 2ZKRn | <a href="#">CYS75(SG)</a> | 4.47 | <a href="#">PRO138(CD)</a>  | 2ZKRn |                                                                                       | S[ ] ... C[ ] |

| chain1 | res1/atm1                 | distance | res2/atm2                  | chain2 | H-bonding                                                                                                                               | Charge interaction |
|--------|---------------------------|----------|----------------------------|--------|-----------------------------------------------------------------------------------------------------------------------------------------|--------------------|
| 2ZKRn  | <a href="#">CYS99(CA)</a> | 4.94     | <a href="#">ARG77(CZ)</a>  | 2ZKRn  |                                                                                                                                         |                    |
| 2ZKRn  | <a href="#">CYS99(CA)</a> | 4.88     | <a href="#">ARG77(NH1)</a> | 2ZKRn  |                                                                                                                                         |                    |
| 2ZKRn  | <a href="#">CYS99(CA)</a> | 4.48     | <a href="#">ARG77(NH2)</a> | 2ZKRn  |                                                                                                                                         | C[ ] ... N[+]      |
| 2ZKRn  | <a href="#">CYS99(C)</a>  | 4.55     | <a href="#">ARG77(NE)</a>  | 2ZKRn  |                                                                                                                                         |                    |
| 2ZKRn  | <a href="#">CYS99(C)</a>  | 3.68     | <a href="#">ARG77(CZ)</a>  | 2ZKRn  |                                                                                                                                         | C[ ] ... C[ ]      |
| 2ZKRn  | <a href="#">CYS99(C)</a>  | 3.71     | <a href="#">ARG77(NH1)</a> | 2ZKRn  |                                                                                                                                         | C[ ] ... N[+]      |
| 2ZKRn  | <a href="#">CYS99(C)</a>  | 3.46     | <a href="#">ARG77(NH2)</a> | 2ZKRn  |                                                                                                                                         | C[ ] ... N[+]      |
| 2ZKRn  | <a href="#">CYS99(O)</a>  | 4.96     | <a href="#">ARG77(CD)</a>  | 2ZKRn  |                                                                                                                                         |                    |
| 2ZKRn  | <a href="#">CYS99(O)</a>  | 3.89     | <a href="#">ARG77(NE)</a>  | 2ZKRn  | [D-A-AA]:114.5° [A-D-DD]:50.6° d_planarity:-66.2°<br>a_planarity:35.5°, maximum distance exceeded,<br>bad d_angle(sp2), bad d_planarity | O[ ] ... N[ ]      |
| 2ZKRn  | <a href="#">CYS99(O)</a>  | 3.22     | <a href="#">ARG77(CZ)</a>  | 2ZKRn  |                                                                                                                                         | O[ ] ... C[ ]      |
| 2ZKRn  | <a href="#">CYS99(O)</a>  | 3.68     | <a href="#">ARG77(NH1)</a> | 2ZKRn  | [D-A-AA]:81.7° [A-D-DD]:59.5° d_planarity:62.3°                                                                                         | O[ ] ... N[+]      |

|       |           |      |            |       |                                                                                                                    |               |
|-------|-----------|------|------------|-------|--------------------------------------------------------------------------------------------------------------------|---------------|
|       |           |      |            |       | a_planarity:46.9°, maximum distance exceeded, bad a_angle(sp2), bad d_angle(sp2), bad d_planarity                  |               |
| 2ZKRn | CYS99(O)  | 2.84 | ARG77(NH2) | 2ZKRn | [D-A-AA]:110.2° [A-D-DD]:94.9° d_planarity:84.0°<br>a_planarity:73.0°, bad d_planarity                             | O[ ] ... N[+] |
| 2ZKRn | CYS99(CB) | 4.84 | ARG77(NH1) | 2ZKRn |                                                                                                                    |               |
| 2ZKRn | CYS99(CB) | 4.42 | ARG77(NH2) | 2ZKRn | Positive                                                                                                           | C[ ] ... N[+] |
| 2ZKRn | CYS99(SG) | 4.01 | ARG77(NH2) | 2ZKRn | [D-A-AA]:90.4° [A-D-DD]:134.2° d_planarity:31.7°, maximum distance exceeded                                        | S[ ] ... N[+] |
| 2ZKRn | CYS99(CA) | 4.50 | LEU82(CD1) | 2ZKRn |                                                                                                                    | C[ ] ... C[ ] |
| 2ZKRn | CYS99(C)  | 4.39 | LEU82(CD1) | 2ZKRn |                                                                                                                    | C[ ] ... C[ ] |
| 2ZKRn | CYS99(O)  | 4.60 | LEU82(CD1) | 2ZKRn |                                                                                                                    |               |
| 2ZKRn | CYS99(CB) | 4.76 | LEU82(CG)  | 2ZKRn |                                                                                                                    |               |
| 2ZKRn | CYS99(CB) | 3.41 | LEU82(CD1) | 2ZKRn |                                                                                                                    | C[ ] ... C[ ] |
| 2ZKRn | CYS99(CB) | 4.96 | LEU82(CD2) | 2ZKRn |                                                                                                                    |               |
| 2ZKRn | CYS99(SG) | 4.65 | LEU82(CG)  | 2ZKRn |                                                                                                                    |               |
| 2ZKRn | CYS99(SG) | 3.15 | LEU82(CD1) | 2ZKRn |                                                                                                                    | S[ ] ... C[ ] |
| 2ZKRn | CYS99(O)  | 4.95 | TYR85(CD1) | 2ZKRn |                                                                                                                    |               |
| 2ZKRn | CYS99(O)  | 4.46 | TYR85(CE1) | 2ZKRn |                                                                                                                    | O[ ] ... C[ ] |
| 2ZKRn | CYS99(SG) | 4.60 | TYR85(CD1) | 2ZKRn |                                                                                                                    |               |
| 2ZKRn | CYS99(SG) | 4.94 | TYR85(CE1) | 2ZKRn |                                                                                                                    |               |
| 2ZKRn | CYS99(N)  | 4.94 | TYR94(O)   | 2ZKRn | [D-A-AA]:138.7° [A-D-DD]:152.2° d_planarity:-31.0°<br>a_planarity:12.8°, maximum distance exceeded                 |               |
| 2ZKRn | CYS99(N)  | 4.15 | ALA95(C)   | 2ZKRn |                                                                                                                    | N[ ] ... C[ ] |
| 2ZKRn | CYS99(N)  | 2.97 | ALA95(O)   | 2ZKRn | <b>H-bond</b> [D-A-AA]:159.9° [A-D-DD]:113.0° d_planarity:-12.0°<br>a_planarity:89.8°                              | N[ ] ... O[ ] |
| 2ZKRn | CYS99(CA) | 3.79 | ALA95(O)   | 2ZKRn |                                                                                                                    | C[ ] ... O[ ] |
| 2ZKRn | CYS99(C)  | 4.86 | ALA95(O)   | 2ZKRn |                                                                                                                    |               |
| 2ZKRn | CYS99(CB) | 4.53 | ALA95(C)   | 2ZKRn |                                                                                                                    |               |
| 2ZKRn | CYS99(CB) | 3.40 | ALA95(O)   | 2ZKRn |                                                                                                                    | C[ ] ... O[ ] |
| 2ZKRn | CYS99(N)  | 4.93 | ALA96(N)   | 2ZKRn |                                                                                                                    |               |
| 2ZKRn | CYS99(N)  | 4.79 | ALA96(CA)  | 2ZKRn |                                                                                                                    |               |
| 2ZKRn | CYS99(N)  | 4.02 | ALA96(C)   | 2ZKRn |                                                                                                                    | N[ ] ... C[ ] |
| 2ZKRn | CYS99(N)  | 3.35 | ALA96(O)   | 2ZKRn | [D-A-AA]:114.5° [A-D-DD]:97.9° d_planarity:-73.1°<br>a_planarity:88.5°, bad d_planarity                            | N[ ] ... O[ ] |
| 2ZKRn | CYS99(CA) | 4.74 | ALA96(C)   | 2ZKRn |                                                                                                                    |               |
| 2ZKRn | CYS99(CA) | 3.84 | ALA96(O)   | 2ZKRn |                                                                                                                    | C[ ] ... O[ ] |
| 2ZKRn | CYS99(C)  | 4.92 | ALA96(C)   | 2ZKRn |                                                                                                                    |               |
| 2ZKRn | CYS99(C)  | 3.79 | ALA96(O)   | 2ZKRn |                                                                                                                    | C[ ] ... O[ ] |
| 2ZKRn | CYS99(O)  | 4.93 | ALA96(O)   | 2ZKRn |                                                                                                                    |               |
| 2ZKRn | CYS99(CB) | 4.82 | ALA96(CA)  | 2ZKRn |                                                                                                                    |               |
| 2ZKRn | CYS99(CB) | 4.69 | ALA96(C)   | 2ZKRn |                                                                                                                    |               |
| 2ZKRn | CYS99(CB) | 3.96 | ALA96(O)   | 2ZKRn |                                                                                                                    | C[ ] ... O[ ] |
| 2ZKRn | CYS99(N)  | 4.62 | ALA97(N)   | 2ZKRn |                                                                                                                    |               |
| 2ZKRn | CYS99(N)  | 4.71 | ALA97(CA)  | 2ZKRn |                                                                                                                    |               |
| 2ZKRn | CYS99(N)  | 3.61 | ALA97(C)   | 2ZKRn |                                                                                                                    | N[ ] ... C[ ] |
| 2ZKRn | CYS99(N)  | 3.75 | ALA97(O)   | 2ZKRn | [D-A-AA]:73.8° [A-D-DD]:121.1° d_planarity:53.0°<br>a_planarity:46.3°, maximum distance exceeded, bad a_angle(sp2) | N[ ] ... O[ ] |
| 2ZKRn | CYS99(CA) | 4.77 | ALA97(C)   | 2ZKRn |                                                                                                                    |               |
| 2ZKRn | CYS99(CA) | 4.68 | ALA97(O)   | 2ZKRn |                                                                                                                    |               |
| 2ZKRn | CYS99(C)  | 4.81 | ALA97(C)   | 2ZKRn |                                                                                                                    |               |



|       |                           |      |                             |       |                                                                                                     |                 |
|-------|---------------------------|------|-----------------------------|-------|-----------------------------------------------------------------------------------------------------|-----------------|
| 2ZKRn | <a href="#">CYS99(C)</a>  | 4.39 | <a href="#">ALA97(O)</a>    | 2ZKRn |                                                                                                     | C [ ] ... O [ ] |
| 2ZKRn | <a href="#">CYS99(N)</a>  | 3.05 | <a href="#">TYR98(N)</a>    | 2ZKRn |                                                                                                     | N [ ] ... N [ ] |
| 2ZKRn | <a href="#">CYS99(N)</a>  | 2.47 | <a href="#">TYR98(CA)</a>   | 2ZKRn |                                                                                                     | N [ ] ... C [ ] |
| 2ZKRn | <a href="#">CYS99(N)</a>  | 2.24 | <a href="#">TYR98(O)</a>    | 2ZKRn | [D-A-AA]:30.5° [A-D-DD]:95.9° d_planarity:3.7°<br>a_planarity:5.5°, <b>bad a_angle(sp2)</b>         | N [ ] ... O [ ] |
| 2ZKRn | <a href="#">CYS99(N)</a>  | 3.02 | <a href="#">TYR98(CB)</a>   | 2ZKRn |                                                                                                     | N [ ] ... C [ ] |
| 2ZKRn | <a href="#">CYS99(N)</a>  | 3.56 | <a href="#">TYR98(CG)</a>   | 2ZKRn |                                                                                                     | N [ ] ... C [ ] |
| 2ZKRn | <a href="#">CYS99(N)</a>  | 4.70 | <a href="#">TYR98(CD1)</a>  | 2ZKRn |                                                                                                     |                 |
| 2ZKRn | <a href="#">CYS99(N)</a>  | 3.44 | <a href="#">TYR98(CD2)</a>  | 2ZKRn |                                                                                                     | N [ ] ... C [ ] |
| 2ZKRn | <a href="#">CYS99(N)</a>  | 4.67 | <a href="#">TYR98(CE2)</a>  | 2ZKRn |                                                                                                     |                 |
| 2ZKRn | <a href="#">CYS99(CA)</a> | 4.43 | <a href="#">TYR98(N)</a>    | 2ZKRn |                                                                                                     | C [ ] ... N [ ] |
| 2ZKRn | <a href="#">CYS99(CA)</a> | 3.86 | <a href="#">TYR98(CA)</a>   | 2ZKRn |                                                                                                     | C [ ] ... C [ ] |
| 2ZKRn | <a href="#">CYS99(CA)</a> | 2.47 | <a href="#">TYR98(C)</a>    | 2ZKRn |                                                                                                     | C [ ] ... C [ ] |
| 2ZKRn | <a href="#">CYS99(CA)</a> | 2.80 | <a href="#">TYR98(O)</a>    | 2ZKRn |                                                                                                     | C [ ] ... O [ ] |
| 2ZKRn | <a href="#">CYS99(CA)</a> | 4.39 | <a href="#">TYR98(CB)</a>   | 2ZKRn |                                                                                                     | C [ ] ... C [ ] |
| 2ZKRn | <a href="#">CYS99(CA)</a> | 4.66 | <a href="#">TYR98(CG)</a>   | 2ZKRn |                                                                                                     |                 |
| 2ZKRn | <a href="#">CYS99(CA)</a> | 4.17 | <a href="#">TYR98(CD2)</a>  | 2ZKRn |                                                                                                     | C [ ] ... C [ ] |
| 2ZKRn | <a href="#">CYS99(C)</a>  | 4.89 | <a href="#">TYR98(N)</a>    | 2ZKRn |                                                                                                     |                 |
| 2ZKRn | <a href="#">CYS99(C)</a>  | 4.49 | <a href="#">TYR98(CA)</a>   | 2ZKRn |                                                                                                     | C [ ] ... C [ ] |
| 2ZKRn | <a href="#">CYS99(C)</a>  | 3.02 | <a href="#">TYR98(C)</a>    | 2ZKRn |                                                                                                     | C [ ] ... C [ ] |
| 2ZKRn | <a href="#">CYS99(C)</a>  | 2.81 | <a href="#">TYR98(O)</a>    | 2ZKRn |                                                                                                     | C [ ] ... O [ ] |
| 2ZKRn | <a href="#">CYS99(O)</a>  | 3.95 | <a href="#">TYR98(C)</a>    | 2ZKRn |                                                                                                     | O [ ] ... C [ ] |
| 2ZKRn | <a href="#">CYS99(O)</a>  | 3.46 | <a href="#">TYR98(O)</a>    | 2ZKRn |                                                                                                     | O [ ] ... O [ ] |
| 2ZKRn | <a href="#">CYS99(CB)</a> | 4.88 | <a href="#">TYR98(CA)</a>   | 2ZKRn |                                                                                                     |                 |
| 2ZKRn | <a href="#">CYS99(CB)</a> | 3.73 | <a href="#">TYR98(C)</a>    | 2ZKRn |                                                                                                     | C [ ] ... C [ ] |
| 2ZKRn | <a href="#">CYS99(CB)</a> | 4.28 | <a href="#">TYR98(O)</a>    | 2ZKRn |                                                                                                     | C [ ] ... O [ ] |
| 2ZKRn | <a href="#">CYS99(CB)</a> | 4.90 | <a href="#">TYR98(CD2)</a>  | 2ZKRn |                                                                                                     |                 |
| 2ZKRn | <a href="#">CYS99(N)</a>  | 2.83 | <a href="#">THR100(N)</a>   | 2ZKRn |                                                                                                     | N [ ] ... N [ ] |
| 2ZKRn | <a href="#">CYS99(N)</a>  | 4.18 | <a href="#">THR100(CA)</a>  | 2ZKRn |                                                                                                     | N [ ] ... C [ ] |
| 2ZKRn | <a href="#">CYS99(N)</a>  | 4.69 | <a href="#">THR100(C)</a>   | 2ZKRn |                                                                                                     |                 |
| 2ZKRn | <a href="#">CYS99(N)</a>  | 4.93 | <a href="#">THR100(CB)</a>  | 2ZKRn |                                                                                                     |                 |
| 2ZKRn | <a href="#">CYS99(CA)</a> | 2.46 | <a href="#">THR100(N)</a>   | 2ZKRn |                                                                                                     | C [ ] ... N [ ] |
| 2ZKRn | <a href="#">CYS99(CA)</a> | 3.84 | <a href="#">THR100(CA)</a>  | 2ZKRn |                                                                                                     | C [ ] ... C [ ] |
| 2ZKRn | <a href="#">CYS99(CA)</a> | 4.44 | <a href="#">THR100(C)</a>   | 2ZKRn |                                                                                                     | C [ ] ... C [ ] |
| 2ZKRn | <a href="#">CYS99(CA)</a> | 4.90 | <a href="#">THR100(CB)</a>  | 2ZKRn |                                                                                                     |                 |
| 2ZKRn | <a href="#">CYS99(C)</a>  | 2.48 | <a href="#">THR100(CA)</a>  | 2ZKRn |                                                                                                     | C [ ] ... C [ ] |
| 2ZKRn | <a href="#">CYS99(C)</a>  | 3.11 | <a href="#">THR100(C)</a>   | 2ZKRn |                                                                                                     | C [ ] ... C [ ] |
| 2ZKRn | <a href="#">CYS99(C)</a>  | 3.77 | <a href="#">THR100(O)</a>   | 2ZKRn |                                                                                                     | C [ ] ... O [ ] |
| 2ZKRn | <a href="#">CYS99(C)</a>  | 3.76 | <a href="#">THR100(CB)</a>  | 2ZKRn |                                                                                                     | C [ ] ... C [ ] |
| 2ZKRn | <a href="#">CYS99(C)</a>  | 4.02 | <a href="#">THR100(OG1)</a> | 2ZKRn |                                                                                                     | C [ ] ... O [ ] |
| 2ZKRn | <a href="#">CYS99(O)</a>  | 2.24 | <a href="#">THR100(N)</a>   | 2ZKRn | [D-A-AA]:30.7° [A-D-DD]:96.9° d_planarity:5.8°<br>a_planarity:2.0°, <b>bad a_angle(sp2)</b>         | O [ ] ... N [ ] |
| 2ZKRn | <a href="#">CYS99(O)</a>  | 2.82 | <a href="#">THR100(CA)</a>  | 2ZKRn |                                                                                                     | O [ ] ... C [ ] |
| 2ZKRn | <a href="#">CYS99(O)</a>  | 3.10 | <a href="#">THR100(C)</a>   | 2ZKRn |                                                                                                     | O [ ] ... C [ ] |
| 2ZKRn | <a href="#">CYS99(O)</a>  | 3.34 | <a href="#">THR100(O)</a>   | 2ZKRn |                                                                                                     | O [ ] ... O [ ] |
| 2ZKRn | <a href="#">CYS99(O)</a>  | 4.30 | <a href="#">THR100(CB)</a>  | 2ZKRn |                                                                                                     | O [ ] ... C [ ] |
| 2ZKRn | <a href="#">CYS99(O)</a>  | 4.64 | <a href="#">THR100(OG1)</a> | 2ZKRn | [D-A-AA]:53.3° [A-D-DD]:67.3° a_planarity:19.1°, <b>maximum distance exceeded, bad a_angle(sp2)</b> |                 |
| 2ZKRn | <a href="#">CYS99(CB)</a> | 3.30 | <a href="#">THR100(N)</a>   | 2ZKRn |                                                                                                     | C [ ] ... N [ ] |
| 2ZKRn | <a href="#">CYS99(CB)</a> | 4.70 | <a href="#">THR100(CA)</a>  | 2ZKRn |                                                                                                     |                 |

|       |                           |      |                             |       |                                                                                                                        |               |
|-------|---------------------------|------|-----------------------------|-------|------------------------------------------------------------------------------------------------------------------------|---------------|
| 2ZKRn | <a href="#">CYS99(SG)</a> | 4.48 | <a href="#">THR100(N)</a>   | 2ZKRn | [D-A-AA]:39.7° [A-D-DD]:141.6° d_planarity:38.9°, <b>maximum distance exceeded, bad a_angle(sp3)</b>                   | S[ ] ... N[ ] |
| 2ZKRn | <a href="#">CYS99(N)</a>  | 4.47 | <a href="#">GLY101(N)</a>   | 2ZKRn |                                                                                                                        | N[ ] ... N[ ] |
| 2ZKRn | <a href="#">CYS99(CA)</a> | 4.61 | <a href="#">GLY101(N)</a>   | 2ZKRn |                                                                                                                        |               |
| 2ZKRn | <a href="#">CYS99(C)</a>  | 3.60 | <a href="#">GLY101(N)</a>   | 2ZKRn |                                                                                                                        | C[ ] ... N[ ] |
| 2ZKRn | <a href="#">CYS99(C)</a>  | 4.66 | <a href="#">GLY101(CA)</a>  | 2ZKRn |                                                                                                                        |               |
| 2ZKRn | <a href="#">CYS99(C)</a>  | 4.65 | <a href="#">GLY101(C)</a>   | 2ZKRn |                                                                                                                        |               |
| 2ZKRn | <a href="#">CYS99(O)</a>  | 3.82 | <a href="#">GLY101(N)</a>   | 2ZKRn | [D-A-AA]:70.3° [A-D-DD]:116.6° d_planarity:55.3° a_planarity:50.6°, <b>maximum distance exceeded, bad a_angle(sp2)</b> | O[ ] ... N[ ] |
| 2ZKRn | <a href="#">CYS99(O)</a>  | 4.66 | <a href="#">GLY101(CA)</a>  | 2ZKRn |                                                                                                                        |               |
| 2ZKRn | <a href="#">CYS99(O)</a>  | 4.31 | <a href="#">GLY101(C)</a>   | 2ZKRn |                                                                                                                        | O[ ] ... C[ ] |
| 2ZKRn | <a href="#">CYS99(N)</a>  | 4.80 | <a href="#">LEU102(N)</a>   | 2ZKRn |                                                                                                                        |               |
| 2ZKRn | <a href="#">CYS99(N)</a>  | 3.85 | <a href="#">LEU102(CD1)</a> | 2ZKRn |                                                                                                                        | N[ ] ... C[ ] |
| 2ZKRn | <a href="#">CYS99(CA)</a> | 4.54 | <a href="#">LEU102(N)</a>   | 2ZKRn |                                                                                                                        |               |
| 2ZKRn | <a href="#">CYS99(CA)</a> | 4.55 | <a href="#">LEU102(CB)</a>  | 2ZKRn |                                                                                                                        |               |
| 2ZKRn | <a href="#">CYS99(CA)</a> | 4.82 | <a href="#">LEU102(CG)</a>  | 2ZKRn |                                                                                                                        |               |
| 2ZKRn | <a href="#">CYS99(CA)</a> | 3.83 | <a href="#">LEU102(CD1)</a> | 2ZKRn |                                                                                                                        | C[ ] ... C[ ] |
| 2ZKRn | <a href="#">CYS99(C)</a>  | 3.90 | <a href="#">LEU102(N)</a>   | 2ZKRn |                                                                                                                        | C[ ] ... N[ ] |
| 2ZKRn | <a href="#">CYS99(C)</a>  | 4.59 | <a href="#">LEU102(CA)</a>  | 2ZKRn |                                                                                                                        |               |
| 2ZKRn | <a href="#">CYS99(C)</a>  | 4.92 | <a href="#">LEU102(C)</a>   | 2ZKRn |                                                                                                                        |               |
| 2ZKRn | <a href="#">CYS99(C)</a>  | 4.42 | <a href="#">LEU102(CB)</a>  | 2ZKRn |                                                                                                                        | C[ ] ... C[ ] |
| 2ZKRn | <a href="#">CYS99(C)</a>  | 4.32 | <a href="#">LEU102(CD1)</a> | 2ZKRn |                                                                                                                        | C[ ] ... C[ ] |
| 2ZKRn | <a href="#">CYS99(O)</a>  | 3.51 | <a href="#">LEU102(N)</a>   | 2ZKRn | [D-A-AA]:98.8° [A-D-DD]:94.5° d_planarity:-52.7° a_planarity:88.9°, <b>maximum distance exceeded</b>                   | O[ ] ... N[ ] |
| 2ZKRn | <a href="#">CYS99(O)</a>  | 3.92 | <a href="#">LEU102(CA)</a>  | 2ZKRn |                                                                                                                        | O[ ] ... C[ ] |
| 2ZKRn | <a href="#">CYS99(O)</a>  | 3.96 | <a href="#">LEU102(C)</a>   | 2ZKRn |                                                                                                                        | O[ ] ... C[ ] |
| 2ZKRn | <a href="#">CYS99(O)</a>  | 3.77 | <a href="#">LEU102(CB)</a>  | 2ZKRn |                                                                                                                        | O[ ] ... C[ ] |
| 2ZKRn | <a href="#">CYS99(O)</a>  | 4.76 | <a href="#">LEU102(CG)</a>  | 2ZKRn |                                                                                                                        |               |
| 2ZKRn | <a href="#">CYS99(O)</a>  | 4.36 | <a href="#">LEU102(CD1)</a> | 2ZKRn |                                                                                                                        | O[ ] ... C[ ] |
| 2ZKRn | <a href="#">CYS99(C)</a>  | 4.18 | <a href="#">LEU103(N)</a>   | 2ZKRn |                                                                                                                        | C[ ] ... N[ ] |
| 2ZKRn | <a href="#">CYS99(C)</a>  | 4.88 | <a href="#">LEU103(CB)</a>  | 2ZKRn |                                                                                                                        |               |
| 2ZKRn | <a href="#">CYS99(O)</a>  | 3.08 | <a href="#">LEU103(N)</a>   | 2ZKRn | <b>H-bond</b> [D-A-AA]:148.3° [A-D-DD]:118.0° d_planarity:-17.9° a_planarity:74.7°                                     | O[ ] ... N[ ] |
| 2ZKRn | <a href="#">CYS99(O)</a>  | 3.97 | <a href="#">LEU103(CA)</a>  | 2ZKRn |                                                                                                                        | O[ ] ... C[ ] |
| 2ZKRn | <a href="#">CYS99(O)</a>  | 3.73 | <a href="#">LEU103(CB)</a>  | 2ZKRn |                                                                                                                        | O[ ] ... C[ ] |
| 2ZKRn | <a href="#">CYS99(CB)</a> | 4.51 | <a href="#">HIS194(CD2)</a> | 2ZKRn |                                                                                                                        |               |
| 2ZKRn | <a href="#">CYS99(CB)</a> | 4.09 | <a href="#">HIS194(NE2)</a> | 2ZKRn |                                                                                                                        | C[ ] ... N[ ] |
| 2ZKRn | <a href="#">CYS99(SG)</a> | 4.51 | <a href="#">HIS194(NE2)</a> | 2ZKRn |                                                                                                                        |               |
| 2ZKRn | <a href="#">CYS99(N)</a>  | 4.34 | <a href="#">TYR239(CE1)</a> | 2ZKRn |                                                                                                                        | N[ ] ... C[ ] |
| 2ZKRn | <a href="#">CYS99(CA)</a> | 4.68 | <a href="#">TYR239(CE1)</a> | 2ZKRn |                                                                                                                        |               |
| 2ZKRn | <a href="#">CYS99(CB)</a> | 4.43 | <a href="#">TYR239(CD1)</a> | 2ZKRn |                                                                                                                        | C[ ] ... C[ ] |
| 2ZKRn | <a href="#">CYS99(CB)</a> | 4.23 | <a href="#">TYR239(CE1)</a> | 2ZKRn |                                                                                                                        | C[ ] ... C[ ] |
| 2ZKRn | <a href="#">CYS99(SG)</a> | 4.93 | <a href="#">TYR239(CD1)</a> | 2ZKRn |                                                                                                                        |               |
| 2ZKRn | <a href="#">CYS99(SG)</a> | 4.80 | <a href="#">TYR239(CE1)</a> | 2ZKRn |                                                                                                                        |               |
| 2ZKRn | <a href="#">CYS99(SG)</a> | 4.90 | <a href="#">ALA242(CA)</a>  | 2ZKRn |                                                                                                                        |               |
| 2ZKRn | <a href="#">CYS99(SG)</a> | 4.32 | <a href="#">ALA242(C)</a>   | 2ZKRn |                                                                                                                        | S[ ] ... C[ ] |
| 2ZKRn | <a href="#">CYS99(SG)</a> | 4.46 | <a href="#">ALA242(O)</a>   | 2ZKRn |                                                                                                                        | S[ ] ... O[ ] |
| 2ZKRn | <a href="#">CYS99(SG)</a> | 4.18 | <a href="#">ALA242(CB)</a>  | 2ZKRn |                                                                                                                        | S[ ] ... C[ ] |
| 2ZKRn | <a href="#">CYS99(SG)</a> | 4.34 | <a href="#">HIS243(N)</a>   | 2ZKRn | [D-A-AA]:130.0° [A-D-DD]:94.0° d_planarity:80.9°, <b>maximum distance exceeded, bad d_planarity</b>                    | S[ ] ... N[ ] |

|       |                           |      |                             |       |  |               |
|-------|---------------------------|------|-----------------------------|-------|--|---------------|
| 2ZKRn | <a href="#">CYS99(SG)</a> | 4.68 | <a href="#">HIS243(CA)</a>  | 2ZKRn |  |               |
| 2ZKRn | <a href="#">CYS99(CA)</a> | 4.83 | <a href="#">ILE246(CD1)</a> | 2ZKRn |  |               |
| 2ZKRn | <a href="#">CYS99(O)</a>  | 4.65 | <a href="#">ILE246(CD1)</a> | 2ZKRn |  |               |
| 2ZKRn | <a href="#">CYS99(SG)</a> | 4.83 | <a href="#">ILE246(CG1)</a> | 2ZKRn |  |               |
| 2ZKRn | <a href="#">CYS99(SG)</a> | 4.07 | <a href="#">ILE246(CG2)</a> | 2ZKRn |  | S[ ] ... C[ ] |
| 2ZKRn | <a href="#">CYS99(SG)</a> | 4.07 | <a href="#">ILE246(CD1)</a> | 2ZKRn |  | S[ ] ... C[ ] |

| chain1 | res1/atm1                 | distance | res2/atm2                  | chain2 | H-bonding                                                                                                                                                     | Charge interaction |
|--------|---------------------------|----------|----------------------------|--------|---------------------------------------------------------------------------------------------------------------------------------------------------------------|--------------------|
| 2ZKQc  | <a href="#">CYS97(SG)</a> | 4.92     | <a href="#">GLY33(O)</a>   | 2ZKQc  |                                                                                                                                                               |                    |
| 2ZKQc  | <a href="#">CYS97(CB)</a> | 3.99     | <a href="#">SER35(OG)</a>  | 2ZKQc  |                                                                                                                                                               | C[ ] ... O[ ]      |
| 2ZKQc  | <a href="#">CYS97(SG)</a> | 4.67     | <a href="#">SER35(CA)</a>  | 2ZKQc  |                                                                                                                                                               |                    |
| 2ZKQc  | <a href="#">CYS97(SG)</a> | 3.90     | <a href="#">SER35(CB)</a>  | 2ZKQc  |                                                                                                                                                               | S[ ] ... C[ ]      |
| 2ZKQc  | <a href="#">CYS97(SG)</a> | 2.95     | <a href="#">SER35(OG)</a>  | 2ZKQc  | <b>H-bond</b> [D-A-AA]:111.3° [A-D-DD]:123.2°                                                                                                                 | S[ ] ... O[ ]      |
| 2ZKQc  | <a href="#">CYS97(CB)</a> | 4.25     | <a href="#">THR53(OG1)</a> | 2ZKQc  |                                                                                                                                                               | C[ ] ... O[ ]      |
| 2ZKQc  | <a href="#">CYS97(SG)</a> | 4.81     | <a href="#">THR53(OG1)</a> | 2ZKQc  | [D-A-AA]:61.3° [A-D-DD]:157.6°, <b>maximum distance exceeded</b>                                                                                              |                    |
| 2ZKQc  | <a href="#">CYS97(CB)</a> | 4.94     | <a href="#">VAL91(CG1)</a> | 2ZKQc  |                                                                                                                                                               |                    |
| 2ZKQc  | <a href="#">CYS97(N)</a>  | 4.99     | <a href="#">THR93(C)</a>   | 2ZKQc  |                                                                                                                                                               |                    |
| 2ZKQc  | <a href="#">CYS97(N)</a>  | 3.97     | <a href="#">THR93(O)</a>   | 2ZKQc  | [D-A-AA]:141.3° [A-D-DD]:132.2° d_planarity:-41.6°<br>a_planarity:13.9°, <b>maximum distance exceeded</b>                                                     | N[ ] ... O[ ]      |
| 2ZKQc  | <a href="#">CYS97(CB)</a> | 4.97     | <a href="#">THR93(O)</a>   | 2ZKQc  |                                                                                                                                                               |                    |
| 2ZKQc  | <a href="#">CYS97(N)</a>  | 4.27     | <a href="#">ARG94(CA)</a>  | 2ZKQc  |                                                                                                                                                               | N[ ] ... C[ ]      |
| 2ZKQc  | <a href="#">CYS97(N)</a>  | 3.52     | <a href="#">ARG94(C)</a>   | 2ZKQc  |                                                                                                                                                               | N[ ] ... C[ ]      |
| 2ZKQc  | <a href="#">CYS97(N)</a>  | 2.85     | <a href="#">ARG94(O)</a>   | 2ZKQc  | <b>H-bond</b> [D-A-AA]:113.6° [A-D-DD]:105.4° d_planarity:-27.9°<br>a_planarity:-89.4°                                                                        | N[ ] ... O[ ]      |
| 2ZKQc  | <a href="#">CYS97(CA)</a> | 4.95     | <a href="#">ARG94(CA)</a>  | 2ZKQc  |                                                                                                                                                               |                    |
| 2ZKQc  | <a href="#">CYS97(CA)</a> | 4.41     | <a href="#">ARG94(C)</a>   | 2ZKQc  |                                                                                                                                                               | C[ ] ... C[ ]      |
| 2ZKQc  | <a href="#">CYS97(CA)</a> | 3.52     | <a href="#">ARG94(O)</a>   | 2ZKQc  |                                                                                                                                                               | C[ ] ... O[ ]      |
| 2ZKQc  | <a href="#">CYS97(C)</a>  | 4.90     | <a href="#">ARG94(C)</a>   | 2ZKQc  |                                                                                                                                                               |                    |
| 2ZKQc  | <a href="#">CYS97(C)</a>  | 3.77     | <a href="#">ARG94(O)</a>   | 2ZKQc  |                                                                                                                                                               | C[ ] ... O[ ]      |
| 2ZKQc  | <a href="#">CYS97(O)</a>  | 4.53     | <a href="#">ARG94(C)</a>   | 2ZKQc  |                                                                                                                                                               |                    |
| 2ZKQc  | <a href="#">CYS97(O)</a>  | 3.32     | <a href="#">ARG94(O)</a>   | 2ZKQc  |                                                                                                                                                               | O[ ] ... O[ ]      |
| 2ZKQc  | <a href="#">CYS97(CB)</a> | 4.46     | <a href="#">ARG94(CA)</a>  | 2ZKQc  |                                                                                                                                                               | C[ ] ... C[ ]      |
| 2ZKQc  | <a href="#">CYS97(CB)</a> | 4.39     | <a href="#">ARG94(C)</a>   | 2ZKQc  |                                                                                                                                                               | C[ ] ... C[ ]      |
| 2ZKQc  | <a href="#">CYS97(CB)</a> | 3.64     | <a href="#">ARG94(O)</a>   | 2ZKQc  |                                                                                                                                                               | C[ ] ... O[ ]      |
| 2ZKQc  | <a href="#">CYS97(N)</a>  | 4.27     | <a href="#">GLY95(N)</a>   | 2ZKQc  |                                                                                                                                                               | N[ ] ... N[ ]      |
| 2ZKQc  | <a href="#">CYS97(N)</a>  | 4.40     | <a href="#">GLY95(CA)</a>  | 2ZKQc  |                                                                                                                                                               | N[ ] ... C[ ]      |
| 2ZKQc  | <a href="#">CYS97(N)</a>  | 3.40     | <a href="#">GLY95(C)</a>   | 2ZKQc  |                                                                                                                                                               | N[ ] ... C[ ]      |
| 2ZKQc  | <a href="#">CYS97(N)</a>  | 3.55     | <a href="#">GLY95(O)</a>   | 2ZKQc  | [D-A-AA]:72.9° [A-D-DD]:133.4° d_planarity:82.7°<br>a_planarity:54.5°, <b>maximum distance exceeded</b> ,<br><b>bad a_angle(sp2)</b> , <b>bad d_planarity</b> | N[ ] ... O[ ]      |
| 2ZKQc  | <a href="#">CYS97(CA)</a> | 4.70     | <a href="#">GLY95(C)</a>   | 2ZKQc  |                                                                                                                                                               |                    |
| 2ZKQc  | <a href="#">CYS97(CA)</a> | 4.67     | <a href="#">GLY95(O)</a>   | 2ZKQc  |                                                                                                                                                               |                    |
| 2ZKQc  | <a href="#">CYS97(C)</a>  | 4.94     | <a href="#">GLY95(C)</a>   | 2ZKQc  |                                                                                                                                                               |                    |
| 2ZKQc  | <a href="#">CYS97(C)</a>  | 4.59     | <a href="#">GLY95(O)</a>   | 2ZKQc  |                                                                                                                                                               |                    |
| 2ZKQc  | <a href="#">CYS97(O)</a>  | 4.92     | <a href="#">GLY95(C)</a>   | 2ZKQc  |                                                                                                                                                               |                    |
| 2ZKQc  | <a href="#">CYS97(O)</a>  | 4.59     | <a href="#">GLY95(O)</a>   | 2ZKQc  |                                                                                                                                                               |                    |

|       |                           |      |                           |       |                                                                                                          |               |
|-------|---------------------------|------|---------------------------|-------|----------------------------------------------------------------------------------------------------------|---------------|
| 2ZKQc | <a href="#">CYS97(N)</a>  | 2.85 | <a href="#">LEU96(N)</a>  | 2ZKQc |                                                                                                          | N[ ] ... N[ ] |
| 2ZKQc | <a href="#">CYS97(N)</a>  | 2.47 | <a href="#">LEU96(CA)</a> | 2ZKQc |                                                                                                          | N[ ] ... C[ ] |
| 2ZKQc | <a href="#">CYS97(N)</a>  | 2.23 | <a href="#">LEU96(O)</a>  | 2ZKQc | [D-A-AA]:31.1° [A-D-DD]:92.9° d_planarity:1.1°<br>a_planarity:1.0°, bad a_angle(sp2)                     | N[ ] ... O[ ] |
| 2ZKQc | <a href="#">CYS97(N)</a>  | 3.32 | <a href="#">LEU96(CB)</a> | 2ZKQc |                                                                                                          | N[ ] ... C[ ] |
| 2ZKQc | <a href="#">CYS97(N)</a>  | 4.68 | <a href="#">LEU96(CG)</a> | 2ZKQc |                                                                                                          |               |
| 2ZKQc | <a href="#">CYS97(CA)</a> | 4.30 | <a href="#">LEU96(N)</a>  | 2ZKQc |                                                                                                          | C[ ] ... N[ ] |
| 2ZKQc | <a href="#">CYS97(CA)</a> | 3.84 | <a href="#">LEU96(CA)</a> | 2ZKQc |                                                                                                          | C[ ] ... C[ ] |
| 2ZKQc | <a href="#">CYS97(CA)</a> | 2.44 | <a href="#">LEU96(C)</a>  | 2ZKQc |                                                                                                          | C[ ] ... C[ ] |
| 2ZKQc | <a href="#">CYS97(CA)</a> | 2.73 | <a href="#">LEU96(O)</a>  | 2ZKQc |                                                                                                          | C[ ] ... O[ ] |
| 2ZKQc | <a href="#">CYS97(CA)</a> | 4.57 | <a href="#">LEU96(CB)</a> | 2ZKQc |                                                                                                          |               |
| 2ZKQc | <a href="#">CYS97(C)</a>  | 4.93 | <a href="#">LEU96(N)</a>  | 2ZKQc |                                                                                                          |               |
| 2ZKQc | <a href="#">CYS97(C)</a>  | 4.59 | <a href="#">LEU96(CA)</a> | 2ZKQc |                                                                                                          |               |
| 2ZKQc | <a href="#">CYS97(C)</a>  | 3.21 | <a href="#">LEU96(C)</a>  | 2ZKQc |                                                                                                          | C[ ] ... C[ ] |
| 2ZKQc | <a href="#">CYS97(C)</a>  | 3.28 | <a href="#">LEU96(O)</a>  | 2ZKQc |                                                                                                          | C[ ] ... O[ ] |
| 2ZKQc | <a href="#">CYS97(O)</a>  | 3.99 | <a href="#">LEU96(C)</a>  | 2ZKQc |                                                                                                          | O[ ] ... C[ ] |
| 2ZKQc | <a href="#">CYS97(O)</a>  | 4.29 | <a href="#">LEU96(O)</a>  | 2ZKQc |                                                                                                          | O[ ] ... O[ ] |
| 2ZKQc | <a href="#">CYS97(CB)</a> | 4.89 | <a href="#">LEU96(CA)</a> | 2ZKQc |                                                                                                          |               |
| 2ZKQc | <a href="#">CYS97(CB)</a> | 3.69 | <a href="#">LEU96(C)</a>  | 2ZKQc |                                                                                                          | C[ ] ... C[ ] |
| 2ZKQc | <a href="#">CYS97(CB)</a> | 4.14 | <a href="#">LEU96(O)</a>  | 2ZKQc |                                                                                                          | C[ ] ... O[ ] |
| 2ZKQc | <a href="#">CYS97(N)</a>  | 3.39 | <a href="#">ALA98(N)</a>  | 2ZKQc |                                                                                                          | N[ ] ... N[ ] |
| 2ZKQc | <a href="#">CYS97(N)</a>  | 4.73 | <a href="#">ALA98(CA)</a> | 2ZKQc |                                                                                                          |               |
| 2ZKQc | <a href="#">CYS97(CA)</a> | 2.43 | <a href="#">ALA98(N)</a>  | 2ZKQc |                                                                                                          | C[ ] ... N[ ] |
| 2ZKQc | <a href="#">CYS97(CA)</a> | 3.81 | <a href="#">ALA98(CA)</a> | 2ZKQc |                                                                                                          | C[ ] ... C[ ] |
| 2ZKQc | <a href="#">CYS97(CA)</a> | 4.28 | <a href="#">ALA98(C)</a>  | 2ZKQc |                                                                                                          | C[ ] ... C[ ] |
| 2ZKQc | <a href="#">CYS97(CA)</a> | 4.84 | <a href="#">ALA98(CB)</a> | 2ZKQc |                                                                                                          |               |
| 2ZKQc | <a href="#">CYS97(C)</a>  | 2.45 | <a href="#">ALA98(CA)</a> | 2ZKQc |                                                                                                          | C[ ] ... C[ ] |
| 2ZKQc | <a href="#">CYS97(C)</a>  | 2.91 | <a href="#">ALA98(C)</a>  | 2ZKQc |                                                                                                          | C[ ] ... C[ ] |
| 2ZKQc | <a href="#">CYS97(C)</a>  | 3.62 | <a href="#">ALA98(O)</a>  | 2ZKQc |                                                                                                          | C[ ] ... O[ ] |
| 2ZKQc | <a href="#">CYS97(C)</a>  | 3.73 | <a href="#">ALA98(CB)</a> | 2ZKQc |                                                                                                          | C[ ] ... C[ ] |
| 2ZKQc | <a href="#">CYS97(O)</a>  | 2.25 | <a href="#">ALA98(N)</a>  | 2ZKQc | [D-A-AA]:30.2° [A-D-DD]:95.2° d_planarity:1.7°<br>a_planarity:8.2°, bad a_angle(sp2)                     | O[ ] ... N[ ] |
| 2ZKQc | <a href="#">CYS97(O)</a>  | 2.79 | <a href="#">ALA98(CA)</a> | 2ZKQc |                                                                                                          | O[ ] ... C[ ] |
| 2ZKQc | <a href="#">CYS97(O)</a>  | 2.75 | <a href="#">ALA98(C)</a>  | 2ZKQc |                                                                                                          | O[ ] ... C[ ] |
| 2ZKQc | <a href="#">CYS97(O)</a>  | 3.05 | <a href="#">ALA98(O)</a>  | 2ZKQc |                                                                                                          | O[ ] ... O[ ] |
| 2ZKQc | <a href="#">CYS97(O)</a>  | 4.28 | <a href="#">ALA98(CB)</a> | 2ZKQc |                                                                                                          | O[ ] ... C[ ] |
| 2ZKQc | <a href="#">CYS97(CB)</a> | 3.53 | <a href="#">ALA98(N)</a>  | 2ZKQc |                                                                                                          | C[ ] ... N[ ] |
| 2ZKQc | <a href="#">CYS97(CB)</a> | 4.72 | <a href="#">ALA98(CA)</a> | 2ZKQc |                                                                                                          |               |
| 2ZKQc | <a href="#">CYS97(CB)</a> | 4.74 | <a href="#">ALA98(C)</a>  | 2ZKQc |                                                                                                          |               |
| 2ZKQc | <a href="#">CYS97(SG)</a> | 3.58 | <a href="#">ALA98(N)</a>  | 2ZKQc | [D-A-AA]:73.6° [A-D-DD]:119.2° d_planarity:69.4°,<br>bad d_planarity                                     | S[ ] ... N[ ] |
| 2ZKQc | <a href="#">CYS97(SG)</a> | 4.47 | <a href="#">ALA98(CA)</a> | 2ZKQc |                                                                                                          | S[ ] ... C[ ] |
| 2ZKQc | <a href="#">CYS97(SG)</a> | 4.19 | <a href="#">ALA98(C)</a>  | 2ZKQc |                                                                                                          | S[ ] ... C[ ] |
| 2ZKQc | <a href="#">CYS97(CA)</a> | 4.29 | <a href="#">ILE99(N)</a>  | 2ZKQc |                                                                                                          | C[ ] ... N[ ] |
| 2ZKQc | <a href="#">CYS97(C)</a>  | 3.24 | <a href="#">ILE99(N)</a>  | 2ZKQc |                                                                                                          | C[ ] ... N[ ] |
| 2ZKQc | <a href="#">CYS97(C)</a>  | 4.43 | <a href="#">ILE99(CA)</a> | 2ZKQc |                                                                                                          | C[ ] ... C[ ] |
| 2ZKQc | <a href="#">CYS97(C)</a>  | 4.64 | <a href="#">ILE99(C)</a>  | 2ZKQc |                                                                                                          |               |
| 2ZKQc | <a href="#">CYS97(O)</a>  | 3.24 | <a href="#">ILE99(N)</a>  | 2ZKQc | [D-A-AA]:78.9° [A-D-DD]:119.5° d_planarity:66.6°<br>a_planarity:56.7°, bad a_angle(sp2), bad d_planarity | O[ ] ... N[ ] |
| 2ZKQc | <a href="#">CYS97(O)</a>  | 4.17 | <a href="#">ILE99(CA)</a> | 2ZKQc |                                                                                                          | O[ ] ... C[ ] |

|       |                           |      |                             |       |                                                                                                                 |               |
|-------|---------------------------|------|-----------------------------|-------|-----------------------------------------------------------------------------------------------------------------|---------------|
| 2ZKQc | <a href="#">CYS97(O)</a>  | 3.98 | <a href="#">ILE99(C)</a>    | 2ZKQc |                                                                                                                 | O[ ] ... C[ ] |
| 2ZKQc | <a href="#">CYS97(O)</a>  | 4.95 | <a href="#">ILE99(O)</a>    | 2ZKQc |                                                                                                                 |               |
| 2ZKQc | <a href="#">CYS97(CB)</a> | 4.40 | <a href="#">ILE99(N)</a>    | 2ZKQc |                                                                                                                 | C[ ] ... N[ ] |
| 2ZKQc | <a href="#">CYS97(SG)</a> | 3.38 | <a href="#">ILE99(N)</a>    | 2ZKQc | <b>H-bond [D-A-AA]:111.9° [A-D-DD]:101.2° d_planarity:-46.2°</b>                                                | S[ ] ... N[ ] |
| 2ZKQc | <a href="#">CYS97(SG)</a> | 3.94 | <a href="#">ILE99(CA)</a>   | 2ZKQc |                                                                                                                 | S[ ] ... C[ ] |
| 2ZKQc | <a href="#">CYS97(SG)</a> | 4.41 | <a href="#">ILE99(C)</a>    | 2ZKQc |                                                                                                                 | S[ ] ... C[ ] |
| 2ZKQc | <a href="#">CYS97(SG)</a> | 3.72 | <a href="#">ILE99(CB)</a>   | 2ZKQc |                                                                                                                 | S[ ] ... C[ ] |
| 2ZKQc | <a href="#">CYS97(SG)</a> | 4.42 | <a href="#">ILE99(CG1)</a>  | 2ZKQc |                                                                                                                 | S[ ] ... C[ ] |
| 2ZKQc | <a href="#">CYS97(SG)</a> | 4.86 | <a href="#">ILE99(CG2)</a>  | 2ZKQc |                                                                                                                 |               |
| 2ZKQc | <a href="#">CYS97(SG)</a> | 4.78 | <a href="#">ILE99(CD1)</a>  | 2ZKQc |                                                                                                                 |               |
| 2ZKQc | <a href="#">CYS97(CA)</a> | 4.77 | <a href="#">ALA100(N)</a>   | 2ZKQc |                                                                                                                 |               |
| 2ZKQc | <a href="#">CYS97(CA)</a> | 4.85 | <a href="#">ALA100(CB)</a>  | 2ZKQc |                                                                                                                 |               |
| 2ZKQc | <a href="#">CYS97(C)</a>  | 3.97 | <a href="#">ALA100(N)</a>   | 2ZKQc |                                                                                                                 | C[ ] ... N[ ] |
| 2ZKQc | <a href="#">CYS97(C)</a>  | 4.70 | <a href="#">ALA100(CA)</a>  | 2ZKQc |                                                                                                                 |               |
| 2ZKQc | <a href="#">CYS97(C)</a>  | 4.98 | <a href="#">ALA100(C)</a>   | 2ZKQc |                                                                                                                 |               |
| 2ZKQc | <a href="#">CYS97(C)</a>  | 4.51 | <a href="#">ALA100(CB)</a>  | 2ZKQc |                                                                                                                 |               |
| 2ZKQc | <a href="#">CYS97(O)</a>  | 3.19 | <a href="#">ALA100(N)</a>   | 2ZKQc | <b>H-bond [D-A-AA]:121.2° [A-D-DD]:97.9° d_planarity:-50.6° a_planarity:89.8°</b>                               | O[ ] ... N[ ] |
| 2ZKQc | <a href="#">CYS97(O)</a>  | 3.68 | <a href="#">ALA100(CA)</a>  | 2ZKQc |                                                                                                                 | O[ ] ... C[ ] |
| 2ZKQc | <a href="#">CYS97(O)</a>  | 3.79 | <a href="#">ALA100(C)</a>   | 2ZKQc |                                                                                                                 | O[ ] ... C[ ] |
| 2ZKQc | <a href="#">CYS97(O)</a>  | 4.99 | <a href="#">ALA100(O)</a>   | 2ZKQc |                                                                                                                 |               |
| 2ZKQc | <a href="#">CYS97(O)</a>  | 3.56 | <a href="#">ALA100(CB)</a>  | 2ZKQc |                                                                                                                 | O[ ] ... C[ ] |
| 2ZKQc | <a href="#">CYS97(CB)</a> | 4.26 | <a href="#">ALA100(N)</a>   | 2ZKQc |                                                                                                                 | C[ ] ... N[ ] |
| 2ZKQc | <a href="#">CYS97(CB)</a> | 4.85 | <a href="#">ALA100(CA)</a>  | 2ZKQc |                                                                                                                 |               |
| 2ZKQc | <a href="#">CYS97(CB)</a> | 4.10 | <a href="#">ALA100(CB)</a>  | 2ZKQc |                                                                                                                 | C[ ] ... C[ ] |
| 2ZKQc | <a href="#">CYS97(SG)</a> | 3.77 | <a href="#">ALA100(N)</a>   | 2ZKQc | <b>H-bond [D-A-AA]:92.5° [A-D-DD]:127.1° d_planarity:-8.4°</b>                                                  | S[ ] ... N[ ] |
| 2ZKQc | <a href="#">CYS97(SG)</a> | 4.78 | <a href="#">ALA100(CA)</a>  | 2ZKQc |                                                                                                                 |               |
| 2ZKQc | <a href="#">CYS97(SG)</a> | 4.51 | <a href="#">ALA100(CB)</a>  | 2ZKQc |                                                                                                                 |               |
| 2ZKQc | <a href="#">CYS97(C)</a>  | 4.17 | <a href="#">GLN101(N)</a>   | 2ZKQc |                                                                                                                 | C[ ] ... N[ ] |
| 2ZKQc | <a href="#">CYS97(C)</a>  | 5.00 | <a href="#">GLN101(CA)</a>  | 2ZKQc |                                                                                                                 |               |
| 2ZKQc | <a href="#">CYS97(C)</a>  | 4.44 | <a href="#">GLN101(CB)</a>  | 2ZKQc |                                                                                                                 | C[ ] ... C[ ] |
| 2ZKQc | <a href="#">CYS97(O)</a>  | 2.97 | <a href="#">GLN101(N)</a>   | 2ZKQc | <b>H-bond [D-A-AA]:163.7° [A-D-DD]:118.0° d_planarity:-5.2° a_planarity:16.6°</b>                               | O[ ] ... N[ ] |
| 2ZKQc | <a href="#">CYS97(O)</a>  | 3.87 | <a href="#">GLN101(CA)</a>  | 2ZKQc |                                                                                                                 | O[ ] ... C[ ] |
| 2ZKQc | <a href="#">CYS97(O)</a>  | 3.55 | <a href="#">GLN101(CB)</a>  | 2ZKQc |                                                                                                                 | O[ ] ... C[ ] |
| 2ZKQc | <a href="#">CYS97(N)</a>  | 4.55 | <a href="#">ASP169(OD2)</a> | 2ZKQc | [D-A-AA]:148.0° [A-D-DD]:38.8° d_planarity:12.3° a_planarity:32.3°, maximum distance exceeded, bad d_angle(sp2) |               |
| 2ZKQc | <a href="#">CYS97(CA)</a> | 4.79 | <a href="#">ASP169(CG)</a>  | 2ZKQc |                                                                                                                 |               |
| 2ZKQc | <a href="#">CYS97(CA)</a> | 3.53 | <a href="#">ASP169(OD2)</a> | 2ZKQc |                                                                                                                 | C[ ] ... O[-] |
| 2ZKQc | <a href="#">CYS97(C)</a>  | 4.70 | <a href="#">ASP169(CG)</a>  | 2ZKQc |                                                                                                                 |               |
| 2ZKQc | <a href="#">CYS97(C)</a>  | 3.67 | <a href="#">ASP169(OD2)</a> | 2ZKQc |                                                                                                                 | C[ ] ... O[-] |
| 2ZKQc | <a href="#">CYS97(O)</a>  | 4.83 | <a href="#">ASP169(OD2)</a> | 2ZKQc |                                                                                                                 |               |
| 2ZKQc | <a href="#">CYS97(CB)</a> | 4.28 | <a href="#">ASP169(OD2)</a> | 2ZKQc |                                                                                                                 | C[ ] ... O[-] |
| 2ZKQc | <a href="#">CYS97(SG)</a> | 4.96 | <a href="#">ASP169(CG)</a>  | 2ZKQc |                                                                                                                 |               |
| 2ZKQc | <a href="#">CYS97(SG)</a> | 3.77 | <a href="#">ASP169(OD2)</a> | 2ZKQc | Negative                                                                                                        | S[ ] ... O[-] |
| 2ZKQc | <a href="#">CYS97(C)</a>  | 4.78 | <a href="#">ILE188(CG1)</a> | 2ZKQc |                                                                                                                 |               |
| 2ZKQc | <a href="#">CYS97(C)</a>  | 4.20 | <a href="#">ILE188(CD1)</a> | 2ZKQc |                                                                                                                 | C[ ] ... C[ ] |
| 2ZKQc | <a href="#">CYS97(O)</a>  | 4.64 | <a href="#">ILE188(CD1)</a> | 2ZKQc |                                                                                                                 |               |

| chain1 | res1/atm1                  | distance | res2/atm2                   | chain2 | H-bonding                                                                                                       | Charge interaction |
|--------|----------------------------|----------|-----------------------------|--------|-----------------------------------------------------------------------------------------------------------------|--------------------|
| 1YY9A  | <a href="#">CYS267(N)</a>  | 5.00     | <a href="#">PHE230(CB)</a>  | 1YY9A  |                                                                                                                 |                    |
| 1YY9A  | <a href="#">CYS267(N)</a>  | 5.00     | <a href="#">PHE230(CD2)</a> | 1YY9A  |                                                                                                                 |                    |
| 1YY9A  | <a href="#">CYS267(SG)</a> | 4.96     | <a href="#">PHE230(CA)</a>  | 1YY9A  |                                                                                                                 |                    |
| 1YY9A  | <a href="#">CYS267(SG)</a> | 3.76     | <a href="#">PHE230(CB)</a>  | 1YY9A  |                                                                                                                 | S[ ] ... C[ ]      |
| 1YY9A  | <a href="#">CYS267(SG)</a> | 4.36     | <a href="#">PHE230(CG)</a>  | 1YY9A  |                                                                                                                 | S[ ] ... C[ ]      |
| 1YY9A  | <a href="#">CYS267(SG)</a> | 4.54     | <a href="#">PHE230(CD2)</a> | 1YY9A  |                                                                                                                 |                    |
| 1YY9A  | <a href="#">CYS267(N)</a>  | 4.66     | <a href="#">ARG231(N)</a>   | 1YY9A  |                                                                                                                 |                    |
| 1YY9A  | <a href="#">CYS267(N)</a>  | 4.89     | <a href="#">ARG231(CA)</a>  | 1YY9A  |                                                                                                                 |                    |
| 1YY9A  | <a href="#">CYS267(N)</a>  | 3.89     | <a href="#">ARG231(C)</a>   | 1YY9A  |                                                                                                                 | N[ ] ... C[ ]      |
| 1YY9A  | <a href="#">CYS267(N)</a>  | 2.71     | <a href="#">ARG231(O)</a>   | 1YY9A  | <b>H-bond</b> [D-A-AA]:160.7° [A-D-DD]:118.4° d_planarity:-13.2° a_planarity:76.2°                              | N[ ] ... O[ ]      |
| 1YY9A  | <a href="#">CYS267(CA)</a> | 4.69     | <a href="#">ARG231(C)</a>   | 1YY9A  |                                                                                                                 |                    |
| 1YY9A  | <a href="#">CYS267(CA)</a> | 3.64     | <a href="#">ARG231(O)</a>   | 1YY9A  |                                                                                                                 | C[ ] ... O[ ]      |
| 1YY9A  | <a href="#">CYS267(C)</a>  | 4.18     | <a href="#">ARG231(O)</a>   | 1YY9A  |                                                                                                                 | C[ ] ... O[ ]      |
| 1YY9A  | <a href="#">CYS267(O)</a>  | 4.69     | <a href="#">ARG231(C)</a>   | 1YY9A  |                                                                                                                 |                    |
| 1YY9A  | <a href="#">CYS267(O)</a>  | 3.77     | <a href="#">ARG231(O)</a>   | 1YY9A  |                                                                                                                 | O[ ] ... O[ ]      |
| 1YY9A  | <a href="#">CYS267(CB)</a> | 4.34     | <a href="#">ARG231(C)</a>   | 1YY9A  |                                                                                                                 | C[ ] ... C[ ]      |
| 1YY9A  | <a href="#">CYS267(CB)</a> | 3.60     | <a href="#">ARG231(O)</a>   | 1YY9A  |                                                                                                                 | C[ ] ... O[ ]      |
| 1YY9A  | <a href="#">CYS267(SG)</a> | 4.80     | <a href="#">ARG231(N)</a>   | 1YY9A  | [D-A-AA]:106.0° [A-D-DD]:95.5° d_planarity:-85.3°, maximum distance exceeded, bad d_planarity                   |                    |
| 1YY9A  | <a href="#">CYS267(SG)</a> | 4.30     | <a href="#">ARG231(C)</a>   | 1YY9A  |                                                                                                                 | S[ ] ... C[ ]      |
| 1YY9A  | <a href="#">CYS267(SG)</a> | 3.78     | <a href="#">ARG231(O)</a>   | 1YY9A  | Weakly positive                                                                                                 | S[ ] ... O[ ]      |
| 1YY9A  | <a href="#">CYS267(N)</a>  | 4.69     | <a href="#">ASP232(N)</a>   | 1YY9A  |                                                                                                                 |                    |
| 1YY9A  | <a href="#">CYS267(N)</a>  | 4.59     | <a href="#">ASP232(CA)</a>  | 1YY9A  |                                                                                                                 |                    |
| 1YY9A  | <a href="#">CYS267(CA)</a> | 4.71     | <a href="#">ASP232(CA)</a>  | 1YY9A  |                                                                                                                 |                    |
| 1YY9A  | <a href="#">CYS267(CA)</a> | 4.81     | <a href="#">ASP232(CB)</a>  | 1YY9A  |                                                                                                                 |                    |
| 1YY9A  | <a href="#">CYS267(CA)</a> | 4.93     | <a href="#">ASP232(CG)</a>  | 1YY9A  |                                                                                                                 |                    |
| 1YY9A  | <a href="#">CYS267(CA)</a> | 4.58     | <a href="#">ASP232(OD1)</a> | 1YY9A  |                                                                                                                 |                    |
| 1YY9A  | <a href="#">CYS267(C)</a>  | 4.74     | <a href="#">ASP232(CA)</a>  | 1YY9A  |                                                                                                                 |                    |
| 1YY9A  | <a href="#">CYS267(C)</a>  | 4.99     | <a href="#">ASP232(CB)</a>  | 1YY9A  |                                                                                                                 |                    |
| 1YY9A  | <a href="#">CYS267(C)</a>  | 4.79     | <a href="#">ASP232(CG)</a>  | 1YY9A  |                                                                                                                 |                    |
| 1YY9A  | <a href="#">CYS267(C)</a>  | 4.09     | <a href="#">ASP232(OD1)</a> | 1YY9A  |                                                                                                                 | C[ ] ... O[-]      |
| 1YY9A  | <a href="#">CYS267(O)</a>  | 4.82     | <a href="#">ASP232(N)</a>   | 1YY9A  | [D-A-AA]:117.3° [A-D-DD]:46.3° d_planarity:6.2° a_planarity:-12.0°, maximum distance exceeded, bad d_angle(sp2) |                    |
| 1YY9A  | <a href="#">CYS267(O)</a>  | 3.96     | <a href="#">ASP232(CA)</a>  | 1YY9A  |                                                                                                                 | O[ ] ... C[ ]      |
| 1YY9A  | <a href="#">CYS267(O)</a>  | 4.68     | <a href="#">ASP232(C)</a>   | 1YY9A  |                                                                                                                 |                    |
| 1YY9A  | <a href="#">CYS267(O)</a>  | 4.47     | <a href="#">ASP232(CB)</a>  | 1YY9A  |                                                                                                                 | O[ ] ... C[ ]      |
| 1YY9A  | <a href="#">CYS267(O)</a>  | 4.29     | <a href="#">ASP232(CG)</a>  | 1YY9A  |                                                                                                                 | O[ ] ... C[ ]      |
| 1YY9A  | <a href="#">CYS267(O)</a>  | 3.43     | <a href="#">ASP232(OD1)</a> | 1YY9A  |                                                                                                                 | O[ ] ... O[-]      |
| 1YY9A  | <a href="#">CYS267(CB)</a> | 4.54     | <a href="#">ASP232(N)</a>   | 1YY9A  |                                                                                                                 |                    |
| 1YY9A  | <a href="#">CYS267(CB)</a> | 3.99     | <a href="#">ASP232(CA)</a>  | 1YY9A  |                                                                                                                 | C[ ] ... C[ ]      |
| 1YY9A  | <a href="#">CYS267(CB)</a> | 3.67     | <a href="#">ASP232(CB)</a>  | 1YY9A  |                                                                                                                 | C[ ] ... C[ ]      |
| 1YY9A  | <a href="#">CYS267(CB)</a> | 3.78     | <a href="#">ASP232(CG)</a>  | 1YY9A  |                                                                                                                 | C[ ] ... C[ ]      |
| 1YY9A  | <a href="#">CYS267(CB)</a> | 3.74     | <a href="#">ASP232(OD1)</a> | 1YY9A  |                                                                                                                 | C[ ] ... O[-]      |

|       |                             |      |                              |       |                                                                                                                     |               |
|-------|-----------------------------|------|------------------------------|-------|---------------------------------------------------------------------------------------------------------------------|---------------|
| 1YY9A | <a href="#">CYS267</a> (CB) | 4.50 | <a href="#">ASP232</a> (OD2) | 1YY9A |                                                                                                                     | C[ ] ... O[ ] |
| 1YY9A | <a href="#">CYS267</a> (SG) | 4.66 | <a href="#">ASP232</a> (N)   | 1YY9A | [D-A-AA]:75.2° [A-D-DD]:77.2° d_planarity:50.3°,<br>maximum distance exceeded, bad d_angle(sp2)                     |               |
| 1YY9A | <a href="#">CYS267</a> (SG) | 4.56 | <a href="#">ASP232</a> (CA)  | 1YY9A |                                                                                                                     |               |
| 1YY9A | <a href="#">CYS267</a> (SG) | 4.06 | <a href="#">ASP232</a> (CB)  | 1YY9A |                                                                                                                     | S[ ] ... C[ ] |
| 1YY9A | <a href="#">CYS267</a> (SG) | 4.60 | <a href="#">ASP232</a> (CG)  | 1YY9A |                                                                                                                     |               |
| 1YY9A | <a href="#">CYS267</a> (SG) | 4.96 | <a href="#">ASP232</a> (OD1) | 1YY9A | Negative                                                                                                            |               |
| 1YY9A | <a href="#">CYS267</a> (O)  | 4.44 | <a href="#">GLU233</a> (N)   | 1YY9A | [D-A-AA]:155.7° [A-D-DD]:138.5° d_planarity:-35.6°<br>a_planarity:-29.7°, maximum distance exceeded                 | O[ ] ... N[ ] |
| 1YY9A | <a href="#">CYS267</a> (SG) | 4.48 | <a href="#">THR239</a> (C)   | 1YY9A |                                                                                                                     | S[ ] ... C[ ] |
| 1YY9A | <a href="#">CYS267</a> (SG) | 4.61 | <a href="#">THR239</a> (O)   | 1YY9A |                                                                                                                     |               |
| 1YY9A | <a href="#">CYS267</a> (N)  | 3.72 | <a href="#">CYS240</a> (SG)  | 1YY9A | [D-A-AA]:144.8° [A-D-DD]:61.6° d_planarity:68.3°,<br>bad d_angle(sp2), bad d_planarity                              | N[ ] ... S[ ] |
| 1YY9A | <a href="#">CYS267</a> (CA) | 4.53 | <a href="#">CYS240</a> (CB)  | 1YY9A |                                                                                                                     |               |
| 1YY9A | <a href="#">CYS267</a> (CA) | 3.29 | <a href="#">CYS240</a> (SG)  | 1YY9A |                                                                                                                     | C[ ] ... S[ ] |
| 1YY9A | <a href="#">CYS267</a> (C)  | 4.69 | <a href="#">CYS240</a> (SG)  | 1YY9A |                                                                                                                     |               |
| 1YY9A | <a href="#">CYS267</a> (CB) | 4.35 | <a href="#">CYS240</a> (CA)  | 1YY9A |                                                                                                                     | C[ ] ... C[ ] |
| 1YY9A | <a href="#">CYS267</a> (CB) | 3.92 | <a href="#">CYS240</a> (CB)  | 1YY9A |                                                                                                                     | C[ ] ... C[ ] |
| 1YY9A | <a href="#">CYS267</a> (CB) | 3.02 | <a href="#">CYS240</a> (SG)  | 1YY9A |                                                                                                                     | C[ ] ... S[ ] |
| 1YY9A | <a href="#">CYS267</a> (SG) | 3.77 | <a href="#">CYS240</a> (N)   | 1YY9A | [D-A-AA]:142.3° [A-D-DD]:55.7° d_planarity:-80.4°,<br>bad d_angle(sp2), bad d_planarity                             | S[ ] ... N[ ] |
| 1YY9A | <a href="#">CYS267</a> (SG) | 3.18 | <a href="#">CYS240</a> (CA)  | 1YY9A |                                                                                                                     | S[ ] ... C[ ] |
| 1YY9A | <a href="#">CYS267</a> (SG) | 4.50 | <a href="#">CYS240</a> (C)   | 1YY9A |                                                                                                                     | S[ ] ... C[ ] |
| 1YY9A | <a href="#">CYS267</a> (SG) | 3.05 | <a href="#">CYS240</a> (CB)  | 1YY9A |                                                                                                                     | S[ ] ... C[ ] |
| 1YY9A | <a href="#">CYS267</a> (SG) | 2.04 | <a href="#">CYS240</a> (SG)  | 1YY9A |                                                                                                                     | S[ ] ... S[ ] |
| 1YY9A | <a href="#">CYS267</a> (CB) | 4.38 | <a href="#">PRO241</a> (CD)  | 1YY9A |                                                                                                                     | C[ ] ... C[ ] |
| 1YY9A | <a href="#">CYS267</a> (SG) | 4.74 | <a href="#">PRO241</a> (N)   | 1YY9A |                                                                                                                     |               |
| 1YY9A | <a href="#">CYS267</a> (SG) | 4.09 | <a href="#">PRO241</a> (CD)  | 1YY9A |                                                                                                                     | S[ ] ... C[ ] |
| 1YY9A | <a href="#">CYS267</a> (CA) | 4.77 | <a href="#">LYS260</a> (CB)  | 1YY9A |                                                                                                                     |               |
| 1YY9A | <a href="#">CYS267</a> (C)  | 4.55 | <a href="#">LYS260</a> (CB)  | 1YY9A |                                                                                                                     |               |
| 1YY9A | <a href="#">CYS267</a> (C)  | 4.74 | <a href="#">LYS260</a> (CG)  | 1YY9A |                                                                                                                     |               |
| 1YY9A | <a href="#">CYS267</a> (C)  | 4.69 | <a href="#">LYS260</a> (CD)  | 1YY9A |                                                                                                                     |               |
| 1YY9A | <a href="#">CYS267</a> (O)  | 4.78 | <a href="#">LYS260</a> (CD)  | 1YY9A |                                                                                                                     |               |
| 1YY9A | <a href="#">CYS267</a> (CB) | 4.32 | <a href="#">LYS260</a> (CB)  | 1YY9A |                                                                                                                     | C[ ] ... C[ ] |
| 1YY9A | <a href="#">CYS267</a> (CB) | 4.88 | <a href="#">LYS260</a> (CG)  | 1YY9A |                                                                                                                     |               |
| 1YY9A | <a href="#">CYS267</a> (CB) | 4.49 | <a href="#">LYS260</a> (CD)  | 1YY9A |                                                                                                                     | C[ ] ... C[ ] |
| 1YY9A | <a href="#">CYS267</a> (N)  | 4.52 | <a href="#">TYR261</a> (O)   | 1YY9A | [D-A-AA]:150.0° [A-D-DD]:37.7° d_planarity:4.9°<br>a_planarity:6.4°, maximum distance exceeded,<br>bad d_angle(sp2) |               |
| 1YY9A | <a href="#">CYS267</a> (CA) | 4.65 | <a href="#">TYR261</a> (C)   | 1YY9A |                                                                                                                     |               |
| 1YY9A | <a href="#">CYS267</a> (CA) | 3.48 | <a href="#">TYR261</a> (O)   | 1YY9A |                                                                                                                     | C[ ] ... O[ ] |
| 1YY9A | <a href="#">CYS267</a> (C)  | 4.98 | <a href="#">TYR261</a> (C)   | 1YY9A |                                                                                                                     |               |
| 1YY9A | <a href="#">CYS267</a> (C)  | 3.76 | <a href="#">TYR261</a> (O)   | 1YY9A |                                                                                                                     | C[ ] ... O[ ] |
| 1YY9A | <a href="#">CYS267</a> (O)  | 4.98 | <a href="#">TYR261</a> (O)   | 1YY9A |                                                                                                                     |               |
| 1YY9A | <a href="#">CYS267</a> (CB) | 4.24 | <a href="#">TYR261</a> (O)   | 1YY9A |                                                                                                                     | C[ ] ... O[ ] |
| 1YY9A | <a href="#">CYS267</a> (CA) | 4.79 | <a href="#">SER262</a> (CA)  | 1YY9A |                                                                                                                     |               |
| 1YY9A | <a href="#">CYS267</a> (N)  | 4.98 | <a href="#">PHE263</a> (N)   | 1YY9A |                                                                                                                     |               |
| 1YY9A | <a href="#">CYS267</a> (N)  | 4.91 | <a href="#">PHE263</a> (O)   | 1YY9A | [D-A-AA]:125.2° [A-D-DD]:120.2° d_planarity:19.6°<br>a_planarity:-51.4°, maximum distance exceeded                  |               |
| 1YY9A | <a href="#">CYS267</a> (N)  | 4.51 | <a href="#">ALA265</a> (C)   | 1YY9A |                                                                                                                     |               |
| 1YY9A | <a href="#">CYS267</a> (N)  | 4.62 | <a href="#">ALA265</a> (O)   | 1YY9A | [D-A-AA]:77.2° [A-D-DD]:159.7° d_planarity:79.6°                                                                    |               |

|       |                            |      |                             |       |                                                                                                                       |               |
|-------|----------------------------|------|-----------------------------|-------|-----------------------------------------------------------------------------------------------------------------------|---------------|
|       |                            |      |                             |       | a_planarity:14.4°, maximum distance exceeded, bad a_angle(sp2), bad d_planarity                                       |               |
| 1YY9A | <a href="#">CYS267(N)</a>  | 3.56 | <a href="#">THR266(N)</a>   | 1YY9A |                                                                                                                       | N[ ] ... N[ ] |
| 1YY9A | <a href="#">CYS267(N)</a>  | 2.40 | <a href="#">THR266(CA)</a>  | 1YY9A |                                                                                                                       | N[ ] ... C[ ] |
| 1YY9A | <a href="#">CYS267(N)</a>  | 2.27 | <a href="#">THR266(O)</a>   | 1YY9A | [D-A-AA]:29.1° [A-D-DD]:97.2° d_planarity:3.4°<br>a_planarity:1.2°, bad a_angle(sp2)                                  | N[ ] ... O[ ] |
| 1YY9A | <a href="#">CYS267(N)</a>  | 3.28 | <a href="#">THR266(CB)</a>  | 1YY9A |                                                                                                                       | N[ ] ... C[ ] |
| 1YY9A | <a href="#">CYS267(N)</a>  | 4.07 | <a href="#">THR266(OG1)</a> | 1YY9A | [D-A-AA]:47.5° [A-D-DD]:151.6° d_planarity:-88.8°,<br>maximum distance exceeded, bad a_angle(sp3),<br>bad d_planarity | N[ ] ... O[ ] |
| 1YY9A | <a href="#">CYS267(N)</a>  | 3.15 | <a href="#">THR266(CG2)</a> | 1YY9A |                                                                                                                       | N[ ] ... C[ ] |
| 1YY9A | <a href="#">CYS267(CA)</a> | 4.85 | <a href="#">THR266(N)</a>   | 1YY9A |                                                                                                                       |               |
| 1YY9A | <a href="#">CYS267(CA)</a> | 3.79 | <a href="#">THR266(CA)</a>  | 1YY9A |                                                                                                                       | C[ ] ... C[ ] |
| 1YY9A | <a href="#">CYS267(CA)</a> | 2.46 | <a href="#">THR266(C)</a>   | 1YY9A |                                                                                                                       | C[ ] ... C[ ] |
| 1YY9A | <a href="#">CYS267(CA)</a> | 2.85 | <a href="#">THR266(O)</a>   | 1YY9A |                                                                                                                       | C[ ] ... O[ ] |
| 1YY9A | <a href="#">CYS267(CA)</a> | 4.54 | <a href="#">THR266(CB)</a>  | 1YY9A |                                                                                                                       |               |
| 1YY9A | <a href="#">CYS267(CA)</a> | 4.05 | <a href="#">THR266(CG2)</a> | 1YY9A |                                                                                                                       | C[ ] ... C[ ] |
| 1YY9A | <a href="#">CYS267(C)</a>  | 4.52 | <a href="#">THR266(CA)</a>  | 1YY9A |                                                                                                                       |               |
| 1YY9A | <a href="#">CYS267(C)</a>  | 3.36 | <a href="#">THR266(C)</a>   | 1YY9A |                                                                                                                       | C[ ] ... C[ ] |
| 1YY9A | <a href="#">CYS267(C)</a>  | 3.78 | <a href="#">THR266(O)</a>   | 1YY9A |                                                                                                                       | C[ ] ... O[ ] |
| 1YY9A | <a href="#">CYS267(C)</a>  | 4.81 | <a href="#">THR266(CB)</a>  | 1YY9A |                                                                                                                       |               |
| 1YY9A | <a href="#">CYS267(C)</a>  | 3.89 | <a href="#">THR266(CG2)</a> | 1YY9A |                                                                                                                       | C[ ] ... C[ ] |
| 1YY9A | <a href="#">CYS267(O)</a>  | 4.74 | <a href="#">THR266(CA)</a>  | 1YY9A |                                                                                                                       |               |
| 1YY9A | <a href="#">CYS267(O)</a>  | 3.89 | <a href="#">THR266(C)</a>   | 1YY9A |                                                                                                                       | O[ ] ... C[ ] |
| 1YY9A | <a href="#">CYS267(O)</a>  | 4.59 | <a href="#">THR266(O)</a>   | 1YY9A |                                                                                                                       |               |
| 1YY9A | <a href="#">CYS267(O)</a>  | 4.86 | <a href="#">THR266(CB)</a>  | 1YY9A |                                                                                                                       |               |
| 1YY9A | <a href="#">CYS267(O)</a>  | 3.93 | <a href="#">THR266(CG2)</a> | 1YY9A |                                                                                                                       | O[ ] ... C[ ] |
| 1YY9A | <a href="#">CYS267(CB)</a> | 4.79 | <a href="#">THR266(CA)</a>  | 1YY9A |                                                                                                                       |               |
| 1YY9A | <a href="#">CYS267(CB)</a> | 3.61 | <a href="#">THR266(C)</a>   | 1YY9A |                                                                                                                       | C[ ] ... C[ ] |
| 1YY9A | <a href="#">CYS267(CB)</a> | 4.07 | <a href="#">THR266(O)</a>   | 1YY9A |                                                                                                                       | C[ ] ... O[ ] |
| 1YY9A | <a href="#">CYS267(SG)</a> | 4.90 | <a href="#">THR266(CA)</a>  | 1YY9A |                                                                                                                       |               |
| 1YY9A | <a href="#">CYS267(SG)</a> | 3.90 | <a href="#">THR266(C)</a>   | 1YY9A |                                                                                                                       | S[ ] ... C[ ] |
| 1YY9A | <a href="#">CYS267(SG)</a> | 4.28 | <a href="#">THR266(O)</a>   | 1YY9A |                                                                                                                       | S[ ] ... O[ ] |
| 1YY9A | <a href="#">CYS267(N)</a>  | 3.44 | <a href="#">VAL268(N)</a>   | 1YY9A |                                                                                                                       | N[ ] ... N[ ] |
| 1YY9A | <a href="#">CYS267(N)</a>  | 4.58 | <a href="#">VAL268(CA)</a>  | 1YY9A |                                                                                                                       |               |
| 1YY9A | <a href="#">CYS267(N)</a>  | 4.83 | <a href="#">VAL268(CB)</a>  | 1YY9A |                                                                                                                       |               |
| 1YY9A | <a href="#">CYS267(CA)</a> | 2.38 | <a href="#">VAL268(N)</a>   | 1YY9A |                                                                                                                       | C[ ] ... N[ ] |
| 1YY9A | <a href="#">CYS267(CA)</a> | 3.73 | <a href="#">VAL268(CA)</a>  | 1YY9A |                                                                                                                       | C[ ] ... C[ ] |
| 1YY9A | <a href="#">CYS267(CA)</a> | 4.76 | <a href="#">VAL268(C)</a>   | 1YY9A |                                                                                                                       |               |
| 1YY9A | <a href="#">CYS267(CA)</a> | 4.87 | <a href="#">VAL268(O)</a>   | 1YY9A |                                                                                                                       |               |
| 1YY9A | <a href="#">CYS267(CA)</a> | 4.32 | <a href="#">VAL268(CB)</a>  | 1YY9A |                                                                                                                       | C[ ] ... C[ ] |
| 1YY9A | <a href="#">CYS267(C)</a>  | 2.44 | <a href="#">VAL268(CA)</a>  | 1YY9A |                                                                                                                       | C[ ] ... C[ ] |
| 1YY9A | <a href="#">CYS267(C)</a>  | 3.61 | <a href="#">VAL268(C)</a>   | 1YY9A |                                                                                                                       | C[ ] ... C[ ] |
| 1YY9A | <a href="#">CYS267(C)</a>  | 4.02 | <a href="#">VAL268(O)</a>   | 1YY9A |                                                                                                                       | C[ ] ... O[ ] |
| 1YY9A | <a href="#">CYS267(C)</a>  | 3.26 | <a href="#">VAL268(CB)</a>  | 1YY9A |                                                                                                                       | C[ ] ... C[ ] |
| 1YY9A | <a href="#">CYS267(C)</a>  | 4.57 | <a href="#">VAL268(CG1)</a> | 1YY9A |                                                                                                                       |               |
| 1YY9A | <a href="#">CYS267(C)</a>  | 3.90 | <a href="#">VAL268(CG2)</a> | 1YY9A |                                                                                                                       | C[ ] ... C[ ] |
| 1YY9A | <a href="#">CYS267(O)</a>  | 2.26 | <a href="#">VAL268(N)</a>   | 1YY9A | [D-A-AA]:28.9° [A-D-DD]:99.0° d_planarity:10.0°<br>a_planarity:4.2°, bad a_angle(sp2)                                 | O[ ] ... N[ ] |
| 1YY9A | <a href="#">CYS267(O)</a>  | 2.86 | <a href="#">VAL268(CA)</a>  | 1YY9A |                                                                                                                       | O[ ] ... C[ ] |



|       |                            |      |                             |       |                                                                                                                                        |               |
|-------|----------------------------|------|-----------------------------|-------|----------------------------------------------------------------------------------------------------------------------------------------|---------------|
| 1YY9A | <a href="#">CYS267(O)</a>  | 4.10 | <a href="#">VAL268(C)</a>   | 1YY9A |                                                                                                                                        | O[ ] ... C[ ] |
| 1YY9A | <a href="#">CYS267(O)</a>  | 4.78 | <a href="#">VAL268(O)</a>   | 1YY9A |                                                                                                                                        |               |
| 1YY9A | <a href="#">CYS267(O)</a>  | 3.73 | <a href="#">VAL268(CB)</a>  | 1YY9A |                                                                                                                                        | O[ ] ... C[ ] |
| 1YY9A | <a href="#">CYS267(O)</a>  | 3.93 | <a href="#">VAL268(CG2)</a> | 1YY9A |                                                                                                                                        | O[ ] ... C[ ] |
| 1YY9A | <a href="#">CYS267(CB)</a> | 3.29 | <a href="#">VAL268(N)</a>   | 1YY9A |                                                                                                                                        | C[ ] ... N[ ] |
| 1YY9A | <a href="#">CYS267(CB)</a> | 4.64 | <a href="#">VAL268(CA)</a>  | 1YY9A |                                                                                                                                        |               |
| 1YY9A | <a href="#">CYS267(SG)</a> | 4.88 | <a href="#">VAL268(N)</a>   | 1YY9A | [D-A-AA]:20.8° [A-D-DD]:166.2° d_planarity:25.2°,<br>maximum distance exceeded, bad a_angle(sp3)                                       |               |
| 1YY9A | <a href="#">CYS267(C)</a>  | 4.58 | <a href="#">LYS269(N)</a>   | 1YY9A |                                                                                                                                        |               |
| 1YY9A | <a href="#">CYS267(O)</a>  | 4.79 | <a href="#">LYS269(N)</a>   | 1YY9A | [D-A-AA]:72.9° [A-D-DD]:151.3° d_planarity:65.0°<br>a_planarity:12.9°, maximum distance exceeded,<br>bad a_angle(sp2), bad d_planarity |               |

| chain1 | res1/atm1                  | distance | res2/atm2                   | chain2 | H-bonding                                                                            | Charge interaction |
|--------|----------------------------|----------|-----------------------------|--------|--------------------------------------------------------------------------------------|--------------------|
| 1YY9A  | <a href="#">CYS287(N)</a>  | 4.79     | <a href="#">VAL276(CB)</a>  | 1YY9A  |                                                                                      |                    |
| 1YY9A  | <a href="#">CYS287(N)</a>  | 4.86     | <a href="#">VAL276(CG1)</a> | 1YY9A  |                                                                                      |                    |
| 1YY9A  | <a href="#">CYS287(N)</a>  | 4.72     | <a href="#">VAL276(CG2)</a> | 1YY9A  |                                                                                      |                    |
| 1YY9A  | <a href="#">CYS287(CB)</a> | 4.94     | <a href="#">VAL276(CG1)</a> | 1YY9A  |                                                                                      |                    |
| 1YY9A  | <a href="#">CYS287(SG)</a> | 4.39     | <a href="#">VAL276(CB)</a>  | 1YY9A  |                                                                                      | S[ ] ... C[ ]      |
| 1YY9A  | <a href="#">CYS287(SG)</a> | 3.46     | <a href="#">VAL276(CG1)</a> | 1YY9A  |                                                                                      | S[ ] ... C[ ]      |
| 1YY9A  | <a href="#">CYS287(SG)</a> | 4.56     | <a href="#">VAL276(CG2)</a> | 1YY9A  |                                                                                      |                    |
| 1YY9A  | <a href="#">CYS287(N)</a>  | 4.83     | <a href="#">ARG285(C)</a>   | 1YY9A  |                                                                                      |                    |
| 1YY9A  | <a href="#">CYS287(N)</a>  | 3.67     | <a href="#">ALA286(N)</a>   | 1YY9A  |                                                                                      | N[ ] ... N[ ]      |
| 1YY9A  | <a href="#">CYS287(N)</a>  | 2.44     | <a href="#">ALA286(CA)</a>  | 1YY9A  |                                                                                      | N[ ] ... C[ ]      |
| 1YY9A  | <a href="#">CYS287(N)</a>  | 2.27     | <a href="#">ALA286(O)</a>   | 1YY9A  | [D-A-AA]:29.4° [A-D-DD]:97.3° d_planarity:5.0°<br>a_planarity:0.9°, bad a_angle(sp2) | N[ ] ... O[ ]      |
| 1YY9A  | <a href="#">CYS287(N)</a>  | 3.19     | <a href="#">ALA286(CB)</a>  | 1YY9A  |                                                                                      | N[ ] ... C[ ]      |
| 1YY9A  | <a href="#">CYS287(CA)</a> | 4.93     | <a href="#">ALA286(N)</a>   | 1YY9A  |                                                                                      |                    |
| 1YY9A  | <a href="#">CYS287(CA)</a> | 3.85     | <a href="#">ALA286(CA)</a>  | 1YY9A  |                                                                                      | C[ ] ... C[ ]      |
| 1YY9A  | <a href="#">CYS287(CA)</a> | 2.49     | <a href="#">ALA286(C)</a>   | 1YY9A  |                                                                                      | C[ ] ... C[ ]      |
| 1YY9A  | <a href="#">CYS287(CA)</a> | 2.87     | <a href="#">ALA286(O)</a>   | 1YY9A  |                                                                                      | C[ ] ... O[ ]      |
| 1YY9A  | <a href="#">CYS287(CA)</a> | 4.60     | <a href="#">ALA286(CB)</a>  | 1YY9A  |                                                                                      |                    |
| 1YY9A  | <a href="#">CYS287(C)</a>  | 4.71     | <a href="#">ALA286(CA)</a>  | 1YY9A  |                                                                                      |                    |
| 1YY9A  | <a href="#">CYS287(C)</a>  | 3.25     | <a href="#">ALA286(C)</a>   | 1YY9A  |                                                                                      | C[ ] ... C[ ]      |
| 1YY9A  | <a href="#">CYS287(C)</a>  | 3.20     | <a href="#">ALA286(O)</a>   | 1YY9A  |                                                                                      | C[ ] ... O[ ]      |
| 1YY9A  | <a href="#">CYS287(O)</a>  | 4.94     | <a href="#">ALA286(CA)</a>  | 1YY9A  |                                                                                      |                    |
| 1YY9A  | <a href="#">CYS287(O)</a>  | 3.65     | <a href="#">ALA286(C)</a>   | 1YY9A  |                                                                                      | O[ ] ... C[ ]      |
| 1YY9A  | <a href="#">CYS287(O)</a>  | 3.69     | <a href="#">ALA286(O)</a>   | 1YY9A  |                                                                                      | O[ ] ... O[ ]      |
| 1YY9A  | <a href="#">CYS287(CB)</a> | 4.87     | <a href="#">ALA286(CA)</a>  | 1YY9A  |                                                                                      |                    |
| 1YY9A  | <a href="#">CYS287(CB)</a> | 3.75     | <a href="#">ALA286(C)</a>   | 1YY9A  |                                                                                      | C[ ] ... C[ ]      |
| 1YY9A  | <a href="#">CYS287(CB)</a> | 4.34     | <a href="#">ALA286(O)</a>   | 1YY9A  |                                                                                      | C[ ] ... O[ ]      |
| 1YY9A  | <a href="#">CYS287(SG)</a> | 4.44     | <a href="#">ALA286(C)</a>   | 1YY9A  |                                                                                      | S[ ] ... C[ ]      |
| 1YY9A  | <a href="#">CYS287(N)</a>  | 3.64     | <a href="#">GLY288(N)</a>   | 1YY9A  |                                                                                      | N[ ] ... N[ ]      |
| 1YY9A  | <a href="#">CYS287(N)</a>  | 4.96     | <a href="#">GLY288(CA)</a>  | 1YY9A  |                                                                                      |                    |
| 1YY9A  | <a href="#">CYS287(CA)</a> | 2.41     | <a href="#">GLY288(N)</a>   | 1YY9A  |                                                                                      | C[ ] ... N[ ]      |
| 1YY9A  | <a href="#">CYS287(CA)</a> | 3.79     | <a href="#">GLY288(CA)</a>  | 1YY9A  |                                                                                      | C[ ] ... C[ ]      |
| 1YY9A  | <a href="#">CYS287(CA)</a> | 4.36     | <a href="#">GLY288(C)</a>   | 1YY9A  |                                                                                      | C[ ] ... C[ ]      |

|       |                             |      |                             |       |                                                                                                                       |               |
|-------|-----------------------------|------|-----------------------------|-------|-----------------------------------------------------------------------------------------------------------------------|---------------|
| 1YY9A | <a href="#">CYS287</a> (CA) | 4.26 | <a href="#">GLY288</a> (O)  | 1YY9A |                                                                                                                       | C[ ] ... O[ ] |
| 1YY9A | <a href="#">CYS287</a> (C)  | 2.44 | <a href="#">GLY288</a> (CA) | 1YY9A |                                                                                                                       | C[ ] ... C[ ] |
| 1YY9A | <a href="#">CYS287</a> (C)  | 3.02 | <a href="#">GLY288</a> (C)  | 1YY9A |                                                                                                                       | C[ ] ... C[ ] |
| 1YY9A | <a href="#">CYS287</a> (C)  | 3.23 | <a href="#">GLY288</a> (O)  | 1YY9A |                                                                                                                       | C[ ] ... O[ ] |
| 1YY9A | <a href="#">CYS287</a> (O)  | 2.25 | <a href="#">GLY288</a> (N)  | 1YY9A | [D-A-AA]:29.5° [A-D-DD]:95.0° d_planarity:3.1°<br>a_planarity:4.4°, bad a_angle(sp2)                                  | O[ ] ... N[ ] |
| 1YY9A | <a href="#">CYS287</a> (O)  | 2.79 | <a href="#">GLY288</a> (CA) | 1YY9A |                                                                                                                       | O[ ] ... C[ ] |
| 1YY9A | <a href="#">CYS287</a> (O)  | 2.98 | <a href="#">GLY288</a> (C)  | 1YY9A |                                                                                                                       | O[ ] ... C[ ] |
| 1YY9A | <a href="#">CYS287</a> (O)  | 3.31 | <a href="#">GLY288</a> (O)  | 1YY9A |                                                                                                                       | O[ ] ... O[ ] |
| 1YY9A | <a href="#">CYS287</a> (CB) | 3.23 | <a href="#">GLY288</a> (N)  | 1YY9A |                                                                                                                       | C[ ] ... N[ ] |
| 1YY9A | <a href="#">CYS287</a> (CB) | 4.43 | <a href="#">GLY288</a> (CA) | 1YY9A |                                                                                                                       | C[ ] ... C[ ] |
| 1YY9A | <a href="#">CYS287</a> (CB) | 4.53 | <a href="#">GLY288</a> (C)  | 1YY9A |                                                                                                                       |               |
| 1YY9A | <a href="#">CYS287</a> (CB) | 4.01 | <a href="#">GLY288</a> (O)  | 1YY9A |                                                                                                                       | C[ ] ... O[ ] |
| 1YY9A | <a href="#">CYS287</a> (SG) | 4.59 | <a href="#">GLY288</a> (N)  | 1YY9A | [D-A-AA]:32.2° [A-D-DD]:147.5° d_planarity:77.0°,<br>maximum distance exceeded, bad a_angle(sp3),<br>bad d_planarity  |               |
| 1YY9A | <a href="#">CYS287</a> (C)  | 3.98 | <a href="#">ALA289</a> (N)  | 1YY9A |                                                                                                                       | C[ ] ... N[ ] |
| 1YY9A | <a href="#">CYS287</a> (O)  | 3.57 | <a href="#">ALA289</a> (N)  | 1YY9A | [D-A-AA]:100.1° [A-D-DD]:130.6° d_planarity:65.8°<br>a_planarity:25.8°, maximum distance exceeded,<br>bad d_planarity | O[ ] ... N[ ] |
| 1YY9A | <a href="#">CYS287</a> (O)  | 4.66 | <a href="#">ALA289</a> (CA) | 1YY9A |                                                                                                                       |               |
| 1YY9A | <a href="#">CYS287</a> (CA) | 4.68 | <a href="#">SER291</a> (OG) | 1YY9A |                                                                                                                       |               |
| 1YY9A | <a href="#">CYS287</a> (C)  | 4.47 | <a href="#">SER291</a> (OG) | 1YY9A |                                                                                                                       | C[ ] ... O[ ] |
| 1YY9A | <a href="#">CYS287</a> (CB) | 4.58 | <a href="#">SER291</a> (C)  | 1YY9A |                                                                                                                       |               |
| 1YY9A | <a href="#">CYS287</a> (CB) | 4.49 | <a href="#">SER291</a> (O)  | 1YY9A |                                                                                                                       | C[ ] ... O[ ] |
| 1YY9A | <a href="#">CYS287</a> (CB) | 3.99 | <a href="#">SER291</a> (OG) | 1YY9A |                                                                                                                       | C[ ] ... O[ ] |
| 1YY9A | <a href="#">CYS287</a> (SG) | 4.49 | <a href="#">SER291</a> (OG) | 1YY9A | [D-A-AA]:62.5° [A-D-DD]:128.8°, maximum distance<br>exceeded                                                          | S[ ] ... O[ ] |
| 1YY9A | <a href="#">CYS287</a> (CB) | 4.48 | <a href="#">TYR292</a> (N)  | 1YY9A |                                                                                                                       | C[ ] ... N[ ] |
| 1YY9A | <a href="#">CYS287</a> (CB) | 4.40 | <a href="#">TYR292</a> (CA) | 1YY9A |                                                                                                                       | C[ ] ... C[ ] |
| 1YY9A | <a href="#">CYS287</a> (CB) | 4.38 | <a href="#">TYR292</a> (C)  | 1YY9A |                                                                                                                       | C[ ] ... C[ ] |
| 1YY9A | <a href="#">CYS287</a> (CB) | 4.76 | <a href="#">TYR292</a> (O)  | 1YY9A |                                                                                                                       |               |
| 1YY9A | <a href="#">CYS287</a> (SG) | 4.59 | <a href="#">TYR292</a> (N)  | 1YY9A | [D-A-AA]:75.1° [A-D-DD]:73.4° d_planarity:-79.4°,<br>maximum distance exceeded, bad d_angle(sp2),<br>bad d_planarity  |               |
| 1YY9A | <a href="#">CYS287</a> (SG) | 4.40 | <a href="#">TYR292</a> (CA) | 1YY9A |                                                                                                                       | S[ ] ... C[ ] |
| 1YY9A | <a href="#">CYS287</a> (SG) | 3.80 | <a href="#">TYR292</a> (C)  | 1YY9A |                                                                                                                       | S[ ] ... C[ ] |
| 1YY9A | <a href="#">CYS287</a> (SG) | 3.83 | <a href="#">TYR292</a> (O)  | 1YY9A |                                                                                                                       | S[ ] ... O[ ] |
| 1YY9A | <a href="#">CYS287</a> (CB) | 4.57 | <a href="#">GLU293</a> (N)  | 1YY9A |                                                                                                                       |               |
| 1YY9A | <a href="#">CYS287</a> (SG) | 3.95 | <a href="#">GLU293</a> (N)  | 1YY9A | [D-A-AA]:98.7° [A-D-DD]:86.7° d_planarity:68.6°,<br>bad d_angle(sp2), bad d_planarity                                 | S[ ] ... N[ ] |
| 1YY9A | <a href="#">CYS287</a> (SG) | 4.13 | <a href="#">GLU293</a> (CA) | 1YY9A |                                                                                                                       | S[ ] ... C[ ] |
| 1YY9A | <a href="#">CYS287</a> (SG) | 4.27 | <a href="#">GLU293</a> (CB) | 1YY9A | Negative                                                                                                              | S[ ] ... C[ ] |
| 1YY9A | <a href="#">CYS287</a> (SG) | 4.84 | <a href="#">GLU293</a> (CG) | 1YY9A |                                                                                                                       |               |
| 1YY9A | <a href="#">CYS287</a> (SG) | 4.47 | <a href="#">LYS301</a> (C)  | 1YY9A |                                                                                                                       | S[ ] ... C[ ] |
| 1YY9A | <a href="#">CYS287</a> (SG) | 4.36 | <a href="#">LYS301</a> (O)  | 1YY9A |                                                                                                                       | S[ ] ... O[ ] |
| 1YY9A | <a href="#">CYS287</a> (N)  | 4.12 | <a href="#">CYS302</a> (SG) | 1YY9A | [D-A-AA]:152.3° [A-D-DD]:48.3° d_planarity:-80.5°,<br>maximum distance exceeded, bad d_angle(sp2),<br>bad d_planarity | N[ ] ... S[ ] |
| 1YY9A | <a href="#">CYS287</a> (CA) | 4.81 | <a href="#">CYS302</a> (CB) | 1YY9A |                                                                                                                       |               |
| 1YY9A | <a href="#">CYS287</a> (CA) | 3.32 | <a href="#">CYS302</a> (SG) | 1YY9A |                                                                                                                       | C[ ] ... S[ ] |
| 1YY9A | <a href="#">CYS287</a> (C)  | 4.42 | <a href="#">CYS302</a> (SG) | 1YY9A |                                                                                                                       | C[ ] ... S[ ] |

|       |                             |      |                             |       |                                                                                        |                 |
|-------|-----------------------------|------|-----------------------------|-------|----------------------------------------------------------------------------------------|-----------------|
| 1YY9A | <a href="#">CYS287</a> (CB) | 4.86 | <a href="#">CYS302</a> (CA) | 1YY9A |                                                                                        |                 |
| 1YY9A | <a href="#">CYS287</a> (CB) | 4.16 | <a href="#">CYS302</a> (CB) | 1YY9A |                                                                                        | C [ ] ... C [ ] |
| 1YY9A | <a href="#">CYS287</a> (CB) | 3.04 | <a href="#">CYS302</a> (SG) | 1YY9A |                                                                                        | C [ ] ... S [ ] |
| 1YY9A | <a href="#">CYS287</a> (SG) | 4.00 | <a href="#">CYS302</a> (N)  | 1YY9A | [D-A-AA]:151.4° [A-D-DD]:58.5° d_planarity:85.4°,<br>bad_d_angle(sp2), bad_d_planarity | S [ ] ... N [ ] |
| 1YY9A | <a href="#">CYS287</a> (SG) | 3.47 | <a href="#">CYS302</a> (CA) | 1YY9A |                                                                                        | S [ ] ... C [ ] |
| 1YY9A | <a href="#">CYS287</a> (SG) | 4.82 | <a href="#">CYS302</a> (C)  | 1YY9A |                                                                                        |                 |
| 1YY9A | <a href="#">CYS287</a> (SG) | 3.12 | <a href="#">CYS302</a> (CB) | 1YY9A |                                                                                        | S [ ] ... C [ ] |
| 1YY9A | <a href="#">CYS287</a> (SG) | 2.05 | <a href="#">CYS302</a> (SG) | 1YY9A | Disulphide bridge?                                                                     | S [ ] ... S [ ] |

| chain1 | res1/atm1                   | distance | res2/atm2                   | chain2 | H-bonding                                                                                                              | Charge interaction |
|--------|-----------------------------|----------|-----------------------------|--------|------------------------------------------------------------------------------------------------------------------------|--------------------|
| 1YY9A  | <a href="#">CYS446</a> (N)  | 4.49     | <a href="#">THR422</a> (CA) | 1YY9A  |                                                                                                                        | N [ ] ... C [ ]    |
| 1YY9A  | <a href="#">CYS446</a> (N)  | 3.78     | <a href="#">THR422</a> (C)  | 1YY9A  |                                                                                                                        | N [ ] ... C [ ]    |
| 1YY9A  | <a href="#">CYS446</a> (N)  | 2.68     | <a href="#">THR422</a> (O)  | 1YY9A  | <b>H-bond</b> [D-A-AA]:147.2° [A-D-DD]:113.9° d_planarity:-2.2° a_planarity:-58.8°                                     | N [ ] ... O [ ]    |
| 1YY9A  | <a href="#">CYS446</a> (CA) | 4.75     | <a href="#">THR422</a> (C)  | 1YY9A  |                                                                                                                        |                    |
| 1YY9A  | <a href="#">CYS446</a> (CA) | 3.53     | <a href="#">THR422</a> (O)  | 1YY9A  |                                                                                                                        | C [ ] ... O [ ]    |
| 1YY9A  | <a href="#">CYS446</a> (C)  | 4.94     | <a href="#">THR422</a> (C)  | 1YY9A  |                                                                                                                        |                    |
| 1YY9A  | <a href="#">CYS446</a> (C)  | 3.78     | <a href="#">THR422</a> (O)  | 1YY9A  |                                                                                                                        | C [ ] ... O [ ]    |
| 1YY9A  | <a href="#">CYS446</a> (O)  | 4.40     | <a href="#">THR422</a> (C)  | 1YY9A  |                                                                                                                        | O [ ] ... C [ ]    |
| 1YY9A  | <a href="#">CYS446</a> (O)  | 3.39     | <a href="#">THR422</a> (O)  | 1YY9A  |                                                                                                                        | O [ ] ... O [ ]    |
| 1YY9A  | <a href="#">CYS446</a> (CB) | 4.86     | <a href="#">THR422</a> (C)  | 1YY9A  |                                                                                                                        |                    |
| 1YY9A  | <a href="#">CYS446</a> (CB) | 3.67     | <a href="#">THR422</a> (O)  | 1YY9A  |                                                                                                                        | C [ ] ... O [ ]    |
| 1YY9A  | <a href="#">CYS446</a> (SG) | 4.58     | <a href="#">THR422</a> (O)  | 1YY9A  |                                                                                                                        |                    |
| 1YY9A  | <a href="#">CYS446</a> (N)  | 4.77     | <a href="#">SER423</a> (N)  | 1YY9A  |                                                                                                                        |                    |
| 1YY9A  | <a href="#">CYS446</a> (N)  | 4.91     | <a href="#">SER423</a> (CA) | 1YY9A  |                                                                                                                        |                    |
| 1YY9A  | <a href="#">CYS446</a> (O)  | 4.75     | <a href="#">SER423</a> (N)  | 1YY9A  | [D-A-AA]:122.6° [A-D-DD]:55.1° d_planarity:11.9°<br>a_planarity:-50.8°, maximum distance exceeded,<br>bad_d_angle(sp2) |                    |
| 1YY9A  | <a href="#">CYS446</a> (O)  | 4.10     | <a href="#">SER423</a> (CA) | 1YY9A  |                                                                                                                        | O [ ] ... C [ ]    |
| 1YY9A  | <a href="#">CYS446</a> (O)  | 4.78     | <a href="#">SER423</a> (C)  | 1YY9A  |                                                                                                                        |                    |
| 1YY9A  | <a href="#">CYS446</a> (O)  | 4.88     | <a href="#">SER423</a> (CB) | 1YY9A  |                                                                                                                        |                    |
| 1YY9A  | <a href="#">CYS446</a> (O)  | 4.68     | <a href="#">LEU424</a> (N)  | 1YY9A  | [D-A-AA]:160.4° [A-D-DD]:138.5° d_planarity:-59.4°<br>a_planarity:84.9°, maximum distance exceeded                     |                    |
| 1YY9A  | <a href="#">CYS446</a> (N)  | 3.77     | <a href="#">ASN444</a> (C)  | 1YY9A  |                                                                                                                        | N [ ] ... C [ ]    |
| 1YY9A  | <a href="#">CYS446</a> (N)  | 3.31     | <a href="#">ASN444</a> (O)  | 1YY9A  | [D-A-AA]:102.0° [A-D-DD]:133.9° d_planarity:89.3°<br>a_planarity:16.2°, bad_d_planarity                                | N [ ] ... O [ ]    |
| 1YY9A  | <a href="#">CYS446</a> (CA) | 4.97     | <a href="#">ASN444</a> (C)  | 1YY9A  |                                                                                                                        |                    |
| 1YY9A  | <a href="#">CYS446</a> (CA) | 4.45     | <a href="#">ASN444</a> (O)  | 1YY9A  |                                                                                                                        | C [ ] ... O [ ]    |
| 1YY9A  | <a href="#">CYS446</a> (CB) | 4.53     | <a href="#">ASN444</a> (O)  | 1YY9A  |                                                                                                                        |                    |
| 1YY9A  | <a href="#">CYS446</a> (SG) | 4.78     | <a href="#">ASN444</a> (C)  | 1YY9A  |                                                                                                                        |                    |
| 1YY9A  | <a href="#">CYS446</a> (SG) | 4.03     | <a href="#">ASN444</a> (O)  | 1YY9A  |                                                                                                                        | S [ ] ... O [ ]    |
| 1YY9A  | <a href="#">CYS446</a> (N)  | 3.43     | <a href="#">LEU445</a> (N)  | 1YY9A  |                                                                                                                        | N [ ] ... N [ ]    |
| 1YY9A  | <a href="#">CYS446</a> (N)  | 2.40     | <a href="#">LEU445</a> (CA) | 1YY9A  |                                                                                                                        | N [ ] ... C [ ]    |
| 1YY9A  | <a href="#">CYS446</a> (N)  | 2.26     | <a href="#">LEU445</a> (O)  | 1YY9A  | [D-A-AA]:29.4° [A-D-DD]:93.2° d_planarity:2.6°<br>a_planarity:1.1°, bad_a_angle(sp2)                                   | N [ ] ... O [ ]    |
| 1YY9A  | <a href="#">CYS446</a> (N)  | 3.39     | <a href="#">LEU445</a> (CB) | 1YY9A  |                                                                                                                        | N [ ] ... C [ ]    |
| 1YY9A  | <a href="#">CYS446</a> (N)  | 3.32     | <a href="#">LEU445</a> (CG) | 1YY9A  |                                                                                                                        | N [ ] ... C [ ]    |

|       |                            |      |                             |       |                                                                                       |             |
|-------|----------------------------|------|-----------------------------|-------|---------------------------------------------------------------------------------------|-------------|
| 1YY9A | <a href="#">CYS446(N)</a>  | 3.26 | <a href="#">LEU445(CD1)</a> | 1YY9A |                                                                                       | N[] ... C[] |
| 1YY9A | <a href="#">CYS446(N)</a>  | 4.79 | <a href="#">LEU445(CD2)</a> | 1YY9A |                                                                                       |             |
| 1YY9A | <a href="#">CYS446(CA)</a> | 4.70 | <a href="#">LEU445(N)</a>   | 1YY9A |                                                                                       |             |
| 1YY9A | <a href="#">CYS446(CA)</a> | 3.77 | <a href="#">LEU445(CA)</a>  | 1YY9A |                                                                                       | C[] ... C[] |
| 1YY9A | <a href="#">CYS446(CA)</a> | 2.41 | <a href="#">LEU445(C)</a>   | 1YY9A |                                                                                       | C[] ... C[] |
| 1YY9A | <a href="#">CYS446(CA)</a> | 2.75 | <a href="#">LEU445(O)</a>   | 1YY9A |                                                                                       | C[] ... O[] |
| 1YY9A | <a href="#">CYS446(CA)</a> | 4.63 | <a href="#">LEU445(CB)</a>  | 1YY9A |                                                                                       |             |
| 1YY9A | <a href="#">CYS446(CA)</a> | 4.32 | <a href="#">LEU445(CG)</a>  | 1YY9A |                                                                                       | C[] ... C[] |
| 1YY9A | <a href="#">CYS446(CA)</a> | 4.31 | <a href="#">LEU445(CD1)</a> | 1YY9A |                                                                                       | C[] ... C[] |
| 1YY9A | <a href="#">CYS446(C)</a>  | 4.57 | <a href="#">LEU445(CA)</a>  | 1YY9A |                                                                                       |             |
| 1YY9A | <a href="#">CYS446(C)</a>  | 3.40 | <a href="#">LEU445(C)</a>   | 1YY9A |                                                                                       | C[] ... C[] |
| 1YY9A | <a href="#">CYS446(C)</a>  | 3.80 | <a href="#">LEU445(O)</a>   | 1YY9A |                                                                                       | C[] ... O[] |
| 1YY9A | <a href="#">CYS446(C)</a>  | 4.31 | <a href="#">LEU445(CG)</a>  | 1YY9A |                                                                                       | C[] ... C[] |
| 1YY9A | <a href="#">CYS446(C)</a>  | 4.12 | <a href="#">LEU445(CD1)</a> | 1YY9A |                                                                                       | C[] ... C[] |
| 1YY9A | <a href="#">CYS446(O)</a>  | 4.37 | <a href="#">LEU445(CA)</a>  | 1YY9A |                                                                                       | O[] ... C[] |
| 1YY9A | <a href="#">CYS446(O)</a>  | 3.53 | <a href="#">LEU445(C)</a>   | 1YY9A |                                                                                       | O[] ... C[] |
| 1YY9A | <a href="#">CYS446(O)</a>  | 4.17 | <a href="#">LEU445(O)</a>   | 1YY9A |                                                                                       | O[] ... O[] |
| 1YY9A | <a href="#">CYS446(O)</a>  | 4.63 | <a href="#">LEU445(CB)</a>  | 1YY9A |                                                                                       |             |
| 1YY9A | <a href="#">CYS446(O)</a>  | 3.61 | <a href="#">LEU445(CG)</a>  | 1YY9A |                                                                                       | O[] ... C[] |
| 1YY9A | <a href="#">CYS446(O)</a>  | 3.18 | <a href="#">LEU445(CD1)</a> | 1YY9A |                                                                                       | O[] ... C[] |
| 1YY9A | <a href="#">CYS446(O)</a>  | 4.61 | <a href="#">LEU445(CD2)</a> | 1YY9A |                                                                                       |             |
| 1YY9A | <a href="#">CYS446(CB)</a> | 4.72 | <a href="#">LEU445(CA)</a>  | 1YY9A |                                                                                       |             |
| 1YY9A | <a href="#">CYS446(CB)</a> | 3.49 | <a href="#">LEU445(C)</a>   | 1YY9A |                                                                                       | C[] ... C[] |
| 1YY9A | <a href="#">CYS446(CB)</a> | 3.86 | <a href="#">LEU445(O)</a>   | 1YY9A |                                                                                       | C[] ... O[] |
| 1YY9A | <a href="#">CYS446(SG)</a> | 4.95 | <a href="#">LEU445(CA)</a>  | 1YY9A |                                                                                       |             |
| 1YY9A | <a href="#">CYS446(SG)</a> | 3.84 | <a href="#">LEU445(C)</a>   | 1YY9A |                                                                                       | S[] ... C[] |
| 1YY9A | <a href="#">CYS446(SG)</a> | 3.96 | <a href="#">LEU445(O)</a>   | 1YY9A |                                                                                       | S[] ... O[] |
| 1YY9A | <a href="#">CYS446(N)</a>  | 3.61 | <a href="#">TYR447(N)</a>   | 1YY9A |                                                                                       | N[] ... N[] |
| 1YY9A | <a href="#">CYS446(N)</a>  | 4.88 | <a href="#">TYR447(CA)</a>  | 1YY9A |                                                                                       |             |
| 1YY9A | <a href="#">CYS446(N)</a>  | 4.39 | <a href="#">TYR447(CD1)</a> | 1YY9A |                                                                                       | N[] ... C[] |
| 1YY9A | <a href="#">CYS446(N)</a>  | 4.92 | <a href="#">TYR447(CE1)</a> | 1YY9A |                                                                                       |             |
| 1YY9A | <a href="#">CYS446(CA)</a> | 2.38 | <a href="#">TYR447(N)</a>   | 1YY9A |                                                                                       | C[] ... N[] |
| 1YY9A | <a href="#">CYS446(CA)</a> | 3.78 | <a href="#">TYR447(CA)</a>  | 1YY9A |                                                                                       | C[] ... C[] |
| 1YY9A | <a href="#">CYS446(CA)</a> | 4.68 | <a href="#">TYR447(C)</a>   | 1YY9A |                                                                                       |             |
| 1YY9A | <a href="#">CYS446(CA)</a> | 4.33 | <a href="#">TYR447(CB)</a>  | 1YY9A |                                                                                       | C[] ... C[] |
| 1YY9A | <a href="#">CYS446(CA)</a> | 4.26 | <a href="#">TYR447(CG)</a>  | 1YY9A |                                                                                       | C[] ... C[] |
| 1YY9A | <a href="#">CYS446(CA)</a> | 3.87 | <a href="#">TYR447(CD1)</a> | 1YY9A |                                                                                       | C[] ... C[] |
| 1YY9A | <a href="#">CYS446(CA)</a> | 4.49 | <a href="#">TYR447(CE1)</a> | 1YY9A |                                                                                       | C[] ... C[] |
| 1YY9A | <a href="#">CYS446(C)</a>  | 2.49 | <a href="#">TYR447(CA)</a>  | 1YY9A |                                                                                       | C[] ... C[] |
| 1YY9A | <a href="#">CYS446(C)</a>  | 3.32 | <a href="#">TYR447(C)</a>   | 1YY9A |                                                                                       | C[] ... C[] |
| 1YY9A | <a href="#">CYS446(C)</a>  | 4.53 | <a href="#">TYR447(O)</a>   | 1YY9A |                                                                                       |             |
| 1YY9A | <a href="#">CYS446(C)</a>  | 3.01 | <a href="#">TYR447(CB)</a>  | 1YY9A |                                                                                       | C[] ... C[] |
| 1YY9A | <a href="#">CYS446(C)</a>  | 3.32 | <a href="#">TYR447(CG)</a>  | 1YY9A |                                                                                       | C[] ... C[] |
| 1YY9A | <a href="#">CYS446(C)</a>  | 3.23 | <a href="#">TYR447(CD1)</a> | 1YY9A |                                                                                       | C[] ... C[] |
| 1YY9A | <a href="#">CYS446(C)</a>  | 4.41 | <a href="#">TYR447(CD2)</a> | 1YY9A |                                                                                       | C[] ... C[] |
| 1YY9A | <a href="#">CYS446(C)</a>  | 4.25 | <a href="#">TYR447(CE1)</a> | 1YY9A |                                                                                       | C[] ... C[] |
| 1YY9A | <a href="#">CYS446(O)</a>  | 2.26 | <a href="#">TYR447(N)</a>   | 1YY9A | [D-A-AA]:28.7° [A-D-DD]:100.0° d_planarity:6.4°<br>a_planarity:0.7°, bad a_angle(sp2) | O[] ... N[] |
| 1YY9A | <a href="#">CYS446(O)</a>  | 2.90 | <a href="#">TYR447(CA)</a>  | 1YY9A |                                                                                       | O[] ... C[] |

|       |                            |      |                             |       |                                                                                                                       |             |
|-------|----------------------------|------|-----------------------------|-------|-----------------------------------------------------------------------------------------------------------------------|-------------|
| 1YY9A | <a href="#">CYS446(O)</a>  | 3.43 | <a href="#">TYR447(C)</a>   | 1YY9A |                                                                                                                       | O[] ... C[] |
| 1YY9A | <a href="#">CYS446(O)</a>  | 4.63 | <a href="#">TYR447(O)</a>   | 1YY9A |                                                                                                                       |             |
| 1YY9A | <a href="#">CYS446(O)</a>  | 3.01 | <a href="#">TYR447(CB)</a>  | 1YY9A |                                                                                                                       | O[] ... C[] |
| 1YY9A | <a href="#">CYS446(O)</a>  | 3.52 | <a href="#">TYR447(CG)</a>  | 1YY9A |                                                                                                                       | O[] ... C[] |
| 1YY9A | <a href="#">CYS446(O)</a>  | 3.28 | <a href="#">TYR447(CD1)</a> | 1YY9A |                                                                                                                       | O[] ... C[] |
| 1YY9A | <a href="#">CYS446(O)</a>  | 4.82 | <a href="#">TYR447(CD2)</a> | 1YY9A |                                                                                                                       |             |
| 1YY9A | <a href="#">CYS446(O)</a>  | 4.43 | <a href="#">TYR447(CE1)</a> | 1YY9A |                                                                                                                       | O[] ... C[] |
| 1YY9A | <a href="#">CYS446(CB)</a> | 2.90 | <a href="#">TYR447(N)</a>   | 1YY9A |                                                                                                                       | C[] ... N[] |
| 1YY9A | <a href="#">CYS446(CB)</a> | 4.17 | <a href="#">TYR447(CA)</a>  | 1YY9A |                                                                                                                       | C[] ... C[] |
| 1YY9A | <a href="#">CYS446(CB)</a> | 4.51 | <a href="#">TYR447(CB)</a>  | 1YY9A |                                                                                                                       |             |
| 1YY9A | <a href="#">CYS446(CB)</a> | 3.94 | <a href="#">TYR447(CG)</a>  | 1YY9A |                                                                                                                       | C[] ... C[] |
| 1YY9A | <a href="#">CYS446(CB)</a> | 3.44 | <a href="#">TYR447(CD1)</a> | 1YY9A |                                                                                                                       | C[] ... C[] |
| 1YY9A | <a href="#">CYS446(CB)</a> | 4.53 | <a href="#">TYR447(CD2)</a> | 1YY9A |                                                                                                                       |             |
| 1YY9A | <a href="#">CYS446(CB)</a> | 3.64 | <a href="#">TYR447(CE1)</a> | 1YY9A |                                                                                                                       | C[] ... C[] |
| 1YY9A | <a href="#">CYS446(CB)</a> | 4.69 | <a href="#">TYR447(CE2)</a> | 1YY9A |                                                                                                                       |             |
| 1YY9A | <a href="#">CYS446(CB)</a> | 4.28 | <a href="#">TYR447(CZ)</a>  | 1YY9A |                                                                                                                       | C[] ... C[] |
| 1YY9A | <a href="#">CYS446(SG)</a> | 4.52 | <a href="#">TYR447(N)</a>   | 1YY9A | [D-A-AA]:19.9° [A-D-DD]:151.0° d_planarity:-80.9°,<br>maximum distance exceeded, bad a_angle(sp3),<br>bad d_planarity |             |
| 1YY9A | <a href="#">CYS446(SG)</a> | 4.86 | <a href="#">TYR447(CE1)</a> | 1YY9A |                                                                                                                       |             |
| 1YY9A | <a href="#">CYS446(CA)</a> | 4.44 | <a href="#">ALA448(N)</a>   | 1YY9A |                                                                                                                       | C[] ... N[] |
| 1YY9A | <a href="#">CYS446(C)</a>  | 3.15 | <a href="#">ALA448(N)</a>   | 1YY9A |                                                                                                                       | C[] ... N[] |
| 1YY9A | <a href="#">CYS446(C)</a>  | 4.48 | <a href="#">ALA448(CA)</a>  | 1YY9A |                                                                                                                       | C[] ... C[] |
| 1YY9A | <a href="#">CYS446(C)</a>  | 4.77 | <a href="#">ALA448(CB)</a>  | 1YY9A |                                                                                                                       |             |
| 1YY9A | <a href="#">CYS446(O)</a>  | 3.06 | <a href="#">ALA448(N)</a>   | 1YY9A | [D-A-AA]:83.1° [A-D-DD]:132.5° d_planarity:-46.5°<br>a_planarity:37.6°, bad a_angle(sp2)                              | O[] ... N[] |
| 1YY9A | <a href="#">CYS446(O)</a>  | 4.18 | <a href="#">ALA448(CA)</a>  | 1YY9A |                                                                                                                       | O[] ... C[] |
| 1YY9A | <a href="#">CYS446(O)</a>  | 4.35 | <a href="#">ALA448(CB)</a>  | 1YY9A |                                                                                                                       | O[] ... C[] |
| 1YY9A | <a href="#">CYS446(SG)</a> | 4.38 | <a href="#">ARG470(CB)</a>  | 1YY9A |                                                                                                                       | S[] ... C[] |
| 1YY9A | <a href="#">CYS446(SG)</a> | 4.12 | <a href="#">ARG470(CG)</a>  | 1YY9A |                                                                                                                       | S[] ... C[] |
| 1YY9A | <a href="#">CYS446(SG)</a> | 3.96 | <a href="#">ARG470(CD)</a>  | 1YY9A | Positive                                                                                                              | S[] ... C[] |
| 1YY9A | <a href="#">CYS446(N)</a>  | 4.48 | <a href="#">CYS475(SG)</a>  | 1YY9A | [D-A-AA]:135.6° [A-D-DD]:46.9° d_planarity:61.7°,<br>maximum distance exceeded, bad d_angle(sp2),<br>bad d_planarity  | N[] ... S[] |
| 1YY9A | <a href="#">CYS446(CA)</a> | 4.88 | <a href="#">CYS475(CB)</a>  | 1YY9A |                                                                                                                       |             |
| 1YY9A | <a href="#">CYS446(CA)</a> | 3.64 | <a href="#">CYS475(SG)</a>  | 1YY9A |                                                                                                                       | C[] ... S[] |
| 1YY9A | <a href="#">CYS446(C)</a>  | 4.82 | <a href="#">CYS475(SG)</a>  | 1YY9A |                                                                                                                       |             |
| 1YY9A | <a href="#">CYS446(CB)</a> | 3.94 | <a href="#">CYS475(CB)</a>  | 1YY9A |                                                                                                                       | C[] ... C[] |
| 1YY9A | <a href="#">CYS446(CB)</a> | 3.07 | <a href="#">CYS475(SG)</a>  | 1YY9A |                                                                                                                       | C[] ... S[] |
| 1YY9A | <a href="#">CYS446(SG)</a> | 4.73 | <a href="#">CYS475(N)</a>   | 1YY9A | [D-A-AA]:130.2° [A-D-DD]:50.7° d_planarity:-51.3°,<br>maximum distance exceeded, bad d_angle(sp2)                     |             |
| 1YY9A | <a href="#">CYS446(SG)</a> | 3.97 | <a href="#">CYS475(CA)</a>  | 1YY9A |                                                                                                                       | S[] ... C[] |
| 1YY9A | <a href="#">CYS446(SG)</a> | 3.14 | <a href="#">CYS475(CB)</a>  | 1YY9A |                                                                                                                       | S[] ... C[] |
| 1YY9A | <a href="#">CYS446(SG)</a> | 2.07 | <a href="#">CYS475(SG)</a>  | 1YY9A | Disulphide bridge                                                                                                     | S[] ... S[] |
| 1YY9A | <a href="#">CYS446(CB)</a> | 4.09 | <a href="#">GLN480(O)</a>   | 1YY9A |                                                                                                                       | C[] ... O[] |
| 1YY9A | <a href="#">CYS446(CB)</a> | 4.56 | <a href="#">GLN480(CB)</a>  | 1YY9A |                                                                                                                       |             |
| 1YY9A | <a href="#">CYS446(SG)</a> | 4.34 | <a href="#">GLN480(O)</a>   | 1YY9A |                                                                                                                       | S[] ... O[] |
| 1YY9A | <a href="#">CYS446(SG)</a> | 4.07 | <a href="#">GLN480(CB)</a>  | 1YY9A |                                                                                                                       | S[] ... C[] |
| 1YY9A | <a href="#">CYS446(SG)</a> | 4.86 | <a href="#">GLN480(CG)</a>  | 1YY9A |                                                                                                                       |             |
| 1YY9A | <a href="#">CYS446(SG)</a> | 4.32 | <a href="#">GLN480(CD)</a>  | 1YY9A |                                                                                                                       | S[] ... C[] |
| 1YY9A | <a href="#">CYS446(SG)</a> | 3.77 | <a href="#">GLN480(OE1)</a> | 1YY9A |                                                                                                                       | S[] ... O[] |

|       |                            |      |                             |       |                                                                                                                      |  |
|-------|----------------------------|------|-----------------------------|-------|----------------------------------------------------------------------------------------------------------------------|--|
| 1YY9A | <a href="#">CYS446(SG)</a> | 4.97 | <a href="#">GLN480(NE2)</a> | 1YY9A | [D-A-AA]:109.1° [A-D-DD]:54.1° d_planarity:62.4°,<br>maximum distance exceeded, bad d_angle(sp2),<br>bad d_planarity |  |
|-------|----------------------------|------|-----------------------------|-------|----------------------------------------------------------------------------------------------------------------------|--|

| chain1 | res1/atm1                  | distance | res2/atm2                   | chain2 | H-bonding                                                                                                                              | Charge interaction |
|--------|----------------------------|----------|-----------------------------|--------|----------------------------------------------------------------------------------------------------------------------------------------|--------------------|
| 1Z2BA  | <a href="#">CYS295(N)</a>  | 4.91     | <a href="#">THR271(CG2)</a> | 1Z2BA  |                                                                                                                                        |                    |
| 1Z2BA  | <a href="#">CYS295(CA)</a> | 4.63     | <a href="#">THR271(CB)</a>  | 1Z2BA  |                                                                                                                                        |                    |
| 1Z2BA  | <a href="#">CYS295(CA)</a> | 3.79     | <a href="#">THR271(CG2)</a> | 1Z2BA  |                                                                                                                                        | C [ ] ... C [ ]    |
| 1Z2BA  | <a href="#">CYS295(C)</a>  | 4.77     | <a href="#">THR271(CB)</a>  | 1Z2BA  |                                                                                                                                        |                    |
| 1Z2BA  | <a href="#">CYS295(C)</a>  | 4.99     | <a href="#">THR271(OG1)</a> | 1Z2BA  |                                                                                                                                        |                    |
| 1Z2BA  | <a href="#">CYS295(C)</a>  | 3.89     | <a href="#">THR271(CG2)</a> | 1Z2BA  |                                                                                                                                        | C [ ] ... C [ ]    |
| 1Z2BA  | <a href="#">CYS295(O)</a>  | 4.02     | <a href="#">THR271(CB)</a>  | 1Z2BA  |                                                                                                                                        | O [ ] ... C [ ]    |
| 1Z2BA  | <a href="#">CYS295(O)</a>  | 3.99     | <a href="#">THR271(OG1)</a> | 1Z2BA  | [D-A-AA]:139.1° [A-D-DD]:81.1° a_planarity:-19.8°,<br>maximum distance exceeded                                                        | O [ ] ... O [ ]    |
| 1Z2BA  | <a href="#">CYS295(O)</a>  | 3.20     | <a href="#">THR271(CG2)</a> | 1Z2BA  |                                                                                                                                        | O [ ] ... C [ ]    |
| 1Z2BA  | <a href="#">CYS295(CB)</a> | 4.90     | <a href="#">THR271(CB)</a>  | 1Z2BA  |                                                                                                                                        |                    |
| 1Z2BA  | <a href="#">CYS295(CB)</a> | 4.49     | <a href="#">THR271(CG2)</a> | 1Z2BA  |                                                                                                                                        | C [ ] ... C [ ]    |
| 1Z2BA  | <a href="#">CYS295(SG)</a> | 4.61     | <a href="#">THR271(O)</a>   | 1Z2BA  |                                                                                                                                        |                    |
| 1Z2BA  | <a href="#">CYS295(SG)</a> | 4.56     | <a href="#">THR271(CB)</a>  | 1Z2BA  |                                                                                                                                        |                    |
| 1Z2BA  | <a href="#">CYS295(SG)</a> | 4.48     | <a href="#">THR271(CG2)</a> | 1Z2BA  |                                                                                                                                        | S [ ] ... C [ ]    |
| 1Z2BA  | <a href="#">CYS295(SG)</a> | 4.98     | <a href="#">ALA273(CA)</a>  | 1Z2BA  |                                                                                                                                        |                    |
| 1Z2BA  | <a href="#">CYS295(N)</a>  | 4.57     | <a href="#">ILE291(C)</a>   | 1Z2BA  |                                                                                                                                        |                    |
| 1Z2BA  | <a href="#">CYS295(N)</a>  | 3.49     | <a href="#">ILE291(O)</a>   | 1Z2BA  | <b>H-bond</b> [D-A-AA]:146.0° [A-D-DD]:118.2° d_planarity:-<br>36.7° a_planarity:51.5°                                                 | N [ ] ... O [ ]    |
| 1Z2BA  | <a href="#">CYS295(CA)</a> | 4.37     | <a href="#">ILE291(O)</a>   | 1Z2BA  |                                                                                                                                        | C [ ] ... O [ ]    |
| 1Z2BA  | <a href="#">CYS295(CB)</a> | 4.24     | <a href="#">ILE291(O)</a>   | 1Z2BA  |                                                                                                                                        | C [ ] ... O [ ]    |
| 1Z2BA  | <a href="#">CYS295(SG)</a> | 4.95     | <a href="#">ILE291(C)</a>   | 1Z2BA  |                                                                                                                                        |                    |
| 1Z2BA  | <a href="#">CYS295(SG)</a> | 4.02     | <a href="#">ILE291(O)</a>   | 1Z2BA  |                                                                                                                                        | S [ ] ... O [ ]    |
| 1Z2BA  | <a href="#">CYS295(N)</a>  | 4.59     | <a href="#">THR292(CA)</a>  | 1Z2BA  |                                                                                                                                        |                    |
| 1Z2BA  | <a href="#">CYS295(N)</a>  | 3.60     | <a href="#">THR292(C)</a>   | 1Z2BA  |                                                                                                                                        | N [ ] ... C [ ]    |
| 1Z2BA  | <a href="#">CYS295(N)</a>  | 2.71     | <a href="#">THR292(O)</a>   | 1Z2BA  | <b>H-bond</b> [D-A-AA]:128.3° [A-D-DD]:99.4° d_planarity:-25.3°<br>a_planarity:78.4°                                                   | N [ ] ... O [ ]    |
| 1Z2BA  | <a href="#">CYS295(CA)</a> | 4.37     | <a href="#">THR292(C)</a>   | 1Z2BA  |                                                                                                                                        | C [ ] ... C [ ]    |
| 1Z2BA  | <a href="#">CYS295(CA)</a> | 3.28     | <a href="#">THR292(O)</a>   | 1Z2BA  |                                                                                                                                        | C [ ] ... O [ ]    |
| 1Z2BA  | <a href="#">CYS295(C)</a>  | 3.97     | <a href="#">THR292(O)</a>   | 1Z2BA  |                                                                                                                                        | C [ ] ... O [ ]    |
| 1Z2BA  | <a href="#">CYS295(CB)</a> | 4.37     | <a href="#">THR292(CA)</a>  | 1Z2BA  |                                                                                                                                        | C [ ] ... C [ ]    |
| 1Z2BA  | <a href="#">CYS295(CB)</a> | 3.87     | <a href="#">THR292(C)</a>   | 1Z2BA  |                                                                                                                                        | C [ ] ... C [ ]    |
| 1Z2BA  | <a href="#">CYS295(CB)</a> | 2.79     | <a href="#">THR292(O)</a>   | 1Z2BA  |                                                                                                                                        | C [ ] ... O [ ]    |
| 1Z2BA  | <a href="#">CYS295(SG)</a> | 4.51     | <a href="#">THR292(CA)</a>  | 1Z2BA  |                                                                                                                                        |                    |
| 1Z2BA  | <a href="#">CYS295(SG)</a> | 4.56     | <a href="#">THR292(C)</a>   | 1Z2BA  |                                                                                                                                        |                    |
| 1Z2BA  | <a href="#">CYS295(SG)</a> | 3.81     | <a href="#">THR292(O)</a>   | 1Z2BA  |                                                                                                                                        | S [ ] ... O [ ]    |
| 1Z2BA  | <a href="#">CYS295(N)</a>  | 4.23     | <a href="#">ASN293(N)</a>   | 1Z2BA  |                                                                                                                                        | N [ ] ... N [ ]    |
| 1Z2BA  | <a href="#">CYS295(N)</a>  | 4.19     | <a href="#">ASN293(CA)</a>  | 1Z2BA  |                                                                                                                                        | N [ ] ... C [ ]    |
| 1Z2BA  | <a href="#">CYS295(N)</a>  | 3.25     | <a href="#">ASN293(C)</a>   | 1Z2BA  |                                                                                                                                        | N [ ] ... C [ ]    |
| 1Z2BA  | <a href="#">CYS295(N)</a>  | 3.70     | <a href="#">ASN293(O)</a>   | 1Z2BA  | [D-A-AA]:59.7° [A-D-DD]:135.3° d_planarity:79.3°<br>a_planarity:47.3°, maximum distance exceeded,<br>bad a_angle(sp2), bad d_planarity | N [ ] ... O [ ]    |

|       |                            |      |                             |       |                                                                                      |               |
|-------|----------------------------|------|-----------------------------|-------|--------------------------------------------------------------------------------------|---------------|
| 1Z2BA | <a href="#">CYS295(CA)</a> | 4.52 | <a href="#">ASN293(C)</a>   | 1Z2BA |                                                                                      |               |
| 1Z2BA | <a href="#">CYS295(CA)</a> | 4.84 | <a href="#">ASN293(O)</a>   | 1Z2BA |                                                                                      |               |
| 1Z2BA | <a href="#">CYS295(C)</a>  | 4.86 | <a href="#">ASN293(C)</a>   | 1Z2BA |                                                                                      |               |
| 1Z2BA | <a href="#">CYS295(C)</a>  | 4.84 | <a href="#">ASN293(O)</a>   | 1Z2BA |                                                                                      |               |
| 1Z2BA | <a href="#">CYS295(N)</a>  | 2.60 | <a href="#">ALA294(N)</a>   | 1Z2BA |                                                                                      | N[ ] ... N[ ] |
| 1Z2BA | <a href="#">CYS295(N)</a>  | 2.38 | <a href="#">ALA294(CA)</a>  | 1Z2BA |                                                                                      | N[ ] ... C[ ] |
| 1Z2BA | <a href="#">CYS295(N)</a>  | 2.26 | <a href="#">ALA294(O)</a>   | 1Z2BA | [D-A-AA]:28.8° [A-D-DD]:97.9° d_planarity:3.0°<br>a_planarity:0.0°, bad a_angle(sp2) | N[ ] ... O[ ] |
| 1Z2BA | <a href="#">CYS295(N)</a>  | 3.13 | <a href="#">ALA294(CB)</a>  | 1Z2BA |                                                                                      | N[ ] ... C[ ] |
| 1Z2BA | <a href="#">CYS295(CA)</a> | 4.03 | <a href="#">ALA294(N)</a>   | 1Z2BA |                                                                                      | C[ ] ... N[ ] |
| 1Z2BA | <a href="#">CYS295(CA)</a> | 3.77 | <a href="#">ALA294(CA)</a>  | 1Z2BA |                                                                                      | C[ ] ... C[ ] |
| 1Z2BA | <a href="#">CYS295(CA)</a> | 2.46 | <a href="#">ALA294(C)</a>   | 1Z2BA |                                                                                      | C[ ] ... C[ ] |
| 1Z2BA | <a href="#">CYS295(CA)</a> | 2.85 | <a href="#">ALA294(O)</a>   | 1Z2BA |                                                                                      | C[ ] ... O[ ] |
| 1Z2BA | <a href="#">CYS295(CA)</a> | 4.39 | <a href="#">ALA294(CB)</a>  | 1Z2BA |                                                                                      | C[ ] ... C[ ] |
| 1Z2BA | <a href="#">CYS295(C)</a>  | 4.71 | <a href="#">ALA294(N)</a>   | 1Z2BA |                                                                                      |               |
| 1Z2BA | <a href="#">CYS295(C)</a>  | 4.41 | <a href="#">ALA294(CA)</a>  | 1Z2BA |                                                                                      | C[ ] ... C[ ] |
| 1Z2BA | <a href="#">CYS295(C)</a>  | 3.00 | <a href="#">ALA294(C)</a>   | 1Z2BA |                                                                                      | C[ ] ... C[ ] |
| 1Z2BA | <a href="#">CYS295(C)</a>  | 2.95 | <a href="#">ALA294(O)</a>   | 1Z2BA |                                                                                      | C[ ] ... O[ ] |
| 1Z2BA | <a href="#">CYS295(O)</a>  | 3.94 | <a href="#">ALA294(C)</a>   | 1Z2BA |                                                                                      | O[ ] ... C[ ] |
| 1Z2BA | <a href="#">CYS295(O)</a>  | 3.58 | <a href="#">ALA294(O)</a>   | 1Z2BA |                                                                                      | O[ ] ... O[ ] |
| 1Z2BA | <a href="#">CYS295(CB)</a> | 4.61 | <a href="#">ALA294(N)</a>   | 1Z2BA |                                                                                      |               |
| 1Z2BA | <a href="#">CYS295(CB)</a> | 4.76 | <a href="#">ALA294(CA)</a>  | 1Z2BA |                                                                                      |               |
| 1Z2BA | <a href="#">CYS295(CB)</a> | 3.69 | <a href="#">ALA294(C)</a>   | 1Z2BA |                                                                                      | C[ ] ... C[ ] |
| 1Z2BA | <a href="#">CYS295(CB)</a> | 4.30 | <a href="#">ALA294(O)</a>   | 1Z2BA |                                                                                      | C[ ] ... O[ ] |
| 1Z2BA | <a href="#">CYS295(SG)</a> | 4.68 | <a href="#">ALA294(C)</a>   | 1Z2BA |                                                                                      |               |
| 1Z2BA | <a href="#">CYS295(N)</a>  | 2.66 | <a href="#">PHE296(N)</a>   | 1Z2BA |                                                                                      | N[ ] ... N[ ] |
| 1Z2BA | <a href="#">CYS295(N)</a>  | 4.03 | <a href="#">PHE296(CA)</a>  | 1Z2BA |                                                                                      | N[ ] ... C[ ] |
| 1Z2BA | <a href="#">CYS295(N)</a>  | 4.40 | <a href="#">PHE296(C)</a>   | 1Z2BA |                                                                                      | N[ ] ... C[ ] |
| 1Z2BA | <a href="#">CYS295(N)</a>  | 4.88 | <a href="#">PHE296(CB)</a>  | 1Z2BA |                                                                                      |               |
| 1Z2BA | <a href="#">CYS295(CA)</a> | 2.32 | <a href="#">PHE296(N)</a>   | 1Z2BA |                                                                                      | C[ ] ... N[ ] |
| 1Z2BA | <a href="#">CYS295(CA)</a> | 3.69 | <a href="#">PHE296(CA)</a>  | 1Z2BA |                                                                                      | C[ ] ... C[ ] |
| 1Z2BA | <a href="#">CYS295(CA)</a> | 4.38 | <a href="#">PHE296(C)</a>   | 1Z2BA |                                                                                      | C[ ] ... C[ ] |
| 1Z2BA | <a href="#">CYS295(CA)</a> | 4.65 | <a href="#">PHE296(CB)</a>  | 1Z2BA |                                                                                      |               |
| 1Z2BA | <a href="#">CYS295(CA)</a> | 4.74 | <a href="#">PHE296(CG)</a>  | 1Z2BA |                                                                                      |               |
| 1Z2BA | <a href="#">CYS295(C)</a>  | 2.40 | <a href="#">PHE296(CA)</a>  | 1Z2BA |                                                                                      | C[ ] ... C[ ] |
| 1Z2BA | <a href="#">CYS295(C)</a>  | 3.20 | <a href="#">PHE296(C)</a>   | 1Z2BA |                                                                                      | C[ ] ... C[ ] |
| 1Z2BA | <a href="#">CYS295(C)</a>  | 4.27 | <a href="#">PHE296(O)</a>   | 1Z2BA |                                                                                      | C[ ] ... O[ ] |
| 1Z2BA | <a href="#">CYS295(C)</a>  | 3.57 | <a href="#">PHE296(CB)</a>  | 1Z2BA |                                                                                      | C[ ] ... C[ ] |
| 1Z2BA | <a href="#">CYS295(C)</a>  | 3.83 | <a href="#">PHE296(CG)</a>  | 1Z2BA |                                                                                      | C[ ] ... C[ ] |
| 1Z2BA | <a href="#">CYS295(C)</a>  | 4.51 | <a href="#">PHE296(CD1)</a> | 1Z2BA |                                                                                      |               |
| 1Z2BA | <a href="#">CYS295(C)</a>  | 4.11 | <a href="#">PHE296(CD2)</a> | 1Z2BA |                                                                                      | C[ ] ... C[ ] |
| 1Z2BA | <a href="#">CYS295(C)</a>  | 4.98 | <a href="#">PHE296(CE2)</a> | 1Z2BA |                                                                                      |               |
| 1Z2BA | <a href="#">CYS295(O)</a>  | 2.26 | <a href="#">PHE296(N)</a>   | 1Z2BA | [D-A-AA]:28.4° [A-D-DD]:95.4° d_planarity:1.8°<br>a_planarity:3.1°, bad a_angle(sp2) | O[ ] ... N[ ] |
| 1Z2BA | <a href="#">CYS295(O)</a>  | 2.79 | <a href="#">PHE296(CA)</a>  | 1Z2BA |                                                                                      | O[ ] ... C[ ] |
| 1Z2BA | <a href="#">CYS295(O)</a>  | 3.52 | <a href="#">PHE296(C)</a>   | 1Z2BA |                                                                                      | O[ ] ... C[ ] |
| 1Z2BA | <a href="#">CYS295(O)</a>  | 4.73 | <a href="#">PHE296(O)</a>   | 1Z2BA |                                                                                      |               |
| 1Z2BA | <a href="#">CYS295(O)</a>  | 4.08 | <a href="#">PHE296(CB)</a>  | 1Z2BA |                                                                                      | O[ ] ... C[ ] |
| 1Z2BA | <a href="#">CYS295(O)</a>  | 4.28 | <a href="#">PHE296(CG)</a>  | 1Z2BA |                                                                                      | O[ ] ... C[ ] |

|       |                            |      |                             |       |                                                                                                                      |               |
|-------|----------------------------|------|-----------------------------|-------|----------------------------------------------------------------------------------------------------------------------|---------------|
| 1Z2BA | <a href="#">CYS295(O)</a>  | 4.19 | <a href="#">PHE296(CD2)</a> | 1Z2BA |                                                                                                                      | O[ ] ... C[ ] |
| 1Z2BA | <a href="#">CYS295(CB)</a> | 2.94 | <a href="#">PHE296(N)</a>   | 1Z2BA |                                                                                                                      | C[ ] ... N[ ] |
| 1Z2BA | <a href="#">CYS295(CB)</a> | 4.24 | <a href="#">PHE296(CA)</a>  | 1Z2BA |                                                                                                                      | C[ ] ... C[ ] |
| 1Z2BA | <a href="#">CYS295(CB)</a> | 4.80 | <a href="#">PHE296(CB)</a>  | 1Z2BA |                                                                                                                      |               |
| 1Z2BA | <a href="#">CYS295(CB)</a> | 4.42 | <a href="#">PHE296(CG)</a>  | 1Z2BA |                                                                                                                      | C[ ] ... C[ ] |
| 1Z2BA | <a href="#">CYS295(CB)</a> | 4.42 | <a href="#">PHE296(CD1)</a> | 1Z2BA |                                                                                                                      | C[ ] ... C[ ] |
| 1Z2BA | <a href="#">CYS295(CB)</a> | 4.74 | <a href="#">PHE296(CD2)</a> | 1Z2BA |                                                                                                                      |               |
| 1Z2BA | <a href="#">CYS295(CB)</a> | 4.73 | <a href="#">PHE296(CE1)</a> | 1Z2BA |                                                                                                                      |               |
| 1Z2BA | <a href="#">CYS295(SG)</a> | 4.65 | <a href="#">PHE296(N)</a>   | 1Z2BA | [D-A-AA]:11.4° [A-D-DD]:152.2° d_planarity:55.3°,<br>maximum distance exceeded, bad a_angle(sp3)                     |               |
| 1Z2BA | <a href="#">CYS295(N)</a>  | 4.49 | <a href="#">GLU297(N)</a>   | 1Z2BA |                                                                                                                      | N[ ] ... N[ ] |
| 1Z2BA | <a href="#">CYS295(N)</a>  | 4.70 | <a href="#">GLU297(CB)</a>  | 1Z2BA |                                                                                                                      |               |
| 1Z2BA | <a href="#">CYS295(CA)</a> | 4.35 | <a href="#">GLU297(N)</a>   | 1Z2BA |                                                                                                                      | C[ ] ... N[ ] |
| 1Z2BA | <a href="#">CYS295(C)</a>  | 3.18 | <a href="#">GLU297(N)</a>   | 1Z2BA |                                                                                                                      | C[ ] ... N[ ] |
| 1Z2BA | <a href="#">CYS295(C)</a>  | 4.40 | <a href="#">GLU297(CA)</a>  | 1Z2BA |                                                                                                                      | C[ ] ... C[ ] |
| 1Z2BA | <a href="#">CYS295(C)</a>  | 4.93 | <a href="#">GLU297(C)</a>   | 1Z2BA |                                                                                                                      |               |
| 1Z2BA | <a href="#">CYS295(C)</a>  | 4.50 | <a href="#">GLU297(O)</a>   | 1Z2BA |                                                                                                                      | C[ ] ... O[ ] |
| 1Z2BA | <a href="#">CYS295(C)</a>  | 4.55 | <a href="#">GLU297(CB)</a>  | 1Z2BA |                                                                                                                      |               |
| 1Z2BA | <a href="#">CYS295(O)</a>  | 3.18 | <a href="#">GLU297(N)</a>   | 1Z2BA | [D-A-AA]:79.0° [A-D-DD]:140.2° d_planarity:-26.9°<br>a_planarity:43.9°, bad a_angle(sp2)                             | O[ ] ... N[ ] |
| 1Z2BA | <a href="#">CYS295(O)</a>  | 4.37 | <a href="#">GLU297(CA)</a>  | 1Z2BA |                                                                                                                      | O[ ] ... C[ ] |
| 1Z2BA | <a href="#">CYS295(O)</a>  | 4.53 | <a href="#">GLU297(C)</a>   | 1Z2BA |                                                                                                                      |               |
| 1Z2BA | <a href="#">CYS295(O)</a>  | 3.91 | <a href="#">GLU297(O)</a>   | 1Z2BA |                                                                                                                      | O[ ] ... O[ ] |
| 1Z2BA | <a href="#">CYS295(O)</a>  | 4.79 | <a href="#">GLU297(CB)</a>  | 1Z2BA |                                                                                                                      |               |
| 1Z2BA | <a href="#">CYS295(O)</a>  | 4.80 | <a href="#">GLN301(NE2)</a> | 1Z2BA | [D-A-AA]:145.8° [A-D-DD]:117.2° d_planarity:-9.2°<br>a_planarity:39.0°, maximum distance exceeded                    |               |
| 1Z2BA | <a href="#">CYS295(CB)</a> | 4.83 | <a href="#">LEU317(CD2)</a> | 1Z2BA |                                                                                                                      |               |
| 1Z2BA | <a href="#">CYS295(SG)</a> | 4.44 | <a href="#">LEU317(CD2)</a> | 1Z2BA |                                                                                                                      | S[ ] ... C[ ] |
| 1Z2BA | <a href="#">CYS295(SG)</a> | 4.80 | <a href="#">VAL375(C)</a>   | 1Z2BA |                                                                                                                      |               |
| 1Z2BA | <a href="#">CYS295(SG)</a> | 3.94 | <a href="#">VAL375(CB)</a>  | 1Z2BA |                                                                                                                      | S[ ] ... C[ ] |
| 1Z2BA | <a href="#">CYS295(SG)</a> | 4.02 | <a href="#">VAL375(CG1)</a> | 1Z2BA |                                                                                                                      | S[ ] ... C[ ] |
| 1Z2BA | <a href="#">CYS295(SG)</a> | 4.71 | <a href="#">VAL375(CG2)</a> | 1Z2BA |                                                                                                                      |               |
| 1Z2BA | <a href="#">CYS295(SG)</a> | 4.66 | <a href="#">CYS376(N)</a>   | 1Z2BA | [D-A-AA]:165.6° [A-D-DD]:98.4° d_planarity:-88.0°,<br>maximum distance exceeded, bad d_planarity                     |               |
| 1Z2BA | <a href="#">CYS295(SG)</a> | 4.72 | <a href="#">CYS376(C)</a>   | 1Z2BA |                                                                                                                      |               |
| 1Z2BA | <a href="#">CYS295(C)</a>  | 4.99 | <a href="#">MET377(CG)</a>  | 1Z2BA |                                                                                                                      |               |
| 1Z2BA | <a href="#">CYS295(C)</a>  | 4.94 | <a href="#">MET377(SD)</a>  | 1Z2BA |                                                                                                                      |               |
| 1Z2BA | <a href="#">CYS295(O)</a>  | 4.54 | <a href="#">MET377(CG)</a>  | 1Z2BA |                                                                                                                      |               |
| 1Z2BA | <a href="#">CYS295(O)</a>  | 4.75 | <a href="#">MET377(SD)</a>  | 1Z2BA |                                                                                                                      |               |
| 1Z2BA | <a href="#">CYS295(CB)</a> | 4.19 | <a href="#">MET377(CB)</a>  | 1Z2BA |                                                                                                                      | C[ ] ... C[ ] |
| 1Z2BA | <a href="#">CYS295(CB)</a> | 4.32 | <a href="#">MET377(CG)</a>  | 1Z2BA |                                                                                                                      | C[ ] ... C[ ] |
| 1Z2BA | <a href="#">CYS295(CB)</a> | 4.13 | <a href="#">MET377(SD)</a>  | 1Z2BA |                                                                                                                      | C[ ] ... S[ ] |
| 1Z2BA | <a href="#">CYS295(SG)</a> | 4.61 | <a href="#">MET377(N)</a>   | 1Z2BA | [D-A-AA]:130.5° [A-D-DD]:82.6° d_planarity:81.6°,<br>maximum distance exceeded, bad d_angle(sp2),<br>bad d_planarity |               |
| 1Z2BA | <a href="#">CYS295(SG)</a> | 4.65 | <a href="#">MET377(CA)</a>  | 1Z2BA |                                                                                                                      |               |
| 1Z2BA | <a href="#">CYS295(SG)</a> | 3.48 | <a href="#">MET377(CB)</a>  | 1Z2BA |                                                                                                                      | S[ ] ... C[ ] |
| 1Z2BA | <a href="#">CYS295(SG)</a> | 4.21 | <a href="#">MET377(CG)</a>  | 1Z2BA |                                                                                                                      | S[ ] ... C[ ] |
| 1Z2BA | <a href="#">CYS295(SG)</a> | 4.45 | <a href="#">MET377(SD)</a>  | 1Z2BA |                                                                                                                      | S[ ] ... S[ ] |



| chain1 | res1/atm1                  | distance | res2/atm2                   | chain2 | H-bonding                                                                                                                            | Charge interaction |
|--------|----------------------------|----------|-----------------------------|--------|--------------------------------------------------------------------------------------------------------------------------------------|--------------------|
| 1Z2BA  | <a href="#">CYS347(CB)</a> | 4.88     | <a href="#">MET313(CA)</a>  | 1Z2BA  |                                                                                                                                      |                    |
| 1Z2BA  | <a href="#">CYS347(CB)</a> | 4.84     | <a href="#">MET313(C)</a>   | 1Z2BA  |                                                                                                                                      |                    |
| 1Z2BA  | <a href="#">CYS347(CB)</a> | 4.23     | <a href="#">MET313(O)</a>   | 1Z2BA  |                                                                                                                                      | C [ ] ... O [ ]    |
| 1Z2BA  | <a href="#">CYS347(SG)</a> | 4.66     | <a href="#">MET313(CA)</a>  | 1Z2BA  |                                                                                                                                      |                    |
| 1Z2BA  | <a href="#">CYS347(SG)</a> | 4.37     | <a href="#">MET313(C)</a>   | 1Z2BA  |                                                                                                                                      | S [ ] ... C [ ]    |
| 1Z2BA  | <a href="#">CYS347(SG)</a> | 3.43     | <a href="#">MET313(O)</a>   | 1Z2BA  |                                                                                                                                      | S [ ] ... O [ ]    |
| 1Z2BA  | <a href="#">CYS347(SG)</a> | 4.78     | <a href="#">MET313(CB)</a>  | 1Z2BA  |                                                                                                                                      |                    |
| 1Z2BA  | <a href="#">CYS347(CA)</a> | 4.72     | <a href="#">PHE343(CD2)</a> | 1Z2BA  |                                                                                                                                      |                    |
| 1Z2BA  | <a href="#">CYS347(CA)</a> | 4.84     | <a href="#">PHE343(CE2)</a> | 1Z2BA  |                                                                                                                                      |                    |
| 1Z2BA  | <a href="#">CYS347(C)</a>  | 4.25     | <a href="#">PHE343(CD2)</a> | 1Z2BA  |                                                                                                                                      | C [ ] ... C [ ]    |
| 1Z2BA  | <a href="#">CYS347(C)</a>  | 4.50     | <a href="#">PHE343(CE2)</a> | 1Z2BA  |                                                                                                                                      | C [ ] ... C [ ]    |
| 1Z2BA  | <a href="#">CYS347(O)</a>  | 4.46     | <a href="#">PHE343(CB)</a>  | 1Z2BA  |                                                                                                                                      | O [ ] ... C [ ]    |
| 1Z2BA  | <a href="#">CYS347(O)</a>  | 4.27     | <a href="#">PHE343(CG)</a>  | 1Z2BA  |                                                                                                                                      | O [ ] ... C [ ]    |
| 1Z2BA  | <a href="#">CYS347(O)</a>  | 3.60     | <a href="#">PHE343(CD2)</a> | 1Z2BA  |                                                                                                                                      | O [ ] ... C [ ]    |
| 1Z2BA  | <a href="#">CYS347(O)</a>  | 4.20     | <a href="#">PHE343(CE2)</a> | 1Z2BA  |                                                                                                                                      | O [ ] ... C [ ]    |
| 1Z2BA  | <a href="#">CYS347(CB)</a> | 3.87     | <a href="#">PHE343(CD2)</a> | 1Z2BA  |                                                                                                                                      | C [ ] ... C [ ]    |
| 1Z2BA  | <a href="#">CYS347(CB)</a> | 3.84     | <a href="#">PHE343(CE2)</a> | 1Z2BA  |                                                                                                                                      | C [ ] ... C [ ]    |
| 1Z2BA  | <a href="#">CYS347(SG)</a> | 4.64     | <a href="#">PHE343(CE2)</a> | 1Z2BA  |                                                                                                                                      |                    |
| 1Z2BA  | <a href="#">CYS347(N)</a>  | 4.62     | <a href="#">VAL344(C)</a>   | 1Z2BA  |                                                                                                                                      |                    |
| 1Z2BA  | <a href="#">CYS347(N)</a>  | 3.46     | <a href="#">VAL344(O)</a>   | 1Z2BA  | [D-A-AA]:157.7° [A-D-DD]:111.7° d_planarity:-79.9°<br>a_planarity:36.9°, <b>bad d_planarity</b>                                      | N [ ] ... O [ ]    |
| 1Z2BA  | <a href="#">CYS347(CA)</a> | 4.22     | <a href="#">VAL344(O)</a>   | 1Z2BA  |                                                                                                                                      | C [ ] ... O [ ]    |
| 1Z2BA  | <a href="#">CYS347(C)</a>  | 4.77     | <a href="#">VAL344(O)</a>   | 1Z2BA  |                                                                                                                                      |                    |
| 1Z2BA  | <a href="#">CYS347(O)</a>  | 4.28     | <a href="#">VAL344(O)</a>   | 1Z2BA  |                                                                                                                                      | O [ ] ... O [ ]    |
| 1Z2BA  | <a href="#">CYS347(CB)</a> | 3.86     | <a href="#">VAL344(O)</a>   | 1Z2BA  |                                                                                                                                      | C [ ] ... O [ ]    |
| 1Z2BA  | <a href="#">CYS347(CB)</a> | 4.84     | <a href="#">VAL344(CG1)</a> | 1Z2BA  |                                                                                                                                      |                    |
| 1Z2BA  | <a href="#">CYS347(N)</a>  | 3.90     | <a href="#">ASP345(C)</a>   | 1Z2BA  |                                                                                                                                      | N [ ] ... C [ ]    |
| 1Z2BA  | <a href="#">CYS347(N)</a>  | 4.21     | <a href="#">ASP345(O)</a>   | 1Z2BA  | [D-A-AA]:67.4° [A-D-DD]:161.2° d_planarity:-16.6°<br>a_planarity:30.1°, <b>maximum distance exceeded,</b><br><b>bad a_angle(sp2)</b> | N [ ] ... O [ ]    |
| 1Z2BA  | <a href="#">CYS347(N)</a>  | 3.00     | <a href="#">TRP346(N)</a>   | 1Z2BA  |                                                                                                                                      | N [ ] ... N [ ]    |
| 1Z2BA  | <a href="#">CYS347(N)</a>  | 2.44     | <a href="#">TRP346(CA)</a>  | 1Z2BA  |                                                                                                                                      | N [ ] ... C [ ]    |
| 1Z2BA  | <a href="#">CYS347(N)</a>  | 2.25     | <a href="#">TRP346(O)</a>   | 1Z2BA  | [D-A-AA]:29.8° [A-D-DD]:95.1° d_planarity:2.2°<br>a_planarity:1.1°, <b>bad a_angle(sp2)</b>                                          | N [ ] ... O [ ]    |
| 1Z2BA  | <a href="#">CYS347(N)</a>  | 3.75     | <a href="#">TRP346(CB)</a>  | 1Z2BA  |                                                                                                                                      | N [ ] ... C [ ]    |
| 1Z2BA  | <a href="#">CYS347(N)</a>  | 4.47     | <a href="#">TRP346(CG)</a>  | 1Z2BA  |                                                                                                                                      | N [ ] ... C [ ]    |
| 1Z2BA  | <a href="#">CYS347(N)</a>  | 4.48     | <a href="#">TRP346(CD2)</a> | 1Z2BA  |                                                                                                                                      | N [ ] ... C [ ]    |
| 1Z2BA  | <a href="#">CYS347(N)</a>  | 3.97     | <a href="#">TRP346(CE3)</a> | 1Z2BA  |                                                                                                                                      | N [ ] ... C [ ]    |
| 1Z2BA  | <a href="#">CYS347(N)</a>  | 4.93     | <a href="#">TRP346(CZ3)</a> | 1Z2BA  |                                                                                                                                      |                    |
| 1Z2BA  | <a href="#">CYS347(CA)</a> | 4.35     | <a href="#">TRP346(N)</a>   | 1Z2BA  |                                                                                                                                      | C [ ] ... N [ ]    |
| 1Z2BA  | <a href="#">CYS347(CA)</a> | 3.82     | <a href="#">TRP346(CA)</a>  | 1Z2BA  |                                                                                                                                      | C [ ] ... C [ ]    |
| 1Z2BA  | <a href="#">CYS347(CA)</a> | 2.45     | <a href="#">TRP346(C)</a>   | 1Z2BA  |                                                                                                                                      | C [ ] ... C [ ]    |
| 1Z2BA  | <a href="#">CYS347(CA)</a> | 2.79     | <a href="#">TRP346(O)</a>   | 1Z2BA  |                                                                                                                                      | C [ ] ... O [ ]    |
| 1Z2BA  | <a href="#">CYS347(CA)</a> | 4.99     | <a href="#">TRP346(CB)</a>  | 1Z2BA  |                                                                                                                                      |                    |
| 1Z2BA  | <a href="#">CYS347(CA)</a> | 4.36     | <a href="#">TRP346(CE3)</a> | 1Z2BA  |                                                                                                                                      | C [ ] ... C [ ]    |
| 1Z2BA  | <a href="#">CYS347(CA)</a> | 4.99     | <a href="#">TRP346(CZ3)</a> | 1Z2BA  |                                                                                                                                      |                    |
| 1Z2BA  | <a href="#">CYS347(C)</a>  | 4.82     | <a href="#">TRP346(CA)</a>  | 1Z2BA  |                                                                                                                                      |                    |
| 1Z2BA  | <a href="#">CYS347(C)</a>  | 3.69     | <a href="#">TRP346(C)</a>   | 1Z2BA  |                                                                                                                                      | C [ ] ... C [ ]    |

|       |                            |      |                             |       |                                                                                      |               |
|-------|----------------------------|------|-----------------------------|-------|--------------------------------------------------------------------------------------|---------------|
| 1Z2BA | <a href="#">CYS347(C)</a>  | 4.25 | <a href="#">TRP346(O)</a>   | 1Z2BA |                                                                                      | C[ ] ... O[ ] |
| 1Z2BA | <a href="#">CYS347(O)</a>  | 4.16 | <a href="#">TRP346(C)</a>   | 1Z2BA |                                                                                      | O[ ] ... C[ ] |
| 1Z2BA | <a href="#">CYS347(O)</a>  | 4.93 | <a href="#">TRP346(O)</a>   | 1Z2BA |                                                                                      |               |
| 1Z2BA | <a href="#">CYS347(CB)</a> | 4.65 | <a href="#">TRP346(N)</a>   | 1Z2BA |                                                                                      |               |
| 1Z2BA | <a href="#">CYS347(CB)</a> | 4.43 | <a href="#">TRP346(CA)</a>  | 1Z2BA |                                                                                      | C[ ] ... C[ ] |
| 1Z2BA | <a href="#">CYS347(CB)</a> | 3.07 | <a href="#">TRP346(C)</a>   | 1Z2BA |                                                                                      | C[ ] ... C[ ] |
| 1Z2BA | <a href="#">CYS347(CB)</a> | 3.14 | <a href="#">TRP346(O)</a>   | 1Z2BA |                                                                                      | C[ ] ... O[ ] |
| 1Z2BA | <a href="#">CYS347(CB)</a> | 4.94 | <a href="#">TRP346(CD2)</a> | 1Z2BA |                                                                                      |               |
| 1Z2BA | <a href="#">CYS347(CB)</a> | 3.94 | <a href="#">TRP346(CE3)</a> | 1Z2BA |                                                                                      | C[ ] ... C[ ] |
| 1Z2BA | <a href="#">CYS347(CB)</a> | 4.21 | <a href="#">TRP346(CZ3)</a> | 1Z2BA |                                                                                      | C[ ] ... C[ ] |
| 1Z2BA | <a href="#">CYS347(SG)</a> | 3.78 | <a href="#">TRP346(C)</a>   | 1Z2BA |                                                                                      | S[ ] ... C[ ] |
| 1Z2BA | <a href="#">CYS347(SG)</a> | 3.20 | <a href="#">TRP346(O)</a>   | 1Z2BA |                                                                                      | S[ ] ... O[ ] |
| 1Z2BA | <a href="#">CYS347(SG)</a> | 4.71 | <a href="#">TRP346(CD2)</a> | 1Z2BA |                                                                                      |               |
| 1Z2BA | <a href="#">CYS347(SG)</a> | 3.40 | <a href="#">TRP346(CE3)</a> | 1Z2BA |                                                                                      | S[ ] ... C[ ] |
| 1Z2BA | <a href="#">CYS347(SG)</a> | 3.21 | <a href="#">TRP346(CZ3)</a> | 1Z2BA |                                                                                      | S[ ] ... C[ ] |
| 1Z2BA | <a href="#">CYS347(SG)</a> | 4.43 | <a href="#">TRP346(CH2)</a> | 1Z2BA |                                                                                      | S[ ] ... C[ ] |
| 1Z2BA | <a href="#">CYS347(N)</a>  | 3.47 | <a href="#">PRO348(N)</a>   | 1Z2BA |                                                                                      | N[ ] ... N[ ] |
| 1Z2BA | <a href="#">CYS347(N)</a>  | 4.64 | <a href="#">PRO348(CA)</a>  | 1Z2BA |                                                                                      |               |
| 1Z2BA | <a href="#">CYS347(N)</a>  | 4.16 | <a href="#">PRO348(CD)</a>  | 1Z2BA |                                                                                      | N[ ] ... C[ ] |
| 1Z2BA | <a href="#">CYS347(CA)</a> | 2.45 | <a href="#">PRO348(N)</a>   | 1Z2BA |                                                                                      | C[ ] ... N[ ] |
| 1Z2BA | <a href="#">CYS347(CA)</a> | 3.82 | <a href="#">PRO348(CA)</a>  | 1Z2BA |                                                                                      | C[ ] ... C[ ] |
| 1Z2BA | <a href="#">CYS347(CA)</a> | 4.39 | <a href="#">PRO348(C)</a>   | 1Z2BA |                                                                                      | C[ ] ... C[ ] |
| 1Z2BA | <a href="#">CYS347(CA)</a> | 4.63 | <a href="#">PRO348(O)</a>   | 1Z2BA |                                                                                      |               |
| 1Z2BA | <a href="#">CYS347(CA)</a> | 4.74 | <a href="#">PRO348(CB)</a>  | 1Z2BA |                                                                                      |               |
| 1Z2BA | <a href="#">CYS347(CA)</a> | 4.17 | <a href="#">PRO348(CG)</a>  | 1Z2BA |                                                                                      | C[ ] ... C[ ] |
| 1Z2BA | <a href="#">CYS347(CA)</a> | 2.97 | <a href="#">PRO348(CD)</a>  | 1Z2BA |                                                                                      | C[ ] ... C[ ] |
| 1Z2BA | <a href="#">CYS347(C)</a>  | 2.44 | <a href="#">PRO348(CA)</a>  | 1Z2BA |                                                                                      | C[ ] ... C[ ] |
| 1Z2BA | <a href="#">CYS347(C)</a>  | 2.87 | <a href="#">PRO348(C)</a>   | 1Z2BA |                                                                                      | C[ ] ... C[ ] |
| 1Z2BA | <a href="#">CYS347(C)</a>  | 3.16 | <a href="#">PRO348(O)</a>   | 1Z2BA |                                                                                      | C[ ] ... O[ ] |
| 1Z2BA | <a href="#">CYS347(C)</a>  | 3.56 | <a href="#">PRO348(CB)</a>  | 1Z2BA |                                                                                      | C[ ] ... C[ ] |
| 1Z2BA | <a href="#">CYS347(C)</a>  | 3.39 | <a href="#">PRO348(CG)</a>  | 1Z2BA |                                                                                      | C[ ] ... C[ ] |
| 1Z2BA | <a href="#">CYS347(C)</a>  | 2.50 | <a href="#">PRO348(CD)</a>  | 1Z2BA |                                                                                      | C[ ] ... C[ ] |
| 1Z2BA | <a href="#">CYS347(O)</a>  | 2.24 | <a href="#">PRO348(N)</a>   | 1Z2BA |                                                                                      | O[ ] ... N[ ] |
| 1Z2BA | <a href="#">CYS347(O)</a>  | 2.78 | <a href="#">PRO348(CA)</a>  | 1Z2BA |                                                                                      | O[ ] ... C[ ] |
| 1Z2BA | <a href="#">CYS347(O)</a>  | 2.54 | <a href="#">PRO348(C)</a>   | 1Z2BA |                                                                                      | O[ ] ... C[ ] |
| 1Z2BA | <a href="#">CYS347(O)</a>  | 2.43 | <a href="#">PRO348(O)</a>   | 1Z2BA |                                                                                      | O[ ] ... O[ ] |
| 1Z2BA | <a href="#">CYS347(O)</a>  | 4.07 | <a href="#">PRO348(CB)</a>  | 1Z2BA |                                                                                      | O[ ] ... C[ ] |
| 1Z2BA | <a href="#">CYS347(O)</a>  | 4.21 | <a href="#">PRO348(CG)</a>  | 1Z2BA |                                                                                      | O[ ] ... C[ ] |
| 1Z2BA | <a href="#">CYS347(O)</a>  | 3.60 | <a href="#">PRO348(CD)</a>  | 1Z2BA |                                                                                      | O[ ] ... C[ ] |
| 1Z2BA | <a href="#">CYS347(CB)</a> | 3.45 | <a href="#">PRO348(N)</a>   | 1Z2BA |                                                                                      | C[ ] ... N[ ] |
| 1Z2BA | <a href="#">CYS347(CB)</a> | 4.77 | <a href="#">PRO348(CA)</a>  | 1Z2BA |                                                                                      |               |
| 1Z2BA | <a href="#">CYS347(CB)</a> | 4.75 | <a href="#">PRO348(CG)</a>  | 1Z2BA |                                                                                      |               |
| 1Z2BA | <a href="#">CYS347(CB)</a> | 3.84 | <a href="#">PRO348(CD)</a>  | 1Z2BA |                                                                                      | C[ ] ... C[ ] |
| 1Z2BA | <a href="#">CYS347(SG)</a> | 4.58 | <a href="#">PRO348(N)</a>   | 1Z2BA |                                                                                      |               |
| 1Z2BA | <a href="#">CYS347(SG)</a> | 4.38 | <a href="#">PRO348(CD)</a>  | 1Z2BA |                                                                                      | S[ ] ... C[ ] |
| 1Z2BA | <a href="#">CYS347(C)</a>  | 3.73 | <a href="#">THR349(N)</a>   | 1Z2BA |                                                                                      | C[ ] ... N[ ] |
| 1Z2BA | <a href="#">CYS347(C)</a>  | 4.63 | <a href="#">THR349(CA)</a>  | 1Z2BA |                                                                                      |               |
| 1Z2BA | <a href="#">CYS347(O)</a>  | 3.41 | <a href="#">THR349(N)</a>   | 1Z2BA | <b>H-bond [D-A-AA]:95.1° [A-D-DD]:104.7° d_planarity:37.1°<br/>a_planarity:24.7°</b> | O[ ] ... N[ ] |

|       |                            |      |                             |                       |                                                                                                                         |               |
|-------|----------------------------|------|-----------------------------|-----------------------|-------------------------------------------------------------------------------------------------------------------------|---------------|
| 1Z2BA | <a href="#">CYS347(O)</a>  | 4.03 | <a href="#">THR349(CA)</a>  | 1Z2BA                 |                                                                                                                         | O[ ] ... C[ ] |
| 1Z2BA | <a href="#">CYS347(O)</a>  | 4.96 | <a href="#">THR349(CB)</a>  | 1Z2BA                 |                                                                                                                         |               |
| 1Z2BA | <a href="#">CYS347(O)</a>  | 4.94 | <a href="#">THR349(OG1)</a> | 1Z2BA                 | [D-A-AA]:119.4° [A-D-DD]:82.7° a_planarity:5.0°, <b>maximum distance exceeded</b>                                       |               |
| 1Z2BA | <a href="#">CYS347(O)</a>  | 4.94 | <a href="#">GLY350(N)</a>   | 1Z2BA                 | [D-A-AA]:87.7° [A-D-DD]:143.1° d_planarity:-11.4° a_planarity:52.2°, <b>maximum distance exceeded, bad a_angle(sp2)</b> |               |
| 1Z2BA | <a href="#">CYS347(N)</a>  | 4.18 | <a href="#">PRO27(CA)</a>   | <a href="#">1Z2BE</a> |                                                                                                                         | N[ ] ... C[ ] |
| 1Z2BA | <a href="#">CYS347(N)</a>  | 4.65 | <a href="#">PRO27(C)</a>    | <a href="#">1Z2BE</a> |                                                                                                                         |               |
| 1Z2BA | <a href="#">CYS347(N)</a>  | 4.32 | <a href="#">PRO27(O)</a>    | <a href="#">1Z2BE</a> | [D-A-AA]:97.5° [A-D-DD]:128.9° d_planarity:-34.6° a_planarity:-39.0°, <b>maximum distance exceeded</b>                  | N[ ] ... O[ ] |
| 1Z2BA | <a href="#">CYS347(N)</a>  | 3.56 | <a href="#">PRO27(CB)</a>   | <a href="#">1Z2BE</a> |                                                                                                                         | N[ ] ... C[ ] |
| 1Z2BA | <a href="#">CYS347(N)</a>  | 4.75 | <a href="#">PRO27(CG)</a>   | <a href="#">1Z2BE</a> |                                                                                                                         |               |
| 1Z2BA | <a href="#">CYS347(CA)</a> | 4.62 | <a href="#">PRO27(CA)</a>   | <a href="#">1Z2BE</a> |                                                                                                                         |               |
| 1Z2BA | <a href="#">CYS347(CA)</a> | 3.87 | <a href="#">PRO27(CB)</a>   | <a href="#">1Z2BE</a> |                                                                                                                         | C[ ] ... C[ ] |
| 1Z2BA | <a href="#">CYS347(CA)</a> | 4.68 | <a href="#">PRO27(CG)</a>   | <a href="#">1Z2BE</a> |                                                                                                                         |               |
| 1Z2BA | <a href="#">CYS347(C)</a>  | 4.75 | <a href="#">PRO27(N)</a>    | <a href="#">1Z2BE</a> |                                                                                                                         |               |
| 1Z2BA | <a href="#">CYS347(C)</a>  | 4.01 | <a href="#">PRO27(CA)</a>   | <a href="#">1Z2BE</a> |                                                                                                                         | C[ ] ... C[ ] |
| 1Z2BA | <a href="#">CYS347(C)</a>  | 3.62 | <a href="#">PRO27(CB)</a>   | <a href="#">1Z2BE</a> |                                                                                                                         | C[ ] ... C[ ] |
| 1Z2BA | <a href="#">CYS347(C)</a>  | 4.28 | <a href="#">PRO27(CG)</a>   | <a href="#">1Z2BE</a> |                                                                                                                         | C[ ] ... C[ ] |
| 1Z2BA | <a href="#">CYS347(C)</a>  | 4.78 | <a href="#">PRO27(CD)</a>   | <a href="#">1Z2BE</a> |                                                                                                                         |               |
| 1Z2BA | <a href="#">CYS347(O)</a>  | 4.93 | <a href="#">PRO27(N)</a>    | <a href="#">1Z2BE</a> |                                                                                                                         |               |
| 1Z2BA | <a href="#">CYS347(O)</a>  | 4.17 | <a href="#">PRO27(CA)</a>   | <a href="#">1Z2BE</a> |                                                                                                                         | O[ ] ... C[ ] |
| 1Z2BA | <a href="#">CYS347(O)</a>  | 4.93 | <a href="#">PRO27(O)</a>    | <a href="#">1Z2BE</a> |                                                                                                                         |               |
| 1Z2BA | <a href="#">CYS347(O)</a>  | 4.21 | <a href="#">PRO27(CB)</a>   | <a href="#">1Z2BE</a> |                                                                                                                         | O[ ] ... C[ ] |

| chain1 | res1/atm1                  | distance | res2/atm2                   | chain2 | H-bonding                                                                                                                               | Charge interaction |
|--------|----------------------------|----------|-----------------------------|--------|-----------------------------------------------------------------------------------------------------------------------------------------|--------------------|
| 1Z2BA  | <a href="#">CYS376(SG)</a> | 4.32     | <a href="#">ILE234(O)</a>   | 1Z2BA  |                                                                                                                                         | S[ ] ... O[ ]      |
| 1Z2BA  | <a href="#">CYS376(CB)</a> | 4.89     | <a href="#">SER237(O)</a>   | 1Z2BA  |                                                                                                                                         |                    |
| 1Z2BA  | <a href="#">CYS376(CB)</a> | 4.36     | <a href="#">SER237(CB)</a>  | 1Z2BA  |                                                                                                                                         | C[ ] ... C[ ]      |
| 1Z2BA  | <a href="#">CYS376(CB)</a> | 4.87     | <a href="#">SER237(OG)</a>  | 1Z2BA  |                                                                                                                                         |                    |
| 1Z2BA  | <a href="#">CYS376(SG)</a> | 4.59     | <a href="#">SER237(CA)</a>  | 1Z2BA  |                                                                                                                                         |                    |
| 1Z2BA  | <a href="#">CYS376(SG)</a> | 4.36     | <a href="#">SER237(C)</a>   | 1Z2BA  |                                                                                                                                         | S[ ] ... C[ ]      |
| 1Z2BA  | <a href="#">CYS376(SG)</a> | 4.49     | <a href="#">SER237(O)</a>   | 1Z2BA  |                                                                                                                                         | S[ ] ... O[ ]      |
| 1Z2BA  | <a href="#">CYS376(SG)</a> | 3.57     | <a href="#">SER237(CB)</a>  | 1Z2BA  |                                                                                                                                         | S[ ] ... C[ ]      |
| 1Z2BA  | <a href="#">CYS376(SG)</a> | 4.46     | <a href="#">SER237(OG)</a>  | 1Z2BA  | [D-A-AA]:92.3° [A-D-DD]:43.8°, <b>maximum distance exceeded, bad d_angle(sp3)</b>                                                       | S[ ] ... O[ ]      |
| 1Z2BA  | <a href="#">CYS376(SG)</a> | 4.64     | <a href="#">ILE238(N)</a>   | 1Z2BA  | [D-A-AA]:120.0° [A-D-DD]:102.6° d_planarity:73.5°, <b>maximum distance exceeded, bad d_planarity</b>                                    |                    |
| 1Z2BA  | <a href="#">CYS376(SG)</a> | 4.38     | <a href="#">ILE238(CG1)</a> | 1Z2BA  |                                                                                                                                         | S[ ] ... C[ ]      |
| 1Z2BA  | <a href="#">CYS376(SG)</a> | 4.84     | <a href="#">ILE238(CD1)</a> | 1Z2BA  |                                                                                                                                         |                    |
| 1Z2BA  | <a href="#">CYS376(N)</a>  | 4.30     | <a href="#">THR271(O)</a>   | 1Z2BA  | [D-A-AA]:159.2° [A-D-DD]:42.7° d_planarity:62.0° a_planarity:41.9°, <b>maximum distance exceeded, bad d_angle(sp2), bad d_planarity</b> | N[ ] ... O[ ]      |
| 1Z2BA  | <a href="#">CYS376(CA)</a> | 4.59     | <a href="#">THR271(C)</a>   | 1Z2BA  |                                                                                                                                         |                    |
| 1Z2BA  | <a href="#">CYS376(CA)</a> | 3.38     | <a href="#">THR271(O)</a>   | 1Z2BA  |                                                                                                                                         | C[ ] ... O[ ]      |
| 1Z2BA  | <a href="#">CYS376(C)</a>  | 4.73     | <a href="#">THR271(N)</a>   | 1Z2BA  |                                                                                                                                         |                    |
| 1Z2BA  | <a href="#">CYS376(C)</a>  | 4.85     | <a href="#">THR271(CA)</a>  | 1Z2BA  |                                                                                                                                         |                    |
| 1Z2BA  | <a href="#">CYS376(C)</a>  | 4.16     | <a href="#">THR271(C)</a>   | 1Z2BA  |                                                                                                                                         | C[ ] ... C[ ]      |

|       |                            |      |                             |       |                                                                                                                                     |               |
|-------|----------------------------|------|-----------------------------|-------|-------------------------------------------------------------------------------------------------------------------------------------|---------------|
| 1Z2BA | <a href="#">CYS376(C)</a>  | 2.98 | <a href="#">THR271(O)</a>   | 1Z2BA |                                                                                                                                     | C[ ] ... O[ ] |
| 1Z2BA | <a href="#">CYS376(C)</a>  | 4.92 | <a href="#">THR271(CB)</a>  | 1Z2BA |                                                                                                                                     |               |
| 1Z2BA | <a href="#">CYS376(O)</a>  | 3.56 | <a href="#">THR271(N)</a>   | 1Z2BA | [D-A-AA]:162.1° [A-D-DD]:88.9° d_planarity:-5.2°<br>a_planarity:64.5°, <b>maximum distance exceeded,</b><br><b>bad d_angle(sp2)</b> | O[ ] ... N[ ] |
| 1Z2BA | <a href="#">CYS376(O)</a>  | 3.83 | <a href="#">THR271(CA)</a>  | 1Z2BA |                                                                                                                                     | O[ ] ... C[ ] |
| 1Z2BA | <a href="#">CYS376(O)</a>  | 3.29 | <a href="#">THR271(C)</a>   | 1Z2BA |                                                                                                                                     | O[ ] ... C[ ] |
| 1Z2BA | <a href="#">CYS376(O)</a>  | 2.22 | <a href="#">THR271(O)</a>   | 1Z2BA |                                                                                                                                     | O[ ] ... O[ ] |
| 1Z2BA | <a href="#">CYS376(O)</a>  | 4.12 | <a href="#">THR271(CB)</a>  | 1Z2BA |                                                                                                                                     | O[ ] ... C[ ] |
| 1Z2BA | <a href="#">CYS376(O)</a>  | 4.91 | <a href="#">THR271(OG1)</a> | 1Z2BA | [D-A-AA]:129.2° [A-D-DD]:49.1° a_planarity:52.2°,<br><b>maximum distance exceeded, bad d_angle(sp3)</b>                             |               |
| 1Z2BA | <a href="#">CYS376(CB)</a> | 4.42 | <a href="#">THR271(O)</a>   | 1Z2BA |                                                                                                                                     | C[ ] ... O[ ] |
| 1Z2BA | <a href="#">CYS376(SG)</a> | 4.21 | <a href="#">THR271(O)</a>   | 1Z2BA |                                                                                                                                     | S[ ] ... O[ ] |
| 1Z2BA | <a href="#">CYS376(CA)</a> | 4.81 | <a href="#">TYR272(CA)</a>  | 1Z2BA |                                                                                                                                     |               |
| 1Z2BA | <a href="#">CYS376(O)</a>  | 4.39 | <a href="#">TYR272(N)</a>   | 1Z2BA | [D-A-AA]:122.6° [A-D-DD]:90.4° d_planarity:9.2°<br>a_planarity:-50.1°, <b>maximum distance exceeded</b>                             | O[ ] ... N[ ] |
| 1Z2BA | <a href="#">CYS376(O)</a>  | 4.64 | <a href="#">TYR272(CA)</a>  | 1Z2BA |                                                                                                                                     |               |
| 1Z2BA | <a href="#">CYS376(SG)</a> | 4.54 | <a href="#">TYR272(CD1)</a> | 1Z2BA |                                                                                                                                     |               |
| 1Z2BA | <a href="#">CYS376(N)</a>  | 4.97 | <a href="#">ALA273(N)</a>   | 1Z2BA |                                                                                                                                     |               |
| 1Z2BA | <a href="#">CYS376(N)</a>  | 4.69 | <a href="#">ALA273(CB)</a>  | 1Z2BA |                                                                                                                                     |               |
| 1Z2BA | <a href="#">CYS376(N)</a>  | 4.66 | <a href="#">CYS295(SG)</a>  | 1Z2BA | [D-A-AA]:165.6° [A-D-DD]:98.4° d_planarity:-88.0°,<br><b>maximum distance exceeded, bad d_planarity</b>                             |               |
| 1Z2BA | <a href="#">CYS376(C)</a>  | 4.72 | <a href="#">CYS295(SG)</a>  | 1Z2BA |                                                                                                                                     |               |
| 1Z2BA | <a href="#">CYS376(C)</a>  | 4.63 | <a href="#">CYS316(O)</a>   | 1Z2BA |                                                                                                                                     |               |
| 1Z2BA | <a href="#">CYS376(N)</a>  | 3.98 | <a href="#">LEU318(N)</a>   | 1Z2BA |                                                                                                                                     | N[ ] ... N[ ] |
| 1Z2BA | <a href="#">CYS376(N)</a>  | 4.15 | <a href="#">LEU318(CA)</a>  | 1Z2BA |                                                                                                                                     | N[ ] ... C[ ] |
| 1Z2BA | <a href="#">CYS376(N)</a>  | 3.60 | <a href="#">LEU318(C)</a>   | 1Z2BA |                                                                                                                                     | N[ ] ... C[ ] |
| 1Z2BA | <a href="#">CYS376(N)</a>  | 2.82 | <a href="#">LEU318(O)</a>   | 1Z2BA | [D-A-AA]:119.9° [A-D-DD]:105.2° d_planarity:-75.0°<br>a_planarity:-69.5°, <b>bad d_planarity</b>                                    | N[ ] ... O[ ] |
| 1Z2BA | <a href="#">CYS376(N)</a>  | 4.40 | <a href="#">LEU318(CB)</a>  | 1Z2BA |                                                                                                                                     | N[ ] ... C[ ] |
| 1Z2BA | <a href="#">CYS376(CA)</a> | 4.27 | <a href="#">LEU318(N)</a>   | 1Z2BA |                                                                                                                                     | C[ ] ... N[ ] |
| 1Z2BA | <a href="#">CYS376(CA)</a> | 4.46 | <a href="#">LEU318(CA)</a>  | 1Z2BA |                                                                                                                                     | C[ ] ... C[ ] |
| 1Z2BA | <a href="#">CYS376(CA)</a> | 4.29 | <a href="#">LEU318(C)</a>   | 1Z2BA |                                                                                                                                     | C[ ] ... C[ ] |
| 1Z2BA | <a href="#">CYS376(CA)</a> | 3.48 | <a href="#">LEU318(O)</a>   | 1Z2BA |                                                                                                                                     | C[ ] ... O[ ] |
| 1Z2BA | <a href="#">CYS376(CA)</a> | 4.25 | <a href="#">LEU318(CB)</a>  | 1Z2BA |                                                                                                                                     | C[ ] ... C[ ] |
| 1Z2BA | <a href="#">CYS376(C)</a>  | 4.33 | <a href="#">LEU318(N)</a>   | 1Z2BA |                                                                                                                                     | C[ ] ... N[ ] |
| 1Z2BA | <a href="#">CYS376(C)</a>  | 4.92 | <a href="#">LEU318(CA)</a>  | 1Z2BA |                                                                                                                                     |               |
| 1Z2BA | <a href="#">CYS376(C)</a>  | 4.62 | <a href="#">LEU318(O)</a>   | 1Z2BA |                                                                                                                                     |               |
| 1Z2BA | <a href="#">CYS376(C)</a>  | 4.70 | <a href="#">LEU318(CB)</a>  | 1Z2BA |                                                                                                                                     |               |
| 1Z2BA | <a href="#">CYS376(CB)</a> | 4.13 | <a href="#">LEU318(N)</a>   | 1Z2BA |                                                                                                                                     | C[ ] ... N[ ] |
| 1Z2BA | <a href="#">CYS376(CB)</a> | 3.90 | <a href="#">LEU318(CA)</a>  | 1Z2BA |                                                                                                                                     | C[ ] ... C[ ] |
| 1Z2BA | <a href="#">CYS376(CB)</a> | 3.85 | <a href="#">LEU318(C)</a>   | 1Z2BA |                                                                                                                                     | C[ ] ... C[ ] |
| 1Z2BA | <a href="#">CYS376(CB)</a> | 3.02 | <a href="#">LEU318(O)</a>   | 1Z2BA |                                                                                                                                     | C[ ] ... O[ ] |
| 1Z2BA | <a href="#">CYS376(CB)</a> | 3.25 | <a href="#">LEU318(CB)</a>  | 1Z2BA |                                                                                                                                     | C[ ] ... C[ ] |
| 1Z2BA | <a href="#">CYS376(CB)</a> | 4.51 | <a href="#">LEU318(CG)</a>  | 1Z2BA |                                                                                                                                     |               |
| 1Z2BA | <a href="#">CYS376(CB)</a> | 4.73 | <a href="#">LEU318(CD1)</a> | 1Z2BA |                                                                                                                                     |               |
| 1Z2BA | <a href="#">CYS376(SG)</a> | 4.65 | <a href="#">LEU318(O)</a>   | 1Z2BA |                                                                                                                                     |               |
| 1Z2BA | <a href="#">CYS376(SG)</a> | 4.45 | <a href="#">LEU318(CB)</a>  | 1Z2BA |                                                                                                                                     | S[ ] ... C[ ] |
| 1Z2BA | <a href="#">CYS376(N)</a>  | 4.55 | <a href="#">TYR319(N)</a>   | 1Z2BA |                                                                                                                                     |               |
| 1Z2BA | <a href="#">CYS376(N)</a>  | 4.98 | <a href="#">TYR319(CA)</a>  | 1Z2BA |                                                                                                                                     |               |
| 1Z2BA | <a href="#">CYS376(N)</a>  | 4.43 | <a href="#">ALA374(C)</a>   | 1Z2BA |                                                                                                                                     | N[ ] ... C[ ] |

|       |                            |      |                             |       |                                                                                                                       |               |
|-------|----------------------------|------|-----------------------------|-------|-----------------------------------------------------------------------------------------------------------------------|---------------|
| 1Z2BA | <a href="#">CYS376(N)</a>  | 4.43 | <a href="#">ALA374(O)</a>   | 1Z2BA | [D-A-AA]:82.3° [A-D-DD]:135.2° d_planarity:50.7°<br>a_planarity:24.1°, maximum distance exceeded,<br>bad a_angle(sp2) | N[ ] ... O[ ] |
| 1Z2BA | <a href="#">CYS376(N)</a>  | 3.66 | <a href="#">VAL375(N)</a>   | 1Z2BA |                                                                                                                       | N[ ] ... N[ ] |
| 1Z2BA | <a href="#">CYS376(N)</a>  | 2.45 | <a href="#">VAL375(CA)</a>  | 1Z2BA |                                                                                                                       | N[ ] ... C[ ] |
| 1Z2BA | <a href="#">CYS376(N)</a>  | 2.26 | <a href="#">VAL375(O)</a>   | 1Z2BA | [D-A-AA]:29.9° [A-D-DD]:91.5° d_planarity:0.4°<br>a_planarity:0.2°, bad a_angle(sp2)                                  | N[ ] ... O[ ] |
| 1Z2BA | <a href="#">CYS376(N)</a>  | 3.09 | <a href="#">VAL375(CB)</a>  | 1Z2BA |                                                                                                                       | N[ ] ... C[ ] |
| 1Z2BA | <a href="#">CYS376(N)</a>  | 3.26 | <a href="#">VAL375(CG1)</a> | 1Z2BA |                                                                                                                       | N[ ] ... C[ ] |
| 1Z2BA | <a href="#">CYS376(N)</a>  | 4.54 | <a href="#">VAL375(CG2)</a> | 1Z2BA |                                                                                                                       |               |
| 1Z2BA | <a href="#">CYS376(CA)</a> | 4.83 | <a href="#">VAL375(N)</a>   | 1Z2BA |                                                                                                                       |               |
| 1Z2BA | <a href="#">CYS376(CA)</a> | 3.79 | <a href="#">VAL375(CA)</a>  | 1Z2BA |                                                                                                                       | C[ ] ... C[ ] |
| 1Z2BA | <a href="#">CYS376(CA)</a> | 2.39 | <a href="#">VAL375(C)</a>   | 1Z2BA |                                                                                                                       | C[ ] ... C[ ] |
| 1Z2BA | <a href="#">CYS376(CA)</a> | 2.71 | <a href="#">VAL375(O)</a>   | 1Z2BA |                                                                                                                       | C[ ] ... O[ ] |
| 1Z2BA | <a href="#">CYS376(CA)</a> | 4.42 | <a href="#">VAL375(CB)</a>  | 1Z2BA |                                                                                                                       | C[ ] ... C[ ] |
| 1Z2BA | <a href="#">CYS376(CA)</a> | 4.57 | <a href="#">VAL375(CG1)</a> | 1Z2BA |                                                                                                                       |               |
| 1Z2BA | <a href="#">CYS376(C)</a>  | 4.91 | <a href="#">VAL375(CA)</a>  | 1Z2BA |                                                                                                                       |               |
| 1Z2BA | <a href="#">CYS376(C)</a>  | 3.65 | <a href="#">VAL375(C)</a>   | 1Z2BA |                                                                                                                       | C[ ] ... C[ ] |
| 1Z2BA | <a href="#">CYS376(C)</a>  | 4.00 | <a href="#">VAL375(O)</a>   | 1Z2BA |                                                                                                                       | C[ ] ... O[ ] |
| 1Z2BA | <a href="#">CYS376(O)</a>  | 4.47 | <a href="#">VAL375(C)</a>   | 1Z2BA |                                                                                                                       | O[ ] ... C[ ] |
| 1Z2BA | <a href="#">CYS376(O)</a>  | 4.54 | <a href="#">VAL375(O)</a>   | 1Z2BA |                                                                                                                       |               |
| 1Z2BA | <a href="#">CYS376(CB)</a> | 4.55 | <a href="#">VAL375(CA)</a>  | 1Z2BA |                                                                                                                       |               |
| 1Z2BA | <a href="#">CYS376(CB)</a> | 3.24 | <a href="#">VAL375(C)</a>   | 1Z2BA |                                                                                                                       | C[ ] ... C[ ] |
| 1Z2BA | <a href="#">CYS376(CB)</a> | 3.44 | <a href="#">VAL375(O)</a>   | 1Z2BA |                                                                                                                       | C[ ] ... O[ ] |
| 1Z2BA | <a href="#">CYS376(SG)</a> | 4.54 | <a href="#">VAL375(C)</a>   | 1Z2BA |                                                                                                                       |               |
| 1Z2BA | <a href="#">CYS376(SG)</a> | 4.27 | <a href="#">VAL375(O)</a>   | 1Z2BA |                                                                                                                       | S[ ] ... O[ ] |
| 1Z2BA | <a href="#">CYS376(N)</a>  | 2.99 | <a href="#">MET377(N)</a>   | 1Z2BA |                                                                                                                       | N[ ] ... N[ ] |
| 1Z2BA | <a href="#">CYS376(N)</a>  | 4.37 | <a href="#">MET377(CA)</a>  | 1Z2BA |                                                                                                                       | N[ ] ... C[ ] |
| 1Z2BA | <a href="#">CYS376(N)</a>  | 4.71 | <a href="#">MET377(CB)</a>  | 1Z2BA |                                                                                                                       |               |
| 1Z2BA | <a href="#">CYS376(CA)</a> | 2.47 | <a href="#">MET377(N)</a>   | 1Z2BA |                                                                                                                       | C[ ] ... N[ ] |
| 1Z2BA | <a href="#">CYS376(CA)</a> | 3.82 | <a href="#">MET377(CA)</a>  | 1Z2BA |                                                                                                                       | C[ ] ... C[ ] |
| 1Z2BA | <a href="#">CYS376(CA)</a> | 4.58 | <a href="#">MET377(C)</a>   | 1Z2BA |                                                                                                                       |               |
| 1Z2BA | <a href="#">CYS376(CA)</a> | 4.90 | <a href="#">MET377(O)</a>   | 1Z2BA |                                                                                                                       |               |
| 1Z2BA | <a href="#">CYS376(CA)</a> | 4.32 | <a href="#">MET377(CB)</a>  | 1Z2BA |                                                                                                                       | C[ ] ... C[ ] |
| 1Z2BA | <a href="#">CYS376(C)</a>  | 2.42 | <a href="#">MET377(CA)</a>  | 1Z2BA |                                                                                                                       | C[ ] ... C[ ] |
| 1Z2BA | <a href="#">CYS376(C)</a>  | 3.08 | <a href="#">MET377(C)</a>   | 1Z2BA |                                                                                                                       | C[ ] ... C[ ] |
| 1Z2BA | <a href="#">CYS376(C)</a>  | 3.42 | <a href="#">MET377(O)</a>   | 1Z2BA |                                                                                                                       | C[ ] ... O[ ] |
| 1Z2BA | <a href="#">CYS376(C)</a>  | 3.03 | <a href="#">MET377(CB)</a>  | 1Z2BA |                                                                                                                       | C[ ] ... C[ ] |
| 1Z2BA | <a href="#">CYS376(C)</a>  | 4.43 | <a href="#">MET377(CG)</a>  | 1Z2BA |                                                                                                                       | C[ ] ... C[ ] |
| 1Z2BA | <a href="#">CYS376(O)</a>  | 2.22 | <a href="#">MET377(N)</a>   | 1Z2BA | [D-A-AA]:30.6° [A-D-DD]:92.4° d_planarity:6.3°<br>a_planarity:1.2°, bad a_angle(sp2)                                  | O[ ] ... N[ ] |
| 1Z2BA | <a href="#">CYS376(O)</a>  | 2.71 | <a href="#">MET377(CA)</a>  | 1Z2BA |                                                                                                                       | O[ ] ... C[ ] |
| 1Z2BA | <a href="#">CYS376(O)</a>  | 2.84 | <a href="#">MET377(C)</a>   | 1Z2BA |                                                                                                                       | O[ ] ... C[ ] |
| 1Z2BA | <a href="#">CYS376(O)</a>  | 2.73 | <a href="#">MET377(O)</a>   | 1Z2BA |                                                                                                                       | O[ ] ... O[ ] |
| 1Z2BA | <a href="#">CYS376(O)</a>  | 3.10 | <a href="#">MET377(CB)</a>  | 1Z2BA |                                                                                                                       | O[ ] ... C[ ] |
| 1Z2BA | <a href="#">CYS376(O)</a>  | 4.27 | <a href="#">MET377(CG)</a>  | 1Z2BA |                                                                                                                       | O[ ] ... C[ ] |
| 1Z2BA | <a href="#">CYS376(CB)</a> | 3.31 | <a href="#">MET377(N)</a>   | 1Z2BA |                                                                                                                       | C[ ] ... N[ ] |
| 1Z2BA | <a href="#">CYS376(CB)</a> | 4.66 | <a href="#">MET377(CA)</a>  | 1Z2BA |                                                                                                                       |               |
| 1Z2BA | <a href="#">CYS376(SG)</a> | 4.35 | <a href="#">MET377(N)</a>   | 1Z2BA | [D-A-AA]:44.1° [A-D-DD]:130.9° d_planarity:34.6°,<br>maximum distance exceeded, bad a_angle(sp3)                      | S[ ] ... N[ ] |

|       |                             |      |                              |       |                                                                                                                                      |                 |
|-------|-----------------------------|------|------------------------------|-------|--------------------------------------------------------------------------------------------------------------------------------------|-----------------|
| 1Z2BA | <a href="#">CYS376</a> (C)  | 3.99 | <a href="#">LEU378</a> (N)   | 1Z2BA |                                                                                                                                      | C [ ] ... N [ ] |
| 1Z2BA | <a href="#">CYS376</a> (C)  | 4.84 | <a href="#">LEU378</a> (CD2) | 1Z2BA |                                                                                                                                      |                 |
| 1Z2BA | <a href="#">CYS376</a> (O)  | 3.89 | <a href="#">LEU378</a> (N)   | 1Z2BA | [D-A-AA]:85.6° [A-D-DD]:121.5° d_planarity:37.2°<br>a_planarity:27.2°, <b>maximum distance exceeded</b> ,<br><b>bad a_angle(sp2)</b> | O [ ] ... N [ ] |
| 1Z2BA | <a href="#">CYS376</a> (O)  | 4.81 | <a href="#">LEU378</a> (CA)  | 1Z2BA |                                                                                                                                      |                 |
| 1Z2BA | <a href="#">CYS376</a> (O)  | 4.76 | <a href="#">LEU378</a> (CG)  | 1Z2BA |                                                                                                                                      |                 |
| 1Z2BA | <a href="#">CYS376</a> (O)  | 4.18 | <a href="#">LEU378</a> (CD2) | 1Z2BA |                                                                                                                                      | O [ ] ... C [ ] |
| 1Z2BA | <a href="#">CYS376</a> (SG) | 4.77 | <a href="#">LEU378</a> (CD2) | 1Z2BA |                                                                                                                                      |                 |

| chain1 | res1/atm1                   | distance | res2/atm2                   | chain2 | H-bonding                                                                                               | Charge interaction |
|--------|-----------------------------|----------|-----------------------------|--------|---------------------------------------------------------------------------------------------------------|--------------------|
| 2BTPA  | <a href="#">CYS134</a> (N)  | 4.27     | <a href="#">VAL132</a> (C)  | 2BTPA  |                                                                                                         | N [ ] ... C [ ]    |
| 2BTPA  | <a href="#">CYS134</a> (N)  | 4.04     | <a href="#">VAL132</a> (O)  | 2BTPA  | [D-A-AA]:92.5° [A-D-DD]:125.3° d_planarity:50.6°<br>a_planarity:19.4°, <b>maximum distance exceeded</b> | N [ ] ... O [ ]    |
| 2BTPA  | <a href="#">CYS134</a> (CB) | 4.94     | <a href="#">VAL132</a> (O)  | 2BTPA  |                                                                                                         |                    |
| 2BTPA  | <a href="#">CYS134</a> (N)  | 3.67     | <a href="#">ALA133</a> (N)  | 2BTPA  |                                                                                                         | N [ ] ... N [ ]    |
| 2BTPA  | <a href="#">CYS134</a> (N)  | 2.41     | <a href="#">ALA133</a> (CA) | 2BTPA  |                                                                                                         | N [ ] ... C [ ]    |
| 2BTPA  | <a href="#">CYS134</a> (N)  | 2.25     | <a href="#">ALA133</a> (O)  | 2BTPA  | [D-A-AA]:29.5° [A-D-DD]:97.3° d_planarity:1.4°<br>a_planarity:1.8°, <b>bad a_angle(sp2)</b>             | N [ ] ... O [ ]    |
| 2BTPA  | <a href="#">CYS134</a> (N)  | 3.03     | <a href="#">ALA133</a> (CB) | 2BTPA  |                                                                                                         | N [ ] ... C [ ]    |
| 2BTPA  | <a href="#">CYS134</a> (CA) | 4.96     | <a href="#">ALA133</a> (N)  | 2BTPA  |                                                                                                         |                    |
| 2BTPA  | <a href="#">CYS134</a> (CA) | 3.84     | <a href="#">ALA133</a> (CA) | 2BTPA  |                                                                                                         | C [ ] ... C [ ]    |
| 2BTPA  | <a href="#">CYS134</a> (CA) | 2.50     | <a href="#">ALA133</a> (C)  | 2BTPA  |                                                                                                         | C [ ] ... C [ ]    |
| 2BTPA  | <a href="#">CYS134</a> (CA) | 2.86     | <a href="#">ALA133</a> (O)  | 2BTPA  |                                                                                                         | C [ ] ... O [ ]    |
| 2BTPA  | <a href="#">CYS134</a> (CA) | 4.41     | <a href="#">ALA133</a> (CB) | 2BTPA  |                                                                                                         | C [ ] ... C [ ]    |
| 2BTPA  | <a href="#">CYS134</a> (C)  | 4.86     | <a href="#">ALA133</a> (CA) | 2BTPA  |                                                                                                         |                    |
| 2BTPA  | <a href="#">CYS134</a> (C)  | 3.73     | <a href="#">ALA133</a> (C)  | 2BTPA  |                                                                                                         | C [ ] ... C [ ]    |
| 2BTPA  | <a href="#">CYS134</a> (C)  | 4.24     | <a href="#">ALA133</a> (O)  | 2BTPA  |                                                                                                         | C [ ] ... O [ ]    |
| 2BTPA  | <a href="#">CYS134</a> (O)  | 4.80     | <a href="#">ALA133</a> (CA) | 2BTPA  |                                                                                                         |                    |
| 2BTPA  | <a href="#">CYS134</a> (O)  | 3.98     | <a href="#">ALA133</a> (C)  | 2BTPA  |                                                                                                         | O [ ] ... C [ ]    |
| 2BTPA  | <a href="#">CYS134</a> (O)  | 4.74     | <a href="#">ALA133</a> (O)  | 2BTPA  |                                                                                                         |                    |
| 2BTPA  | <a href="#">CYS134</a> (O)  | 4.68     | <a href="#">ALA133</a> (CB) | 2BTPA  |                                                                                                         |                    |
| 2BTPA  | <a href="#">CYS134</a> (CB) | 4.55     | <a href="#">ALA133</a> (CA) | 2BTPA  |                                                                                                         |                    |
| 2BTPA  | <a href="#">CYS134</a> (CB) | 3.29     | <a href="#">ALA133</a> (C)  | 2BTPA  |                                                                                                         | C [ ] ... C [ ]    |
| 2BTPA  | <a href="#">CYS134</a> (CB) | 3.55     | <a href="#">ALA133</a> (O)  | 2BTPA  |                                                                                                         | C [ ] ... O [ ]    |
| 2BTPA  | <a href="#">CYS134</a> (SG) | 4.70     | <a href="#">ALA133</a> (CA) | 2BTPA  |                                                                                                         |                    |
| 2BTPA  | <a href="#">CYS134</a> (SG) | 3.91     | <a href="#">ALA133</a> (C)  | 2BTPA  |                                                                                                         | S [ ] ... C [ ]    |
| 2BTPA  | <a href="#">CYS134</a> (SG) | 4.60     | <a href="#">ALA133</a> (O)  | 2BTPA  |                                                                                                         |                    |
| 2BTPA  | <a href="#">CYS134</a> (N)  | 3.74     | <a href="#">GLY135</a> (N)  | 2BTPA  |                                                                                                         | N [ ] ... N [ ]    |
| 2BTPA  | <a href="#">CYS134</a> (N)  | 4.98     | <a href="#">GLY135</a> (CA) | 2BTPA  |                                                                                                         |                    |
| 2BTPA  | <a href="#">CYS134</a> (CA) | 2.48     | <a href="#">GLY135</a> (N)  | 2BTPA  |                                                                                                         | C [ ] ... N [ ]    |
| 2BTPA  | <a href="#">CYS134</a> (CA) | 3.87     | <a href="#">GLY135</a> (CA) | 2BTPA  |                                                                                                         | C [ ] ... C [ ]    |
| 2BTPA  | <a href="#">CYS134</a> (CA) | 4.40     | <a href="#">GLY135</a> (C)  | 2BTPA  |                                                                                                         | C [ ] ... C [ ]    |
| 2BTPA  | <a href="#">CYS134</a> (CA) | 4.39     | <a href="#">GLY135</a> (O)  | 2BTPA  |                                                                                                         | C [ ] ... O [ ]    |
| 2BTPA  | <a href="#">CYS134</a> (C)  | 2.46     | <a href="#">GLY135</a> (CA) | 2BTPA  |                                                                                                         | C [ ] ... C [ ]    |
| 2BTPA  | <a href="#">CYS134</a> (C)  | 2.91     | <a href="#">GLY135</a> (C)  | 2BTPA  |                                                                                                         | C [ ] ... C [ ]    |

|       |                             |      |                              |       |                                                                                                                 |               |
|-------|-----------------------------|------|------------------------------|-------|-----------------------------------------------------------------------------------------------------------------|---------------|
| 2BTPA | <a href="#">CYS134</a> (C)  | 3.13 | <a href="#">GLY135</a> (O)   | 2BTPA |                                                                                                                 | C[ ] ... O[ ] |
| 2BTPA | <a href="#">CYS134</a> (O)  | 2.25 | <a href="#">GLY135</a> (N)   | 2BTPA | [D-A-AA]:30.3° [A-D-DD]:94.0° d_planarity:2.7°<br>a_planarity:1.5°, <b>bad a_angle(sp2)</b>                     | O[ ] ... N[ ] |
| 2BTPA | <a href="#">CYS134</a> (O)  | 2.78 | <a href="#">GLY135</a> (CA)  | 2BTPA |                                                                                                                 | O[ ] ... C[ ] |
| 2BTPA | <a href="#">CYS134</a> (O)  | 2.69 | <a href="#">GLY135</a> (C)   | 2BTPA |                                                                                                                 | O[ ] ... C[ ] |
| 2BTPA | <a href="#">CYS134</a> (O)  | 2.96 | <a href="#">GLY135</a> (O)   | 2BTPA |                                                                                                                 | O[ ] ... O[ ] |
| 2BTPA | <a href="#">CYS134</a> (CB) | 2.96 | <a href="#">GLY135</a> (N)   | 2BTPA |                                                                                                                 | C[ ] ... N[ ] |
| 2BTPA | <a href="#">CYS134</a> (CB) | 4.37 | <a href="#">GLY135</a> (CA)  | 2BTPA |                                                                                                                 | C[ ] ... C[ ] |
| 2BTPA | <a href="#">CYS134</a> (SG) | 3.67 | <a href="#">GLY135</a> (N)   | 2BTPA | [D-A-AA]:52.9° [A-D-DD]:131.3° d_planarity:66.7°,<br><b>bad a_angle(sp3), bad d_planarity</b>                   | S[ ] ... N[ ] |
| 2BTPA | <a href="#">CYS134</a> (SG) | 4.78 | <a href="#">GLY135</a> (CA)  | 2BTPA |                                                                                                                 |               |
| 2BTPA | <a href="#">CYS134</a> (C)  | 3.81 | <a href="#">ASPI36</a> (N)   | 2BTPA |                                                                                                                 | C[ ] ... N[ ] |
| 2BTPA | <a href="#">CYS134</a> (C)  | 4.90 | <a href="#">ASPI36</a> (CA)  | 2BTPA |                                                                                                                 |               |
| 2BTPA | <a href="#">CYS134</a> (C)  | 4.99 | <a href="#">ASPI36</a> (C)   | 2BTPA |                                                                                                                 |               |
| 2BTPA | <a href="#">CYS134</a> (O)  | 3.23 | <a href="#">ASPI36</a> (N)   | 2BTPA | [D-A-AA]:108.1° [A-D-DD]:117.1° d_planarity:63.6°<br>a_planarity:10.4°, <b>bad d_planarity</b>                  | O[ ] ... N[ ] |
| 2BTPA | <a href="#">CYS134</a> (O)  | 4.12 | <a href="#">ASPI36</a> (CA)  | 2BTPA |                                                                                                                 | O[ ] ... C[ ] |
| 2BTPA | <a href="#">CYS134</a> (O)  | 3.93 | <a href="#">ASPI36</a> (C)   | 2BTPA |                                                                                                                 | O[ ] ... C[ ] |
| 2BTPA | <a href="#">CYS134</a> (O)  | 4.85 | <a href="#">ASPI36</a> (O)   | 2BTPA |                                                                                                                 |               |
| 2BTPA | <a href="#">CYS134</a> (N)  | 4.80 | <a href="#">ASPI37</a> (C)   | 2BTPA |                                                                                                                 |               |
| 2BTPA | <a href="#">CYS134</a> (N)  | 4.54 | <a href="#">ASPI37</a> (CB)  | 2BTPA |                                                                                                                 |               |
| 2BTPA | <a href="#">CYS134</a> (N)  | 4.76 | <a href="#">ASPI37</a> (OD2) | 2BTPA | [D-A-AA]:97.7° [A-D-DD]:134.7° d_planarity:-18.9°<br>a_planarity:33.5°, <b>maximum distance exceeded</b>        |               |
| 2BTPA | <a href="#">CYS134</a> (C)  | 4.44 | <a href="#">ASPI37</a> (N)   | 2BTPA |                                                                                                                 | C[ ] ... N[ ] |
| 2BTPA | <a href="#">CYS134</a> (C)  | 4.79 | <a href="#">ASPI37</a> (CA)  | 2BTPA |                                                                                                                 |               |
| 2BTPA | <a href="#">CYS134</a> (C)  | 4.69 | <a href="#">ASPI37</a> (C)   | 2BTPA |                                                                                                                 |               |
| 2BTPA | <a href="#">CYS134</a> (C)  | 4.41 | <a href="#">ASPI37</a> (CB)  | 2BTPA |                                                                                                                 | C[ ] ... C[ ] |
| 2BTPA | <a href="#">CYS134</a> (O)  | 3.27 | <a href="#">ASPI37</a> (N)   | 2BTPA | [D-A-AA]:158.0° [A-D-DD]:88.8° d_planarity:-66.6°<br>a_planarity:8.2°, <b>bad d_angle(sp2), bad d_planarity</b> | O[ ] ... N[ ] |
| 2BTPA | <a href="#">CYS134</a> (O)  | 3.55 | <a href="#">ASPI37</a> (CA)  | 2BTPA |                                                                                                                 | O[ ] ... C[ ] |
| 2BTPA | <a href="#">CYS134</a> (O)  | 3.55 | <a href="#">ASPI37</a> (C)   | 2BTPA |                                                                                                                 | O[ ] ... C[ ] |
| 2BTPA | <a href="#">CYS134</a> (O)  | 4.69 | <a href="#">ASPI37</a> (O)   | 2BTPA |                                                                                                                 |               |
| 2BTPA | <a href="#">CYS134</a> (O)  | 3.25 | <a href="#">ASPI37</a> (CB)  | 2BTPA |                                                                                                                 | O[ ] ... C[ ] |
| 2BTPA | <a href="#">CYS134</a> (O)  | 4.51 | <a href="#">ASPI37</a> (CG)  | 2BTPA |                                                                                                                 |               |
| 2BTPA | <a href="#">CYS134</a> (O)  | 4.80 | <a href="#">ASPI37</a> (OD2) | 2BTPA |                                                                                                                 |               |
| 2BTPA | <a href="#">CYS134</a> (N)  | 4.01 | <a href="#">ARG138</a> (N)   | 2BTPA |                                                                                                                 | N[ ] ... N[ ] |
| 2BTPA | <a href="#">CYS134</a> (N)  | 4.20 | <a href="#">ARG138</a> (CA)  | 2BTPA |                                                                                                                 | N[ ] ... C[ ] |
| 2BTPA | <a href="#">CYS134</a> (N)  | 3.80 | <a href="#">ARG138</a> (CB)  | 2BTPA |                                                                                                                 | N[ ] ... C[ ] |
| 2BTPA | <a href="#">CYS134</a> (N)  | 4.32 | <a href="#">ARG138</a> (CG)  | 2BTPA |                                                                                                                 | N[ ] ... C[ ] |
| 2BTPA | <a href="#">CYS134</a> (N)  | 4.84 | <a href="#">ARG138</a> (CD)  | 2BTPA |                                                                                                                 |               |
| 2BTPA | <a href="#">CYS134</a> (CA) | 4.41 | <a href="#">ARG138</a> (N)   | 2BTPA |                                                                                                                 | C[ ] ... N[ ] |
| 2BTPA | <a href="#">CYS134</a> (CA) | 4.64 | <a href="#">ARG138</a> (CA)  | 2BTPA |                                                                                                                 |               |
| 2BTPA | <a href="#">CYS134</a> (CA) | 3.87 | <a href="#">ARG138</a> (CB)  | 2BTPA |                                                                                                                 | C[ ] ... C[ ] |
| 2BTPA | <a href="#">CYS134</a> (CA) | 4.51 | <a href="#">ARG138</a> (CG)  | 2BTPA |                                                                                                                 |               |
| 2BTPA | <a href="#">CYS134</a> (CA) | 4.65 | <a href="#">ARG138</a> (CD)  | 2BTPA |                                                                                                                 |               |
| 2BTPA | <a href="#">CYS134</a> (C)  | 3.71 | <a href="#">ARG138</a> (N)   | 2BTPA |                                                                                                                 | C[ ] ... N[ ] |
| 2BTPA | <a href="#">CYS134</a> (C)  | 4.27 | <a href="#">ARG138</a> (CA)  | 2BTPA |                                                                                                                 | C[ ] ... C[ ] |
| 2BTPA | <a href="#">CYS134</a> (C)  | 3.64 | <a href="#">ARG138</a> (CB)  | 2BTPA |                                                                                                                 | C[ ] ... C[ ] |
| 2BTPA | <a href="#">CYS134</a> (C)  | 4.74 | <a href="#">ARG138</a> (CG)  | 2BTPA |                                                                                                                 |               |
| 2BTPA | <a href="#">CYS134</a> (C)  | 5.00 | <a href="#">ARG138</a> (CD)  | 2BTPA |                                                                                                                 |               |

|       |                           |      |                            |       |                                                                                     |               |
|-------|---------------------------|------|----------------------------|-------|-------------------------------------------------------------------------------------|---------------|
| 2BTPA | <a href="#">CYS134(O)</a> | 2.72 | <a href="#">ARG138(N)</a>  | 2BTPA | <b>H-bond</b> [D-A-AA]:134.9° [A-D-DD]:116.6° d_planarity:-23.4° a_planarity:-69.1° | O[ ] ... N[ ] |
| 2BTPA | <a href="#">CYS134(O)</a> | 3.61 | <a href="#">ARG138(CA)</a> | 2BTPA |                                                                                     | O[ ] ... C[ ] |
| 2BTPA | <a href="#">CYS134(O)</a> | 4.88 | <a href="#">ARG138(C)</a>  | 2BTPA |                                                                                     |               |
| 2BTPA | <a href="#">CYS134(O)</a> | 3.43 | <a href="#">ARG138(CB)</a> | 2BTPA |                                                                                     | O[ ] ... C[ ] |
| 2BTPA | <a href="#">CYS134(O)</a> | 4.75 | <a href="#">ARG138(CG)</a> | 2BTPA |                                                                                     |               |

| chain1 | res1/atm1                 | distance | res2/atm2                  | chain2 | H-bonding                                                                                                       | Charge interaction |
|--------|---------------------------|----------|----------------------------|--------|-----------------------------------------------------------------------------------------------------------------|--------------------|
| 1Z7XW  | <a href="#">CYS37(SG)</a> | 4.62     | <a href="#">ILE9(CA)</a>   | 1Z7XW  |                                                                                                                 |                    |
| 1Z7XW  | <a href="#">CYS37(SG)</a> | 3.99     | <a href="#">ILE9(C)</a>    | 1Z7XW  |                                                                                                                 | S[ ] ... C[ ]      |
| 1Z7XW  | <a href="#">CYS37(SG)</a> | 3.69     | <a href="#">ILE9(O)</a>    | 1Z7XW  |                                                                                                                 | S[ ] ... O[ ]      |
| 1Z7XW  | <a href="#">CYS37(SG)</a> | 3.94     | <a href="#">ILE9(CB)</a>   | 1Z7XW  |                                                                                                                 | S[ ] ... C[ ]      |
| 1Z7XW  | <a href="#">CYS37(SG)</a> | 3.62     | <a href="#">ILE9(CG2)</a>  | 1Z7XW  |                                                                                                                 | S[ ] ... C[ ]      |
| 1Z7XW  | <a href="#">CYS37(SG)</a> | 4.47     | <a href="#">GLN10(N)</a>   | 1Z7XW  | [D-A-AA]:164.3° [A-D-DD]:84.9° d_planarity:51.0°, maximum distance exceeded, bad d_angle(sp2)                   | S[ ] ... N[ ]      |
| 1Z7XW  | <a href="#">CYS37(SG)</a> | 4.58     | <a href="#">GLN10(CA)</a>  | 1Z7XW  |                                                                                                                 |                    |
| 1Z7XW  | <a href="#">CYS37(SG)</a> | 4.71     | <a href="#">GLN10(C)</a>   | 1Z7XW  |                                                                                                                 |                    |
| 1Z7XW  | <a href="#">CYS37(N)</a>  | 4.74     | <a href="#">CYS11(N)</a>   | 1Z7XW  |                                                                                                                 |                    |
| 1Z7XW  | <a href="#">CYS37(SG)</a> | 4.40     | <a href="#">CYS11(N)</a>   | 1Z7XW  | [D-A-AA]:117.4° [A-D-DD]:121.1° d_planarity:-58.2°, maximum distance exceeded                                   | S[ ] ... N[ ]      |
| 1Z7XW  | <a href="#">CYS37(N)</a>  | 4.95     | <a href="#">GLU12(N)</a>   | 1Z7XW  |                                                                                                                 |                    |
| 1Z7XW  | <a href="#">CYS37(N)</a>  | 4.28     | <a href="#">GLU12(O)</a>   | 1Z7XW  | [D-A-AA]:143.5° [A-D-DD]:31.1° d_planarity:8.2° a_planarity:-46.5°, maximum distance exceeded, bad d_angle(sp2) | N[ ] ... O[ ]      |
| 1Z7XW  | <a href="#">CYS37(CA)</a> | 4.49     | <a href="#">GLU12(N)</a>   | 1Z7XW  |                                                                                                                 | C[ ] ... N[ ]      |
| 1Z7XW  | <a href="#">CYS37(CA)</a> | 5.00     | <a href="#">GLU12(CA)</a>  | 1Z7XW  |                                                                                                                 |                    |
| 1Z7XW  | <a href="#">CYS37(CA)</a> | 4.31     | <a href="#">GLU12(C)</a>   | 1Z7XW  |                                                                                                                 | C[ ] ... C[ ]      |
| 1Z7XW  | <a href="#">CYS37(CA)</a> | 3.12     | <a href="#">GLU12(O)</a>   | 1Z7XW  |                                                                                                                 | C[ ] ... O[ ]      |
| 1Z7XW  | <a href="#">CYS37(C)</a>  | 4.70     | <a href="#">GLU12(C)</a>   | 1Z7XW  |                                                                                                                 |                    |
| 1Z7XW  | <a href="#">CYS37(C)</a>  | 3.50     | <a href="#">GLU12(O)</a>   | 1Z7XW  |                                                                                                                 | C[ ] ... O[ ]      |
| 1Z7XW  | <a href="#">CYS37(O)</a>  | 4.60     | <a href="#">GLU12(C)</a>   | 1Z7XW  |                                                                                                                 |                    |
| 1Z7XW  | <a href="#">CYS37(O)</a>  | 3.43     | <a href="#">GLU12(O)</a>   | 1Z7XW  |                                                                                                                 | O[ ] ... O[ ]      |
| 1Z7XW  | <a href="#">CYS37(CB)</a> | 4.95     | <a href="#">GLU12(N)</a>   | 1Z7XW  |                                                                                                                 |                    |
| 1Z7XW  | <a href="#">CYS37(CB)</a> | 4.75     | <a href="#">GLU12(C)</a>   | 1Z7XW  |                                                                                                                 |                    |
| 1Z7XW  | <a href="#">CYS37(CB)</a> | 3.58     | <a href="#">GLU12(O)</a>   | 1Z7XW  |                                                                                                                 | C[ ] ... O[ ]      |
| 1Z7XW  | <a href="#">CYS37(SG)</a> | 4.36     | <a href="#">GLU12(N)</a>   | 1Z7XW  | [D-A-AA]:98.8° [A-D-DD]:102.8° d_planarity:-5.4°, maximum distance exceeded                                     | S[ ] ... N[ ]      |
| 1Z7XW  | <a href="#">CYS37(SG)</a> | 4.90     | <a href="#">GLU12(CA)</a>  | 1Z7XW  |                                                                                                                 |                    |
| 1Z7XW  | <a href="#">CYS37(SG)</a> | 4.85     | <a href="#">GLU12(C)</a>   | 1Z7XW  |                                                                                                                 |                    |
| 1Z7XW  | <a href="#">CYS37(SG)</a> | 3.97     | <a href="#">GLU12(O)</a>   | 1Z7XW  |                                                                                                                 | S[ ] ... O[ ]      |
| 1Z7XW  | <a href="#">CYS37(SG)</a> | 4.68     | <a href="#">GLU12(CB)</a>  | 1Z7XW  | Negative                                                                                                        |                    |
| 1Z7XW  | <a href="#">CYS37(C)</a>  | 4.81     | <a href="#">GLU13(CD)</a>  | 1Z7XW  |                                                                                                                 |                    |
| 1Z7XW  | <a href="#">CYS37(C)</a>  | 4.29     | <a href="#">GLU13(OE1)</a> | 1Z7XW  |                                                                                                                 | C[ ] ... O[-]      |
| 1Z7XW  | <a href="#">CYS37(C)</a>  | 4.84     | <a href="#">GLU13(OE2)</a> | 1Z7XW  |                                                                                                                 |                    |
| 1Z7XW  | <a href="#">CYS37(O)</a>  | 4.64     | <a href="#">GLU13(CA)</a>  | 1Z7XW  |                                                                                                                 |                    |
| 1Z7XW  | <a href="#">CYS37(O)</a>  | 4.99     | <a href="#">GLU13(C)</a>   | 1Z7XW  |                                                                                                                 |                    |
| 1Z7XW  | <a href="#">CYS37(O)</a>  | 4.45     | <a href="#">GLU13(CD)</a>  | 1Z7XW  |                                                                                                                 | O[ ] ... C[ ]      |
| 1Z7XW  | <a href="#">CYS37(O)</a>  | 4.21     | <a href="#">GLU13(OE1)</a> | 1Z7XW  |                                                                                                                 | O[ ] ... O[-]      |



|       |                           |      |                            |       |                                                                                                                        |               |
|-------|---------------------------|------|----------------------------|-------|------------------------------------------------------------------------------------------------------------------------|---------------|
| 1Z7XW | <a href="#">CYS37(O)</a>  | 4.42 | <a href="#">GLU13(OE2)</a> | 1Z7XW |                                                                                                                        | O[ ] ... O[-] |
| 1Z7XW | <a href="#">CYS37(CA)</a> | 4.89 | <a href="#">LEU14(CD1)</a> | 1Z7XW |                                                                                                                        |               |
| 1Z7XW | <a href="#">CYS37(C)</a>  | 4.98 | <a href="#">LEU14(CD1)</a> | 1Z7XW |                                                                                                                        |               |
| 1Z7XW | <a href="#">CYS37(O)</a>  | 4.29 | <a href="#">LEU14(N)</a>   | 1Z7XW | [D-A-AA]:137.3° [A-D-DD]:115.1° d_planarity:-34.6°<br>a_planarity:-60.3°, maximum distance exceeded                    | O[ ] ... N[ ] |
| 1Z7XW | <a href="#">CYS37(O)</a>  | 4.50 | <a href="#">LEU14(CB)</a>  | 1Z7XW |                                                                                                                        |               |
| 1Z7XW | <a href="#">CYS37(O)</a>  | 4.26 | <a href="#">LEU14(CG)</a>  | 1Z7XW |                                                                                                                        | O[ ] ... C[ ] |
| 1Z7XW | <a href="#">CYS37(O)</a>  | 4.19 | <a href="#">LEU14(CD1)</a> | 1Z7XW |                                                                                                                        | O[ ] ... C[ ] |
| 1Z7XW | <a href="#">CYS37(CB)</a> | 4.24 | <a href="#">LEU14(CG)</a>  | 1Z7XW |                                                                                                                        | C[ ] ... C[ ] |
| 1Z7XW | <a href="#">CYS37(CB)</a> | 3.73 | <a href="#">LEU14(CD1)</a> | 1Z7XW |                                                                                                                        | C[ ] ... C[ ] |
| 1Z7XW | <a href="#">CYS37(SG)</a> | 4.63 | <a href="#">LEU14(CG)</a>  | 1Z7XW |                                                                                                                        |               |
| 1Z7XW | <a href="#">CYS37(SG)</a> | 4.21 | <a href="#">LEU14(CD1)</a> | 1Z7XW |                                                                                                                        | S[ ] ... C[ ] |
| 1Z7XW | <a href="#">CYS37(N)</a>  | 4.74 | <a href="#">LEU34(C)</a>   | 1Z7XW |                                                                                                                        |               |
| 1Z7XW | <a href="#">CYS37(N)</a>  | 4.70 | <a href="#">LEU34(O)</a>   | 1Z7XW | [D-A-AA]:84.2° [A-D-DD]:111.9° d_planarity:-40.3°<br>a_planarity:57.9°, maximum distance exceeded,<br>bad a_angle(sp2) |               |
| 1Z7XW | <a href="#">CYS37(CB)</a> | 4.85 | <a href="#">LEU34(CA)</a>  | 1Z7XW |                                                                                                                        |               |
| 1Z7XW | <a href="#">CYS37(CB)</a> | 4.56 | <a href="#">LEU34(C)</a>   | 1Z7XW |                                                                                                                        |               |
| 1Z7XW | <a href="#">CYS37(CB)</a> | 4.80 | <a href="#">LEU34(O)</a>   | 1Z7XW |                                                                                                                        |               |
| 1Z7XW | <a href="#">CYS37(CB)</a> | 4.69 | <a href="#">LEU34(CB)</a>  | 1Z7XW |                                                                                                                        |               |
| 1Z7XW | <a href="#">CYS37(SG)</a> | 4.06 | <a href="#">LEU34(CA)</a>  | 1Z7XW |                                                                                                                        | S[ ] ... C[ ] |
| 1Z7XW | <a href="#">CYS37(SG)</a> | 3.94 | <a href="#">LEU34(C)</a>   | 1Z7XW |                                                                                                                        | S[ ] ... C[ ] |
| 1Z7XW | <a href="#">CYS37(SG)</a> | 4.61 | <a href="#">LEU34(O)</a>   | 1Z7XW |                                                                                                                        |               |
| 1Z7XW | <a href="#">CYS37(SG)</a> | 4.36 | <a href="#">LEU34(CB)</a>  | 1Z7XW |                                                                                                                        | S[ ] ... C[ ] |
| 1Z7XW | <a href="#">CYS37(SG)</a> | 4.68 | <a href="#">LEU34(CD2)</a> | 1Z7XW |                                                                                                                        |               |
| 1Z7XW | <a href="#">CYS37(N)</a>  | 4.58 | <a href="#">ASP35(N)</a>   | 1Z7XW |                                                                                                                        |               |
| 1Z7XW | <a href="#">CYS37(N)</a>  | 4.45 | <a href="#">ASP35(CA)</a>  | 1Z7XW |                                                                                                                        | N[ ] ... C[ ] |
| 1Z7XW | <a href="#">CYS37(N)</a>  | 3.29 | <a href="#">ASP35(C)</a>   | 1Z7XW |                                                                                                                        | N[ ] ... C[ ] |
| 1Z7XW | <a href="#">CYS37(N)</a>  | 3.31 | <a href="#">ASP35(O)</a>   | 1Z7XW | [D-A-AA]:78.4° [A-D-DD]:119.6° d_planarity:65.8°<br>a_planarity:46.7°, bad a_angle(sp2), bad d_planarity               | N[ ] ... O[ ] |
| 1Z7XW | <a href="#">CYS37(CA)</a> | 4.46 | <a href="#">ASP35(C)</a>   | 1Z7XW |                                                                                                                        | C[ ] ... C[ ] |
| 1Z7XW | <a href="#">CYS37(CA)</a> | 4.22 | <a href="#">ASP35(O)</a>   | 1Z7XW |                                                                                                                        | C[ ] ... O[ ] |
| 1Z7XW | <a href="#">CYS37(CB)</a> | 4.77 | <a href="#">ASP35(N)</a>   | 1Z7XW |                                                                                                                        |               |
| 1Z7XW | <a href="#">CYS37(CB)</a> | 4.66 | <a href="#">ASP35(C)</a>   | 1Z7XW |                                                                                                                        |               |
| 1Z7XW | <a href="#">CYS37(CB)</a> | 4.44 | <a href="#">ASP35(O)</a>   | 1Z7XW |                                                                                                                        | C[ ] ... O[ ] |
| 1Z7XW | <a href="#">CYS37(SG)</a> | 3.84 | <a href="#">ASP35(N)</a>   | 1Z7XW | [D-A-AA]:111.0° [A-D-DD]:113.7° d_planarity:-79.4°,<br>bad d_planarity                                                 | S[ ] ... N[ ] |
| 1Z7XW | <a href="#">CYS37(SG)</a> | 4.63 | <a href="#">ASP35(CA)</a>  | 1Z7XW |                                                                                                                        |               |
| 1Z7XW | <a href="#">CYS37(SG)</a> | 4.09 | <a href="#">ASP35(C)</a>   | 1Z7XW |                                                                                                                        | S[ ] ... C[ ] |
| 1Z7XW | <a href="#">CYS37(SG)</a> | 3.58 | <a href="#">ASP35(O)</a>   | 1Z7XW |                                                                                                                        | S[ ] ... O[ ] |
| 1Z7XW | <a href="#">CYS37(N)</a>  | 2.87 | <a href="#">ASP36(N)</a>   | 1Z7XW |                                                                                                                        | N[ ] ... N[ ] |
| 1Z7XW | <a href="#">CYS37(N)</a>  | 2.46 | <a href="#">ASP36(CA)</a>  | 1Z7XW |                                                                                                                        | N[ ] ... C[ ] |
| 1Z7XW | <a href="#">CYS37(N)</a>  | 2.24 | <a href="#">ASP36(O)</a>   | 1Z7XW | [D-A-AA]:30.1° [A-D-DD]:95.3° d_planarity:3.3°<br>a_planarity:4.7°, bad a_angle(sp2)                                   | N[ ] ... O[ ] |
| 1Z7XW | <a href="#">CYS37(N)</a>  | 3.79 | <a href="#">ASP36(CB)</a>  | 1Z7XW |                                                                                                                        | N[ ] ... C[ ] |
| 1Z7XW | <a href="#">CYS37(N)</a>  | 4.43 | <a href="#">ASP36(CG)</a>  | 1Z7XW |                                                                                                                        | N[ ] ... C[ ] |
| 1Z7XW | <a href="#">CYS37(N)</a>  | 4.35 | <a href="#">ASP36(OD1)</a> | 1Z7XW | [D-A-AA]:85.7° [A-D-DD]:125.3° d_planarity:40.0°<br>a_planarity:36.1°, maximum distance exceeded,<br>bad a_angle(sp2)  | N[ ] ... O[-] |
| 1Z7XW | <a href="#">CYS37(CA)</a> | 4.27 | <a href="#">ASP36(N)</a>   | 1Z7XW |                                                                                                                        | C[ ] ... N[ ] |
| 1Z7XW | <a href="#">CYS37(CA)</a> | 3.84 | <a href="#">ASP36(CA)</a>  | 1Z7XW |                                                                                                                        | C[ ] ... C[ ] |

|       |                            |      |                             |       |                                                                                                                         |               |
|-------|----------------------------|------|-----------------------------|-------|-------------------------------------------------------------------------------------------------------------------------|---------------|
| 1Z7XW | <a href="#">CYS37</a> (CA) | 2.45 | <a href="#">ASP36</a> (C)   | 1Z7XW |                                                                                                                         | C[ ] ... C[ ] |
| 1Z7XW | <a href="#">CYS37</a> (CA) | 2.79 | <a href="#">ASP36</a> (O)   | 1Z7XW |                                                                                                                         | C[ ] ... O[ ] |
| 1Z7XW | <a href="#">CYS37</a> (C)  | 4.75 | <a href="#">ASP36</a> (CA)  | 1Z7XW |                                                                                                                         |               |
| 1Z7XW | <a href="#">CYS37</a> (C)  | 3.49 | <a href="#">ASP36</a> (C)   | 1Z7XW |                                                                                                                         | C[ ] ... C[ ] |
| 1Z7XW | <a href="#">CYS37</a> (C)  | 3.83 | <a href="#">ASP36</a> (O)   | 1Z7XW |                                                                                                                         | C[ ] ... O[ ] |
| 1Z7XW | <a href="#">CYS37</a> (O)  | 4.63 | <a href="#">ASP36</a> (C)   | 1Z7XW |                                                                                                                         |               |
| 1Z7XW | <a href="#">CYS37</a> (O)  | 4.84 | <a href="#">ASP36</a> (O)   | 1Z7XW |                                                                                                                         |               |
| 1Z7XW | <a href="#">CYS37</a> (CB) | 4.79 | <a href="#">ASP36</a> (N)   | 1Z7XW |                                                                                                                         |               |
| 1Z7XW | <a href="#">CYS37</a> (CB) | 4.80 | <a href="#">ASP36</a> (CA)  | 1Z7XW |                                                                                                                         |               |
| 1Z7XW | <a href="#">CYS37</a> (CB) | 3.56 | <a href="#">ASP36</a> (C)   | 1Z7XW |                                                                                                                         | C[ ] ... C[ ] |
| 1Z7XW | <a href="#">CYS37</a> (CB) | 3.95 | <a href="#">ASP36</a> (O)   | 1Z7XW |                                                                                                                         | C[ ] ... O[ ] |
| 1Z7XW | <a href="#">CYS37</a> (SG) | 4.70 | <a href="#">ASP36</a> (N)   | 1Z7XW | [D-A-AA]:82.1° [A-D-DD]:91.7° d_planarity:49.8°, <b>maximum distance exceeded</b>                                       |               |
| 1Z7XW | <a href="#">CYS37</a> (SG) | 4.97 | <a href="#">ASP36</a> (CA)  | 1Z7XW |                                                                                                                         |               |
| 1Z7XW | <a href="#">CYS37</a> (SG) | 3.87 | <a href="#">ASP36</a> (C)   | 1Z7XW |                                                                                                                         | S[ ] ... C[ ] |
| 1Z7XW | <a href="#">CYS37</a> (SG) | 4.05 | <a href="#">ASP36</a> (O)   | 1Z7XW |                                                                                                                         | S[ ] ... O[ ] |
| 1Z7XW | <a href="#">CYS37</a> (N)  | 2.76 | <a href="#">GLY38</a> (N)   | 1Z7XW |                                                                                                                         | N[ ] ... N[ ] |
| 1Z7XW | <a href="#">CYS37</a> (N)  | 4.20 | <a href="#">GLY38</a> (CA)  | 1Z7XW |                                                                                                                         | N[ ] ... C[ ] |
| 1Z7XW | <a href="#">CYS37</a> (N)  | 4.97 | <a href="#">GLY38</a> (C)   | 1Z7XW |                                                                                                                         |               |
| 1Z7XW | <a href="#">CYS37</a> (CA) | 2.44 | <a href="#">GLY38</a> (N)   | 1Z7XW |                                                                                                                         | C[ ] ... N[ ] |
| 1Z7XW | <a href="#">CYS37</a> (CA) | 3.81 | <a href="#">GLY38</a> (CA)  | 1Z7XW |                                                                                                                         | C[ ] ... C[ ] |
| 1Z7XW | <a href="#">CYS37</a> (CA) | 4.51 | <a href="#">GLY38</a> (C)   | 1Z7XW |                                                                                                                         |               |
| 1Z7XW | <a href="#">CYS37</a> (C)  | 2.44 | <a href="#">GLY38</a> (CA)  | 1Z7XW |                                                                                                                         | C[ ] ... C[ ] |
| 1Z7XW | <a href="#">CYS37</a> (C)  | 3.10 | <a href="#">GLY38</a> (C)   | 1Z7XW |                                                                                                                         | C[ ] ... C[ ] |
| 1Z7XW | <a href="#">CYS37</a> (C)  | 4.02 | <a href="#">GLY38</a> (O)   | 1Z7XW |                                                                                                                         | C[ ] ... O[ ] |
| 1Z7XW | <a href="#">CYS37</a> (O)  | 2.26 | <a href="#">GLY38</a> (N)   | 1Z7XW | [D-A-AA]:29.4° [A-D-DD]:95.1° d_planarity:2.1° a_planarity:0.0°, <b>bad a_angle(sp2)</b>                                | O[ ] ... N[ ] |
| 1Z7XW | <a href="#">CYS37</a> (O)  | 2.80 | <a href="#">GLY38</a> (CA)  | 1Z7XW |                                                                                                                         | O[ ] ... C[ ] |
| 1Z7XW | <a href="#">CYS37</a> (O)  | 3.09 | <a href="#">GLY38</a> (C)   | 1Z7XW |                                                                                                                         | O[ ] ... C[ ] |
| 1Z7XW | <a href="#">CYS37</a> (O)  | 3.69 | <a href="#">GLY38</a> (O)   | 1Z7XW |                                                                                                                         | O[ ] ... O[ ] |
| 1Z7XW | <a href="#">CYS37</a> (CB) | 3.59 | <a href="#">GLY38</a> (N)   | 1Z7XW |                                                                                                                         | C[ ] ... N[ ] |
| 1Z7XW | <a href="#">CYS37</a> (CB) | 4.82 | <a href="#">GLY38</a> (CA)  | 1Z7XW |                                                                                                                         |               |
| 1Z7XW | <a href="#">CYS37</a> (N)  | 4.71 | <a href="#">LEU39</a> (N)   | 1Z7XW |                                                                                                                         |               |
| 1Z7XW | <a href="#">CYS37</a> (CA) | 4.45 | <a href="#">LEU39</a> (N)   | 1Z7XW |                                                                                                                         | C[ ] ... N[ ] |
| 1Z7XW | <a href="#">CYS37</a> (C)  | 3.30 | <a href="#">LEU39</a> (N)   | 1Z7XW |                                                                                                                         | C[ ] ... N[ ] |
| 1Z7XW | <a href="#">CYS37</a> (C)  | 4.56 | <a href="#">LEU39</a> (CA)  | 1Z7XW |                                                                                                                         |               |
| 1Z7XW | <a href="#">CYS37</a> (C)  | 4.61 | <a href="#">LEU39</a> (CG)  | 1Z7XW |                                                                                                                         |               |
| 1Z7XW | <a href="#">CYS37</a> (C)  | 4.87 | <a href="#">LEU39</a> (CD2) | 1Z7XW |                                                                                                                         |               |
| 1Z7XW | <a href="#">CYS37</a> (O)  | 3.45 | <a href="#">LEU39</a> (N)   | 1Z7XW | [D-A-AA]:72.4° [A-D-DD]:127.3° d_planarity:77.4° a_planarity:44.5°, <b>bad a_angle(sp2), bad d_planarity</b>            | O[ ] ... N[ ] |
| 1Z7XW | <a href="#">CYS37</a> (O)  | 4.49 | <a href="#">LEU39</a> (CA)  | 1Z7XW |                                                                                                                         | O[ ] ... C[ ] |
| 1Z7XW | <a href="#">CYS37</a> (O)  | 4.60 | <a href="#">LEU39</a> (CG)  | 1Z7XW |                                                                                                                         |               |
| 1Z7XW | <a href="#">CYS37</a> (O)  | 4.48 | <a href="#">LEU39</a> (CD2) | 1Z7XW |                                                                                                                         | O[ ] ... C[ ] |
| 1Z7XW | <a href="#">CYS37</a> (CB) | 4.82 | <a href="#">LEU39</a> (N)   | 1Z7XW |                                                                                                                         |               |
| 1Z7XW | <a href="#">CYS37</a> (CB) | 4.49 | <a href="#">LEU39</a> (CG)  | 1Z7XW |                                                                                                                         | C[ ] ... C[ ] |
| 1Z7XW | <a href="#">CYS37</a> (CB) | 4.59 | <a href="#">LEU39</a> (CD2) | 1Z7XW |                                                                                                                         |               |
| 1Z7XW | <a href="#">CYS37</a> (N)  | 4.57 | <a href="#">SER64</a> (O)   | 1Z7XW | [D-A-AA]:126.9° [A-D-DD]:152.0° d_planarity:-75.7° a_planarity:63.2°, <b>maximum distance exceeded, bad d_planarity</b> |               |
| 1Z7XW | <a href="#">CYS37</a> (N)  | 3.94 | <a href="#">ASN65</a> (CG)  | 1Z7XW |                                                                                                                         | N[ ] ... C[ ] |
| 1Z7XW | <a href="#">CYS37</a> (N)  | 3.02 | <a href="#">ASN65</a> (OD1) | 1Z7XW | <b>H-bond</b> [D-A-AA]:130.6° [A-D-DD]:105.6° d_planarity:-26.7°                                                        | N[ ] ... O[ ] |

|       |                           |      |                            |       |                    |               |
|-------|---------------------------|------|----------------------------|-------|--------------------|---------------|
|       |                           |      |                            |       | a_planarity:-35.9° |               |
| 1Z7XW | <a href="#">CYS37(N)</a>  | 4.22 | <a href="#">ASN65(ND2)</a> | 1Z7XW |                    | N[ ] ... N[ ] |
| 1Z7XW | <a href="#">CYS37(CA)</a> | 4.79 | <a href="#">ASN65(CG)</a>  | 1Z7XW |                    |               |
| 1Z7XW | <a href="#">CYS37(CA)</a> | 3.70 | <a href="#">ASN65(OD1)</a> | 1Z7XW |                    | C[ ] ... O[ ] |
| 1Z7XW | <a href="#">CYS37(C)</a>  | 4.83 | <a href="#">ASN65(CG)</a>  | 1Z7XW |                    |               |
| 1Z7XW | <a href="#">CYS37(C)</a>  | 3.60 | <a href="#">ASN65(OD1)</a> | 1Z7XW |                    | C[ ] ... O[ ] |
| 1Z7XW | <a href="#">CYS37(O)</a>  | 4.49 | <a href="#">ASN65(OD1)</a> | 1Z7XW |                    | O[ ] ... O[ ] |
| 1Z7XW | <a href="#">CYS37(CB)</a> | 4.10 | <a href="#">ASN65(OD1)</a> | 1Z7XW |                    | C[ ] ... O[ ] |

| chain1 | res1/atm1                  | distance | res2/atm2                  | chain2 | H-bonding                                                                                                                              | Charge interaction |
|--------|----------------------------|----------|----------------------------|--------|----------------------------------------------------------------------------------------------------------------------------------------|--------------------|
| 1Z7XW  | <a href="#">CYS247(N)</a>  | 4.95     | <a href="#">GLY242(O)</a>  | 1Z7XW  | [D-A-AA]:134.8° [A-D-DD]:153.2° d_planarity:-21.8°<br>a_planarity:11.3°, maximum distance exceeded                                     |                    |
| 1Z7XW  | <a href="#">CYS247(N)</a>  | 4.97     | <a href="#">MET243(CA)</a> | 1Z7XW  |                                                                                                                                        |                    |
| 1Z7XW  | <a href="#">CYS247(N)</a>  | 4.10     | <a href="#">MET243(C)</a>  | 1Z7XW  |                                                                                                                                        | N[ ] ... C[ ]      |
| 1Z7XW  | <a href="#">CYS247(N)</a>  | 2.91     | <a href="#">MET243(O)</a>  | 1Z7XW  | <b>H-bond</b> [D-A-AA]:158.0° [A-D-DD]:110.3° d_planarity:-13.5° a_planarity:-80.3°                                                    | N[ ] ... O[ ]      |
| 1Z7XW  | <a href="#">CYS247(CA)</a> | 4.93     | <a href="#">MET243(C)</a>  | 1Z7XW  |                                                                                                                                        |                    |
| 1Z7XW  | <a href="#">CYS247(CA)</a> | 3.68     | <a href="#">MET243(O)</a>  | 1Z7XW  |                                                                                                                                        | C[ ] ... O[ ]      |
| 1Z7XW  | <a href="#">CYS247(C)</a>  | 4.94     | <a href="#">MET243(O)</a>  | 1Z7XW  |                                                                                                                                        |                    |
| 1Z7XW  | <a href="#">CYS247(CB)</a> | 4.43     | <a href="#">MET243(C)</a>  | 1Z7XW  |                                                                                                                                        | C[ ] ... C[ ]      |
| 1Z7XW  | <a href="#">CYS247(CB)</a> | 3.27     | <a href="#">MET243(O)</a>  | 1Z7XW  |                                                                                                                                        | C[ ] ... O[ ]      |
| 1Z7XW  | <a href="#">CYS247(SG)</a> | 4.69     | <a href="#">MET243(CA)</a> | 1Z7XW  |                                                                                                                                        |                    |
| 1Z7XW  | <a href="#">CYS247(SG)</a> | 4.18     | <a href="#">MET243(C)</a>  | 1Z7XW  |                                                                                                                                        | S[ ] ... C[ ]      |
| 1Z7XW  | <a href="#">CYS247(SG)</a> | 3.23     | <a href="#">MET243(O)</a>  | 1Z7XW  |                                                                                                                                        | S[ ] ... O[ ]      |
| 1Z7XW  | <a href="#">CYS247(SG)</a> | 4.72     | <a href="#">MET243(CB)</a> | 1Z7XW  |                                                                                                                                        |                    |
| 1Z7XW  | <a href="#">CYS247(SG)</a> | 3.80     | <a href="#">MET243(CE)</a> | 1Z7XW  |                                                                                                                                        | S[ ] ... C[ ]      |
| 1Z7XW  | <a href="#">CYS247(N)</a>  | 4.96     | <a href="#">ALA244(N)</a>  | 1Z7XW  |                                                                                                                                        |                    |
| 1Z7XW  | <a href="#">CYS247(N)</a>  | 4.91     | <a href="#">ALA244(CA)</a> | 1Z7XW  |                                                                                                                                        |                    |
| 1Z7XW  | <a href="#">CYS247(N)</a>  | 4.29     | <a href="#">ALA244(C)</a>  | 1Z7XW  |                                                                                                                                        | N[ ] ... C[ ]      |
| 1Z7XW  | <a href="#">CYS247(N)</a>  | 4.26     | <a href="#">ALA244(O)</a>  | 1Z7XW  | [D-A-AA]:83.5° [A-D-DD]:106.6° d_planarity:-49.0°<br>a_planarity:79.3°, maximum distance exceeded,<br>bad a_angle(sp2)                 | N[ ] ... O[ ]      |
| 1Z7XW  | <a href="#">CYS247(CA)</a> | 4.88     | <a href="#">ALA244(O)</a>  | 1Z7XW  |                                                                                                                                        |                    |
| 1Z7XW  | <a href="#">CYS247(CB)</a> | 5.00     | <a href="#">ALA244(CA)</a> | 1Z7XW  |                                                                                                                                        |                    |
| 1Z7XW  | <a href="#">CYS247(CB)</a> | 4.98     | <a href="#">ALA244(C)</a>  | 1Z7XW  |                                                                                                                                        |                    |
| 1Z7XW  | <a href="#">CYS247(CB)</a> | 4.80     | <a href="#">ALA244(O)</a>  | 1Z7XW  |                                                                                                                                        |                    |
| 1Z7XW  | <a href="#">CYS247(N)</a>  | 4.38     | <a href="#">GLU245(N)</a>  | 1Z7XW  |                                                                                                                                        | N[ ] ... N[ ]      |
| 1Z7XW  | <a href="#">CYS247(N)</a>  | 4.55     | <a href="#">GLU245(CA)</a> | 1Z7XW  |                                                                                                                                        |                    |
| 1Z7XW  | <a href="#">CYS247(N)</a>  | 3.57     | <a href="#">GLU245(C)</a>  | 1Z7XW  |                                                                                                                                        | N[ ] ... C[ ]      |
| 1Z7XW  | <a href="#">CYS247(N)</a>  | 4.01     | <a href="#">GLU245(O)</a>  | 1Z7XW  | [D-A-AA]:60.7° [A-D-DD]:137.3° d_planarity:67.3°<br>a_planarity:42.3°, maximum distance exceeded,<br>bad a_angle(sp2), bad d_planarity | N[ ] ... O[ ]      |
| 1Z7XW  | <a href="#">CYS247(CA)</a> | 4.87     | <a href="#">GLU245(C)</a>  | 1Z7XW  |                                                                                                                                        |                    |
| 1Z7XW  | <a href="#">CYS247(N)</a>  | 2.76     | <a href="#">LEU246(N)</a>  | 1Z7XW  |                                                                                                                                        | N[ ] ... N[ ]      |
| 1Z7XW  | <a href="#">CYS247(N)</a>  | 2.39     | <a href="#">LEU246(CA)</a> | 1Z7XW  |                                                                                                                                        | N[ ] ... C[ ]      |
| 1Z7XW  | <a href="#">CYS247(N)</a>  | 2.27     | <a href="#">LEU246(O)</a>  | 1Z7XW  | [D-A-AA]:29.0° [A-D-DD]:95.9° d_planarity:4.6°<br>a_planarity:2.2°, bad a_angle(sp2)                                                   | N[ ] ... O[ ]      |
| 1Z7XW  | <a href="#">CYS247(N)</a>  | 3.07     | <a href="#">LEU246(CB)</a> | 1Z7XW  |                                                                                                                                        | N[ ] ... C[ ]      |

|       |                            |      |                             |       |  |               |
|-------|----------------------------|------|-----------------------------|-------|--|---------------|
| 1Z7XW | <a href="#">CYS247(N)</a>  | 4.00 | <a href="#">LEU246(CG)</a>  | 1Z7XW |  | N[ ] ... C[ ] |
| 1Z7XW | <a href="#">CYS247(N)</a>  | 4.92 | <a href="#">LEU246(CD1)</a> | 1Z7XW |  |               |
| 1Z7XW | <a href="#">CYS247(CA)</a> | 4.20 | <a href="#">LEU246(N)</a>   | 1Z7XW |  | C[ ] ... N[ ] |
| 1Z7XW | <a href="#">CYS247(CA)</a> | 3.78 | <a href="#">LEU246(CA)</a>  | 1Z7XW |  | C[ ] ... C[ ] |
| 1Z7XW | <a href="#">CYS247(CA)</a> | 2.45 | <a href="#">LEU246(C)</a>   | 1Z7XW |  | C[ ] ... C[ ] |
| 1Z7XW | <a href="#">CYS247(CA)</a> | 2.83 | <a href="#">LEU246(O)</a>   | 1Z7XW |  | C[ ] ... O[ ] |
| 1Z7XW | <a href="#">CYS247(CA)</a> | 4.34 | <a href="#">LEU246(CB)</a>  | 1Z7XW |  | C[ ] ... C[ ] |
| 1Z7XW | <a href="#">CYS247(C)</a>  | 4.88 | <a href="#">LEU246(N)</a>   | 1Z7XW |  |               |
| 1Z7XW | <a href="#">CYS247(C)</a>  | 4.51 | <a href="#">LEU246(CA)</a>  | 1Z7XW |  |               |
| 1Z7XW | <a href="#">CYS247(C)</a>  | 3.08 | <a href="#">LEU246(C)</a>   | 1Z7XW |  | C[ ] ... C[ ] |
| 1Z7XW | <a href="#">CYS247(C)</a>  | 2.97 | <a href="#">LEU246(O)</a>   | 1Z7XW |  | C[ ] ... O[ ] |
| 1Z7XW | <a href="#">CYS247(O)</a>  | 4.02 | <a href="#">LEU246(C)</a>   | 1Z7XW |  | O[ ] ... C[ ] |
| 1Z7XW | <a href="#">CYS247(O)</a>  | 3.63 | <a href="#">LEU246(O)</a>   | 1Z7XW |  | O[ ] ... O[ ] |
| 1Z7XW | <a href="#">CYS247(CB)</a> | 4.94 | <a href="#">LEU246(N)</a>   | 1Z7XW |  |               |
| 1Z7XW | <a href="#">CYS247(CB)</a> | 4.83 | <a href="#">LEU246(CA)</a>  | 1Z7XW |  |               |
| 1Z7XW | <a href="#">CYS247(CB)</a> | 3.75 | <a href="#">LEU246(C)</a>   | 1Z7XW |  | C[ ] ... C[ ] |
| 1Z7XW | <a href="#">CYS247(CB)</a> | 4.34 | <a href="#">LEU246(O)</a>   | 1Z7XW |  | C[ ] ... O[ ] |
| 1Z7XW | <a href="#">CYS247(SG)</a> | 4.47 | <a href="#">LEU246(C)</a>   | 1Z7XW |  | S[ ] ... C[ ] |
| 1Z7XW | <a href="#">CYS247(N)</a>  | 2.88 | <a href="#">PRO248(N)</a>   | 1Z7XW |  | N[ ] ... N[ ] |
| 1Z7XW | <a href="#">CYS247(N)</a>  | 4.26 | <a href="#">PRO248(CA)</a>  | 1Z7XW |  | N[ ] ... C[ ] |
| 1Z7XW | <a href="#">CYS247(N)</a>  | 4.80 | <a href="#">PRO248(C)</a>   | 1Z7XW |  |               |
| 1Z7XW | <a href="#">CYS247(N)</a>  | 4.90 | <a href="#">PRO248(CB)</a>  | 1Z7XW |  |               |
| 1Z7XW | <a href="#">CYS247(N)</a>  | 4.49 | <a href="#">PRO248(CG)</a>  | 1Z7XW |  | N[ ] ... C[ ] |
| 1Z7XW | <a href="#">CYS247(N)</a>  | 2.97 | <a href="#">PRO248(CD)</a>  | 1Z7XW |  | N[ ] ... C[ ] |
| 1Z7XW | <a href="#">CYS247(CA)</a> | 2.51 | <a href="#">PRO248(N)</a>   | 1Z7XW |  | C[ ] ... N[ ] |
| 1Z7XW | <a href="#">CYS247(CA)</a> | 3.81 | <a href="#">PRO248(CA)</a>  | 1Z7XW |  | C[ ] ... C[ ] |
| 1Z7XW | <a href="#">CYS247(CA)</a> | 4.34 | <a href="#">PRO248(C)</a>   | 1Z7XW |  | C[ ] ... C[ ] |
| 1Z7XW | <a href="#">CYS247(CA)</a> | 4.83 | <a href="#">PRO248(CB)</a>  | 1Z7XW |  |               |
| 1Z7XW | <a href="#">CYS247(CA)</a> | 4.56 | <a href="#">PRO248(CG)</a>  | 1Z7XW |  |               |
| 1Z7XW | <a href="#">CYS247(CA)</a> | 3.18 | <a href="#">PRO248(CD)</a>  | 1Z7XW |  | C[ ] ... C[ ] |
| 1Z7XW | <a href="#">CYS247(C)</a>  | 2.37 | <a href="#">PRO248(CA)</a>  | 1Z7XW |  | C[ ] ... C[ ] |
| 1Z7XW | <a href="#">CYS247(C)</a>  | 2.92 | <a href="#">PRO248(C)</a>   | 1Z7XW |  | C[ ] ... C[ ] |
| 1Z7XW | <a href="#">CYS247(C)</a>  | 3.74 | <a href="#">PRO248(O)</a>   | 1Z7XW |  | C[ ] ... O[ ] |
| 1Z7XW | <a href="#">CYS247(C)</a>  | 3.61 | <a href="#">PRO248(CB)</a>  | 1Z7XW |  | C[ ] ... C[ ] |
| 1Z7XW | <a href="#">CYS247(C)</a>  | 3.65 | <a href="#">PRO248(CG)</a>  | 1Z7XW |  | C[ ] ... C[ ] |
| 1Z7XW | <a href="#">CYS247(C)</a>  | 2.61 | <a href="#">PRO248(CD)</a>  | 1Z7XW |  | C[ ] ... C[ ] |
| 1Z7XW | <a href="#">CYS247(O)</a>  | 2.26 | <a href="#">PRO248(N)</a>   | 1Z7XW |  | O[ ] ... N[ ] |
| 1Z7XW | <a href="#">CYS247(O)</a>  | 2.63 | <a href="#">PRO248(CA)</a>  | 1Z7XW |  | O[ ] ... C[ ] |
| 1Z7XW | <a href="#">CYS247(O)</a>  | 2.75 | <a href="#">PRO248(C)</a>   | 1Z7XW |  | O[ ] ... C[ ] |
| 1Z7XW | <a href="#">CYS247(O)</a>  | 3.19 | <a href="#">PRO248(O)</a>   | 1Z7XW |  | O[ ] ... O[ ] |
| 1Z7XW | <a href="#">CYS247(O)</a>  | 4.11 | <a href="#">PRO248(CB)</a>  | 1Z7XW |  | O[ ] ... C[ ] |
| 1Z7XW | <a href="#">CYS247(O)</a>  | 4.45 | <a href="#">PRO248(CG)</a>  | 1Z7XW |  | O[ ] ... C[ ] |
| 1Z7XW | <a href="#">CYS247(O)</a>  | 3.68 | <a href="#">PRO248(CD)</a>  | 1Z7XW |  | O[ ] ... C[ ] |
| 1Z7XW | <a href="#">CYS247(CB)</a> | 3.46 | <a href="#">PRO248(N)</a>   | 1Z7XW |  | C[ ] ... N[ ] |
| 1Z7XW | <a href="#">CYS247(CB)</a> | 4.76 | <a href="#">PRO248(CA)</a>  | 1Z7XW |  |               |
| 1Z7XW | <a href="#">CYS247(CB)</a> | 3.88 | <a href="#">PRO248(CD)</a>  | 1Z7XW |  | C[ ] ... C[ ] |
| 1Z7XW | <a href="#">CYS247(N)</a>  | 4.46 | <a href="#">GLY249(N)</a>   | 1Z7XW |  | N[ ] ... N[ ] |
| 1Z7XW | <a href="#">CYS247(CA)</a> | 4.31 | <a href="#">GLY249(N)</a>   | 1Z7XW |  | C[ ] ... N[ ] |
| 1Z7XW | <a href="#">CYS247(C)</a>  | 3.21 | <a href="#">GLY249(N)</a>   | 1Z7XW |  | C[ ] ... N[ ] |

|       |                             |      |                              |       |                                                                                                          |               |
|-------|-----------------------------|------|------------------------------|-------|----------------------------------------------------------------------------------------------------------|---------------|
| 1Z7XW | <a href="#">CYS247</a> (C)  | 4.43 | <a href="#">GLY249</a> (CA)  | 1Z7XW |                                                                                                          | C[ ] ... C[ ] |
| 1Z7XW | <a href="#">CYS247</a> (C)  | 4.56 | <a href="#">GLY249</a> (C)   | 1Z7XW |                                                                                                          |               |
| 1Z7XW | <a href="#">CYS247</a> (O)  | 3.24 | <a href="#">GLY249</a> (N)   | 1Z7XW | [D-A-AA]:77.8° [A-D-DD]:122.0° d_planarity:68.7°<br>a_planarity:54.2°, bad a_angle(sp2), bad d_planarity | O[ ] ... N[ ] |
| 1Z7XW | <a href="#">CYS247</a> (O)  | 4.22 | <a href="#">GLY249</a> (CA)  | 1Z7XW |                                                                                                          | O[ ] ... C[ ] |
| 1Z7XW | <a href="#">CYS247</a> (O)  | 4.01 | <a href="#">GLY249</a> (C)   | 1Z7XW |                                                                                                          | O[ ] ... C[ ] |
| 1Z7XW | <a href="#">CYS247</a> (O)  | 4.95 | <a href="#">GLY249</a> (O)   | 1Z7XW |                                                                                                          |               |
| 1Z7XW | <a href="#">CYS247</a> (N)  | 4.95 | <a href="#">LEU250</a> (N)   | 1Z7XW |                                                                                                          |               |
| 1Z7XW | <a href="#">CYS247</a> (N)  | 4.91 | <a href="#">LEU250</a> (CB)  | 1Z7XW |                                                                                                          |               |
| 1Z7XW | <a href="#">CYS247</a> (N)  | 4.65 | <a href="#">LEU250</a> (CG)  | 1Z7XW |                                                                                                          |               |
| 1Z7XW | <a href="#">CYS247</a> (N)  | 4.17 | <a href="#">LEU250</a> (CD1) | 1Z7XW |                                                                                                          | N[ ] ... C[ ] |
| 1Z7XW | <a href="#">CYS247</a> (CA) | 4.41 | <a href="#">LEU250</a> (N)   | 1Z7XW |                                                                                                          | C[ ] ... N[ ] |
| 1Z7XW | <a href="#">CYS247</a> (CA) | 4.84 | <a href="#">LEU250</a> (CA)  | 1Z7XW |                                                                                                          |               |
| 1Z7XW | <a href="#">CYS247</a> (CA) | 4.10 | <a href="#">LEU250</a> (CB)  | 1Z7XW |                                                                                                          | C[ ] ... C[ ] |
| 1Z7XW | <a href="#">CYS247</a> (CA) | 4.25 | <a href="#">LEU250</a> (CG)  | 1Z7XW |                                                                                                          | C[ ] ... C[ ] |
| 1Z7XW | <a href="#">CYS247</a> (CA) | 3.86 | <a href="#">LEU250</a> (CD1) | 1Z7XW |                                                                                                          | C[ ] ... C[ ] |
| 1Z7XW | <a href="#">CYS247</a> (C)  | 3.81 | <a href="#">LEU250</a> (N)   | 1Z7XW |                                                                                                          | C[ ] ... N[ ] |
| 1Z7XW | <a href="#">CYS247</a> (C)  | 4.46 | <a href="#">LEU250</a> (CA)  | 1Z7XW |                                                                                                          | C[ ] ... C[ ] |
| 1Z7XW | <a href="#">CYS247</a> (C)  | 4.81 | <a href="#">LEU250</a> (C)   | 1Z7XW |                                                                                                          |               |
| 1Z7XW | <a href="#">CYS247</a> (C)  | 4.19 | <a href="#">LEU250</a> (CB)  | 1Z7XW |                                                                                                          | C[ ] ... C[ ] |
| 1Z7XW | <a href="#">CYS247</a> (C)  | 4.75 | <a href="#">LEU250</a> (CG)  | 1Z7XW |                                                                                                          |               |
| 1Z7XW | <a href="#">CYS247</a> (C)  | 4.80 | <a href="#">LEU250</a> (CD1) | 1Z7XW |                                                                                                          |               |
| 1Z7XW | <a href="#">CYS247</a> (O)  | 3.26 | <a href="#">LEU250</a> (N)   | 1Z7XW | <b>H-bond</b> [D-A-AA]:107.5° [A-D-DD]:94.8° d_planarity:-<br>55.1° a_planarity:-83.8°                   | O[ ] ... N[ ] |
| 1Z7XW | <a href="#">CYS247</a> (O)  | 3.69 | <a href="#">LEU250</a> (CA)  | 1Z7XW |                                                                                                          | O[ ] ... C[ ] |
| 1Z7XW | <a href="#">CYS247</a> (O)  | 3.74 | <a href="#">LEU250</a> (C)   | 1Z7XW |                                                                                                          | O[ ] ... C[ ] |
| 1Z7XW | <a href="#">CYS247</a> (O)  | 4.88 | <a href="#">LEU250</a> (O)   | 1Z7XW |                                                                                                          |               |
| 1Z7XW | <a href="#">CYS247</a> (O)  | 3.60 | <a href="#">LEU250</a> (CB)  | 1Z7XW |                                                                                                          | O[ ] ... C[ ] |
| 1Z7XW | <a href="#">CYS247</a> (O)  | 4.53 | <a href="#">LEU250</a> (CG)  | 1Z7XW |                                                                                                          |               |
| 1Z7XW | <a href="#">CYS247</a> (O)  | 4.82 | <a href="#">LEU250</a> (CD1) | 1Z7XW |                                                                                                          |               |
| 1Z7XW | <a href="#">CYS247</a> (CB) | 4.52 | <a href="#">LEU250</a> (CD1) | 1Z7XW |                                                                                                          |               |
| 1Z7XW | <a href="#">CYS247</a> (SG) | 3.96 | <a href="#">LEU250</a> (CD1) | 1Z7XW |                                                                                                          | S[ ] ... C[ ] |
| 1Z7XW | <a href="#">CYS247</a> (C)  | 4.16 | <a href="#">LEU251</a> (N)   | 1Z7XW |                                                                                                          | C[ ] ... N[ ] |
| 1Z7XW | <a href="#">CYS247</a> (C)  | 4.71 | <a href="#">LEU251</a> (CB)  | 1Z7XW |                                                                                                          |               |
| 1Z7XW | <a href="#">CYS247</a> (C)  | 4.35 | <a href="#">LEU251</a> (CG)  | 1Z7XW |                                                                                                          | C[ ] ... C[ ] |
| 1Z7XW | <a href="#">CYS247</a> (C)  | 4.42 | <a href="#">LEU251</a> (CD1) | 1Z7XW |                                                                                                          | C[ ] ... C[ ] |
| 1Z7XW | <a href="#">CYS247</a> (O)  | 2.98 | <a href="#">LEU251</a> (N)   | 1Z7XW | <b>H-bond</b> [D-A-AA]:160.3° [A-D-DD]:117.2° d_planarity:-<br>27.1° a_planarity:87.9°                   | O[ ] ... N[ ] |
| 1Z7XW | <a href="#">CYS247</a> (O)  | 3.88 | <a href="#">LEU251</a> (CA)  | 1Z7XW |                                                                                                          | O[ ] ... C[ ] |
| 1Z7XW | <a href="#">CYS247</a> (O)  | 3.58 | <a href="#">LEU251</a> (CB)  | 1Z7XW |                                                                                                          | O[ ] ... C[ ] |
| 1Z7XW | <a href="#">CYS247</a> (O)  | 3.32 | <a href="#">LEU251</a> (CG)  | 1Z7XW |                                                                                                          | O[ ] ... C[ ] |
| 1Z7XW | <a href="#">CYS247</a> (O)  | 3.70 | <a href="#">LEU251</a> (CD1) | 1Z7XW |                                                                                                          | O[ ] ... C[ ] |
| 1Z7XW | <a href="#">CYS247</a> (O)  | 4.63 | <a href="#">LEU251</a> (CD2) | 1Z7XW |                                                                                                          |               |
| 1Z7XW | <a href="#">CYS247</a> (CB) | 4.67 | <a href="#">ASP274</a> (C)   | 1Z7XW |                                                                                                          |               |
| 1Z7XW | <a href="#">CYS247</a> (CB) | 4.37 | <a href="#">ASP274</a> (O)   | 1Z7XW |                                                                                                          | C[ ] ... O[ ] |
| 1Z7XW | <a href="#">CYS247</a> (CB) | 4.46 | <a href="#">ASP274</a> (CB)  | 1Z7XW |                                                                                                          | C[ ] ... C[ ] |
| 1Z7XW | <a href="#">CYS247</a> (SG) | 4.61 | <a href="#">ASP274</a> (CA)  | 1Z7XW |                                                                                                          |               |
| 1Z7XW | <a href="#">CYS247</a> (SG) | 3.92 | <a href="#">ASP274</a> (C)   | 1Z7XW |                                                                                                          | S[ ] ... C[ ] |
| 1Z7XW | <a href="#">CYS247</a> (SG) | 3.92 | <a href="#">ASP274</a> (O)   | 1Z7XW |                                                                                                          | S[ ] ... O[ ] |
| 1Z7XW | <a href="#">CYS247</a> (SG) | 4.02 | <a href="#">ASP274</a> (CB)  | 1Z7XW | Negative                                                                                                 | S[ ] ... C[ ] |

|       |                            |      |                             |       |                                                                                                                      |               |
|-------|----------------------------|------|-----------------------------|-------|----------------------------------------------------------------------------------------------------------------------|---------------|
| 1Z7XW | <a href="#">CYS247(SG)</a> | 4.01 | <a href="#">LEU275(N)</a>   | 1Z7XW | [D-A-AA]:121.1° [A-D-DD]:85.0° d_planarity:70.9°,<br>maximum distance exceeded, bad d_angle(sp2),<br>bad d_planarity | S[ ] ... N[ ] |
| 1Z7XW | <a href="#">CYS247(SG)</a> | 4.15 | <a href="#">LEU275(CA)</a>  | 1Z7XW |                                                                                                                      | S[ ] ... C[ ] |
| 1Z7XW | <a href="#">CYS247(SG)</a> | 4.82 | <a href="#">LEU275(CB)</a>  | 1Z7XW |                                                                                                                      |               |
| 1Z7XW | <a href="#">CYS247(SG)</a> | 4.97 | <a href="#">LEU275(CG)</a>  | 1Z7XW |                                                                                                                      |               |
| 1Z7XW | <a href="#">CYS247(SG)</a> | 4.00 | <a href="#">LEU275(CD1)</a> | 1Z7XW |                                                                                                                      | S[ ] ... C[ ] |
| 1Z7XW | <a href="#">CYS247(CA)</a> | 4.22 | <a href="#">VAL278(CG2)</a> | 1Z7XW |                                                                                                                      | C[ ] ... C[ ] |
| 1Z7XW | <a href="#">CYS247(C)</a>  | 4.60 | <a href="#">VAL278(CG2)</a> | 1Z7XW |                                                                                                                      |               |
| 1Z7XW | <a href="#">CYS247(O)</a>  | 4.08 | <a href="#">VAL278(CG2)</a> | 1Z7XW |                                                                                                                      | O[ ] ... C[ ] |
| 1Z7XW | <a href="#">CYS247(CB)</a> | 3.79 | <a href="#">VAL278(CG2)</a> | 1Z7XW |                                                                                                                      | C[ ] ... C[ ] |
| 1Z7XW | <a href="#">CYS247(SG)</a> | 4.79 | <a href="#">VAL278(CB)</a>  | 1Z7XW |                                                                                                                      |               |
| 1Z7XW | <a href="#">CYS247(SG)</a> | 3.70 | <a href="#">VAL278(CG2)</a> | 1Z7XW |                                                                                                                      | S[ ] ... C[ ] |

| chain1 | res1/atm1                  | distance | res2/atm2                  | chain2 | H-bonding                                                                                                             | Charge interaction |
|--------|----------------------------|----------|----------------------------|--------|-----------------------------------------------------------------------------------------------------------------------|--------------------|
| 1ZNQO  | <a href="#">CYS152(N)</a>  | 4.54     | <a href="#">ALA150(C)</a>  | 1ZNQO  |                                                                                                                       |                    |
| 1ZNQO  | <a href="#">CYS152(N)</a>  | 4.59     | <a href="#">ALA150(O)</a>  | 1ZNQO  | [D-A-AA]:79.7° [A-D-DD]:144.7° d_planarity:57.4°<br>a_planarity:19.2°, maximum distance exceeded,<br>bad a_angle(sp2) |                    |
| 1ZNQO  | <a href="#">CYS152(N)</a>  | 3.66     | <a href="#">SER151(N)</a>  | 1ZNQO  |                                                                                                                       | N[ ] ... N[ ]      |
| 1ZNQO  | <a href="#">CYS152(N)</a>  | 2.42     | <a href="#">SER151(CA)</a> | 1ZNQO  |                                                                                                                       | N[ ] ... C[ ]      |
| 1ZNQO  | <a href="#">CYS152(N)</a>  | 2.25     | <a href="#">SER151(O)</a>  | 1ZNQO  | [D-A-AA]:29.7° [A-D-DD]:93.5° d_planarity:0.4°<br>a_planarity:0.6°, bad a_angle(sp2)                                  | N[ ] ... O[ ]      |
| 1ZNQO  | <a href="#">CYS152(N)</a>  | 3.04     | <a href="#">SER151(CB)</a> | 1ZNQO  |                                                                                                                       | N[ ] ... C[ ]      |
| 1ZNQO  | <a href="#">CYS152(N)</a>  | 3.38     | <a href="#">SER151(OG)</a> | 1ZNQO  | <b>H-bond</b> [D-A-AA]:64.3° [A-D-DD]:124.3°<br>d_planarity:58.9°                                                     | N[ ] ... O[ ]      |
| 1ZNQO  | <a href="#">CYS152(CA)</a> | 4.88     | <a href="#">SER151(N)</a>  | 1ZNQO  |                                                                                                                       |                    |
| 1ZNQO  | <a href="#">CYS152(CA)</a> | 3.79     | <a href="#">SER151(CA)</a> | 1ZNQO  |                                                                                                                       | C[ ] ... C[ ]      |
| 1ZNQO  | <a href="#">CYS152(CA)</a> | 2.42     | <a href="#">SER151(C)</a>  | 1ZNQO  |                                                                                                                       | C[ ] ... C[ ]      |
| 1ZNQO  | <a href="#">CYS152(CA)</a> | 2.75     | <a href="#">SER151(O)</a>  | 1ZNQO  |                                                                                                                       | C[ ] ... O[ ]      |
| 1ZNQO  | <a href="#">CYS152(CA)</a> | 4.35     | <a href="#">SER151(CB)</a> | 1ZNQO  |                                                                                                                       | C[ ] ... C[ ]      |
| 1ZNQO  | <a href="#">CYS152(CA)</a> | 4.36     | <a href="#">SER151(OG)</a> | 1ZNQO  |                                                                                                                       | C[ ] ... O[ ]      |
| 1ZNQO  | <a href="#">CYS152(C)</a>  | 4.30     | <a href="#">SER151(CA)</a> | 1ZNQO  |                                                                                                                       | C[ ] ... C[ ]      |
| 1ZNQO  | <a href="#">CYS152(C)</a>  | 2.89     | <a href="#">SER151(C)</a>  | 1ZNQO  |                                                                                                                       | C[ ] ... C[ ]      |
| 1ZNQO  | <a href="#">CYS152(C)</a>  | 2.76     | <a href="#">SER151(O)</a>  | 1ZNQO  |                                                                                                                       | C[ ] ... O[ ]      |
| 1ZNQO  | <a href="#">CYS152(C)</a>  | 4.58     | <a href="#">SER151(CB)</a> | 1ZNQO  |                                                                                                                       |                    |
| 1ZNQO  | <a href="#">CYS152(C)</a>  | 4.10     | <a href="#">SER151(OG)</a> | 1ZNQO  |                                                                                                                       | C[ ] ... O[ ]      |
| 1ZNQO  | <a href="#">CYS152(O)</a>  | 3.64     | <a href="#">SER151(C)</a>  | 1ZNQO  |                                                                                                                       | O[ ] ... C[ ]      |
| 1ZNQO  | <a href="#">CYS152(O)</a>  | 3.11     | <a href="#">SER151(O)</a>  | 1ZNQO  |                                                                                                                       | O[ ] ... O[ ]      |
| 1ZNQO  | <a href="#">CYS152(O)</a>  | 4.92     | <a href="#">SER151(OG)</a> | 1ZNQO  | [D-A-AA]:42.3° [A-D-DD]:107.9° a_planarity:65.0°,<br>maximum distance exceeded, bad a_angle(sp2)                      |                    |
| 1ZNQO  | <a href="#">CYS152(CB)</a> | 4.88     | <a href="#">SER151(CA)</a> | 1ZNQO  |                                                                                                                       |                    |
| 1ZNQO  | <a href="#">CYS152(CB)</a> | 3.74     | <a href="#">SER151(C)</a>  | 1ZNQO  |                                                                                                                       | C[ ] ... C[ ]      |
| 1ZNQO  | <a href="#">CYS152(CB)</a> | 4.27     | <a href="#">SER151(O)</a>  | 1ZNQO  |                                                                                                                       | C[ ] ... O[ ]      |
| 1ZNQO  | <a href="#">CYS152(SG)</a> | 4.38     | <a href="#">SER151(C)</a>  | 1ZNQO  |                                                                                                                       | S[ ] ... C[ ]      |
| 1ZNQO  | <a href="#">CYS152(SG)</a> | 4.99     | <a href="#">SER151(CB)</a> | 1ZNQO  |                                                                                                                       |                    |
| 1ZNQO  | <a href="#">CYS152(N)</a>  | 2.82     | <a href="#">THR153(N)</a>  | 1ZNQO  |                                                                                                                       | N[ ] ... N[ ]      |

|       |                            |      |                             |       |                                                                                                                                     |               |
|-------|----------------------------|------|-----------------------------|-------|-------------------------------------------------------------------------------------------------------------------------------------|---------------|
| 1ZNQO | <a href="#">CYS152(N)</a>  | 4.22 | <a href="#">THR153(CA)</a>  | 1ZNQO |                                                                                                                                     | N[ ] ... C[ ] |
| 1ZNQO | <a href="#">CYS152(N)</a>  | 4.77 | <a href="#">THR153(C)</a>   | 1ZNQO |                                                                                                                                     |               |
| 1ZNQO | <a href="#">CYS152(CA)</a> | 2.43 | <a href="#">THR153(N)</a>   | 1ZNQO |                                                                                                                                     | C[ ] ... N[ ] |
| 1ZNQO | <a href="#">CYS152(CA)</a> | 3.80 | <a href="#">THR153(CA)</a>  | 1ZNQO |                                                                                                                                     | C[ ] ... C[ ] |
| 1ZNQO | <a href="#">CYS152(CA)</a> | 4.50 | <a href="#">THR153(C)</a>   | 1ZNQO |                                                                                                                                     |               |
| 1ZNQO | <a href="#">CYS152(CA)</a> | 4.88 | <a href="#">THR153(CB)</a>  | 1ZNQO |                                                                                                                                     |               |
| 1ZNQO | <a href="#">CYS152(CA)</a> | 4.89 | <a href="#">THR153(OG1)</a> | 1ZNQO |                                                                                                                                     |               |
| 1ZNQO | <a href="#">CYS152(C)</a>  | 2.43 | <a href="#">THR153(CA)</a>  | 1ZNQO |                                                                                                                                     | C[ ] ... C[ ] |
| 1ZNQO | <a href="#">CYS152(C)</a>  | 3.09 | <a href="#">THR153(C)</a>   | 1ZNQO |                                                                                                                                     | C[ ] ... C[ ] |
| 1ZNQO | <a href="#">CYS152(C)</a>  | 3.98 | <a href="#">THR153(O)</a>   | 1ZNQO |                                                                                                                                     | C[ ] ... O[ ] |
| 1ZNQO | <a href="#">CYS152(C)</a>  | 3.72 | <a href="#">THR153(CB)</a>  | 1ZNQO |                                                                                                                                     | C[ ] ... C[ ] |
| 1ZNQO | <a href="#">CYS152(C)</a>  | 4.01 | <a href="#">THR153(OG1)</a> | 1ZNQO |                                                                                                                                     | C[ ] ... O[ ] |
| 1ZNQO | <a href="#">CYS152(C)</a>  | 4.91 | <a href="#">THR153(CG2)</a> | 1ZNQO |                                                                                                                                     |               |
| 1ZNQO | <a href="#">CYS152(O)</a>  | 2.24 | <a href="#">THR153(N)</a>   | 1ZNQO | [D-A-AA]:29.9° [A-D-DD]:93.7° d_planarity:1.3°<br>a_planarity:1.6°, <b>bad a_angle(sp2)</b>                                         | O[ ] ... N[ ] |
| 1ZNQO | <a href="#">CYS152(O)</a>  | 2.75 | <a href="#">THR153(CA)</a>  | 1ZNQO |                                                                                                                                     | O[ ] ... C[ ] |
| 1ZNQO | <a href="#">CYS152(O)</a>  | 3.01 | <a href="#">THR153(C)</a>   | 1ZNQO |                                                                                                                                     | O[ ] ... C[ ] |
| 1ZNQO | <a href="#">CYS152(O)</a>  | 3.57 | <a href="#">THR153(O)</a>   | 1ZNQO |                                                                                                                                     | O[ ] ... O[ ] |
| 1ZNQO | <a href="#">CYS152(O)</a>  | 4.26 | <a href="#">THR153(CB)</a>  | 1ZNQO |                                                                                                                                     | O[ ] ... C[ ] |
| 1ZNQO | <a href="#">CYS152(O)</a>  | 4.73 | <a href="#">THR153(OG1)</a> | 1ZNQO | [D-A-AA]:47.7° [A-D-DD]:62.2° a_planarity:21.2°,<br><b>maximum distance exceeded, bad a_angle(sp2)</b>                              |               |
| 1ZNQO | <a href="#">CYS152(CB)</a> | 3.09 | <a href="#">THR153(N)</a>   | 1ZNQO |                                                                                                                                     | C[ ] ... N[ ] |
| 1ZNQO | <a href="#">CYS152(CB)</a> | 4.41 | <a href="#">THR153(CA)</a>  | 1ZNQO |                                                                                                                                     | C[ ] ... C[ ] |
| 1ZNQO | <a href="#">CYS152(CB)</a> | 4.82 | <a href="#">THR153(OG1)</a> | 1ZNQO |                                                                                                                                     |               |
| 1ZNQO | <a href="#">CYS152(SG)</a> | 3.39 | <a href="#">THR153(N)</a>   | 1ZNQO | <b>H-bond</b> [D-A-AA]:64.8° [A-D-DD]:139.4° d_planarity:-<br>57.0°                                                                 | S[ ] ... N[ ] |
| 1ZNQO | <a href="#">CYS152(SG)</a> | 4.59 | <a href="#">THR153(CA)</a>  | 1ZNQO |                                                                                                                                     |               |
| 1ZNQO | <a href="#">CYS152(SG)</a> | 4.87 | <a href="#">THR153(CB)</a>  | 1ZNQO |                                                                                                                                     |               |
| 1ZNQO | <a href="#">CYS152(SG)</a> | 4.08 | <a href="#">THR153(OG1)</a> | 1ZNQO | [D-A-AA]:102.8° [A-D-DD]:115.6°, <b>maximum distance exceeded</b>                                                                   | S[ ] ... O[ ] |
| 1ZNQO | <a href="#">CYS152(N)</a>  | 4.38 | <a href="#">THR154(N)</a>   | 1ZNQO |                                                                                                                                     | N[ ] ... N[ ] |
| 1ZNQO | <a href="#">CYS152(CA)</a> | 4.48 | <a href="#">THR154(N)</a>   | 1ZNQO |                                                                                                                                     | C[ ] ... N[ ] |
| 1ZNQO | <a href="#">CYS152(C)</a>  | 3.34 | <a href="#">THR154(N)</a>   | 1ZNQO |                                                                                                                                     | C[ ] ... N[ ] |
| 1ZNQO | <a href="#">CYS152(C)</a>  | 4.56 | <a href="#">THR154(CA)</a>  | 1ZNQO |                                                                                                                                     |               |
| 1ZNQO | <a href="#">CYS152(C)</a>  | 4.67 | <a href="#">THR154(C)</a>   | 1ZNQO |                                                                                                                                     |               |
| 1ZNQO | <a href="#">CYS152(O)</a>  | 3.43 | <a href="#">THR154(N)</a>   | 1ZNQO | [D-A-AA]:75.9° [A-D-DD]:123.6° d_planarity:73.1°<br>a_planarity:46.6°, <b>bad a_angle(sp2), bad d_planarity</b>                     | O[ ] ... N[ ] |
| 1ZNQO | <a href="#">CYS152(O)</a>  | 4.40 | <a href="#">THR154(CA)</a>  | 1ZNQO |                                                                                                                                     | O[ ] ... C[ ] |
| 1ZNQO | <a href="#">CYS152(O)</a>  | 4.14 | <a href="#">THR154(C)</a>   | 1ZNQO |                                                                                                                                     | O[ ] ... C[ ] |
| 1ZNQO | <a href="#">CYS152(N)</a>  | 4.97 | <a href="#">ASN155(N)</a>   | 1ZNQO |                                                                                                                                     |               |
| 1ZNQO | <a href="#">CYS152(N)</a>  | 4.86 | <a href="#">ASN155(OD1)</a> | 1ZNQO | [D-A-AA]:117.0° [A-D-DD]:87.1° d_planarity:29.1°<br>a_planarity:25.5°, <b>maximum distance exceeded,</b><br><b>bad d_angle(sp2)</b> |               |
| 1ZNQO | <a href="#">CYS152(CA)</a> | 4.76 | <a href="#">ASN155(N)</a>   | 1ZNQO |                                                                                                                                     |               |
| 1ZNQO | <a href="#">CYS152(CA)</a> | 4.82 | <a href="#">ASN155(CB)</a>  | 1ZNQO |                                                                                                                                     |               |
| 1ZNQO | <a href="#">CYS152(C)</a>  | 3.88 | <a href="#">ASN155(N)</a>   | 1ZNQO |                                                                                                                                     | C[ ] ... N[ ] |
| 1ZNQO | <a href="#">CYS152(C)</a>  | 4.65 | <a href="#">ASN155(CA)</a>  | 1ZNQO |                                                                                                                                     |               |
| 1ZNQO | <a href="#">CYS152(C)</a>  | 4.48 | <a href="#">ASN155(CB)</a>  | 1ZNQO |                                                                                                                                     | C[ ] ... C[ ] |
| 1ZNQO | <a href="#">CYS152(O)</a>  | 3.24 | <a href="#">ASN155(N)</a>   | 1ZNQO | <b>H-bond</b> [D-A-AA]:112.6° [A-D-DD]:98.9° d_planarity:-<br>41.3° a_planarity:79.4°                                               | O[ ] ... N[ ] |
| 1ZNQO | <a href="#">CYS152(O)</a>  | 3.75 | <a href="#">ASN155(CA)</a>  | 1ZNQO |                                                                                                                                     | O[ ] ... C[ ] |

|       |                            |      |                             |       |                                                                                    |               |
|-------|----------------------------|------|-----------------------------|-------|------------------------------------------------------------------------------------|---------------|
| 1ZNQO | <a href="#">CYS152(O)</a>  | 3.90 | <a href="#">ASN155(C)</a>   | 1ZNQO |                                                                                    | O[ ] ... C[ ] |
| 1ZNQO | <a href="#">CYS152(O)</a>  | 4.93 | <a href="#">ASN155(O)</a>   | 1ZNQO |                                                                                    |               |
| 1ZNQO | <a href="#">CYS152(O)</a>  | 3.65 | <a href="#">ASN155(CB)</a>  | 1ZNQO |                                                                                    | O[ ] ... C[ ] |
| 1ZNQO | <a href="#">CYS152(O)</a>  | 4.76 | <a href="#">ASN155(CG)</a>  | 1ZNQO |                                                                                    |               |
| 1ZNQO | <a href="#">CYS152(O)</a>  | 4.84 | <a href="#">ASN155(OD1)</a> | 1ZNQO |                                                                                    |               |
| 1ZNQO | <a href="#">CYS152(C)</a>  | 4.48 | <a href="#">CYS156(N)</a>   | 1ZNQO |                                                                                    | C[ ] ... N[ ] |
| 1ZNQO | <a href="#">CYS152(C)</a>  | 4.97 | <a href="#">CYS156(CB)</a>  | 1ZNQO |                                                                                    |               |
| 1ZNQO | <a href="#">CYS152(O)</a>  | 3.37 | <a href="#">CYS156(N)</a>   | 1ZNQO | <b>H-bond</b> [D-A-AA]:150.4° [A-D-DD]:118.7° d_planarity:-50.7° a_planarity:37.9° | O[ ] ... N[ ] |
| 1ZNQO | <a href="#">CYS152(O)</a>  | 4.26 | <a href="#">CYS156(CA)</a>  | 1ZNQO |                                                                                    | O[ ] ... C[ ] |
| 1ZNQO | <a href="#">CYS152(O)</a>  | 3.99 | <a href="#">CYS156(CB)</a>  | 1ZNQO |                                                                                    | O[ ] ... C[ ] |
| 1ZNQO | <a href="#">CYS152(CB)</a> | 4.73 | <a href="#">HIS179(CE1)</a> | 1ZNQO |                                                                                    |               |
| 1ZNQO | <a href="#">CYS152(SG)</a> | 4.55 | <a href="#">HIS179(ND1)</a> | 1ZNQO | [D-A-AA]:122.5° [A-D-DD]:137.6° d_planarity:20.1°,<br>maximum distance exceeded    |               |
| 1ZNQO | <a href="#">CYS152(SG)</a> | 3.50 | <a href="#">HIS179(CE1)</a> | 1ZNQO |                                                                                    | S[ ] ... C[ ] |
| 1ZNQO | <a href="#">CYS152(SG)</a> | 4.18 | <a href="#">HIS179(NE2)</a> | 1ZNQO | Weakly positive                                                                    | S[ ] ... N[ ] |
| 1ZNQO | <a href="#">CYS152(O)</a>  | 5.00 | <a href="#">SER292(O)</a>   | 1ZNQO |                                                                                    |               |
| 1ZNQO | <a href="#">CYS152(CA)</a> | 4.94 | <a href="#">TYR314(CD2)</a> | 1ZNQO |                                                                                    |               |
| 1ZNQO | <a href="#">CYS152(CA)</a> | 4.55 | <a href="#">TYR314(CE2)</a> | 1ZNQO |                                                                                    |               |
| 1ZNQO | <a href="#">CYS152(C)</a>  | 4.22 | <a href="#">TYR314(CD2)</a> | 1ZNQO |                                                                                    | C[ ] ... C[ ] |
| 1ZNQO | <a href="#">CYS152(C)</a>  | 3.73 | <a href="#">TYR314(CE2)</a> | 1ZNQO |                                                                                    | C[ ] ... C[ ] |
| 1ZNQO | <a href="#">CYS152(C)</a>  | 4.68 | <a href="#">TYR314(CZ)</a>  | 1ZNQO |                                                                                    |               |
| 1ZNQO | <a href="#">CYS152(C)</a>  | 4.86 | <a href="#">TYR314(OH)</a>  | 1ZNQO |                                                                                    |               |
| 1ZNQO | <a href="#">CYS152(O)</a>  | 4.86 | <a href="#">TYR314(CG)</a>  | 1ZNQO |                                                                                    |               |
| 1ZNQO | <a href="#">CYS152(O)</a>  | 3.80 | <a href="#">TYR314(CD2)</a> | 1ZNQO |                                                                                    | O[ ] ... C[ ] |
| 1ZNQO | <a href="#">CYS152(O)</a>  | 3.65 | <a href="#">TYR314(CE2)</a> | 1ZNQO |                                                                                    | O[ ] ... C[ ] |
| 1ZNQO | <a href="#">CYS152(O)</a>  | 4.63 | <a href="#">TYR314(CZ)</a>  | 1ZNQO |                                                                                    |               |
| 1ZNQO | <a href="#">CYS152(CB)</a> | 4.58 | <a href="#">TYR314(CD2)</a> | 1ZNQO |                                                                                    |               |
| 1ZNQO | <a href="#">CYS152(CB)</a> | 4.12 | <a href="#">TYR314(CE2)</a> | 1ZNQO |                                                                                    | C[ ] ... C[ ] |
| 1ZNQO | <a href="#">CYS152(SG)</a> | 4.60 | <a href="#">TYR314(CE2)</a> | 1ZNQO |                                                                                    |               |
| 1ZNQO | <a href="#">CYS152(CA)</a> | 4.93 | <a href="#">ASN316(O)</a>   | 1ZNQO |                                                                                    |               |
| 1ZNQO | <a href="#">CYS152(CB)</a> | 4.18 | <a href="#">ASN316(CA)</a>  | 1ZNQO |                                                                                    | C[ ] ... C[ ] |
| 1ZNQO | <a href="#">CYS152(CB)</a> | 4.45 | <a href="#">ASN316(C)</a>   | 1ZNQO |                                                                                    | C[ ] ... C[ ] |
| 1ZNQO | <a href="#">CYS152(CB)</a> | 3.78 | <a href="#">ASN316(O)</a>   | 1ZNQO |                                                                                    | C[ ] ... O[ ] |
| 1ZNQO | <a href="#">CYS152(CB)</a> | 3.97 | <a href="#">ASN316(CB)</a>  | 1ZNQO |                                                                                    | C[ ] ... C[ ] |
| 1ZNQO | <a href="#">CYS152(SG)</a> | 4.93 | <a href="#">ASN316(CA)</a>  | 1ZNQO |                                                                                    |               |
| 1ZNQO | <a href="#">CYS152(SG)</a> | 4.67 | <a href="#">ASN316(O)</a>   | 1ZNQO |                                                                                    |               |
| 1ZNQO | <a href="#">CYS152(SG)</a> | 4.14 | <a href="#">ASN316(CB)</a>  | 1ZNQO |                                                                                    | S[ ] ... C[ ] |
| 1ZNQO | <a href="#">CYS152(N)</a>  | 4.52 | <a href="#">TYR320(CG)</a>  | 1ZNQO |                                                                                    |               |
| 1ZNQO | <a href="#">CYS152(N)</a>  | 3.73 | <a href="#">TYR320(CD1)</a> | 1ZNQO |                                                                                    | N[ ] ... C[ ] |
| 1ZNQO | <a href="#">CYS152(N)</a>  | 3.88 | <a href="#">TYR320(CE1)</a> | 1ZNQO |                                                                                    | N[ ] ... C[ ] |
| 1ZNQO | <a href="#">CYS152(N)</a>  | 4.77 | <a href="#">TYR320(CZ)</a>  | 1ZNQO |                                                                                    |               |
| 1ZNQO | <a href="#">CYS152(CA)</a> | 4.51 | <a href="#">TYR320(CB)</a>  | 1ZNQO |                                                                                    |               |
| 1ZNQO | <a href="#">CYS152(CA)</a> | 4.35 | <a href="#">TYR320(CG)</a>  | 1ZNQO |                                                                                    | C[ ] ... C[ ] |
| 1ZNQO | <a href="#">CYS152(CA)</a> | 3.73 | <a href="#">TYR320(CD1)</a> | 1ZNQO |                                                                                    | C[ ] ... C[ ] |
| 1ZNQO | <a href="#">CYS152(CA)</a> | 4.36 | <a href="#">TYR320(CE1)</a> | 1ZNQO |                                                                                    | C[ ] ... C[ ] |
| 1ZNQO | <a href="#">CYS152(C)</a>  | 4.92 | <a href="#">TYR320(CD1)</a> | 1ZNQO |                                                                                    |               |
| 1ZNQO | <a href="#">CYS152(CB)</a> | 4.48 | <a href="#">TYR320(CB)</a>  | 1ZNQO |                                                                                    | C[ ] ... C[ ] |
| 1ZNQO | <a href="#">CYS152(CB)</a> | 4.62 | <a href="#">TYR320(CG)</a>  | 1ZNQO |                                                                                    |               |



|       |                             |      |                               |       |                                                                 |               |
|-------|-----------------------------|------|-------------------------------|-------|-----------------------------------------------------------------|---------------|
| 1ZNQO | <a href="#">CYS152</a> (CB) | 4.45 | <a href="#">TYR320</a> (CD1)  | 1ZNQO |                                                                 | C[ ] ... C[ ] |
| 1ZNQO | <a href="#">CYS152</a> (N)  | 4.36 | <a href="#">NAD1001</a> (C4N) | 1ZNQO |                                                                 | N[ ] ... C[ ] |
| 1ZNQO | <a href="#">CYS152</a> (N)  | 3.48 | <a href="#">NAD1001</a> (C5N) | 1ZNQO |                                                                 | N[ ] ... C[ ] |
| 1ZNQO | <a href="#">CYS152</a> (N)  | 4.17 | <a href="#">NAD1001</a> (C6N) | 1ZNQO |                                                                 | N[ ] ... C[ ] |
| 1ZNQO | <a href="#">CYS152</a> (CA) | 4.33 | <a href="#">NAD1001</a> (C4N) | 1ZNQO |                                                                 | C[ ] ... C[ ] |
| 1ZNQO | <a href="#">CYS152</a> (CA) | 3.89 | <a href="#">NAD1001</a> (C5N) | 1ZNQO |                                                                 | C[ ] ... C[ ] |
| 1ZNQO | <a href="#">CYS152</a> (CA) | 4.91 | <a href="#">NAD1001</a> (C6N) | 1ZNQO |                                                                 |               |
| 1ZNQO | <a href="#">CYS152</a> (CB) | 4.71 | <a href="#">NAD1001</a> (C3N) | 1ZNQO |                                                                 |               |
| 1ZNQO | <a href="#">CYS152</a> (CB) | 3.31 | <a href="#">NAD1001</a> (C4N) | 1ZNQO |                                                                 | C[ ] ... C[ ] |
| 1ZNQO | <a href="#">CYS152</a> (CB) | 3.39 | <a href="#">NAD1001</a> (C5N) | 1ZNQO |                                                                 | C[ ] ... C[ ] |
| 1ZNQO | <a href="#">CYS152</a> (CB) | 4.60 | <a href="#">NAD1001</a> (C6N) | 1ZNQO |                                                                 |               |
| 1ZNQO | <a href="#">CYS152</a> (SG) | 4.27 | <a href="#">NAD1001</a> (C3N) | 1ZNQO |                                                                 | S[ ] ... C[ ] |
| 1ZNQO | <a href="#">CYS152</a> (SG) | 4.86 | <a href="#">NAD1001</a> (O7N) | 1ZNQO | [D-A-AA]:91.5° [A-D-DD]:89.5°, <b>maximum distance exceeded</b> |               |
| 1ZNQO | <a href="#">CYS152</a> (SG) | 3.26 | <a href="#">NAD1001</a> (C4N) | 1ZNQO |                                                                 | S[ ] ... C[ ] |
| 1ZNQO | <a href="#">CYS152</a> (SG) | 3.45 | <a href="#">NAD1001</a> (C5N) | 1ZNQO |                                                                 | S[ ] ... C[ ] |
| 1ZNQO | <a href="#">CYS152</a> (SG) | 4.40 | <a href="#">NAD1001</a> (C6N) | 1ZNQO | Ligand                                                          | S[ ] ... C[ ] |

| chain1 | res1/atm1                   | distance | res2/atm2                    | chain2 | H-bonding                                                                                                                                             | Charge interaction |
|--------|-----------------------------|----------|------------------------------|--------|-------------------------------------------------------------------------------------------------------------------------------------------------------|--------------------|
| 1ZNQO  | <a href="#">CYS247</a> (SG) | 4.58     | <a href="#">ILE164</a> (CG2) | 1ZNQO  |                                                                                                                                                       |                    |
| 1ZNQO  | <a href="#">CYS247</a> (CB) | 4.81     | <a href="#">ILE170</a> (CG1) | 1ZNQO  |                                                                                                                                                       |                    |
| 1ZNQO  | <a href="#">CYS247</a> (CB) | 4.18     | <a href="#">ILE170</a> (CG2) | 1ZNQO  |                                                                                                                                                       | C[ ] ... C[ ]      |
| 1ZNQO  | <a href="#">CYS247</a> (SG) | 4.68     | <a href="#">ILE170</a> (CG1) | 1ZNQO  |                                                                                                                                                       |                    |
| 1ZNQO  | <a href="#">CYS247</a> (SG) | 5.00     | <a href="#">ILE170</a> (CG2) | 1ZNQO  |                                                                                                                                                       |                    |
| 1ZNQO  | <a href="#">CYS247</a> (SG) | 4.84     | <a href="#">ILE170</a> (CD1) | 1ZNQO  |                                                                                                                                                       |                    |
| 1ZNQO  | <a href="#">CYS247</a> (N)  | 4.58     | <a href="#">GLU172</a> (O)   | 1ZNQO  | [D-A-AA]:136.0° [A-D-DD]:24.0° d_planarity:8.5°<br>a_planarity:0.7°, <b>maximum distance exceeded,</b><br><b>bad d_angle(sp2)</b>                     |                    |
| 1ZNQO  | <a href="#">CYS247</a> (CA) | 4.37     | <a href="#">GLU172</a> (C)   | 1ZNQO  |                                                                                                                                                       | C[ ] ... C[ ]      |
| 1ZNQO  | <a href="#">CYS247</a> (CA) | 3.31     | <a href="#">GLU172</a> (O)   | 1ZNQO  |                                                                                                                                                       | C[ ] ... O[ ]      |
| 1ZNQO  | <a href="#">CYS247</a> (C)  | 4.86     | <a href="#">GLU172</a> (C)   | 1ZNQO  |                                                                                                                                                       |                    |
| 1ZNQO  | <a href="#">CYS247</a> (C)  | 3.64     | <a href="#">GLU172</a> (O)   | 1ZNQO  |                                                                                                                                                       | C[ ] ... O[ ]      |
| 1ZNQO  | <a href="#">CYS247</a> (O)  | 4.87     | <a href="#">GLU172</a> (O)   | 1ZNQO  |                                                                                                                                                       |                    |
| 1ZNQO  | <a href="#">CYS247</a> (CB) | 4.32     | <a href="#">GLU172</a> (C)   | 1ZNQO  |                                                                                                                                                       | C[ ] ... C[ ]      |
| 1ZNQO  | <a href="#">CYS247</a> (CB) | 3.41     | <a href="#">GLU172</a> (O)   | 1ZNQO  |                                                                                                                                                       | C[ ] ... O[ ]      |
| 1ZNQO  | <a href="#">CYS247</a> (N)  | 4.66     | <a href="#">GLY173</a> (CA)  | 1ZNQO  |                                                                                                                                                       |                    |
| 1ZNQO  | <a href="#">CYS247</a> (CA) | 4.72     | <a href="#">GLY173</a> (N)   | 1ZNQO  |                                                                                                                                                       |                    |
| 1ZNQO  | <a href="#">CYS247</a> (CA) | 4.04     | <a href="#">GLY173</a> (CA)  | 1ZNQO  |                                                                                                                                                       | C[ ] ... C[ ]      |
| 1ZNQO  | <a href="#">CYS247</a> (CB) | 4.59     | <a href="#">GLY173</a> (N)   | 1ZNQO  |                                                                                                                                                       |                    |
| 1ZNQO  | <a href="#">CYS247</a> (CB) | 3.95     | <a href="#">GLY173</a> (CA)  | 1ZNQO  |                                                                                                                                                       | C[ ] ... C[ ]      |
| 1ZNQO  | <a href="#">CYS247</a> (N)  | 4.02     | <a href="#">LEU245</a> (C)   | 1ZNQO  |                                                                                                                                                       | N[ ] ... C[ ]      |
| 1ZNQO  | <a href="#">CYS247</a> (N)  | 4.03     | <a href="#">LEU245</a> (O)   | 1ZNQO  | [D-A-AA]:80.7° [A-D-DD]:145.2° d_planarity:-86.2°<br>a_planarity:33.2°, <b>maximum distance exceeded,</b><br><b>bad a_angle(sp2), bad d_planarity</b> | N[ ] ... O[ ]      |
| 1ZNQO  | <a href="#">CYS247</a> (N)  | 4.78     | <a href="#">LEU245</a> (CG)  | 1ZNQO  |                                                                                                                                                       |                    |
| 1ZNQO  | <a href="#">CYS247</a> (N)  | 4.90     | <a href="#">LEU245</a> (CD1) | 1ZNQO  |                                                                                                                                                       |                    |
| 1ZNQO  | <a href="#">CYS247</a> (CB) | 4.50     | <a href="#">LEU245</a> (CG)  | 1ZNQO  |                                                                                                                                                       | C[ ] ... C[ ]      |
| 1ZNQO  | <a href="#">CYS247</a> (CB) | 4.51     | <a href="#">LEU245</a> (CD1) | 1ZNQO  |                                                                                                                                                       |                    |

|       |                            |      |                             |       |                                                                                                  |               |
|-------|----------------------------|------|-----------------------------|-------|--------------------------------------------------------------------------------------------------|---------------|
| 1ZNQO | <a href="#">CYS247(CB)</a> | 4.94 | <a href="#">LEU245(CD2)</a> | 1ZNQO |                                                                                                  |               |
| 1ZNQO | <a href="#">CYS247(SG)</a> | 4.78 | <a href="#">LEU245(O)</a>   | 1ZNQO |                                                                                                  |               |
| 1ZNQO | <a href="#">CYS247(SG)</a> | 4.20 | <a href="#">LEU245(CG)</a>  | 1ZNQO |                                                                                                  | S[ ] ... C[ ] |
| 1ZNQO | <a href="#">CYS247(SG)</a> | 4.80 | <a href="#">LEU245(CD1)</a> | 1ZNQO |                                                                                                  |               |
| 1ZNQO | <a href="#">CYS247(SG)</a> | 4.33 | <a href="#">LEU245(CD2)</a> | 1ZNQO |                                                                                                  | S[ ] ... C[ ] |
| 1ZNQO | <a href="#">CYS247(N)</a>  | 3.38 | <a href="#">THR246(N)</a>   | 1ZNQO |                                                                                                  | N[ ] ... N[ ] |
| 1ZNQO | <a href="#">CYS247(N)</a>  | 2.44 | <a href="#">THR246(CA)</a>  | 1ZNQO |                                                                                                  | N[ ] ... C[ ] |
| 1ZNQO | <a href="#">CYS247(N)</a>  | 2.25 | <a href="#">THR246(O)</a>   | 1ZNQO | [D-A-AA]:29.9° [A-D-DD]:92.5° d_planarity:1.2°<br>a_planarity:0.5°, bad a_angle(sp2)             | N[ ] ... O[ ] |
| 1ZNQO | <a href="#">CYS247(N)</a>  | 3.49 | <a href="#">THR246(CB)</a>  | 1ZNQO |                                                                                                  | N[ ] ... C[ ] |
| 1ZNQO | <a href="#">CYS247(N)</a>  | 4.68 | <a href="#">THR246(OG1)</a> | 1ZNQO | [D-A-AA]:28.0° [A-D-DD]:153.4° d_planarity:31.7°,<br>maximum distance exceeded, bad a_angle(sp3) |               |
| 1ZNQO | <a href="#">CYS247(N)</a>  | 3.55 | <a href="#">THR246(CG2)</a> | 1ZNQO |                                                                                                  | N[ ] ... C[ ] |
| 1ZNQO | <a href="#">CYS247(CA)</a> | 4.60 | <a href="#">THR246(N)</a>   | 1ZNQO |                                                                                                  |               |
| 1ZNQO | <a href="#">CYS247(CA)</a> | 3.80 | <a href="#">THR246(CA)</a>  | 1ZNQO |                                                                                                  | C[ ] ... C[ ] |
| 1ZNQO | <a href="#">CYS247(CA)</a> | 2.41 | <a href="#">THR246(C)</a>   | 1ZNQO |                                                                                                  | C[ ] ... C[ ] |
| 1ZNQO | <a href="#">CYS247(CA)</a> | 2.73 | <a href="#">THR246(O)</a>   | 1ZNQO |                                                                                                  | C[ ] ... O[ ] |
| 1ZNQO | <a href="#">CYS247(CA)</a> | 4.72 | <a href="#">THR246(CB)</a>  | 1ZNQO |                                                                                                  |               |
| 1ZNQO | <a href="#">CYS247(CA)</a> | 4.64 | <a href="#">THR246(CG2)</a> | 1ZNQO |                                                                                                  |               |
| 1ZNQO | <a href="#">CYS247(C)</a>  | 4.91 | <a href="#">THR246(CA)</a>  | 1ZNQO |                                                                                                  |               |
| 1ZNQO | <a href="#">CYS247(C)</a>  | 3.68 | <a href="#">THR246(C)</a>   | 1ZNQO |                                                                                                  | C[ ] ... C[ ] |
| 1ZNQO | <a href="#">CYS247(C)</a>  | 4.10 | <a href="#">THR246(O)</a>   | 1ZNQO |                                                                                                  | C[ ] ... O[ ] |
| 1ZNQO | <a href="#">CYS247(O)</a>  | 4.11 | <a href="#">THR246(C)</a>   | 1ZNQO |                                                                                                  | O[ ] ... C[ ] |
| 1ZNQO | <a href="#">CYS247(O)</a>  | 4.80 | <a href="#">THR246(O)</a>   | 1ZNQO |                                                                                                  |               |
| 1ZNQO | <a href="#">CYS247(CB)</a> | 4.89 | <a href="#">THR246(N)</a>   | 1ZNQO |                                                                                                  |               |
| 1ZNQO | <a href="#">CYS247(CB)</a> | 4.50 | <a href="#">THR246(CA)</a>  | 1ZNQO |                                                                                                  |               |
| 1ZNQO | <a href="#">CYS247(CB)</a> | 3.21 | <a href="#">THR246(C)</a>   | 1ZNQO |                                                                                                  | C[ ] ... C[ ] |
| 1ZNQO | <a href="#">CYS247(CB)</a> | 3.42 | <a href="#">THR246(O)</a>   | 1ZNQO |                                                                                                  | C[ ] ... O[ ] |
| 1ZNQO | <a href="#">CYS247(SG)</a> | 4.90 | <a href="#">THR246(CA)</a>  | 1ZNQO |                                                                                                  |               |
| 1ZNQO | <a href="#">CYS247(SG)</a> | 4.05 | <a href="#">THR246(C)</a>   | 1ZNQO |                                                                                                  | S[ ] ... C[ ] |
| 1ZNQO | <a href="#">CYS247(SG)</a> | 4.66 | <a href="#">THR246(O)</a>   | 1ZNQO |                                                                                                  |               |
| 1ZNQO | <a href="#">CYS247(N)</a>  | 3.67 | <a href="#">ARG248(N)</a>   | 1ZNQO |                                                                                                  | N[ ] ... N[ ] |
| 1ZNQO | <a href="#">CYS247(N)</a>  | 4.94 | <a href="#">ARG248(CA)</a>  | 1ZNQO |                                                                                                  |               |
| 1ZNQO | <a href="#">CYS247(CA)</a> | 2.40 | <a href="#">ARG248(N)</a>   | 1ZNQO |                                                                                                  | C[ ] ... N[ ] |
| 1ZNQO | <a href="#">CYS247(CA)</a> | 3.78 | <a href="#">ARG248(CA)</a>  | 1ZNQO |                                                                                                  | C[ ] ... C[ ] |
| 1ZNQO | <a href="#">CYS247(CA)</a> | 4.50 | <a href="#">ARG248(C)</a>   | 1ZNQO |                                                                                                  | C[ ] ... C[ ] |
| 1ZNQO | <a href="#">CYS247(CA)</a> | 4.68 | <a href="#">ARG248(O)</a>   | 1ZNQO |                                                                                                  |               |
| 1ZNQO | <a href="#">CYS247(CA)</a> | 4.79 | <a href="#">ARG248(CB)</a>  | 1ZNQO |                                                                                                  |               |
| 1ZNQO | <a href="#">CYS247(C)</a>  | 2.44 | <a href="#">ARG248(CA)</a>  | 1ZNQO |                                                                                                  | C[ ] ... C[ ] |
| 1ZNQO | <a href="#">CYS247(C)</a>  | 3.28 | <a href="#">ARG248(C)</a>   | 1ZNQO |                                                                                                  | C[ ] ... C[ ] |
| 1ZNQO | <a href="#">CYS247(C)</a>  | 3.78 | <a href="#">ARG248(O)</a>   | 1ZNQO |                                                                                                  | C[ ] ... O[ ] |
| 1ZNQO | <a href="#">CYS247(C)</a>  | 3.62 | <a href="#">ARG248(CB)</a>  | 1ZNQO |                                                                                                  | C[ ] ... C[ ] |
| 1ZNQO | <a href="#">CYS247(C)</a>  | 4.83 | <a href="#">ARG248(CG)</a>  | 1ZNQO |                                                                                                  |               |
| 1ZNQO | <a href="#">CYS247(O)</a>  | 2.28 | <a href="#">ARG248(N)</a>   | 1ZNQO | [D-A-AA]:28.8° [A-D-DD]:94.9° d_planarity:1.1°<br>a_planarity:0.3°, bad a_angle(sp2)             | O[ ] ... N[ ] |
| 1ZNQO | <a href="#">CYS247(O)</a>  | 2.81 | <a href="#">ARG248(CA)</a>  | 1ZNQO |                                                                                                  | O[ ] ... C[ ] |
| 1ZNQO | <a href="#">CYS247(O)</a>  | 3.60 | <a href="#">ARG248(C)</a>   | 1ZNQO |                                                                                                  | O[ ] ... C[ ] |
| 1ZNQO | <a href="#">CYS247(O)</a>  | 4.38 | <a href="#">ARG248(O)</a>   | 1ZNQO |                                                                                                  | O[ ] ... O[ ] |
| 1ZNQO | <a href="#">CYS247(O)</a>  | 4.10 | <a href="#">ARG248(CB)</a>  | 1ZNQO |                                                                                                  | O[ ] ... C[ ] |
| 1ZNQO | <a href="#">CYS247(CB)</a> | 3.08 | <a href="#">ARG248(N)</a>   | 1ZNQO |                                                                                                  | C[ ] ... N[ ] |

|       |                             |      |                              |       |                                                                                                                                        |               |
|-------|-----------------------------|------|------------------------------|-------|----------------------------------------------------------------------------------------------------------------------------------------|---------------|
| 1ZNQO | <a href="#">CYS247</a> (CB) | 4.38 | <a href="#">ARG248</a> (CA)  | 1ZNQO |                                                                                                                                        | C[ ] ... C[ ] |
| 1ZNQO | <a href="#">CYS247</a> (CB) | 4.61 | <a href="#">ARG248</a> (C)   | 1ZNQO |                                                                                                                                        |               |
| 1ZNQO | <a href="#">CYS247</a> (CB) | 4.49 | <a href="#">ARG248</a> (O)   | 1ZNQO |                                                                                                                                        | C[ ] ... O[ ] |
| 1ZNQO | <a href="#">CYS247</a> (SG) | 4.19 | <a href="#">ARG248</a> (N)   | 1ZNQO | [D-A-AA]:41.9° [A-D-DD]:127.0° d_planarity:52.1°,<br>maximum distance exceeded, bad a_angle(sp3)                                       | S[ ] ... N[ ] |
| 1ZNQO | <a href="#">CYS247</a> (C)  | 4.03 | <a href="#">LEU249</a> (N)   | 1ZNQO |                                                                                                                                        | C[ ] ... N[ ] |
| 1ZNQO | <a href="#">CYS247</a> (O)  | 3.96 | <a href="#">LEU249</a> (N)   | 1ZNQO | [D-A-AA]:84.3° [A-D-DD]:139.7° d_planarity:87.4°<br>a_planarity:31.4°, maximum distance exceeded,<br>bad a_angle(sp2), bad d_planarity | O[ ] ... N[ ] |
| 1ZNQO | <a href="#">CYS247</a> (O)  | 4.63 | <a href="#">LEU249</a> (CG)  | 1ZNQO |                                                                                                                                        |               |
| 1ZNQO | <a href="#">CYS247</a> (O)  | 4.88 | <a href="#">LEU249</a> (CD2) | 1ZNQO |                                                                                                                                        |               |
| 1ZNQO | <a href="#">CYS247</a> (SG) | 4.95 | <a href="#">LEU249</a> (CG)  | 1ZNQO |                                                                                                                                        |               |
| 1ZNQO | <a href="#">CYS247</a> (SG) | 4.15 | <a href="#">LEU249</a> (CD2) | 1ZNQO |                                                                                                                                        | S[ ] ... C[ ] |
| 1ZNQO | <a href="#">CYS247</a> (C)  | 4.12 | <a href="#">HIS306</a> (O)   | 1ZNQO |                                                                                                                                        | C[ ] ... O[ ] |
| 1ZNQO | <a href="#">CYS247</a> (O)  | 4.24 | <a href="#">HIS306</a> (C)   | 1ZNQO |                                                                                                                                        | O[ ] ... C[ ] |
| 1ZNQO | <a href="#">CYS247</a> (O)  | 3.42 | <a href="#">HIS306</a> (O)   | 1ZNQO |                                                                                                                                        | O[ ] ... O[ ] |
| 1ZNQO | <a href="#">CYS247</a> (N)  | 4.96 | <a href="#">PHE307</a> (CD1) | 1ZNQO |                                                                                                                                        |               |
| 1ZNQO | <a href="#">CYS247</a> (N)  | 4.86 | <a href="#">PHE307</a> (CE1) | 1ZNQO |                                                                                                                                        |               |
| 1ZNQO | <a href="#">CYS247</a> (CA) | 4.98 | <a href="#">PHE307</a> (CD1) | 1ZNQO |                                                                                                                                        |               |
| 1ZNQO | <a href="#">CYS247</a> (C)  | 4.64 | <a href="#">PHE307</a> (CA)  | 1ZNQO |                                                                                                                                        |               |
| 1ZNQO | <a href="#">CYS247</a> (C)  | 4.14 | <a href="#">PHE307</a> (CD1) | 1ZNQO |                                                                                                                                        | C[ ] ... C[ ] |
| 1ZNQO | <a href="#">CYS247</a> (C)  | 4.54 | <a href="#">PHE307</a> (CE1) | 1ZNQO |                                                                                                                                        |               |
| 1ZNQO | <a href="#">CYS247</a> (O)  | 4.34 | <a href="#">PHE307</a> (N)   | 1ZNQO | [D-A-AA]:143.0° [A-D-DD]:49.5° d_planarity:27.2°<br>a_planarity:15.1°, maximum distance exceeded,<br>bad d_angle(sp2)                  | O[ ] ... N[ ] |
| 1ZNQO | <a href="#">CYS247</a> (O)  | 3.57 | <a href="#">PHE307</a> (CA)  | 1ZNQO |                                                                                                                                        | O[ ] ... C[ ] |
| 1ZNQO | <a href="#">CYS247</a> (O)  | 3.89 | <a href="#">PHE307</a> (C)   | 1ZNQO |                                                                                                                                        | O[ ] ... C[ ] |
| 1ZNQO | <a href="#">CYS247</a> (O)  | 4.60 | <a href="#">PHE307</a> (CB)  | 1ZNQO |                                                                                                                                        |               |
| 1ZNQO | <a href="#">CYS247</a> (O)  | 4.52 | <a href="#">PHE307</a> (CG)  | 1ZNQO |                                                                                                                                        |               |
| 1ZNQO | <a href="#">CYS247</a> (O)  | 3.70 | <a href="#">PHE307</a> (CD1) | 1ZNQO |                                                                                                                                        | O[ ] ... C[ ] |
| 1ZNQO | <a href="#">CYS247</a> (O)  | 4.38 | <a href="#">PHE307</a> (CE1) | 1ZNQO |                                                                                                                                        | O[ ] ... C[ ] |
| 1ZNQO | <a href="#">CYS247</a> (N)  | 4.68 | <a href="#">VAL308</a> (N)   | 1ZNQO |                                                                                                                                        |               |
| 1ZNQO | <a href="#">CYS247</a> (N)  | 4.31 | <a href="#">VAL308</a> (C)   | 1ZNQO |                                                                                                                                        | N[ ] ... C[ ] |
| 1ZNQO | <a href="#">CYS247</a> (N)  | 3.10 | <a href="#">VAL308</a> (O)   | 1ZNQO | <b>H-bond</b> [D-A-AA]:167.1° [A-D-DD]:131.4° d_planarity:-<br>4.1° a_planarity:-20.8°                                                 | N[ ] ... O[ ] |
| 1ZNQO | <a href="#">CYS247</a> (CA) | 4.20 | <a href="#">VAL308</a> (O)   | 1ZNQO |                                                                                                                                        | C[ ] ... O[ ] |
| 1ZNQO | <a href="#">CYS247</a> (C)  | 4.39 | <a href="#">VAL308</a> (N)   | 1ZNQO |                                                                                                                                        | C[ ] ... N[ ] |
| 1ZNQO | <a href="#">CYS247</a> (C)  | 4.39 | <a href="#">VAL308</a> (O)   | 1ZNQO |                                                                                                                                        | C[ ] ... O[ ] |
| 1ZNQO | <a href="#">CYS247</a> (O)  | 3.20 | <a href="#">VAL308</a> (N)   | 1ZNQO | <b>H-bond</b> [D-A-AA]:162.2° [A-D-DD]:128.7° d_planarity:-<br>2.8° a_planarity:-33.9°                                                 | O[ ] ... N[ ] |
| 1ZNQO | <a href="#">CYS247</a> (O)  | 4.26 | <a href="#">VAL308</a> (CA)  | 1ZNQO |                                                                                                                                        | O[ ] ... C[ ] |
| 1ZNQO | <a href="#">CYS247</a> (O)  | 4.43 | <a href="#">VAL308</a> (C)   | 1ZNQO |                                                                                                                                        | O[ ] ... C[ ] |
| 1ZNQO | <a href="#">CYS247</a> (O)  | 3.69 | <a href="#">VAL308</a> (O)   | 1ZNQO |                                                                                                                                        | O[ ] ... O[ ] |
| 1ZNQO | <a href="#">CYS247</a> (O)  | 4.87 | <a href="#">VAL308</a> (CB)  | 1ZNQO |                                                                                                                                        |               |
| 1ZNQO | <a href="#">CYS247</a> (O)  | 4.29 | <a href="#">VAL308</a> (CG1) | 1ZNQO |                                                                                                                                        | O[ ] ... C[ ] |
| 1ZNQO | <a href="#">CYS247</a> (CB) | 4.86 | <a href="#">VAL308</a> (O)   | 1ZNQO |                                                                                                                                        |               |
| 1ZNQO | <a href="#">CYS247</a> (SG) | 4.30 | <a href="#">VAL308</a> (O)   | 1ZNQO |                                                                                                                                        | S[ ] ... O[ ] |
| 1ZNQO | <a href="#">CYS247</a> (SG) | 4.43 | <a href="#">VAL308</a> (CG1) | 1ZNQO |                                                                                                                                        | S[ ] ... C[ ] |
| 1ZNQO | <a href="#">CYS247</a> (SG) | 4.79 | <a href="#">LEU310</a> (CD1) | 1ZNQO |                                                                                                                                        |               |
| 1ZNQO | <a href="#">CYS247</a> (CA) | 4.78 | <a href="#">PHE307</a> (CZ)  | 1ZNQP |                                                                                                                                        |               |
